# Supplementary material for: Integrated Genomic Analysis of Primary Prostate Tumor Foci and Corresponding Lymph Node Metastases Identifies Mutations and Pathways Associated with Metastasis
Source: Preprints.org preprint supplement (doi:10.20944/preprints202310.1586.v1), 2023-10-25
Supplement: Supplementary file 2 [file Table_S11_intersection.NP.PTF.met.PTF.non.met.sig.xlsx]

## Sheet: Table_S11_intersection.NP.PTF.m
gene_id	ensgene	symbol	baseMean	log2FoldChange	lfcSE	stat	pvalue	padj	chr	start	end	strand	gene_type	source	cds.start	cds.end	protein_id
ENSG00000167972.13	ENSG00000167972	ABCA3	373.8	-0.335591	0.0942352	-3.56121	0.000369155	0.00593017	chr16	2275881	2340746	-	protein_coding	HAVANA	2276677	2326466	ENSP00000301732.5|ENSP00000371818.3|ENSP00000454397.1
ENSG00000129968.15	ENSG00000129968	ABHD17A	364.652	-0.236813	0.0633728	-3.73682	0.000186362	0.00364083	chr19	1876810	1885547	-	protein_coding	HAVANA	1877203	1881566	ENSP00000292577.6|ENSP00000250974.9|ENSP00000467638.1|ENSP00000466977.1
ENSG00000146109.4	ENSG00000146109	ABT1	125.133	-0.230189	0.0585127	-3.934	8.35e-05	0.00209637	chr6	26596952	26600744	+	protein_coding	HAVANA	26596983	26598642	ENSP00000274849.1
ENSG00000232046.6	ENSG00000232046	AC007392.3	40.1586	0.74434	0.181717	4.09614	4.2e-05	0.00129384	chr2	66574030	66730157	+	lincRNA	HAVANA	NA	NA
ENSG00000233251.7	ENSG00000233251	AC007743.1	23.9045	0.479966	0.169574	2.83042	0.00464874	0.0339413	chr2	56173534	56185770	-	antisense	HAVANA	NA	NA
ENSG00000223923.1	ENSG00000223923	AC010136.2	13.8709	0.751534	0.189575	3.96431	7.36e-05	0.00194456	chr2	217978707	217992615	+	antisense	HAVANA	NA	NA
ENSG00000231621.1	ENSG00000231621	AC013264.2	17.0802	-0.83585	0.246676	-3.38845	0.000702891	0.00920351	chr2	197197991	197199273	+	antisense	HAVANA	NA	NA
ENSG00000091436.16	ENSG00000091436	AC013461.1	1117.37	0.40367	0.147046	2.74519	0.00604762	0.0403886	chr2	173075435	173268010	+	protein_coding	HAVANA|ENSEMBL	173091032	173266747	ENSP00000439414.1|ENSP00000387259.2|ENSP00000340257.3|ENSP00000364361.3|ENSP00000411923.1
ENSG00000265249.1	ENSG00000265249	AC025280.1	14.4533	0.880192	0.269064	3.27131	0.0010705	0.0124295	chr16	84852968	84853067	+	miRNA	ENSEMBL	NA	NA
ENSG00000280323.1	ENSG00000280323	AC053503.12	74.6776	0.923367	0.249629	3.69896	0.000216488	0.00406445	chr2	219427477	219429319	+	TEC	HAVANA	NA	NA
ENSG00000233757.6	ENSG00000233757	AC092835.2	58.8561	0.377594	0.110192	3.4267	0.000610956	0.00837988	chr2	95207535	95259774	+	protein_coding	HAVANA	95207816	95259144	ENSP00000478941.1|ENSP00000482715.1
ENSG00000220804.8	ENSG00000220804	AC093642.5	219.598	-0.506633	0.164461	-3.08056	0.00206613	0.0195946	chr2	242088633	242160153	+	transcribed_unprocessed_pseudogene	HAVANA	NA	NA
ENSG00000280447.1	ENSG00000280447	AC109486.1	16.63	0.772602	0.230487	3.35204	0.000802194	0.010151	chr5	60430738	60431112	+	protein_coding	ENSEMBL	60430738	60431109	ENSP00000485453.1
ENSG00000256546.1	ENSG00000256546	AC156455.1	46.3412	0.594207	0.144041	4.12526	3.7e-05	0.00118246	chr12	122063306	122068616	+	processed_transcript	HAVANA	NA	NA
ENSG00000278540.4	ENSG00000278540	ACACA	4915.12	-0.620855	0.168777	-3.67854	0.000234569	0.00429469	chr17	37084988	37406818	-	protein_coding	HAVANA	37087056	37406299	ENSP00000483300.1|ENSP00000482269.1|ENSP00000478547.1|ENSP00000483969.1|ENSP00000482368.1|ENSP00000480371.1|ENSP00000482064.1|ENSP00000482498.1|ENSP00000483696.1|ENSP00000479621.1|ENSP00000481900.1|ENSP00000477912.1|ENSP00000483852.1|ENSP00000484948.1
ENSG00000162390.17	ENSG00000162390	ACOT11	304.095	0.832508	0.180188	4.62023	3.83e-06	0.00024218	chr1	54542257	54639192	+	protein_coding	HAVANA	54548310	54634726	ENSP00000340260.2|ENSP00000360366.3
ENSG00000168306.12	ENSG00000168306	ACOX2	105.277	0.796637	0.126984	6.27353	3.53e-10	3.13e-07	chr3	58505136	58537319	-	protein_coding	HAVANA	58505227	58535106	ENSP00000418562.2|ENSP00000307697.5|ENSP00000417877.1|ENSP00000418515.1|ENSP00000419133.1|ENSP00000419927.1
ENSG00000154930.14	ENSG00000154930	ACSS1	937.75	-0.355802	0.0897945	-3.9624	7.42e-05	0.00195374	chr20	25006230	25058980	-	protein_coding	HAVANA|ENSEMBL	25006863	25058102	ENSP00000439304.2|ENSP00000388793.2|ENSP00000316924.4|ENSP00000365916.3
ENSG00000111058.7	ENSG00000111058	ACSS3	268.207	0.444336	0.10243	4.33794	1.44e-05	0.000610732	chr12	80936414	81261205	+	protein_coding	HAVANA	81078121	81254919	ENSP00000447748.1|ENSP00000449535.1|ENSP00000261206.3|ENSP00000449507.1
ENSG00000119640.8	ENSG00000119640	ACYP1	88.6628	-0.250485	0.0617278	-4.0579	4.95e-05	0.00146103	chr14	75053221	75069483	-	protein_coding	HAVANA	75053447	75069291	ENSP00000238618.3|ENSP00000450873.1|ENSP00000350655.3|ENSP00000451581.1|ENSP00000452249.1|ENSP00000451220.1
ENSG00000042980.12	ENSG00000042980	ADAM28	442.297	-1.25978	0.214248	-5.87998	4.1e-09	1.98e-06	chr8	24294040	24359018	+	protein_coding	HAVANA	24294150	24354401	ENSP00000265769.4|ENSP00000431108.1|ENSP00000430085.1|ENSP00000393699.2|ENSP00000429484.1|ENSP00000430094.1
ENSG00000163638.13	ENSG00000163638	ADAMTS9	714.408	0.579546	0.163222	3.55066	0.000384273	0.00610441	chr3	64515654	64688000	-	protein_coding	HAVANA	64522174	64687657	ENSP00000418735.1|ENSP00000295903.4|ENSP00000478086.1|ENSP00000417521.1|ENSP00000419217.1
ENSG00000241158.5	ENSG00000241158	ADAMTS9-AS1	178.07	0.73961	0.179981	4.10937	3.97e-05	0.00124523	chr3	64561322	64592757	+	antisense	HAVANA	NA	NA
ENSG00000241684.5	ENSG00000241684	ADAMTS9-AS2	349.544	0.791493	0.150832	5.24751	1.54e-07	2.58e-05	chr3	64684909	65011468	+	antisense	HAVANA	NA	NA
ENSG00000173175.14	ENSG00000173175	ADCY5	491.084	0.559372	0.161457	3.46452	0.000531171	0.00754976	chr3	123282296	123449758	-	protein_coding	HAVANA	123284611	123448545	ENSP00000419361.1|ENSP00000418537.1|ENSP00000308685.5|ENSP00000420082.1|ENSP00000420252.1|ENSP00000417789.1
ENSG00000111452.12	ENSG00000111452	ADGRD1	258.721	0.539632	0.177784	3.03532	0.0024028	0.0217179	chr12	130953907	131141469	+	protein_coding	HAVANA	130954466	131139260	ENSP00000261654.5|ENSP00000442501.1|ENSP00000444425.1|ENSP00000482235.1|ENSP00000334127.7|ENSP00000438021.1
ENSG00000117114.19	ENSG00000117114	ADGRL2	753.007	0.428945	0.119904	3.57742	0.000347001	0.00567306	chr1	81306160	81992436	+	protein_coding	HAVANA|ENSEMBL	81836985	81991142	ENSP00000359756.1|ENSP00000359762.1|ENSP00000359760.1|ENSP00000359758.1|ENSP00000359763.1|ENSP00000359765.1|ENSP00000353006.2|ENSP00000359750.1|ENSP00000359748.1|ENSP00000322270.6|ENSP00000485786.1|ENSP00000359752.3|ENSP00000397740.1|ENSP00000385853.2
ENSG00000120907.17	ENSG00000120907	ADRA1A	211.255	0.633888	0.204645	3.0975	0.00195163	0.0188693	chr8	26748150	26867273	-	protein_coding	HAVANA	26748593	26864969	ENSP00000369960.1|ENSP00000431073.1|ENSP00000369956.3|ENSP00000430414.1|ENSP00000430793.1|ENSP00000346557.4|ENSP00000276393.4|ENSP00000369947.3|ENSP00000369946.3
ENSG00000173020.10	ENSG00000173020	ADRBK1	1318.25	-0.332384	0.0763157	-4.35539	1.33e-05	0.00057847	chr11	67266410	67286556	+	protein_coding	HAVANA	67266700	67286521	ENSP00000312262.5|ENSP00000434126.1
ENSG00000280429.1	ENSG00000280429	AF001548.3	189.208	0.756631	0.255172	2.96518	0.00302505	0.0253791	chr16	15790975	15792717	-	TEC	HAVANA	NA	NA
ENSG00000232855.6	ENSG00000232855	AF131217.1	402.351	0.792317	0.211322	3.74933	0.000177306	0.00350723	chr21	28439346	28674848	-	lincRNA	HAVANA	NA	NA
ENSG00000227170.1	ENSG00000227170	AF178030.2	20.2049	0.462934	0.117751	3.93145	8.44e-05	0.00210917	chr8	115509602	115511325	+	antisense	HAVANA	NA	NA
ENSG00000160216.18	ENSG00000160216	AGPAT3	971.555	-0.187658	0.0496199	-3.78192	0.000155626	0.00320284	chr21	43865186	43986536	+	protein_coding	HAVANA|ENSEMBL	43959682	43982389	ENSP00000291572.8|ENSP00000389318.1|ENSP00000381138.1|ENSP00000332989.2|ENSP00000412079.1|ENSP00000381140.2|ENSP00000381135.1|ENSP00000413906.1|ENSP00000394102.1|ENSP00000414440.1|ENSP00000443510.1
ENSG00000279355.1	ENSG00000279355	AGPAT4-IT1	28.4841	0.37062	0.136651	2.71217	0.00668452	0.0431561	chr6	161160105	161161982	-	TEC	HAVANA	NA	NA
ENSG00000156709.13	ENSG00000156709	AIFM1	273.448	-0.287024	0.074924	-3.83087	0.00012769	0.00281023	chrX	130129362	130165887	-	protein_coding	HAVANA|ENSEMBL	130129560	130165656	ENSP00000431222.1|ENSP00000402535.2|ENSP00000435955.1|ENSP00000316320.3|ENSP00000315122.3|ENSP00000446113.2|ENSP00000287295.3|ENSP00000432998.1
ENSG00000117448.13	ENSG00000117448	AKR1A1	561.201	-0.293005	0.0817592	-3.58375	0.000338691	0.0055639	chr1	45550543	45570049	+	protein_coding	HAVANA|ENSEMBL	45561795	45569953	ENSP00000361140.3|ENSP00000480713.1|ENSP00000398414.1|ENSP00000476978.1|ENSP00000312606.4|ENSP00000476713.1
ENSG00000228563.1	ENSG00000228563	AL133247.2	21.1984	0.85499	0.210517	4.06139	4.88e-05	0.0014442	chr2	31526942	31563464	+	antisense	HAVANA	NA	NA
ENSG00000274983.1	ENSG00000274983	AL138994.1	11.6681	0.795836	0.207177	3.84133	0.000122371	0.00271936	chr14	54641608	54641705	-	miRNA	ENSEMBL	NA	NA
ENSG00000279508.1	ENSG00000279508	AL589743.1	54.1608	-1.11208	0.362644	-3.06658	0.00216523	0.0202269	chr14	19300177	19302924	-	protein_coding	ENSEMBL	19301934	19302563	ENSP00000485043.1
ENSG00000170017.12	ENSG00000170017	ALCAM	1779.04	-0.583378	0.167096	-3.49128	0.000480712	0.00708495	chr3	105366909	105576900	+	protein_coding	HAVANA	105367409	105571936	ENSP00000305988.5|ENSP00000419236.2|ENSP00000418213.2|ENSP00000418937.2
ENSG00000125652.7	ENSG00000125652	ALKBH7	130.151	-0.22208	0.074901	-2.96498	0.00302702	0.0253908	chr19	6372433	6375251	+	protein_coding	HAVANA	6372821	6374970	ENSP00000245812.2|ENSP00000470542.1|ENSP00000470562.1
ENSG00000155754.14	ENSG00000155754	ALS2CR11	46.2248	0.365105	0.116539	3.1329	0.00173089	0.0173281	chr2	201487425	201619178	-	protein_coding	HAVANA	201487615	201619130	ENSP00000286195.3|ENSP00000400672.1|ENSP00000409937.1|ENSP00000399016.1
ENSG00000242110.7	ENSG00000242110	AMACR	319.379	-1.1183	0.285986	-3.91032	9.22e-05	0.00224055	chr5	33986178	34008108	-	protein_coding	HAVANA	33988311	34008019	ENSP00000334424.6|ENSP00000371504.2|ENSP00000427227.1|ENSP00000371517.3|ENSP00000424351.1|ENSP00000476965.1|ENSP00000477411.1|ENSP00000477108.1
ENSG00000162066.14	ENSG00000162066	AMDHD2	108.973	-0.232902	0.074971	-3.10657	0.00189273	0.0184438	chr16	2520357	2531422	+	protein_coding	HAVANA	2520459	2530756	ENSP00000457136.1|ENSP00000293971.6|ENSP00000307481.4|ENSP00000391596.3|ENSP00000457021.1|ENSP00000456898.1|ENSP00000457398.1|ENSP00000456656.1
ENSG00000154188.9	ENSG00000154188	ANGPT1	257.632	0.686363	0.174648	3.92997	8.5e-05	0.00211981	chr8	107249482	107498055	-	protein_coding	HAVANA	107251858	107497558	ENSP00000428340.1|ENSP00000297450.3|ENSP00000430750.1|ENSP00000429349.1|ENSP00000428908.1
ENSG00000091879.13	ENSG00000091879	ANGPT2	215.263	-0.259191	0.0944003	-2.74566	0.00603895	0.0403529	chr8	6499651	6563409	-	protein_coding	HAVANA	6503104	6562934	ENSP00000314897.5|ENSP00000486858.1|ENSP00000343517.6|ENSP00000428023.1
ENSG00000065413.16	ENSG00000065413	ANKRD44	693.416	-0.828239	0.171312	-4.83468	1.33e-06	0.000115389	chr2	196967017	197311173	-	protein_coding	HAVANA|ENSEMBL	196967442	197310604	ENSP00000403415.1|ENSP00000282272.9|ENSP00000413091.1|ENSP00000331516.2|ENSP00000416319.1|ENSP00000387141.1|ENSP00000387233.1|ENSP00000405983.1|ENSP00000399895.1
ENSG00000236977.1	ENSG00000236977	ANKRD44-IT1	134.568	-1.12703	0.215308	-5.23451	1.65e-07	2.68e-05	chr2	197250858	197302519	-	sense_intronic	HAVANA	NA	NA
ENSG00000183831.6	ENSG00000183831	ANKRD45	13.5026	0.52681	0.193926	2.71655	0.00659654	0.0427901	chr1	173609561	173669862	-	protein_coding	HAVANA	173610148	173659418	ENSP00000331268.2
ENSG00000157999.5	ENSG00000157999	ANKRD61	65.7362	-0.313361	0.108637	-2.88448	0.0039206	0.0302969	chr7	6031376	6036386	+	protein_coding	HAVANA	6031376	6036383	ENSP00000386502.1
ENSG00000171714.10	ENSG00000171714	ANO5	165.564	0.786972	0.178446	4.41013	1.03e-05	0.000484975	chr11	22193176	22283357	+	protein_coding	HAVANA	22193493	22279762	ENSP00000315371.8
ENSG00000106367.13	ENSG00000106367	AP1S1	148.69	-0.377031	0.126663	-2.97663	0.00291432	0.0247455	chr7	101154397	101161596	+	protein_coding	HAVANA	101154515	101160563	ENSP00000336666.5|ENSP00000410780.1|ENSP00000399902.1
ENSG00000242802.6	ENSG00000242802	AP5Z1	286.432	-0.376062	0.0733316	-5.12824	2.92e-07	3.96e-05	chr7	4775622	4794312	+	protein_coding	HAVANA	4775716	4791382	ENSP00000297562.4
ENSG00000164062.12	ENSG00000164062	APEH	433.787	-0.290258	0.0960944	-3.02055	0.00252313	0.0224284	chr3	49674002	49683963	+	protein_coding	HAVANA	49674367	49683339	ENSP00000296456.5|ENSP00000414369.1|ENSP00000410149.1|ENSP00000402365.1|ENSP00000415862.1|ENSP00000401871.1|ENSP00000410366.1|ENSP00000404353.1|ENSP00000438180.1
ENSG00000101474.11	ENSG00000101474	APMAP	553.529	-0.264454	0.0779146	-3.39415	0.000688421	0.00906813	chr20	24962925	24992979	-	protein_coding	HAVANA	24963816	24992688	ENSP00000395874.1|ENSP00000217456.2
ENSG00000143761.13	ENSG00000143761	ARF1	1991.45	-0.3184	0.0880117	-3.6177	0.000297236	0.00508274	chr1	228082660	228099212	+	protein_coding	HAVANA|ENSEMBL	228097115	228098010	ENSP00000442980.1|ENSP00000272102.5|ENSP00000440005.1
ENSG00000004059.10	ENSG00000004059	ARF5	206.906	-0.242639	0.086872	-2.79306	0.0052212	0.0366992	chr7	127588345	127591705	+	protein_coding	HAVANA	127588499	127591296	ENSP00000000233.5|ENSP00000412701.1
ENSG00000112379.8	ENSG00000112379	ARFGEF3	5192	-0.598556	0.165747	-3.61126	0.000304719	0.00516483	chr6	138161921	138344663	+	protein_coding	HAVANA	138162087	138336483	ENSP00000251691.4
ENSG00000137727.12	ENSG00000137727	ARHGAP20	149.502	0.497279	0.130622	3.807	0.000140661	0.00300205	chr11	110577042	110713189	-	protein_coding	HAVANA	110577143	110712231	ENSP00000260283.4|ENSP00000437905.1|ENSP00000432076.1|ENSP00000436319.1|ENSP00000436522.1|ENSP00000431399.1
ENSG00000175906.4	ENSG00000175906	ARL4D	31.1486	0.577412	0.146411	3.94376	8.02e-05	0.00203937	chr17	43398959	43401137	+	protein_coding	HAVANA	43399733	43400335	ENSP00000322628.2
ENSG00000169126.15	ENSG00000169126	ARMC4	89.5556	0.48169	0.139877	3.44366	0.0005739	0.00797035	chr10	27812164	27999048	-	protein_coding	HAVANA	27812515	27995142	ENSP00000306410.5|ENSP00000398155.1|ENSP00000473438.1
ENSG00000180801.12	ENSG00000180801	ARSJ	128.773	0.716411	0.118356	6.05302	1.42e-09	8.39e-07	chr4	113900284	113979727	-	protein_coding	HAVANA	113902277	113978834	ENSP00000320219.7|ENSP00000421327.1
ENSG00000104763.17	ENSG00000104763	ASAH1	1602.23	-0.488908	0.17434	-2.80433	0.00504206	0.0357808	chr8	18056425	18084985	-	protein_coding	HAVANA	18057537	18084801	ENSP00000262097.6|ENSP00000371152.4|ENSP00000427751.1|ENSP00000326970.10
ENSG00000100628.11	ENSG00000100628	ASB2	157.505	0.474163	0.157075	3.01871	0.00253856	0.0225176	chr14	93934153	93976791	-	protein_coding	HAVANA	93934659	93964539	ENSP00000451575.1|ENSP00000320675.4|ENSP00000450940.1|ENSP00000451694.1|ENSP00000451654.1|ENSP00000451355.1
ENSG00000141431.9	ENSG00000141431	ASXL3	163.679	0.713869	0.157027	4.54615	5.46e-06	0.000311829	chr18	33578615	33751192	+	protein_coding	HAVANA	33578632	33746592	ENSP00000465053.1|ENSP00000466073.1|ENSP00000269197.4|ENSP00000468024.1|ENSP00000466655.1|ENSP00000465634.1|ENSP00000466244.1|ENSP00000468264.1|ENSP00000467648.1|ENSP00000466030.1|ENSP00000468533.1|ENSP00000467907.1|ENSP00000464931.1
ENSG00000105726.16	ENSG00000105726	ATP13A1	526.492	-0.285547	0.0671291	-4.2537	2.1e-05	0.000790548	chr19	19645198	19663693	-	protein_coding	HAVANA	19645425	19663666	ENSP00000291503.5|ENSP00000349877.6|ENSP00000411891.1
ENSG00000159363.17	ENSG00000159363	ATP13A2	240.863	-0.249886	0.0703027	-3.55442	0.000378807	0.00604358	chr1	16985958	17011928	-	protein_coding	HAVANA|ENSEMBL	16985988	17011738	ENSP00000327214.8|ENSP00000341115.5|ENSP00000413307.1|ENSP00000423065.1|ENSP00000421126.1|ENSP00000478781.1|ENSP00000424393.1|ENSP00000424313.1|ENSP00000427241.1|ENSP00000422227.1|ENSP00000422668.1
ENSG00000018625.14	ENSG00000018625	ATP1A2	521.546	0.619439	0.186466	3.32199	0.000893769	0.0109742	chr1	160115759	160143591	+	protein_coding	HAVANA	160115862	160141319	ENSP00000354490.3|ENSP00000376066.3|ENSP00000411705.1
ENSG00000241468.7	ENSG00000241468	ATP5J2	177.967	-0.249691	0.0673187	-3.70909	0.000208007	0.00394137	chr7	99448475	99466331	-	protein_coding	HAVANA	99458330	99466141	ENSP00000412149.1|ENSP00000407540.1|ENSP00000352890.4|ENSP00000292475.3|ENSP00000418197.1|ENSP00000377740.3|ENSP00000430398.1
ENSG00000071553.16	ENSG00000071553	ATP6AP1	750.223	-0.256308	0.0890538	-2.87813	0.00400045	0.0306426	chrX	154428632	154436516	+	protein_coding	HAVANA|ENSEMBL	154428693	154435888	ENSP00000358777.2|ENSP00000398511.1|ENSP00000392375.1|ENSP00000408317.1|ENSP00000411209.1|ENSP00000396643.1|ENSP00000408470.1|ENSP00000482243.1
ENSG00000117410.13	ENSG00000117410	ATP6V0B	272.666	-0.243486	0.0866273	-2.81073	0.00494286	0.0352616	chr1	43974487	43978295	+	protein_coding	HAVANA	43975041	43978004	ENSP00000432994.1|ENSP00000431605.1|ENSP00000434729.1|ENSP00000236067.4|ENSP00000432754.1|ENSP00000435396.1|ENSP00000431375.1|ENSP00000434094.1
ENSG00000136888.6	ENSG00000136888	ATP6V1G1	832.731	-0.289701	0.10277	-2.81893	0.00481835	0.0346766	chr9	114587746	114598373	+	protein_coding	HAVANA	114587839	114597740	ENSP00000363162.3
ENSG00000124406.16	ENSG00000124406	ATP8A1	1476.57	-0.472271	0.104977	-4.49879	6.83e-06	0.000363792	chr4	42408373	42657105	-	protein_coding	HAVANA	42412919	42656873	ENSP00000426495.1|ENSP00000371084.5|ENSP00000264449.10|ENSP00000421164.1|ENSP00000426935.1|ENSP00000427295.1|ENSP00000426636.1
ENSG00000115307.16	ENSG00000115307	AUP1	391.844	-0.223096	0.0509705	-4.37697	1.2e-05	0.000541637	chr2	74526645	74529939	-	protein_coding	HAVANA	74526803	74529629	ENSP00000403430.1|ENSP00000366748.3
ENSG00000175756.13	ENSG00000175756	AURKAIP1	240.53	-0.234891	0.0713513	-3.29204	0.000994637	0.0118386	chr1	1373730	1375495	-	protein_coding	HAVANA	1373804	1374756	ENSP00000342676.3|ENSP00000340656.5|ENSP00000319778.5|ENSP00000368130.3
ENSG00000176022.4	ENSG00000176022	B3GALT6	146.08	-0.364821	0.0922516	-3.95463	7.67e-05	0.00199351	chr1	1232265	1235041	+	protein_coding	HAVANA	1232279	1233265	ENSP00000368496.2
ENSG00000149541.9	ENSG00000149541	B3GAT3	153.089	-0.232961	0.0687661	-3.38773	0.00070473	0.00922335	chr11	62615296	62622175	-	protein_coding	HAVANA	62615704	62621947	ENSP00000265471.5|ENSP00000431359.1|ENSP00000432604.1|ENSP00000432474.1|ENSP00000432854.1
ENSG00000176597.11	ENSG00000176597	B3GNT5	170.748	0.376149	0.115542	3.25552	0.00113185	0.0129164	chr3	183253244	183298504	+	protein_coding	HAVANA	183269799	183270932	ENSP00000316173.3|ENSP00000418785.1|ENSP00000420778.1|ENSP00000418477.1|ENSP00000417868.1|ENSP00000417301.1
ENSG00000118276.11	ENSG00000118276	B4GALT6	141.243	0.442187	0.117758	3.75504	0.000173311	0.0034529	chr18	31622247	31685836	-	protein_coding	HAVANA	31625617	31684426	ENSP00000306459.5|ENSP00000237019.7|ENSP00000372613.3|ENSP00000463961.1
ENSG00000204463.12	ENSG00000204463	BAG6	1036.44	-0.158906	0.0543677	-2.9228	0.00346895	0.0279339	chr6	31639028	31652705	-	protein_coding	HAVANA|ENSEMBL	31639134	31651763	ENSP00000413225.1|ENSP00000416633.1|ENSP00000365143.4|ENSP00000211379.5|ENSP00000365131.5|ENSP00000354875.6|ENSP00000402856.2|ENSP00000397978.1|ENSP00000410280.1|ENSP00000406434.1|ENSP00000411083.1|ENSP00000394856.1|ENSP00000404971.1|ENSP00000401031.1|ENSP00000413561.1|ENSP00000391613.1|ENSP00000388244.1|ENSP00000411043.1|ENSP00000391783.1|ENSP00000406302.1|ENSP00000406436.1|ENSP00000396503.1
ENSG00000258531.2	ENSG00000258531	BANF1P1	21.5279	0.665656	0.156414	4.25572	2.08e-05	0.000786903	chr14	68936602	68936864	+	processed_pseudogene	HAVANA	NA	NA
ENSG00000163930.9	ENSG00000163930	BAP1	606.39	-0.180772	0.0640847	-2.82083	0.00478992	0.0345337	chr3	52401013	52410350	-	protein_coding	HAVANA|ENSEMBL	52401676	52409878	ENSP00000417132.1|ENSP00000418320.1|ENSP00000296288.5|ENSP00000482839.1|ENSP00000420647.1|ENSP00000419709.1|ENSP00000417776.1
ENSG00000197580.11	ENSG00000197580	BCO2	100.001	0.272592	0.0783556	3.47891	0.000503458	0.00728444	chr11	112175467	112224699	+	protein_coding	HAVANA	112175602	112217871	ENSP00000350314.5|ENSP00000434488.1|ENSP00000354338.4|ENSP00000435869.1|ENSP00000436956.1|ENSP00000476560.2|ENSP00000414843.1|ENSP00000436615.1|ENSP00000431802.1|ENSP00000437053.1|ENSP00000432045.1|ENSP00000431882.1
ENSG00000183337.16	ENSG00000183337	BCOR	926.356	-0.244937	0.0812285	-3.01541	0.00256631	0.0227183	chrX	40049815	40177329	-	protein_coding	HAVANA|ENSEMBL	40049919	40077929	ENSP00000408006.1|ENSP00000367724.1|ENSP00000380512.3|ENSP00000367716.4|ENSP00000367705.4|ENSP00000345923.4|ENSP00000387552.1|ENSP00000403823.1|ENSP00000384485.2|ENSP00000483217.1|ENSP00000390273.1
ENSG00000164039.14	ENSG00000164039	BDH2	105.159	0.400411	0.113481	3.52845	0.000418005	0.00644541	chr4	103079435	103099883	-	protein_coding	HAVANA	103079705	103096254	ENSP00000296424.4|ENSP00000424173.1|ENSP00000421516.1|ENSP00000427442.1|ENSP00000422891.1
ENSG00000168398.6	ENSG00000168398	BDKRB2	99.4933	0.722362	0.16815	4.29593	1.74e-05	0.000687912	chr14	96204679	96244166	+	protein_coding	HAVANA	96237108	96241501	ENSP00000439459.2|ENSP00000450482.1|ENSP00000438376.1
ENSG00000133134.11	ENSG00000133134	BEX2	113.357	-0.43466	0.153829	-2.8256	0.00471916	0.0342409	chrX	103309346	103311046	-	protein_coding	HAVANA|ENSEMBL	103309593	103310597	ENSP00000361762.3|ENSP00000442521.1|ENSP00000361759.1|ENSP00000394915.1
ENSG00000132840.9	ENSG00000132840	BHMT2	143.62	0.516128	0.140329	3.67797	0.000235097	0.00430257	chr5	79069717	79089466	+	protein_coding	HAVANA	79069783	79088571	ENSP00000255192.3|ENSP00000428640.1|ENSP00000430278.1|ENSP00000430155.1
ENSG00000151746.13	ENSG00000151746	BICD1	1113.13	-0.543208	0.147513	-3.68243	0.000231019	0.00424373	chr12	32106835	32383633	+	protein_coding	HAVANA	32107332	32377624	ENSP00000448933.1|ENSP00000447663.1|ENSP00000446793.1|ENSP00000281474.5|ENSP00000379107.3|ENSP00000447238.1|ENSP00000475837.1|ENSP00000481877.1
ENSG00000259571.1	ENSG00000259571	BLID	15.2337	0.573538	0.16236	3.5325	0.000411655	0.00637253	chr11	122115354	122116215	-	protein_coding	HAVANA	122115599	122115922	ENSP00000453153.1
ENSG00000138696.10	ENSG00000138696	BMPR1B	2079.53	-0.5805	0.191984	-3.02368	0.00249717	0.022291	chr4	94757968	95158448	+	protein_coding	HAVANA|ENSEMBL	95051700	95154670	ENSP00000426617.1|ENSP00000421144.1|ENSP00000425444.1|ENSP00000421671.1|ENSP00000401907.2|ENSP00000424693.1|ENSP00000264568.4|ENSP00000378389.1
ENSG00000261236.5	ENSG00000261236	BOP1	226.763	-0.299326	0.0889874	-3.36369	0.000769083	0.00984545	chr8	144262102	144291370	-	protein_coding	HAVANA	144262167	144291370	ENSP00000455106.1|ENSP00000456082.1
ENSG00000218676.1	ENSG00000218676	BRD7P4	49.5856	0.417029	0.119036	3.50338	0.000459398	0.00686447	chr6	111430260	111431781	+	processed_pseudogene	HAVANA	NA	NA
ENSG00000254999.3	ENSG00000254999	BRK1	449.484	-0.322758	0.0908939	-3.55094	0.000383861	0.00610005	chr3	10115592	10127190	+	protein_coding	HAVANA	10115702	10126292	ENSP00000432472.1
ENSG00000132640.14	ENSG00000132640	BTBD3	322.655	0.318942	0.0913251	3.49238	0.000478729	0.00706747	chr20	11890723	11926609	+	protein_coding	HAVANA|ENSEMBL	11918276	11923663	ENSP00000254977.3|ENSP00000381971.2|ENSP00000384545.1|ENSP00000410502.1|ENSP00000404268.1|ENSP00000397809.1|ENSP00000483520.1|ENSP00000367471.2|ENSP00000477589.1|ENSP00000408817.1|ENSP00000404582.1
ENSG00000159388.5	ENSG00000159388	BTG2	1822.6	0.466645	0.151363	3.08296	0.00204955	0.0194958	chr1	203305491	203309602	+	protein_coding	HAVANA	203305607	203307435	ENSP00000433553.1|ENSP00000290551.4
ENSG00000106245.9	ENSG00000106245	BUD31	208.561	-0.272251	0.0790356	-3.44467	0.000571763	0.00795078	chr7	99408641	99419616	+	protein_coding	HAVANA	99411093	99419438	ENSP00000386023.2|ENSP00000416698.1|ENSP00000222969.5|ENSP00000395269.1|ENSP00000408269.1
ENSG00000112276.13	ENSG00000112276	BVES	131.931	0.376691	0.132572	2.84141	0.00449143	0.033148	chr6	105096822	105137174	-	protein_coding	HAVANA	105101092	105133577	ENSP00000313172.5|ENSP00000337259.5|ENSP00000397310.2
ENSG00000238279.1	ENSG00000238279	BX470102.3	11.5058	0.803807	0.216041	3.72063	0.000198729	0.00381348	chr1	153533603	153535115	+	antisense	HAVANA	NA	NA
ENSG00000211450.9	ENSG00000211450	C11orf31	142.032	-0.17962	0.0567244	-3.16654	0.00154265	0.0159781	chr11	57741250	57743554	+	protein_coding	HAVANA|ENSEMBL	57741596	57742214	ENSP00000481984.1|ENSP00000434511.1|ENSP00000373509.4|ENSP00000434875.1
ENSG00000166323.12	ENSG00000166323	C11orf65	81.4642	-0.482687	0.142586	-3.38522	0.000711203	0.00929663	chr11	108308519	108467531	-	protein_coding	HAVANA|ENSEMBL	108308974	108461559	ENSP00000433395.1|ENSP00000431706.1|ENSP00000483537.1|ENSP00000432827.1|ENSP00000436400.1|ENSP00000376799.1|ENSP00000434500.1
ENSG00000139971.15	ENSG00000139971	C14orf37	126.689	0.435532	0.136276	3.19595	0.00139372	0.0149356	chr14	57999735	58298139	-	protein_coding	HAVANA	58004739	58139358	ENSP00000267485.7|ENSP00000477692.1
ENSG00000186073.11	ENSG00000186073	C15orf41	142.403	0.358776	0.0970627	3.69634	0.000218731	0.00408406	chr15	36579611	36810248	+	protein_coding	HAVANA|ENSEMBL	36579861	36808932	ENSP00000455397.1|ENSP00000457227.1|ENSP00000401362.2|ENSP00000456477.1|ENSP00000454831.1|ENSP00000456736.1|ENSP00000457854.1|ENSP00000342433.4|ENSP00000454334.1|ENSP00000456240.1
ENSG00000166920.10	ENSG00000166920	C15orf48	64.0949	-1.10223	0.413475	-2.66577	0.00768118	0.0471899	chr15	45430529	45448761	+	protein_coding	HAVANA	45430797	45448761	ENSP00000379887.2|ENSP00000452967.1|ENSP00000341610.3
ENSG00000174917.8	ENSG00000174917	C19orf70	79.9309	-0.191955	0.0705526	-2.72074	0.00651359	0.0424173	chr19	5678421	5680896	-	protein_coding	HAVANA	5678554	5680486	ENSP00000468723.1|ENSP00000309561.3|ENSP00000465739.1|ENSP00000464857.1
ENSG00000143443.9	ENSG00000143443	C1orf56	99.5738	-0.268211	0.0675096	-3.97294	7.1e-05	0.00189866	chr1	151047740	151051986	+	protein_coding	HAVANA	151047848	151050455	ENSP00000357922.5
ENSG00000163145.12	ENSG00000163145	C1QTNF7	240.222	0.389007	0.139772	2.78315	0.00538347	0.0373947	chr4	15339818	15446166	+	protein_coding	HAVANA|ENSEMBL	15340195	15442796	ENSP00000380812.2|ENSP00000295297.4|ENSP00000371820.3|ENSP00000410722.1|ENSP00000388914.2
ENSG00000146540.14	ENSG00000146540	C7orf50	451.73	-0.252972	0.0861679	-2.9358	0.00332684	0.0271349	chr7	996986	1138260	-	protein_coding	HAVANA|ENSEMBL	997628	1127385	ENSP00000350011.5|ENSP00000380288.2|ENSP00000380286.3|ENSP00000407380.1|ENSP00000396542.1|ENSP00000420130.1
ENSG00000148120.14	ENSG00000148120	C9orf3	1173.64	0.307717	0.116649	2.63798	0.00834015	0.0497228	chr9	94726701	95087218	+	protein_coding	HAVANA|ENSEMBL	94759784	95082712	ENSP00000277198.2|ENSP00000297979.5|ENSP00000364464.2|ENSP00000387736.1|ENSP00000402171.1|ENSP00000401854.1|ENSP00000411451.1|ENSP00000413927.1|ENSP00000431923.1
ENSG00000186354.10	ENSG00000186354	C9orf47	80.4996	0.501851	0.140997	3.55931	0.000371831	0.0059602	chr9	88990863	88996140	+	protein_coding	HAVANA	88990996	88991985	ENSP00000365011.2|ENSP00000365010.3|ENSP00000335616.5
ENSG00000238227.7	ENSG00000238227	C9orf69	183.99	-0.26309	0.0665351	-3.95416	7.68e-05	0.00199393	chr9	136114581	136118863	-	protein_coding	HAVANA|ENSEMBL	136116484	136116900	ENSP00000452750.2|ENSP00000453019.1|ENSP00000457272.1|ENSP00000455849.1|ENSP00000458020.1
ENSG00000164879.6	ENSG00000164879	CA3	48.9836	1.06812	0.269576	3.96222	7.43e-05	0.00195408	chr8	85373436	85449040	+	protein_coding	HAVANA	85438910	85448150	ENSP00000429760.1|ENSP00000285381.2
ENSG00000160325.14	ENSG00000160325	CACFD1	168.817	-0.281325	0.0789611	-3.56283	0.000366876	0.00591718	chr9	133459965	133470848	+	protein_coding	HAVANA|ENSEMBL	133460067	133468708	ENSP00000444328.1|ENSP00000440832.1|ENSP00000291722.7|ENSP00000317121.4|ENSP00000414495.1
ENSG00000158966.13	ENSG00000158966	CACHD1	241.744	0.55605	0.128421	4.32991	1.49e-05	0.000625027	chr1	64470792	64693058	+	protein_coding	HAVANA	64470898	64691558	ENSP00000290039.5
ENSG00000163888.3	ENSG00000163888	CAMK2N2	16.4061	-0.603269	0.208425	-2.89441	0.00379867	0.029719	chr3	184259213	184261463	-	protein_coding	HAVANA	184260160	184261285	ENSP00000296238.3
ENSG00000272168.5	ENSG00000272168	CASC15	219.112	0.438784	0.146783	2.98934	0.00279581	0.0240714	chr6	21664772	22214505	+	lincRNA	HAVANA	NA	NA
ENSG00000254166.1	ENSG00000254166	CASC19	19.8301	-0.518357	0.190967	-2.71438	0.00664008	0.0429568	chr8	127185635	127203222	-	lincRNA	HAVANA	NA	NA
ENSG00000105971.14	ENSG00000105971	CAV2	266.63	0.495224	0.126667	3.90966	9.24e-05	0.00224427	chr7	116287380	116508541	+	protein_coding	HAVANA	116499782	116506156	ENSP00000222693.4|ENSP00000345679.2|ENSP00000377120.2
ENSG00000141582.14	ENSG00000141582	CBX4	456.758	-0.316031	0.0934167	-3.38303	0.000716921	0.00934084	chr17	79833156	79839429	-	protein_coding	HAVANA	79833962	79839251	ENSP00000269397.4|ENSP00000415348.1|ENSP00000461198.1
ENSG00000141570.10	ENSG00000141570	CBX8	151.992	-0.407651	0.129669	-3.14379	0.00166778	0.0168979	chr17	79792132	79801683	-	protein_coding	HAVANA	79794638	79798280	ENSP00000269385.4|ENSP00000405058.1|ENSP00000408753.2
ENSG00000163749.17	ENSG00000163749	CCDC158	65.7554	0.617789	0.141256	4.37355	1.22e-05	0.000546309	chr4	76312997	76421868	-	protein_coding	HAVANA	76313173	76403207	ENSP00000373566.2|ENSP00000401742.2
ENSG00000164989.15	ENSG00000164989	CCDC171	257.11	0.284209	0.0814314	3.49017	0.000482717	0.0071074	chr9	15552897	16061663	+	protein_coding	HAVANA|ENSEMBL	15564089	15971833	ENSP00000438838.1|ENSP00000370077.3|ENSP00000409055.2|ENSP00000399526.1
ENSG00000166960.16	ENSG00000166960	CCDC178	54.0546	1.14706	0.222451	5.15647	2.52e-07	3.61e-05	chr18	32937402	33441101	-	protein_coding	HAVANA|ENSEMBL	32938014	33412088	ENSP00000464295.1|ENSP00000385591.1|ENSP00000462651.1|ENSP00000372576.3|ENSP00000300227.8|ENSP00000462153.1|ENSP00000385867.2|ENSP00000463254.1|ENSP00000462370.1|ENSP00000382130.3|ENSP00000463236.1
ENSG00000122483.17	ENSG00000122483	CCDC18	151.084	-0.382145	0.110048	-3.47251	0.000515608	0.00740114	chr1	93179919	93278730	+	protein_coding	HAVANA	93180716	93278474	ENSP00000343377.7|ENSP00000383808.3|ENSP00000394234.1|ENSP00000359299.1|ENSP00000434031.1|ENSP00000431409.1|ENSP00000391151.1
ENSG00000117477.12	ENSG00000117477	CCDC181	57.424	0.410895	0.132766	3.09488	0.00196893	0.0189863	chr1	169394870	169460669	-	protein_coding	HAVANA	169395050	169424927	ENSP00000356780.3|ENSP00000356779.3|ENSP00000442297.1|ENSP00000479042.1|ENSP00000411000.1
ENSG00000101997.12	ENSG00000101997	CCDC22	137.456	-0.20025	0.067667	-2.95935	0.00308288	0.0257292	chrX	49235467	49250526	+	protein_coding	HAVANA	49235637	49250258	ENSP00000365401.3
ENSG00000138483.2	ENSG00000138483	CCDC54	11.9664	0.828472	0.245101	3.38013	0.000724525	0.00941056	chr3	107377194	107378637	+	protein_coding	HAVANA	107377588	107378571	ENSP00000261058.1
ENSG00000169515.5	ENSG00000169515	CCDC8	170.208	0.513432	0.174964	2.9345	0.00334089	0.0272045	chr19	46410372	46413584	-	protein_coding	HAVANA	46411197	46412810	ENSP00000303158.3
ENSG00000055813.5	ENSG00000055813	CCDC85A	30.9533	0.739913	0.167758	4.41061	1.03e-05	0.00048465	chr2	56184123	56386173	+	protein_coding	HAVANA	56184625	56384352	ENSP00000384040.2
ENSG00000248283.2	ENSG00000248283	CCNL2P1	62.7867	-0.438194	0.129065	-3.39514	0.000685943	0.00904967	chr4	42561457	42562425	-	processed_pseudogene	HAVANA	NA	NA
ENSG00000163468.14	ENSG00000163468	CCT3	1082.34	-0.229497	0.0748236	-3.06717	0.00216095	0.0202026	chr1	156308968	156367873	-	protein_coding	HAVANA	156309202	156367846	ENSP00000295688.3|ENSP00000357242.2|ENSP00000357241.3|ENSP00000357245.3|ENSP00000431543.1|ENSP00000413308.1|ENSP00000434232.1|ENSP00000434481.1|ENSP00000388799.1|ENSP00000435026.1|ENSP00000413431.1
ENSG00000110848.8	ENSG00000110848	CD69	108.658	-0.679644	0.224947	-3.02135	0.00251653	0.022403	chr12	9752486	9760901	-	protein_coding	HAVANA	9753484	9760820	ENSP00000228434.3|ENSP00000442597.1
ENSG00000163171.7	ENSG00000163171	CDC42EP3	941.978	0.338566	0.121741	2.78103	0.00541859	0.0375738	chr2	37641882	37738468	-	protein_coding	HAVANA|ENSEMBL	37645826	37646587	ENSP00000480549.1|ENSP00000295324.3|ENSP00000403298.1|ENSP00000398062.1|ENSP00000409147.1
ENSG00000167797.7	ENSG00000167797	CDK2AP2	178.644	-0.378712	0.0769976	-4.91849	8.72e-07	8.4e-05	chr11	67506497	67508649	-	protein_coding	HAVANA	67506948	67508082	ENSP00000301488.3|ENSP00000436213.1|ENSP00000431503.1
ENSG00000111860.13	ENSG00000111860	CEP85L	349.706	-0.321285	0.121778	-2.63828	0.00833268	0.0497004	chr6	118460772	118710075	-	protein_coding	HAVANA|ENSEMBL	118465408	118652781	ENSP00000357477.3|ENSP00000357474.5|ENSP00000392131.1|ENSP00000353434.3|ENSP00000376288.3|ENSP00000393317.2
ENSG00000090661.11	ENSG00000090661	CERS4	745.419	-0.373506	0.122189	-3.05679	0.00223723	0.0206844	chr19	8206736	8262421	+	protein_coding	HAVANA	8251077	8262106	ENSP00000453796.1|ENSP00000453388.1|ENSP00000452753.1|ENSP00000452910.1|ENSP00000251363.5|ENSP00000453509.1|ENSP00000453815.1|ENSP00000452920.1|ENSP00000454122.1
ENSG00000198848.12	ENSG00000198848	CES1	148.334	0.789662	0.209688	3.7659	0.000165953	0.00334543	chr16	55802851	55833337	-	protein_coding	HAVANA	55803052	55833055	ENSP00000455902.1|ENSP00000353720.3|ENSP00000390492.2|ENSP00000455959.1|ENSP00000355193.4|ENSP00000456865.1
ENSG00000172586.7	ENSG00000172586	CHCHD1	111.445	-0.22869	0.0759975	-3.00918	0.00261954	0.023001	chr10	73782047	73783652	+	protein_coding	HAVANA	73782076	73783184	ENSP00000361928.3|ENSP00000361923.5
ENSG00000177830.17	ENSG00000177830	CHID1	370.998	-0.195217	0.0659318	-2.96089	0.00306756	0.0256471	chr11	867860	915058	-	protein_coding	HAVANA|ENSEMBL	869861	904816	ENSP00000398722.2|ENSP00000391255.1|ENSP00000433879.1|ENSP00000431169.1|ENSP00000325055.8|ENSP00000431356.1|ENSP00000416034.2|ENSP00000435503.1|ENSP00000388156.2|ENSP00000435336.1|ENSP00000434651.1|ENSP00000432697.1|ENSP00000432431.1|ENSP00000436017.1|ENSP00000435731.1|ENSP00000436752.1|ENSP00000433570.1|ENSP00000435607.1|ENSP00000431766.1
ENSG00000154645.13	ENSG00000154645	CHODL	36.592	0.79083	0.220751	3.58245	0.000340388	0.00558764	chr21	17901263	18267373	+	protein_coding	HAVANA|ENSEMBL	18245224	18266150	ENSP00000382993.1|ENSP00000382996.1|ENSP00000383001.1|ENSP00000382992.1|ENSP00000299295.2|ENSP00000443566.1|ENSP00000339975.3
ENSG00000137975.7	ENSG00000137975	CLCA2	40.077	1.02061	0.257445	3.96437	7.36e-05	0.00194456	chr1	86424086	86456558	+	protein_coding	HAVANA	86424248	86455524	ENSP00000359596.4
ENSG00000109572.13	ENSG00000109572	CLCN3	1460.81	-0.370871	0.100534	-3.689	0.000225138	0.00416854	chr4	169612633	169723673	+	protein_coding	HAVANA|ENSEMBL	169635929	169720062	ENSP00000425160.1|ENSP00000424603.1|ENSP00000261514.5|ENSP00000353857.3|ENSP00000425823.1|ENSP00000425323.1|ENSP00000478336.1|ENSP00000424540.3|ENSP00000422678.1
ENSG00000103249.17	ENSG00000103249	CLCN7	413.541	-0.155751	0.0561522	-2.77372	0.00554186	0.0381034	chr16	1444934	1475580	-	protein_coding	HAVANA|ENSEMBL	1446275	1474974	ENSP00000372193.4|ENSP00000410907.1|ENSP00000262318.8|ENSP00000461009.1|ENSP00000454845.1
ENSG00000066405.12	ENSG00000066405	CLDN18	63.2233	0.563177	0.133208	4.22779	2.36e-05	0.000852595	chr3	137998735	138033655	+	protein_coding	HAVANA	137998869	138031138	ENSP00000340939.4|ENSP00000183605.5|ENSP00000419732.1
ENSG00000156284.5	ENSG00000156284	CLDN8	189.269	-0.629458	0.210218	-2.99431	0.00275071	0.0237709	chr21	30214006	30216073	-	protein_coding	HAVANA	30215251	30215925	ENSP00000382783.1
ENSG00000069493.14	ENSG00000069493	CLEC2D	438.186	-0.91325	0.178517	-5.11575	3.12e-07	4.14e-05	chr12	9664969	9699555	+	protein_coding	HAVANA	9669735	9694871	ENSP00000438735.1|ENSP00000261340.7|ENSP00000371409.3|ENSP00000290855.6|ENSP00000443110.1|ENSP00000399744.2|ENSP00000441653.1|ENSP00000444818.1|ENSP00000443065.1|ENSP00000261339.6|ENSP00000446028.1|ENSP00000443627.1|ENSP00000413045.1|ENSP00000437861.1|ENSP00000443177.1
ENSG00000159212.12	ENSG00000159212	CLIC6	135.192	1.02985	0.187249	5.49986	3.8e-08	9.25e-06	chr21	34669389	34718227	+	protein_coding	HAVANA	34669389	34716479	ENSP00000353959.3|ENSP00000290332.4
ENSG00000049656.13	ENSG00000049656	CLPTM1L	634.751	-0.24337	0.0599878	-4.05699	4.97e-05	0.0014632	chr5	1317744	1345099	-	protein_coding	HAVANA|ENSEMBL	1318372	1344841	ENSP00000313854.5|ENSP00000423321.1|ENSP00000485923.1
ENSG00000146352.12	ENSG00000146352	CLVS2	123.623	0.796982	0.249952	3.18853	0.00142996	0.015202	chr6	122995971	123072927	+	protein_coding	HAVANA	122997778	123063758	ENSP00000275162.4|ENSP00000357423.1
ENSG00000164309.14	ENSG00000164309	CMYA5	614.001	0.629445	0.152976	4.11468	3.88e-05	0.00122306	chr5	79689877	79800240	+	protein_coding	HAVANA	79689908	79799613	ENSP00000394770.2
ENSG00000088038.17	ENSG00000088038	CNOT3	665.085	-0.15501	0.053874	-2.87727	0.00401131	0.0307046	chr19	54137728	54155681	+	protein_coding	HAVANA|ENSEMBL	54142979	54155404	ENSP00000221232.5|ENSP00000351159.4|ENSP00000398463.1|ENSP00000483360.1|ENSP00000411587.2|ENSP00000401703.1|ENSP00000420064.1
ENSG00000137161.16	ENSG00000137161	CNPY3	406.131	-0.263844	0.0735643	-3.58658	0.000335048	0.00552226	chr6	42929192	42939287	+	protein_coding	HAVANA|ENSEMBL	42929571	42938788	ENSP00000377698.4|ENSP00000361926.4
ENSG00000119397.16	ENSG00000119397	CNTRL	748.615	-0.469442	0.118831	-3.95052	7.8e-05	0.0020076	chr9	121074863	121177610	+	protein_coding	HAVANA|ENSEMBL	121088327	121177183	ENSP00000362972.2|ENSP00000362962.1|ENSP00000238341.5|ENSP00000362956.1|ENSP00000362953.1|ENSP00000413014.1|ENSP00000481072.1|ENSP00000362950.1
ENSG00000181924.6	ENSG00000181924	COA4	207.257	-0.195617	0.0607666	-3.21915	0.00128571	0.0141426	chr11	73872667	73876988	-	protein_coding	HAVANA	73873118	73873405	ENSP00000347919.4|ENSP00000443795.1|ENSP00000440756.1|ENSP00000437772.1
ENSG00000068120.14	ENSG00000068120	COASY	280.394	-0.188035	0.0614347	-3.06073	0.00220795	0.0205006	chr17	42561467	42566277	+	protein_coding	HAVANA	42562412	42565965	ENSP00000467174.1|ENSP00000467519.1|ENSP00000466838.1|ENSP00000393564.2|ENSP00000467687.1|ENSP00000468755.1|ENSP00000468583.1|ENSP00000467322.1|ENSP00000464814.1|ENSP00000377406.1
ENSG00000197467.13	ENSG00000197467	COL13A1	167.35	0.895851	0.166908	5.36735	7.99e-08	1.66e-05	chr10	69801931	69964275	+	protein_coding	HAVANA|ENSEMBL	69802424	69957042	ENSP00000430089.1|ENSP00000381949.3|ENSP00000346553.3|ENSP00000350463.3|ENSP00000428057.1|ENSP00000381941.4|ENSP00000430061.1|ENSP00000428342.1|ENSP00000430173.1|ENSP00000381947.2|ENSP00000388774.1
ENSG00000114270.15	ENSG00000114270	COL7A1	1148.57	0.79949	0.139744	5.72111	1.06e-08	4.04e-06	chr3	48564073	48595267	-	protein_coding	HAVANA	48564409	48595159	ENSP00000332371.8|ENSP00000391608.1
ENSG00000198756.10	ENSG00000198756	COLGALT2	134.352	0.486346	0.148389	3.27751	0.00104728	0.0122502	chr1	183929854	184037729	-	protein_coding	HAVANA	183938764	184037357	ENSP00000356491.1|ENSP00000354960.4|ENSP00000356490.3
ENSG00000184432.9	ENSG00000184432	COPB2	1950.63	-0.357343	0.108344	-3.29823	0.000972973	0.0116623	chr3	139355600	139389732	-	protein_coding	HAVANA	139355681	139389550	ENSP00000426682.1|ENSP00000329419.4|ENSP00000422295.1|ENSP00000422917.1|ENSP00000423271.1|ENSP00000422547.1|ENSP00000424144.1|ENSP00000427185.1|ENSP00000422469.1
ENSG00000105669.12	ENSG00000105669	COPE	309.306	-0.214005	0.0693462	-3.08604	0.00202841	0.0193612	chr19	18899514	18919397	-	protein_coding	HAVANA|ENSEMBL	18899682	18919348	ENSP00000262812.3|ENSP00000483420.1|ENSP00000343134.3|ENSP00000469035.1|ENSP00000345674.3|ENSP00000471034.1
ENSG00000172725.13	ENSG00000172725	CORO1B	832.699	-0.315108	0.0934677	-3.3713	0.00074814	0.00964892	chr11	67435510	67443821	-	protein_coding	HAVANA|ENSEMBL	67438379	67442628	ENSP00000479949.1|ENSP00000377471.1|ENSP00000340211.5|ENSP00000445330.1|ENSP00000486585.1|ENSP00000438056.2
ENSG00000138495.6	ENSG00000138495	COX17	247.867	-0.371477	0.0953322	-3.89666	9.75e-05	0.00231981	chr3	119654513	119677454	-	protein_coding	HAVANA	119675152	119677310	ENSP00000420406.1|ENSP00000417805.1|ENSP00000261070.2|ENSP00000417120.1|ENSP00000417651.1|ENSP00000417923.1
ENSG00000111775.2	ENSG00000111775	COX6A1	83.4471	-0.277435	0.0851774	-3.25715	0.00112539	0.0128526	chr12	120438090	120440742	+	protein_coding	HAVANA	120438127	120440534	ENSP00000229379.2
ENSG00000126267.8	ENSG00000126267	COX6B1	390.88	-0.185497	0.0683379	-2.71441	0.00663934	0.0429568	chr19	35648223	35658861	+	protein_coding	HAVANA	35651244	35658644	ENSP00000246554.2|ENSP00000466818.2|ENSP00000376037.2|ENSP00000467776.2
ENSG00000106034.17	ENSG00000106034	CPED1	753.778	0.380828	0.14208	2.68038	0.00735385	0.0458854	chr7	120988677	121297444	+	protein_coding	HAVANA|ENSEMBL	120989622	121295649	ENSP00000309772.5|ENSP00000345235.5|ENSP00000398082.1|ENSP00000406122.2|ENSP00000428504.1|ENSP00000415573.1|ENSP00000391952.1
ENSG00000196353.11	ENSG00000196353	CPNE4	2282.1	-0.62736	0.22029	-2.84788	0.00440117	0.0326998	chr3	131533555	132285410	-	protein_coding	HAVANA|ENSEMBL	131535198	132037609	ENSP00000411904.1|ENSP00000478878.1|ENSP00000421705.1|ENSP00000424853.1|ENSP00000423811.1|ENSP00000421646.1|ENSP00000425506.1|ENSP00000427561.1|ENSP00000421394.1
ENSG00000224051.6	ENSG00000224051	CPTP	113.414	-0.212166	0.07162	-2.96239	0.00305261	0.0255571	chr1	1324756	1328897	+	protein_coding	HAVANA	1326911	1327760	ENSP00000343890.4|ENSP00000462636.1
ENSG00000103653.16	ENSG00000103653	CSK	473.864	-0.504703	0.106023	-4.76032	1.93e-06	0.000147595	chr15	74782057	74803198	+	protein_coding	HAVANA	74798298	74802510	ENSP00000220003.9|ENSP00000414764.2|ENSP00000457497.1|ENSP00000457714.1|ENSP00000454906.1|ENSP00000454640.1
ENSG00000160213.5	ENSG00000160213	CSTB	321.418	0.21949	0.0770578	2.84839	0.00439417	0.0326697	chr21	43772512	43776445	-	protein_coding	HAVANA	43774205	43776269	ENSP00000291568.5
ENSG00000243193.4	ENSG00000243193	CTA-360L10.1	27.123	0.446089	0.150818	2.95779	0.00309851	0.0257999	chr7	107066591	107133733	-	processed_transcript	HAVANA	NA	NA
ENSG00000250069.1	ENSG00000250069	CTB-131B5.2	47.809	0.363635	0.116078	3.13268	0.00173217	0.017337	chr5	140200163	140203187	+	sense_intronic	HAVANA	NA	NA
ENSG00000267749.1	ENSG00000267749	CTC-265F19.1	37.6982	-0.65113	0.183772	-3.54313	0.000395401	0.00620886	chr19	2641838	2643853	-	sense_intronic	HAVANA	NA	NA
ENSG00000267121.5	ENSG00000267121	CTD-2020K17.1	83.5688	-0.59947	0.191503	-3.13035	0.00174601	0.0174253	chr17	45190931	45222222	-	antisense	HAVANA	NA	NA
ENSG00000276107.1	ENSG00000276107	CTD-2033D15.2	169.877	0.698271	0.239593	2.9144	0.00356368	0.0284823	chr15	39586561	39587293	+	sense_intronic	HAVANA	NA	NA
ENSG00000241026.1	ENSG00000241026	CTD-2036J7.1	8.90397	0.769272	0.19009	4.04688	5.19e-05	0.00151135	chr8	22389865	22390655	-	unprocessed_pseudogene	HAVANA	NA	NA
ENSG00000263069.5	ENSG00000263069	CTD-2047H16.4	103.574	-0.233699	0.0791917	-2.95105	0.00316692	0.0262119	chr17	80351828	80415168	-	antisense	HAVANA|ENSEMBL	NA	NA
ENSG00000231625.4	ENSG00000231625	CTD-2104P17.1	14.3319	0.501889	0.188504	2.66248	0.00775671	0.047472	chr17	19615789	19633825	+	transcribed_unprocessed_pseudogene	HAVANA	NA	NA
ENSG00000253456.1	ENSG00000253456	CTD-2363C16.2	33.5739	-0.46622	0.165472	-2.81751	0.00483969	0.0348019	chr5	158985806	158987199	+	antisense	HAVANA	NA	NA
ENSG00000279041.1	ENSG00000279041	CTD-2373N4.3	187.848	0.464365	0.167399	2.774	0.00553709	0.0380956	chr8	30552345	30553766	+	TEC	HAVANA	NA	NA
ENSG00000255182.2	ENSG00000255182	CTD-2517M22.14	59.005	-0.321595	0.110635	-2.90682	0.00365124	0.0289333	chr8	144495458	144505444	-	processed_transcript	HAVANA	NA	NA
ENSG00000274565.1	ENSG00000274565	CTD-3035K23.7	14.0832	0.415953	0.156297	2.6613	0.00778384	0.0475698	chr17	62626437	62627590	-	antisense	HAVANA	NA	NA
ENSG00000077063.10	ENSG00000077063	CTTNBP2	175.299	0.55729	0.152434	3.65594	0.000256238	0.00456771	chr7	117710651	117874139	-	protein_coding	HAVANA	117711540	117873415	ENSP00000160373.3|ENSP00000389576.1|ENSP00000397678.1|ENSP00000389491.1|ENSP00000395925.1|ENSP00000406142.1|ENSP00000396014.1|ENSP00000405831.1|ENSP00000393373.1
ENSG00000112514.15	ENSG00000112514	CUTA	293.399	-0.279707	0.0692113	-4.04135	5.31e-05	0.00153739	chr6	33416442	33418317	-	protein_coding	HAVANA|ENSEMBL	33416628	33418185	ENSP00000363624.5|ENSP00000480360.1|ENSP00000417544.1|ENSP00000475963.1|ENSP00000418659.1|ENSP00000418612.1|ENSP00000417823.1|ENSP00000363608.4|ENSP00000403268.2|ENSP00000363620.3
ENSG00000156234.7	ENSG00000156234	CXCL13	60.3082	-1.76879	0.365858	-4.83463	1.33e-06	0.000115389	chr4	77511753	77611834	+	protein_coding	HAVANA	77605866	77611036	ENSP00000286758.4
ENSG00000145824.12	ENSG00000145824	CXCL14	308.548	-0.909913	0.25792	-3.52788	0.000418896	0.00645304	chr5	135570679	135579279	-	protein_coding	HAVANA|ENSEMBL	135571856	135578814	ENSP00000423783.1|ENSP00000337065.5
ENSG00000171604.11	ENSG00000171604	CXXC5	283.876	-0.311972	0.0848854	-3.67521	0.000237654	0.00433504	chr5	139647299	139683882	+	protein_coding	HAVANA	139680524	139682904	ENSP00000427127.1|ENSP00000422883.1|ENSP00000302543.3|ENSP00000427253.1|ENSP00000425203.1|ENSP00000426124.1|ENSP00000430522.1|ENSP00000427379.1|ENSP00000423365.1|ENSP00000427440.1|ENSP00000424219.1|ENSP00000421057.1|ENSP00000430949.1|ENSP00000421866.1
ENSG00000114395.10	ENSG00000114395	CYB561D2	57.1311	-0.411636	0.105393	-3.90571	9.39e-05	0.00226411	chr3	50350695	50358460	+	protein_coding	HAVANA	50351434	50353741	ENSP00000400454.1|ENSP00000410663.1|ENSP00000232508.5|ENSP00000391209.1
ENSG00000187954.12	ENSG00000187954	CYHR1	410.022	-0.176885	0.0592119	-2.98732	0.00281435	0.0241981	chr8	144449582	144465677	-	protein_coding	HAVANA	144450382	144464901	ENSP00000387426.2|ENSP00000433769.1|ENSP00000434470.1|ENSP00000385962.2|ENSP00000414647.2|ENSP00000304826.5|ENSP00000432902.1|ENSP00000434642.1
ENSG00000083799.17	ENSG00000083799	CYLD	1022.91	-0.271753	0.0907317	-2.99512	0.00274333	0.0237257	chr16	50742050	50801935	+	protein_coding	HAVANA	50749699	50800839	ENSP00000457108.1|ENSP00000457576.1|ENSP00000308928.9|ENSP00000454515.1|ENSP00000462134.1|ENSP00000456912.2|ENSP00000455535.1|ENSP00000381574.2|ENSP00000392025.3|ENSP00000456488.2|ENSP00000463197.1|ENSP00000458507.1
ENSG00000186204.14	ENSG00000186204	CYP4F12	78.824	0.495454	0.168449	2.94127	0.00326872	0.0267897	chr19	15672757	15697174	+	protein_coding	HAVANA	15673225	15697082	ENSP00000448998.1|ENSP00000448560.1|ENSP00000446812.1|ENSP00000449703.1|ENSP00000430849.1|ENSP00000447922.1|ENSP00000321821.9
ENSG00000154198.14	ENSG00000154198	CYP4Z2P	68.7329	1.02218	0.193806	5.27427	1.33e-07	2.37e-05	chr1	46843095	46900437	-	transcribed_unprocessed_pseudogene	HAVANA	NA	NA
ENSG00000196730.12	ENSG00000196730	DAPK1	632.122	-0.433689	0.109635	-3.95574	7.63e-05	0.00198655	chr9	87497228	87708633	+	protein_coding	HAVANA|ENSEMBL	87499078	87707361	ENSP00000350785.5|ENSP00000417076.1|ENSP00000418885.3|ENSP00000386135.3|ENSP00000484267.1|ENSP00000419026.1|ENSP00000417746.1
ENSG00000143164.15	ENSG00000143164	DCAF6	1548.8	-0.301497	0.0992442	-3.03793	0.00238211	0.0215749	chr1	167935783	168075843	+	protein_coding	HAVANA|ENSEMBL	167936912	168075432	ENSP00000396238.2|ENSP00000356817.3|ENSP00000432304.1|ENSP00000311949.6|ENSP00000356814.3
ENSG00000100523.14	ENSG00000100523	DDHD1	616.401	-0.206754	0.0750515	-2.75483	0.00587218	0.0395438	chr14	53036745	53153282	-	protein_coding	HAVANA|ENSEMBL	53046771	53153098	ENSP00000483405.1|ENSP00000378970.1|ENSP00000327104.5|ENSP00000350401.3|ENSP00000450785.1
ENSG00000244038.9	ENSG00000244038	DDOST	728.351	-0.251973	0.0871556	-2.89107	0.00383929	0.0299206	chr1	20651767	20661544	-	protein_coding	HAVANA|ENSEMBL	20652382	20661401	ENSP00000399457.3|ENSP00000473655.1|ENSP00000364188.3|ENSP00000475634.1
ENSG00000183258.11	ENSG00000183258	DDX41	385.325	-0.206602	0.0548304	-3.76802	0.00016455	0.00333383	chr5	177511577	177517469	-	protein_coding	HAVANA|ENSEMBL	177511794	177516945	ENSP00000330349.7|ENSP00000422753.1|ENSP00000421460.1|ENSP00000425739.1|ENSP00000426330.1|ENSP00000486367.1|ENSP00000427082.1|ENSP00000487280.1
ENSG00000105671.11	ENSG00000105671	DDX49	209.707	-0.150928	0.0562929	-2.68112	0.0073377	0.0458298	chr19	18919675	18928633	+	protein_coding	HAVANA|ENSEMBL	18919742	18928313	ENSP00000247003.3|ENSP00000487048.1|ENSP00000470440.1|ENSP00000471292.1|ENSP00000472289.1|ENSP00000472084.1|ENSP00000469086.1
ENSG00000205744.9	ENSG00000205744	DENND1C	271.541	-0.496258	0.125357	-3.95876	7.53e-05	0.00197325	chr19	6467207	6482557	-	protein_coding	HAVANA	6467507	6481695	ENSP00000370889.1|ENSP00000465675.1|ENSP00000437805.1|ENSP00000467008.1|ENSP00000466334.1|ENSP00000466583.1|ENSP00000466394.1
ENSG00000146966.12	ENSG00000146966	DENND2A	199.917	0.4937	0.122023	4.04597	5.21e-05	0.0015156	chr7	140518420	140673993	-	protein_coding	HAVANA|ENSEMBL	140518710	140602397	ENSP00000275884.6|ENSP00000442245.1|ENSP00000417673.1|ENSP00000419654.1|ENSP00000420145.1|ENSP00000419464.1|ENSP00000420605.1|ENSP00000418844.1|ENSP00000418088.1|ENSP00000418760.1
ENSG00000175984.14	ENSG00000175984	DENND2C	125.586	0.433497	0.0941978	4.60198	4.18e-06	0.000257778	chr1	114582848	114670422	-	protein_coding	HAVANA|ENSEMBL	114585603	114625984	ENSP00000376957.3|ENSP00000376955.1|ENSP00000376958.2
ENSG00000170456.14	ENSG00000170456	DENND5B	334.573	-0.335923	0.112332	-2.99045	0.00278569	0.0240077	chr12	31382223	31591097	-	protein_coding	HAVANA|ENSEMBL	31387606	31590832	ENSP00000486530.1|ENSP00000373734.5|ENSP00000444889.1|ENSP00000346238.4|ENSP00000442938.1|ENSP00000445113.1
ENSG00000077044.9	ENSG00000077044	DGKD	1221.21	-0.317781	0.0728215	-4.36383	1.28e-05	0.000561854	chr2	233354507	233472104	+	protein_coding	HAVANA|ENSEMBL	233354519	233469457	ENSP00000264057.2|ENSP00000407938.1|ENSP00000485047.1|ENSP00000395530.1|ENSP00000386455.3|ENSP00000479051.1|ENSP00000390970.1
ENSG00000107984.9	ENSG00000107984	DKK1	25.9003	0.845042	0.236314	3.57593	0.00034899	0.00570137	chr10	52314296	52318042	+	protein_coding	HAVANA	52314435	52316804	ENSP00000363081.3
ENSG00000161249.20	ENSG00000161249	DMKN	151.967	0.633817	0.187017	3.38908	0.000701269	0.00918619	chr19	35497220	35513658	-	protein_coding	HAVANA	35497499	35513475	ENSP00000386225.2|ENSP00000473734.1|ENSP00000388378.1|ENSP00000384509.2|ENSP00000470881.1|ENSP00000342012.3|ENSP00000470033.1|ENSP00000470425.1|ENSP00000412075.1|ENSP00000470510.1|ENSP00000392222.2|ENSP00000472349.1|ENSP00000471112.1|ENSP00000405503.1|ENSP00000391036.1|ENSP00000406864.1|ENSP00000474491.1|ENSP00000473341.2|ENSP00000471968.2|ENSP00000471487.2|ENSP00000473526.1|ENSP00000474419.1|ENS…
ENSG00000077232.16	ENSG00000077232	DNAJC10	1942.57	-0.33981	0.0846941	-4.0122	6.02e-05	0.00167454	chr2	182716041	182794464	+	protein_coding	HAVANA|ENSEMBL	182718087	182777129	ENSP00000479930.1|ENSP00000264065.6|ENSP00000441560.1|ENSP00000481044.1|ENSP00000389483.1|ENSP00000400096.1
ENSG00000013563.13	ENSG00000013563	DNASE1L1	107.187	-0.264197	0.0796957	-3.31507	0.000916207	0.0111478	chrX	154401238	154412112	-	protein_coding	HAVANA|ENSEMBL	154402710	154405568	ENSP00000358824.1|ENSP00000377255.1|ENSP00000358822.1|ENSP00000358823.3|ENSP00000014935.3|ENSP00000309168.5|ENSP00000395591.1|ENSP00000393346.1|ENSP00000416881.1|ENSP00000393000.1|ENSP00000410281.1
ENSG00000167130.17	ENSG00000167130	DOLPP1	112.132	-0.229111	0.0828828	-2.76427	0.00570501	0.0388125	chr9	129081100	129090438	+	protein_coding	HAVANA	129081132	129089004	ENSP00000361625.4|ENSP00000384043.3|ENSP00000333294.8|ENSP00000403278.1
ENSG00000134762.16	ENSG00000134762	DSC3	173.124	0.996898	0.220668	4.51764	6.25e-06	0.000342963	chr18	30990008	31042815	-	protein_coding	HAVANA|ENSEMBL	30994178	31042660	ENSP00000353608.4|ENSP00000392068.1|ENSP00000464283.1
ENSG00000151914.18	ENSG00000151914	DST	7393.3	0.365033	0.124694	2.92744	0.00341766	0.0276541	chr6	56457987	56954628	-	protein_coding	HAVANA|ENSEMBL	56459008	56954587	ENSP00000244364.6|ENSP00000400883.3|ENSP00000307959.7|ENSP00000359790.6|ENSP00000359824.2|ENSP00000431020.1|ENSP00000354508.3|ENSP00000430472.1|ENSP00000489032.1|ENSP00000489111.1|ENSP00000431121.1|ENSP00000404924.1|ENSP00000431030.1|ENSP00000359801.6|ENSP00000428068.1|ENSP00000431003.1|ENSP00000393082.2|ENSP00000488192.1|ENSP00000429075.1|ENSP00000429221.1
ENSG00000206195.10	ENSG00000206195	DUXAP8	140.333	-1.30338	0.293203	-4.44531	8.78e-06	0.000432852	chr22	15784959	15829984	+	processed_transcript	HAVANA	NA	NA
ENSG00000105204.13	ENSG00000105204	DYRK1B	176.48	-0.171944	0.0638179	-2.69428	0.00705402	0.0447202	chr19	39825350	39834201	-	protein_coding	HAVANA|ENSEMBL	39825718	39831867	ENSP00000469863.1|ENSP00000312789.4|ENSP00000221803.4|ENSP00000472941.1|ENSP00000403182.1|ENSP00000471609.1|ENSP00000472861.1
ENSG00000134874.17	ENSG00000134874	DZIP1	331.322	0.481441	0.135149	3.5623	0.000367622	0.00592111	chr13	95578202	95644703	-	protein_coding	HAVANA|ENSEMBL	95582237	95642029	ENSP00000355175.2|ENSP00000257312.5|ENSP00000355018.3|ENSP00000366025.2|ENSP00000431168.1
ENSG00000158163.14	ENSG00000158163	DZIP1L	183.738	0.457998	0.108158	4.23451	2.29e-05	0.000834186	chr3	138061990	138115818	-	protein_coding	HAVANA	138062819	138103971	ENSP00000332148.2|ENSP00000417228.1|ENSP00000419486.1|ENSP00000420600.1|ENSP00000420051.1
ENSG00000034239.10	ENSG00000034239	EFCAB1	57.9425	0.70104	0.194453	3.60518	0.000311932	0.00524891	chr8	48710789	48735311	-	protein_coding	HAVANA|ENSEMBL	48724745	48735151	ENSP00000429644.1|ENSP00000400873.1|ENSP00000430374.1|ENSP00000262103.3|ENSP00000430940.1|ENSP00000430765.1
ENSG00000183690.12	ENSG00000183690	EFHC2	39.9461	0.46718	0.132602	3.52316	0.000426432	0.00652826	chrX	44147882	44343672	-	protein_coding	HAVANA	44148798	44343588	ENSP00000404232.2
ENSG00000164318.17	ENSG00000164318	EGFLAM	152.85	0.493632	0.123436	3.9991	6.36e-05	0.00174624	chr5	38258409	38465021	+	protein_coding	HAVANA	38258755	38463983	ENSP00000346964.3|ENSP00000313084.5|ENSP00000426437.1|ENSP00000337607.6|ENSP00000380385.2|ENSP00000380393.3|ENSP00000425579.1|ENSP00000427228.1|ENSP00000423228.1
ENSG00000086232.12	ENSG00000086232	EIF2AK1	1355.35	-0.438017	0.114905	-3.812	0.000137849	0.00297	chr7	6022244	6059230	-	protein_coding	HAVANA	6023744	6059083	ENSP00000199389.6|ENSP00000392734.1|ENSP00000392459.1|ENSP00000397590.1
ENSG00000126767.17	ENSG00000126767	ELK1	241.838	-0.192856	0.0669247	-2.88168	0.00395561	0.0304317	chrX	47635521	47650604	-	protein_coding	HAVANA	47636832	47641441	ENSP00000247161.3|ENSP00000366182.3|ENSP00000345585.4
ENSG00000145293.14	ENSG00000145293	ENOPH1	294.726	-0.248312	0.0721533	-3.44144	0.00057862	0.00802835	chr4	82430562	82461091	+	protein_coding	HAVANA|ENSEMBL	82430830	82460117	ENSP00000273920.3|ENSP00000477863.2|ENSP00000422005.1|ENSP00000427209.1|ENSP00000483615.1
ENSG00000112796.9	ENSG00000112796	ENPP5	390.093	-0.526295	0.194538	-2.70536	0.00682306	0.0436749	chr6	46159187	46170971	-	protein_coding	HAVANA	46161329	46168262	ENSP00000360436.1|ENSP00000230565.3
ENSG00000250942.1	ENSG00000250942	ENPP7P11	10.1933	0.720558	0.197516	3.64811	0.00026418	0.00467463	chr4	9677308	9677934	+	processed_pseudogene	HAVANA	NA	NA
ENSG00000163378.13	ENSG00000163378	EOGT	364.723	0.478774	0.127096	3.76704	0.000165196	0.00333929	chr3	68975214	69013961	-	protein_coding	HAVANA|ENSEMBL	68976712	69009846	ENSP00000373206.3|ENSP00000295571.5|ENSP00000480083.1|ENSP00000384124.2|ENSP00000443780.2|ENSP00000444264.2|ENSP00000408090.1|ENSP00000411832.1
ENSG00000135333.13	ENSG00000135333	EPHA7	325.178	0.759596	0.213562	3.5568	0.000375398	0.0060065	chr6	93240020	93419547	-	protein_coding	HAVANA	93243429	93419341	ENSP00000358309.4|ENSP00000358303.1
ENSG00000164308.16	ENSG00000164308	ERAP2	457.651	-0.498083	0.176096	-2.82847	0.0046771	0.0340586	chr5	96875939	96919716	+	protein_coding	HAVANA	96879686	96917602	ENSP00000400376.3|ENSP00000421175.1|ENSP00000421849.1|ENSP00000369235.4|ENSP00000425758.1|ENSP00000426655.1|ENSP00000427573.1|ENSP00000425415.1
ENSG00000125991.18	ENSG00000125991	ERGIC3	840.778	-0.221668	0.0726121	-3.05277	0.00226739	0.0208293	chr20	35542021	35557634	+	protein_coding	HAVANA	35542098	35557501	ENSP00000341358.2|ENSP00000349970.4|ENSP00000389398.1|ENSP00000399124.1|ENSP00000414490.1|ENSP00000402480.1|ENSP00000408840.1|ENSP00000416402.1
ENSG00000112319.17	ENSG00000112319	EYA4	262.443	0.753285	0.197929	3.80584	0.000141324	0.00301119	chr6	133240598	133532120	+	protein_coding	HAVANA|ENSEMBL	133274781	133531223	ENSP00000395916.2|ENSP00000388670.2|ENSP00000356870.5|ENSP00000347294.3|ENSP00000347434.6|ENSP00000432770.1|ENSP00000433219.1|ENSP00000404558.2
ENSG00000126218.11	ENSG00000126218	F10	67.2865	0.526852	0.13323	3.95444	7.67e-05	0.00199386	chr13	113122814	113149529	+	protein_coding	HAVANA	113122856	113149514	ENSP00000387092.1|ENSP00000364701.3|ENSP00000364709.3|ENSP00000386320.2
ENSG00000138439.11	ENSG00000138439	FAM117B	659.563	-0.565254	0.146364	-3.86197	0.000112478	0.00256647	chr2	202635188	202769757	+	protein_coding	HAVANA	202635188	202765761	ENSP00000376071.2
ENSG00000103254.9	ENSG00000103254	FAM173A	65.5308	-0.299305	0.0834444	-3.58688	0.000334662	0.00552226	chr16	720581	722601	+	protein_coding	HAVANA	721275	722554	ENSP00000454380.1|ENSP00000455283.1|ENSP00000219535.3|ENSP00000455962.1
ENSG00000111879.18	ENSG00000111879	FAM184A	181.038	0.299481	0.102851	2.91179	0.00359368	0.0286362	chr6	118959763	119149387	-	protein_coding	HAVANA|ENSEMBL	118960106	119078299	ENSP00000429151.1|ENSP00000430643.1|ENSP00000484827.1|ENSP00000342604.7|ENSP00000429306.1|ENSP00000429080.1|ENSP00000326608.6|ENSP00000484054.1|ENSP00000357460.4|ENSP00000357457.2|ENSP00000430442.1|ENSP00000429826.1|ENSP00000403472.2
ENSG00000197852.9	ENSG00000197852	FAM212B	177.437	0.314546	0.093741	3.35548	0.000792278	0.0100634	chr1	111680630	111755824	-	protein_coding	HAVANA	111723105	111755712	ENSP00000349805.5|ENSP00000436075.1|ENSP00000408238.2|ENSP00000437205.1
ENSG00000203778.7	ENSG00000203778	FAM229B	63.2863	0.324818	0.107284	3.02766	0.00246459	0.0220982	chr6	112087599	112102790	+	protein_coding	HAVANA	112099284	112100784	ENSP00000357645.2|ENSP00000474987.1
ENSG00000111913.15	ENSG00000111913	FAM65B	483.09	-1.19852	0.242099	-4.95054	7.4e-07	7.42e-05	chr6	24804282	25042168	-	protein_coding	HAVANA|ENSEMBL	24806376	25041926	ENSP00000441138.1|ENSP00000482957.1|ENSP00000259698.4|ENSP00000367262.4|ENSP00000438425.1|ENSP00000441305.1|ENSP00000477857.1
ENSG00000168143.8	ENSG00000168143	FAM83B	39.6817	1.26534	0.222036	5.69881	1.21e-08	4.49e-06	chr6	54846771	54942022	+	protein_coding	HAVANA	54870247	54942004	ENSP00000304078.7
ENSG00000182118.5	ENSG00000182118	FAM89A	43.3012	0.36472	0.108127	3.37308	0.000743334	0.00960588	chr1	231018958	231040246	-	protein_coding	HAVANA	231019866	231040211	ENSP00000355614.4
ENSG00000169710.7	ENSG00000169710	FASN	7437.98	-0.766226	0.209367	-3.65972	0.000252494	0.00452558	chr17	82078333	82098332	-	protein_coding	HAVANA	82079146	82096445	ENSP00000304592.2|ENSP00000488964.1|ENSP00000462949.1|ENSP00000489514.1
ENSG00000164896.19	ENSG00000164896	FASTK	291.636	-0.379579	0.0840911	-4.5139	6.36e-06	0.000347574	chr7	151076593	151080866	-	protein_coding	HAVANA|ENSEMBL	151076728	151080766	ENSP00000444498.2|ENSP00000324817.6|ENSP00000297532.6|ENSP00000418516.1
ENSG00000138399.17	ENSG00000138399	FASTKD1	146.931	-0.333445	0.0590314	-5.6486	1.62e-08	5.27e-06	chr2	169529749	169573875	-	protein_coding	HAVANA	169529828	169572029	ENSP00000400513.2|ENSP00000403229.2|ENSP00000408667.1|ENSP00000396769.1|ENSP00000399551.1
ENSG00000196159.11	ENSG00000196159	FAT4	813.908	0.455124	0.14933	3.04778	0.00230538	0.0210695	chr4	125316399	125492932	+	protein_coding	HAVANA	125316412	125491765	ENSP00000377862.3|ENSP00000335169.5
ENSG00000165140.9	ENSG00000165140	FBP1	229.764	-0.373804	0.137963	-2.70945	0.00673945	0.0433716	chr9	94603133	94640249	-	protein_coding	HAVANA|ENSEMBL	94603384	94639310	ENSP00000364475.4|ENSP00000408025.1|ENSP00000411619.1
ENSG00000268388.5	ENSG00000268388	FENDRR	262.167	1.21149	0.230027	5.26674	1.39e-07	2.43e-05	chr16	86474529	86509099	-	lincRNA	HAVANA	NA	NA
ENSG00000073712.14	ENSG00000073712	FERMT2	785.627	0.41296	0.142914	2.88956	0.00385778	0.0299907	chr14	52857268	52952435	-	protein_coding	HAVANA|ENSEMBL	52858380	52950568	ENSP00000378993.2|ENSP00000340391.3|ENSP00000450741.1|ENSP00000342858.4|ENSP00000489609.1|ENSP00000451084.1|ENSP00000451134.1|ENSP00000382243.3|ENSP00000451268.1|ENSP00000452472.1|ENSP00000450506.1|ENSP00000451085.1
ENSG00000138685.12	ENSG00000138685	FGF2	197.98	0.595531	0.149718	3.97769	6.96e-05	0.00187465	chr4	122826708	122898236	+	protein_coding	HAVANA|ENSEMBL	122826776	122892393	ENSP00000478620.1|ENSP00000264498.3|ENSP00000477134.1
ENSG00000066468.20	ENSG00000066468	FGFR2	394.629	0.987473	0.179257	5.50869	3.62e-08	8.94e-06	chr10	121478334	121598458	-	protein_coding	HAVANA|ENSEMBL	121479584	121593817	ENSP00000358057.4|ENSP00000350166.5|ENSP00000484154.1|ENSP00000351276.5|ENSP00000474011.1|ENSP00000348559.4|ENSP00000358056.4|ENSP00000474109.1|ENSP00000358055.1|ENSP00000404219.1|ENSP00000263451.5|ENSP00000309878.9|ENSP00000410294.2|ENSP00000353262.3|ENSP00000358052.1|ENSP00000358054.3|ENSP00000337665.6|ENSP00000352309.2|ENSP00000481464.1|ENSP00000484892.1
ENSG00000127418.14	ENSG00000127418	FGFRL1	1057.51	-0.953562	0.242523	-3.93184	8.43e-05	0.00210917	chr4	1009936	1026897	+	protein_coding	HAVANA|ENSEMBL	1012486	1025344	ENSP00000381498.2|ENSP00000425025.1|ENSP00000423091.1|ENSP00000426740.1|ENSP00000424037.1|ENSP00000264748.6
ENSG00000136068.14	ENSG00000136068	FLNB	7640.93	-0.432612	0.135778	-3.18616	0.00144174	0.0153052	chr3	58008400	58172251	+	protein_coding	HAVANA|ENSEMBL	58008565	58170859	ENSP00000420213.1|ENSP00000295956.4|ENSP00000351339.3|ENSP00000415599.2|ENSP00000418510.1|ENSP00000420199.1|ENSP00000419954.1|ENSP00000414532.3
ENSG00000100350.14	ENSG00000100350	FOXRED2	313.596	-0.252045	0.0905198	-2.78442	0.00536235	0.0373127	chr22	36487190	36507101	-	protein_coding	HAVANA	36490011	36506422	ENSP00000380401.4|ENSP00000216187.6|ENSP00000380400.4|ENSP00000409692.1
ENSG00000139926.15	ENSG00000139926	FRMD6	550.14	0.553072	0.144529	3.82672	0.000129863	0.00284305	chr14	51489100	51730727	+	protein_coding	HAVANA	51689837	51728026	ENSP00000348550.4|ENSP00000379068.2|ENSP00000343899.5|ENSP00000452122.1|ENSP00000451453.1|ENSP00000451977.1|ENSP00000450667.1|ENSP00000451157.1|ENSP00000450735.1|ENSP00000452529.1
ENSG00000273888.1	ENSG00000273888	FRMD6-AS1	27.7662	0.359315	0.123566	2.90788	0.00363883	0.0288921	chr14	51649516	51651744	-	antisense	HAVANA	NA	NA
ENSG00000258537.5	ENSG00000258537	FRMD6-AS2	12.7703	0.851942	0.182188	4.67617	2.92e-06	0.00020101	chr14	51454512	51599952	-	lincRNA	HAVANA	NA	NA
ENSG00000179163.11	ENSG00000179163	FUCA1	385.344	-0.347703	0.102351	-3.39717	0.000680867	0.00900338	chr1	23845077	23868294	-	protein_coding	HAVANA	23845718	23868286	ENSP00000363603.3
ENSG00000172728.15	ENSG00000172728	FUT10	126.814	0.315062	0.0809541	3.89187	9.95e-05	0.00235345	chr8	33370824	33473422	-	protein_coding	HAVANA	33372580	33461452	ENSP00000332757.5|ENSP00000430428.1|ENSP00000429870.1
ENSG00000137726.16	ENSG00000137726	FXYD6	91.3255	0.451405	0.159478	2.83052	0.00464729	0.0339397	chr11	117836976	117877486	-	protein_coding	HAVANA|ENSEMBL	117838226	117842776	ENSP00000442756.1|ENSP00000260282.4|ENSP00000431446.1|ENSP00000433312.1|ENSP00000431427.1|ENSP00000463160.1|ENSP00000436629.2|ENSP00000463158.1|ENSP00000431913.1|ENSP00000464144.1
ENSG00000177283.5	ENSG00000177283	FZD8	91.2427	-0.351834	0.110451	-3.18545	0.00144531	0.0153114	chr10	35638249	35642278	-	protein_coding	HAVANA	35639348	35641429	ENSP00000363826.1
ENSG00000166206.13	ENSG00000166206	GABRB3	317.062	-0.536307	0.190112	-2.821	0.0047874	0.0345337	chr15	26543546	26939539	-	protein_coding	HAVANA|ENSEMBL	26547796	26939436	ENSP00000486819.1|ENSP00000308725.5|ENSP00000481004.1|ENSP00000442408.2|ENSP00000299267.4|ENSP00000383049.3|ENSP00000452041.1|ENSP00000439169.1|ENSP00000451077.1|ENSP00000452159.1
ENSG00000179271.2	ENSG00000179271	GADD45GIP1	214.67	-0.203796	0.0621507	-3.27907	0.0010415	0.0122217	chr19	12953119	12957236	-	protein_coding	HAVANA	12954211	12957212	ENSP00000323065.1
ENSG00000144278.14	ENSG00000144278	GALNT13	70.0319	0.623281	0.217857	2.86096	0.00422362	0.0318075	chr2	153871913	154453849	+	protein_coding	HAVANA	153944498	154450548	ENSP00000376570.3|ENSP00000414403.1|ENSP00000387239.1|ENSP00000389447.1|ENSP00000406237.1|ENSP00000391469.1|ENSP00000396612.1
ENSG00000106105.13	ENSG00000106105	GARS	567.378	-0.342547	0.0904057	-3.789	0.000151257	0.00314213	chr7	30594681	30634033	+	protein_coding	HAVANA|ENSEMBL	30594922	30633857	ENSP00000373918.3|ENSP00000485931.1|ENSP00000392677.1|ENSP00000415447.1
ENSG00000167491.17	ENSG00000167491	GATAD2A	771.92	-0.243843	0.0587628	-4.14962	3.33e-05	0.00109336	chr19	19385826	19508931	+	protein_coding	HAVANA|ENSEMBL	19465346	19505471	ENSP00000477171.1|ENSP00000353463.3|ENSP00000476500.1|ENSP00000403703.1|ENSP00000404212.2|ENSP00000390495.1|ENSP00000384899.2|ENSP00000414252.1|ENSP00000351552.3|ENSP00000407293.1|ENSP00000411869.4
ENSG00000225492.6	ENSG00000225492	GBP1P1	30.6588	0.479238	0.165076	2.90313	0.00369449	0.02912	chr1	89407679	89426243	+	transcribed_unprocessed_pseudogene	HAVANA	NA	NA
ENSG00000145723.16	ENSG00000145723	GIN1	87.4816	-0.194219	0.0678769	-2.86134	0.0042186	0.0317751	chr5	103086000	103120151	-	protein_coding	HAVANA	103087901	103108707	ENSP00000422960.1|ENSP00000381970.2|ENSP00000427162.1|ENSP00000423031.1
ENSG00000152661.7	ENSG00000152661	GJA1	600.965	0.588425	0.184093	3.19635	0.00139178	0.0149251	chr6	121435692	121449727	+	protein_coding	HAVANA	121446848	121447993	ENSP00000282561.3
ENSG00000175066.15	ENSG00000175066	GK5	1518.69	0.281526	0.101348	2.77782	0.00547247	0.037796	chr3	142157527	142225607	-	protein_coding	HAVANA	142165625	142225455	ENSP00000418001.1|ENSP00000420312.1|ENSP00000419031.1|ENSP00000417153.1|ENSP00000420593.1|ENSP00000418239.1
ENSG00000106571.12	ENSG00000106571	GLI3	414.748	0.543865	0.137079	3.96753	7.26e-05	0.00192827	chr7	41960950	42237870	-	protein_coding	HAVANA	41964333	42223253	ENSP00000379258.3|ENSP00000406135.1|ENSP00000407963.1
ENSG00000174332.5	ENSG00000174332	GLIS1	103.58	0.927172	0.206453	4.49095	7.09e-06	0.000374294	chr1	53506237	53738106	-	protein_coding	HAVANA	53506622	53738064	ENSP00000309653.2|ENSP00000486112.1
ENSG00000173540.12	ENSG00000173540	GMPPB	262.095	-0.218261	0.0827568	-2.63737	0.00835506	0.049783	chr3	49716844	49723951	-	protein_coding	HAVANA	49721755	49723726	ENSP00000418565.1|ENSP00000309092.6|ENSP00000311130.6
ENSG00000172354.9	ENSG00000172354	GNB2	818.841	-0.368146	0.111334	-3.30667	0.000944137	0.0114061	chr7	100673531	100679174	+	protein_coding	HAVANA	100676266	100678798	ENSP00000305260.4|ENSP00000399904.1|ENSP00000401873.1|ENSP00000389391.1|ENSP00000390543.1|ENSP00000400286.1|ENSP00000377503.1|ENSP00000390077.1|ENSP00000413219.1|ENSP00000377501.1
ENSG00000100522.8	ENSG00000100522	GNPNAT1	244.482	-0.293204	0.105805	-2.77118	0.0055853	0.0383396	chr14	52775194	52791668	-	protein_coding	HAVANA	52778314	52784650	ENSP00000216410.3|ENSP00000452310.1|ENSP00000452032.1
ENSG00000197858.10	ENSG00000197858	GPAA1	275.809	-0.26379	0.0783951	-3.36488	0.000765771	0.00981628	chr8	144082590	144086216	+	protein_coding	HAVANA	144082731	144086122	ENSP00000435024.1|ENSP00000347206.4|ENSP00000434485.2|ENSP00000431233.1|ENSP00000354316.6|ENSP00000434544.1|ENSP00000435119.1|ENSP00000435132.1
ENSG00000143147.14	ENSG00000143147	GPR161	429.325	0.713167	0.131743	5.41334	6.19e-08	1.35e-05	chr1	168079543	168137667	-	protein_coding	HAVANA|ENSEMBL	168085534	168137421	ENSP00000437576.1|ENSP00000444348.1|ENSP00000271357.6|ENSP00000441039.1|ENSP00000356812.1|ENSP00000356810.1|ENSP00000356809.1
ENSG00000167701.13	ENSG00000167701	GPT	114.151	-0.415269	0.118516	-3.5039	0.000458496	0.0068533	chr8	144502973	144507174	+	protein_coding	HAVANA|ENSEMBL	144504305	144506997	ENSP00000433586.1|ENSP00000378408.2
ENSG00000233276.3	ENSG00000233276	GPX1	300.403	-0.252543	0.0876954	-2.87977	0.00397965	0.0305468	chr3	49357176	49358600	-	protein_coding	HAVANA|ENSEMBL	49357391	49358278	ENSP00000407375.1|ENSP00000391316.1|ENSP00000478837.1
ENSG00000167468.16	ENSG00000167468	GPX4	835.083	-0.295723	0.0835869	-3.53791	0.00040331	0.0062873	chr19	1103926	1106791	+	protein_coding	HAVANA|ENSEMBL	1104044	1106776	ENSP00000485000.1|ENSP00000346103.7|ENSP00000466872.2|ENSP00000483655.1|ENSP00000465828.3|ENSP00000464989.3|ENSP00000473614.2|ENSP00000477503.1|ENSP00000484697.1|ENSP00000468349.1|ENSP00000467900.1
ENSG00000198785.4	ENSG00000198785	GRIN3A	343.902	-2.09687	0.302125	-6.9404	3.91e-12	1.57e-08	chr9	101569353	101738580	-	protein_coding	HAVANA	101573177	101737979	ENSP00000355155.3
ENSG00000030582.16	ENSG00000030582	GRN	849.06	-0.421093	0.0979353	-4.29971	1.71e-05	0.000681969	chr17	44345086	44353102	+	protein_coding	HAVANA	44349165	44352795	ENSP00000053867.2|ENSP00000466956.1|ENSP00000466271.1|ENSP00000465518.1|ENSP00000465375.1|ENSP00000466405.1|ENSP00000467745.1|ENSP00000467022.1|ENSP00000467870.1|ENSP00000467431.1|ENSP00000466611.1|ENSP00000467616.1|ENSP00000468318.1|ENSP00000465673.1|ENSP00000467837.1
ENSG00000213366.12	ENSG00000213366	GSTM2	350.726	0.70277	0.163767	4.29128	1.78e-05	0.000696271	chr1	109668022	109709551	+	protein_coding	HAVANA|ENSEMBL	109668116	109708573	ENSP00000416883.1|ENSP00000358846.2|ENSP00000358842.4|ENSP00000435910.2|ENSP00000241337.4|ENSP00000435157.2|ENSP00000404662.2|ENSP00000358844.2
ENSG00000134201.10	ENSG00000134201	GSTM5	120.879	0.754918	0.177182	4.26069	2.04e-05	0.000774764	chr1	109712255	109775428	+	protein_coding	HAVANA|ENSEMBL	109712313	109717423	ENSP00000256593.3|ENSP00000358828.1|ENSP00000358827.5
ENSG00000122034.12	ENSG00000122034	GTF3A	326.913	-0.351362	0.0712799	-4.92933	8.25e-07	8.08e-05	chr13	27424544	27435823	+	protein_coding	HAVANA|ENSEMBL	27424563	27435594	ENSP00000393050.2|ENSP00000370532.4|ENSP00000409175.1|ENSP00000389655.1|ENSP00000387806.1
ENSG00000164116.16	ENSG00000164116	GUCY1A3	1518.64	-0.390708	0.143005	-2.73213	0.00629261	0.0415075	chr4	155666711	155732349	+	protein_coding	HAVANA|ENSEMBL	155696868	155730228	ENSP00000424361.1|ENSP00000479710.1|ENSP00000421493.1|ENSP00000426968.1|ENSP00000412201.2|ENSP00000424863.1|ENSP00000409903.2|ENSP00000377418.3|ENSP00000296518.7|ENSP00000422141.1|ENSP00000426040.1
ENSG00000184897.5	ENSG00000184897	H1FX	246.843	-0.222879	0.0811774	-2.74558	0.00604033	0.040356	chr3	129314771	129316277	-	protein_coding	HAVANA	129315264	129315902	ENSP00000329662.4
ENSG00000163041.9	ENSG00000163041	H3F3A	602.344	-0.301543	0.063443	-4.75297	2e-06	0.000151238	chr1	226061851	226072001	+	protein_coding	HAVANA	226064352	226071476	ENSP00000355781.1|ENSP00000355780.3|ENSP00000355779.3|ENSP00000355778.1
ENSG00000165996.13	ENSG00000165996	HACD1	66.1242	0.583432	0.14119	4.13226	3.59e-05	0.00115621	chr10	17589032	17617377	-	protein_coding	HAVANA	17590367	17617339	ENSP00000355308.3|ENSP00000462868.1|ENSP00000462336.1|ENSP00000322923.6
ENSG00000206527.9	ENSG00000206527	HACD2	799.007	-0.397941	0.129505	-3.07278	0.00212075	0.0199296	chr3	123490820	123585185	-	protein_coding	HAVANA	123494891	123585027	ENSP00000373153.5|ENSP00000417567.1|ENSP00000419237.1
ENSG00000170961.6	ENSG00000170961	HAS2	39.9226	0.545486	0.17181	3.17494	0.00149866	0.0156913	chr8	121612116	121641390	-	protein_coding	HAVANA	121614112	121629340	ENSP00000306991.4
ENSG00000051620.10	ENSG00000051620	HEBP2	1460.29	-0.297436	0.110955	-2.68069	0.00734695	0.0458682	chr6	138403531	138422197	+	protein_coding	HAVANA	138403564	138413075	ENSP00000392101.1|ENSP00000475750.1|ENSP00000356670.3|ENSP00000395958.1
ENSG00000235173.6	ENSG00000235173	HGH1	122.981	-0.20475	0.0730423	-2.80317	0.00506024	0.0358753	chr8	144137769	144140843	+	protein_coding	HAVANA|ENSEMBL	144137836	144139549	ENSP00000321320.5|ENSP00000431970.1|ENSP00000486087.1
ENSG00000064393.15	ENSG00000064393	HIPK2	6006.59	-0.389078	0.138579	-2.80763	0.00499082	0.0354911	chr7	139561570	139777778	-	protein_coding	HAVANA|ENSEMBL	139572930	139777623	ENSP00000385571.3|ENSP00000413724.2|ENSP00000343108.7
ENSG00000184357.4	ENSG00000184357	HIST1H1B	86.9473	-1.58952	0.274171	-5.79756	6.73e-09	2.89e-06	chr6	27866849	27867529	-	protein_coding	HAVANA	27866852	27867529	ENSP00000330074.3
ENSG00000197903.7	ENSG00000197903	HIST1H2BK	233.515	-0.558128	0.0983695	-5.67379	1.4e-08	4.85e-06	chr6	27146418	27146798	-	protein_coding	HAVANA	27146421	27146798	ENSP00000349430.1
ENSG00000274267.1	ENSG00000274267	HIST1H3B	87.0391	-1.30594	0.224132	-5.82663	5.66e-09	2.53e-06	chr6	26031650	26032060	-	protein_coding	HAVANA	26031653	26032060	ENSP00000484841.1
ENSG00000158406.4	ENSG00000158406	HIST1H4H	252.834	-0.594575	0.124814	-4.76368	1.9e-06	0.000146164	chr6	26277609	26285638	-	protein_coding	HAVANA|ENSEMBL	26285191	26285499	ENSP00000489567.1|ENSP00000489319.1|ENSP00000489236.1|ENSP00000366956.1
ENSG00000276180.1	ENSG00000276180	HIST1H4I	90.801	-0.741695	0.162181	-4.57327	4.8e-06	0.000283553	chr6	27138588	27139881	+	protein_coding	HAVANA	27139309	27139617	ENSP00000481486.1
ENSG00000146151.12	ENSG00000146151	HMGCLL1	42.2031	0.712563	0.199517	3.57144	0.000355029	0.00577872	chr6	55434369	55579214	-	protein_coding	HAVANA	55435665	55579055	ENSP00000274901.4|ENSP00000381654.2|ENSP00000359889.2|ENSP00000359887.2|ENSP00000424309.1|ENSP00000309737.4|ENSP00000412924.1|ENSP00000426054.1
ENSG00000179362.14	ENSG00000179362	HMGN2P46	1547.34	-0.852942	0.28609	-2.98137	0.00286962	0.0245021	chr15	45511136	45586290	+	transcribed_processed_pseudogene	HAVANA	NA	NA
ENSG00000240990.9	ENSG00000240990	HOXA11-AS	80.3302	-0.532123	0.174094	-3.05654	0.00223911	0.0206844	chr7	27184518	27189293	+	antisense	HAVANA	NA	NA
ENSG00000128713.12	ENSG00000128713	HOXD11	23.8015	0.81518	0.187651	4.34413	1.4e-05	0.000600686	chr2	176104216	176109754	+	protein_coding	HAVANA|ENSEMBL	176107356	176109139	ENSP00000249504.5|ENSP00000480304.1
ENSG00000128714.5	ENSG00000128714	HOXD13	61.044	0.569003	0.188759	3.01444	0.00257458	0.0227591	chr2	176092891	176095938	+	protein_coding	HAVANA	176092891	176094727	ENSP00000376322.3
ENSG00000153976.2	ENSG00000153976	HS3ST3A1	46.5947	0.429299	0.156995	2.73447	0.00624799	0.0413134	chr17	13495689	13601927	-	protein_coding	HAVANA	13496200	13601129	ENSP00000284110.1|ENSP00000462696.1
ENSG00000171004.17	ENSG00000171004	HS6ST2	37.9456	0.684756	0.207776	3.29564	0.000981973	0.0117415	chrX	132626016	132961395	-	protein_coding	HAVANA|ENSEMBL	132628226	132958602	ENSP00000359873.2|ENSP00000429473.1|ENSP00000359870.3|ENSP00000384013.4
ENSG00000117594.9	ENSG00000117594	HSD11B1	69.1186	0.661917	0.205188	3.22591	0.00125574	0.0139177	chr1	209686178	209734950	+	protein_coding	HAVANA|ENSEMBL	209704943	209734518	ENSP00000478430.1|ENSP00000355995.1|ENSP00000261465.2|ENSP00000355994.3
ENSG00000164070.11	ENSG00000164070	HSPA4L	219.711	0.378672	0.134088	2.82405	0.00474212	0.0343386	chr4	127781821	127840733	+	protein_coding	HAVANA	127782551	127832871	ENSP00000422482.1|ENSP00000296464.3|ENSP00000427305.1|ENSP00000425645.1
ENSG00000283122.1	ENSG00000283122	HYMAI	35.0408	0.56641	0.117734	4.81095	1.5e-06	0.000124123	chr6	144004916	144008262	-	non_coding	HAVANA	NA	NA
ENSG00000149428.18	ENSG00000149428	HYOU1	1715.55	-0.312729	0.1105	-2.83011	0.00465317	0.0339625	chr11	119044189	119057202	-	protein_coding	HAVANA|ENSEMBL	119045117	119056160	ENSP00000480150.1|ENSP00000480248.1|ENSP00000482199.1|ENSP00000483106.1|ENSP00000467866.2|ENSP00000484186.1|ENSP00000442727.2|ENSP00000431874.1|ENSP00000462951.1|ENSP00000463318.1|ENSP00000464026.1|ENSP00000463515.1|ENSP00000463742.2|ENSP00000479845.1|ENSP00000484622.1
ENSG00000003147.17	ENSG00000003147	ICA1	820.693	-0.399302	0.14515	-2.75096	0.00594215	0.0398926	chr7	8113184	8262687	-	protein_coding	HAVANA|ENSEMBL	8113926	8235926	ENSP00000385570.3|ENSP00000385651.2|ENSP00000265577.7|ENSP00000379908.3|ENSP00000410341.1|ENSP00000341603.6|ENSP00000385305.1|ENSP00000403982.2|ENSP00000386021.1|ENSP00000316074.5|ENSP00000398435.1|ENSP00000397496.1|ENSP00000393314.1|ENSP00000406722.1
ENSG00000127415.12	ENSG00000127415	IDUA	234.866	-0.534065	0.119204	-4.48025	7.46e-06	0.000387564	chr4	986997	1004506	+	protein_coding	HAVANA	987085	1004390	ENSP00000247933.4|ENSP00000422952.1|ENSP00000424847.1|ENSP00000423685.1|ENSP00000424227.1|ENSP00000425081.1
ENSG00000255733.5	ENSG00000255733	IFNG-AS1	43.1983	-1.3648	0.284296	-4.80064	1.58e-06	0.000129001	chr12	67989445	68234686	+	antisense	HAVANA	NA	NA
ENSG00000122970.15	ENSG00000122970	IFT81	301.49	0.317565	0.076481	4.1522	3.29e-05	0.00108592	chr12	110124335	110218797	+	protein_coding	HAVANA	110127381	110218223	ENSP00000355372.4|ENSP00000449718.1|ENSP00000242591.5|ENSP00000446950.1|ENSP00000446895.1|ENSP00000449964.1
ENSG00000147255.18	ENSG00000147255	IGSF1	45.304	0.790246	0.227907	3.4674	0.000525512	0.00749319	chrX	131273506	131578899	-	protein_coding	HAVANA|ENSEMBL	131273799	131286674	ENSP00000359947.1|ENSP00000355010.3|ENSP00000359940.3|ENSP00000359941.1|ENSP00000359937.1|ENSP00000359938.4
ENSG00000162729.13	ENSG00000162729	IGSF8	228.261	-0.290803	0.0949221	-3.06359	0.00218696	0.0203655	chr1	160091340	160098943	-	protein_coding	HAVANA|ENSEMBL	160091826	160098472	ENSP00000316664.7|ENSP00000357065.1|ENSP00000477565.1|ENSP00000397464.1
ENSG00000168918.13	ENSG00000168918	INPP5D	577.614	-0.951562	0.199495	-4.76985	1.84e-06	0.00014345	chr2	233059967	233207903	+	protein_coding	HAVANA	233060479	233206754	ENSP00000352575.7|ENSP00000405338.2|ENSP00000397421.1|ENSP00000414835.1|ENSP00000473280.1
ENSG00000161896.11	ENSG00000161896	IP6K3	49.2785	0.935031	0.197862	4.72567	2.29e-06	0.000169017	chr6	33721670	33746905	-	protein_coding	HAVANA	33722723	33735476	ENSP00000293756.4|ENSP00000398861.1|ENSP00000489479.1
ENSG00000241211.1	ENSG00000241211	IQCJ-SCHIP1-AS1	28.3052	0.67676	0.192643	3.51302	0.000443037	0.00669682	chr3	159765387	159768612	-	antisense	HAVANA	NA	NA
ENSG00000120645.11	ENSG00000120645	IQSEC3	67.5764	0.610813	0.168334	3.62857	0.000285001	0.00493062	chr12	66765	178460	+	protein_coding	HAVANA	66883	175030	ENSP00000437554.1|ENSP00000372292.2
ENSG00000184216.11	ENSG00000184216	IRAK1	743.228	-0.225092	0.076444	-2.94454	0.00323439	0.0265858	chrX	154010500	154019980	-	protein_coding	HAVANA	154010943	154019812	ENSP00000358997.3|ENSP00000358991.2|ENSP00000399974.1|ENSP00000411809.1|ENSP00000358990.3|ENSP00000410953.1|ENSP00000406249.1|ENSP00000377291.2|ENSP00000392662.2|ENSP00000403730.1
ENSG00000164171.10	ENSG00000164171	ITGA2	314.219	0.383941	0.137867	2.78485	0.00535518	0.0372903	chr5	52989326	53094779	+	protein_coding	HAVANA	52989469	53090596	ENSP00000296585.5|ENSP00000426489.1|ENSP00000422095.1|ENSP00000424397.1|ENSP00000424642.1|ENSP00000422145.1
ENSG00000259207.7	ENSG00000259207	ITGB3	64.7205	0.498643	0.161468	3.08819	0.00201383	0.0192511	chr17	47253846	47311816	+	protein_coding	HAVANA	47253862	47310201	ENSP00000452786.1|ENSP00000461626.1|ENSP00000465586.1
ENSG00000115221.10	ENSG00000115221	ITGB6	97.2857	0.681311	0.169516	4.01916	5.84e-05	0.00163923	chr2	160099666	160271888	-	protein_coding	HAVANA|ENSEMBL	160101739	160200063	ENSP00000283249.2|ENSP00000481183.1|ENSP00000386477.1|ENSP00000408024.2|ENSP00000386828.2|ENSP00000386367.1
ENSG00000105855.9	ENSG00000105855	ITGB8	644.913	0.451874	0.161447	2.79889	0.0051278	0.036244	chr7	20330702	20415754	+	protein_coding	HAVANA	20331807	20409994	ENSP00000441561.1|ENSP00000222573.3
ENSG00000143543.14	ENSG00000143543	JTB	466.035	-0.354008	0.0860244	-4.1152	3.87e-05	0.00122203	chr1	153974269	153977688	-	protein_coding	HAVANA	153974682	153977252	ENSP00000271843.4|ENSP00000349069.1|ENSP00000357578.1|ENSP00000395250.1
ENSG00000107104.18	ENSG00000107104	KANK1	1045.11	0.277395	0.104162	2.66313	0.00774185	0.047431	chr9	470291	746106	+	protein_coding	HAVANA|ENSEMBL	676973	745232	ENSP00000371740.1|ENSP00000477725.1|ENSP00000371734.2|ENSP00000371730.3|ENSP00000371726.2|ENSP00000371723.3
ENSG00000253991.1	ENSG00000253991	KB-1562D12.2	38.6238	0.423973	0.154329	2.74721	0.00601055	0.0401995	chr8	101528723	101529569	-	processed_pseudogene	HAVANA	NA	NA
ENSG00000121361.3	ENSG00000121361	KCNJ8	78.6807	0.409074	0.116159	3.52166	0.000428851	0.00655247	chr12	21764955	21775581	-	protein_coding	HAVANA	21765726	21773616	ENSP00000240662.2|ENSP00000440012.1
ENSG00000080709.14	ENSG00000080709	KCNN2	351.114	-1.30913	0.279515	-4.68359	2.82e-06	0.000195642	chr5	114360945	114496500	+	protein_coding	HAVANA|ENSEMBL	114362776	114496179	ENSP00000427120.3|ENSP00000483124.1|ENSP00000264773.2|ENSP00000487849.1|ENSP00000421439.1|ENSP00000421095.1
ENSG00000162687.16	ENSG00000162687	KCNT2	107.701	0.431707	0.144118	2.9955	0.00273992	0.0237143	chr1	196225779	196609225	-	protein_coding	HAVANA|ENSEMBL	196228227	196608309	ENSP00000356403.5|ENSP00000476657.1|ENSP00000405474.2|ENSP00000294725.8|ENSP00000477456.1
ENSG00000168301.12	ENSG00000168301	KCTD6	81.6901	0.214932	0.0675521	3.18172	0.00146405	0.0154384	chr3	58492114	58502360	+	protein_coding	HAVANA	58498756	58501629	ENSP00000384948.3|ENSP00000417490.1|ENSP00000442507.1|ENSP00000418999.1|ENSP00000347188.6
ENSG00000214264.4	ENSG00000214264	KCTD9P4	23.9112	0.427873	0.12783	3.34721	0.000816296	0.0102766	chr11	112180773	112183191	+	processed_pseudogene	HAVANA	NA	NA
ENSG00000136240.9	ENSG00000136240	KDELR2	1221.09	-0.366663	0.117373	-3.12392	0.00178461	0.017682	chr7	6445953	6484242	-	protein_coding	HAVANA	6462969	6484057	ENSP00000258739.4|ENSP00000420501.1|ENSP00000371702.3
ENSG00000135835.10	ENSG00000135835	KIAA1614	138.325	0.504636	0.107433	4.6972	2.64e-06	0.000187505	chr1	180913154	180951614	+	protein_coding	HAVANA	180913244	180945585	ENSP00000356560.4|ENSP00000356559.1
ENSG00000140859.15	ENSG00000140859	KIFC3	210.001	0.392128	0.107423	3.65033	0.000261908	0.0046473	chr16	57758217	57863053	-	protein_coding	HAVANA	57758544	57862836	ENSP00000454659.1|ENSP00000368976.4|ENSP00000401696.2|ENSP00000457568.1|ENSP00000396399.2|ENSP00000442008.1|ENSP00000438805.2|ENSP00000444012.1|ENSP00000456239.1|ENSP00000458009.1|ENSP00000457232.1|ENSP00000457326.1|ENSP00000454493.1|ENSP00000457948.1|ENSP00000454501.1|ENSP00000457247.1|ENSP00000454403.1|ENSP00000456780.1|ENSP00000454615.1|ENSP00000454632.1|ENSP00000456402.1|ENSP00000455276.1|ENS…
ENSG00000226520.1	ENSG00000226520	KIRREL-IT1	33.6919	0.449644	0.152018	2.95782	0.00309818	0.0257999	chr1	158025550	158031166	+	sense_intronic	HAVANA	NA	NA
ENSG00000102349.15	ENSG00000102349	KLF8	175.348	0.241114	0.0903022	2.67007	0.00758344	0.0468402	chrX	56232421	56287889	+	protein_coding	HAVANA|ENSEMBL	56233276	56284491	ENSP00000364063.3|ENSP00000417303.1|ENSP00000431911.1|ENSP00000489260.1
ENSG00000003096.13	ENSG00000003096	KLHL13	88.7424	0.516858	0.151519	3.41117	0.000646851	0.0086945	chrX	117897813	118117340	-	protein_coding	HAVANA|ENSEMBL	117898911	118028473	ENSP00000360949.1|ENSP00000360943.1|ENSP00000360945.1|ENSP00000412640.2|ENSP00000262820.3|ENSP00000443191.1|ENSP00000440707.1|ENSP00000441029.1|ENSP00000444450.1|ENSP00000419803.1|ENSP00000393807.1
ENSG00000239474.6	ENSG00000239474	KLHL41	34.0955	0.795308	0.245183	3.24373	0.00117975	0.0133256	chr2	169509702	169526262	+	protein_coding	HAVANA	169509779	169525693	ENSP00000284669.1
ENSG00000184445.11	ENSG00000184445	KNTC1	302.334	-0.332596	0.0927935	-3.58427	0.000338028	0.0055592	chr12	122527246	122626396	+	protein_coding	HAVANA	122530064	122626225	ENSP00000397992.2|ENSP00000328236.6|ENSP00000397140.2|ENSP00000408760.2|ENSP00000439119.1|ENSP00000437344.1
ENSG00000186847.5	ENSG00000186847	KRT14	90.7555	1.84657	0.240924	7.66452	1.79e-14	1.14e-10	chr17	41582279	41586921	-	protein_coding	HAVANA	41582438	41586834	ENSP00000167586.6
ENSG00000128422.15	ENSG00000128422	KRT17	370.781	0.943638	0.306303	3.08073	0.0020649	0.0195872	chr17	41619437	41624842	-	protein_coding	HAVANA|ENSEMBL	41619597	41624509	ENSP00000308452.8|ENSP00000441751.2|ENSP00000468672.1|ENSP00000467418.1|ENSP00000466166.1
ENSG00000108244.16	ENSG00000108244	KRT23	50.1475	1.05108	0.215755	4.87165	1.11e-06	0.000100235	chr17	40922696	40937634	-	protein_coding	HAVANA	40922992	40936603	ENSP00000209718.3|ENSP00000414056.3|ENSP00000462335.1|ENSP00000464548.1|ENSP00000464051.1|ENSP00000467393.1
ENSG00000196878.12	ENSG00000196878	LAMB3	187.749	0.899342	0.21601	4.16342	3.14e-05	0.0010519	chr1	209614870	209652466	-	protein_coding	HAVANA|ENSEMBL	209615274	209650944	ENSP00000348384.3|ENSP00000375778.1|ENSP00000355997.3|ENSP00000398683.1|ENSP00000388960.1
ENSG00000116586.11	ENSG00000116586	LAMTOR2	113.074	-0.31071	0.0735854	-4.22244	2.42e-05	0.000868775	chr1	156054752	156058510	+	protein_coding	HAVANA	156054890	156058406	ENSP00000357288.4|ENSP00000357287.5|ENSP00000357285.3
ENSG00000188186.10	ENSG00000188186	LAMTOR4	219.041	-0.425991	0.0720588	-5.91171	3.39e-09	1.68e-06	chr7	100148907	100155944	+	protein_coding	HAVANA	100148973	100155598	ENSP00000343118.5|ENSP00000477680.1|ENSP00000479176.1|ENSP00000387926.1|ENSP00000478095.1|ENSP00000479500.1|ENSP00000479685.1|ENSP00000480432.1|ENSP00000481202.1
ENSG00000133424.20	ENSG00000133424	LARGE	425.979	0.343341	0.100538	3.41504	0.000637736	0.0086274	chr22	33162226	33922841	-	protein_coding	HAVANA|ENSEMBL	33166766	33761476	ENSP00000476866.1|ENSP00000476364.1|ENSP00000476415.1|ENSP00000347088.2|ENSP00000380549.2|ENSP00000385223.1|ENSP00000403841.1|ENSP00000396277.2|ENSP00000415546.1|ENSP00000389605.1|ENSP00000411065.1|ENSP00000406000.1
ENSG00000135338.13	ENSG00000135338	LCA5	167.238	0.253322	0.0863769	2.93275	0.00335979	0.0273227	chr6	79484991	79537458	-	protein_coding	HAVANA	79487007	79518894	ENSP00000358861.4|ENSP00000376686.1|ENSP00000474463.1
ENSG00000136167.13	ENSG00000136167	LCP1	2751.46	-0.638737	0.163346	-3.91034	9.22e-05	0.00224055	chr13	46125920	46211871	-	protein_coding	HAVANA|ENSEMBL	46127594	46159662	ENSP00000381581.1|ENSP00000315757.2|ENSP00000408052.1|ENSP00000402157.1
ENSG00000122367.19	ENSG00000122367	LDB3	371.813	0.61858	0.211653	2.92262	0.00347101	0.0279454	chr10	86668449	86736068	+	protein_coding	HAVANA|ENSEMBL	86668692	86732973	ENSP00000401437.2|ENSP00000485500.1|ENSP00000361136.3|ENSP00000355296.3|ENSP00000438866.1|ENSP00000485389.1|ENSP00000361126.4|ENSP00000263066.6|ENSP00000485538.1
ENSG00000179241.12	ENSG00000179241	LDLRAD3	411.952	0.433382	0.124357	3.48499	0.000492159	0.00719618	chr11	35943981	36232136	+	protein_coding	HAVANA	35944099	36229394	ENSP00000433954.1|ENSP00000434313.1|ENSP00000318607.5
ENSG00000168924.14	ENSG00000168924	LETM1	635.603	-0.20172	0.070416	-2.86469	0.00417421	0.0315648	chr4	1811479	1856247	-	protein_coding	HAVANA	1814427	1855950	ENSP00000305653.2
ENSG00000165046.12	ENSG00000165046	LETM2	62.4207	0.444568	0.150098	2.96185	0.003058	0.0255925	chr8	38386207	38409527	+	protein_coding	HAVANA	38387984	38408271	ENSP00000432080.1|ENSP00000429269.2|ENSP00000297720.5|ENSP00000431211.1|ENSP00000369291.4|ENSP00000429019.2|ENSP00000428765.2|ENSP00000428944.2|ENSP00000432955.1|ENSP00000434867.1|ENSP00000432607.1
ENSG00000128342.4	ENSG00000128342	LIF	95.308	0.690731	0.192694	3.58459	0.000337602	0.00555426	chr22	30240447	30246851	-	protein_coding	HAVANA	30243654	30246695	ENSP00000249075.3|ENSP00000384450.3
ENSG00000005156.11	ENSG00000005156	LIG3	906.805	-0.320969	0.0987794	-3.24935	0.00115668	0.0131119	chr17	34980494	35009743	+	protein_coding	HAVANA	34980575	35004503	ENSP00000367787.3|ENSP00000468479.1|ENSP00000262327.4|ENSP00000467063.1|ENSP00000467757.1|ENSP00000466278.1|ENSP00000465288.1
ENSG00000203896.9	ENSG00000203896	LIME1	24.4272	-0.367675	0.104712	-3.51129	0.000445939	0.00672691	chr20	63736283	63739103	+	protein_coding	HAVANA	63737550	63738897	ENSP00000414506.1|ENSP00000309521.3|ENSP00000482812.1|ENSP00000477561.1|ENSP00000476772.1|ENSP00000478705.1
ENSG00000229240.8	ENSG00000229240	LINC00710	61.0729	0.74937	0.160279	4.6754	2.93e-06	0.000201186	chr10	10917880	10952234	-	processed_transcript	HAVANA	NA	NA
ENSG00000242759.6	ENSG00000242759	LINC00882	72.6724	0.512978	0.141769	3.6184	0.000296424	0.00507183	chr3	106836811	107240641	-	lincRNA	HAVANA	NA	NA
ENSG00000263812.5	ENSG00000263812	LINC00908	31.573	0.728056	0.202765	3.59064	0.000329873	0.00546567	chr18	76528655	76610968	+	lincRNA	HAVANA	NA	NA
ENSG00000212694.8	ENSG00000212694	LINC01089	235.805	-0.303979	0.0890708	-3.41278	0.000643031	0.00866464	chr12	121795267	121803906	-	lincRNA	HAVANA	NA	NA
ENSG00000169223.14	ENSG00000169223	LMAN2	751.982	-0.31234	0.0870575	-3.58774	0.00033356	0.00550892	chr5	177331562	177351852	-	protein_coding	HAVANA	177332089	177351647	ENSP00000303366.7|ENSP00000423998.1|ENSP00000424132.1|ENSP00000425229.1|ENSP00000427377.1
ENSG00000175556.16	ENSG00000175556	LONRF3	81.0581	0.679684	0.136529	4.9783	6.41e-07	6.68e-05	chrX	118974614	119018355	+	protein_coding	HAVANA|ENSEMBL	118974781	119017687	ENSP00000307732.7|ENSP00000435426.1|ENSP00000360690.3|ENSP00000414519.1|ENSP00000408894.2
ENSG00000077454.15	ENSG00000077454	LRCH4	243.622	-0.417005	0.0867989	-4.80426	1.55e-06	0.000126919	chr7	100574011	100586153	-	protein_coding	HAVANA|ENSEMBL	100574255	100586100	ENSP00000419674.1|ENSP00000483999.1|ENSP00000309689.6|ENSP00000419870.1
ENSG00000165379.13	ENSG00000165379	LRFN5	156.572	0.745071	0.199349	3.73753	0.000185839	0.00363222	chr14	41607570	41904549	+	protein_coding	HAVANA	41886626	41904172	ENSP00000298119.4|ENSP00000451897.1|ENSP00000451067.1
ENSG00000118308.14	ENSG00000118308	LRMP	145.831	-1.08713	0.23818	-4.56433	5.01e-06	0.000294335	chr12	25021002	25108334	+	protein_coding	HAVANA	25069408	25108057	ENSP00000448534.1|ENSP00000354805.2|ENSP00000452116.1|ENSP00000346442.3|ENSP00000444056.1|ENSP00000446496.1|ENSP00000451048.1|ENSP00000450634.1|ENSP00000450246.1|ENSP00000451159.1|ENSP00000450767.1|ENSP00000451196.1
ENSG00000168702.16	ENSG00000168702	LRP1B	196.628	0.595346	0.184035	3.23497	0.00121656	0.0135993	chr2	140231423	142131701	-	protein_coding	HAVANA|ENSEMBL	140233189	142130729	ENSP00000374135.3|ENSP00000415052.1|ENSP00000478868.1|ENSP00000393859.1|ENSP00000413239.1
ENSG00000134569.9	ENSG00000134569	LRP4	202.608	0.633074	0.128922	4.91052	9.08e-07	8.61e-05	chr11	46856868	46918642	-	protein_coding	HAVANA	46858986	46918379	ENSP00000367888.1|ENSP00000434763.1
ENSG00000171757.15	ENSG00000171757	LRRC34	31.8695	0.269726	0.102034	2.64349	0.00820557	0.0492301	chr3	169793428	169812986	-	protein_coding	HAVANA	169793638	169812548	ENSP00000414635.1|ENSP00000429593.1|ENSP00000429278.2|ENSP00000436883.1
ENSG00000137821.11	ENSG00000137821	LRRC49	182.864	0.286276	0.0846022	3.38379	0.000714923	0.00933225	chr15	70853239	71053657	+	protein_coding	HAVANA|ENSEMBL	70873206	71049609	ENSP00000439600.2|ENSP00000452925.1|ENSP00000453728.1|ENSP00000414065.2|ENSP00000454196.1|ENSP00000453807.1|ENSP00000453273.1|ENSP00000260382.4|ENSP00000453731.1|ENSP00000453456.1|ENSP00000452894.1|ENSP00000453038.1|ENSP00000454760.1|ENSP00000454170.1|ENSP00000454026.1|ENSP00000452775.1|ENSP00000452821.1|ENSP00000453300.1|ENSP00000453402.1
ENSG00000130332.14	ENSG00000130332	LSM7	162.333	-0.325408	0.080882	-4.02324	5.74e-05	0.00162551	chr19	2321517	2328620	-	protein_coding	HAVANA	2321683	2328566	ENSP00000252622.8|ENSP00000485007.1|ENSP00000466556.2|ENSP00000467145.1
ENSG00000171357.5	ENSG00000171357	LURAP1	35.6584	0.604891	0.120321	5.02731	4.97e-07	5.63e-05	chr1	46203334	46221261	+	protein_coding	HAVANA	46203427	46220217	ENSP00000361048.3
ENSG00000179222.17	ENSG00000179222	MAGED1	1196.66	-0.347898	0.115954	-3.0003	0.00269711	0.0234629	chrX	51803007	51902357	+	protein_coding	HAVANA	51894305	51901927	ENSP00000364927.3|ENSP00000364874.1|ENSP00000325333.7|ENSP00000364847.2
ENSG00000234456.7	ENSG00000234456	MAGI2-AS3	531.013	0.504847	0.144125	3.50285	0.000460314	0.0068712	chr7	79452877	79471208	+	processed_transcript	HAVANA	NA	NA
ENSG00000235751.3	ENSG00000235751	MAGI2-IT1	7.75276	0.689743	0.195971	3.51962	0.000432169	0.00658423	chr7	78901275	79000298	-	sense_intronic	HAVANA	NA	NA
ENSG00000172175.12	ENSG00000172175	MALT1	2290.29	-0.709811	0.217163	-3.26857	0.00108093	0.0125126	chr18	58671386	58754477	+	protein_coding	HAVANA	58671644	58747839	ENSP00000319279.4|ENSP00000304161.3|ENSP00000467222.1
ENSG00000165072.9	ENSG00000165072	MAMDC2	148.408	0.417285	0.148098	2.81763	0.00483795	0.0347951	chr9	70043581	70226970	+	protein_coding	HAVANA	70044198	70226029	ENSP00000366387.4
ENSG00000177239.14	ENSG00000177239	MAN1B1	830.133	-0.239647	0.0598175	-4.00631	6.17e-05	0.00170722	chr9	137086927	137109187	+	protein_coding	HAVANA	137087000	137109022	ENSP00000360645.4|ENSP00000444966.2|ENSP00000441398.2|ENSP00000440314.1|ENSP00000483132.1|ENSP00000444189.1|ENSP00000448658.1|ENSP00000450147.1
ENSG00000145050.15	ENSG00000145050	MANF	310.989	-0.562881	0.110228	-5.10651	3.28e-07	4.27e-05	chr3	51385047	51389397	+	protein_coding	HAVANA	51385334	51389086	ENSP00000432799.2|ENSP00000405280.1
ENSG00000189221.9	ENSG00000189221	MAOA	2037.28	-0.497683	0.182577	-2.72588	0.0064131	0.0420162	chrX	43654907	43746824	+	protein_coding	HAVANA|ENSEMBL	43656342	43744510	ENSP00000440846.1|ENSP00000340684.3
ENSG00000072518.20	ENSG00000072518	MARK2	897.599	-0.153468	0.0567634	-2.70364	0.00685849	0.043794	chr11	63838928	63911019	+	protein_coding	HAVANA|ENSEMBL	63839507	63909234	ENSP00000385751.2|ENSP00000367041.4|ENSP00000425765.1|ENSP00000355091.5|ENSP00000294247.9|ENSP00000423452.3|ENSP00000444956.1|ENSP00000444859.1|ENSP00000437509.1|ENSP00000423974.2|ENSP00000423844.1|ENSP00000421075.2|ENSP00000386128.3|ENSP00000415494.2
ENSG00000249057.1	ENSG00000249057	MAST4-IT1	10.8644	0.596671	0.212418	2.80895	0.00497041	0.0354028	chr5	66662331	66662988	+	sense_intronic	HAVANA	NA	NA
ENSG00000143797.11	ENSG00000143797	MBOAT2	1566.24	-0.633229	0.169212	-3.74223	0.000182391	0.00357777	chr2	8852690	9003813	-	protein_coding	HAVANA	8858682	9003614	ENSP00000302177.3|ENSP00000419573.1|ENSP00000420114.1|ENSP00000417409.1
ENSG00000171444.17	ENSG00000171444	MCC	684.428	0.36538	0.105872	3.45114	0.000558231	0.00784126	chr5	113022099	113488830	-	protein_coding	HAVANA	113027305	113488414	ENSP00000305617.4|ENSP00000421615.2|ENSP00000386227.3|ENSP00000485492.1|ENSP00000485220.1
ENSG00000160294.10	ENSG00000160294	MCM3AP	1171.84	-0.141387	0.0529016	-2.67264	0.00752573	0.0466302	chr21	46235126	46286297	-	protein_coding	HAVANA|ENSEMBL	46235271	46285286	ENSP00000291688.1|ENSP00000380820.1|ENSP00000408934.1
ENSG00000146701.11	ENSG00000146701	MDH2	638.077	-0.430742	0.100127	-4.30195	1.69e-05	0.000676133	chr7	76048051	76067508	+	protein_coding	HAVANA	76048161	76066407	ENSP00000475583.1|ENSP00000327070.5|ENSP00000416929.1|ENSP00000408649.2
ENSG00000163875.15	ENSG00000163875	MEAF6	948.77	-0.376872	0.129866	-2.90202	0.00370765	0.0291822	chr1	37492575	37514774	-	protein_coding	HAVANA|ENSEMBL	37493772	37514746	ENSP00000362166.2|ENSP00000296214.5|ENSP00000362165.1|ENSP00000362164.4|ENSP00000394966.2
ENSG00000227692.1	ENSG00000227692	MED28P3	18.9474	-0.30196	0.0989134	-3.05277	0.00226742	0.0208293	chr2	186364598	186365128	+	processed_pseudogene	HAVANA	NA	NA
ENSG00000258399.6	ENSG00000258399	MEG8	82.786	0.709271	0.212115	3.3438	0.000826386	0.0103682	chr14	100894770	100935999	+	lincRNA	HAVANA|ENSEMBL	NA	NA
ENSG00000230749.4	ENSG00000230749	MEIS1-AS2	23.6294	0.793893	0.168781	4.7037	2.55e-06	0.000183083	chr2	66439088	66441836	-	antisense	HAVANA	NA	NA
ENSG00000134138.19	ENSG00000134138	MEIS2	700.951	0.891867	0.164528	5.42077	5.93e-08	1.31e-05	chr15	36889204	37101299	-	protein_coding	HAVANA|ENSEMBL	36892176	37099466	ENSP00000453793.1|ENSP00000341400.4|ENSP00000380749.3|ENSP00000339549.5|ENSP00000326296.8|ENSP00000453390.1|ENSP00000453481.1|ENSP00000452693.2|ENSP00000380745.2|ENSP00000404185.2|ENSP00000453497.1|ENSP00000475899.1|ENSP00000475660.1|ENSP00000452874.1|ENSP00000453782.2|ENSP00000452770.1
ENSG00000133895.14	ENSG00000133895	MEN1	274.453	-0.259117	0.0575233	-4.50455	6.65e-06	0.000356634	chr11	64803510	64811294	-	protein_coding	HAVANA|ENSEMBL	64804337	64810109	ENSP00000366533.1|ENSP00000366538.1|ENSP00000366543.3|ENSP00000308975.6|ENSP00000323747.4|ENSP00000377899.2|ENSP00000377901.1|ENSP00000337088.1|ENSP00000366530.1|ENSP00000413944.1|ENSP00000394933.1|ENSP00000411218.1|ENSP00000402752.1|ENSP00000388016.1
ENSG00000103260.8	ENSG00000103260	METRN	145.177	-0.224879	0.0782503	-2.87384	0.00405511	0.0309703	chr16	715115	719655	+	protein_coding	HAVANA	715290	717477	ENSP00000455068.1|ENSP00000456647.1|ENSP00000219542.3|ENSP00000459900.1|ENSP00000457702.1
ENSG00000053328.8	ENSG00000053328	METTL24	42.6586	0.489561	0.148815	3.28972	0.00100285	0.0118978	chr6	110245928	110358272	-	protein_coding	HAVANA	110245949	110358272	ENSP00000344071.4
ENSG00000161091.12	ENSG00000161091	MFSD12	316.322	-0.164053	0.0580945	-2.8239	0.00474425	0.0343386	chr19	3538261	3574290	-	protein_coding	HAVANA|ENSEMBL	3539361	3573584	ENSP00000478456.1|ENSP00000381566.4|ENSP00000481557.1|ENSP00000467207.1|ENSP00000347583.1|ENSP00000374046.3|ENSP00000467635.1|ENSP00000465302.1|ENSP00000465782.1|ENSP00000466906.1|ENSP00000468287.1
ENSG00000167700.8	ENSG00000167700	MFSD3	92.6184	-0.457711	0.103515	-4.42168	9.79e-06	0.000465893	chr8	144509074	144511213	+	protein_coding	HAVANA	144509334	144511161	ENSP00000301327.3
ENSG00000154305.16	ENSG00000154305	MIA3	4161.83	-0.496387	0.132751	-3.73922	0.00018459	0.00361579	chr1	222618086	222668012	+	protein_coding	HAVANA	222618111	222665624	ENSP00000340900.5|ENSP00000341348.1|ENSP00000355062.3|ENSP00000345866.7|ENSP00000396598.1
ENSG00000155970.11	ENSG00000155970	MICU3	139.214	0.312453	0.0855921	3.65049	0.00026174	0.0046473	chr8	17027238	17122644	+	protein_coding	HAVANA	17027280	17118772	ENSP00000321455.5|ENSP00000427765.1|ENSP00000428890.1
ENSG00000100335.12	ENSG00000100335	MIEF1	385.507	-0.151899	0.0476912	-3.18505	0.00144729	0.0153144	chr22	39499432	39518132	+	protein_coding	HAVANA	39511295	39515370	ENSP00000385110.1|ENSP00000404096.2|ENSP00000327124.2|ENSP00000385191.1|ENSP00000390029.1|ENSP00000413730.1
ENSG00000174407.11	ENSG00000174407	MIR1-1HG	24.3508	0.650928	0.232351	2.80149	0.00508672	0.0360054	chr20	62550453	62570764	+	antisense	HAVANA	NA	NA
ENSG00000255090.5	ENSG00000255090	MIR100HG	52.2323	0.624179	0.159143	3.92214	8.78e-05	0.00216189	chr11	122155422	122422871	-	lincRNA	HAVANA	NA	NA
ENSG00000230937.9	ENSG00000230937	MIR205HG	399.472	1.29035	0.310159	4.16027	3.18e-05	0.00106329	chr1	209428820	209432838	+	processed_transcript	HAVANA	NA	NA
ENSG00000270069.1	ENSG00000270069	MIR222HG	124.777	0.664363	0.180776	3.67505	0.000237801	0.00433593	chrX	45745211	45770274	-	lincRNA	HAVANA	NA	NA
ENSG00000228526.4	ENSG00000228526	MIR34AHG	90.8534	0.375615	0.0927639	4.04915	5.14e-05	0.0015013	chr1	9148011	9196983	-	lincRNA	HAVANA	NA	NA
ENSG00000276765.1	ENSG00000276765	MIR8073	12.6852	0.798314	0.197502	4.04206	5.3e-05	0.00153471	chr13	110340958	110341029	+	miRNA	ENSEMBL	NA	NA
ENSG00000110917.7	ENSG00000110917	MLEC	2261.35	-0.292919	0.111014	-2.63859	0.00832521	0.0496921	chr12	120686869	120701864	+	protein_coding	HAVANA	120687297	120696552	ENSP00000228506.3|ENSP00000440746.1|ENSP00000438950.1|ENSP00000441247.1
ENSG00000238133.6	ENSG00000238133	MLK7-AS1	33.0015	0.423424	0.125244	3.38079	0.000722783	0.00940127	chr2	173166446	173282036	-	antisense	HAVANA	NA	NA
ENSG00000108788.11	ENSG00000108788	MLX	274.521	-0.300647	0.0630631	-4.7674	1.87e-06	0.000144246	chr17	42567068	42573239	+	protein_coding	HAVANA	42567125	42571600	ENSP00000416627.1|ENSP00000246912.3|ENSP00000320913.3|ENSP00000464697.1
ENSG00000142961.14	ENSG00000142961	MOB3C	272.792	0.226337	0.0779966	2.90188	0.00370933	0.0291902	chr1	46607715	46616891	-	protein_coding	HAVANA|ENSEMBL	46609658	46615076	ENSP00000315113.3|ENSP00000271139.8|ENSP00000361008.2
ENSG00000143158.10	ENSG00000143158	MPC2	456.103	-0.665141	0.16748	-3.97146	7.14e-05	0.00190408	chr1	167916729	167937040	-	protein_coding	HAVANA	167918326	167935841	ENSP00000356820.4|ENSP00000271373.4|ENSP00000392874.1
ENSG00000128309.16	ENSG00000128309	MPST	195.857	0.220837	0.083523	2.64402	0.00819276	0.0491811	chr22	37019635	37029822	+	protein_coding	HAVANA|ENSEMBL	37019837	37029511	ENSP00000384812.3|ENSP00000383950.3|ENSP00000342333.3|ENSP00000411719.3|ENSP00000385062.1|ENSP00000380402.2|ENSP00000486251.1
ENSG00000149573.8	ENSG00000149573	MPZL2	440.544	0.630511	0.158916	3.96758	7.26e-05	0.00192827	chr11	118253403	118264536	-	protein_coding	HAVANA	118257253	118264153	ENSP00000278937.2|ENSP00000408362.2
ENSG00000179832.17	ENSG00000179832	MROH1	762.63	-0.294753	0.0693593	-4.24966	2.14e-05	0.000798836	chr8	144148016	144261940	+	protein_coding	HAVANA|ENSEMBL	144163827	144261737	ENSP00000388174.2|ENSP00000436636.1|ENSP00000435565.1|ENSP00000321737.5|ENSP00000437866.1
ENSG00000137547.8	ENSG00000137547	MRPL15	147.55	-0.322909	0.0979511	-3.29664	0.000978494	0.0117094	chr8	54135210	54147901	+	protein_coding	HAVANA	54135284	54147716	ENSP00000260102.4|ENSP00000428581.1|ENSP00000429252.2
ENSG00000143314.12	ENSG00000143314	MRPL24	272.773	-0.225302	0.0729634	-3.08787	0.00201595	0.0192672	chr1	156737303	156741590	-	protein_coding	HAVANA	156737401	156738704	ENSP00000354525.2|ENSP00000357194.4|ENSP00000411369.1|ENSP00000406681.1|ENSP00000409803.1
ENSG00000116898.11	ENSG00000116898	MRPS15	254.193	-0.146518	0.0507725	-2.88578	0.00390447	0.0302264	chr1	36455718	36464437	-	protein_coding	HAVANA	36455791	36464275	ENSP00000362208.5
ENSG00000204568.11	ENSG00000204568	MRPS18B	260.154	-0.29108	0.0629426	-4.62453	3.75e-06	0.000238609	chr6	30617709	30626395	+	protein_coding	HAVANA	30617866	30625794	ENSP00000259873.4
ENSG00000125901.5	ENSG00000125901	MRPS26	270.12	-0.244747	0.0920085	-2.66005	0.00781285	0.047701	chr20	3045945	3048254	+	protein_coding	HAVANA	3046069	3047866	ENSP00000369682.3
ENSG00000074071.13	ENSG00000074071	MRPS34	250.25	-0.312774	0.0789624	-3.96105	7.46e-05	0.00196052	chr16	1771890	1773155	-	protein_coding	HAVANA|ENSEMBL	1772224	1773119	ENSP00000177742.3|ENSP00000380531.2|ENSP00000479049.1
ENSG00000149534.8	ENSG00000149534	MS4A2	123.067	0.480346	0.163628	2.93559	0.00332913	0.0271408	chr11	60088261	60098466	+	protein_coding	HAVANA|ENSEMBL	60088766	60095653	ENSP00000433311.1|ENSP00000278888.3|ENSP00000482594.1
ENSG00000210127.1	ENSG00000210127	MT-TA	12.7377	0.736045	0.264824	2.77938	0.00544635	0.0377013	chrM	5587	5655	-	Mt_tRNA	ENSEMBL	NA	NA
ENSG00000259045.1	ENSG00000259045	MTCO1P2	13.9608	0.651819	0.190783	3.41655	0.000634206	0.00859707	chr14	32484098	32484800	-	unprocessed_pseudogene	HAVANA	NA	NA
ENSG00000240796.1	ENSG00000240796	MTND2P14	8.16275	0.63353	0.239204	2.6485	0.0080851	0.0487782	chr3	106902173	106902523	+	unprocessed_pseudogene	HAVANA	NA	NA
ENSG00000243658.1	ENSG00000243658	MTND5P16	23.9912	0.648531	0.184543	3.51425	0.000441004	0.00667976	chr3	106898889	106900591	+	unprocessed_pseudogene	HAVANA	NA	NA
ENSG00000120662.15	ENSG00000120662	MTRF1	115.667	-0.185468	0.0689937	-2.68818	0.00718419	0.0452218	chr13	41216369	41263577	-	protein_coding	HAVANA|ENSEMBL	41217118	41260907	ENSP00000368793.3|ENSP00000368790.1|ENSP00000481161.1|ENSP00000482339.1|ENSP00000399279.1|ENSP00000484414.1|ENSP00000400031.3
ENSG00000123933.14	ENSG00000123933	MXD4	915.357	-0.279565	0.0737351	-3.79148	0.000149751	0.00312108	chr4	2247432	2262294	-	protein_coding	HAVANA	2250547	2261980	ENSP00000337889.2|ENSP00000422660.1|ENSP00000421209.1
ENSG00000074842.7	ENSG00000074842	MYDGF	311.091	-0.360145	0.108756	-3.31149	0.000928	0.011248	chr19	4641374	4670370	-	protein_coding	HAVANA	4641586	4670334	ENSP00000469136.1|ENSP00000262947.2|ENSP00000469945.1
ENSG00000109063.14	ENSG00000109063	MYH3	310.382	0.67086	0.199613	3.36079	0.000777189	0.00992815	chr17	10628526	10657309	-	protein_coding	HAVANA	10628656	10655064	ENSP00000464317.1
ENSG00000160808.9	ENSG00000160808	MYL3	19.2926	0.660472	0.246978	2.67421	0.00749044	0.0464953	chr3	46857872	46882169	-	protein_coding	HAVANA	46858247	46863390	ENSP00000379210.1|ENSP00000292327.4|ENSP00000393455.1
ENSG00000250174.5	ENSG00000250174	MYLK-AS2	23.1793	0.490978	0.157842	3.11056	0.00186735	0.0182528	chr3	123689644	123692407	+	antisense	HAVANA	NA	NA
ENSG00000263155.5	ENSG00000263155	MYZAP	21.2445	0.529644	0.157391	3.36515	0.000765034	0.00981186	chr15	57591941	57685364	+	protein_coding	HAVANA	57592035	57684495	ENSP00000267853.5|ENSP00000369939.4|ENSP00000457126.1|ENSP00000431396.1
ENSG00000170476.15	ENSG00000170476	MZB1	186.611	-0.515268	0.157359	-3.27448	0.00105856	0.0123335	chr5	139387480	139390081	-	protein_coding	HAVANA	139387768	139389856	ENSP00000423205.1|ENSP00000415420.2|ENSP00000425850.1|ENSP00000303920.8|ENSP00000424481.1
ENSG00000225552.1	ENSG00000225552	NAALADL2-AS1	37.1746	-1.09313	0.241671	-4.52323	6.09e-06	0.000337589	chr3	175773145	175776333	-	antisense	HAVANA	NA	NA
ENSG00000173559.12	ENSG00000173559	NABP1	590.84	-0.454798	0.161577	-2.81474	0.0048816	0.0350066	chr2	191678068	191696659	+	protein_coding	HAVANA	191678615	191685765	ENSP00000310819.5|ENSP00000307968.3|ENSP00000387243.1|ENSP00000390901.1|ENSP00000386605.1|ENSP00000403683.2|ENSP00000397041.1
ENSG00000008130.15	ENSG00000008130	NADK	518.227	-0.179322	0.0510442	-3.51307	0.000442964	0.00669682	chr1	1751232	1780457	-	protein_coding	HAVANA	1752907	1765406	ENSP00000341679.5|ENSP00000344340.3|ENSP00000367890.1|ENSP00000339727.5|ENSP00000464137.1|ENSP00000462589.1|ENSP00000462999.1|ENSP00000464096.1
ENSG00000254542.1	ENSG00000254542	NAV2-AS3	11.5767	0.549393	0.17049	3.22245	0.00127101	0.0140414	chr11	19978699	19981337	-	antisense	HAVANA	NA	NA
ENSG00000151503.12	ENSG00000151503	NCAPD3	3474.03	0.974349	0.25271	3.85559	0.000115449	0.00261406	chr11	134150119	134225454	-	protein_coding	HAVANA	134152947	134223926	ENSP00000434168.2|ENSP00000433681.2|ENSP00000431612.2|ENSP00000432532.1|ENSP00000435173.1|ENSP00000431413.1|ENSP00000436037.1|ENSP00000431436.1|ENSP00000435586.1|ENSP00000435655.1
ENSG00000125912.10	ENSG00000125912	NCLN	326.028	-0.241586	0.067034	-3.60394	0.000313428	0.00526209	chr19	3185563	3209575	+	protein_coding	HAVANA	3186031	3207685	ENSP00000466678.1|ENSP00000246117.3|ENSP00000467011.1|ENSP00000466300.1|ENSP00000466296.1|ENSP00000467693.1|ENSP00000466844.1
ENSG00000170906.15	ENSG00000170906	NDUFA3	141.817	-0.188185	0.0584503	-3.21958	0.0012838	0.0141263	chr19	54102728	54109257	+	protein_coding	HAVANA	54102879	54108519	ENSP00000412325.1|ENSP00000398290.1|ENSP00000418438.1|ENSP00000375642.1|ENSP00000474705.1|ENSP00000410453.1|ENSP00000375643.3|ENSP00000375644.3|ENSP00000474408.1|ENSP00000407335.1|ENSP00000394383.1
ENSG00000140990.14	ENSG00000140990	NDUFB10	400.622	-0.273054	0.0759808	-3.59373	0.000325982	0.00542759	chr16	1959508	1961975	+	protein_coding	HAVANA	1959625	1961903	ENSP00000268668.6|ENSP00000445086.2|ENSP00000455348.1|ENSP00000457908.1
ENSG00000099795.6	ENSG00000099795	NDUFB7	264.614	-0.259119	0.0812214	-3.19028	0.00142134	0.0151322	chr19	14566078	14572062	-	protein_coding	HAVANA	14566136	14572000	ENSP00000473120.1|ENSP00000215565.1
ENSG00000145494.11	ENSG00000145494	NDUFS6	273.186	-0.315598	0.0677672	-4.6571	3.21e-06	0.000213976	chr5	1801400	1816605	+	protein_coding	HAVANA	1801418	1815913	ENSP00000274137.5|ENSP00000422557.1
ENSG00000110717.10	ENSG00000110717	NDUFS8	262.188	-0.201454	0.0687879	-2.92863	0.00340462	0.0275914	chr11	68030617	68036644	+	protein_coding	HAVANA	68030907	68036590	ENSP00000315774.5|ENSP00000403972.2|ENSP00000433645.1|ENSP00000432848.1|ENSP00000433054.1|ENSP00000436287.1|ENSP00000433521.1|ENSP00000432968.1|ENSP00000431293.1|ENSP00000434283.1
ENSG00000123119.11	ENSG00000123119	NECAB1	90.5858	0.455196	0.168755	2.69738	0.00698873	0.0444335	chr8	90791550	90959408	+	protein_coding	HAVANA	90791887	90955509	ENSP00000387380.2|ENSP00000428953.1|ENSP00000428632.1
ENSG00000188986.5	ENSG00000188986	NELFB	312.314	-0.274105	0.0671069	-4.08461	4.42e-05	0.00134671	chr9	137255173	137273547	+	protein_coding	HAVANA|ENSEMBL	137255366	137272925	ENSP00000339495.5|ENSP00000489248.1
ENSG00000189362.11	ENSG00000189362	NEMP2	185.45	-0.303128	0.100751	-3.00869	0.00262376	0.0230152	chr2	190504342	190534722	-	protein_coding	HAVANA	190509192	190534655	ENSP00000386292.3|ENSP00000404283.1|ENSP00000403867.1|ENSP00000340087.5|ENSP00000410306.1
ENSG00000237853.6	ENSG00000237853	NFIA-AS1	54.2682	0.353715	0.0898767	3.93556	8.3e-05	0.00208677	chr1	61248945	61253510	-	processed_transcript	HAVANA	NA	NA
ENSG00000145912.8	ENSG00000145912	NHP2	163.951	-0.287351	0.0830442	-3.46022	0.000539733	0.00764936	chr5	178149460	178153967	-	protein_coding	HAVANA	178149716	178153817	ENSP00000274606.3|ENSP00000366276.2|ENSP00000431126.1|ENSP00000423803.1|ENSP00000423849.1
ENSG00000188158.14	ENSG00000188158	NHS	261.621	0.530163	0.134576	3.93951	8.16e-05	0.00206518	chrX	17375420	17735994	+	protein_coding	HAVANA|ENSEMBL	17375758	17732461	ENSP00000369400.3|ENSP00000381170.3|ENSP00000478433.1|ENSP00000480113.1
ENSG00000165028.11	ENSG00000165028	NIPSNAP3B	66.0754	-0.412769	0.0915543	-4.50846	6.53e-06	0.000352697	chr9	104764157	104777457	+	protein_coding	HAVANA	104764241	104773070	ENSP00000435209.1|ENSP00000363894.3
ENSG00000153406.13	ENSG00000153406	NMRAL1	373.563	-0.214454	0.0630501	-3.40132	0.000670614	0.00890389	chr16	4461680	4495763	-	protein_coding	HAVANA	4461783	4474132	ENSP00000283429.6|ENSP00000458762.1|ENSP00000461763.1|ENSP00000459221.1|ENSP00000383962.3|ENSP00000460263.1|ENSP00000460837.1|ENSP00000460476.1|ENSP00000459926.1|ENSP00000459022.1|ENSP00000458425.1
ENSG00000144061.12	ENSG00000144061	NPHP1	185.399	0.255389	0.0907495	2.81422	0.00488959	0.0350186	chr2	110122311	110205066	-	protein_coding	HAVANA	110123794	110204968	ENSP00000313169.4|ENSP00000389879.2|ENSP00000376953.3|ENSP00000347452.4|ENSP00000402176.1|ENSP00000392562.1|ENSP00000412351.1|ENSP00000406453.1
ENSG00000159899.14	ENSG00000159899	NPR2	177.616	0.264215	0.0849355	3.11077	0.001866	0.0182435	chr9	35792154	35809732	+	protein_coding	HAVANA	35792409	35809661	ENSP00000341083.2|ENSP00000399204.1|ENSP00000393029.1|ENSP00000402902.1
ENSG00000122585.7	ENSG00000122585	NPY	2812.46	-1.21308	0.405355	-2.99263	0.00276587	0.0238745	chr7	24284163	24291865	+	protein_coding	HAVANA	24285241	24291684	ENSP00000242152.2|ENSP00000384364.1|ENSP00000385282.1
ENSG00000237187.8	ENSG00000237187	NR2F1-AS1	235.057	0.45073	0.110983	4.06124	4.88e-05	0.0014442	chr5	93409359	93585648	-	antisense	HAVANA	NA	NA
ENSG00000197893.13	ENSG00000197893	NRAP	106.633	1.12286	0.402671	2.78853	0.00529478	0.0370008	chr10	113588716	113664127	-	protein_coding	HAVANA|ENSEMBL	113588978	113663882	ENSP00000358367.3|ENSP00000353666.3|ENSP00000358365.4|ENSP00000353078.2
ENSG00000123572.16	ENSG00000123572	NRK	177.855	0.912245	0.25188	3.62174	0.000292631	0.00503032	chrX	105822543	105958610	+	protein_coding	HAVANA	105822846	105955597	ENSP00000434830.1|ENSP00000438785.1|ENSP00000438378.2|ENSP00000438148.1
ENSG00000140538.16	ENSG00000140538	NTRK3	333.875	0.492457	0.163711	3.00809	0.00262897	0.0230563	chr15	87859751	88256768	-	protein_coding	HAVANA|ENSEMBL	87876938	88256153	ENSP00000377990.1|ENSP00000485864.1|ENSP00000347397.3|ENSP00000354207.2|ENSP00000350356.2|ENSP00000486784.1|ENSP00000453959.1|ENSP00000473315.1|ENSP00000437773.2|ENSP00000453511.1|ENSP00000318328.3|ENSP00000480693.1|ENSP00000444673.2|ENSP00000473475.1|ENSP00000473656.1
ENSG00000168101.14	ENSG00000168101	NUDT16L1	118.039	-0.278372	0.0778763	-3.57454	0.000350841	0.00572317	chr16	4693694	4695859	+	protein_coding	HAVANA	4693727	4695176	ENSP00000306670.5|ENSP00000466854.1|ENSP00000468346.1|ENSP00000458144.1|ENSP00000464821.1
ENSG00000144909.7	ENSG00000144909	OSBPL11	217.036	-0.168042	0.060254	-2.7889	0.00528881	0.0369866	chr3	125528858	125595090	-	protein_coding	HAVANA	125530518	125594800	ENSP00000296220.5
ENSG00000070882.12	ENSG00000070882	OSBPL3	210.1	-0.503769	0.145056	-3.47292	0.000514829	0.0073958	chr7	24796539	24981634	-	protein_coding	HAVANA	24800186	24892472	ENSP00000315410.2|ENSP00000386429.1|ENSP00000379708.1|ENSP00000386801.1|ENSP00000386325.1|ENSP00000386990.1|ENSP00000379706.1|ENSP00000386953.1|ENSP00000407829.1|ENSP00000403374.1|ENSP00000411249.1
ENSG00000204237.4	ENSG00000204237	OXLD1	91.2165	-0.312263	0.0814793	-3.83242	0.00012689	0.00279873	chr17	81665036	81666635	-	protein_coding	HAVANA	81665204	81666577	ENSP00000363873.3|ENSP00000466256.1|ENSP00000459191.1|ENSP00000459374.1|ENSP00000459281.1
ENSG00000135124.14	ENSG00000135124	P2RX4	341.326	-0.235456	0.0661777	-3.55793	0.000373782	0.00598498	chr12	121209857	121234106	+	protein_coding	HAVANA|ENSEMBL	121210165	121233654	ENSP00000336607.4|ENSP00000438131.2|ENSP00000353032.7|ENSP00000444274.1|ENSP00000439386.1|ENSP00000444033.1|ENSP00000438329.1|ENSP00000437396.1
ENSG00000124374.8	ENSG00000124374	PAIP2B	405.369	-0.395711	0.0941597	-4.20255	2.64e-05	0.000921119	chr2	71182739	71227083	-	protein_coding	HAVANA	71188482	71202589	ENSP00000244221.8
ENSG00000114054.13	ENSG00000114054	PCCB	337.016	-0.344199	0.125765	-2.73684	0.00620322	0.0411263	chr3	136250306	136337896	+	protein_coding	HAVANA	136250376	136334304	ENSP00000251654.4|ENSP00000418307.1|ENSP00000420639.1|ENSP00000419129.1|ENSP00000420391.1|ENSP00000420158.1|ENSP00000417937.1|ENSP00000417253.1|ENSP00000417549.1|ENSP00000419027.1|ENSP00000419263.1|ENSP00000420759.1|ENSP00000419563.1|ENSP00000418020.1|ENSP00000419293.1
ENSG00000240184.6	ENSG00000240184	PCDHGC3	302.558	0.37266	0.126084	2.95565	0.00312015	0.0259168	chr5	141475947	141512979	+	protein_coding	HAVANA	141476117	141511170	ENSP00000481219.1|ENSP00000483383.1|ENSP00000484352.1|ENSP00000481673.1|ENSP00000312070.3
ENSG00000248485.1	ENSG00000248485	PCP4L1	43.5234	0.53569	0.190513	2.81183	0.00492598	0.0351939	chr1	161258727	161285450	+	protein_coding	HAVANA	161258975	161284478	ENSP00000426296.1
ENSG00000105650.21	ENSG00000105650	PDE4C	64.2862	0.499092	0.181126	2.75549	0.00586044	0.0394817	chr19	18207961	18255419	-	protein_coding	HAVANA|ENSEMBL	18210932	18233191	ENSP00000347689.2|ENSP00000469696.1|ENSP00000402091.1|ENSP00000262805.10|ENSP00000470210.1|ENSP00000439470.1|ENSP00000473713.2|ENSP00000474591.3|ENSP00000476923.1|ENSP00000473937.3|ENSP00000474849.3|ENSP00000476961.1|ENSP00000472034.1
ENSG00000145431.10	ENSG00000145431	PDGFC	352.721	0.452812	0.14829	3.05356	0.00226146	0.0208088	chr4	156760454	156971394	-	protein_coding	HAVANA	156763093	156970903	ENSP00000422464.1|ENSP00000274071.2|ENSP00000424600.1|ENSP00000410048.2
ENSG00000167004.12	ENSG00000167004	PDIA3	2686.4	-0.406304	0.151108	-2.68883	0.00717021	0.045188	chr15	43746392	43773279	+	protein_coding	HAVANA	43746540	43771215	ENSP00000300289.5|ENSP00000391111.1|ENSP00000398005.1|ENSP00000389906.1
ENSG00000155660.10	ENSG00000155660	PDIA4	2123.31	-0.430862	0.121592	-3.5435	0.000394855	0.00620855	chr7	149003062	149028641	-	protein_coding	HAVANA	149003797	149028408	ENSP00000286091.4|ENSP00000408628.1
ENSG00000163110.14	ENSG00000163110	PDLIM5	10315.6	-0.934359	0.191751	-4.87276	1.1e-06	0.00010011	chr4	94451857	94668227	+	protein_coding	HAVANA|ENSEMBL	94455289	94664064	ENSP00000322021.5|ENSP00000369527.3|ENSP00000398469.2|ENSP00000480359.1|ENSP00000352210.4|ENSP00000321746.4|ENSP00000426379.1|ENSP00000424297.1|ENSP00000423009.1|ENSP00000486938.1|ENSP00000442187.2|ENSP00000426804.1|ENSP00000424360.1|ENSP00000486834.1|ENSP00000422833.1|ENSP00000429577.1|ENSP00000422528.1
ENSG00000157911.9	ENSG00000157911	PEX10	191.709	-0.502019	0.171395	-2.92902	0.00340038	0.0275621	chr1	2403964	2413797	-	protein_coding	HAVANA	2405769	2412502	ENSP00000288774.3|ENSP00000407922.2|ENSP00000424291.1|ENSP00000423051.1|ENSP00000464289.1|ENSP00000461951.1|ENSP00000425924.1
ENSG00000166821.8	ENSG00000166821	PEX11A	295.87	-0.399685	0.146538	-2.72753	0.0063811	0.041881	chr15	89677764	89690783	-	protein_coding	HAVANA	89681521	89690632	ENSP00000453552.1|ENSP00000300056.3|ENSP00000453492.1|ENSP00000453878.1
ENSG00000197121.14	ENSG00000197121	PGAP1	407.409	0.248448	0.0897202	2.76914	0.00562045	0.0384857	chr2	196833004	196927796	-	protein_coding	HAVANA	196841237	196927610	ENSP00000346809.3|ENSP00000415405.1|ENSP00000390555.1|ENSP00000387028.1|ENSP00000386802.1|ENSP00000363870.3
ENSG00000137338.5	ENSG00000137338	PGBD1	76.6833	0.196425	0.0616714	3.18502	0.00144745	0.0153144	chr6	28281572	28302549	+	protein_coding	HAVANA	28283814	28302281	ENSP00000259883.3
ENSG00000142657.20	ENSG00000142657	PGD	354.771	-0.217538	0.0689822	-3.15354	0.00161303	0.0164835	chr1	10398592	10420144	+	protein_coding	HAVANA	10399118	10419746	ENSP00000466358.1|ENSP00000465311.1|ENSP00000270776.8|ENSP00000466156.1|ENSP00000466574.1|ENSP00000467362.1
ENSG00000130313.6	ENSG00000130313	PGLS	148.736	-0.236035	0.0637115	-3.70475	0.0002116	0.00398789	chr19	17511629	17521288	+	protein_coding	HAVANA	17511673	17521078	ENSP00000252603.1|ENSP00000471446.1|ENSP00000472345.1|ENSP00000471951.1
ENSG00000082175.14	ENSG00000082175	PGR	460.015	0.725589	0.209036	3.47112	0.00051829	0.00742498	chr11	101029624	101130524	-	protein_coding	HAVANA|ENSEMBL	101039119	101129070	ENSP00000325120.5|ENSP00000436561.1|ENSP00000432914.1|ENSP00000432352.1|ENSP00000436803.1|ENSP00000263463.5|ENSP00000481227.1|ENSP00000482698.1|ENSP00000487607.1
ENSG00000040199.18	ENSG00000040199	PHLPP2	278.308	0.253476	0.0551688	4.59455	4.34e-06	0.000264121	chr16	71637835	71724701	-	protein_coding	HAVANA	71640903	71723867	ENSP00000458660.1|ENSP00000456572.1|ENSP00000457991.1|ENSP00000377159.2|ENSP00000454519.1
ENSG00000054148.17	ENSG00000054148	PHPT1	270.566	-0.246893	0.0890035	-2.77398	0.00553759	0.0380956	chr9	136848724	136851027	+	protein_coding	HAVANA	136849431	136850844	ENSP00000360724.1|ENSP00000247665.10
ENSG00000168490.13	ENSG00000168490	PHYHIP	75.7002	0.853631	0.165572	5.15566	2.53e-07	3.61e-05	chr8	22219704	22232341	-	protein_coding	HAVANA	22221356	22228357	ENSP00000320017.3|ENSP00000415491.2|ENSP00000430870.1
ENSG00000154864.11	ENSG00000154864	PIEZO2	445.305	0.582539	0.121906	4.77859	1.77e-06	0.00013887	chr18	10666483	11148762	-	protein_coding	HAVANA|ENSEMBL	10666596	11148588	ENSP00000462187.1|ENSP00000303316.6|ENSP00000372900.3|ENSP00000443129.1|ENSP00000463094.1|ENSP00000421377.3|ENSP00000462115.1|ENSP00000477311.1|ENSP00000462560.1|ENSP00000463589.1
ENSG00000166908.17	ENSG00000166908	PIP4K2C	321.134	-0.235603	0.0867032	-2.71735	0.00658063	0.0427224	chr12	57591174	57603418	+	protein_coding	HAVANA	57591290	57601603	ENSP00000412035.3|ENSP00000439878.2|ENSP00000450197.1|ENSP00000447390.1|ENSP00000449335.1|ENSP00000448042.1|ENSP00000347032.5|ENSP00000449538.1
ENSG00000123143.12	ENSG00000123143	PKN1	721.203	-0.270753	0.0647072	-4.18428	2.86e-05	0.000983682	chr19	14433053	14471867	+	protein_coding	HAVANA	14433522	14471862	ENSP00000467422.1|ENSP00000242783.6|ENSP00000465842.1|ENSP00000466367.1|ENSP00000343325.4|ENSP00000466819.1|ENSP00000465867.1|ENSP00000468497.1
ENSG00000118495.18	ENSG00000118495	PLAGL1	419.552	0.442584	0.104848	4.22119	2.43e-05	0.000872205	chr6	143940300	144064599	-	protein_coding	HAVANA|ENSEMBL	143941427	143948136	ENSP00000353734.2|ENSP00000376124.2|ENSP00000346810.2|ENSP00000400060.1|ENSP00000392418.1|ENSP00000400929.1|ENSP00000356544.1|ENSP00000486355.1|ENSP00000356543.1|ENSP00000395960.2|ENSP00000486632.1|ENSP00000487447.1|ENSP00000486752.1|ENSP00000485907.1|ENSP00000486763.1|ENSP00000486711.1
ENSG00000115896.15	ENSG00000115896	PLCL1	372.901	0.452429	0.150101	3.01416	0.00257688	0.0227617	chr2	197804702	198572581	+	protein_coding	HAVANA|ENSEMBL	197805100	198146959	ENSP00000402861.1|ENSP00000410488.1|ENSP00000457588.1|ENSP00000414138.3
ENSG00000021300.13	ENSG00000021300	PLEKHB1	199.926	-0.46777	0.15307	-3.05592	0.00224373	0.0207112	chr11	73646178	73662819	+	protein_coding	HAVANA	73646609	73661599	ENSP00000346127.5|ENSP00000381505.4|ENSP00000440122.1|ENSP00000227214.6|ENSP00000381507.4|ENSP00000441224.1|ENSP00000443899.1|ENSP00000445990.1|ENSP00000439714.1|ENSP00000438809.1|ENSP00000445807.1|ENSP00000444453.1|ENSP00000442136.1|ENSP00000442616.1|ENSP00000440102.1|ENSP00000441558.1
ENSG00000104886.9	ENSG00000104886	PLEKHJ1	138.121	-0.237892	0.0606644	-3.92145	8.8e-05	0.00216568	chr19	2230084	2237704	-	protein_coding	HAVANA|ENSEMBL	2230166	2236248	ENSP00000464955.1|ENSP00000468441.1|ENSP00000468257.1|ENSP00000465391.1|ENSP00000318075.2|ENSP00000464924.1
ENSG00000182013.17	ENSG00000182013	PNMAL1	85.2246	0.703148	0.156384	4.49627	6.92e-06	0.0003668	chr19	46466491	46471563	-	protein_coding	HAVANA	46468542	46471035	ENSP00000410273.1|ENSP00000318131.10|ENSP00000473064.1
ENSG00000114631.10	ENSG00000114631	PODXL2	440.961	-0.653565	0.192937	-3.38745	0.000705443	0.00922722	chr3	127629181	127672809	+	protein_coding	HAVANA	127629220	127672477	ENSP00000345359.6
ENSG00000099817.11	ENSG00000099817	POLR2E	404.201	-0.164887	0.0564633	-2.92025	0.00349752	0.0280873	chr19	1086579	1095380	-	protein_coding	HAVANA	1088717	1095315	ENSP00000464739.1|ENSP00000478303.1|ENSP00000479560.1|ENSP00000485021.1|ENSP00000465066.1|ENSP00000467905.1|ENSP00000215587.7|ENSP00000479813.1|ENSP00000480562.1
ENSG00000005075.15	ENSG00000005075	POLR2J	168.68	-0.548511	0.106937	-5.1293	2.91e-07	3.96e-05	chr7	102473118	102478907	-	protein_coding	HAVANA|ENSEMBL	102473652	102478860	ENSP00000292614.5|ENSP00000377383.4
ENSG00000196313.11	ENSG00000196313	POM121	617.865	-0.250201	0.0764242	-3.27385	0.00106092	0.0123423	chr7	72879365	72951440	+	protein_coding	HAVANA|ENSEMBL	72925122	72948467	ENSP00000378687.1|ENSP00000486504.1|ENSP00000393020.1|ENSP00000351124.3|ENSP00000405562.2
ENSG00000172336.4	ENSG00000172336	POP7	74.6304	-0.464785	0.0947316	-4.90634	9.28e-07	8.76e-05	chr7	100706053	100707495	+	protein_coding	HAVANA	100706831	100707250	ENSP00000304353.4|ENSP00000387814.1
ENSG00000109819.8	ENSG00000109819	PPARGC1A	170.017	0.657789	0.154942	4.24537	2.18e-05	0.000808798	chr4	23755041	23904089	-	protein_coding	HAVANA|ENSEMBL	23795825	23889957	ENSP00000264867.2|ENSP00000481498.1|ENSP00000423075.1|ENSP00000421632.1|ENSP00000477921.1|ENSP00000479729.1|ENSP00000424181.1
ENSG00000196262.13	ENSG00000196262	PPIA	1566.09	-0.34766	0.0749295	-4.63983	3.49e-06	0.000228114	chr7	44796680	44824564	+	protein_coding	HAVANA|ENSEMBL	44796725	44823179	ENSP00000405975.1|ENSP00000419425.1|ENSP00000427976.1|ENSP00000430817.1|ENSP00000479961.1|ENSP00000429251.1|ENSP00000394670.1
ENSG00000166794.4	ENSG00000166794	PPIB	669.74	-0.326043	0.103185	-3.15978	0.0015789	0.0162321	chr15	64155812	64163205	-	protein_coding	HAVANA	64156026	64162986	ENSP00000300026.3
ENSG00000172531.14	ENSG00000172531	PPP1CA	376.61	-0.24883	0.080107	-3.10622	0.00189493	0.0184564	chr11	67398183	67421183	-	protein_coding	HAVANA	67398538	67421134	ENSP00000326031.7|ENSP00000365936.4|ENSP00000350974.4|ENSP00000431146.1|ENSP00000439568.1|ENSP00000438409.1
ENSG00000173457.10	ENSG00000173457	PPP1R14B	170.952	-0.438506	0.0953902	-4.59697	4.29e-06	0.000261876	chr11	64244480	64246941	-	protein_coding	HAVANA	64244757	64246673	ENSP00000441067.1|ENSP00000310117.3|ENSP00000439333.1
ENSG00000160972.9	ENSG00000160972	PPP1R16A	169.999	-0.274372	0.0914656	-2.99972	0.00270224	0.0234885	chr8	144477969	144502121	+	protein_coding	HAVANA|ENSEMBL	144497195	144501900	ENSP00000292539.4|ENSP00000480604.1|ENSP00000391126.1
ENSG00000138814.16	ENSG00000138814	PPP3CA	4655.95	-0.556702	0.162577	-3.42425	0.000616503	0.00842798	chr4	101023409	101348278	-	protein_coding	HAVANA	101025868	101346796	ENSP00000422781.1|ENSP00000378323.3|ENSP00000320580.6|ENSP00000378322.4|ENSP00000422990.1|ENSP00000426565.1|ENSP00000431619.1|ENSP00000434599.1
ENSG00000149923.13	ENSG00000149923	PPP4C	316.817	-0.162094	0.0554092	-2.9254	0.00344015	0.0277828	chr16	30075978	30085377	+	protein_coding	HAVANA|ENSEMBL	30076378	30085059	ENSP00000455394.1|ENSP00000279387.7|ENSP00000458079.1|ENSP00000461609.1|ENSP00000457089.1|ENSP00000486140.1|ENSP00000457915.1|ENSP00000455995.1
ENSG00000138738.10	ENSG00000138738	PRDM5	213.823	0.502214	0.109103	4.6031	4.16e-06	0.000257472	chr4	120684919	120922870	-	protein_coding	HAVANA	120695114	120922608	ENSP00000264808.3|ENSP00000404832.2|ENSP00000422309.1|ENSP00000424861.1|ENSP00000377955.2
ENSG00000239926.1	ENSG00000239926	PRDX3P4	24.4967	0.579831	0.194749	2.97733	0.00290773	0.0247085	chr3	64174401	64175147	+	processed_pseudogene	HAVANA	NA	NA
ENSG00000123131.12	ENSG00000123131	PRDX4	261.275	-0.49857	0.135519	-3.67897	0.00023418	0.0042911	chrX	23664262	23686399	+	protein_coding	HAVANA	23664520	23686332	ENSP00000368654.1|ENSP00000368646.4|ENSP00000368635.3|ENSP00000413736.1
ENSG00000169230.9	ENSG00000169230	PRELID1	118.841	-0.299991	0.0717182	-4.18291	2.88e-05	0.000988088	chr5	177303774	177306959	+	protein_coding	HAVANA	177303986	177306614	ENSP00000302114.4|ENSP00000423873.1|ENSP00000421657.1|ENSP00000427097.1|ENSP00000426351.1
ENSG00000186314.11	ENSG00000186314	PRELID2	73.1147	0.339422	0.109598	3.09698	0.00195502	0.018897	chr5	145471799	145835369	-	protein_coding	HAVANA	145764944	145835251	ENSP00000335675.4|ENSP00000377965.2|ENSP00000424730.1|ENSP00000422789.1
ENSG00000163637.11	ENSG00000163637	PRICKLE2	360.35	0.696344	0.172053	4.04727	5.18e-05	0.00150989	chr3	64093867	64445476	-	protein_coding	HAVANA	64099054	64445372	ENSP00000295902.6|ENSP00000455004.1|ENSP00000419951.1|ENSP00000456173.1
ENSG00000226017.2	ENSG00000226017	PRICKLE2-AS3	52.2278	0.826076	0.170325	4.84999	1.23e-06	0.00010893	chr3	64187544	64200965	+	antisense	HAVANA	NA	NA
ENSG00000154229.11	ENSG00000154229	PRKCA	966.731	0.348718	0.119235	2.92463	0.00344864	0.0278172	chr17	66302636	66810743	+	protein_coding	HAVANA	66302852	66804034	ENSP00000462087.1|ENSP00000408695.3|ENSP00000284384.6
ENSG00000264630.5	ENSG00000264630	PRKCA-AS1	103.13	0.436044	0.146782	2.9707	0.0029712	0.0250791	chr17	66398069	66416854	-	antisense	HAVANA	NA	NA
ENSG00000166501.12	ENSG00000166501	PRKCB	466.026	-0.731615	0.224102	-3.26466	0.00109597	0.0126372	chr16	23836001	24220611	+	protein_coding	HAVANA	23836176	24220110	ENSP00000318315.7|ENSP00000305355.7|ENSP00000454428.1|ENSP00000459227.1|ENSP00000457980.1|ENSP00000458564.1
ENSG00000099256.18	ENSG00000099256	PRTFDC1	49.6287	0.461872	0.12604	3.66447	0.000247847	0.00446579	chr10	24848607	24952604	-	protein_coding	HAVANA	24849847	24952575	ENSP00000318602.5|ENSP00000365558.1|ENSP00000365556.3
ENSG00000125637.15	ENSG00000125637	PSD4	1293.5	-0.414474	0.094379	-4.39159	1.13e-05	0.000516435	chr2	113157325	113209396	+	protein_coding	HAVANA	113182457	113201412	ENSP00000245796.6|ENSP00000413997.2|ENSP00000386373.1|ENSP00000386606.1
ENSG00000277791.4	ENSG00000277791	PSMB3	215.362	-0.21591	0.0598284	-3.60881	0.000307601	0.00519848	chr17	38752736	38764231	+	protein_coding	HAVANA	38752827	38764164	ENSP00000483688.1|ENSP00000478737.1|ENSP00000481215.1|ENSP00000481442.1
ENSG00000125384.6	ENSG00000125384	PTGER2	70.4752	0.547314	0.153585	3.56359	0.000365817	0.00591057	chr14	52314305	52328606	+	protein_coding	HAVANA	52314549	52327451	ENSP00000450933.1|ENSP00000245457.5
ENSG00000241472.6	ENSG00000241472	PTPRG-AS1	41.778	0.445888	0.120783	3.69163	0.000222818	0.00413541	chr3	62260865	62369330	-	processed_transcript	HAVANA	NA	NA
ENSG00000149177.12	ENSG00000149177	PTPRJ	1162.08	-0.328794	0.0640667	-5.13206	2.87e-07	3.94e-05	chr11	47980558	48170841	+	protein_coding	HAVANA|ENSEMBL	47980913	48167359	ENSP00000477933.1|ENSP00000400010.2|ENSP00000479342.1|ENSP00000409733.2|ENSP00000432686.1|ENSP00000435618.1
ENSG00000163661.3	ENSG00000163661	PTX3	17.2914	0.646413	0.209973	3.07855	0.0020801	0.0196738	chr3	157436789	157443628	+	protein_coding	HAVANA	157436934	157442976	ENSP00000295927.3
ENSG00000104524.13	ENSG00000104524	PYCRL	98.5773	-0.30574	0.110738	-2.76092	0.00576389	0.0390721	chr8	143603913	143609773	-	protein_coding	HAVANA	143605703	143609584	ENSP00000220966.6|ENSP00000480945.1|ENSP00000401804.2|ENSP00000404493.2|ENSP00000366802.3|ENSP00000478138.1
ENSG00000163348.3	ENSG00000163348	PYGO2	324.613	-0.183306	0.0510908	-3.58785	0.000333416	0.00550892	chr1	154957026	154963853	-	protein_coding	HAVANA	154958782	154961576	ENSP00000357442.2|ENSP00000357441.1
ENSG00000269386.5	ENSG00000269386	RAB11B-AS1	40.0195	-0.413566	0.15004	-2.75637	0.00584474	0.039412	chr19	8374373	8390685	-	antisense	HAVANA	NA	NA
ENSG00000109113.17	ENSG00000109113	RAB34	178.193	0.410574	0.116214	3.5329	0.000411029	0.00636728	chr17	28714281	28718429	-	protein_coding	HAVANA|ENSEMBL	28714575	28718267	ENSP00000413156.3|ENSP00000378664.3|ENSP00000487160.1|ENSP00000301043.6|ENSP00000391048.1|ENSP00000410279.2|ENSP00000397499.2|ENSP00000378663.2|ENSP00000378666.3|ENSP00000404180.3|ENSP00000407953.2|ENSP00000463488.1|ENSP00000226259.6|ENSP00000398706.1|ENSP00000464723.1|ENSP00000465352.1|ENSP00000476427.1
ENSG00000123570.3	ENSG00000123570	RAB9B	84.908	0.487284	0.157623	3.09146	0.00199177	0.0191228	chrX	103822322	103832228	-	protein_coding	HAVANA	103825182	103825784	ENSP00000243298.2
ENSG00000179262.9	ENSG00000179262	RAD23A	539.321	-0.15559	0.0547578	-2.84141	0.0044914	0.033148	chr19	12945855	12953642	+	protein_coding	HAVANA	12945949	12953046	ENSP00000466243.1|ENSP00000321365.3|ENSP00000467024.1|ENSP00000468674.1|ENSP00000466968.1|ENSP00000466226.1|ENSP00000467628.1
ENSG00000077092.18	ENSG00000077092	RARB	163.38	0.405137	0.0815078	4.97053	6.68e-07	6.86e-05	chr3	25174332	25597932	+	protein_coding	HAVANA	25174398	25596613	ENSP00000373282.4|ENSP00000398840.2|ENSP00000332296.4|ENSP00000391391.1
ENSG00000155903.11	ENSG00000155903	RASA2	432.232	-0.291333	0.0885817	-3.28886	0.00100595	0.0119124	chr3	141487047	141615342	+	protein_coding	HAVANA|ENSEMBL	141487084	141612310	ENSP00000424293.1|ENSP00000286364.3|ENSP00000391677.2
ENSG00000103710.10	ENSG00000103710	RASL12	217.186	0.52553	0.195731	2.68496	0.00725391	0.0455054	chr15	65053337	65076690	-	protein_coding	HAVANA	65054902	65076598	ENSP00000220062.4|ENSP00000390028.3|ENSP00000412787.2
ENSG00000266094.6	ENSG00000266094	RASSF5	307.059	-0.505952	0.149277	-3.38936	0.000700568	0.00917972	chr1	206507530	206589283	+	protein_coding	HAVANA	206507603	206586975	ENSP00000462099.1|ENSP00000462544.1|ENSP00000464039.2|ENSP00000462576.1|ENSP00000474142.1
ENSG00000080839.11	ENSG00000080839	RBL1	148.128	-0.34725	0.100534	-3.45404	0.000552246	0.00777839	chr20	36996349	37095995	-	protein_coding	HAVANA	36998762	37095928	ENSP00000362768.3|ENSP00000343646.3|ENSP00000434711.1|ENSP00000437240.1
ENSG00000259956.1	ENSG00000259956	RBM15B	585.425	-0.2012	0.0745027	-2.70057	0.00692199	0.0441313	chr3	51391268	51397908	+	protein_coding	HAVANA	51391400	51394069	ENSP00000454545.1
ENSG00000203506.5	ENSG00000203506	RBMS3-AS2	111.582	0.403854	0.142394	2.83617	0.00456582	0.0335182	chr3	29526251	29642809	-	antisense	HAVANA	NA	NA
ENSG00000159200.17	ENSG00000159200	RCAN1	273.82	0.321287	0.105686	3.04001	0.0023657	0.0214723	chr21	34513142	34615142	-	protein_coding	HAVANA|ENSEMBL	34518087	34615011	ENSP00000477646.1|ENSP00000370527.4|ENSP00000392438.2|ENSP00000419624.1|ENSP00000417926.1|ENSP00000370524.2|ENSP00000419252.1|ENSP00000382214.1|ENSP00000320768.4|ENSP00000477155.1
ENSG00000250295.6	ENSG00000250295	RDH10-AS1	121.611	0.750068	0.162687	4.6105	4.02e-06	0.000250225	chr8	73297711	73356461	-	antisense	HAVANA	NA	NA
ENSG00000214022.11	ENSG00000214022	REPIN1	645.464	-0.394946	0.097616	-4.04592	5.21e-05	0.0015156	chr7	150368189	150374044	+	protein_coding	HAVANA|ENSEMBL	150368903	150372942	ENSP00000428562.1|ENSP00000420578.1|ENSP00000380451.2|ENSP00000407714.1|ENSP00000418507.1|ENSP00000417291.2|ENSP00000419789.1|ENSP00000417982.1|ENSP00000419872.1|ENSP00000418279.1|ENSP00000428129.1|ENSP00000427721.1|ENSP00000417786.2|ENSP00000388287.2
ENSG00000130988.12	ENSG00000130988	RGN	84.3564	0.637597	0.164133	3.88463	0.000102487	0.00239907	chrX	47078355	47093314	+	protein_coding	HAVANA|ENSEMBL	47081145	47092944	ENSP00000406568.1|ENSP00000380365.1|ENSP00000253303.4|ENSP00000338400.3
ENSG00000148908.14	ENSG00000148908	RGS10	327.593	-0.40912	0.113941	-3.59064	0.000329871	0.00546567	chr10	119499828	119542708	-	protein_coding	HAVANA|ENSEMBL	119500116	119542638	ENSP00000376605.1|ENSP00000358097.3|ENSP00000358099.2
ENSG00000132554.19	ENSG00000132554	RGS22	146.09	0.785516	0.163447	4.80593	1.54e-06	0.000126098	chr8	99960936	100131268	-	protein_coding	HAVANA|ENSEMBL	99961189	100131164	ENSP00000354109.6|ENSP00000479205.1|ENSP00000429382.1|ENSP00000430378.1|ENSP00000428212.1|ENSP00000427754.1|ENSP00000427798.1|ENSP00000429198.1|ENSP00000430903.1|ENSP00000427930.1
ENSG00000186479.4	ENSG00000186479	RGS7BP	119.806	0.548177	0.151958	3.60743	0.000309247	0.00521961	chr5	64506257	64612312	+	protein_coding	HAVANA	64506625	64609249	ENSP00000334851.2
ENSG00000139725.7	ENSG00000139725	RHOF	46.2372	-0.326577	0.109639	-2.97867	0.00289501	0.0246354	chr12	121777754	121803403	-	protein_coding	HAVANA	121779501	121793633	ENSP00000267205.2|ENSP00000476444.1|ENSP00000476987.1|ENSP00000477391.1|ENSP00000476574.1|ENSP00000440397.1
ENSG00000158106.12	ENSG00000158106	RHPN1	168.837	-0.613084	0.126906	-4.83101	1.36e-06	0.000116367	chr8	143368855	143384220	+	protein_coding	HAVANA|ENSEMBL	143368988	143382648	ENSP00000484724.1|ENSP00000289013.6
ENSG00000104312.7	ENSG00000104312	RIPK2	174.785	-0.26934	0.0900303	-2.99166	0.00277464	0.0239358	chr8	89757747	89791063	+	protein_coding	HAVANA	89758061	89790413	ENSP00000220751.4|ENSP00000429271.1|ENSP00000427736.1
ENSG00000115841.19	ENSG00000115841	RMDN2	120.61	0.245059	0.0679414	3.60692	0.000309856	0.0052259	chr2	37923187	38067142	+	protein_coding	HAVANA|ENSEMBL	37929278	38066987	ENSP00000393705.1|ENSP00000346549.2|ENSP00000399495.1|ENSP00000386004.1|ENSP00000385049.1|ENSP00000392977.2|ENSP00000234195.3|ENSP00000416367.1|ENSP00000385529.3|ENSP00000406331.1
ENSG00000202198.1	ENSG00000202198	RN7SK	112271	-0.32169	0.0942613	-3.41275	0.000643116	0.00866464	chr6	52995620	52995950	+	misc_RNA	ENSEMBL	NA	NA
ENSG00000128482.15	ENSG00000128482	RNF112	72.1323	0.757367	0.212997	3.55575	0.000376896	0.00602299	chr17	19411125	19417276	+	protein_coding	HAVANA	19411409	19416172	ENSP00000464134.1|ENSP00000454919.1
ENSG00000133874.1	ENSG00000133874	RNF122	69.1398	0.370741	0.131923	2.81029	0.00494976	0.0352841	chr8	33547755	33567125	-	protein_coding	HAVANA	33548756	33566723	ENSP00000256257.1
ENSG00000168159.10	ENSG00000168159	RNF187	574.125	-0.264204	0.0777787	-3.39686	0.000681631	0.00900888	chr1	228487061	228495766	+	protein_coding	HAVANA	228487489	228493274	ENSP00000306396.8
ENSG00000034677.11	ENSG00000034677	RNF19A	701.759	-0.296314	0.0870555	-3.40373	0.000664719	0.00884861	chr8	100257059	100410015	-	protein_coding	HAVANA|ENSEMBL	100258559	100288174	ENSP00000480369.1|ENSP00000428968.1|ENSP00000342667.2|ENSP00000431077.1|ENSP00000429549.1|ENSP00000429841.1|ENSP00000429161.1|ENSP00000397305.2|ENSP00000430553.1
ENSG00000236548.1	ENSG00000236548	RNF217-AS1	38.6582	0.356027	0.134848	2.64021	0.00828553	0.0495257	chr6	124909093	124963039	-	antisense	HAVANA	NA	NA
ENSG00000146083.11	ENSG00000146083	RNF44	504.329	-0.412857	0.0807678	-5.11166	3.19e-07	4.2e-05	chr5	176526697	176538025	-	protein_coding	HAVANA	176529031	176532472	ENSP00000274811.4|ENSP00000425253.1|ENSP00000427604.1|ENSP00000424699.1
ENSG00000142327.11	ENSG00000142327	RNPEPL1	295.829	-0.252666	0.0590094	-4.28179	1.85e-05	0.000720844	chr2	240565804	240581372	+	protein_coding	HAVANA	240573134	240577889	ENSP00000414661.1|ENSP00000270357.3|ENSP00000403319.1
ENSG00000206908.1	ENSG00000206908	RNU1-136P	37.6246	0.626948	0.23728	2.64223	0.0082361	0.0493397	chr6	53219261	53219424	+	snRNA	ENSEMBL	NA	NA
ENSG00000206820.1	ENSG00000206820	RNU1-138P	78.6217	0.620893	0.228147	2.72146	0.00649937	0.0423621	chr4	113420323	113420486	+	snRNA	ENSEMBL	NA	NA
ENSG00000200184.1	ENSG00000200184	RNU1-20P	150.347	0.737881	0.244919	3.01276	0.00258884	0.0228083	chr3	192729555	192729716	-	snRNA	ENSEMBL	NA	NA
ENSG00000206917.1	ENSG00000206917	RNU1-52P	31.8067	0.66565	0.250029	2.66229	0.00776111	0.047472	chr17	58677574	58677737	-	snRNA	ENSEMBL	NA	NA
ENSG00000212550.1	ENSG00000212550	RNU1-78P	22.7312	0.610696	0.209368	2.91685	0.00353582	0.0283017	chr15	45002864	45003028	-	snRNA	ENSEMBL	NA	NA
ENSG00000200997.1	ENSG00000200997	RNU1-85P	30.4324	0.667569	0.243951	2.73648	0.00620998	0.0411542	chr17	58679527	58679690	-	snRNA	ENSEMBL	NA	NA
ENSG00000252763.1	ENSG00000252763	RNU2-31P	13.0648	0.661712	0.201122	3.29011	0.00100149	0.0118914	chr3	159808416	159808570	-	snRNA	ENSEMBL	NA	NA
ENSG00000223001.1	ENSG00000223001	RNU2-61P	127.183	0.705198	0.257812	2.73532	0.00623193	0.0412491	chr6	89063500	89063690	-	snRNA	ENSEMBL	NA	NA
ENSG00000252487.1	ENSG00000252487	RNY4P20	12.4579	0.458699	0.172107	2.66519	0.00769444	0.0472451	chr6	151298841	151298933	-	misc_RNA	ENSEMBL	NA	NA
ENSG00000215720.4	ENSG00000215720	RP1-21O18.3	16.8373	0.420651	0.144508	2.91092	0.00360368	0.0286902	chr1	15191828	15192845	-	processed_pseudogene	HAVANA	NA	NA
ENSG00000234567.1	ENSG00000234567	RP1-283K11.2	9.35659	0.925899	0.239468	3.86648	0.000110419	0.00253649	chr6	133452857	133456605	-	antisense	HAVANA	NA	NA
ENSG00000235834.1	ENSG00000235834	RP1-60N8.1	25.0482	0.465627	0.156067	2.98352	0.00284957	0.0243732	chrX	17528435	17587160	+	sense_intronic	HAVANA	NA	NA
ENSG00000267501.1	ENSG00000267501	RP11-108P20.2	111.626	-1.23534	0.408408	-3.02477	0.00248819	0.0222356	chr18	58754859	58757842	-	lincRNA	HAVANA	NA	NA
ENSG00000267074.1	ENSG00000267074	RP11-1094M14.5	16.1895	-0.863927	0.22688	-3.80785	0.000140177	0.00300008	chr17	35499690	35510270	-	sense_intronic	HAVANA	NA	NA
ENSG00000273125.1	ENSG00000273125	RP11-115H18.1	15.4843	0.854035	0.198348	4.30574	1.66e-05	0.000669105	chr3	107430930	107463912	+	lincRNA	HAVANA	NA	NA
ENSG00000253816.3	ENSG00000253816	RP11-1415C14.3	38.1012	-0.537997	0.178769	-3.00946	0.00261716	0.0229892	chr5	70219918	70258930	-	unprocessed_pseudogene	HAVANA	NA	NA
ENSG00000255248.6	ENSG00000255248	RP11-166D19.1	498.252	0.609198	0.169088	3.60284	0.000314763	0.00527851	chr11	122028355	122116323	-	sense_overlapping	HAVANA	NA	NA
ENSG00000259683.1	ENSG00000259683	RP11-182J1.14	38.2059	0.596187	0.145503	4.09741	4.18e-05	0.00128875	chr15	84389729	84395903	+	unprocessed_pseudogene	HAVANA	NA	NA
ENSG00000274308.1	ENSG00000274308	RP11-19G24.1	37.0453	-0.573974	0.186745	-3.07357	0.00211516	0.0199146	chr17	37140611	37141424	-	processed_pseudogene	HAVANA	NA	NA
ENSG00000279237.1	ENSG00000279237	RP11-212E4.1	34.2072	0.650283	0.215355	3.01959	0.0025312	0.02247	chr13	110265251	110266113	-	TEC	HAVANA	NA	NA
ENSG00000279976.1	ENSG00000279976	RP11-243M5.4	9.20962	0.665385	0.246544	2.69884	0.00695809	0.0442959	chr12	130962175	130963028	+	TEC	HAVANA	NA	NA
ENSG00000260859.1	ENSG00000260859	RP11-254F19.2	60.1416	0.788012	0.233349	3.37697	0.000732894	0.00949375	chr16	84828263	84829242	+	sense_intronic	HAVANA	NA	NA
ENSG00000275367.1	ENSG00000275367	RP11-266K4.14	39.9087	0.463639	0.148089	3.13081	0.00174325	0.017411	chr12	8217758	8221115	+	lincRNA	HAVANA	NA	NA
ENSG00000277639.1	ENSG00000277639	RP11-295M3.4	21.6987	1.06011	0.201992	5.2483	1.54e-07	2.58e-05	chr16	53043066	53044216	-	lincRNA	HAVANA	NA	NA
ENSG00000277382.1	ENSG00000277382	RP11-318A15.8	12.9939	0.616408	0.176852	3.48545	0.000491303	0.00718841	chr17	76709760	76710045	+	antisense	HAVANA	NA	NA
ENSG00000255159.1	ENSG00000255159	RP11-318C2.1	47.81	0.453268	0.115528	3.92344	8.73e-05	0.00215506	chr11	8768778	8810231	+	antisense	HAVANA	NA	NA
ENSG00000280551.1	ENSG00000280551	RP11-358D17.2	79.9621	0.424835	0.14287	2.97357	0.00294354	0.0249352	chr4	119042024	119043937	+	TEC	HAVANA	NA	NA
ENSG00000271778.1	ENSG00000271778	RP11-379F4.8	18.2366	0.536171	0.158147	3.39034	0.000698054	0.00915761	chr3	158782547	158783124	+	sense_intronic	HAVANA	NA	NA
ENSG00000225761.1	ENSG00000225761	RP11-417O11.5	16.3478	0.468904	0.164394	2.85232	0.00434017	0.0324152	chr10	74005137	74027915	+	sense_intronic	HAVANA	NA	NA
ENSG00000241218.1	ENSG00000241218	RP11-446H18.1	19.5885	0.578816	0.208148	2.78079	0.00542275	0.0375968	chr3	107327830	107329197	-	processed_pseudogene	HAVANA	NA	NA
ENSG00000239828.6	ENSG00000239828	RP11-446H18.5	99.4793	0.892936	0.22583	3.95401	7.69e-05	0.00199393	chr3	107272611	107421304	-	lincRNA	HAVANA	NA	NA
ENSG00000271917.1	ENSG00000271917	RP11-506O24.2	38.2578	0.338522	0.1193	2.83757	0.00454579	0.0334433	chr1	164828436	164829952	+	sense_intronic	HAVANA	NA	NA
ENSG00000260530.1	ENSG00000260530	RP11-558A11.2	17.3567	0.972641	0.220667	4.40774	1.04e-05	0.000488001	chr16	84295498	84296985	-	antisense	HAVANA	NA	NA
ENSG00000239455.1	ENSG00000239455	RP11-561O4.1	28.2344	0.54942	0.170709	3.21846	0.00128882	0.0141639	chr3	107104911	107107000	-	processed_pseudogene	HAVANA	NA	NA
ENSG00000274253.4	ENSG00000274253	RP11-566K19.6	16.5784	0.695849	0.181168	3.84091	0.000122579	0.00272262	chr15	22757857	22778741	+	sense_overlapping	HAVANA	NA	NA
ENSG00000275465.5	ENSG00000275465	RP11-569G13.3	21.4497	1.13556	0.254285	4.46571	7.98e-06	0.000406006	chr9	96106661	96116411	-	lincRNA	HAVANA	NA	NA
ENSG00000279806.1	ENSG00000279806	RP11-58O9.2	29.2192	0.704968	0.185095	3.80867	0.000139717	0.00299657	chr17	40473554	40475289	-	TEC	HAVANA	NA	NA
ENSG00000277152.1	ENSG00000277152	RP11-622C24.2	123.806	0.438826	0.124084	3.53653	0.000405414	0.00631185	chr15	66860303	66867023	+	lincRNA	HAVANA	NA	NA
ENSG00000255545.7	ENSG00000255545	RP11-627G23.1	287.923	0.683901	0.24036	2.84532	0.00443668	0.0329029	chr11	134436473	134505661	+	processed_transcript	HAVANA	NA	NA
ENSG00000279384.1	ENSG00000279384	RP11-635L1.2	108.407	0.671145	0.175652	3.82087	0.00013298	0.00289271	chr4	168843988	168844735	+	TEC	HAVANA	NA	NA
ENSG00000262003.1	ENSG00000262003	RP11-676J12.7	67.268	0.462563	0.119662	3.86557	0.000110831	0.00254464	chr17	909632	911212	+	antisense	HAVANA	NA	NA
ENSG00000261054.1	ENSG00000261054	RP11-6O2.4	20.7468	0.828874	0.243918	3.39816	0.00067841	0.00897548	chr15	99128832	99131806	-	antisense	HAVANA	NA	NA
ENSG00000256594.7	ENSG00000256594	RP11-705C15.2	140.025	-0.624933	0.162247	-3.85174	0.000117284	0.00264345	chr12	9617284	9658412	+	transcribed_unprocessed_pseudogene	HAVANA	NA	NA
ENSG00000271474.1	ENSG00000271474	RP11-710C12.1	24.7646	0.418445	0.152907	2.73661	0.00620766	0.041145	chr4	95549129	95552457	+	antisense	HAVANA	NA	NA
ENSG00000254528.7	ENSG00000254528	RP11-728F11.4	19.1102	0.4668	0.169536	2.75341	0.00589787	0.0396676	chr11	117833719	117838942	+	antisense	HAVANA	NA	NA
ENSG00000235790.7	ENSG00000235790	RP11-73M7.6	54.2752	0.516915	0.152967	3.37925	0.000726834	0.00943457	chr1	31644049	31660162	+	antisense	HAVANA	NA	NA
ENSG00000236241.1	ENSG00000236241	RP11-744O11.2	69.4848	-1.09103	0.239188	-4.5614	5.08e-06	0.000296505	chr3	175675087	175676801	-	processed_pseudogene	HAVANA	NA	NA
ENSG00000240163.1	ENSG00000240163	RP11-745A24.1	8.74701	0.785799	0.156085	5.03442	4.79e-07	5.54e-05	chr15	60390371	60390682	+	processed_pseudogene	HAVANA	NA	NA
ENSG00000258086.1	ENSG00000258086	RP11-753H16.5	35.8756	0.956215	0.199942	4.78246	1.73e-06	0.000137442	chr12	54353792	54466985	+	antisense	HAVANA	NA	NA
ENSG00000274964.1	ENSG00000274964	RP11-817I4.1	78.5488	-0.477482	0.154135	-3.09781	0.00194957	0.0188648	chr12	32339368	32340724	+	sense_intronic	HAVANA	NA	NA
ENSG00000276115.1	ENSG00000276115	RP11-817I4.2	113.715	-0.713109	0.170653	-4.17871	2.93e-05	0.00100184	chr12	32352349	32354144	+	sense_intronic	HAVANA	NA	NA
ENSG00000258400.1	ENSG00000258400	RP11-831F12.2	11.4778	0.390287	0.129215	3.02046	0.00252395	0.0224284	chr14	49707667	49708792	-	antisense	HAVANA	NA	NA
ENSG00000280032.1	ENSG00000280032	RP11-832A4.7	38.9327	1.05801	0.229258	4.61495	3.93e-06	0.000246864	chr11	118264593	118266817	+	TEC	HAVANA	NA	NA
ENSG00000279660.1	ENSG00000279660	RP11-849N15.3	10.2186	0.559933	0.208427	2.68648	0.00722103	0.0453635	chr17	15260513	15261841	+	TEC	HAVANA	NA	NA
ENSG00000280153.1	ENSG00000280153	RP11-876N24.3	62.0795	-0.792896	0.180899	-4.38308	1.17e-05	0.000531963	chr16	10933903	10936280	+	TEC	HAVANA	NA	NA
ENSG00000233178.7	ENSG00000233178	RP11-88I18.2	158.285	0.549163	0.164615	3.33604	0.000849808	0.0105633	chr9	68393881	68406500	-	antisense	HAVANA	NA	NA
ENSG00000229019.1	ENSG00000229019	RP11-88I18.3	27.0657	0.671861	0.195613	3.43465	0.000593321	0.00818617	chr9	68426843	68429369	+	sense_intronic	HAVANA	NA	NA
ENSG00000258134.1	ENSG00000258134	RP11-956A19.1	32.3356	-0.485675	0.167199	-2.90477	0.0036752	0.0290196	chr12	32227410	32228154	-	processed_pseudogene	HAVANA	NA	NA
ENSG00000272505.1	ENSG00000272505	RP11-981G7.6	29.2094	0.419214	0.112689	3.72009	0.000199149	0.0038169	chr8	10486807	10489666	+	lincRNA	HAVANA	NA	NA
ENSG00000250241.5	ENSG00000250241	RP11-9G1.3	37.8005	0.558823	0.210469	2.65514	0.0079276	0.0481272	chr4	133075311	133149116	-	lincRNA	HAVANA	NA	NA
ENSG00000257298.1	ENSG00000257298	RP3-405J10.3	143.087	0.349769	0.0841772	4.15515	3.25e-05	0.00107682	chr12	50185580	50191363	-	sense_intronic	HAVANA	NA	NA
ENSG00000273387.1	ENSG00000273387	RP3-412A9.16	41.1606	0.7182	0.145706	4.9291	8.26e-07	8.08e-05	chr22	31082156	31083565	-	antisense	HAVANA	NA	NA
ENSG00000275894.1	ENSG00000275894	RP3-453C12.14	15.7157	0.756686	0.170552	4.4367	9.13e-06	0.000444581	chr20	45345115	45345823	-	sense_intronic	HAVANA	NA	NA
ENSG00000223583.1	ENSG00000223583	RP3-476K8.4	17.7424	-0.391734	0.114505	-3.42109	0.000623696	0.00849673	chr1	26454653	26455187	-	processed_pseudogene	HAVANA	NA	NA
ENSG00000236166.1	ENSG00000236166	RP3-523C21.2	11.5799	0.918025	0.194135	4.72879	2.26e-06	0.000167562	chr6	132085084	132099279	+	lincRNA	HAVANA	NA	NA
ENSG00000261116.1	ENSG00000261116	RP3-523K23.2	11.9958	1.05917	0.217091	4.87889	1.07e-06	9.8e-05	chr6	54943167	54945099	+	sense_overlapping	HAVANA	NA	NA
ENSG00000223695.1	ENSG00000223695	RP4-633O19__A.1	10.3965	0.497728	0.187608	2.65302	0.00797747	0.0483396	chr22	36388626	36396517	+	lincRNA	HAVANA	NA	NA
ENSG00000235501.5	ENSG00000235501	RP4-639F20.1	55.9234	0.341246	0.127208	2.68258	0.00730575	0.045727	chr1	94927566	94963270	+	antisense	HAVANA	NA	NA
ENSG00000179447.2	ENSG00000179447	RP5-1027G4.3	32.7208	0.585104	0.149691	3.90874	9.28e-05	0.00224745	chr20	19242302	19284596	-	antisense	HAVANA	NA	NA
ENSG00000275142.1	ENSG00000275142	RP5-999L4.2	16.7169	0.328828	0.118918	2.76517	0.00568934	0.0387475	chr20	19871891	19872284	+	lincRNA	HAVANA	NA	NA
ENSG00000269902.1	ENSG00000269902	RP6-99M1.3	26.7789	0.82406	0.208624	3.94999	7.82e-05	0.0020076	chrX	45764772	45765299	-	lincRNA	HAVANA	NA	NA
ENSG00000269609.5	ENSG00000269609	RPARP-AS1	227.268	-0.327413	0.0982515	-3.3324	0.000861011	0.0106667	chr10	102449817	102461106	+	processed_transcript	HAVANA	NA	NA
ENSG00000114391.12	ENSG00000114391	RPL24	1795.07	-0.269367	0.0842501	-3.19723	0.00138753	0.0148982	chr3	101681091	101686782	-	protein_coding	HAVANA	101681138	101686676	ENSP00000377640.3|ENSP00000419179.1|ENSP00000420380.1
ENSG00000166441.12	ENSG00000166441	RPL27A	2382.03	-0.247287	0.0731911	-3.37864	0.000728442	0.0094499	chr11	8682411	8714759	+	protein_coding	HAVANA	8682814	8685803	ENSP00000346015.5|ENSP00000433259.1|ENSP00000431849.1|ENSP00000435333.1|ENSP00000435081.1|ENSP00000432671.1|ENSP00000431565.1|ENSP00000437118.1|ENSP00000433766.1
ENSG00000108107.12	ENSG00000108107	RPL28	2072.48	-0.237579	0.0898067	-2.64545	0.00815815	0.0490652	chr19	55385345	55403250	+	protein_coding	HAVANA	55386358	55403128	ENSP00000342787.2|ENSP00000400596.2|ENSP00000391665.2|ENSP00000452909.1|ENSP00000453029.1|ENSP00000452763.1|ENSP00000453319.1|ENSP00000453285.1|ENSP00000453584.1
ENSG00000156482.10	ENSG00000156482	RPL30	1718.1	-0.252902	0.0818084	-3.09139	0.00199223	0.019123	chr8	98024851	98046469	-	protein_coding	HAVANA	98041804	98045367	ENSP00000428085.1|ENSP00000379381.2|ENSP00000430556.1|ENSP00000287038.3|ENSP00000430506.1|ENSP00000429483.1
ENSG00000136942.14	ENSG00000136942	RPL35	1918.81	-0.28973	0.0884235	-3.27662	0.00105057	0.012267	chr9	124857880	124861981	-	protein_coding	HAVANA|ENSEMBL	124857921	124861912	ENSP00000362671.4|ENSP00000437215.1|ENSP00000259469.4|ENSP00000486088.1
ENSG00000198918.7	ENSG00000198918	RPL39	803.363	-0.398201	0.098266	-4.05227	5.07e-05	0.00148675	chrX	119786504	119791643	-	protein_coding	HAVANA	119786687	119791576	ENSP00000355315.3
ENSG00000227939.1	ENSG00000227939	RPL3P2	33.8529	0.304782	0.113706	2.68043	0.00735275	0.045885	chr6	31280317	31281519	+	processed_pseudogene	HAVANA	NA	NA
ENSG00000213891.3	ENSG00000213891	RPL3P6	56.4604	0.393538	0.0989548	3.97695	6.98e-05	0.00187938	chr5	61390668	61391871	-	processed_pseudogene	HAVANA	NA	NA
ENSG00000089009.15	ENSG00000089009	RPL6	2581.28	-0.237276	0.0876095	-2.70834	0.00676205	0.043464	chr12	112405190	112418838	-	protein_coding	HAVANA	112405227	112408656	ENSP00000202773.9|ENSP00000403172.2|ENSP00000448570.1|ENSP00000476161.1|ENSP00000446883.1|ENSP00000448067.2|ENSP00000449486.2|ENSP00000446859.1
ENSG00000235552.4	ENSG00000235552	RPL6P27	41.0016	-0.282546	0.095836	-2.94822	0.00319608	0.0264039	chr18	6462144	6463015	-	transcribed_processed_pseudogene	HAVANA	NA	NA
ENSG00000177600.8	ENSG00000177600	RPLP2	4590.92	-0.343332	0.0894111	-3.83992	0.000123074	0.00273088	chr11	809647	812880	+	protein_coding	HAVANA	810235	812833	ENSP00000322419.4|ENSP00000431240.1|ENSP00000433443.1
ENSG00000163902.11	ENSG00000163902	RPN1	1454.11	-0.3965	0.106925	-3.70819	0.000208743	0.00394917	chr3	128619970	128681075	-	protein_coding	HAVANA	128620414	128650800	ENSP00000296255.3|ENSP00000417529.1|ENSP00000419384.1
ENSG00000177519.3	ENSG00000177519	RPRM	34.5175	0.683108	0.207483	3.29236	0.000993518	0.0118348	chr2	153477338	153478808	-	protein_coding	HAVANA	153478239	153478565	ENSP00000314946.3
ENSG00000115268.9	ENSG00000115268	RPS15	1246.98	-0.275	0.0963831	-2.85319	0.00432825	0.0323534	chr19	1438358	1440494	+	protein_coding	HAVANA	1438426	1440459	ENSP00000473953.1|ENSP00000467676.2|ENSP00000467466.3|ENSP00000474970.2|ENSP00000474433.2|ENSP00000475096.1|ENSP00000467855.2|ENSP00000474543.1|ENSP00000466010.1|ENSP00000465055.2|ENSP00000483399.1|ENSP00000466366.2
ENSG00000239218.2	ENSG00000239218	RPS20P22	45.8096	0.429592	0.160067	2.68383	0.00727837	0.0456137	chr8	38434347	38435664	-	transcribed_processed_pseudogene	HAVANA	NA	NA
ENSG00000177954.11	ENSG00000177954	RPS27	2086.24	-0.356245	0.0893403	-3.98751	6.68e-05	0.00180869	chr1	153990759	153992150	+	protein_coding	HAVANA	153990797	153992090	ENSP00000357555.4|ENSP00000376341.4
ENSG00000143947.12	ENSG00000143947	RPS27A	3721.91	-0.237414	0.0837163	-2.83594	0.00456912	0.0335369	chr2	55231903	55235853	+	protein_coding	HAVANA	55232825	55235574	ENSP00000383981.3|ENSP00000272317.6|ENSP00000408482.1|ENSP00000385659.1
ENSG00000214389.2	ENSG00000214389	RPS3AP26	39.8312	-0.350737	0.12326	-2.8455	0.00443415	0.0328896	chr7	98385801	98386584	-	processed_pseudogene	HAVANA	NA	NA
ENSG00000242607.1	ENSG00000242607	RPS3AP34	21.9881	0.412184	0.143018	2.88204	0.00395109	0.0304171	chr8	12570350	12571130	-	processed_pseudogene	HAVANA	NA	NA
ENSG00000117676.13	ENSG00000117676	RPS6KA1	385.145	-0.241048	0.0797043	-3.02428	0.00249227	0.0222541	chr1	26529761	26575030	+	protein_coding	HAVANA	26529921	26574440	ENSP00000434616.1|ENSP00000436990.1|ENSP00000363283.2|ENSP00000363281.4|ENSP00000431651.1|ENSP00000433039.1|ENSP00000432281.1|ENSP00000355831.4|ENSP00000363278.1|ENSP00000435412.1|ENSP00000383967.2|ENSP00000403548.1
ENSG00000263266.2	ENSG00000263266	RPS7P1	72.5673	-0.313784	0.109157	-2.87461	0.00404527	0.0309218	chr17	28467822	28468406	+	processed_pseudogene	HAVANA	NA	NA
ENSG00000168028.13	ENSG00000168028	RPSA	1761.26	-0.324586	0.0992306	-3.27103	0.00107158	0.0124369	chr3	39406689	39412542	+	protein_coding	HAVANA	39407654	39412365	ENSP00000346067.4|ENSP00000410848.1|ENSP00000389351.1|ENSP00000396716.2
ENSG00000225178.5	ENSG00000225178	RPSAP58	68.7969	-0.483018	0.145973	-3.30896	0.000936434	0.0113254	chr19	23827162	23828049	+	processed_pseudogene	HAVANA	NA	NA
ENSG00000254656.1	ENSG00000254656	RTL1	40.7178	0.772951	0.185408	4.16893	3.06e-05	0.00103638	chr14	100880655	100884847	-	protein_coding	HAVANA	100880715	100884788	ENSP00000435342.1
ENSG00000213694.3	ENSG00000213694	S1PR3	329.991	0.549995	0.119566	4.59994	4.23e-06	0.000259598	chr9	88991447	89005010	+	protein_coding	HAVANA	89001201	89002334	ENSP00000350878.2|ENSP00000365006.3
ENSG00000140497.16	ENSG00000140497	SCAMP2	440.783	-0.152653	0.0501671	-3.04288	0.00234322	0.0213274	chr15	74843730	74873365	-	protein_coding	HAVANA	74845086	74873255	ENSP00000268099.9|ENSP00000455377.1|ENSP00000455963.1|ENSP00000454741.1|ENSP00000454464.1|ENSP00000457890.1|ENSP00000457564.1
ENSG00000116521.10	ENSG00000116521	SCAMP3	243.153	-0.190825	0.0472993	-4.0344	5.47e-05	0.00157101	chr1	155255979	155262430	-	protein_coding	HAVANA	155256276	155262151	ENSP00000307275.3|ENSP00000347540.3
ENSG00000114650.18	ENSG00000114650	SCAP	616.356	-0.202841	0.0621865	-3.26182	0.00110701	0.012728	chr3	47413694	47477126	-	protein_coding	HAVANA|ENSEMBL	47413857	47442993	ENSP00000401819.2|ENSP00000324296.6|ENSP00000416847.3|ENSP00000265565.5|ENSP00000438956.2|ENSP00000409183.1|ENSP00000408102.1|ENSP00000423419.1|ENSP00000415195.1
ENSG00000249784.1	ENSG00000249784	SCARNA22	154.884	-0.576362	0.202825	-2.84168	0.0044877	0.033137	chr4	1974636	1974760	+	scaRNA	ENSEMBL	NA	NA
ENSG00000099194.5	ENSG00000099194	SCD	2301.83	-0.677343	0.225812	-2.99958	0.00270349	0.0234912	chr10	100347124	100364834	+	protein_coding	HAVANA	100347505	100360930	ENSP00000359380.2
ENSG00000180900.16	ENSG00000180900	SCRIB	668.084	-0.228443	0.0776919	-2.94036	0.00327826	0.026856	chr8	143790920	143815379	-	protein_coding	HAVANA	143791166	143815372	ENSP00000349486.2|ENSP00000322938.3|ENSP00000431519.1|ENSP00000366756.3|ENSP00000433546.1
ENSG00000205138.3	ENSG00000205138	SDHAF1	57.441	-0.205353	0.0603336	-3.40362	0.000664983	0.00884861	chr19	35995199	35996315	+	protein_coding	HAVANA	35995275	35995619	ENSP00000368165.2
ENSG00000148396.18	ENSG00000148396	SEC16A	2655.2	-0.307729	0.0929121	-3.31204	0.000926172	0.0112438	chr9	136440096	136483759	-	protein_coding	HAVANA|ENSEMBL	136441758	136477615	ENSP00000325827.7|ENSP00000290037.7|ENSP00000277537.6|ENSP00000403525.1|ENSP00000360771.3|ENSP00000317437.5|ENSP00000387583.2
ENSG00000058262.9	ENSG00000058262	SEC61A1	1673.68	-0.321911	0.113083	-2.84668	0.00441779	0.0327903	chr3	128051641	128071683	+	protein_coding	HAVANA	128051886	128069659	ENSP00000418493.1|ENSP00000243253.3|ENSP00000419172.1|ENSP00000411445.2
ENSG00000106803.9	ENSG00000106803	SEC61B	266.05	-0.32425	0.0819469	-3.95683	7.59e-05	0.0019838	chr9	99222064	99230615	+	protein_coding	HAVANA	99222364	99230421	ENSP00000474122.1|ENSP00000223641.4
ENSG00000091490.10	ENSG00000091490	SEL1L3	724.525	-0.54164	0.167539	-3.23291	0.00122537	0.013674	chr4	25747427	25863760	-	protein_coding	HAVANA	25748428	25863512	ENSP00000382767.3|ENSP00000264868.5|ENSP00000425438.1|ENSP00000421701.1|ENSP00000426050.1|ENSP00000424564.1|ENSP00000423743.1|ENSP00000421567.1|ENSP00000420951.1
ENSG00000120742.10	ENSG00000120742	SERP1	1661.92	-0.327262	0.121979	-2.68294	0.00729776	0.0456899	chr3	150541994	150603228	-	protein_coding	HAVANA|ENSEMBL	150544418	150546135	ENSP00000239944.2|ENSP00000420076.1|ENSP00000420002.1|ENSP00000419472.1
ENSG00000206075.13	ENSG00000206075	SERPINB5	46.0911	1.08302	0.214149	5.05733	4.25e-07	5.13e-05	chr18	63476761	63505085	+	protein_coding	HAVANA	63484429	63503719	ENSP00000372221.4|ENSP00000467158.1|ENSP00000408821.1
ENSG00000170542.5	ENSG00000170542	SERPINB9	237.301	-0.567423	0.194515	-2.91711	0.0035329	0.0282997	chr6	2887266	2903280	-	protein_coding	HAVANA	2890166	2900611	ENSP00000370074.4
ENSG00000082497.11	ENSG00000082497	SERTAD4	92.97	0.406156	0.14884	2.72881	0.00635639	0.0417868	chr1	210232799	210246631	+	protein_coding	HAVANA	210237961	210242334	ENSP00000355979.3
ENSG00000102683.7	ENSG00000102683	SGCG	16.8329	0.65166	0.231179	2.81885	0.00481955	0.0346797	chr13	23180952	23325165	+	protein_coding	HAVANA	23203695	23324538	ENSP00000218867.3
ENSG00000142669.13	ENSG00000142669	SH3BGRL3	231.033	-0.3892	0.097891	-3.97585	7.01e-05	0.00188236	chr1	26279176	26281522	+	protein_coding	HAVANA|ENSEMBL	26279755	26281120	ENSP00000479107.1|ENSP00000270792.5|ENSP00000363358.3
ENSG00000179526.16	ENSG00000179526	SHARPIN	228.109	-0.180744	0.0601981	-3.00248	0.00267786	0.0233392	chr8	144098633	144108124	-	protein_coding	HAVANA	144098881	144103753	ENSP00000432355.1|ENSP00000381698.2|ENSP00000352551.6
ENSG00000182199.10	ENSG00000182199	SHMT2	222.969	-0.348997	0.090307	-3.86456	0.00011129	0.0025486	chr12	57229327	57234935	+	protein_coding	HAVANA	57229779	57234358	ENSP00000333667.3|ENSP00000451169.1|ENSP00000452315.1|ENSP00000450930.1|ENSP00000452035.1|ENSP00000450594.1|ENSP00000451630.1|ENSP00000450610.1|ENSP00000406881.3|ENSP00000450927.1|ENSP00000450452.1|ENSP00000452161.1|ENSP00000450893.1|ENSP00000452045.1|ENSP00000452419.1|ENSP00000451968.1|ENSP00000452404.1|ENSP00000413770.3|ENSP00000451872.1|ENSP00000452339.1|ENSP00000451371.1|ENSP00000452163.1|ENS…
ENSG00000141469.16	ENSG00000141469	SLC14A1	321.977	1.08087	0.226142	4.77962	1.76e-06	0.000138558	chr18	45724127	45752520	+	protein_coding	HAVANA|ENSEMBL	45727272	45752259	ENSP00000318546.4|ENSP00000479595.1|ENSP00000465029.1|ENSP00000442180.1|ENSP00000465702.1|ENSP00000466273.2|ENSP00000412309.2|ENSP00000441998.1|ENSP00000385320.2|ENSP00000467898.2|ENSP00000470055.1|ENSP00000390637.2|ENSP00000466093.1|ENSP00000468763.1|ENSP00000470476.1|ENSP00000465044.1|ENSP00000465150.1
ENSG00000115902.10	ENSG00000115902	SLC1A4	415.777	-0.343821	0.0851087	-4.03978	5.35e-05	0.00154465	chr2	64988477	65023865	+	protein_coding	HAVANA	64989644	65021143	ENSP00000431942.1|ENSP00000234256.3
ENSG00000144659.10	ENSG00000144659	SLC25A38	262.835	-0.242197	0.0804644	-3.00999	0.00261259	0.0229606	chr3	39383348	39397351	+	protein_coding	HAVANA	39383725	39396517	ENSP00000273158.3|ENSP00000394244.1
ENSG00000013306.15	ENSG00000013306	SLC25A39	345.412	-0.383638	0.0892274	-4.29955	1.71e-05	0.000681969	chr17	44319625	44324870	-	protein_coding	HAVANA	44320004	44323562	ENSP00000225308.8|ENSP00000366299.4|ENSP00000467681.1|ENSP00000466676.1|ENSP00000467964.1|ENSP00000444540.1|ENSP00000466615.1|ENSP00000465182.1|ENSP00000465554.1|ENSP00000465594.1|ENSP00000467956.1|ENSP00000466144.1
ENSG00000181035.13	ENSG00000181035	SLC25A42	201.343	-0.268663	0.0922255	-2.91311	0.00357845	0.0285805	chr19	19063999	19112888	+	protein_coding	HAVANA	19096125	19110873	ENSP00000326693.6
ENSG00000145217.13	ENSG00000145217	SLC26A1	154.53	-0.557068	0.138505	-4.022	5.77e-05	0.00163023	chr4	979073	993440	-	protein_coding	HAVANA|ENSEMBL	979409	991703	ENSP00000381532.2|ENSP00000483506.1|ENSP00000354721.2|ENSP00000381528.2
ENSG00000125520.13	ENSG00000125520	SLC2A4RG	427.654	-0.24774	0.0886553	-2.79441	0.00519941	0.0365934	chr20	63739861	63743505	+	protein_coding	HAVANA	63739913	63742987	ENSP00000266077.2
ENSG00000129353.14	ENSG00000129353	SLC44A2	752.469	-0.158246	0.0586338	-2.69888	0.0069573	0.0442959	chr19	10602457	10644559	+	protein_coding	HAVANA	10602531	10643382	ENSP00000468691.1|ENSP00000385135.3|ENSP00000336888.4|ENSP00000465547.1|ENSP00000467552.1|ENSP00000466664.1|ENSP00000466612.1|ENSP00000468070.1|ENSP00000466575.1|ENSP00000468812.1
ENSG00000117834.12	ENSG00000117834	SLC5A9	152.643	0.387688	0.108095	3.58653	0.000335102	0.00552226	chr1	48222685	48248644	+	protein_coding	HAVANA	48222737	48247540	ENSP00000404982.1|ENSP00000431900.1|ENSP00000401730.2|ENSP00000236495.5|ENSP00000399991.2|ENSP00000431196.1
ENSG00000227028.6	ENSG00000227028	SLC8A1-AS1	172.304	0.394262	0.13447	2.93197	0.00336816	0.027346	chr2	39786453	40255209	+	antisense	HAVANA	NA	NA
ENSG00000109062.9	ENSG00000109062	SLC9A3R1	375.352	-0.299464	0.105387	-2.84157	0.00448916	0.0331423	chr17	74748652	74769353	+	protein_coding	HAVANA	74748847	74768653	ENSP00000464321.1|ENSP00000262613.5|ENSP00000464982.1|ENSP00000464117.1
ENSG00000205045.8	ENSG00000205045	SLFN12L	92.9036	-0.908782	0.212165	-4.28337	1.84e-05	0.000717807	chr17	35464249	35537861	-	protein_coding	HAVANA|ENSEMBL	35474926	35522379	ENSP00000437635.1|ENSP00000354412.4|ENSP00000487397.1
ENSG00000184564.8	ENSG00000184564	SLITRK6	71.2301	0.625431	0.209836	2.98057	0.0028771	0.0245566	chr13	85792790	85799488	-	protein_coding	HAVANA	85793986	85796508	ENSP00000383143.2
ENSG00000099956.18	ENSG00000099956	SMARCB1	380.492	-0.17651	0.0617184	-2.85993	0.00423734	0.0318783	chr22	23786963	23834516	+	protein_coding	HAVANA	23787170	23834177	ENSP00000388489.1|ENSP00000340883.6|ENSP00000263121.7|ENSP00000383984.3|ENSP00000385226.3|ENSP00000489445.1|ENSP00000489115.1
ENSG00000198952.8	ENSG00000198952	SMG5	1137.81	-0.34469	0.099003	-3.48161	0.000498407	0.00723847	chr1	156249224	156282825	-	protein_coding	HAVANA	156250590	156282680	ENSP00000355261.5
ENSG00000198732.10	ENSG00000198732	SMOC1	401.862	0.964156	0.241384	3.99429	6.49e-05	0.00176962	chr14	69854131	70032366	+	protein_coding	HAVANA	69879679	70030255	ENSP00000355110.3|ENSP00000370680.4
ENSG00000197157.10	ENSG00000197157	SND1	2313.07	-0.307832	0.102271	-3.00995	0.00261288	0.0229606	chr7	127652180	128092609	+	protein_coding	HAVANA	127652374	128092055	ENSP00000346762.3|ENSP00000419327.1
ENSG00000225746.8	ENSG00000225746	SNHG23	69.0537	0.745373	0.214102	3.48139	0.00049882	0.00723861	chr14	100937401	100960199	+	lincRNA	HAVANA	NA	NA
ENSG00000124562.9	ENSG00000124562	SNRPC	255.409	-0.286771	0.0714158	-4.01551	5.93e-05	0.00165999	chr6	34757406	34773794	+	protein_coding	HAVANA	34757544	34773567	ENSP00000244520.5|ENSP00000363130.1|ENSP00000363129.3
ENSG00000182004.12	ENSG00000182004	SNRPE	212.079	-0.308276	0.0968507	-3.183	0.00145755	0.0153934	chr1	203861603	203870550	+	protein_coding	HAVANA	203861660	203869929	ENSP00000400591.2|ENSP00000356176.1
ENSG00000134532.15	ENSG00000134532	SOX5	170.909	0.330072	0.118638	2.78219	0.00539942	0.037482	chr12	23529500	23951032	-	protein_coding	HAVANA|ENSEMBL	23534222	23950876	ENSP00000437487.1|ENSP00000370788.2|ENSP00000398273.2|ENSP00000439832.1|ENSP00000441973.1|ENSP00000379328.2|ENSP00000443520.1|ENSP00000356174.3|ENSP00000442119.1|ENSP00000393240.2|ENSP00000441579.1
ENSG00000171056.7	ENSG00000171056	SOX7	23.2163	0.372983	0.137808	2.70654	0.00679892	0.0436036	chr8	10723768	10730512	-	protein_coding	HAVANA	10725741	10730433	ENSP00000301921.1
ENSG00000182957.15	ENSG00000182957	SPATA13	695.517	-0.348146	0.0983597	-3.53952	0.000400849	0.00626437	chr13	23979805	24307074	+	protein_coding	HAVANA|ENSEMBL	24222930	24302770	ENSP00000398560.2|ENSP00000371542.3|ENSP00000371527.4|ENSP00000401605.1|ENSP00000477296.1|ENSP00000343631.6|ENSP00000382830.2|ENSP00000386471.1|ENSP00000397498.1|ENSP00000477304.1
ENSG00000114902.13	ENSG00000114902	SPCS1	315.653	-0.340981	0.0979142	-3.48245	0.000496849	0.00722896	chr3	52704955	52711146	+	protein_coding	HAVANA|ENSEMBL	52706046	52707809	ENSP00000391610.1|ENSP00000478310.1|ENSP00000233025.7|ENSP00000473265.1
ENSG00000118363.11	ENSG00000118363	SPCS2	492.548	-0.282039	0.0881385	-3.19995	0.00137453	0.0148155	chr11	74949247	74979031	+	protein_coding	HAVANA|ENSEMBL	74949286	74977040	ENSP00000263672.6|ENSP00000478550.1|ENSP00000433439.1|ENSP00000434248.1|ENSP00000436759.1|ENSP00000434706.1
ENSG00000196104.10	ENSG00000196104	SPOCK3	416.44	1.01822	0.227932	4.46718	7.93e-06	0.000404862	chr4	166733384	167234796	-	protein_coding	HAVANA|ENSEMBL	166734924	167234173	ENSP00000444789.1|ENSP00000349677.3|ENSP00000411344.2|ENSP00000350153.4|ENSP00000425570.1|ENSP00000423421.1|ENSP00000420920.1|ENSP00000441396.2|ENSP00000426716.1|ENSP00000423606.1|ENSP00000425712.1|ENSP00000426318.1|ENSP00000425502.1|ENSP00000424677.1|ENSP00000424980.1|ENSP00000422170.1|ENSP00000426177.1|ENSP00000423176.1|ENSP00000425859.1|ENSP00000424674.1|ENSP00000420928.1|ENSP00000422336.1|ENS…
ENSG00000159674.11	ENSG00000159674	SPON2	7878.19	-1.27896	0.290757	-4.39871	1.09e-05	0.000502378	chr4	1166932	1208962	-	protein_coding	HAVANA|ENSEMBL	1167475	1172071	ENSP00000290902.5|ENSP00000394832.1|ENSP00000483599.1|ENSP00000424542.1|ENSP00000425871.1|ENSP00000422516.1|ENSP00000421634.1|ENSP00000421379.1|ENSP00000423414.1|ENSP00000421858.1
ENSG00000136158.10	ENSG00000136158	SPRY2	171.289	0.465397	0.102442	4.54302	5.55e-06	0.000314392	chr13	80335976	80340951	-	protein_coding	HAVANA|ENSEMBL	80336646	80337705	ENSP00000366306.1|ENSP00000366308.3|ENSP00000439027.2
ENSG00000277893.1	ENSG00000277893	SRD5A2	232.175	0.965689	0.256914	3.7588	0.000170732	0.00341688	chr2	31522480	31581067	-	protein_coding	HAVANA	31526199	31580900	ENSP00000477587.1
ENSG00000116649.9	ENSG00000116649	SRM	197.848	-0.256377	0.0956061	-2.6816	0.00732718	0.0457788	chr1	11054584	11060024	-	protein_coding	HAVANA	11054868	11059943	ENSP00000366156.2|ENSP00000465966.1|ENSP00000467669.1|ENSP00000465687.1|ENSP00000468760.1
ENSG00000144867.11	ENSG00000144867	SRPRB	340.872	-0.274111	0.102764	-2.66739	0.00764435	0.0470681	chr3	133784033	133825772	+	protein_coding	HAVANA	133805849	133819763	ENSP00000418401.1|ENSP00000417096.1|ENSP00000417316.1
ENSG00000163479.13	ENSG00000163479	SSR2	645.694	-0.248095	0.0641174	-3.86938	0.000109112	0.00251263	chr1	156009048	156020959	-	protein_coding	HAVANA	156009543	156020896	ENSP00000295702.4|ENSP00000434870.1|ENSP00000436201.1|ENSP00000432831.1|ENSP00000434306.1|ENSP00000431366.1|ENSP00000436228.1|ENSP00000437239.1|ENSP00000435692.1|ENSP00000434532.2
ENSG00000180879.13	ENSG00000180879	SSR4	466.78	-0.408519	0.109753	-3.72216	0.000197528	0.00380032	chrX	153793516	153798505	+	protein_coding	HAVANA	153794688	153798430	ENSP00000317331.3|ENSP00000359104.1|ENSP00000359103.3|ENSP00000359102.3
ENSG00000180616.8	ENSG00000180616	SSTR2	64.2869	0.544415	0.130783	4.16273	3.14e-05	0.00105353	chr17	73165012	73176633	+	protein_coding	HAVANA	73169320	73170426	ENSP00000350198.2
ENSG00000117155.16	ENSG00000117155	SSX2IP	373.919	0.396869	0.0990815	4.00548	6.19e-05	0.00171212	chr1	84643707	84690803	-	protein_coding	HAVANA|ENSEMBL	84647436	84671219	ENSP00000412781.2|ENSP00000340279.3|ENSP00000432261.1|ENSP00000474925.1|ENSP00000474480.1|ENSP00000473763.1|ENSP00000416067.1
ENSG00000166444.17	ENSG00000166444	ST5	850.405	0.442867	0.106556	4.1562	3.24e-05	0.00107349	chr11	8693351	8910951	-	protein_coding	HAVANA|ENSEMBL	8694099	8776226	ENSP00000435097.1|ENSP00000433528.1|ENSP00000319678.6|ENSP00000432887.1|ENSP00000350294.1|ENSP00000436808.1|ENSP00000433349.1|ENSP00000436802.1|ENSP00000433043.1|ENSP00000433588.1|ENSP00000435016.1|ENSP00000433793.1|ENSP00000437096.1|ENSP00000486899.1|ENSP00000431580.1|ENSP00000433858.1|ENSP00000437006.1|ENSP00000431564.1|ENSP00000434701.1|ENSP00000432521.1|ENSP00000436506.1|ENSP00000435292.1|ENS…
ENSG00000144681.10	ENSG00000144681	STAC	75.8909	0.643212	0.209049	3.07685	0.00209198	0.019751	chr3	36380344	36548007	+	protein_coding	HAVANA	36380644	36546286	ENSP00000273183.3|ENSP00000393713.2|ENSP00000397521.1|ENSP00000398403.1
ENSG00000157214.13	ENSG00000157214	STEAP2	8882.87	-0.537638	0.180832	-2.97313	0.00294778	0.024953	chr7	90167590	90238137	+	protein_coding	HAVANA|ENSEMBL	90225083	90238122	ENSP00000401783.1|ENSP00000287908.3|ENSP00000378119.2|ENSP00000378123.1|ENSP00000378120.2|ENSP00000378128.1|ENSP00000415931.1|ENSP00000384191.1|ENSP00000378125.2
ENSG00000130413.15	ENSG00000130413	STK33	139.944	0.351196	0.12913	2.71971	0.0065339	0.0425184	chr11	8391868	8594289	-	protein_coding	HAVANA	8392513	8474905	ENSP00000416750.1|ENSP00000320754.1|ENSP00000379905.1|ENSP00000351743.3|ENSP00000415688.2|ENSP00000436418.1|ENSP00000436905.1|ENSP00000391362.1|ENSP00000411510.2|ENSP00000403599.2|ENSP00000397569.2|ENSP00000397874.2|ENSP00000432822.1
ENSG00000173320.9	ENSG00000173320	STOX2	205.557	0.472482	0.138683	3.40693	0.000656981	0.00878799	chr4	183853431	184023526	+	protein_coding	HAVANA	183906791	184017281	ENSP00000311257.4|ENSP00000425388.1|ENSP00000422118.1|ENSP00000426209.1
ENSG00000266173.5	ENSG00000266173	STRADA	197.92	-0.279974	0.0980462	-2.85553	0.00429653	0.032176	chr17	63702832	63741970	-	protein_coding	HAVANA|ENSEMBL	63703602	63728369	ENSP00000245865.5|ENSP00000365000.4|ENSP00000376677.4|ENSP00000336655.6|ENSP00000464213.1|ENSP00000398841.3|ENSP00000462922.1|ENSP00000462530.1|ENSP00000464547.1|ENSP00000463872.1|ENSP00000481505.1|ENSP00000464085.1|ENSP00000463203.1|ENSP00000462384.1|ENSP00000464139.1|ENSP00000462496.1|ENSP00000463238.1
ENSG00000148248.13	ENSG00000148248	SURF4	1119.76	-0.214244	0.079679	-2.68884	0.00717003	0.045188	chr9	133361449	133376166	-	protein_coding	HAVANA|ENSEMBL	133363467	133375969	ENSP00000361057.3|ENSP00000446061.1|ENSP00000481666.1|ENSP00000483216.1|ENSP00000419853.2|ENSP00000361059.3
ENSG00000131018.22	ENSG00000131018	SYNE1	4091.21	0.341087	0.126783	2.69031	0.00713848	0.0450878	chr6	152121684	152637801	-	protein_coding	HAVANA|ENSEMBL	152122439	152628331	ENSP00000356224.5|ENSP00000341887.6|ENSP00000441052.1|ENSP00000356226.4|ENSP00000396024.1|ENSP00000356220.3|ENSP00000346701.4|ENSP00000437411.1|ENSP00000443879.1|ENSP00000390975.2|ENSP00000390858.3|ENSP00000442805.1|ENSP00000356222.4|ENSP00000356217.3|ENSP00000414510.2|ENSP00000438508.1|ENSP00000440193.1|ENSP00000446021.1|ENSP00000441264.1|ENSP00000481873.1
ENSG00000108639.7	ENSG00000108639	SYNGR2	1029.57	-0.381206	0.115776	-3.29263	0.00099256	0.0118298	chr17	78168558	78173527	+	protein_coding	HAVANA	78168617	78171997	ENSP00000225777.2|ENSP00000465678.1|ENSP00000466942.1|ENSP00000466032.1|ENSP00000467600.1|ENSP00000466204.1|ENSP00000465005.1
ENSG00000162298.16	ENSG00000162298	SYVN1	605.273	-0.205175	0.0584943	-3.50761	0.000452151	0.00678824	chr11	65121780	65134533	-	protein_coding	HAVANA	65128385	65133601	ENSP00000294256.8|ENSP00000366395.3|ENSP00000302035.6|ENSP00000436984.1|ENSP00000431215.1|ENSP00000432166.1|ENSP00000432888.1|ENSP00000431720.1
ENSG00000164691.16	ENSG00000164691	TAGAP	114.264	-0.936038	0.198378	-4.71845	2.38e-06	0.000173399	chr6	159034468	159045152	-	protein_coding	HAVANA	159035830	159044146	ENSP00000356033.3|ENSP00000322650.6|ENSP00000340217.5
ENSG00000177156.10	ENSG00000177156	TALDO1	547.893	-0.31735	0.0911903	-3.48008	0.000501261	0.00726241	chr11	747329	765024	+	protein_coding	HAVANA	747482	764842	ENSP00000321259.3|ENSP00000435042.1|ENSP00000437098.1|ENSP00000433501.1
ENSG00000136560.13	ENSG00000136560	TANK	364.839	-0.275781	0.0783474	-3.51998	0.000431584	0.00657758	chr2	161136908	161236221	+	protein_coding	HAVANA	161160794	161235515	ENSP00000259075.2|ENSP00000398157.1|ENSP00000376505.2|ENSP00000399934.1|ENSP00000411041.1|ENSP00000384492.1|ENSP00000384235.1|ENSP00000388930.1|ENSP00000410259.1|ENSP00000412622.1|ENSP00000385487.1|ENSP00000392776.1|ENSP00000385983.1|ENSP00000412556.1|ENSP00000387439.1
ENSG00000135090.13	ENSG00000135090	TAOK3	1560.7	0.299369	0.0983545	3.04377	0.00233631	0.0212732	chr12	118149801	118372945	-	protein_coding	HAVANA	118151000	118255567	ENSP00000416374.2|ENSP00000376317.3|ENSP00000441932.1|ENSP00000443834.1|ENSP00000443487.1|ENSP00000439620.1|ENSP00000437389.1|ENSP00000443465.1|ENSP00000438820.1|ENSP00000444057.1|ENSP00000440315.1|ENSP00000441071.1|ENSP00000442541.1|ENSP00000438766.1
ENSG00000227954.6	ENSG00000227954	TARID	64.8798	0.590461	0.171979	3.43333	0.000596223	0.00822108	chr6	133502252	133892802	-	antisense	HAVANA	NA	NA
ENSG00000106638.15	ENSG00000106638	TBL2	340.7	-0.216446	0.0788783	-2.74405	0.00606864	0.0404902	chr7	73568932	73578791	-	protein_coding	HAVANA|ENSEMBL	73570481	73578549	ENSP00000307260.4|ENSP00000398195.1|ENSP00000409820.1|ENSP00000484750.1|ENSP00000407503.1|ENSP00000413979.1|ENSP00000404242.1|ENSP00000410737.1|ENSP00000400569.1|ENSP00000408255.1|ENSP00000414865.1|ENSP00000480898.1|ENSP00000406418.1
ENSG00000071564.14	ENSG00000071564	TCF3	450.323	-0.304621	0.0799198	-3.81159	0.000138077	0.00297002	chr19	1609290	1652605	-	protein_coding	HAVANA|ENSEMBL	1611710	1650248	ENSP00000262965.4|ENSP00000344375.6|ENSP00000465251.1|ENSP00000465549.1|ENSP00000468481.1|ENSP00000480564.1|ENSP00000396363.3|ENSP00000467508.2|ENSP00000465510.2|ENSP00000466565.2|ENSP00000466952.2|ENSP00000468487.1|ENSP00000378813.3|ENSP00000465481.1|ENSP00000467972.1|ENSP00000467388.2|ENSP00000466052.2|ENSP00000466954.1
ENSG00000145022.4	ENSG00000145022	TCTA	275.14	-0.293866	0.0967023	-3.03887	0.00237469	0.0215362	chr3	49412206	49416475	+	protein_coding	HAVANA	49412427	49414859	ENSP00000273590.3
ENSG00000187079.14	ENSG00000187079	TEAD1	972.947	0.358425	0.115772	3.09595	0.00196183	0.0189298	chr11	12674591	12944483	+	protein_coding	HAVANA|ENSEMBL	12674617	12937219	ENSP00000435233.1|ENSP00000432587.2|ENSP00000435977.1|ENSP00000334754.6|ENSP00000354588.3|ENSP00000435393.1
ENSG00000218336.7	ENSG00000218336	TENM3	286.275	0.416179	0.129663	3.20971	0.00132871	0.0145015	chr4	182143987	182803024	+	protein_coding	HAVANA|ENSEMBL	182324021	182800348	ENSP00000421320.1|ENSP00000424226.1|ENSP00000426914.1|ENSP00000385276.3
ENSG00000092969.11	ENSG00000092969	TGFB2	305.628	0.473179	0.166214	2.84681	0.00441603	0.0327827	chr1	218346235	218444619	+	protein_coding	HAVANA	218346702	218441359	ENSP00000355897.4|ENSP00000355896.4
ENSG00000232480.1	ENSG00000232480	TGFB2-AS1	94.658	0.461678	0.154151	2.99497	0.00274473	0.0237286	chr1	218344196	218345678	-	antisense	HAVANA	NA	NA
ENSG00000130193.7	ENSG00000130193	THEM6	126.472	-0.493954	0.122028	-4.04788	5.17e-05	0.00150689	chr8	142727203	142736927	+	protein_coding	HAVANA	142727347	142735436	ENSP00000338607.3|ENSP00000427970.1
ENSG00000151500.14	ENSG00000151500	THYN1	241.974	0.254713	0.091465	2.78482	0.00535582	0.0372903	chr11	134248279	134253370	-	protein_coding	HAVANA	134248441	134252882	ENSP00000376374.2|ENSP00000341657.3|ENSP00000376373.3|ENSP00000341452.5
ENSG00000099800.7	ENSG00000099800	TIMM13	242.868	-0.309224	0.0984473	-3.14101	0.00168364	0.0170049	chr19	2425624	2427894	-	protein_coding	HAVANA	2426951	2427533	ENSP00000215570.2|ENSP00000464881.1
ENSG00000149476.14	ENSG00000149476	TKFC	249.629	-0.219563	0.0721917	-3.04139	0.00235491	0.021403	chr11	61333210	61353295	+	protein_coding	HAVANA|ENSEMBL	61334729	61352988	ENSP00000378360.3|ENSP00000431844.2|ENSP00000434405.1|ENSP00000478735.1|ENSP00000432539.1|ENSP00000459382.1
ENSG00000174125.7	ENSG00000174125	TLR1	92.467	-0.473078	0.157143	-3.01049	0.0026083	0.0229477	chr4	38790677	38856817	-	protein_coding	HAVANA|ENSEMBL	38796474	38798831	ENSP00000354932.2|ENSP00000421259.1|ENSP00000421856.1|ENSP00000423017.1|ENSP00000423725.1|ENSP00000424894.1
ENSG00000164342.12	ENSG00000164342	TLR3	107.43	0.368994	0.130685	2.82353	0.00474975	0.0343616	chr4	186069152	186088069	+	protein_coding	HAVANA	186076620	186084870	ENSP00000296795.2|ENSP00000423386.1|ENSP00000423684.1
ENSG00000166557.12	ENSG00000166557	TMED3	757.544	-0.444511	0.121099	-3.67065	0.000241931	0.00438746	chr15	79311062	79427432	+	protein_coding	HAVANA	79311250	79411501	ENSP00000299705.5|ENSP00000414983.2|ENSP00000446062.1|ENSP00000440228.1
ENSG00000184840.11	ENSG00000184840	TMED9	803.949	-0.380721	0.0958634	-3.97149	7.14e-05	0.00190408	chr5	177592158	177596124	+	protein_coding	HAVANA	177592215	177595413	ENSP00000330945.6
ENSG00000188735.12	ENSG00000188735	TMEM120B	287.901	-0.139289	0.0505861	-2.75351	0.00589602	0.0396611	chr12	121712752	121783001	+	protein_coding	HAVANA	121712896	121775868	ENSP00000345152.6|ENSP00000404991.2|ENSP00000442105.1|ENSP00000446159.1
ENSG00000168936.10	ENSG00000168936	TMEM129	232.329	-0.233653	0.0640167	-3.64987	0.000262368	0.0046536	chr4	1715952	1721358	-	protein_coding	HAVANA|ENSEMBL	1717183	1720837	ENSP00000305243.2|ENSP00000372394.3|ENSP00000441812.1|ENSP00000417412.1|ENSP00000417259.1
ENSG00000172663.8	ENSG00000172663	TMEM134	278.219	-0.298122	0.0778305	-3.8304	0.000127936	0.0028106	chr11	67461710	67469272	-	protein_coding	HAVANA	67464617	67469192	ENSP00000312615.2|ENSP00000438439.1|ENSP00000481549.1|ENSP00000377455.3|ENSP00000483083.1|ENSP00000440630.1|ENSP00000441975.1
ENSG00000221962.4	ENSG00000221962	TMEM14EP	60.8313	-0.444573	0.15414	-2.88422	0.00392387	0.0302971	chr3	152340527	152340904	-	protein_coding	HAVANA	152340530	152340904	ENSP00000386163.3
ENSG00000249992.1	ENSG00000249992	TMEM158	62.1138	0.585219	0.202813	2.88551	0.00390781	0.0302356	chr3	45224466	45226278	-	protein_coding	HAVANA	45225128	45226027	ENSP00000422431.1
ENSG00000127419.16	ENSG00000127419	TMEM175	227.863	-0.346111	0.0707957	-4.88888	1.01e-06	9.34e-05	chr4	932387	958656	+	protein_coding	HAVANA|ENSEMBL	947740	958493	ENSP00000424746.1|ENSP00000264771.4|ENSP00000427218.1|ENSP00000425181.1|ENSP00000425867.1|ENSP00000423751.1|ENSP00000421750.1|ENSP00000427626.1|ENSP00000427039.1|ENSP00000423669.1|ENSP00000424208.1|ENSP00000425763.1|ENSP00000485461.1
ENSG00000163444.11	ENSG00000163444	TMEM183A	324.378	-0.23389	0.0814441	-2.87178	0.00408165	0.0310941	chr1	203007386	203024848	+	protein_coding	HAVANA	203007466	203023037	ENSP00000356211.3
ENSG00000139291.13	ENSG00000139291	TMEM19	161.972	-0.291295	0.0690326	-4.21968	2.45e-05	0.000875944	chr12	71686087	71705046	+	protein_coding	HAVANA	71686681	71704048	ENSP00000266673.5|ENSP00000448587.1|ENSP00000449955.1|ENSP00000448528.1|ENSP00000450089.1|ENSP00000448069.1
ENSG00000155755.18	ENSG00000155755	TMEM237	181.387	0.432525	0.0691161	6.25795	3.9e-10	3.19e-07	chr2	201620184	201643570	-	protein_coding	HAVANA|ENSEMBL	201624258	201643400	ENSP00000387203.2|ENSP00000386264.2|ENSP00000480508.1|ENSP00000286196.5|ENSP00000413230.2|ENSP00000402681.2
ENSG00000181778.4	ENSG00000181778	TMEM252	24.3119	0.681487	0.181297	3.75896	0.000170623	0.00341624	chr9	68536580	68540867	-	protein_coding	HAVANA	68537262	68540814	ENSP00000366528.3
ENSG00000034510.5	ENSG00000034510	TMSB10	1397.41	-0.343539	0.12741	-2.69633	0.00701075	0.0445288	chr2	84905625	84906675	+	protein_coding	HAVANA	84906018	84906420	ENSP00000233143.4
ENSG00000187653.11	ENSG00000187653	TMSB4XP8	26.0362	-0.458581	0.160149	-2.86347	0.00419033	0.031637	chr4	90838903	90839037	-	processed_pseudogene	HAVANA	NA	NA
ENSG00000173530.5	ENSG00000173530	TNFRSF10D	91.4578	0.393104	0.121677	3.23071	0.00123485	0.013762	chr8	23135588	23164030	-	protein_coding	HAVANA	23137873	23163935	ENSP00000310263.3
ENSG00000215788.9	ENSG00000215788	TNFRSF25	129.76	-0.563178	0.148306	-3.7974	0.000146222	0.00307505	chr1	6461151	6466195	-	protein_coding	HAVANA	6461437	6466107	ENSP00000431554.1|ENSP00000434129.1|ENSP00000367013.3|ENSP00000349341.3|ENSP00000337713.5|ENSP00000404274.2|ENSP00000326762.3|ENSP00000314451.3|ENSP00000423121.1|ENSP00000421976.1|ENSP00000424071.1|ENSP00000465381.1
ENSG00000101470.9	ENSG00000101470	TNNC2	22.507	0.91499	0.23223	3.94002	8.15e-05	0.00206195	chr20	45823214	45833745	-	protein_coding	HAVANA	45823351	45827248	ENSP00000361636.3|ENSP00000361638.1
ENSG00000131746.12	ENSG00000131746	TNS4	239.815	1.00823	0.251391	4.01062	6.06e-05	0.00168159	chr17	40475828	40501597	-	protein_coding	HAVANA	40477591	40496425	ENSP00000254051.6|ENSP00000463456.1
ENSG00000183864.4	ENSG00000183864	TOB2	1029.95	0.350864	0.0808425	4.3401	1.42e-05	0.000606506	chr22	41433492	41447023	-	protein_coding	HAVANA	41436314	41437345	ENSP00000331305.3|ENSP00000388549.1
ENSG00000164938.13	ENSG00000164938	TP53INP1	1730.03	-0.54308	0.141768	-3.83077	0.000127744	0.00281023	chr8	94925972	94949411	-	protein_coding	HAVANA	94930482	94940941	ENSP00000390063.2|ENSP00000344215.4
ENSG00000073282.12	ENSG00000073282	TP63	230.045	1.12028	0.213633	5.24392	1.57e-07	2.6e-05	chr3	189631416	189897279	+	protein_coding	HAVANA	189631516	189894499	ENSP00000264731.3|ENSP00000407144.2|ENSP00000317510.5|ENSP00000376253.3|ENSP00000394337.2|ENSP00000346614.5|ENSP00000401661.1|ENSP00000392488.1|ENSP00000376256.2|ENSP00000376254.3|ENSP00000387839.1|ENSP00000389485.1
ENSG00000056558.10	ENSG00000056558	TRAF1	431.885	-0.534778	0.144663	-3.69672	0.000218402	0.00408171	chr9	120902393	120929173	-	protein_coding	HAVANA|ENSEMBL	120905023	120926075	ENSP00000438583.1|ENSP00000362994.3|ENSP00000443183.1
ENSG00000082512.14	ENSG00000082512	TRAF5	507.915	-0.408026	0.142649	-2.86035	0.00423176	0.0318552	chr1	211326615	211374946	+	protein_coding	HAVANA|ENSEMBL	211353240	211372699	ENSP00000336825.2|ENSP00000261464.5|ENSP00000355971.3
ENSG00000131653.12	ENSG00000131653	TRAF7	307.565	-0.18434	0.0650805	-2.83249	0.00461868	0.0337834	chr16	2155698	2178129	+	protein_coding	HAVANA	2163921	2176571	ENSP00000479297.1|ENSP00000318944.6|ENSP00000478515.1|ENSP00000457735.1|ENSP00000456034.1
ENSG00000154370.13	ENSG00000154370	TRIM11	333.895	-0.16337	0.0519754	-3.14322	0.00167098	0.0169186	chr1	228393673	228406840	-	protein_coding	HAVANA	228394708	228406561	ENSP00000473360.1|ENSP00000284551.6|ENSP00000473574.1|ENSP00000355660.3|ENSP00000473579.1
ENSG00000130726.11	ENSG00000130726	TRIM28	905.611	-0.227332	0.0606752	-3.74671	0.000179168	0.00353803	chr19	58544091	58550722	+	protein_coding	HAVANA	58544136	58550550	ENSP00000472586.1|ENSP00000473126.1|ENSP00000253024.4|ENSP00000342232.5|ENSP00000470503.1|ENSP00000471303.1
ENSG00000116525.13	ENSG00000116525	TRIM62	183.461	-0.18881	0.0616293	-3.06364	0.00218661	0.0203655	chr1	33145402	33182059	-	protein_coding	HAVANA	33147180	33181432	ENSP00000291416.5|ENSP00000441173.1
ENSG00000167333.12	ENSG00000167333	TRIM68	362.798	-0.377868	0.13669	-2.76442	0.00570247	0.0388067	chr11	4598672	4608259	-	protein_coding	HAVANA	4600279	4605504	ENSP00000300747.5|ENSP00000431783.1|ENSP00000434681.1|ENSP00000436112.1
ENSG00000067445.20	ENSG00000067445	TRO	113.941	0.605433	0.138202	4.38079	1.18e-05	0.00053551	chrX	54920462	54931431	+	protein_coding	HAVANA|ENSEMBL	54922247	54931335	ENSP00000388947.1|ENSP00000387676.1|ENSP00000405126.2|ENSP00000404645.1|ENSP00000411717.1|ENSP00000412588.1|ENSP00000173898.7|ENSP00000318278.8|ENSP00000483142.1|ENSP00000404794.1|ENSP00000364162.4|ENSP00000382641.1|ENSP00000405043.1|ENSP00000407996.1|ENSP00000406574.1|ENSP00000364181.2|ENSP00000392841.1|ENSP00000404767.1|ENSP00000405311.1
ENSG00000144935.14	ENSG00000144935	TRPC1	169.202	0.335253	0.126251	2.65544	0.00792049	0.0481096	chr3	142724074	142807888	+	protein_coding	HAVANA|ENSEMBL	142724560	142806232	ENSP00000419313.1|ENSP00000273482.6|ENSP00000481537.1|ENSP00000418708.1
ENSG00000133107.14	ENSG00000133107	TRPC4	162.924	0.902023	0.200133	4.50711	6.57e-06	0.000354079	chr13	37636636	37870425	-	protein_coding	HAVANA|ENSEMBL	37636906	37783333	ENSP00000369027.3|ENSP00000342580.5|ENSP00000486109.1|ENSP00000369001.1|ENSP00000435969.1|ENSP00000410133.2|ENSP00000348025.2|ENSP00000351264.2|ENSP00000368995.2
ENSG00000104447.11	ENSG00000104447	TRPS1	1250.74	0.426059	0.11213	3.79968	0.000144885	0.00305854	chr8	115408496	115809673	-	protein_coding	HAVANA	115414026	115667883	ENSP00000379065.3|ENSP00000220888.5|ENSP00000428910.1|ENSP00000428680.1|ENSP00000428121.1|ENSP00000429174.1|ENSP00000430803.2|ENSP00000379063.2|ENSP00000430383.1|ENSP00000405028.1|ENSP00000400360.1
ENSG00000149743.13	ENSG00000149743	TRPT1	121.462	-0.283207	0.074953	-3.77847	0.000157797	0.00323646	chr11	64223799	64226254	-	protein_coding	HAVANA|ENSEMBL	64223879	64225860	ENSP00000378051.3|ENSP00000438683.1|ENSP00000378050.2|ENSP00000439586.1|ENSP00000445292.1|ENSP00000314073.6|ENSP00000437741.1|ENSP00000442066.1
ENSG00000166925.8	ENSG00000166925	TSC22D4	516.389	-0.319978	0.074041	-4.32162	1.55e-05	0.000642318	chr7	100463359	100479279	-	protein_coding	HAVANA	100466962	100478038	ENSP00000300181.2|ENSP00000388168.1|ENSP00000377560.1|ENSP00000395795.1
ENSG00000145777.14	ENSG00000145777	TSLP	33.1481	0.848142	0.204679	4.14378	3.42e-05	0.0011109	chr5	111070062	111078024	+	protein_coding	HAVANA	111071484	111076071	ENSP00000399099.2|ENSP00000339804.3|ENSP00000427827.1
ENSG00000106537.7	ENSG00000106537	TSPAN13	552.855	-0.401	0.145831	-2.74976	0.0059639	0.0399841	chr7	16753535	16784536	+	protein_coding	HAVANA	16753968	16783488	ENSP00000262067.4
ENSG00000215845.10	ENSG00000215845	TSTD1	207.866	-0.286174	0.104522	-2.73795	0.00618243	0.0410453	chr1	161037631	161038990	-	protein_coding	HAVANA	161037778	161038889	ENSP00000325518.10|ENSP00000357002.3|ENSP00000357003.1|ENSP00000388293.2|ENSP00000473633.1
ENSG00000235954.6	ENSG00000235954	TTC28-AS1	191.686	0.173487	0.0577148	3.00594	0.00264761	0.0231648	chr22	27919376	28008581	+	processed_transcript	HAVANA|ENSEMBL	NA	NA
ENSG00000116830.11	ENSG00000116830	TTF2	280.646	-0.233953	0.0641302	-3.6481	0.000264187	0.00467463	chr1	117060303	117107453	+	protein_coding	HAVANA	117060347	117101521	ENSP00000358478.3|ENSP00000408111.1
ENSG00000178952.8	ENSG00000178952	TUFM	651.183	-0.202421	0.065693	-3.08132	0.00206088	0.0195726	chr16	28842411	28846408	-	protein_coding	HAVANA	28842978	28846269	ENSP00000322439.3|ENSP00000455007.1
ENSG00000233608.3	ENSG00000233608	TWIST2	68.5822	0.707393	0.175859	4.02249	5.76e-05	0.00162864	chr2	238848032	238910543	+	protein_coding	HAVANA|ENSEMBL	238848216	238848695	ENSP00000405176.2|ENSP00000482581.1
ENSG00000239264.8	ENSG00000239264	TXNDC5	107.487	-0.471088	0.123999	-3.79912	0.000145209	0.00306392	chr6	7881517	7910814	-	protein_coding	HAVANA	7883147	7910776	ENSP00000369081.4|ENSP00000420784.1
ENSG00000063244.12	ENSG00000063244	U2AF2	1022.31	-0.202676	0.0572632	-3.53937	0.000401078	0.00626573	chr19	55654146	55674715	+	protein_coding	HAVANA	55655105	55674065	ENSP00000388475.1|ENSP00000307863.3|ENSP00000470020.1|ENSP00000466167.2|ENSP00000466935.1
ENSG00000221983.7	ENSG00000221983	UBA52	1097.31	-0.198395	0.0661387	-2.99968	0.00270265	0.0234885	chr19	18571730	18577550	+	protein_coding	HAVANA	18573301	18575226	ENSP00000472264.1|ENSP00000396910.1|ENSP00000471062.1|ENSP00000388107.1|ENSP00000470419.1|ENSP00000472137.1|ENSP00000471622.1|ENSP00000472545.1|ENSP00000470507.1|ENSP00000473048.1|ENSP00000471464.1|ENSP00000472768.1|ENSP00000471991.1
ENSG00000198833.6	ENSG00000198833	UBE2J1	956.805	-0.300331	0.100413	-2.99096	0.00278102	0.0239721	chr6	89326625	89352848	-	protein_coding	HAVANA	89329682	89352569	ENSP00000451261.1
ENSG00000140474.12	ENSG00000140474	ULK3	325.723	-0.238078	0.0851457	-2.79613	0.00517194	0.0364571	chr15	74836116	74843346	-	protein_coding	HAVANA|ENSEMBL	74837231	74843105	ENSP00000400312.2|ENSP00000456051.1|ENSP00000454583.1|ENSP00000456296.1|ENSP00000455395.1|ENSP00000457853.1|ENSP00000457061.1|ENSP00000457983.1|ENSP00000457305.1|ENSP00000456510.1|ENSP00000455199.1|ENSP00000486917.1
ENSG00000198722.13	ENSG00000198722	UNC13B	2026.74	-0.654492	0.161563	-4.051	5.1e-05	0.00149285	chr9	35161992	35405338	+	protein_coding	HAVANA|ENSEMBL	35162284	35404030	ENSP00000479261.1|ENSP00000484432.1|ENSP00000380006.1|ENSP00000367756.3|ENSP00000489581.1|ENSP00000367757.5|ENSP00000489441.1
ENSG00000173660.11	ENSG00000173660	UQCRH	598.382	-0.232094	0.0863312	-2.68841	0.00717924	0.0452099	chr1	46303631	46316776	+	protein_coding	HAVANA	46303767	46316581	ENSP00000309565.5|ENSP00000484857.1|ENSP00000477826.1
ENSG00000164405.10	ENSG00000164405	UQCRQ	320.873	-0.343322	0.111736	-3.07262	0.00212186	0.0199296	chr5	132866560	132868031	+	protein_coding	HAVANA	132866882	132867579	ENSP00000367939.3|ENSP00000367936.1|ENSP00000367934.1
ENSG00000105698.15	ENSG00000105698	USF2	745.492	-0.178033	0.0533403	-3.33768	0.000844815	0.0105219	chr19	35268978	35279821	+	protein_coding	HAVANA	35269102	35279253	ENSP00000340633.4|ENSP00000222305.2|ENSP00000471099.1|ENSP00000368429.3|ENSP00000477020.1|ENSP00000471511.1|ENSP00000469585.1|ENSP00000471775.1|ENSP00000469364.2|ENSP00000470277.1|ENSP00000470081.1
ENSG00000204394.12	ENSG00000204394	VARS	462.6	-0.274376	0.0606847	-4.52134	6.14e-06	0.000339614	chr6	31777518	31795953	-	protein_coding	HAVANA	31777597	31795217	ENSP00000364815.3|ENSP00000415679.1|ENSP00000413925.1
ENSG00000160948.13	ENSG00000160948	VPS28	321.677	-0.202925	0.0626991	-3.23649	0.0012101	0.0135475	chr8	144423601	144428563	-	protein_coding	HAVANA|ENSEMBL	144423808	144426945	ENSP00000366565.2|ENSP00000292510.3|ENSP00000434556.1|ENSP00000434064.1|ENSP00000433228.1|ENSP00000436102.1|ENSP00000431243.1|ENSP00000434393.1|ENSP00000432395.1
ENSG00000167987.10	ENSG00000167987	VPS37C	452.82	-0.247067	0.0913179	-2.70557	0.0068187	0.0436722	chr11	61130256	61161617	-	protein_coding	HAVANA	61131823	61138829	ENSP00000301765.5|ENSP00000446013.1
ENSG00000165633.12	ENSG00000165633	VSTM4	396.714	0.669985	0.132064	5.07319	3.91e-07	4.85e-05	chr10	49014245	49115509	-	protein_coding	HAVANA	49019653	49115485	ENSP00000331062.3|ENSP00000298454.3
ENSG00000110002.15	ENSG00000110002	VWA5A	204.865	0.55359	0.11281	4.90729	9.23e-07	8.74e-05	chr11	124115362	124147721	+	protein_coding	HAVANA|ENSEMBL	124117464	124145942	ENSP00000407726.2|ENSP00000355070.5|ENSP00000404683.1|ENSP00000376504.1|ENSP00000376501.4
ENSG00000274523.4	ENSG00000274523	WBSCR16	400.067	-0.213633	0.0605489	-3.52826	0.000418296	0.00644604	chr7	75027122	75074228	-	protein_coding	HAVANA|ENSEMBL	75028035	75074097	ENSP00000477659.1|ENSP00000480364.1|ENSP00000480781.1|ENSP00000477558.1
ENSG00000103175.10	ENSG00000103175	WFDC1	335.922	0.611588	0.210036	2.91182	0.0035933	0.0286362	chr16	84294646	84329851	+	protein_coding	HAVANA	84294972	84326937	ENSP00000219454.5|ENSP00000456920.1|ENSP00000481580.1
ENSG00000157954.14	ENSG00000157954	WIPI2	630.453	-0.227414	0.0618501	-3.67686	0.00023612	0.00431733	chr7	5190188	5233826	+	protein_coding	HAVANA	5190420	5230944	ENSP00000288828.4|ENSP00000384945.3|ENSP00000385297.3|ENSP00000371821.2|ENSP00000429654.1
ENSG00000105989.8	ENSG00000105989	WNT2	54.0112	1.12588	0.233224	4.82746	1.38e-06	0.00011666	chr7	117276631	117323289	-	protein_coding	HAVANA	117278158	117322989	ENSP00000265441.3|ENSP00000389643.1|ENSP00000419466.1
ENSG00000176871.8	ENSG00000176871	WSB2	467.029	-0.316513	0.0908984	-3.48206	0.000497576	0.00723241	chr12	118032694	118062430	-	protein_coding	HAVANA|ENSEMBL	118034199	118062162	ENSP00000444431.1|ENSP00000319474.3|ENSP00000409131.2|ENSP00000438433.1|ENSP00000439450.1|ENSP00000445547.1|ENSP00000440386.1
ENSG00000076924.11	ENSG00000076924	XAB2	401.518	-0.150248	0.0548254	-2.74048	0.00613503	0.0408102	chr19	7619525	7629565	-	protein_coding	HAVANA	7619589	7629527	ENSP00000351137.3
ENSG00000200521.1	ENSG00000200521	Y_RNA	37.2924	0.456724	0.126634	3.60664	0.000310188	0.00522752	chr4	157768013	157768113	-	misc_RNA	ENSEMBL	NA	NA
ENSG00000207061.1	ENSG00000207061	Y_RNA	244.546	0.595164	0.164389	3.62047	0.000294072	0.00504908	chr7	156186122	156186223	-	misc_RNA	ENSEMBL	NA	NA
ENSG00000200855.1	ENSG00000200855	Y_RNA	39.1086	1.10547	0.175384	6.30315	2.92e-10	2.84e-07	chr11	108084913	108085014	+	misc_RNA	ENSEMBL	NA	NA
ENSG00000207481.1	ENSG00000207481	Y_RNA	46.8962	0.528972	0.154088	3.43292	0.000597115	0.00823082	chr4	41303237	41303337	-	misc_RNA	ENSEMBL	NA	NA
ENSG00000207293.1	ENSG00000207293	Y_RNA	47.5757	0.647657	0.178651	3.62526	0.000288668	0.00498044	chr5	57169108	57169209	-	misc_RNA	ENSEMBL	NA	NA
ENSG00000222072.1	ENSG00000222072	Y_RNA	42.4261	0.542602	0.171434	3.16507	0.00155045	0.0160252	chr10	100907174	100907280	-	misc_RNA	ENSEMBL	NA	NA
ENSG00000201624.1	ENSG00000201624	Y_RNA	24.5339	0.818791	0.196955	4.15726	3.22e-05	0.00107183	chr12	33982465	33982566	-	misc_RNA	ENSEMBL	NA	NA
ENSG00000199580.1	ENSG00000199580	Y_RNA	21.6487	0.562916	0.199572	2.82061	0.00479321	0.0345518	chr15	74983274	74983376	-	misc_RNA	ENSEMBL	NA	NA
ENSG00000280697.1	ENSG00000280697	Y_RNA	12.6238	0.56623	0.20513	2.76035	0.00577402	0.0390898	chr9	127833951	127834042	-	misc_RNA	ENSEMBL	NA	NA
ENSG00000201913.1	ENSG00000201913	Y_RNA	12.5851	0.672907	0.178106	3.77813	0.00015801	0.00323687	chr7	100330777	100330877	-	misc_RNA	ENSEMBL	NA	NA
ENSG00000200332.1	ENSG00000200332	Y_RNA	38.0284	0.375801	0.136729	2.7485	0.00598679	0.0400964	chr22	41648089	41648190	-	misc_RNA	ENSEMBL	NA	NA
ENSG00000251837.1	ENSG00000251837	Y_RNA	17.137	0.612569	0.170923	3.58389	0.00033851	0.00556299	chr1	93027410	93027506	-	misc_RNA	ENSEMBL	NA	NA
ENSG00000201724.1	ENSG00000201724	Y_RNA	29.9956	0.438441	0.135048	3.24655	0.00116811	0.0132174	chr15	99681786	99681877	-	misc_RNA	ENSEMBL	NA	NA
ENSG00000106636.7	ENSG00000106636	YKT6	469.835	-0.281465	0.0802174	-3.50878	0.000450161	0.00676984	chr7	44200968	44214294	+	protein_coding	HAVANA	44201136	44212279	ENSP00000420805.1|ENSP00000223369.2|ENSP00000412414.1
ENSG00000083223.17	ENSG00000083223	ZCCHC6	2672.09	-0.278141	0.105067	-2.64726	0.00811478	0.0488778	chr9	86287733	86354454	-	protein_coding	HAVANA	86288680	86353199	ENSP00000277141.6|ENSP00000365127.2|ENSP00000365124.1|ENSP00000365130.3|ENSP00000365115.1|ENSP00000365114.1
ENSG00000122515.14	ENSG00000122515	ZMIZ2	1057.68	-0.297083	0.0666706	-4.45598	8.35e-06	0.000417719	chr7	44748581	44769881	+	protein_coding	HAVANA|ENSEMBL	44756250	44767620	ENSP00000409648.1|ENSP00000415501.1|ENSP00000311778.4|ENSP00000406820.1|ENSP00000414723.1|ENSP00000396601.1|ENSP00000265346.7|ENSP00000483853.1
ENSG00000178187.7	ENSG00000178187	ZNF454	58.312	0.489072	0.1326	3.68834	0.000225724	0.00417763	chr5	178941191	178966433	+	protein_coding	HAVANA	178942792	178965970	ENSP00000326249.3|ENSP00000430354.1
ENSG00000173258.12	ENSG00000173258	ZNF483	482.678	0.429522	0.128905	3.33208	0.000862004	0.01067	chr9	111525159	111577844	+	protein_coding	HAVANA|ENSEMBL	111527396	111576411	ENSP00000350871.4|ENSP00000438048.1|ENSP00000363494.3|ENSP00000311679.5
ENSG00000198597.8	ENSG00000198597	ZNF536	73.4417	0.646517	0.201658	3.20601	0.00134588	0.0146226	chr19	30228290	30713538	+	protein_coding	HAVANA	30443563	30710998	ENSP00000465771.1|ENSP00000465268.1|ENSP00000347730.1|ENSP00000467909.2
ENSG00000144792.9	ENSG00000144792	ZNF660	142.691	0.328358	0.0804118	4.08346	4.44e-05	0.00134925	chr3	44578223	44599694	+	protein_coding	HAVANA	44594194	44595186	ENSP00000405284.1|ENSP00000411996.1|ENSP00000324605.2
ENSG00000143373.17	ENSG00000143373	ZNF687	332.583	-0.144374	0.0499359	-2.89118	0.00383793	0.0299152	chr1	151281618	151292180	+	protein_coding	HAVANA	151282070	151291206	ENSP00000395261.1|ENSP00000336620.5|ENSP00000415286.1|ENSP00000319829.5|ENSP00000398821.1|ENSP00000416942.1
ENSG00000269067.1	ENSG00000269067	ZNF728	21.5893	0.552345	0.176536	3.12879	0.00175529	0.0174854	chr19	22975468	23003176	-	protein_coding	HAVANA	22975471	23003030	ENSP00000471593.1|ENSP00000470208.1
ENSG00000170396.7	ENSG00000170396	ZNF804A	38.9512	0.503531	0.162437	3.09984	0.00193624	0.0187482	chr2	184598366	184939492	+	protein_coding	HAVANA|ENSEMBL	184598960	184939023	ENSP00000303252.6|ENSP00000483032.1
ENSG00000197779.13	ENSG00000197779	ZNF81	204.366	-0.195527	0.0622884	-3.13906	0.00169488	0.0170799	chrX	47836902	48002561	+	protein_coding	HAVANA|ENSEMBL	47846268	48002561	ENSP00000366153.1|ENSP00000341151.7|ENSP00000334641.4|ENSP00000366149.4
ENSG00000106400.11	ENSG00000106400	ZNHIT1	306.008	-0.375819	0.0595542	-6.31053	2.78e-10	2.84e-07	chr7	101217668	101224190	+	protein_coding	HAVANA	101218196	101223955	ENSP00000304593.2
