# Supplementary material for: Integrated Genomic Analysis of Primary Prostate Tumor Foci and Corresponding Lymph Node Metastases Identifies Mutations and Pathways Associated with Metastasis
Source: Preprints.org preprint supplement (doi:10.20944/preprints202310.1586.v1), 2023-10-25
Supplement: Supplementary file 3 [file Table_S12_PTF.met.v.PTF.NonMet.NP.GSEA.xlsx]

## Sheet: Table_S12
Gene Set	Description	Size	Leading Edge Number	ES	NES	P Value	FDR
hsa03010	Ribosome	130	95	0.56957	2.8574	<2.2e-16	<2.2e-16
hsa03040	Spliceosome	133	83	0.52965	2.7017	<2.2e-16	<2.2e-16
hsa00190	Oxidative phosphorylation	130	69	0.51907	2.6272	<2.2e-16	<2.2e-16
hsa03030	DNA replication	36	20	0.6758	2.6095	<2.2e-16	<2.2e-16
hsa01200	Carbon metabolism	114	63	0.50687	2.4934	<2.2e-16	<2.2e-16
hsa03420	Nucleotide excision repair	47	25	0.59943	2.4737	<2.2e-16	<2.2e-16
hsa03430	Mismatch repair	23	15	0.70175	2.4472	<2.2e-16	<2.2e-16
hsa03050	Proteasome	45	34	0.58817	2.4307	<2.2e-16	<2.2e-16
hsa03013	RNA transport	168	86	0.45387	2.3895	<2.2e-16	<2.2e-16
hsa00020	Citrate cycle (TCA cycle)	30	22	0.62952	2.3883	<2.2e-16	<2.2e-16
hsa04060	Cytokine-cytokine receptor interaction	282	137	-0.41604	-2.616	<2.2e-16	<2.2e-16
HALLMARK_MYC_TARGETS_V1	MYC targets, variant 1	200	140	0.58856	3.1575	<2.2e-16	<2.2e-16
HALLMARK_E2F_TARGETS	cell cycle progression: E2F targets	200	121	0.57376	3.1183	<2.2e-16	<2.2e-16
HALLMARK_PROTEIN_SECRETION	protein secretion	95	67	0.62855	3.0251	<2.2e-16	<2.2e-16
HALLMARK_MITOTIC_SPINDLE	cell cycle progression: mitotic spindle assembly	200	116	0.51692	2.7989	<2.2e-16	<2.2e-16
HALLMARK_G2M_CHECKPOINT	cell cycle progression: G2/M checkpoint	200	108	0.52641	2.7934	<2.2e-16	<2.2e-16
HALLMARK_DNA_REPAIR	DNA repair	149	74	0.48924	2.5351	<2.2e-16	<2.2e-16
HALLMARK_UNFOLDED_PROTEIN_RESPONSE	unfolded protein response; ER stress	113	61	0.49134	2.4373	<2.2e-16	<2.2e-16
HALLMARK_MTORC1_SIGNALING	mTORC1 signaling	200	104	0.43955	2.3373	<2.2e-16	<2.2e-16
HALLMARK_ADIPOGENESIS	adipocyte development	198	92	0.42821	2.3012	<2.2e-16	<2.2e-16
HALLMARK_ANDROGEN_RESPONSE	androgen response	101	57	0.46199	2.2189	<2.2e-16	<2.2e-16
HALLMARK_ALLOGRAFT_REJECTION	allograft rejection	199	88	-0.39043	-2.3433	<2.2e-16	<2.2e-16
HALLMARK_TNFA_SIGNALING_VIA_NFKB	TNFA signaling via NF_B	200	59	-0.40584	-2.4484	<2.2e-16	<2.2e-16
HALLMARK_IL6_JAK_STAT3_SIGNALING	IL6 STAT3 signaling during acute phase response	83	31	-0.4843	-2.4652	<2.2e-16	<2.2e-16
HALLMARK_INFLAMMATORY_RESPONSE	inflammation	199	78	-0.44417	-2.6796	<2.2e-16	<2.2e-16
HALLMARK_IL2_STAT5_SIGNALING	IL2 STAT5 signaling	199	41	-0.26374	-1.5936	<2.2e-16	0.012706
HALLMARK_KRAS_SIGNALING_DN	KRAS signaling, downregulated genes	197	83	-0.25713	-1.5592	<2.2e-16	0.015966
HALLMARK_MYOGENESIS	muscle differentiation	197	32	-0.25426	-1.5275	<2.2e-16	0.018439
HALLMARK_COMPLEMENT	complement cascade	200	34	-0.23964	-1.4551	0.012295	0.028992
HALLMARK_HYPOXIA	response to hypoxia; HIF1A targets	199	35	-0.23856	-1.4319	0.0037879	0.031597
HALLMARK_KRAS_SIGNALING_UP	KRAS signaling, upregulated genes	198	33	-0.22889	-1.3877	0.011321	0.041546
WP2446	Retinoblastoma Gene in Cancer	87	40	0.6106	2.8718	<2.2e-16	<2.2e-16
WP531	DNA Mismatch Repair	22	15	0.72177	2.4842	<2.2e-16	<2.2e-16
WP4016	DNA IR-damage and cellular response via ATR	80	36	0.51052	2.3703	<2.2e-16	<2.2e-16
WP4290	Metabolic reprogramming in colon cancer	42	30	0.58566	2.3584	<2.2e-16	<2.2e-16
WP45	G1 to S cell cycle control	64	28	0.52643	2.3334	<2.2e-16	<2.2e-16
WP3959	DNA IR-Double Strand Breaks (DSBs) and cellular response via ATM	55	37	0.49152	2.1203	<2.2e-16	0.0001658
WP3878	ATM Signaling Network in Development and Disease	45	30	0.52047	2.183	<2.2e-16	0.00018948
WP179	Cell Cycle	120	57	0.44425	2.2076	<2.2e-16	0.00022106
WP4240	Regulation of sister chromatid separation at the metaphase-anaphase transition	15	13	0.63851	1.9809	<2.2e-16	0.0025054
WP4018	Pathways in clear cell renal cell carcinoma	85	35	0.41236	1.949	<2.2e-16	0.002918
WP3617	Photodynamic therapy-induced NF-kB survival signaling	35	11	-0.43809	-1.8187	0.002439	0.023492
WP530	Cytokines and Inflammatory Response	27	18	-0.49461	-1.8926	0.0047393	0.024492
R-HSA-1640170	Cell Cycle	625	357	0.51945	3.1289	<2.2e-16	<2.2e-16
R-HSA-199991	Membrane Trafficking	623	308	0.45066	2.7057	<2.2e-16	<2.2e-16
R-HSA-453279	Mitotic G1-G1/S phases	148	80	0.50927	2.6506	<2.2e-16	<2.2e-16
R-HSA-5653656	Vesicle-mediated transport	662	323	0.43595	2.6307	<2.2e-16	<2.2e-16
R-HSA-392499	Metabolism of proteins	1974	940	0.40562	2.5784	<2.2e-16	<2.2e-16
R-HSA-212436	Generic Transcription Pathway	1152	506	0.40722	2.5424	<2.2e-16	<2.2e-16
R-HSA-3700989	Transcriptional Regulation by TP53	364	160	0.42625	2.4522	<2.2e-16	<2.2e-16
R-HSA-5628897	TP53 Regulates Metabolic Genes	86	42	0.51797	2.4399	<2.2e-16	<2.2e-16

## Sheet: Table PTF.Met v PTF.NM and NP
Gene Set	Description	FDR	Metabolism	DNA Repair	Cell Cycle	Stress	Immunity	Androgen	Trafficking
hsa00190	Oxidative phosphorylation	<2.2e-16	x
hsa01200	Carbon metabolism	<2.2e-16	x
hsa00020	Citrate cycle (TCA cycle)	<2.2e-16	x
WP4290	Metabolic reprogramming in colon cancer	<2.2e-16	x
R-HSA-392499	Metabolism of proteins	<2.2e-16	x
R-HSA-5628897	TP53 Regulates Metabolic Genes	<2.2e-16	x
hsa03420	Nucleotide excision repair	<2.2e-16		x
hsa03430	Mismatch repair	<2.2e-16		x
HALLMARK_DNA_REPAIR	DNA repair	<2.2e-16		x
WP531	DNA Mismatch Repair	<2.2e-16		x
WP4016	DNA IR-damage and cellular response via ATR	<2.2e-16		x
WP3959	DNA IR-Double Strand Breaks (DSBs) and cellular response via ATM	0.0001658		x
WP3878	ATM Signaling Network in Development and Disease	0.00018948		x
hsa03030	DNA replication	<2.2e-16			x
HALLMARK_MYC_TARGETS_V1	MYC targets, variant 1	<2.2e-16			x
HALLMARK_E2F_TARGETS	cell cycle progression: E2F targets	<2.2e-16			x
HALLMARK_MITOTIC_SPINDLE	cell cycle progression: mitotic spindle assembly	<2.2e-16			x
HALLMARK_G2M_CHECKPOINT	cell cycle progression: G2/M checkpoint	<2.2e-16			x
HALLMARK_MTORC1_SIGNALING	mTORC1 signaling	<2.2e-16			x
WP2446	Retinoblastoma Gene in Cancer	<2.2e-16			x
WP45	G1 to S cell cycle control	<2.2e-16			x
R-HSA-1640170	Cell Cycle	<2.2e-16			x
R-HSA-453279	Mitotic G1-G1/S phases	<2.2e-16			x
WP179	Cell Cycle	0.00022106			x
WP4240	Regulation of sister chromatid separation at the metaphase-anaphase transition	0.0025054			x
HALLMARK_UNFOLDED_PROTEIN_RESPONSE	unfolded protein response; ER stress	<2.2e-16				x
WP3617	Photodynamic therapy-induced NF-kB survival signaling	0.023492				x
hsa04060	Cytokine-cytokine receptor interaction	<2.2e-16					x
HALLMARK_ALLOGRAFT_REJECTION	allograft rejection	<2.2e-16					x
HALLMARK_TNFA_SIGNALING_VIA_NFKB	TNFA signaling via NF_B	<2.2e-16					x
HALLMARK_IL6_JAK_STAT3_SIGNALING	IL6 STAT3 signaling during acute phase response	<2.2e-16					x
HALLMARK_INFLAMMATORY_RESPONSE	inflammation	<2.2e-16					x
HALLMARK_IL2_STAT5_SIGNALING	IL2 STAT5 signaling	0.012706					x
WP530	Cytokines and Inflammatory Response	0.024492					x
HALLMARK_ANDROGEN_RESPONSE	androgen response	<2.2e-16						x
HALLMARK_PROTEIN_SECRETION	protein secretion	<2.2e-16							x
R-HSA-199991	Membrane Trafficking	<2.2e-16							x
R-HSA-5653656	Vesicle-mediated transport	<2.2e-16							x
HALLMARK_ADIPOGENESIS	adipocyte development	<2.2e-16
R-HSA-212436	Generic Transcription Pathway	<2.2e-16
R-HSA-3700989	Transcriptional Regulation by TP53	<2.2e-16
WP4018	Pathways in clear cell renal cell carcinoma	0.002918
