# Supplementary material for: Integrated Genomic Analysis of Primary Prostate Tumor Foci and Corresponding Lymph Node Metastases Identifies Mutations and Pathways Associated with Metastasis
Source: Preprints.org preprint supplement (doi:10.20944/preprints202310.1586.v1), 2023-10-25
Supplement: Supplementary file 4 [file Table_S13_combined_study_clinical_data.xlsx]

## Sheet: Table_S13_combined_study_clinic
Study ID	Patient ID	Sample ID	studyID:sampleId	StudyID:PatientID	Repeat patient	Archer Panel	Cancer Type	Cancer Type Detailed	Fraction Genome Altered	Gene Panel	Institute Source	Metastatic Site	MSI Comment	MSI Score	MSI Type	Mutation Count	Oncotree Code	Primary Tumor Site	Sample Class	Number of Samples Per Patient	Sample coverage	Sample Type	Sex	Somatic Status	TMB (nonsynonymous)	Tumor Purity	Age at Sample Collection	Androgen Deprivation Therapy (ADT)	Biopsy Gleason Grade	Timing of metastases	Disease Extent	Disease volume	Castration Resistance Event	MSK Slide ID	Overall Survival since Sample Collection (Months)	12-245 Part A Consented	12-245 Part C Consented	MSK Pathology Slide Available	Pediatric Case Indicator	Prostate-specific antigen	Race Category	Time from sample to castration resistance [months]	SO comments	Survival Status	Tissue Site	Diagnosis Age	ETS RAF-SPINK1 Status	Radical Prostatectomy Gleason Score for Prostate Cancer	Matched GE ACGH
prad_cdk12_mskcc_2020	P-0000197	P-0000197-T01-IM3	prad_cdk12_mskcc_2020:P-0000197-T01-IM3	prad_cdk12_mskcc_2020:P-0000197	0	NO	Prostate Cancer	Prostate Adenocarcinoma	0.0604	IMPACT341	MSKCC	Liver	NA	0.09	Stable	3	PRAD	Prostate	Tumor	1	1188	Metastasis	Male	Matched	3.32747	30	NA	NA	NA	NA	NA	NA	NA	NA	NA	NA	NA	NA	NA	NA	NA	NA	NA	NA	NA	NA	NA	NA	NA
prad_cdk12_mskcc_2020	P-0000318	P-0000318-T01-IM3	prad_cdk12_mskcc_2020:P-0000318-T01-IM3	prad_cdk12_mskcc_2020:P-0000318	0	NO	Prostate Cancer	Prostate Adenocarcinoma	0.5589	IMPACT341	MSKCC	Liver	NA	1.67	Stable	3	PRAD	Prostate	Tumor	1	782	Metastasis	Male	Matched	3.32747	60	NA	NA	NA	NA	NA	NA	NA	NA	NA	NA	NA	NA	NA	NA	NA	NA	NA	NA	NA	NA	NA	NA	NA
prad_cdk12_mskcc_2020	P-0000373	P-0000373-T01-IM3	prad_cdk12_mskcc_2020:P-0000373-T01-IM3	prad_cdk12_mskcc_2020:P-0000373	0	NO	Prostate Cancer	Prostate Adenocarcinoma	0.0023	IMPACT341	MSKCC	Lymph Node	MICROSATELLITE STABLE (MSS). See MSI note below.	0.09	Stable	1	PRAD	Prostate	Tumor	1	708	Metastasis	Male	Matched	1.10916	60	NA	NA	NA	NA	NA	NA	NA	NA	NA	NA	NA	NA	NA	NA	NA	NA	NA	NA	NA	NA	NA	NA	NA
prad_cdk12_mskcc_2020	P-0000401	P-0000401-T01-IM3	prad_cdk12_mskcc_2020:P-0000401-T01-IM3	prad_cdk12_mskcc_2020:P-0000401	0	NO	Prostate Cancer	Prostate Adenocarcinoma	0.2426	IMPACT341	MSKCC	Lymph Node	MICROSATELLITE STABLE (MSS). See MSI note below.	0.27	Stable	NA	PRAD	Prostate	Tumor	1	552	Metastasis	Male	Matched	0	60	NA	NA	NA	NA	NA	NA	NA	NA	NA	NA	NA	NA	NA	NA	NA	NA	NA	NA	NA	NA	NA	NA	NA
prad_cdk12_mskcc_2020	P-0000431	P-0000431-T01-IM3	prad_cdk12_mskcc_2020:P-0000431-T01-IM3	prad_cdk12_mskcc_2020:P-0000431	0	NO	Prostate Cancer	Prostate Adenocarcinoma	0.1985	IMPACT341	MSKCC	Lymph Node	NA	0.34	Stable	1	PRAD	Prostate	Tumor	1	530	Metastasis	Male	Matched	1.10916	60	NA	NA	NA	NA	NA	NA	NA	NA	NA	NA	NA	NA	NA	NA	NA	NA	NA	NA	NA	NA	NA	NA	NA
prad_cdk12_mskcc_2020	P-0000441	P-0000441-T01-IM3	prad_cdk12_mskcc_2020:P-0000441-T01-IM3	prad_cdk12_mskcc_2020:P-0000441	0	NO	Prostate Cancer	Prostate Adenocarcinoma	0.2243	IMPACT341	MSKCC	Lymph Node	NA	1.18	Stable	6	PRAD	Prostate	Tumor	1	734	Metastasis	Male	Matched	6.65493	70	NA	NA	NA	NA	NA	NA	NA	NA	NA	NA	NA	NA	NA	NA	NA	NA	NA	NA	NA	NA	NA	NA	NA
prad_cdk12_mskcc_2020	P-0000449	P-0000449-T01-IM3	prad_cdk12_mskcc_2020:P-0000449-T01-IM3	prad_cdk12_mskcc_2020:P-0000449	0	NO	Prostate Cancer	Prostate Adenocarcinoma	0.3454	IMPACT341	MSKCC	Bone	NA	4.76	Indeterminate	16	PRAD	Prostate	Tumor	1	919	Metastasis	Male	Matched	17.7465	20	NA	NA	NA	NA	NA	NA	NA	NA	NA	NA	NA	NA	NA	NA	NA	NA	NA	NA	NA	NA	NA	NA	NA
prad_cdk12_mskcc_2020	P-0000505	P-0000505-T02-IM6	prad_cdk12_mskcc_2020:P-0000505-T02-IM6	prad_cdk12_mskcc_2020:P-0000505	0	NO	Prostate Cancer	Prostate Adenocarcinoma	0.2005	IMPACT468	MSKCC	Lymph Node	MICROSATELLITE STABLE (MSS). See MSI note below.	0.44	Stable	7	PRAD	Prostate	Tumor	1	667	Metastasis	Male	Matched	6.05289	60	NA	NA	NA	NA	NA	NA	NA	NA	NA	NA	NA	NA	NA	NA	NA	NA	NA	NA	NA	NA	NA	NA	NA
prad_cdk12_mskcc_2020	P-0000509	P-0000509-T02-IM5	prad_cdk12_mskcc_2020:P-0000509-T02-IM5	prad_cdk12_mskcc_2020:P-0000509	0	NO	Prostate Cancer	Prostate Adenocarcinoma	0.277	IMPACT410	MSKCC	Soft Tissue	MICROSATELLITE STABLE (MSS). See MSI note below.	1.56	Stable	3	PRAD	Prostate	Tumor	1	1022	Metastasis	Male	Matched	2.93616	70	NA	NA	NA	NA	NA	NA	NA	NA	NA	NA	NA	NA	NA	NA	NA	NA	NA	NA	NA	NA	NA	NA	NA
prad_cdk12_mskcc_2020	P-0000521	P-0000521-T01-IM3	prad_cdk12_mskcc_2020:P-0000521-T01-IM3	prad_cdk12_mskcc_2020:P-0000521	0	NO	Prostate Cancer	Prostate Adenocarcinoma	0.2821	IMPACT341	MSKCC	Liver	MICROSATELLITE STABLE (MSS). See MSI note below.	0.39	Stable	NA	PRAD	Prostate	Tumor	1	919	Metastasis	Male	Matched	0	80	NA	NA	NA	NA	NA	NA	NA	NA	NA	NA	NA	NA	NA	NA	NA	NA	NA	NA	NA	NA	NA	NA	NA
prad_cdk12_mskcc_2020	P-0000600	P-0000600-T01-IM3	prad_cdk12_mskcc_2020:P-0000600-T01-IM3	prad_cdk12_mskcc_2020:P-0000600	0	NO	Prostate Cancer	Prostate Adenocarcinoma	0.1753	IMPACT341	MSKCC	Bone	NA	0.1	Stable	2	PRAD	Prostate	Tumor	1	814	Metastasis	Male	Matched	2.21831	50	NA	NA	NA	NA	NA	NA	NA	NA	NA	NA	NA	NA	NA	NA	NA	NA	NA	NA	NA	NA	NA	NA	NA
prad_cdk12_mskcc_2020	P-0000640	P-0000640-T03-IM5	prad_cdk12_mskcc_2020:P-0000640-T03-IM5	prad_cdk12_mskcc_2020:P-0000640	0	NO	Prostate Cancer	Prostate Adenocarcinoma	0.1287	IMPACT410	MSKCC	Spine	NA	0.16	Stable	2	PRAD	Prostate	Tumor	1	404	Metastasis	Male	Matched	1.95744	70	NA	NA	NA	NA	NA	NA	NA	NA	NA	NA	NA	NA	NA	NA	NA	NA	NA	NA	NA	NA	NA	NA	NA
prad_cdk12_mskcc_2020	P-0000655	P-0000655-T01-IM3	prad_cdk12_mskcc_2020:P-0000655-T01-IM3	prad_cdk12_mskcc_2020:P-0000655	0	NO	Prostate Cancer	Prostate Adenocarcinoma	0.1621	IMPACT341	MSKCC	Lung	NA	0.52	Stable	5	PRAD	Prostate	Tumor	1	614	Metastasis	Male	Matched	5.54578	70	NA	NA	NA	NA	NA	NA	NA	NA	NA	NA	NA	NA	NA	NA	NA	NA	NA	NA	NA	NA	NA	NA	NA
prad_cdk12_mskcc_2020	P-0000659	P-0000659-T01-IM3	prad_cdk12_mskcc_2020:P-0000659-T01-IM3	prad_cdk12_mskcc_2020:P-0000659	0	NO	Prostate Cancer	Prostate Adenocarcinoma	0.2003	IMPACT341	MSKCC	Lymph Node	MICROSATELLITE STABLE (MSS). See MSI note below.	0.84	Stable	4	PRAD	Prostate	Tumor	1	1267	Metastasis	Male	Matched	4.43662	60	NA	NA	NA	NA	NA	NA	NA	NA	NA	NA	NA	NA	NA	NA	NA	NA	NA	NA	NA	NA	NA	NA	NA
prad_cdk12_mskcc_2020	P-0000683	P-0000683-T01-IM3	prad_cdk12_mskcc_2020:P-0000683-T01-IM3	prad_cdk12_mskcc_2020:P-0000683	0	NO	Prostate Cancer	Prostate Adenocarcinoma	0.4323	IMPACT341	MSKCC	Urethra	NA	3.91	Indeterminate	6	PRAD	Prostate	Tumor	1	256	Metastasis	Male	Matched	6.65493	30	NA	NA	NA	NA	NA	NA	NA	NA	NA	NA	NA	NA	NA	NA	NA	NA	NA	NA	NA	NA	NA	NA	NA
prad_cdk12_mskcc_2020	P-0000842	P-0000842-T02-IM5	prad_cdk12_mskcc_2020:P-0000842-T02-IM5	prad_cdk12_mskcc_2020:P-0000842	0	NO	Prostate Cancer	Prostate Adenocarcinoma	0.3237	IMPACT410	MSKCC	Bone	NA	0.4	Stable	1	PRAD	Prostate	Tumor	1	395	Metastasis	Male	Matched	0.97872	20	NA	NA	NA	NA	NA	NA	NA	NA	NA	NA	NA	NA	NA	NA	NA	NA	NA	NA	NA	NA	NA	NA	NA
prad_cdk12_mskcc_2020	P-0000935	P-0000935-T01-IM3	prad_cdk12_mskcc_2020:P-0000935-T01-IM3	prad_cdk12_mskcc_2020:P-0000935	0	NO	Prostate Cancer	Prostate Adenocarcinoma	0.3718	IMPACT341	MSKCC	Liver	MICROSATELLITE STABLE (MSS). See MSI note below.	1.37	Stable	1	PRAD	Prostate	Tumor	1	578	Metastasis	Male	Unmatched	1.10916	30	NA	NA	NA	NA	NA	NA	NA	NA	NA	NA	NA	NA	NA	NA	NA	NA	NA	NA	NA	NA	NA	NA	NA
prad_cdk12_mskcc_2020	P-0000966	P-0000966-T02-IM3	prad_cdk12_mskcc_2020:P-0000966-T02-IM3	prad_cdk12_mskcc_2020:P-0000966	0	NO	Prostate Cancer	Prostate Adenocarcinoma	0.1846	IMPACT341	MSKCC	Bladder	NA	0.17	Stable	10	PRAD	Prostate	Tumor	1	537	Metastasis	Male	Matched	11.0916	30	NA	NA	NA	NA	NA	NA	NA	NA	NA	NA	NA	NA	NA	NA	NA	NA	NA	NA	NA	NA	NA	NA	NA
prad_cdk12_mskcc_2020	P-0001021	P-0001021-T01-IM3	prad_cdk12_mskcc_2020:P-0001021-T01-IM3	prad_cdk12_mskcc_2020:P-0001021	0	NO	Prostate Cancer	Prostate Adenocarcinoma	0.4944	IMPACT341	MSKCC	Lymph Node	NA	1.08	Stable	5	PRAD	Prostate	Tumor	1	1072	Metastasis	Male	Matched	5.54578	80	NA	NA	NA	NA	NA	NA	NA	NA	NA	NA	NA	NA	NA	NA	NA	NA	NA	NA	NA	NA	NA	NA	NA
prad_cdk12_mskcc_2020	P-0001092	P-0001092-T01-IM3	prad_cdk12_mskcc_2020:P-0001092-T01-IM3	prad_cdk12_mskcc_2020:P-0001092	0	NO	Prostate Cancer	Prostate Adenocarcinoma	0.3876	IMPACT341	MSKCC	Lymph Node	NA	1.28	Stable	6	PRAD	Prostate	Tumor	1	1068	Metastasis	Male	Matched	6.65493	50	NA	NA	NA	NA	NA	NA	NA	NA	NA	NA	NA	NA	NA	NA	NA	NA	NA	NA	NA	NA	NA	NA	NA
prad_cdk12_mskcc_2020	P-0001141	P-0001141-T01-IM3	prad_cdk12_mskcc_2020:P-0001141-T01-IM3	prad_cdk12_mskcc_2020:P-0001141	0	NO	Prostate Cancer	Prostate Adenocarcinoma	0.4983	IMPACT341	MSKCC	Liver	NA	1.23	Stable	3	PRAD	Prostate	Tumor	1	730	Metastasis	Male	Matched	3.32747	40	NA	NA	NA	NA	NA	NA	NA	NA	NA	NA	NA	NA	NA	NA	NA	NA	NA	NA	NA	NA	NA	NA	NA
prad_cdk12_mskcc_2020	P-0001204	P-0001204-T03-IM5	prad_cdk12_mskcc_2020:P-0001204-T03-IM5	prad_cdk12_mskcc_2020:P-0001204	0	NO	Prostate Cancer	Prostate Adenocarcinoma	0.6399	IMPACT410	MSKCC	Brain	NA	1.65	Stable	3	PRAD	Prostate	Tumor	1	827	Metastasis	Male	Matched	2.93616	70	NA	NA	NA	NA	NA	NA	NA	NA	NA	NA	NA	NA	NA	NA	NA	NA	NA	NA	NA	NA	NA	NA	NA
prad_cdk12_mskcc_2020	P-0001221	P-0001221-T02-IM5	prad_cdk12_mskcc_2020:P-0001221-T02-IM5	prad_cdk12_mskcc_2020:P-0001221	0	NO	Prostate Cancer	Prostate Adenocarcinoma	0.2903	IMPACT410	MSKCC	Soft Tissue	MICROSATELLITE STABLE (MSS). See MSI note below.	0.7	Stable	1	PRAD	Prostate	Tumor	1	883	Metastasis	Male	Matched	0.97872	70	NA	NA	NA	NA	NA	NA	NA	NA	NA	NA	NA	NA	NA	NA	NA	NA	NA	NA	NA	NA	NA	NA	NA
prad_cdk12_mskcc_2020	P-0001230	P-0001230-T01-IM3	prad_cdk12_mskcc_2020:P-0001230-T01-IM3	prad_cdk12_mskcc_2020:P-0001230	0	NO	Prostate Cancer	Prostate Adenocarcinoma	0.1945	IMPACT341	MSKCC	Bone	MICROSATELLITE STABLE (MSS). See MSI note below.	0.25	Stable	3	PRAD	Prostate	Tumor	1	515	Metastasis	Male	Matched	3.32747	30	NA	NA	NA	NA	NA	NA	NA	NA	NA	NA	NA	NA	NA	NA	NA	NA	NA	NA	NA	NA	NA	NA	NA
prad_cdk12_mskcc_2020	P-0001242	P-0001242-T02-IM3	prad_cdk12_mskcc_2020:P-0001242-T02-IM3	prad_cdk12_mskcc_2020:P-0001242	0	NO	Prostate Cancer	Prostate Adenocarcinoma	0.1975	IMPACT341	MSKCC	Bone	NA	0.09	Stable	2	PRAD	Prostate	Tumor	1	357	Metastasis	Male	Matched	2.21831	60	NA	NA	NA	NA	NA	NA	NA	NA	NA	NA	NA	NA	NA	NA	NA	NA	NA	NA	NA	NA	NA	NA	NA
prad_cdk12_mskcc_2020	P-0001244	P-0001244-T03-IM6	prad_cdk12_mskcc_2020:P-0001244-T03-IM6	prad_cdk12_mskcc_2020:P-0001244	0	NO	Prostate Cancer	Prostate Adenocarcinoma	0.205	IMPACT468	MSKCC	Bone	MICROSATELLITE STABLE (MSS). See MSI note below.	0.17	Stable	2	PRAD	Prostate	Tumor	1	665	Metastasis	Male	Matched	1.7294	50	NA	NA	NA	NA	NA	NA	NA	NA	NA	NA	NA	NA	NA	NA	NA	NA	NA	NA	NA	NA	NA	NA	NA
prad_cdk12_mskcc_2020	P-0001247	P-0001247-T01-IM3	prad_cdk12_mskcc_2020:P-0001247-T01-IM3	prad_cdk12_mskcc_2020:P-0001247	0	NO	Prostate Cancer	Prostate Adenocarcinoma	0.457	IMPACT341	MSKCC	Bone	NA	1.12	Stable	4	PRAD	Prostate	Tumor	1	566	Metastasis	Male	Matched	4.43662	60	NA	NA	NA	NA	NA	NA	NA	NA	NA	NA	NA	NA	NA	NA	NA	NA	NA	NA	NA	NA	NA	NA	NA
prad_cdk12_mskcc_2020	P-0001274	P-0001274-T01-IM3	prad_cdk12_mskcc_2020:P-0001274-T01-IM3	prad_cdk12_mskcc_2020:P-0001274	0	NO	Prostate Cancer	Prostate Adenocarcinoma	0.1097	IMPACT341	MSKCC	Lymph Node	NA	0.26	Stable	3	PRAD	Prostate	Tumor	1	731	Metastasis	Male	Matched	3.32747	30	NA	NA	NA	NA	NA	NA	NA	NA	NA	NA	NA	NA	NA	NA	NA	NA	NA	NA	NA	NA	NA	NA	NA
prad_cdk12_mskcc_2020	P-0001319	P-0001319-T05-IM5	prad_cdk12_mskcc_2020:P-0001319-T05-IM5	prad_cdk12_mskcc_2020:P-0001319	0	NO	Prostate Cancer	Prostate Adenocarcinoma	0.355	IMPACT410	MSKCC	Soft Tissue	NA	2.39	Stable	4	PRAD	Prostate	Tumor	1	1206	Metastasis	Male	Matched	3.91488	80	NA	NA	NA	NA	NA	NA	NA	NA	NA	NA	NA	NA	NA	NA	NA	NA	NA	NA	NA	NA	NA	NA	NA
prad_cdk12_mskcc_2020	P-0001332	P-0001332-T02-IM3	prad_cdk12_mskcc_2020:P-0001332-T02-IM3	prad_cdk12_mskcc_2020:P-0001332	0	NO	Prostate Cancer	Prostate Adenocarcinoma	0.0128	IMPACT341	MSKCC	Lymph Node	NA	0.3	Stable	2	PRAD	Prostate	Tumor	1	550	Metastasis	Male	Matched	2.21831	50	NA	NA	NA	NA	NA	NA	NA	NA	NA	NA	NA	NA	NA	NA	NA	NA	NA	NA	NA	NA	NA	NA	NA
prad_cdk12_mskcc_2020	P-0001382	P-0001382-T01-IM3	prad_cdk12_mskcc_2020:P-0001382-T01-IM3	prad_cdk12_mskcc_2020:P-0001382	0	NO	Prostate Cancer	Prostate Adenocarcinoma	0.0027	IMPACT341	MSKCC	Lung	NA	0	Stable	3	PRAD	Prostate	Tumor	1	619	Metastasis	Male	Matched	3.32747	15	NA	NA	NA	NA	NA	NA	NA	NA	NA	NA	NA	NA	NA	NA	NA	NA	NA	NA	NA	NA	NA	NA	NA
prad_cdk12_mskcc_2020	P-0001426	P-0001426-T01-IM3	prad_cdk12_mskcc_2020:P-0001426-T01-IM3	prad_cdk12_mskcc_2020:P-0001426	0	NO	Prostate Cancer	Prostate Adenocarcinoma	0.3625	IMPACT341	MSKCC	Lymph Node	NA	0.95	Stable	12	PRAD	Prostate	Tumor	1	829	Metastasis	Male	Matched	13.3099	70	NA	NA	NA	NA	NA	NA	NA	NA	NA	NA	NA	NA	NA	NA	NA	NA	NA	NA	NA	NA	NA	NA	NA
prad_cdk12_mskcc_2020	P-0001445	P-0001445-T01-IM3	prad_cdk12_mskcc_2020:P-0001445-T01-IM3	prad_cdk12_mskcc_2020:P-0001445	0	NO	Prostate Cancer	Prostate Adenocarcinoma	0.5991	IMPACT341	MSKCC	Bone	MICROSATELLITE STABLE (MSS). See MSI note below.	0.87	Stable	3	PRAD	Prostate	Tumor	1	537	Metastasis	Male	Matched	3.32747	15	NA	NA	NA	NA	NA	NA	NA	NA	NA	NA	NA	NA	NA	NA	NA	NA	NA	NA	NA	NA	NA	NA	NA
prad_cdk12_mskcc_2020	P-0001446	P-0001446-T01-IM3	prad_cdk12_mskcc_2020:P-0001446-T01-IM3	prad_cdk12_mskcc_2020:P-0001446	0	NO	Prostate Cancer	Prostate Adenocarcinoma	0.5121	IMPACT341	MSKCC	Kidney	NA	2.41	Stable	6	PRAD	Prostate	Tumor	1	674	Metastasis	Male	Matched	6.65493	40	NA	NA	NA	NA	NA	NA	NA	NA	NA	NA	NA	NA	NA	NA	NA	NA	NA	NA	NA	NA	NA	NA	NA
prad_cdk12_mskcc_2020	P-0001449	P-0001449-T02-IM5	prad_cdk12_mskcc_2020:P-0001449-T02-IM5	prad_cdk12_mskcc_2020:P-0001449	0	NO	Prostate Cancer	Prostate Adenocarcinoma	0.2221	IMPACT410	MSKCC	Bone	MICROSATELLITE STABLE (MSS). See MSI note below.	0.56	Stable	4	PRAD	Prostate	Tumor	1	807	Metastasis	Male	Matched	3.91488	50	NA	NA	NA	NA	NA	NA	NA	NA	NA	NA	NA	NA	NA	NA	NA	NA	NA	NA	NA	NA	NA	NA	NA
prad_cdk12_mskcc_2020	P-0001639	P-0001639-T02-IM6	prad_cdk12_mskcc_2020:P-0001639-T02-IM6	prad_cdk12_mskcc_2020:P-0001639	0	NO	Prostate Cancer	Prostate Adenocarcinoma	0.3632	IMPACT468	MSKCC	Lymph Node	NA	0.88	Do not report	2	PRAD	Prostate	Tumor	1	626	Metastasis	Male	Matched	1.7294	60	NA	NA	NA	NA	NA	NA	NA	NA	NA	NA	NA	NA	NA	NA	NA	NA	NA	NA	NA	NA	NA	NA	NA
prad_cdk12_mskcc_2020	P-0001697	P-0001697-T02-IM3	prad_cdk12_mskcc_2020:P-0001697-T02-IM3	prad_cdk12_mskcc_2020:P-0001697	0	NO	Prostate Cancer	Prostate Adenocarcinoma	0.3458	IMPACT341	MSKCC	Bone	MICROSATELLITE STABLE (MSS). See MSI note below.	0.37	Stable	3	PRAD	Prostate	Tumor	1	247	Metastasis	Male	Matched	3.32747	NA	NA	NA	NA	NA	NA	NA	NA	NA	NA	NA	NA	NA	NA	NA	NA	NA	NA	NA	NA	NA	NA	NA	NA
prad_cdk12_mskcc_2020	P-0001698	P-0001698-T01-IM3	prad_cdk12_mskcc_2020:P-0001698-T01-IM3	prad_cdk12_mskcc_2020:P-0001698	0	NO	Prostate Cancer	Prostate Adenocarcinoma	0.5929	IMPACT341	MSKCC	Pelvis	NA	1.06	Stable	5	PRAD	Prostate	Tumor	1	792	Metastasis	Male	Matched	5.54578	60	NA	NA	NA	NA	NA	NA	NA	NA	NA	NA	NA	NA	NA	NA	NA	NA	NA	NA	NA	NA	NA	NA	NA
prad_cdk12_mskcc_2020	P-0001717	P-0001717-T01-IM3	prad_cdk12_mskcc_2020:P-0001717-T01-IM3	prad_cdk12_mskcc_2020:P-0001717	0	NO	Prostate Cancer	Prostate Adenocarcinoma	0.4156	IMPACT341	MSKCC	Retroperitoneum	NA	0.22	Stable	1	PRAD	Prostate	Tumor	1	663	Metastasis	Male	Matched	1.10916	40	NA	NA	NA	NA	NA	NA	NA	NA	NA	NA	NA	NA	NA	NA	NA	NA	NA	NA	NA	NA	NA	NA	NA
prad_cdk12_mskcc_2020	P-0001768	P-0001768-T02-IM6	prad_cdk12_mskcc_2020:P-0001768-T02-IM6	prad_cdk12_mskcc_2020:P-0001768	0	NO	Prostate Cancer	Prostate Adenocarcinoma	0.3511	IMPACT468	MSKCC	Lymph Node	MICROSATELLITE STABLE (MSS). See MSI note below.	0.45	Stable	8	PRAD	Prostate	Tumor	1	876	Metastasis	Male	Matched	6.91758	10	NA	NA	NA	NA	NA	NA	NA	NA	NA	NA	NA	NA	NA	NA	NA	NA	NA	NA	NA	NA	NA	NA	NA
prad_cdk12_mskcc_2020	P-0001795	P-0001795-T01-IM3	prad_cdk12_mskcc_2020:P-0001795-T01-IM3	prad_cdk12_mskcc_2020:P-0001795	0	NO	Prostate Cancer	Prostate Adenocarcinoma	0.5144	IMPACT341	MSKCC	Soft Tissue	NA	0.95	Stable	2	PRAD	Prostate	Tumor	1	1293	Metastasis	Male	Matched	2.21831	40	NA	NA	NA	NA	NA	NA	NA	NA	NA	NA	NA	NA	NA	NA	NA	NA	NA	NA	NA	NA	NA	NA	NA
prad_cdk12_mskcc_2020	P-0001859	P-0001859-T01-IM3	prad_cdk12_mskcc_2020:P-0001859-T01-IM3	prad_cdk12_mskcc_2020:P-0001859	0	NO	Prostate Cancer	Prostate Adenocarcinoma	0.2058	IMPACT341	MSKCC	Lymph Node	NA	0.09	Stable	6	PRAD	Prostate	Tumor	1	1139	Metastasis	Male	Matched	6.65493	40	NA	NA	NA	NA	NA	NA	NA	NA	NA	NA	NA	NA	NA	NA	NA	NA	NA	NA	NA	NA	NA	NA	NA
prad_cdk12_mskcc_2020	P-0001884	P-0001884-T01-IM3	prad_cdk12_mskcc_2020:P-0001884-T01-IM3	prad_cdk12_mskcc_2020:P-0001884	0	NO	Prostate Cancer	Prostate Adenocarcinoma	0.1583	IMPACT341	MSKCC	Bone	NA	0	Stable	8	PRAD	Prostate	Tumor	1	682	Metastasis	Male	Matched	8.87324	15	NA	NA	NA	NA	NA	NA	NA	NA	NA	NA	NA	NA	NA	NA	NA	NA	NA	NA	NA	NA	NA	NA	NA
prad_cdk12_mskcc_2020	P-0002303	P-0002303-T01-IM3	prad_cdk12_mskcc_2020:P-0002303-T01-IM3	prad_cdk12_mskcc_2020:P-0002303	0	NO	Prostate Cancer	Prostate Adenocarcinoma	0.23	IMPACT341	MSKCC	Lymph Node	NA	0.53	Stable	6	PRAD	Prostate	Tumor	1	773	Metastasis	Male	Unmatched	6.65493	20	NA	NA	NA	NA	NA	NA	NA	NA	NA	NA	NA	NA	NA	NA	NA	NA	NA	NA	NA	NA	NA	NA	NA
prad_cdk12_mskcc_2020	P-0002304	P-0002304-T01-IM3	prad_cdk12_mskcc_2020:P-0002304-T01-IM3	prad_cdk12_mskcc_2020:P-0002304	0	NO	Prostate Cancer	Prostate Adenocarcinoma	0.1486	IMPACT341	MSKCC	Testis	NA	0.43	Stable	5	PRAD	Prostate	Tumor	1	801	Metastasis	Male	Matched	5.54578	20	NA	NA	NA	NA	NA	NA	NA	NA	NA	NA	NA	NA	NA	NA	NA	NA	NA	NA	NA	NA	NA	NA	NA
prad_cdk12_mskcc_2020	P-0002375	P-0002375-T02-IM6	prad_cdk12_mskcc_2020:P-0002375-T02-IM6	prad_cdk12_mskcc_2020:P-0002375	0	NO	Prostate Cancer	Prostate Adenocarcinoma	0.119	IMPACT468	MSKCC	Muscle	MICROSATELLITE STABLE (MSS). See MSI note below.	0.05	Stable	8	PRAD	Prostate	Tumor	1	699	Metastasis	Male	Matched	6.91758	20	NA	NA	NA	NA	NA	NA	NA	NA	NA	NA	NA	NA	NA	NA	NA	NA	NA	NA	NA	NA	NA	NA	NA
prad_cdk12_mskcc_2020	P-0002398	P-0002398-T01-IM3	prad_cdk12_mskcc_2020:P-0002398-T01-IM3	prad_cdk12_mskcc_2020:P-0002398	0	NO	Prostate Cancer	Prostate Adenocarcinoma	0.1729	IMPACT341	MSKCC	Lymph Node	MICROSATELLITE STABLE (MSS). See MSI note below.	0	Stable	3	PRAD	Prostate	Tumor	1	659	Metastasis	Male	Matched	3.32747	60	NA	NA	NA	NA	NA	NA	NA	NA	NA	NA	NA	NA	NA	NA	NA	NA	NA	NA	NA	NA	NA	NA	NA
prad_cdk12_mskcc_2020	P-0002431	P-0002431-T02-IM6	prad_cdk12_mskcc_2020:P-0002431-T02-IM6	prad_cdk12_mskcc_2020:P-0002431	0	NO	Prostate Cancer	Prostate Adenocarcinoma	0.0005	IMPACT468	MSKCC	Bone	NA	0	Do not report	2	PRAD	Prostate	Tumor	1	717	Metastasis	Male	Matched	1.7294	20	NA	NA	NA	NA	NA	NA	NA	NA	NA	NA	NA	NA	NA	NA	NA	NA	NA	NA	NA	NA	NA	NA	NA
prad_cdk12_mskcc_2020	P-0002432	P-0002432-T01-IM3	prad_cdk12_mskcc_2020:P-0002432-T01-IM3	prad_cdk12_mskcc_2020:P-0002432	0	NO	Prostate Cancer	Prostate Adenocarcinoma	0.0018	IMPACT341	MSKCC	Bone	MICROSATELLITE STABLE (MSS). See MSI note below.	0	Stable	NA	PRAD	Prostate	Tumor	1	724	Metastasis	Male	Matched	0	10	NA	NA	NA	NA	NA	NA	NA	NA	NA	NA	NA	NA	NA	NA	NA	NA	NA	NA	NA	NA	NA	NA	NA
prad_cdk12_mskcc_2020	P-0002516	P-0002516-T01-IM3	prad_cdk12_mskcc_2020:P-0002516-T01-IM3	prad_cdk12_mskcc_2020:P-0002516	0	NO	Prostate Cancer	Prostate Adenocarcinoma	0.6124	IMPACT341	MSKCC	Lymph Node	NA	-1	Do not report	1	PRAD	Prostate	Tumor	1	1039	Metastasis	Male	Unmatched	1.10916	NA	NA	NA	NA	NA	NA	NA	NA	NA	NA	NA	NA	NA	NA	NA	NA	NA	NA	NA	NA	NA	NA	NA	NA
prad_cdk12_mskcc_2020	P-0002537	P-0002537-T02-IM5	prad_cdk12_mskcc_2020:P-0002537-T02-IM5	prad_cdk12_mskcc_2020:P-0002537	0	NO	Prostate Cancer	Prostate Adenocarcinoma	0.2036	IMPACT410	MSKCC	Bone	MICROSATELLITE STABLE (MSS). See MSI note below.	0.38	Stable	2	PRAD	Prostate	Tumor	1	669	Metastasis	Male	Matched	1.95744	50	NA	NA	NA	NA	NA	NA	NA	NA	NA	NA	NA	NA	NA	NA	NA	NA	NA	NA	NA	NA	NA	NA	NA
prad_cdk12_mskcc_2020	P-0002564	P-0002564-T01-IM3	prad_cdk12_mskcc_2020:P-0002564-T01-IM3	prad_cdk12_mskcc_2020:P-0002564	0	NO	Prostate Cancer	Prostate Adenocarcinoma	0.2223	IMPACT341	MSKCC	Lymph Node	NA	0.29	Stable	1	PRAD	Prostate	Tumor	1	468	Metastasis	Male	Matched	1.10916	50	NA	NA	NA	NA	NA	NA	NA	NA	NA	NA	NA	NA	NA	NA	NA	NA	NA	NA	NA	NA	NA	NA	NA
prad_cdk12_mskcc_2020	P-0002612	P-0002612-T02-IM6	prad_cdk12_mskcc_2020:P-0002612-T02-IM6	prad_cdk12_mskcc_2020:P-0002612	0	NO	Prostate Cancer	Prostate Adenocarcinoma	0.0015	IMPACT468	MSKCC	Liver	MICROSATELLITE STABLE (MSS). See MSI note below.	0	Stable	NA	PRAD	Prostate	Tumor	1	413	Metastasis	Male	Matched	0	80	NA	NA	NA	NA	NA	NA	NA	NA	NA	NA	NA	NA	NA	NA	NA	NA	NA	NA	NA	NA	NA	NA	NA
prad_cdk12_mskcc_2020	P-0002739	P-0002739-T03-IM6	prad_cdk12_mskcc_2020:P-0002739-T03-IM6	prad_cdk12_mskcc_2020:P-0002739	0	NO	Prostate Cancer	Prostate Adenocarcinoma	0.3021	IMPACT468	MSKCC	Brain	MICROSATELLITE STABLE (MSS). See MSI note below.	0.81	Stable	NA	PRAD	Prostate	Tumor	1	706	Metastasis	Male	Matched	0	80	NA	NA	NA	NA	NA	NA	NA	NA	NA	NA	NA	NA	NA	NA	NA	NA	NA	NA	NA	NA	NA	NA	NA
prad_cdk12_mskcc_2020	P-0002740	P-0002740-T01-IM3	prad_cdk12_mskcc_2020:P-0002740-T01-IM3	prad_cdk12_mskcc_2020:P-0002740	0	NO	Prostate Cancer	Prostate Adenocarcinoma	0.0071	IMPACT341	MSKCC	Lymph Node	NA	0.86	Stable	4	PRAD	Prostate	Tumor	1	271	Metastasis	Male	Matched	4.43662	20	NA	NA	NA	NA	NA	NA	NA	NA	NA	NA	NA	NA	NA	NA	NA	NA	NA	NA	NA	NA	NA	NA	NA
prad_cdk12_mskcc_2020	P-0002796	P-0002796-T01-IM3	prad_cdk12_mskcc_2020:P-0002796-T01-IM3	prad_cdk12_mskcc_2020:P-0002796	0	NO	Prostate Cancer	Prostate Adenocarcinoma	0.1314	IMPACT341	MSKCC	Lymph Node	NA	0.11	Stable	3	PRAD	Prostate	Tumor	1	281	Metastasis	Male	Matched	3.32747	20	NA	NA	NA	NA	NA	NA	NA	NA	NA	NA	NA	NA	NA	NA	NA	NA	NA	NA	NA	NA	NA	NA	NA
prad_cdk12_mskcc_2020	P-0002840	P-0002840-T02-IM3	prad_cdk12_mskcc_2020:P-0002840-T02-IM3	prad_cdk12_mskcc_2020:P-0002840	0	NO	Prostate Cancer	Prostate Adenocarcinoma	0	IMPACT341	MSKCC	Lymph Node	NA	0.16	Stable	3	PRAD	Prostate	Tumor	1	767	Metastasis	Male	Matched	3.32747	60	NA	NA	NA	NA	NA	NA	NA	NA	NA	NA	NA	NA	NA	NA	NA	NA	NA	NA	NA	NA	NA	NA	NA
prad_cdk12_mskcc_2020	P-0002894	P-0002894-T01-IM3	prad_cdk12_mskcc_2020:P-0002894-T01-IM3	prad_cdk12_mskcc_2020:P-0002894	0	NO	Prostate Cancer	Prostate Adenocarcinoma	0.4927	IMPACT341	MSKCC	Liver	NA	0.98	Stable	1	PRAD	Prostate	Tumor	1	663	Metastasis	Male	Matched	1.10916	50	NA	NA	NA	NA	NA	NA	NA	NA	NA	NA	NA	NA	NA	NA	NA	NA	NA	NA	NA	NA	NA	NA	NA
prad_cdk12_mskcc_2020	P-0002898	P-0002898-T02-IM5	prad_cdk12_mskcc_2020:P-0002898-T02-IM5	prad_cdk12_mskcc_2020:P-0002898	0	NO	Prostate Cancer	Prostate Adenocarcinoma	0.2005	IMPACT410	MSKCC	Lymph Node	NA	0.23	Stable	6	PRAD	Prostate	Tumor	1	576	Metastasis	Male	Matched	5.87232	80	NA	NA	NA	NA	NA	NA	NA	NA	NA	NA	NA	NA	NA	NA	NA	NA	NA	NA	NA	NA	NA	NA	NA
prad_cdk12_mskcc_2020	P-0002901	P-0002901-T01-IM3	prad_cdk12_mskcc_2020:P-0002901-T01-IM3	prad_cdk12_mskcc_2020:P-0002901	0	NO	Prostate Cancer	Prostate Adenocarcinoma	0.4539	IMPACT341	MSKCC	Lymph Node	MICROSATELLITE STABLE (MSS). See MSI note below.	0.56	Stable	2	PRAD	Prostate	Tumor	1	364	Metastasis	Male	Matched	2.21831	60	NA	NA	NA	NA	NA	NA	NA	NA	NA	NA	NA	NA	NA	NA	NA	NA	NA	NA	NA	NA	NA	NA	NA
prad_cdk12_mskcc_2020	P-0002984	P-0002984-T01-IM3	prad_cdk12_mskcc_2020:P-0002984-T01-IM3	prad_cdk12_mskcc_2020:P-0002984	0	NO	Prostate Cancer	Prostate Adenocarcinoma	0.311	IMPACT341	MSKCC	Bone	NA	1.19	Stable	5	PRAD	Prostate	Tumor	1	637	Metastasis	Male	Matched	5.54578	50	NA	NA	NA	NA	NA	NA	NA	NA	NA	NA	NA	NA	NA	NA	NA	NA	NA	NA	NA	NA	NA	NA	NA
prad_cdk12_mskcc_2020	P-0002990	P-0002990-T01-IM3	prad_cdk12_mskcc_2020:P-0002990-T01-IM3	prad_cdk12_mskcc_2020:P-0002990	0	NO	Prostate Cancer	Prostate Adenocarcinoma	0.2166	IMPACT341	MSKCC	Lymph Node	NA	0	Stable	2	PRAD	Prostate	Tumor	1	702	Metastasis	Male	Matched	2.21831	70	NA	NA	NA	NA	NA	NA	NA	NA	NA	NA	NA	NA	NA	NA	NA	NA	NA	NA	NA	NA	NA	NA	NA
prad_cdk12_mskcc_2020	P-0003033	P-0003033-T02-IM5	prad_cdk12_mskcc_2020:P-0003033-T02-IM5	prad_cdk12_mskcc_2020:P-0003033	0	NO	Prostate Cancer	Prostate Adenocarcinoma	0.3121	IMPACT410	MSKCC	Liver	NA	0.54	Stable	3	PRAD	Prostate	Tumor	1	596	Metastasis	Male	Matched	2.93616	50	NA	NA	NA	NA	NA	NA	NA	NA	NA	NA	NA	NA	NA	NA	NA	NA	NA	NA	NA	NA	NA	NA	NA
prad_cdk12_mskcc_2020	P-0003040	P-0003040-T01-IM5	prad_cdk12_mskcc_2020:P-0003040-T01-IM5	prad_cdk12_mskcc_2020:P-0003040	0	NO	Prostate Cancer	Prostate Adenocarcinoma	0.5161	IMPACT410	MSKCC	Liver	MICROSATELLITE STABLE (MSS). See MSI note below.	2.12	Stable	3	PRAD	Prostate	Tumor	1	791	Metastasis	Male	Matched	2.93616	70	NA	NA	NA	NA	NA	NA	NA	NA	NA	NA	NA	NA	NA	NA	NA	NA	NA	NA	NA	NA	NA	NA	NA
prad_cdk12_mskcc_2020	P-0003101	P-0003101-T03-IM5	prad_cdk12_mskcc_2020:P-0003101-T03-IM5	prad_cdk12_mskcc_2020:P-0003101	0	NO	Prostate Cancer	Prostate Adenocarcinoma	0.1656	IMPACT410	MSKCC	Brain	NA	1.23	Stable	5	PRAD	Prostate	Tumor	1	1013	Metastasis	Male	Matched	4.8936	80	NA	NA	NA	NA	NA	NA	NA	NA	NA	NA	NA	NA	NA	NA	NA	NA	NA	NA	NA	NA	NA	NA	NA
prad_cdk12_mskcc_2020	P-0003139	P-0003139-T02-IM5	prad_cdk12_mskcc_2020:P-0003139-T02-IM5	prad_cdk12_mskcc_2020:P-0003139	0	NO	Prostate Cancer	Prostate Adenocarcinoma	0.5057	IMPACT410	MSKCC	Bone	NA	1.59	Stable	1	PRAD	Prostate	Tumor	1	918	Metastasis	Male	Matched	0.97872	70	NA	NA	NA	NA	NA	NA	NA	NA	NA	NA	NA	NA	NA	NA	NA	NA	NA	NA	NA	NA	NA	NA	NA
prad_cdk12_mskcc_2020	P-0003150	P-0003150-T01-IM5	prad_cdk12_mskcc_2020:P-0003150-T01-IM5	prad_cdk12_mskcc_2020:P-0003150	0	NO	Prostate Cancer	Prostate Adenocarcinoma	0.3933	IMPACT410	MSKCC	Lung	NA	0.41	Stable	2	PRAD	Prostate	Tumor	1	221	Metastasis	Male	Matched	1.95744	60	NA	NA	NA	NA	NA	NA	NA	NA	NA	NA	NA	NA	NA	NA	NA	NA	NA	NA	NA	NA	NA	NA	NA
prad_cdk12_mskcc_2020	P-0003226	P-0003226-T01-IM5	prad_cdk12_mskcc_2020:P-0003226-T01-IM5	prad_cdk12_mskcc_2020:P-0003226	0	NO	Prostate Cancer	Prostate Adenocarcinoma	0.2004	IMPACT410	MSKCC	Bone	NA	0.66	Stable	3	PRAD	Prostate	Tumor	1	459	Metastasis	Male	Matched	2.93616	20	NA	NA	NA	NA	NA	NA	NA	NA	NA	NA	NA	NA	NA	NA	NA	NA	NA	NA	NA	NA	NA	NA	NA
prad_cdk12_mskcc_2020	P-0003395	P-0003395-T01-IM5	prad_cdk12_mskcc_2020:P-0003395-T01-IM5	prad_cdk12_mskcc_2020:P-0003395	0	NO	Prostate Cancer	Prostate Adenocarcinoma	0.5793	IMPACT410	MSKCC	Bone	MICROSATELLITE STABLE (MSS). See MSI note below.	0.66	Stable	2	PRAD	Prostate	Tumor	1	441	Metastasis	Male	Matched	1.95744	30	NA	NA	NA	NA	NA	NA	NA	NA	NA	NA	NA	NA	NA	NA	NA	NA	NA	NA	NA	NA	NA	NA	NA
prad_cdk12_mskcc_2020	P-0003442	P-0003442-T02-IM5	prad_cdk12_mskcc_2020:P-0003442-T02-IM5	prad_cdk12_mskcc_2020:P-0003442	0	NO	Prostate Cancer	Prostate Adenocarcinoma	0.289	IMPACT410	MSKCC	Bladder	NA	2.15	Stable	4	PRAD	Prostate	Tumor	1	578	Metastasis	Male	Matched	3.91488	80	NA	NA	NA	NA	NA	NA	NA	NA	NA	NA	NA	NA	NA	NA	NA	NA	NA	NA	NA	NA	NA	NA	NA
prad_cdk12_mskcc_2020	P-0003450	P-0003450-T01-IM5	prad_cdk12_mskcc_2020:P-0003450-T01-IM5	prad_cdk12_mskcc_2020:P-0003450	0	NO	Prostate Cancer	Prostate Adenocarcinoma	0.5876	IMPACT410	MSKCC	Retroperitoneum	NA	1.18	Stable	3	PRAD	Prostate	Tumor	1	715	Metastasis	Male	Matched	2.93616	70	NA	NA	NA	NA	NA	NA	NA	NA	NA	NA	NA	NA	NA	NA	NA	NA	NA	NA	NA	NA	NA	NA	NA
prad_cdk12_mskcc_2020	P-0003468	P-0003468-T02-IM5	prad_cdk12_mskcc_2020:P-0003468-T02-IM5	prad_cdk12_mskcc_2020:P-0003468	0	NO	Prostate Cancer	Prostate Adenocarcinoma	0.3498	IMPACT410	MSKCC	Lymph Node	NA	0.62	Stable	5	PRAD	Prostate	Tumor	1	382	Metastasis	Male	Matched	4.8936	60	NA	NA	NA	NA	NA	NA	NA	NA	NA	NA	NA	NA	NA	NA	NA	NA	NA	NA	NA	NA	NA	NA	NA
prad_cdk12_mskcc_2020	P-0003525	P-0003525-T01-IM5	prad_cdk12_mskcc_2020:P-0003525-T01-IM5	prad_cdk12_mskcc_2020:P-0003525	0	NO	Prostate Cancer	Prostate Adenocarcinoma	0.0008	IMPACT410	MSKCC	Pleura	MICROSATELLITE STABLE (MSS). See MSI note below.	0	Stable	NA	PRAD	Prostate	Tumor	1	476	Metastasis	Male	Matched	0	10	NA	NA	NA	NA	NA	NA	NA	NA	NA	NA	NA	NA	NA	NA	NA	NA	NA	NA	NA	NA	NA	NA	NA
prad_cdk12_mskcc_2020	P-0003535	P-0003535-T01-IM5	prad_cdk12_mskcc_2020:P-0003535-T01-IM5	prad_cdk12_mskcc_2020:P-0003535	0	NO	Prostate Cancer	Prostate Adenocarcinoma	0.5903	IMPACT410	MSKCC	Liver	NA	1.16	Stable	2	PRAD	Prostate	Tumor	1	921	Metastasis	Male	Matched	1.95744	80	NA	NA	NA	NA	NA	NA	NA	NA	NA	NA	NA	NA	NA	NA	NA	NA	NA	NA	NA	NA	NA	NA	NA
prad_cdk12_mskcc_2020	P-0003592	P-0003592-T01-IM5	prad_cdk12_mskcc_2020:P-0003592-T01-IM5	prad_cdk12_mskcc_2020:P-0003592	0	NO	Prostate Cancer	Prostate Adenocarcinoma	0.2244	IMPACT410	MSKCC	Lymph Node	NA	0.16	Stable	3	PRAD	Prostate	Tumor	1	404	Metastasis	Male	Matched	2.93616	60	NA	NA	NA	NA	NA	NA	NA	NA	NA	NA	NA	NA	NA	NA	NA	NA	NA	NA	NA	NA	NA	NA	NA
prad_cdk12_mskcc_2020	P-0003616	P-0003616-T01-IM5	prad_cdk12_mskcc_2020:P-0003616-T01-IM5	prad_cdk12_mskcc_2020:P-0003616	0	NO	Prostate Cancer	Prostate Adenocarcinoma	0.0519	IMPACT410	MSKCC	Lymph Node	NA	0.78	Stable	4	PRAD	Prostate	Tumor	1	142	Metastasis	Male	Matched	3.91488	60	NA	NA	NA	NA	NA	NA	NA	NA	NA	NA	NA	NA	NA	NA	NA	NA	NA	NA	NA	NA	NA	NA	NA
prad_cdk12_mskcc_2020	P-0003619	P-0003619-T01-IM5	prad_cdk12_mskcc_2020:P-0003619-T01-IM5	prad_cdk12_mskcc_2020:P-0003619	0	NO	Prostate Cancer	Prostate Adenocarcinoma	0.5331	IMPACT410	MSKCC	Retroperitoneum	NA	1.21	Stable	2	PRAD	Prostate	Tumor	1	472	Metastasis	Male	Matched	1.95744	80	NA	NA	NA	NA	NA	NA	NA	NA	NA	NA	NA	NA	NA	NA	NA	NA	NA	NA	NA	NA	NA	NA	NA
prad_cdk12_mskcc_2020	P-0003625	P-0003625-T01-IM5	prad_cdk12_mskcc_2020:P-0003625-T01-IM5	prad_cdk12_mskcc_2020:P-0003625	0	NO	Prostate Cancer	Prostate Adenocarcinoma	0.4703	IMPACT410	MSKCC	Lymph Node	NA	1.37	Stable	7	PRAD	Prostate	Tumor	1	455	Metastasis	Male	Matched	6.85104	70	NA	NA	NA	NA	NA	NA	NA	NA	NA	NA	NA	NA	NA	NA	NA	NA	NA	NA	NA	NA	NA	NA	NA
prad_cdk12_mskcc_2020	P-0003626	P-0003626-T01-IM5	prad_cdk12_mskcc_2020:P-0003626-T01-IM5	prad_cdk12_mskcc_2020:P-0003626	0	NO	Prostate Cancer	Prostate Adenocarcinoma	0.6049	IMPACT410	MSKCC	Lymph Node	MICROSATELLITE STABLE (MSS). See MSI note below.	0.88	Stable	NA	PRAD	Prostate	Tumor	1	575	Metastasis	Male	Matched	0	30	NA	NA	NA	NA	NA	NA	NA	NA	NA	NA	NA	NA	NA	NA	NA	NA	NA	NA	NA	NA	NA	NA	NA
prad_cdk12_mskcc_2020	P-0003678	P-0003678-T02-IM6	prad_cdk12_mskcc_2020:P-0003678-T02-IM6	prad_cdk12_mskcc_2020:P-0003678	0	NO	Prostate Cancer	Prostate Adenocarcinoma	0.13	IMPACT468	MSKCC	Bone	MICROSATELLITE STABLE (MSS). See MSI note below.	0.16	Stable	9	PRAD	Prostate	Tumor	1	646	Metastasis	Male	Matched	7.78228	20	NA	NA	NA	NA	NA	NA	NA	NA	NA	NA	NA	NA	NA	NA	NA	NA	NA	NA	NA	NA	NA	NA	NA
prad_cdk12_mskcc_2020	P-0003684	P-0003684-T02-IM6	prad_cdk12_mskcc_2020:P-0003684-T02-IM6	prad_cdk12_mskcc_2020:P-0003684	0	YES	Prostate Cancer	Prostate Adenocarcinoma	0.2145	IMPACT468	MSKCC	Pelvis	NA	0.42	Do not report	1	PRAD	Prostate	Tumor	1	772	Metastasis	Male	Matched	0.864698	40	NA	NA	NA	NA	NA	NA	NA	NA	NA	NA	NA	NA	NA	NA	NA	NA	NA	NA	NA	NA	NA	NA	NA
prad_cdk12_mskcc_2020	P-0003856	P-0003856-T01-IM5	prad_cdk12_mskcc_2020:P-0003856-T01-IM5	prad_cdk12_mskcc_2020:P-0003856	0	NO	Prostate Cancer	Prostate Adenocarcinoma	0.1647	IMPACT410	MSKCC	Liver	NA	0	Stable	1	PRAD	Prostate	Tumor	1	329	Metastasis	Male	Matched	0.97872	70	NA	NA	NA	NA	NA	NA	NA	NA	NA	NA	NA	NA	NA	NA	NA	NA	NA	NA	NA	NA	NA	NA	NA
prad_cdk12_mskcc_2020	P-0003908	P-0003908-T01-IM3	prad_cdk12_mskcc_2020:P-0003908-T01-IM3	prad_cdk12_mskcc_2020:P-0003908	0	NO	Prostate Cancer	Prostate Adenocarcinoma	0.0334	IMPACT341	MSKCC	Pelvis	NA	0	Stable	2	PRAD	Prostate	Tumor	1	704	Metastasis	Male	Matched	2.21831	70	NA	NA	NA	NA	NA	NA	NA	NA	NA	NA	NA	NA	NA	NA	NA	NA	NA	NA	NA	NA	NA	NA	NA
prad_cdk12_mskcc_2020	P-0003925	P-0003925-T01-IM3	prad_cdk12_mskcc_2020:P-0003925-T01-IM3	prad_cdk12_mskcc_2020:P-0003925	0	NO	Prostate Cancer	Prostate Adenocarcinoma	0.1975	IMPACT341	MSKCC	Lymph Node	NA	0	Stable	4	PRAD	Prostate	Tumor	1	670	Metastasis	Male	Matched	4.43662	60	NA	NA	NA	NA	NA	NA	NA	NA	NA	NA	NA	NA	NA	NA	NA	NA	NA	NA	NA	NA	NA	NA	NA
prad_cdk12_mskcc_2020	P-0003945	P-0003945-T01-IM3	prad_cdk12_mskcc_2020:P-0003945-T01-IM3	prad_cdk12_mskcc_2020:P-0003945	0	NO	Prostate Cancer	Prostate Adenocarcinoma	0.1043	IMPACT341	MSKCC	Bladder Neck	NA	0.09	Stable	2	PRAD	Prostate	Tumor	1	534	Metastasis	Male	Matched	2.21831	90	NA	NA	NA	NA	NA	NA	NA	NA	NA	NA	NA	NA	NA	NA	NA	NA	NA	NA	NA	NA	NA	NA	NA
prad_cdk12_mskcc_2020	P-0004061	P-0004061-T02-IM5	prad_cdk12_mskcc_2020:P-0004061-T02-IM5	prad_cdk12_mskcc_2020:P-0004061	0	NO	Prostate Cancer	Prostate Adenocarcinoma	0.1671	IMPACT410	MSKCC	Bladder	NA	0.9	Stable	2	PRAD	Prostate	Tumor	1	716	Metastasis	Male	Matched	1.95744	50	NA	NA	NA	NA	NA	NA	NA	NA	NA	NA	NA	NA	NA	NA	NA	NA	NA	NA	NA	NA	NA	NA	NA
prad_cdk12_mskcc_2020	P-0004138	P-0004138-T02-IM6	prad_cdk12_mskcc_2020:P-0004138-T02-IM6	prad_cdk12_mskcc_2020:P-0004138	0	NO	Prostate Cancer	Prostate Adenocarcinoma	0.5275	IMPACT468	MSKCC	Soft Tissue	MICROSATELLITE STABLE (MSS). See MSI note below.	0.94	Stable	3	PRAD	Prostate	Tumor	1	538	Metastasis	Male	Matched	2.59409	50	NA	NA	NA	NA	NA	NA	NA	NA	NA	NA	NA	NA	NA	NA	NA	NA	NA	NA	NA	NA	NA	NA	NA
prad_cdk12_mskcc_2020	P-0004243	P-0004243-T01-IM5	prad_cdk12_mskcc_2020:P-0004243-T01-IM5	prad_cdk12_mskcc_2020:P-0004243	0	NO	Prostate Cancer	Prostate Adenocarcinoma	0.3587	IMPACT410	MSKCC	Bone	NA	0.34	Stable	5	PRAD	Prostate	Tumor	1	358	Metastasis	Male	Matched	4.8936	70	NA	NA	NA	NA	NA	NA	NA	NA	NA	NA	NA	NA	NA	NA	NA	NA	NA	NA	NA	NA	NA	NA	NA
prad_cdk12_mskcc_2020	P-0004285	P-0004285-T01-IM5	prad_cdk12_mskcc_2020:P-0004285-T01-IM5	prad_cdk12_mskcc_2020:P-0004285	0	NO	Prostate Cancer	Prostate Adenocarcinoma	0	IMPACT410	MSKCC	Lymph Node	MICROSATELLITE STABLE (MSS). See MSI note below.	0	Stable	5	PRAD	Prostate	Tumor	1	471	Metastasis	Male	Matched	4.8936	60	NA	NA	NA	NA	NA	NA	NA	NA	NA	NA	NA	NA	NA	NA	NA	NA	NA	NA	NA	NA	NA	NA	NA
prad_cdk12_mskcc_2020	P-0004312	P-0004312-T01-IM5	prad_cdk12_mskcc_2020:P-0004312-T01-IM5	prad_cdk12_mskcc_2020:P-0004312	0	NO	Prostate Cancer	Prostate Adenocarcinoma	0.6094	IMPACT410	MSKCC	Bladder	NA	1.44	Stable	6	PRAD	Prostate	Tumor	1	388	Metastasis	Male	Matched	5.87232	40	NA	NA	NA	NA	NA	NA	NA	NA	NA	NA	NA	NA	NA	NA	NA	NA	NA	NA	NA	NA	NA	NA	NA
prad_cdk12_mskcc_2020	P-0004355	P-0004355-T01-IM5	prad_cdk12_mskcc_2020:P-0004355-T01-IM5	prad_cdk12_mskcc_2020:P-0004355	0	NO	Prostate Cancer	Prostate Adenocarcinoma	0.1681	IMPACT410	MSKCC	Pelvis	NA	0.17	Stable	3	PRAD	Prostate	Tumor	1	277	Metastasis	Male	Matched	2.93616	40	NA	NA	NA	NA	NA	NA	NA	NA	NA	NA	NA	NA	NA	NA	NA	NA	NA	NA	NA	NA	NA	NA	NA
prad_cdk12_mskcc_2020	P-0004389	P-0004389-T01-IM5	prad_cdk12_mskcc_2020:P-0004389-T01-IM5	prad_cdk12_mskcc_2020:P-0004389	0	NO	Prostate Cancer	Prostate Adenocarcinoma	0.0018	IMPACT410	MSKCC	Bone	NA	0.08	Stable	1	PRAD	Prostate	Tumor	1	508	Metastasis	Male	Matched	0.97872	60	NA	NA	NA	NA	NA	NA	NA	NA	NA	NA	NA	NA	NA	NA	NA	NA	NA	NA	NA	NA	NA	NA	NA
prad_cdk12_mskcc_2020	P-0004482	P-0004482-T01-IM5	prad_cdk12_mskcc_2020:P-0004482-T01-IM5	prad_cdk12_mskcc_2020:P-0004482	0	NO	Prostate Cancer	Prostate Adenocarcinoma	0.0941	IMPACT410	MSKCC	Liver	NA	0.42	Stable	1	PRAD	Prostate	Tumor	1	696	Metastasis	Male	Matched	0.97872	60	NA	NA	NA	NA	NA	NA	NA	NA	NA	NA	NA	NA	NA	NA	NA	NA	NA	NA	NA	NA	NA	NA	NA
prad_cdk12_mskcc_2020	P-0004489	P-0004489-T01-IM5	prad_cdk12_mskcc_2020:P-0004489-T01-IM5	prad_cdk12_mskcc_2020:P-0004489	0	NO	Prostate Cancer	Prostate Adenocarcinoma	0.3805	IMPACT410	MSKCC	Retroperitoneum	NA	0.06	Stable	5	PRAD	Prostate	Tumor	1	484	Metastasis	Male	Matched	4.8936	40	NA	NA	NA	NA	NA	NA	NA	NA	NA	NA	NA	NA	NA	NA	NA	NA	NA	NA	NA	NA	NA	NA	NA
prad_cdk12_mskcc_2020	P-0004593	P-0004593-T01-IM5	prad_cdk12_mskcc_2020:P-0004593-T01-IM5	prad_cdk12_mskcc_2020:P-0004593	0	NO	Prostate Cancer	Prostate Adenocarcinoma	0.4526	IMPACT410	MSKCC	Lymph Node	MICROSATELLITE STABLE (MSS). See MSI note below.	1.01	Stable	10	PRAD	Prostate	Tumor	1	230	Metastasis	Male	Matched	9.7872	50	NA	NA	NA	NA	NA	NA	NA	NA	NA	NA	NA	NA	NA	NA	NA	NA	NA	NA	NA	NA	NA	NA	NA
prad_cdk12_mskcc_2020	P-0004600	P-0004600-T01-IM5	prad_cdk12_mskcc_2020:P-0004600-T01-IM5	prad_cdk12_mskcc_2020:P-0004600	0	NO	Prostate Cancer	Prostate Adenocarcinoma	0.6486	IMPACT410	MSKCC	Bone	NA	2.84	Stable	5	PRAD	Prostate	Tumor	1	1047	Metastasis	Male	Matched	4.8936	40	NA	NA	NA	NA	NA	NA	NA	NA	NA	NA	NA	NA	NA	NA	NA	NA	NA	NA	NA	NA	NA	NA	NA
prad_cdk12_mskcc_2020	P-0004704	P-0004704-T01-IM5	prad_cdk12_mskcc_2020:P-0004704-T01-IM5	prad_cdk12_mskcc_2020:P-0004704	0	NO	Prostate Cancer	Prostate Adenocarcinoma	0.1668	IMPACT410	MSKCC	Bone	NA	0.81	Stable	4	PRAD	Prostate	Tumor	1	433	Metastasis	Male	Matched	3.91488	40	NA	NA	NA	NA	NA	NA	NA	NA	NA	NA	NA	NA	NA	NA	NA	NA	NA	NA	NA	NA	NA	NA	NA
prad_cdk12_mskcc_2020	P-0004830	P-0004830-T01-IM5	prad_cdk12_mskcc_2020:P-0004830-T01-IM5	prad_cdk12_mskcc_2020:P-0004830	0	NO	Prostate Cancer	Prostate Adenocarcinoma	0.3858	IMPACT410	MSKCC	Lymph Node	MICROSATELLITE STABLE (MSS). See MSI note below.	1.33	Stable	3	PRAD	Prostate	Tumor	1	412	Metastasis	Male	Matched	2.93616	50	NA	NA	NA	NA	NA	NA	NA	NA	NA	NA	NA	NA	NA	NA	NA	NA	NA	NA	NA	NA	NA	NA	NA
prad_cdk12_mskcc_2020	P-0004892	P-0004892-T01-IM5	prad_cdk12_mskcc_2020:P-0004892-T01-IM5	prad_cdk12_mskcc_2020:P-0004892	0	NO	Prostate Cancer	Prostate Adenocarcinoma	0.1608	IMPACT410	MSKCC	Lung	NA	0.07	Stable	12	PRAD	Prostate	Tumor	1	904	Metastasis	Male	Matched	11.7446	40	NA	NA	NA	NA	NA	NA	NA	NA	NA	NA	NA	NA	NA	NA	NA	NA	NA	NA	NA	NA	NA	NA	NA
prad_cdk12_mskcc_2020	P-0005014	P-0005014-T01-IM5	prad_cdk12_mskcc_2020:P-0005014-T01-IM5	prad_cdk12_mskcc_2020:P-0005014	0	NO	Prostate Cancer	Prostate Adenocarcinoma	0.2337	IMPACT410	MSKCC	Lymph Node	NA	1.45	Stable	3	PRAD	Prostate	Tumor	1	759	Metastasis	Male	Matched	2.93616	60	NA	NA	NA	NA	NA	NA	NA	NA	NA	NA	NA	NA	NA	NA	NA	NA	NA	NA	NA	NA	NA	NA	NA
prad_cdk12_mskcc_2020	P-0005045	P-0005045-T01-IM5	prad_cdk12_mskcc_2020:P-0005045-T01-IM5	prad_cdk12_mskcc_2020:P-0005045	0	NO	Prostate Cancer	Prostate Adenocarcinoma	0.1616	IMPACT410	MSKCC	Lymph Node	MICROSATELLITE STABLE (MSS). See MSI note below.	2	Stable	1	PRAD	Prostate	Tumor	1	412	Metastasis	Male	Matched	0.97872	70	NA	NA	NA	NA	NA	NA	NA	NA	NA	NA	NA	NA	NA	NA	NA	NA	NA	NA	NA	NA	NA	NA	NA
prad_cdk12_mskcc_2020	P-0005047	P-0005047-T01-IM5	prad_cdk12_mskcc_2020:P-0005047-T01-IM5	prad_cdk12_mskcc_2020:P-0005047	0	NO	Prostate Cancer	Prostate Adenocarcinoma	0.3048	IMPACT410	MSKCC	Lymph Node	NA	0.56	Stable	4	PRAD	Prostate	Tumor	1	856	Metastasis	Male	Matched	3.91488	30	NA	NA	NA	NA	NA	NA	NA	NA	NA	NA	NA	NA	NA	NA	NA	NA	NA	NA	NA	NA	NA	NA	NA
prad_cdk12_mskcc_2020	P-0005050	P-0005050-T01-IM5	prad_cdk12_mskcc_2020:P-0005050-T01-IM5	prad_cdk12_mskcc_2020:P-0005050	0	NO	Prostate Cancer	Prostate Adenocarcinoma	0.1777	IMPACT410	MSKCC	Lymph Node	NA	1.06	Stable	3	PRAD	Prostate	Tumor	1	802	Metastasis	Male	Matched	2.93616	80	NA	NA	NA	NA	NA	NA	NA	NA	NA	NA	NA	NA	NA	NA	NA	NA	NA	NA	NA	NA	NA	NA	NA
prad_cdk12_mskcc_2020	P-0005052	P-0005052-T02-IM5	prad_cdk12_mskcc_2020:P-0005052-T02-IM5	prad_cdk12_mskcc_2020:P-0005052	0	NO	Prostate Cancer	Prostate Adenocarcinoma	0.0117	IMPACT410	MSKCC	Liver	MICROSATELLITE STABLE (MSS). See MSI note below.	0.1	Stable	NA	PRAD	Prostate	Tumor	1	344	Metastasis	Male	Matched	0	70	NA	NA	NA	NA	NA	NA	NA	NA	NA	NA	NA	NA	NA	NA	NA	NA	NA	NA	NA	NA	NA	NA	NA
prad_cdk12_mskcc_2020	P-0005111	P-0005111-T01-IM5	prad_cdk12_mskcc_2020:P-0005111-T01-IM5	prad_cdk12_mskcc_2020:P-0005111	0	NO	Prostate Cancer	Prostate Adenocarcinoma	0.0038	IMPACT410	MSKCC	Lymph Node	NA	2.15	Stable	5	PRAD	Prostate	Tumor	1	566	Metastasis	Male	Matched	4.8936	30	NA	NA	NA	NA	NA	NA	NA	NA	NA	NA	NA	NA	NA	NA	NA	NA	NA	NA	NA	NA	NA	NA	NA
prad_cdk12_mskcc_2020	P-0005147	P-0005147-T01-IM5	prad_cdk12_mskcc_2020:P-0005147-T01-IM5	prad_cdk12_mskcc_2020:P-0005147	0	NO	Prostate Cancer	Prostate Adenocarcinoma	0.0354	IMPACT410	MSKCC	Lymph Node	NA	0	Stable	2	PRAD	Prostate	Tumor	1	512	Metastasis	Male	Matched	1.95744	60	NA	NA	NA	NA	NA	NA	NA	NA	NA	NA	NA	NA	NA	NA	NA	NA	NA	NA	NA	NA	NA	NA	NA
prad_cdk12_mskcc_2020	P-0005216	P-0005216-T01-IM5	prad_cdk12_mskcc_2020:P-0005216-T01-IM5	prad_cdk12_mskcc_2020:P-0005216	0	NO	Prostate Cancer	Prostate Adenocarcinoma	0.5171	IMPACT410	MSKCC	Lung	NA	2.33	Stable	7	PRAD	Prostate	Tumor	1	870	Metastasis	Male	Matched	6.85104	10	NA	NA	NA	NA	NA	NA	NA	NA	NA	NA	NA	NA	NA	NA	NA	NA	NA	NA	NA	NA	NA	NA	NA
prad_cdk12_mskcc_2020	P-0005344	P-0005344-T01-IM5	prad_cdk12_mskcc_2020:P-0005344-T01-IM5	prad_cdk12_mskcc_2020:P-0005344	0	NO	Prostate Cancer	Prostate Adenocarcinoma	0.2371	IMPACT410	MSKCC	Lymph Node	MICROSATELLITE STABLE (MSS). See MSI note below.	0.75	Stable	3	PRAD	Prostate	Tumor	1	607	Metastasis	Male	Matched	2.93616	60	NA	NA	NA	NA	NA	NA	NA	NA	NA	NA	NA	NA	NA	NA	NA	NA	NA	NA	NA	NA	NA	NA	NA
prad_cdk12_mskcc_2020	P-0005374	P-0005374-T01-IM5	prad_cdk12_mskcc_2020:P-0005374-T01-IM5	prad_cdk12_mskcc_2020:P-0005374	0	NO	Prostate Cancer	Prostate Adenocarcinoma	0.3435	IMPACT410	MSKCC	Retroperitoneum	MICROSATELLITE STABLE (MSS). See MSI note below.	1.97	Stable	5	PRAD	Prostate	Tumor	1	2148	Metastasis	Male	Matched	4.8936	60	NA	NA	NA	NA	NA	NA	NA	NA	NA	NA	NA	NA	NA	NA	NA	NA	NA	NA	NA	NA	NA	NA	NA
prad_cdk12_mskcc_2020	P-0005428	P-0005428-T01-IM5	prad_cdk12_mskcc_2020:P-0005428-T01-IM5	prad_cdk12_mskcc_2020:P-0005428	0	NO	Prostate Cancer	Prostate Adenocarcinoma	0.2938	IMPACT410	MSKCC	Lymph Node	NA	0.59	Stable	5	PRAD	Prostate	Tumor	1	542	Metastasis	Male	Matched	4.8936	40	NA	NA	NA	NA	NA	NA	NA	NA	NA	NA	NA	NA	NA	NA	NA	NA	NA	NA	NA	NA	NA	NA	NA
prad_cdk12_mskcc_2020	P-0005436	P-0005436-T02-IM5	prad_cdk12_mskcc_2020:P-0005436-T02-IM5	prad_cdk12_mskcc_2020:P-0005436	0	NO	Prostate Cancer	Prostate Adenocarcinoma	0.1117	IMPACT410	MSKCC	Bone	NA	0.23	Stable	3	PRAD	Prostate	Tumor	1	1079	Metastasis	Male	Matched	2.93616	80	NA	NA	NA	NA	NA	NA	NA	NA	NA	NA	NA	NA	NA	NA	NA	NA	NA	NA	NA	NA	NA	NA	NA
prad_cdk12_mskcc_2020	P-0005445	P-0005445-T03-IM6	prad_cdk12_mskcc_2020:P-0005445-T03-IM6	prad_cdk12_mskcc_2020:P-0005445	0	NO	Prostate Cancer	Prostate Adenocarcinoma	0.1226	IMPACT468	MSKCC	Lymph Node	NA	0.21	Do not report	3	PRAD	Prostate	Tumor	1	1050	Metastasis	Male	Matched	2.59409	60	NA	NA	NA	NA	NA	NA	NA	NA	NA	NA	NA	NA	NA	NA	NA	NA	NA	NA	NA	NA	NA	NA	NA
prad_cdk12_mskcc_2020	P-0005454	P-0005454-T02-IM5	prad_cdk12_mskcc_2020:P-0005454-T02-IM5	prad_cdk12_mskcc_2020:P-0005454	0	NO	Prostate Cancer	Prostate Adenocarcinoma	0.4525	IMPACT410	MSKCC	Lymph Node	NA	1.47	Stable	5	PRAD	Prostate	Tumor	1	1053	Metastasis	Male	Matched	4.8936	80	NA	NA	NA	NA	NA	NA	NA	NA	NA	NA	NA	NA	NA	NA	NA	NA	NA	NA	NA	NA	NA	NA	NA
prad_cdk12_mskcc_2020	P-0005459	P-0005459-T01-IM5	prad_cdk12_mskcc_2020:P-0005459-T01-IM5	prad_cdk12_mskcc_2020:P-0005459	0	NO	Prostate Cancer	Prostate Adenocarcinoma	0.3322	IMPACT410	MSKCC	Bladder	NA	0.58	Stable	5	PRAD	Prostate	Tumor	1	907	Metastasis	Male	Matched	3.91488	60	NA	NA	NA	NA	NA	NA	NA	NA	NA	NA	NA	NA	NA	NA	NA	NA	NA	NA	NA	NA	NA	NA	NA
prad_cdk12_mskcc_2020	P-0005546	P-0005546-T01-IM5	prad_cdk12_mskcc_2020:P-0005546-T01-IM5	prad_cdk12_mskcc_2020:P-0005546	0	NO	Prostate Cancer	Prostate Adenocarcinoma	0.1148	IMPACT410	MSKCC	Bone	NA	0.17	Stable	2	PRAD	Prostate	Tumor	1	861	Metastasis	Male	Matched	1.95744	20	NA	NA	NA	NA	NA	NA	NA	NA	NA	NA	NA	NA	NA	NA	NA	NA	NA	NA	NA	NA	NA	NA	NA
prad_cdk12_mskcc_2020	P-0005555	P-0005555-T01-IM5	prad_cdk12_mskcc_2020:P-0005555-T01-IM5	prad_cdk12_mskcc_2020:P-0005555	0	NO	Prostate Cancer	Prostate Adenocarcinoma	0.6223	IMPACT410	MSKCC	Liver	MICROSATELLITE STABLE (MSS). See MSI note below.	1.1	Stable	4	PRAD	Prostate	Tumor	1	1119	Metastasis	Male	Matched	3.91488	60	NA	NA	NA	NA	NA	NA	NA	NA	NA	NA	NA	NA	NA	NA	NA	NA	NA	NA	NA	NA	NA	NA	NA
prad_cdk12_mskcc_2020	P-0005570	P-0005570-T01-IM5	prad_cdk12_mskcc_2020:P-0005570-T01-IM5	prad_cdk12_mskcc_2020:P-0005570	0	NO	Prostate Cancer	Prostate Adenocarcinoma	0.1246	IMPACT410	MSKCC	Lymph Node	NA	0.09	Stable	3	PRAD	Prostate	Tumor	1	529	Metastasis	Male	Matched	2.93616	40	NA	NA	NA	NA	NA	NA	NA	NA	NA	NA	NA	NA	NA	NA	NA	NA	NA	NA	NA	NA	NA	NA	NA
prad_cdk12_mskcc_2020	P-0005571	P-0005571-T01-IM5	prad_cdk12_mskcc_2020:P-0005571-T01-IM5	prad_cdk12_mskcc_2020:P-0005571	0	NO	Prostate Cancer	Prostate Adenocarcinoma	0.506	IMPACT410	MSKCC	Lymph Node	NA	0.18	Stable	1	PRAD	Prostate	Tumor	1	291	Metastasis	Male	Matched	0.97872	60	NA	NA	NA	NA	NA	NA	NA	NA	NA	NA	NA	NA	NA	NA	NA	NA	NA	NA	NA	NA	NA	NA	NA
prad_cdk12_mskcc_2020	P-0005596	P-0005596-T01-IM5	prad_cdk12_mskcc_2020:P-0005596-T01-IM5	prad_cdk12_mskcc_2020:P-0005596	0	NO	Prostate Cancer	Prostate Adenocarcinoma	0.4289	IMPACT410	MSKCC	Lymph Node	NA	0.95	Stable	NA	PRAD	Prostate	Tumor	1	937	Metastasis	Male	Matched	0	50	NA	NA	NA	NA	NA	NA	NA	NA	NA	NA	NA	NA	NA	NA	NA	NA	NA	NA	NA	NA	NA	NA	NA
prad_cdk12_mskcc_2020	P-0005636	P-0005636-T01-IM5	prad_cdk12_mskcc_2020:P-0005636-T01-IM5	prad_cdk12_mskcc_2020:P-0005636	0	NO	Prostate Cancer	Prostate Adenocarcinoma	0.0815	IMPACT410	MSKCC	Lymph Node	NA	0.61	Stable	4	PRAD	Prostate	Tumor	1	1073	Metastasis	Male	Matched	3.91488	40	NA	NA	NA	NA	NA	NA	NA	NA	NA	NA	NA	NA	NA	NA	NA	NA	NA	NA	NA	NA	NA	NA	NA
prad_cdk12_mskcc_2020	P-0005713	P-0005713-T01-IM5	prad_cdk12_mskcc_2020:P-0005713-T01-IM5	prad_cdk12_mskcc_2020:P-0005713	0	NO	Prostate Cancer	Prostate Adenocarcinoma	0.1993	IMPACT410	MSKCC	Lung	NA	0.24	Stable	4	PRAD	Prostate	Tumor	1	324	Metastasis	Male	Matched	3.91488	80	NA	NA	NA	NA	NA	NA	NA	NA	NA	NA	NA	NA	NA	NA	NA	NA	NA	NA	NA	NA	NA	NA	NA
prad_cdk12_mskcc_2020	P-0005756	P-0005756-T01-IM5	prad_cdk12_mskcc_2020:P-0005756-T01-IM5	prad_cdk12_mskcc_2020:P-0005756	0	NO	Prostate Cancer	Prostate Adenocarcinoma	0.4267	IMPACT410	MSKCC	Lymph Node	NA	2.62	Stable	3	PRAD	Prostate	Tumor	1	1188	Metastasis	Male	Matched	2.93616	NA	NA	NA	NA	NA	NA	NA	NA	NA	NA	NA	NA	NA	NA	NA	NA	NA	NA	NA	NA	NA	NA	NA	NA
prad_cdk12_mskcc_2020	P-0005761	P-0005761-T01-IM5	prad_cdk12_mskcc_2020:P-0005761-T01-IM5	prad_cdk12_mskcc_2020:P-0005761	0	NO	Prostate Cancer	Prostate Adenocarcinoma	0.0104	IMPACT410	MSKCC	Liver	NA	0	Stable	5	PRAD	Prostate	Tumor	1	936	Metastasis	Male	Matched	4.8936	20	NA	NA	NA	NA	NA	NA	NA	NA	NA	NA	NA	NA	NA	NA	NA	NA	NA	NA	NA	NA	NA	NA	NA
prad_cdk12_mskcc_2020	P-0005768	P-0005768-T02-IM5	prad_cdk12_mskcc_2020:P-0005768-T02-IM5	prad_cdk12_mskcc_2020:P-0005768	0	NO	Prostate Cancer	Prostate Adenocarcinoma	0.1909	IMPACT410	MSKCC	Lymph Node	MICROSATELLITE STABLE (MSS). See MSI note below.	1	Stable	3	PRAD	Prostate	Tumor	1	527	Metastasis	Male	Matched	2.93616	70	NA	NA	NA	NA	NA	NA	NA	NA	NA	NA	NA	NA	NA	NA	NA	NA	NA	NA	NA	NA	NA	NA	NA
prad_cdk12_mskcc_2020	P-0005771	P-0005771-T02-IM5	prad_cdk12_mskcc_2020:P-0005771-T02-IM5	prad_cdk12_mskcc_2020:P-0005771	0	NO	Prostate Cancer	Prostate Adenocarcinoma	0.2332	IMPACT410	MSKCC	Lymph Node	MICROSATELLITE STABLE (MSS). See MSI note below.	0.62	Stable	3	PRAD	Prostate	Tumor	1	548	Metastasis	Male	Matched	2.93616	50	NA	NA	NA	NA	NA	NA	NA	NA	NA	NA	NA	NA	NA	NA	NA	NA	NA	NA	NA	NA	NA	NA	NA
prad_cdk12_mskcc_2020	P-0005787	P-0005787-T01-IM5	prad_cdk12_mskcc_2020:P-0005787-T01-IM5	prad_cdk12_mskcc_2020:P-0005787	0	NO	Prostate Cancer	Prostate Adenocarcinoma	0.1929	IMPACT410	MSKCC	Lung	MICROSATELLITE STABLE (MSS). See MSI note below.	0.14	Stable	3	PRAD	Prostate	Tumor	1	735	Metastasis	Male	Matched	2.93616	80	NA	NA	NA	NA	NA	NA	NA	NA	NA	NA	NA	NA	NA	NA	NA	NA	NA	NA	NA	NA	NA	NA	NA
prad_cdk12_mskcc_2020	P-0005806	P-0005806-T01-IM5	prad_cdk12_mskcc_2020:P-0005806-T01-IM5	prad_cdk12_mskcc_2020:P-0005806	0	NO	Prostate Cancer	Prostate Adenocarcinoma	0.4069	IMPACT410	MSKCC	Bone	NA	0.88	Stable	2	PRAD	Prostate	Tumor	1	484	Metastasis	Male	Matched	1.95744	50	NA	NA	NA	NA	NA	NA	NA	NA	NA	NA	NA	NA	NA	NA	NA	NA	NA	NA	NA	NA	NA	NA	NA
prad_cdk12_mskcc_2020	P-0005810	P-0005810-T01-IM5	prad_cdk12_mskcc_2020:P-0005810-T01-IM5	prad_cdk12_mskcc_2020:P-0005810	0	NO	Prostate Cancer	Prostate Adenocarcinoma	0.0978	IMPACT410	MSKCC	Lymph Node	NA	0.14	Stable	2	PRAD	Prostate	Tumor	1	974	Metastasis	Male	Matched	1.95744	30	NA	NA	NA	NA	NA	NA	NA	NA	NA	NA	NA	NA	NA	NA	NA	NA	NA	NA	NA	NA	NA	NA	NA
prad_cdk12_mskcc_2020	P-0005811	P-0005811-T01-IM5	prad_cdk12_mskcc_2020:P-0005811-T01-IM5	prad_cdk12_mskcc_2020:P-0005811	0	NO	Prostate Cancer	Prostate Adenocarcinoma	0.2094	IMPACT410	MSKCC	Lymph Node	NA	0.27	Stable	2	PRAD	Prostate	Tumor	1	1069	Metastasis	Male	Matched	1.95744	80	NA	NA	NA	NA	NA	NA	NA	NA	NA	NA	NA	NA	NA	NA	NA	NA	NA	NA	NA	NA	NA	NA	NA
prad_cdk12_mskcc_2020	P-0005867	P-0005867-T01-IM5	prad_cdk12_mskcc_2020:P-0005867-T01-IM5	prad_cdk12_mskcc_2020:P-0005867	0	NO	Prostate Cancer	Prostate Adenocarcinoma	0.1026	IMPACT410	MSKCC	Lymph Node	NA	0.26	Stable	7	PRAD	Prostate	Tumor	1	843	Metastasis	Male	Matched	6.85104	20	NA	NA	NA	NA	NA	NA	NA	NA	NA	NA	NA	NA	NA	NA	NA	NA	NA	NA	NA	NA	NA	NA	NA
prad_cdk12_mskcc_2020	P-0005890	P-0005890-T01-IM5	prad_cdk12_mskcc_2020:P-0005890-T01-IM5	prad_cdk12_mskcc_2020:P-0005890	0	NO	Prostate Cancer	Prostate Adenocarcinoma	0.0171	IMPACT410	MSKCC	Bone	NA	0	Stable	1	PRAD	Prostate	Tumor	1	723	Metastasis	Male	Matched	0.97872	20	NA	NA	NA	NA	NA	NA	NA	NA	NA	NA	NA	NA	NA	NA	NA	NA	NA	NA	NA	NA	NA	NA	NA
prad_cdk12_mskcc_2020	P-0005933	P-0005933-T01-IM5	prad_cdk12_mskcc_2020:P-0005933-T01-IM5	prad_cdk12_mskcc_2020:P-0005933	0	NO	Prostate Cancer	Prostate Adenocarcinoma	0.3343	IMPACT410	MSKCC	Lymph Node	NA	0.43	Stable	1	PRAD	Prostate	Tumor	1	836	Metastasis	Male	Matched	0.97872	70	NA	NA	NA	NA	NA	NA	NA	NA	NA	NA	NA	NA	NA	NA	NA	NA	NA	NA	NA	NA	NA	NA	NA
prad_cdk12_mskcc_2020	P-0005953	P-0005953-T01-IM5	prad_cdk12_mskcc_2020:P-0005953-T01-IM5	prad_cdk12_mskcc_2020:P-0005953	0	NO	Prostate Cancer	Prostate Adenocarcinoma	0.2378	IMPACT410	MSKCC	Lymph Node	NA	1.63	Stable	2	PRAD	Prostate	Tumor	1	982	Metastasis	Male	Matched	1.95744	70	NA	NA	NA	NA	NA	NA	NA	NA	NA	NA	NA	NA	NA	NA	NA	NA	NA	NA	NA	NA	NA	NA	NA
prad_cdk12_mskcc_2020	P-0005970	P-0005970-T02-IM5	prad_cdk12_mskcc_2020:P-0005970-T02-IM5	prad_cdk12_mskcc_2020:P-0005970	0	NO	Prostate Cancer	Prostate Adenocarcinoma	0.45	IMPACT410	MSKCC	Brain	NA	0.82	Stable	3	PRAD	Prostate	Tumor	1	855	Metastasis	Male	Matched	2.93616	90	NA	NA	NA	NA	NA	NA	NA	NA	NA	NA	NA	NA	NA	NA	NA	NA	NA	NA	NA	NA	NA	NA	NA
prad_cdk12_mskcc_2020	P-0005976	P-0005976-T01-IM5	prad_cdk12_mskcc_2020:P-0005976-T01-IM5	prad_cdk12_mskcc_2020:P-0005976	0	NO	Prostate Cancer	Prostate Adenocarcinoma	0.6983	IMPACT410	MSKCC	Liver	NA	3.53	Indeterminate	4	PRAD	Prostate	Tumor	1	1409	Metastasis	Male	Matched	3.91488	80	NA	NA	NA	NA	NA	NA	NA	NA	NA	NA	NA	NA	NA	NA	NA	NA	NA	NA	NA	NA	NA	NA	NA
prad_cdk12_mskcc_2020	P-0006029	P-0006029-T01-IM5	prad_cdk12_mskcc_2020:P-0006029-T01-IM5	prad_cdk12_mskcc_2020:P-0006029	0	NO	Prostate Cancer	Prostate Adenocarcinoma	0.0035	IMPACT410	MSKCC	Bone	NA	0.09	Stable	7	PRAD	Prostate	Tumor	1	713	Metastasis	Male	Matched	6.85104	60	NA	NA	NA	NA	NA	NA	NA	NA	NA	NA	NA	NA	NA	NA	NA	NA	NA	NA	NA	NA	NA	NA	NA
prad_cdk12_mskcc_2020	P-0006099	P-0006099-T01-IM5	prad_cdk12_mskcc_2020:P-0006099-T01-IM5	prad_cdk12_mskcc_2020:P-0006099	0	NO	Prostate Cancer	Prostate Adenocarcinoma	0	IMPACT410	MSKCC	Lymph Node	MICROSATELLITE STABLE (MSS). See MSI note below.	0	Stable	NA	PRAD	Prostate	Tumor	1	818	Metastasis	Male	Matched	0	10	NA	NA	NA	NA	NA	NA	NA	NA	NA	NA	NA	NA	NA	NA	NA	NA	NA	NA	NA	NA	NA	NA	NA
prad_cdk12_mskcc_2020	P-0006108	P-0006108-T01-IM5	prad_cdk12_mskcc_2020:P-0006108-T01-IM5	prad_cdk12_mskcc_2020:P-0006108	0	NO	Prostate Cancer	Prostate Adenocarcinoma	0.1474	IMPACT410	MSKCC	Lymph Node	NA	0.15	Stable	3	PRAD	Prostate	Tumor	1	954	Metastasis	Male	Matched	2.93616	30	NA	NA	NA	NA	NA	NA	NA	NA	NA	NA	NA	NA	NA	NA	NA	NA	NA	NA	NA	NA	NA	NA	NA
prad_cdk12_mskcc_2020	P-0006128	P-0006128-T01-IM5	prad_cdk12_mskcc_2020:P-0006128-T01-IM5	prad_cdk12_mskcc_2020:P-0006128	0	NO	Prostate Cancer	Prostate Adenocarcinoma	0.0393	IMPACT410	MSKCC	Lymph Node	NA	0.14	Stable	2	PRAD	Prostate	Tumor	1	996	Metastasis	Male	Matched	1.95744	20	NA	NA	NA	NA	NA	NA	NA	NA	NA	NA	NA	NA	NA	NA	NA	NA	NA	NA	NA	NA	NA	NA	NA
prad_cdk12_mskcc_2020	P-0006231	P-0006231-T01-IM5	prad_cdk12_mskcc_2020:P-0006231-T01-IM5	prad_cdk12_mskcc_2020:P-0006231	0	NO	Prostate Cancer	Prostate Adenocarcinoma	0.0907	IMPACT410	MSKCC	Soft Tissue	MICROSATELLITE STABLE (MSS). See MSI note below.	0.4	Stable	5	PRAD	Prostate	Tumor	1	1089	Metastasis	Male	Matched	4.8936	20	NA	NA	NA	NA	NA	NA	NA	NA	NA	NA	NA	NA	NA	NA	NA	NA	NA	NA	NA	NA	NA	NA	NA
prad_cdk12_mskcc_2020	P-0006461	P-0006461-T01-IM5	prad_cdk12_mskcc_2020:P-0006461-T01-IM5	prad_cdk12_mskcc_2020:P-0006461	0	NO	Prostate Cancer	Prostate Adenocarcinoma	0.2022	IMPACT410	MSKCC	Bone	NA	0.08	Stable	9	PRAD	Prostate	Tumor	1	799	Metastasis	Male	Matched	8.80848	30	NA	NA	NA	NA	NA	NA	NA	NA	NA	NA	NA	NA	NA	NA	NA	NA	NA	NA	NA	NA	NA	NA	NA
prad_cdk12_mskcc_2020	P-0006584	P-0006584-T01-IM5	prad_cdk12_mskcc_2020:P-0006584-T01-IM5	prad_cdk12_mskcc_2020:P-0006584	0	NO	Prostate Cancer	Prostate Adenocarcinoma	0.1682	IMPACT410	MSKCC	Bone	MICROSATELLITE STABLE (MSS). See MSI note below.	0.53	Stable	3	PRAD	Prostate	Tumor	1	618	Metastasis	Male	Matched	2.93616	10	NA	NA	NA	NA	NA	NA	NA	NA	NA	NA	NA	NA	NA	NA	NA	NA	NA	NA	NA	NA	NA	NA	NA
prad_cdk12_mskcc_2020	P-0006602	P-0006602-T03-IM6	prad_cdk12_mskcc_2020:P-0006602-T03-IM6	prad_cdk12_mskcc_2020:P-0006602	0	NO	Prostate Cancer	Prostate Adenocarcinoma	0.336	IMPACT468	MSKCC	Pelvis	MICROSATELLITE STABLE (MSS). See MSI note below.	0.58	Stable	5	PRAD	Prostate	Tumor	1	545	Metastasis	Male	Matched	4.32349	50	NA	NA	NA	NA	NA	NA	NA	NA	NA	NA	NA	NA	NA	NA	NA	NA	NA	NA	NA	NA	NA	NA	NA
prad_cdk12_mskcc_2020	P-0006603	P-0006603-T01-IM5	prad_cdk12_mskcc_2020:P-0006603-T01-IM5	prad_cdk12_mskcc_2020:P-0006603	0	NO	Prostate Cancer	Prostate Adenocarcinoma	0.4375	IMPACT410	MSKCC	Lymph Node	MICROSATELLITE STABLE (MSS). See MSI note below.	3	Stable	1	PRAD	Prostate	Tumor	1	658	Metastasis	Male	Matched	0.97872	NA	NA	NA	NA	NA	NA	NA	NA	NA	NA	NA	NA	NA	NA	NA	NA	NA	NA	NA	NA	NA	NA	NA	NA
prad_cdk12_mskcc_2020	P-0006670	P-0006670-T01-IM5	prad_cdk12_mskcc_2020:P-0006670-T01-IM5	prad_cdk12_mskcc_2020:P-0006670	0	NO	Prostate Cancer	Prostate Adenocarcinoma	0.3981	IMPACT410	MSKCC	Bone	MICROSATELLITE STABLE (MSS). See MSI note below.	1.5	Stable	1	PRAD	Prostate	Tumor	1	395	Metastasis	Male	Matched	0.97872	60	NA	NA	NA	NA	NA	NA	NA	NA	NA	NA	NA	NA	NA	NA	NA	NA	NA	NA	NA	NA	NA	NA	NA
prad_cdk12_mskcc_2020	P-0006692	P-0006692-T01-IM5	prad_cdk12_mskcc_2020:P-0006692-T01-IM5	prad_cdk12_mskcc_2020:P-0006692	0	NO	Prostate Cancer	Prostate Adenocarcinoma	0.6225	IMPACT410	MSKCC	Mediastinum	NA	0.88	Stable	6	PRAD	Prostate	Tumor	1	831	Metastasis	Male	Matched	5.87232	70	NA	NA	NA	NA	NA	NA	NA	NA	NA	NA	NA	NA	NA	NA	NA	NA	NA	NA	NA	NA	NA	NA	NA
prad_cdk12_mskcc_2020	P-0006749	P-0006749-T01-IM5	prad_cdk12_mskcc_2020:P-0006749-T01-IM5	prad_cdk12_mskcc_2020:P-0006749	0	NO	Prostate Cancer	Prostate Adenocarcinoma	0.2604	IMPACT410	MSKCC	Lung	NA	1.21	Stable	5	PRAD	Prostate	Tumor	1	672	Metastasis	Male	Matched	4.8936	10	NA	NA	NA	NA	NA	NA	NA	NA	NA	NA	NA	NA	NA	NA	NA	NA	NA	NA	NA	NA	NA	NA	NA
prad_cdk12_mskcc_2020	P-0006751	P-0006751-T01-IM5	prad_cdk12_mskcc_2020:P-0006751-T01-IM5	prad_cdk12_mskcc_2020:P-0006751	0	NO	Prostate Cancer	Prostate Adenocarcinoma	0.2454	IMPACT410	MSKCC	Epidural	MICROSATELLITE STABLE (MSS). See MSI note below.	0.28	Stable	1	PRAD	Prostate	Tumor	1	879	Metastasis	Male	Matched	0.97872	70	NA	NA	NA	NA	NA	NA	NA	NA	NA	NA	NA	NA	NA	NA	NA	NA	NA	NA	NA	NA	NA	NA	NA
prad_cdk12_mskcc_2020	P-0006806	P-0006806-T01-IM5	prad_cdk12_mskcc_2020:P-0006806-T01-IM5	prad_cdk12_mskcc_2020:P-0006806	0	NO	Prostate Cancer	Prostate Adenocarcinoma	0.5989	IMPACT410	MSKCC	Liver	MICROSATELLITE STABLE (MSS). See MSI note below.	1.49	Stable	3	PRAD	Prostate	Tumor	1	856	Metastasis	Male	Matched	2.93616	40	NA	NA	NA	NA	NA	NA	NA	NA	NA	NA	NA	NA	NA	NA	NA	NA	NA	NA	NA	NA	NA	NA	NA
prad_cdk12_mskcc_2020	P-0006837	P-0006837-T02-IM5	prad_cdk12_mskcc_2020:P-0006837-T02-IM5	prad_cdk12_mskcc_2020:P-0006837	0	NO	Prostate Cancer	Prostate Adenocarcinoma	0.1405	IMPACT410	MSKCC	Bone	NA	0.38	Stable	3	PRAD	Prostate	Tumor	1	1035	Metastasis	Male	Matched	2.93616	70	NA	NA	NA	NA	NA	NA	NA	NA	NA	NA	NA	NA	NA	NA	NA	NA	NA	NA	NA	NA	NA	NA	NA
prad_cdk12_mskcc_2020	P-0006840	P-0006840-T01-IM5	prad_cdk12_mskcc_2020:P-0006840-T01-IM5	prad_cdk12_mskcc_2020:P-0006840	0	NO	Prostate Cancer	Prostate Adenocarcinoma	0.3052	IMPACT410	MSKCC	Lymph Node	NA	0.85	Stable	9	PRAD	Prostate	Tumor	1	1001	Metastasis	Male	Matched	8.80848	20	NA	NA	NA	NA	NA	NA	NA	NA	NA	NA	NA	NA	NA	NA	NA	NA	NA	NA	NA	NA	NA	NA	NA
prad_cdk12_mskcc_2020	P-0006856	P-0006856-T02-IM5	prad_cdk12_mskcc_2020:P-0006856-T02-IM5	prad_cdk12_mskcc_2020:P-0006856	0	NO	Prostate Cancer	Prostate Adenocarcinoma	0.4762	IMPACT410	MSKCC	Liver	MICROSATELLITE STABLE (MSS). See MSI note below.	2.73	Stable	4	PRAD	Prostate	Tumor	1	1014	Metastasis	Male	Matched	3.91488	80	NA	NA	NA	NA	NA	NA	NA	NA	NA	NA	NA	NA	NA	NA	NA	NA	NA	NA	NA	NA	NA	NA	NA
prad_cdk12_mskcc_2020	P-0006905	P-0006905-T01-IM5	prad_cdk12_mskcc_2020:P-0006905-T01-IM5	prad_cdk12_mskcc_2020:P-0006905	0	NO	Prostate Cancer	Prostate Adenocarcinoma	0.5202	IMPACT410	MSKCC	Lymph Node	NA	2.89	Stable	6	PRAD	Prostate	Tumor	1	981	Metastasis	Male	Matched	5.87232	10	NA	NA	NA	NA	NA	NA	NA	NA	NA	NA	NA	NA	NA	NA	NA	NA	NA	NA	NA	NA	NA	NA	NA
prad_cdk12_mskcc_2020	P-0006931	P-0006931-T01-IM5	prad_cdk12_mskcc_2020:P-0006931-T01-IM5	prad_cdk12_mskcc_2020:P-0006931	0	NO	Prostate Cancer	Prostate Adenocarcinoma	0.0932	IMPACT410	MSKCC	Lymph Node	NA	0.07	Stable	1	PRAD	Prostate	Tumor	1	650	Metastasis	Male	Matched	0.97872	20	NA	NA	NA	NA	NA	NA	NA	NA	NA	NA	NA	NA	NA	NA	NA	NA	NA	NA	NA	NA	NA	NA	NA
prad_cdk12_mskcc_2020	P-0006994	P-0006994-T01-IM5	prad_cdk12_mskcc_2020:P-0006994-T01-IM5	prad_cdk12_mskcc_2020:P-0006994	0	NO	Prostate Cancer	Prostate Adenocarcinoma	0.4148	IMPACT410	MSKCC	Lymph Node	NA	0.57	Stable	4	PRAD	Prostate	Tumor	1	852	Metastasis	Male	Matched	3.91488	40	NA	NA	NA	NA	NA	NA	NA	NA	NA	NA	NA	NA	NA	NA	NA	NA	NA	NA	NA	NA	NA	NA	NA
prad_cdk12_mskcc_2020	P-0007006	P-0007006-T01-IM5	prad_cdk12_mskcc_2020:P-0007006-T01-IM5	prad_cdk12_mskcc_2020:P-0007006	0	NO	Prostate Cancer	Prostate Adenocarcinoma	0.1034	IMPACT410	MSKCC	Soft Tissue	NA	0.07	Stable	4	PRAD	Prostate	Tumor	1	578	Metastasis	Male	Matched	3.91488	20	NA	NA	NA	NA	NA	NA	NA	NA	NA	NA	NA	NA	NA	NA	NA	NA	NA	NA	NA	NA	NA	NA	NA
prad_cdk12_mskcc_2020	P-0007025	P-0007025-T01-IM5	prad_cdk12_mskcc_2020:P-0007025-T01-IM5	prad_cdk12_mskcc_2020:P-0007025	0	NO	Prostate Cancer	Prostate Adenocarcinoma	0.249	IMPACT410	MSKCC	Lymph Node	NA	0.3	Stable	2	PRAD	Prostate	Tumor	1	981	Metastasis	Male	Matched	1.95744	10	NA	NA	NA	NA	NA	NA	NA	NA	NA	NA	NA	NA	NA	NA	NA	NA	NA	NA	NA	NA	NA	NA	NA
prad_cdk12_mskcc_2020	P-0007043	P-0007043-T02-IM6	prad_cdk12_mskcc_2020:P-0007043-T02-IM6	prad_cdk12_mskcc_2020:P-0007043	0	NO	Prostate Cancer	Prostate Adenocarcinoma	0.1461	IMPACT468	MSKCC	Lymph node	MICROSATELLITE STABLE (MSS). See MSI note below.	0.45	Stable	3	PRAD	Prostate	Tumor	1	836	Metastasis	Male	Matched	2.59409	60	NA	NA	NA	NA	NA	NA	NA	NA	NA	NA	NA	NA	NA	NA	NA	NA	NA	NA	NA	NA	NA	NA	NA
prad_cdk12_mskcc_2020	P-0007137	P-0007137-T02-IM6	prad_cdk12_mskcc_2020:P-0007137-T02-IM6	prad_cdk12_mskcc_2020:P-0007137	0	NO	Prostate Cancer	Prostate Adenocarcinoma	0.0642	IMPACT468	MSKCC	Vertebrate	NA	0.32	Do not report	5	PRAD	Prostate	Tumor	1	758	Metastasis	Male	Matched	4.32349	30	NA	NA	NA	NA	NA	NA	NA	NA	NA	NA	NA	NA	NA	NA	NA	NA	NA	NA	NA	NA	NA	NA	NA
prad_cdk12_mskcc_2020	P-0007139	P-0007139-T01-IM5	prad_cdk12_mskcc_2020:P-0007139-T01-IM5	prad_cdk12_mskcc_2020:P-0007139	0	NO	Prostate Cancer	Prostate Adenocarcinoma	0.307	IMPACT410	MSKCC	Bladder	NA	0.51	Stable	2	PRAD	Prostate	Tumor	1	1049	Metastasis	Male	Matched	1.95744	70	NA	NA	NA	NA	NA	NA	NA	NA	NA	NA	NA	NA	NA	NA	NA	NA	NA	NA	NA	NA	NA	NA	NA
prad_cdk12_mskcc_2020	P-0007182	P-0007182-T01-IM5	prad_cdk12_mskcc_2020:P-0007182-T01-IM5	prad_cdk12_mskcc_2020:P-0007182	0	NO	Prostate Cancer	Prostate Adenocarcinoma	0.6109	IMPACT410	MSKCC	Spine	NA	0.97	Stable	3	PRAD	Prostate	Tumor	1	387	Metastasis	Male	Matched	2.93616	70	NA	NA	NA	NA	NA	NA	NA	NA	NA	NA	NA	NA	NA	NA	NA	NA	NA	NA	NA	NA	NA	NA	NA
prad_cdk12_mskcc_2020	P-0007219	P-0007219-T02-IM6	prad_cdk12_mskcc_2020:P-0007219-T02-IM6	prad_cdk12_mskcc_2020:P-0007219	0	NO	Prostate Cancer	Prostate Adenocarcinoma	0.4236	IMPACT468	MSKCC	Liver	NA	1.13	Do not report	1	PRAD	Prostate	Tumor	1	1015	Metastasis	Male	Matched	0.864698	50	NA	NA	NA	NA	NA	NA	NA	NA	NA	NA	NA	NA	NA	NA	NA	NA	NA	NA	NA	NA	NA	NA	NA
prad_cdk12_mskcc_2020	P-0007289	P-0007289-T02-IM5	prad_cdk12_mskcc_2020:P-0007289-T02-IM5	prad_cdk12_mskcc_2020:P-0007289	0	NO	Prostate Cancer	Prostate Adenocarcinoma	0.5668	IMPACT410	MSKCC	Bladder	MICROSATELLITE STABLE (MSS). See MSI note below.	1.84	Stable	5	PRAD	Prostate	Tumor	1	657	Metastasis	Male	Matched	4.8936	80	NA	NA	NA	NA	NA	NA	NA	NA	NA	NA	NA	NA	NA	NA	NA	NA	NA	NA	NA	NA	NA	NA	NA
prad_cdk12_mskcc_2020	P-0007307	P-0007307-T02-IM5	prad_cdk12_mskcc_2020:P-0007307-T02-IM5	prad_cdk12_mskcc_2020:P-0007307	0	NO	Prostate Cancer	Prostate Adenocarcinoma	0.3491	IMPACT410	MSKCC	Lymph Node	NA	1.11	Stable	3	PRAD	Prostate	Tumor	1	864	Metastasis	Male	Matched	2.93616	70	NA	NA	NA	NA	NA	NA	NA	NA	NA	NA	NA	NA	NA	NA	NA	NA	NA	NA	NA	NA	NA	NA	NA
prad_cdk12_mskcc_2020	P-0007343	P-0007343-T02-IM6	prad_cdk12_mskcc_2020:P-0007343-T02-IM6	prad_cdk12_mskcc_2020:P-0007343	0	NO	Prostate Cancer	Prostate Adenocarcinoma	0.7649	IMPACT468	MSKCC	Abdomen	MICROSATELLITE INSTABILITY-INDETERMINATE. See MSI note below.	3.42	Indeterminate	5	PRAD	Prostate	Tumor	1	1085	Metastasis	Male	Matched	4.32349	90	NA	NA	NA	NA	NA	NA	NA	NA	NA	NA	NA	NA	NA	NA	NA	NA	NA	NA	NA	NA	NA	NA	NA
prad_cdk12_mskcc_2020	P-0007402	P-0007402-T01-IM5	prad_cdk12_mskcc_2020:P-0007402-T01-IM5	prad_cdk12_mskcc_2020:P-0007402	0	NO	Prostate Cancer	Prostate Adenocarcinoma	0.192	IMPACT410	MSKCC	Lymph Node	NA	0.17	Stable	3	PRAD	Prostate	Tumor	1	763	Metastasis	Male	Matched	2.93616	25	NA	NA	NA	NA	NA	NA	NA	NA	NA	NA	NA	NA	NA	NA	NA	NA	NA	NA	NA	NA	NA	NA	NA
prad_cdk12_mskcc_2020	P-0007411	P-0007411-T02-IM5	prad_cdk12_mskcc_2020:P-0007411-T02-IM5	prad_cdk12_mskcc_2020:P-0007411	0	NO	Prostate Cancer	Prostate Adenocarcinoma	0.2297	IMPACT410	MSKCC	Lymph Node	NA	0.41	Stable	4	PRAD	Prostate	Tumor	1	854	Metastasis	Male	Matched	3.91488	40	NA	NA	NA	NA	NA	NA	NA	NA	NA	NA	NA	NA	NA	NA	NA	NA	NA	NA	NA	NA	NA	NA	NA
prad_cdk12_mskcc_2020	P-0007416	P-0007416-T01-IM5	prad_cdk12_mskcc_2020:P-0007416-T01-IM5	prad_cdk12_mskcc_2020:P-0007416	0	NO	Prostate Cancer	Prostate Adenocarcinoma	0.6236	IMPACT410	MSKCC	Bone	NA	2.88	Stable	2	PRAD	Prostate	Tumor	1	361	Metastasis	Male	Matched	1.95744	95	NA	NA	NA	NA	NA	NA	NA	NA	NA	NA	NA	NA	NA	NA	NA	NA	NA	NA	NA	NA	NA	NA	NA
prad_cdk12_mskcc_2020	P-0007515	P-0007515-T01-IM5	prad_cdk12_mskcc_2020:P-0007515-T01-IM5	prad_cdk12_mskcc_2020:P-0007515	0	NO	Prostate Cancer	Prostate Adenocarcinoma	0.5095	IMPACT410	MSKCC	Bone	NA	1.43	Stable	3	PRAD	Prostate	Tumor	1	924	Metastasis	Male	Matched	2.93616	95	NA	NA	NA	NA	NA	NA	NA	NA	NA	NA	NA	NA	NA	NA	NA	NA	NA	NA	NA	NA	NA	NA	NA
prad_cdk12_mskcc_2020	P-0007529	P-0007529-T01-IM5	prad_cdk12_mskcc_2020:P-0007529-T01-IM5	prad_cdk12_mskcc_2020:P-0007529	0	NO	Prostate Cancer	Prostate Adenocarcinoma	0.0001	IMPACT410	MSKCC	Lymph Node	NA	0.09	Stable	4	PRAD	Prostate	Tumor	1	721	Metastasis	Male	Matched	3.91488	40	NA	NA	NA	NA	NA	NA	NA	NA	NA	NA	NA	NA	NA	NA	NA	NA	NA	NA	NA	NA	NA	NA	NA
prad_cdk12_mskcc_2020	P-0007533	P-0007533-T01-IM5	prad_cdk12_mskcc_2020:P-0007533-T01-IM5	prad_cdk12_mskcc_2020:P-0007533	0	NO	Prostate Cancer	Prostate Adenocarcinoma	0.3178	IMPACT410	MSKCC	Liver	NA	1.22	Stable	3	PRAD	Prostate	Tumor	1	811	Metastasis	Male	Matched	2.93616	80	NA	NA	NA	NA	NA	NA	NA	NA	NA	NA	NA	NA	NA	NA	NA	NA	NA	NA	NA	NA	NA	NA	NA
prad_cdk12_mskcc_2020	P-0007547	P-0007547-T01-IM5	prad_cdk12_mskcc_2020:P-0007547-T01-IM5	prad_cdk12_mskcc_2020:P-0007547	0	NO	Prostate Cancer	Prostate Adenocarcinoma	0.3682	IMPACT410	MSKCC	Pleura	NA	0.62	Stable	1	PRAD	Prostate	Tumor	1	674	Metastasis	Male	Matched	0.97872	80	NA	NA	NA	NA	NA	NA	NA	NA	NA	NA	NA	NA	NA	NA	NA	NA	NA	NA	NA	NA	NA	NA	NA
prad_cdk12_mskcc_2020	P-0007629	P-0007629-T02-IM6	prad_cdk12_mskcc_2020:P-0007629-T02-IM6	prad_cdk12_mskcc_2020:P-0007629	0	NO	Prostate Cancer	Prostate Adenocarcinoma	0.5884	IMPACT468	MSKCC	Liver	MICROSATELLITE STABLE (MSS). See MSI note below.	0.47	Stable	5	PRAD	Prostate	Tumor	1	580	Metastasis	Male	Matched	4.32349	50	NA	NA	NA	NA	NA	NA	NA	NA	NA	NA	NA	NA	NA	NA	NA	NA	NA	NA	NA	NA	NA	NA	NA
prad_cdk12_mskcc_2020	P-0007734	P-0007734-T01-IM5	prad_cdk12_mskcc_2020:P-0007734-T01-IM5	prad_cdk12_mskcc_2020:P-0007734	0	NO	Prostate Cancer	Prostate Adenocarcinoma	0.4614	IMPACT410	MSKCC	Liver	NA	1.42	Stable	3	PRAD	Prostate	Tumor	1	131	Metastasis	Male	Matched	2.93616	80	NA	NA	NA	NA	NA	NA	NA	NA	NA	NA	NA	NA	NA	NA	NA	NA	NA	NA	NA	NA	NA	NA	NA
prad_cdk12_mskcc_2020	P-0007749	P-0007749-T01-IM5	prad_cdk12_mskcc_2020:P-0007749-T01-IM5	prad_cdk12_mskcc_2020:P-0007749	0	NO	Prostate Cancer	Prostate Adenocarcinoma	0.2429	IMPACT410	MSKCC	Omentum	NA	0.38	Stable	2	PRAD	Prostate	Tumor	1	884	Metastasis	Male	Matched	1.95744	40	NA	NA	NA	NA	NA	NA	NA	NA	NA	NA	NA	NA	NA	NA	NA	NA	NA	NA	NA	NA	NA	NA	NA
prad_cdk12_mskcc_2020	P-0007770	P-0007770-T01-IM5	prad_cdk12_mskcc_2020:P-0007770-T01-IM5	prad_cdk12_mskcc_2020:P-0007770	0	NO	Prostate Cancer	Prostate Adenocarcinoma	0.4534	IMPACT410	MSKCC	Lymph Node	MICROSATELLITE STABLE (MSS). See MSI note below.	1.62	Stable	NA	PRAD	Prostate	Tumor	1	1170	Metastasis	Male	Matched	0	60	NA	NA	NA	NA	NA	NA	NA	NA	NA	NA	NA	NA	NA	NA	NA	NA	NA	NA	NA	NA	NA	NA	NA
prad_cdk12_mskcc_2020	P-0007856	P-0007856-T01-IM5	prad_cdk12_mskcc_2020:P-0007856-T01-IM5	prad_cdk12_mskcc_2020:P-0007856	0	NO	Prostate Cancer	Prostate Adenocarcinoma	0.228	IMPACT410	MSKCC	Pelvic Nodule	MICROSATELLITE STABLE (MSS). See MSI note below.	0.22	Stable	3	PRAD	Prostate	Tumor	1	724	Metastasis	Male	Matched	2.93616	30	NA	NA	NA	NA	NA	NA	NA	NA	NA	NA	NA	NA	NA	NA	NA	NA	NA	NA	NA	NA	NA	NA	NA
prad_cdk12_mskcc_2020	P-0007875	P-0007875-T02-IM6	prad_cdk12_mskcc_2020:P-0007875-T02-IM6	prad_cdk12_mskcc_2020:P-0007875	0	NO	Prostate Cancer	Prostate Adenocarcinoma	0.3247	IMPACT468	MSKCC	Bone	MICROSATELLITE STABLE (MSS). See MSI note below.	0.05	Stable	6	PRAD	Prostate	Tumor	1	587	Metastasis	Male	Matched	5.18819	60	NA	NA	NA	NA	NA	NA	NA	NA	NA	NA	NA	NA	NA	NA	NA	NA	NA	NA	NA	NA	NA	NA	NA
prad_cdk12_mskcc_2020	P-0008048	P-0008048-T01-IM5	prad_cdk12_mskcc_2020:P-0008048-T01-IM5	prad_cdk12_mskcc_2020:P-0008048	0	NO	Prostate Cancer	Prostate Adenocarcinoma	0.0188	IMPACT410	MSKCC	Bone	NA	0	Stable	5	PRAD	Prostate	Tumor	1	918	Metastasis	Male	Matched	4.8936	20	NA	NA	NA	NA	NA	NA	NA	NA	NA	NA	NA	NA	NA	NA	NA	NA	NA	NA	NA	NA	NA	NA	NA
prad_cdk12_mskcc_2020	P-0008057	P-0008057-T01-IM5	prad_cdk12_mskcc_2020:P-0008057-T01-IM5	prad_cdk12_mskcc_2020:P-0008057	0	NO	Prostate Cancer	Prostate Adenocarcinoma	0.1888	IMPACT410	MSKCC	Skull	MICROSATELLITE STABLE (MSS). See MSI note below.	0.15	Stable	3	PRAD	Prostate	Tumor	1	846	Metastasis	Male	Matched	2.93616	25	NA	NA	NA	NA	NA	NA	NA	NA	NA	NA	NA	NA	NA	NA	NA	NA	NA	NA	NA	NA	NA	NA	NA
prad_cdk12_mskcc_2020	P-0008069	P-0008069-T02-IM5	prad_cdk12_mskcc_2020:P-0008069-T02-IM5	prad_cdk12_mskcc_2020:P-0008069	0	NO	Prostate Cancer	Prostate Adenocarcinoma	0.0321	IMPACT410	MSKCC	NA	NA	0.52	Stable	5	PRAD	Prostate	Tumor	1	1203	Metastasis	Male	Matched	4.8936	70	NA	NA	NA	NA	NA	NA	NA	NA	NA	NA	NA	NA	NA	NA	NA	NA	NA	NA	NA	NA	NA	NA	NA
prad_cdk12_mskcc_2020	P-0008074	P-0008074-T01-IM5	prad_cdk12_mskcc_2020:P-0008074-T01-IM5	prad_cdk12_mskcc_2020:P-0008074	0	NO	Prostate Cancer	Prostate Adenocarcinoma	0.1784	IMPACT410	MSKCC	Lymph Node	NA	0.33	Stable	2	PRAD	Prostate	Tumor	1	862	Metastasis	Male	Matched	1.95744	70	NA	NA	NA	NA	NA	NA	NA	NA	NA	NA	NA	NA	NA	NA	NA	NA	NA	NA	NA	NA	NA	NA	NA
prad_cdk12_mskcc_2020	P-0008077	P-0008077-T02-IM5	prad_cdk12_mskcc_2020:P-0008077-T02-IM5	prad_cdk12_mskcc_2020:P-0008077	0	NO	Prostate Cancer	Prostate Adenocarcinoma	0.1323	IMPACT410	MSKCC	Lung	NA	0.62	Stable	7	PRAD	Prostate	Tumor	1	303	Metastasis	Male	Matched	6.85104	65	NA	NA	NA	NA	NA	NA	NA	NA	NA	NA	NA	NA	NA	NA	NA	NA	NA	NA	NA	NA	NA	NA	NA
prad_cdk12_mskcc_2020	P-0008098	P-0008098-T01-IM5	prad_cdk12_mskcc_2020:P-0008098-T01-IM5	prad_cdk12_mskcc_2020:P-0008098	0	NO	Prostate Cancer	Prostate Adenocarcinoma	0.2853	IMPACT410	MSKCC	Bone	NA	0.47	Stable	5	PRAD	Prostate	Tumor	1	882	Metastasis	Male	Matched	4.8936	20	NA	NA	NA	NA	NA	NA	NA	NA	NA	NA	NA	NA	NA	NA	NA	NA	NA	NA	NA	NA	NA	NA	NA
prad_cdk12_mskcc_2020	P-0008206	P-0008206-T01-IM5	prad_cdk12_mskcc_2020:P-0008206-T01-IM5	prad_cdk12_mskcc_2020:P-0008206	0	NO	Prostate Cancer	Prostate Adenocarcinoma	0.6754	IMPACT410	MSKCC	Neck	NA	1.55	Stable	1	PRAD	Prostate	Tumor	1	1141	Metastasis	Male	Matched	0.97872	70	NA	NA	NA	NA	NA	NA	NA	NA	NA	NA	NA	NA	NA	NA	NA	NA	NA	NA	NA	NA	NA	NA	NA
prad_cdk12_mskcc_2020	P-0008294	P-0008294-T01-IM5	prad_cdk12_mskcc_2020:P-0008294-T01-IM5	prad_cdk12_mskcc_2020:P-0008294	0	NO	Prostate Cancer	Prostate Adenocarcinoma	0.0113	IMPACT410	MSKCC	Bone	MICROSATELLITE STABLE (MSS). See MSI note below.	0.09	Stable	NA	PRAD	Prostate	Tumor	1	523	Metastasis	Male	Matched	0	10	NA	NA	NA	NA	NA	NA	NA	NA	NA	NA	NA	NA	NA	NA	NA	NA	NA	NA	NA	NA	NA	NA	NA
prad_cdk12_mskcc_2020	P-0008301	P-0008301-T01-IM5	prad_cdk12_mskcc_2020:P-0008301-T01-IM5	prad_cdk12_mskcc_2020:P-0008301	0	NO	Prostate Cancer	Prostate Adenocarcinoma	0.0344	IMPACT410	MSKCC	Bone	NA	0.16	Stable	4	PRAD	Prostate	Tumor	1	916	Metastasis	Male	Matched	2.93616	10	NA	NA	NA	NA	NA	NA	NA	NA	NA	NA	NA	NA	NA	NA	NA	NA	NA	NA	NA	NA	NA	NA	NA
prad_cdk12_mskcc_2020	P-0008315	P-0008315-T01-IM5	prad_cdk12_mskcc_2020:P-0008315-T01-IM5	prad_cdk12_mskcc_2020:P-0008315	0	NO	Prostate Cancer	Prostate Adenocarcinoma	0.2679	IMPACT410	MSKCC	Liver	NA	0.92	Stable	5	PRAD	Prostate	Tumor	1	987	Metastasis	Male	Matched	4.8936	60	NA	NA	NA	NA	NA	NA	NA	NA	NA	NA	NA	NA	NA	NA	NA	NA	NA	NA	NA	NA	NA	NA	NA
prad_cdk12_mskcc_2020	P-0008330	P-0008330-T01-IM5	prad_cdk12_mskcc_2020:P-0008330-T01-IM5	prad_cdk12_mskcc_2020:P-0008330	0	NO	Prostate Cancer	Prostate Adenocarcinoma	0.3141	IMPACT410	MSKCC	Lung	NA	0.37	Stable	2	PRAD	Prostate	Tumor	1	961	Metastasis	Male	Matched	1.95744	60	NA	NA	NA	NA	NA	NA	NA	NA	NA	NA	NA	NA	NA	NA	NA	NA	NA	NA	NA	NA	NA	NA	NA
prad_cdk12_mskcc_2020	P-0008339	P-0008339-T02-IM6	prad_cdk12_mskcc_2020:P-0008339-T02-IM6	prad_cdk12_mskcc_2020:P-0008339	0	NO	Prostate Cancer	Prostate Adenocarcinoma	0.0517	IMPACT468	MSKCC	Sacral Mass	MICROSATELLITE STABLE (MSS). See MSI note below.	0	Stable	5	PRAD	Prostate	Tumor	1	564	Metastasis	Male	Matched	4.32349	30	NA	NA	NA	NA	NA	NA	NA	NA	NA	NA	NA	NA	NA	NA	NA	NA	NA	NA	NA	NA	NA	NA	NA
prad_cdk12_mskcc_2020	P-0008344	P-0008344-T01-IM5	prad_cdk12_mskcc_2020:P-0008344-T01-IM5	prad_cdk12_mskcc_2020:P-0008344	0	NO	Prostate Cancer	Prostate Adenocarcinoma	0.565	IMPACT410	MSKCC	Bone	NA	0.47	Stable	6	PRAD	Prostate	Tumor	1	1035	Metastasis	Male	Matched	5.87232	20	NA	NA	NA	NA	NA	NA	NA	NA	NA	NA	NA	NA	NA	NA	NA	NA	NA	NA	NA	NA	NA	NA	NA
prad_cdk12_mskcc_2020	P-0008348	P-0008348-T02-IM5	prad_cdk12_mskcc_2020:P-0008348-T02-IM5	prad_cdk12_mskcc_2020:P-0008348	0	NO	Prostate Cancer	Prostate Adenocarcinoma	0.5191	IMPACT410	MSKCC	Lymph Node	NA	3.15	Indeterminate	3	PRAD	Prostate	Tumor	1	1236	Metastasis	Male	Matched	2.93616	50	NA	NA	NA	NA	NA	NA	NA	NA	NA	NA	NA	NA	NA	NA	NA	NA	NA	NA	NA	NA	NA	NA	NA
prad_cdk12_mskcc_2020	P-0008383	P-0008383-T01-IM5	prad_cdk12_mskcc_2020:P-0008383-T01-IM5	prad_cdk12_mskcc_2020:P-0008383	0	NO	Prostate Cancer	Prostate Adenocarcinoma	0.0032	IMPACT410	MSKCC	Lymph Node	NA	0.37	Stable	1	PRAD	Prostate	Tumor	1	878	Metastasis	Male	Matched	0.97872	10	NA	NA	NA	NA	NA	NA	NA	NA	NA	NA	NA	NA	NA	NA	NA	NA	NA	NA	NA	NA	NA	NA	NA
prad_cdk12_mskcc_2020	P-0008390	P-0008390-T01-IM5	prad_cdk12_mskcc_2020:P-0008390-T01-IM5	prad_cdk12_mskcc_2020:P-0008390	0	NO	Prostate Cancer	Prostate Adenocarcinoma	0.5594	IMPACT410	MSKCC	Liver	NA	2.48	Stable	6	PRAD	Prostate	Tumor	1	1331	Metastasis	Male	Matched	5.87232	70	NA	NA	NA	NA	NA	NA	NA	NA	NA	NA	NA	NA	NA	NA	NA	NA	NA	NA	NA	NA	NA	NA	NA
prad_cdk12_mskcc_2020	P-0008431	P-0008431-T01-IM5	prad_cdk12_mskcc_2020:P-0008431-T01-IM5	prad_cdk12_mskcc_2020:P-0008431	0	NO	Prostate Cancer	Prostate Adenocarcinoma	0.0003	IMPACT410	MSKCC	Soft Tissue	MICROSATELLITE STABLE (MSS). See MSI note below.	0	Stable	NA	PRAD	Prostate	Tumor	1	840	Metastasis	Male	Matched	0	10	NA	NA	NA	NA	NA	NA	NA	NA	NA	NA	NA	NA	NA	NA	NA	NA	NA	NA	NA	NA	NA	NA	NA
prad_cdk12_mskcc_2020	P-0008441	P-0008441-T01-IM5	prad_cdk12_mskcc_2020:P-0008441-T01-IM5	prad_cdk12_mskcc_2020:P-0008441	0	NO	Prostate Cancer	Prostate Adenocarcinoma	0.5474	IMPACT410	MSKCC	Lymph Node	NA	2.07	Stable	1	PRAD	Prostate	Tumor	1	960	Metastasis	Male	Matched	0.97872	70	NA	NA	NA	NA	NA	NA	NA	NA	NA	NA	NA	NA	NA	NA	NA	NA	NA	NA	NA	NA	NA	NA	NA
prad_cdk12_mskcc_2020	P-0008461	P-0008461-T01-IM5	prad_cdk12_mskcc_2020:P-0008461-T01-IM5	prad_cdk12_mskcc_2020:P-0008461	0	NO	Prostate Cancer	Prostate Adenocarcinoma	0.118	IMPACT410	MSKCC	Retroperitoneum	NA	0.72	Stable	6	PRAD	Prostate	Tumor	1	716	Metastasis	Male	Matched	5.87232	40	NA	NA	NA	NA	NA	NA	NA	NA	NA	NA	NA	NA	NA	NA	NA	NA	NA	NA	NA	NA	NA	NA	NA
prad_cdk12_mskcc_2020	P-0008591	P-0008591-T01-IM5	prad_cdk12_mskcc_2020:P-0008591-T01-IM5	prad_cdk12_mskcc_2020:P-0008591	0	NO	Prostate Cancer	Prostate Adenocarcinoma	0.5429	IMPACT410	MSKCC	Brain	NA	2.23	Stable	2	PRAD	Prostate	Tumor	1	794	Metastasis	Male	Matched	1.95744	70	NA	NA	NA	NA	NA	NA	NA	NA	NA	NA	NA	NA	NA	NA	NA	NA	NA	NA	NA	NA	NA	NA	NA
prad_cdk12_mskcc_2020	P-0008769	P-0008769-T02-IM5	prad_cdk12_mskcc_2020:P-0008769-T02-IM5	prad_cdk12_mskcc_2020:P-0008769	0	NO	Prostate Cancer	Prostate Adenocarcinoma	0.1887	IMPACT410	MSKCC	Lung	MICROSATELLITE STABLE (MSS). See MSI note below.	0.25	Stable	4	PRAD	Prostate	Tumor	1	673	Metastasis	Male	Matched	3.91488	80	NA	NA	NA	NA	NA	NA	NA	NA	NA	NA	NA	NA	NA	NA	NA	NA	NA	NA	NA	NA	NA	NA	NA
prad_cdk12_mskcc_2020	P-0008771	P-0008771-T01-IM5	prad_cdk12_mskcc_2020:P-0008771-T01-IM5	prad_cdk12_mskcc_2020:P-0008771	0	NO	Prostate Cancer	Prostate Adenocarcinoma	0.1756	IMPACT410	MSKCC	Lymph Node	NA	0.16	Stable	3	PRAD	Prostate	Tumor	1	826	Metastasis	Male	Matched	2.93616	80	NA	NA	NA	NA	NA	NA	NA	NA	NA	NA	NA	NA	NA	NA	NA	NA	NA	NA	NA	NA	NA	NA	NA
prad_cdk12_mskcc_2020	P-0008920	P-0008920-T01-IM5	prad_cdk12_mskcc_2020:P-0008920-T01-IM5	prad_cdk12_mskcc_2020:P-0008920	0	NO	Prostate Cancer	Prostate Adenocarcinoma	0.1776	IMPACT410	MSKCC	Testis	NA	0.31	Stable	4	PRAD	Prostate	Tumor	1	699	Metastasis	Male	Matched	3.91488	70	NA	NA	NA	NA	NA	NA	NA	NA	NA	NA	NA	NA	NA	NA	NA	NA	NA	NA	NA	NA	NA	NA	NA
prad_cdk12_mskcc_2020	P-0008928	P-0008928-T01-IM5	prad_cdk12_mskcc_2020:P-0008928-T01-IM5	prad_cdk12_mskcc_2020:P-0008928	0	NO	Prostate Cancer	Prostate Adenocarcinoma	0.0451	IMPACT410	MSKCC	Lymph Node	MICROSATELLITE STABLE (MSS). See MSI note below.	0.08	Stable	4	PRAD	Prostate	Tumor	1	1164	Metastasis	Male	Matched	3.91488	40	NA	NA	NA	NA	NA	NA	NA	NA	NA	NA	NA	NA	NA	NA	NA	NA	NA	NA	NA	NA	NA	NA	NA
prad_cdk12_mskcc_2020	P-0008954	P-0008954-T01-IM5	prad_cdk12_mskcc_2020:P-0008954-T01-IM5	prad_cdk12_mskcc_2020:P-0008954	0	NO	Prostate Cancer	Prostate Adenocarcinoma	0.3322	IMPACT410	MSKCC	Lymph Node	MICROSATELLITE STABLE (MSS). See MSI note below.	1.26	Stable	1	PRAD	Prostate	Tumor	1	919	Metastasis	Male	Matched	0.97872	95	NA	NA	NA	NA	NA	NA	NA	NA	NA	NA	NA	NA	NA	NA	NA	NA	NA	NA	NA	NA	NA	NA	NA
prad_cdk12_mskcc_2020	P-0008960	P-0008960-T02-IM6	prad_cdk12_mskcc_2020:P-0008960-T02-IM6	prad_cdk12_mskcc_2020:P-0008960	0	NO	Prostate Cancer	Prostate Adenocarcinoma	0.6219	IMPACT468	MSKCC	Lymph Node	NA	0.96	Do not report	1	PRAD	Prostate	Tumor	1	742	Metastasis	Male	Matched	0.864698	70	NA	NA	NA	NA	NA	NA	NA	NA	NA	NA	NA	NA	NA	NA	NA	NA	NA	NA	NA	NA	NA	NA	NA
prad_cdk12_mskcc_2020	P-0008966	P-0008966-T01-IM5	prad_cdk12_mskcc_2020:P-0008966-T01-IM5	prad_cdk12_mskcc_2020:P-0008966	0	NO	Prostate Cancer	Prostate Adenocarcinoma	0.2619	IMPACT410	MSKCC	Pelvis	NA	0.88	Stable	6	PRAD	Prostate	Tumor	1	876	Metastasis	Male	Matched	5.87232	50	NA	NA	NA	NA	NA	NA	NA	NA	NA	NA	NA	NA	NA	NA	NA	NA	NA	NA	NA	NA	NA	NA	NA
prad_cdk12_mskcc_2020	P-0009002	P-0009002-T01-IM5	prad_cdk12_mskcc_2020:P-0009002-T01-IM5	prad_cdk12_mskcc_2020:P-0009002	0	NO	Prostate Cancer	Prostate Adenocarcinoma	0.0423	IMPACT410	MSKCC	Liver	MICROSATELLITE STABLE (MSS). See MSI note below.	0	Stable	2	PRAD	Prostate	Tumor	1	1058	Metastasis	Male	Matched	1.95744	20	NA	NA	NA	NA	NA	NA	NA	NA	NA	NA	NA	NA	NA	NA	NA	NA	NA	NA	NA	NA	NA	NA	NA
prad_cdk12_mskcc_2020	P-0009024	P-0009024-T01-IM5	prad_cdk12_mskcc_2020:P-0009024-T01-IM5	prad_cdk12_mskcc_2020:P-0009024	0	NO	Prostate Cancer	Prostate Adenocarcinoma	0.3222	IMPACT410	MSKCC	Bladder	NA	0.83	Stable	1	PRAD	Prostate	Tumor	1	938	Metastasis	Male	Matched	0.97872	75	NA	NA	NA	NA	NA	NA	NA	NA	NA	NA	NA	NA	NA	NA	NA	NA	NA	NA	NA	NA	NA	NA	NA
prad_cdk12_mskcc_2020	P-0009056	P-0009056-T02-IM6	prad_cdk12_mskcc_2020:P-0009056-T02-IM6	prad_cdk12_mskcc_2020:P-0009056	0	NO	Prostate Cancer	Prostate Adenocarcinoma	0.6973	IMPACT468	MSKCC	Lymph Node	NA	2.61	Do not report	6	PRAD	Prostate	Tumor	1	996	Metastasis	Male	Matched	5.18819	60	NA	NA	NA	NA	NA	NA	NA	NA	NA	NA	NA	NA	NA	NA	NA	NA	NA	NA	NA	NA	NA	NA	NA
prad_cdk12_mskcc_2020	P-0009082	P-0009082-T01-IM5	prad_cdk12_mskcc_2020:P-0009082-T01-IM5	prad_cdk12_mskcc_2020:P-0009082	0	NO	Prostate Cancer	Prostate Adenocarcinoma	0.4221	IMPACT410	MSKCC	Bone	NA	0.53	Stable	2	PRAD	Prostate	Tumor	1	838	Metastasis	Male	Matched	1.95744	90	NA	NA	NA	NA	NA	NA	NA	NA	NA	NA	NA	NA	NA	NA	NA	NA	NA	NA	NA	NA	NA	NA	NA
prad_cdk12_mskcc_2020	P-0009374	P-0009374-T02-IM5	prad_cdk12_mskcc_2020:P-0009374-T02-IM5	prad_cdk12_mskcc_2020:P-0009374	0	NO	Prostate Cancer	Prostate Adenocarcinoma	0.4093	IMPACT410	MSKCC	Liver	MICROSATELLITE STABLE (MSS). See MSI note below.	2.7	Stable	3	PRAD	Prostate	Tumor	1	943	Metastasis	Male	Matched	2.93616	60	NA	NA	NA	NA	NA	NA	NA	NA	NA	NA	NA	NA	NA	NA	NA	NA	NA	NA	NA	NA	NA	NA	NA
prad_cdk12_mskcc_2020	P-0009393	P-0009393-T01-IM5	prad_cdk12_mskcc_2020:P-0009393-T01-IM5	prad_cdk12_mskcc_2020:P-0009393	0	NO	Prostate Cancer	Prostate Adenocarcinoma	0.1164	IMPACT410	MSKCC	Lymph Node	NA	1.43	Stable	1	PRAD	Prostate	Tumor	1	201	Metastasis	Male	Matched	0.97872	60	NA	NA	NA	NA	NA	NA	NA	NA	NA	NA	NA	NA	NA	NA	NA	NA	NA	NA	NA	NA	NA	NA	NA
prad_cdk12_mskcc_2020	P-0009399	P-0009399-T01-IM5	prad_cdk12_mskcc_2020:P-0009399-T01-IM5	prad_cdk12_mskcc_2020:P-0009399	0	NO	Prostate Cancer	Prostate Adenocarcinoma	0.5588	IMPACT410	MSKCC	Pleura	NA	4.1	Indeterminate	5	PRAD	Prostate	Tumor	1	1211	Metastasis	Male	Matched	4.8936	80	NA	NA	NA	NA	NA	NA	NA	NA	NA	NA	NA	NA	NA	NA	NA	NA	NA	NA	NA	NA	NA	NA	NA
prad_cdk12_mskcc_2020	P-0009401	P-0009401-T02-IM6	prad_cdk12_mskcc_2020:P-0009401-T02-IM6	prad_cdk12_mskcc_2020:P-0009401	0	NO	Prostate Cancer	Prostate Adenocarcinoma	0.5071	IMPACT468	MSKCC	Lymph Node	MICROSATELLITE STABLE (MSS). See MSI note below.	0.92	Stable	3	PRAD	Prostate	Tumor	1	850	Metastasis	Male	Matched	2.59409	30	NA	NA	NA	NA	NA	NA	NA	NA	NA	NA	NA	NA	NA	NA	NA	NA	NA	NA	NA	NA	NA	NA	NA
prad_cdk12_mskcc_2020	P-0009402	P-0009402-T02-IM6	prad_cdk12_mskcc_2020:P-0009402-T02-IM6	prad_cdk12_mskcc_2020:P-0009402	0	NO	Prostate Cancer	Prostate Adenocarcinoma	0.3269	IMPACT468	MSKCC	Liver	MICROSATELLITE STABLE (MSS). See MSI note below.	0.18	Stable	5	PRAD	Prostate	Tumor	1	645	Metastasis	Male	Matched	4.32349	50	NA	NA	NA	NA	NA	NA	NA	NA	NA	NA	NA	NA	NA	NA	NA	NA	NA	NA	NA	NA	NA	NA	NA
prad_cdk12_mskcc_2020	P-0009448	P-0009448-T01-IM5	prad_cdk12_mskcc_2020:P-0009448-T01-IM5	prad_cdk12_mskcc_2020:P-0009448	0	NO	Prostate Cancer	Prostate Adenocarcinoma	0.0102	IMPACT410	MSKCC	Lymph Node	MICROSATELLITE STABLE (MSS). See MSI note below.	0	Stable	4	PRAD	Prostate	Tumor	1	650	Metastasis	Male	Matched	3.91488	10	NA	NA	NA	NA	NA	NA	NA	NA	NA	NA	NA	NA	NA	NA	NA	NA	NA	NA	NA	NA	NA	NA	NA
prad_cdk12_mskcc_2020	P-0009502	P-0009502-T01-IM5	prad_cdk12_mskcc_2020:P-0009502-T01-IM5	prad_cdk12_mskcc_2020:P-0009502	0	NO	Prostate Cancer	Prostate Adenocarcinoma	0.013	IMPACT410	MSKCC	Bone	MICROSATELLITE STABLE (MSS). See MSI note below.	0	Stable	NA	PRAD	Prostate	Tumor	1	711	Metastasis	Male	Matched	0	10	NA	NA	NA	NA	NA	NA	NA	NA	NA	NA	NA	NA	NA	NA	NA	NA	NA	NA	NA	NA	NA	NA	NA
prad_cdk12_mskcc_2020	P-0009543	P-0009543-T02-IM5	prad_cdk12_mskcc_2020:P-0009543-T02-IM5	prad_cdk12_mskcc_2020:P-0009543	0	NO	Prostate Cancer	Prostate Adenocarcinoma	0.5054	IMPACT410	MSKCC	Brain	NA	1.28	Stable	NA	PRAD	Prostate	Tumor	1	744	Metastasis	Male	Matched	0	80	NA	NA	NA	NA	NA	NA	NA	NA	NA	NA	NA	NA	NA	NA	NA	NA	NA	NA	NA	NA	NA	NA	NA
prad_cdk12_mskcc_2020	P-0009654	P-0009654-T01-IM5	prad_cdk12_mskcc_2020:P-0009654-T01-IM5	prad_cdk12_mskcc_2020:P-0009654	0	NO	Prostate Cancer	Prostate Adenocarcinoma	0.192	IMPACT410	MSKCC	Lung	NA	0.6	Stable	3	PRAD	Prostate	Tumor	1	1449	Metastasis	Male	Matched	2.93616	40	NA	NA	NA	NA	NA	NA	NA	NA	NA	NA	NA	NA	NA	NA	NA	NA	NA	NA	NA	NA	NA	NA	NA
prad_cdk12_mskcc_2020	P-0009656	P-0009656-T01-IM5	prad_cdk12_mskcc_2020:P-0009656-T01-IM5	prad_cdk12_mskcc_2020:P-0009656	0	NO	Prostate Cancer	Prostate Adenocarcinoma	0.4492	IMPACT410	MSKCC	Kidney	MICROSATELLITE STABLE (MSS). See MSI note below.	0.86	Stable	3	PRAD	Prostate	Tumor	1	762	Metastasis	Male	Matched	2.93616	30	NA	NA	NA	NA	NA	NA	NA	NA	NA	NA	NA	NA	NA	NA	NA	NA	NA	NA	NA	NA	NA	NA	NA
prad_cdk12_mskcc_2020	P-0009687	P-0009687-T01-IM5	prad_cdk12_mskcc_2020:P-0009687-T01-IM5	prad_cdk12_mskcc_2020:P-0009687	0	NO	Prostate Cancer	Prostate Adenocarcinoma	0.2842	IMPACT410	MSKCC	Lymph Node	NA	0.75	Stable	1	PRAD	Prostate	Tumor	1	610	Metastasis	Male	Matched	0.97872	60	NA	NA	NA	NA	NA	NA	NA	NA	NA	NA	NA	NA	NA	NA	NA	NA	NA	NA	NA	NA	NA	NA	NA
prad_cdk12_mskcc_2020	P-0009746	P-0009746-T02-IM5	prad_cdk12_mskcc_2020:P-0009746-T02-IM5	prad_cdk12_mskcc_2020:P-0009746	0	NO	Prostate Cancer	Prostate Adenocarcinoma	0.1038	IMPACT410	MSKCC	Bone	NA	0.08	Stable	1	PRAD	Prostate	Tumor	1	1286	Metastasis	Male	Matched	0.97872	40	NA	NA	NA	NA	NA	NA	NA	NA	NA	NA	NA	NA	NA	NA	NA	NA	NA	NA	NA	NA	NA	NA	NA
prad_cdk12_mskcc_2020	P-0009818	P-0009818-T01-IM5	prad_cdk12_mskcc_2020:P-0009818-T01-IM5	prad_cdk12_mskcc_2020:P-0009818	0	NO	Prostate Cancer	Prostate Adenocarcinoma	0.01	IMPACT410	MSKCC	Lymph Node	MICROSATELLITE STABLE (MSS). See MSI note below.	0	Stable	2	PRAD	Prostate	Tumor	1	864	Metastasis	Male	Matched	1.95744	30	NA	NA	NA	NA	NA	NA	NA	NA	NA	NA	NA	NA	NA	NA	NA	NA	NA	NA	NA	NA	NA	NA	NA
prad_cdk12_mskcc_2020	P-0009853	P-0009853-T01-IM5	prad_cdk12_mskcc_2020:P-0009853-T01-IM5	prad_cdk12_mskcc_2020:P-0009853	0	NO	Prostate Cancer	Prostate Adenocarcinoma	0.2129	IMPACT410	MSKCC	Bladder	NA	1	Stable	6	PRAD	Prostate	Tumor	1	932	Metastasis	Male	Matched	5.87232	50	NA	NA	NA	NA	NA	NA	NA	NA	NA	NA	NA	NA	NA	NA	NA	NA	NA	NA	NA	NA	NA	NA	NA
prad_cdk12_mskcc_2020	P-0009908	P-0009908-T02-IM6	prad_cdk12_mskcc_2020:P-0009908-T02-IM6	prad_cdk12_mskcc_2020:P-0009908	0	YES	Prostate Cancer	Prostate Adenocarcinoma	0.2031	IMPACT468	MSKCC	Lymph node	NA	0.47	Do not report	3	PRAD	Prostate	Tumor	1	904	Metastasis	Male	Matched	2.59409	50	NA	NA	NA	NA	NA	NA	NA	NA	NA	NA	NA	NA	NA	NA	NA	NA	NA	NA	NA	NA	NA	NA	NA
prad_cdk12_mskcc_2020	P-0009982	P-0009982-T01-IM5	prad_cdk12_mskcc_2020:P-0009982-T01-IM5	prad_cdk12_mskcc_2020:P-0009982	0	NO	Prostate Cancer	Prostate Adenocarcinoma	0.0668	IMPACT410	MSKCC	Bone	NA	0.34	Stable	4	PRAD	Prostate	Tumor	1	1017	Metastasis	Male	Matched	3.91488	20	NA	NA	NA	NA	NA	NA	NA	NA	NA	NA	NA	NA	NA	NA	NA	NA	NA	NA	NA	NA	NA	NA	NA
prad_cdk12_mskcc_2020	P-0009989	P-0009989-T01-IM5	prad_cdk12_mskcc_2020:P-0009989-T01-IM5	prad_cdk12_mskcc_2020:P-0009989	0	NO	Prostate Cancer	Prostate Adenocarcinoma	0.3444	IMPACT410	MSKCC	Lymph Node	NA	0.79	Stable	5	PRAD	Prostate	Tumor	1	1140	Metastasis	Male	Matched	4.8936	70	NA	NA	NA	NA	NA	NA	NA	NA	NA	NA	NA	NA	NA	NA	NA	NA	NA	NA	NA	NA	NA	NA	NA
prad_cdk12_mskcc_2020	P-0009990	P-0009990-T01-IM5	prad_cdk12_mskcc_2020:P-0009990-T01-IM5	prad_cdk12_mskcc_2020:P-0009990	0	NO	Prostate Cancer	Prostate Adenocarcinoma	0.0102	IMPACT410	MSKCC	Lymph Node	NA	0	Stable	1	PRAD	Prostate	Tumor	1	876	Metastasis	Male	Matched	0.97872	20	NA	NA	NA	NA	NA	NA	NA	NA	NA	NA	NA	NA	NA	NA	NA	NA	NA	NA	NA	NA	NA	NA	NA
prad_cdk12_mskcc_2020	P-0010015	P-0010015-T01-IM5	prad_cdk12_mskcc_2020:P-0010015-T01-IM5	prad_cdk12_mskcc_2020:P-0010015	0	NO	Prostate Cancer	Prostate Adenocarcinoma	0.426	IMPACT410	MSKCC	Lymph Node	NA	1.42	Stable	4	PRAD	Prostate	Tumor	1	1199	Metastasis	Male	Matched	3.91488	80	NA	NA	NA	NA	NA	NA	NA	NA	NA	NA	NA	NA	NA	NA	NA	NA	NA	NA	NA	NA	NA	NA	NA
prad_cdk12_mskcc_2020	P-0010029	P-0010029-T01-IM5	prad_cdk12_mskcc_2020:P-0010029-T01-IM5	prad_cdk12_mskcc_2020:P-0010029	0	NO	Prostate Cancer	Prostate Adenocarcinoma	0.0327	IMPACT410	MSKCC	Bone	MICROSATELLITE STABLE (MSS). See MSI note below.	0	Stable	NA	PRAD	Prostate	Tumor	1	1013	Metastasis	Male	Matched	0	20	NA	NA	NA	NA	NA	NA	NA	NA	NA	NA	NA	NA	NA	NA	NA	NA	NA	NA	NA	NA	NA	NA	NA
prad_cdk12_mskcc_2020	P-0010078	P-0010078-T01-IM5	prad_cdk12_mskcc_2020:P-0010078-T01-IM5	prad_cdk12_mskcc_2020:P-0010078	0	NO	Prostate Cancer	Prostate Adenocarcinoma	0.3405	IMPACT410	MSKCC	Adrenal Gland	NA	0.38	Stable	5	PRAD	Prostate	Tumor	1	617	Metastasis	Male	Matched	4.8936	30	NA	NA	NA	NA	NA	NA	NA	NA	NA	NA	NA	NA	NA	NA	NA	NA	NA	NA	NA	NA	NA	NA	NA
prad_cdk12_mskcc_2020	P-0010178	P-0010178-T02-IM6	prad_cdk12_mskcc_2020:P-0010178-T02-IM6	prad_cdk12_mskcc_2020:P-0010178	0	NO	Prostate Cancer	Prostate Adenocarcinoma	0.039	IMPACT468	MSKCC	Lymph Node	MICROSATELLITE STABLE (MSS). This result is for investigational use only. See MSI note below.	0.61	Stable	1	PRAD	Prostate	Tumor	1	691	Metastasis	Male	Matched	0.864698	50	NA	NA	NA	NA	NA	NA	NA	NA	NA	NA	NA	NA	NA	NA	NA	NA	NA	NA	NA	NA	NA	NA	NA
prad_cdk12_mskcc_2020	P-0010230	P-0010230-T01-IM5	prad_cdk12_mskcc_2020:P-0010230-T01-IM5	prad_cdk12_mskcc_2020:P-0010230	0	NO	Prostate Cancer	Prostate Adenocarcinoma	0.011	IMPACT410	MSKCC	Lymph Node	MICROSATELLITE STABLE (MSS). See MSI note below.	0.16	Stable	NA	PRAD	Prostate	Tumor	1	848	Metastasis	Male	Matched	0	10	NA	NA	NA	NA	NA	NA	NA	NA	NA	NA	NA	NA	NA	NA	NA	NA	NA	NA	NA	NA	NA	NA	NA
prad_cdk12_mskcc_2020	P-0010240	P-0010240-T01-IM5	prad_cdk12_mskcc_2020:P-0010240-T01-IM5	prad_cdk12_mskcc_2020:P-0010240	0	NO	Prostate Cancer	Prostate Adenocarcinoma	0.0476	IMPACT410	MSKCC	Lymph Node	MICROSATELLITE STABLE (MSS). See MSI note below.	0	Stable	5	PRAD	Prostate	Tumor	1	655	Metastasis	Male	Matched	4.8936	70	NA	NA	NA	NA	NA	NA	NA	NA	NA	NA	NA	NA	NA	NA	NA	NA	NA	NA	NA	NA	NA	NA	NA
prad_cdk12_mskcc_2020	P-0010248	P-0010248-T01-IM5	prad_cdk12_mskcc_2020:P-0010248-T01-IM5	prad_cdk12_mskcc_2020:P-0010248	0	NO	Prostate Cancer	Prostate Adenocarcinoma	0.0035	IMPACT410	MSKCC	Lymph Node	MICROSATELLITE STABLE (MSS). See MSI note below.	0	Stable	NA	PRAD	Prostate	Tumor	1	562	Metastasis	Male	Matched	0	10	NA	NA	NA	NA	NA	NA	NA	NA	NA	NA	NA	NA	NA	NA	NA	NA	NA	NA	NA	NA	NA	NA	NA
prad_cdk12_mskcc_2020	P-0010272	P-0010272-T01-IM5	prad_cdk12_mskcc_2020:P-0010272-T01-IM5	prad_cdk12_mskcc_2020:P-0010272	0	NO	Prostate Cancer	Prostate Adenocarcinoma	0.4341	IMPACT410	MSKCC	Bone	NA	0.67	Stable	4	PRAD	Prostate	Tumor	1	889	Metastasis	Male	Matched	3.91488	60	NA	NA	NA	NA	NA	NA	NA	NA	NA	NA	NA	NA	NA	NA	NA	NA	NA	NA	NA	NA	NA	NA	NA
prad_cdk12_mskcc_2020	P-0010309	P-0010309-T01-IM5	prad_cdk12_mskcc_2020:P-0010309-T01-IM5	prad_cdk12_mskcc_2020:P-0010309	0	NO	Prostate Cancer	Prostate Adenocarcinoma	0.1962	IMPACT410	MSKCC	Lymph Node	NA	0.49	Stable	4	PRAD	Prostate	Tumor	1	1175	Metastasis	Male	Matched	3.91488	30	NA	NA	NA	NA	NA	NA	NA	NA	NA	NA	NA	NA	NA	NA	NA	NA	NA	NA	NA	NA	NA	NA	NA
prad_cdk12_mskcc_2020	P-0010315	P-0010315-T03-IM5	prad_cdk12_mskcc_2020:P-0010315-T03-IM5	prad_cdk12_mskcc_2020:P-0010315	0	NO	Prostate Cancer	Prostate Adenocarcinoma	0.157	IMPACT410	MSKCC	NA	NA	0.27	Do not report	3	PRAD	Prostate	Tumor	1	834	Metastasis	Male	Matched	2.93616	20	NA	NA	NA	NA	NA	NA	NA	NA	NA	NA	NA	NA	NA	NA	NA	NA	NA	NA	NA	NA	NA	NA	NA
prad_cdk12_mskcc_2020	P-0010518	P-0010518-T01-IM5	prad_cdk12_mskcc_2020:P-0010518-T01-IM5	prad_cdk12_mskcc_2020:P-0010518	0	NO	Prostate Cancer	Prostate Adenocarcinoma	0.5777	IMPACT410	MSKCC	Lung	NA	1.15	Stable	7	PRAD	Prostate	Tumor	1	1080	Metastasis	Male	Matched	6.85104	50	NA	NA	NA	NA	NA	NA	NA	NA	NA	NA	NA	NA	NA	NA	NA	NA	NA	NA	NA	NA	NA	NA	NA
prad_cdk12_mskcc_2020	P-0010523	P-0010523-T01-IM5	prad_cdk12_mskcc_2020:P-0010523-T01-IM5	prad_cdk12_mskcc_2020:P-0010523	0	NO	Prostate Cancer	Prostate Adenocarcinoma	0.164	IMPACT410	MSKCC	Bone	NA	0.47	Stable	1	PRAD	Prostate	Tumor	1	1336	Metastasis	Male	Matched	0.97872	30	NA	NA	NA	NA	NA	NA	NA	NA	NA	NA	NA	NA	NA	NA	NA	NA	NA	NA	NA	NA	NA	NA	NA
prad_cdk12_mskcc_2020	P-0010529	P-0010529-T01-IM5	prad_cdk12_mskcc_2020:P-0010529-T01-IM5	prad_cdk12_mskcc_2020:P-0010529	0	NO	Prostate Cancer	Prostate Adenocarcinoma	0.6102	IMPACT410	MSKCC	Bladder	MICROSATELLITE STABLE (MSS). See MSI note below.	2.05	Stable	3	PRAD	Prostate	Tumor	1	904	Metastasis	Male	Matched	2.93616	60	NA	NA	NA	NA	NA	NA	NA	NA	NA	NA	NA	NA	NA	NA	NA	NA	NA	NA	NA	NA	NA	NA	NA
prad_cdk12_mskcc_2020	P-0010565	P-0010565-T01-IM5	prad_cdk12_mskcc_2020:P-0010565-T01-IM5	prad_cdk12_mskcc_2020:P-0010565	0	NO	Prostate Cancer	Prostate Adenocarcinoma	0.2161	IMPACT410	MSKCC	Lymph Node	MICROSATELLITE STABLE (MSS). See MSI note below.	0.64	Stable	2	PRAD	Prostate	Tumor	1	1066	Metastasis	Male	Matched	1.95744	50	NA	NA	NA	NA	NA	NA	NA	NA	NA	NA	NA	NA	NA	NA	NA	NA	NA	NA	NA	NA	NA	NA	NA
prad_cdk12_mskcc_2020	P-0010746	P-0010746-T01-IM5	prad_cdk12_mskcc_2020:P-0010746-T01-IM5	prad_cdk12_mskcc_2020:P-0010746	0	NO	Prostate Cancer	Prostate Adenocarcinoma	0.1932	IMPACT410	MSKCC	Bone	NA	0.23	Stable	2	PRAD	Prostate	Tumor	1	1191	Metastasis	Male	Matched	1.95744	30	NA	NA	NA	NA	NA	NA	NA	NA	NA	NA	NA	NA	NA	NA	NA	NA	NA	NA	NA	NA	NA	NA	NA
prad_cdk12_mskcc_2020	P-0010796	P-0010796-T02-IM6	prad_cdk12_mskcc_2020:P-0010796-T02-IM6	prad_cdk12_mskcc_2020:P-0010796	0	NO	Prostate Cancer	Prostate Adenocarcinoma	0.4611	IMPACT468	MSKCC	Lymph Node	NA	2.04	Do not report	2	PRAD	Prostate	Tumor	1	837	Metastasis	Male	Matched	1.7294	60	NA	NA	NA	NA	NA	NA	NA	NA	NA	NA	NA	NA	NA	NA	NA	NA	NA	NA	NA	NA	NA	NA	NA
prad_cdk12_mskcc_2020	P-0010823	P-0010823-T02-IM6	prad_cdk12_mskcc_2020:P-0010823-T02-IM6	prad_cdk12_mskcc_2020:P-0010823	0	NO	Prostate Cancer	Prostate Adenocarcinoma	0.6386	IMPACT468	MSKCC	Liver	MICROSATELLITE STABLE (MSS). See MSI note below.	2.05	Stable	9	PRAD	Prostate	Tumor	1	941	Metastasis	Male	Matched	7.78228	60	NA	NA	NA	NA	NA	NA	NA	NA	NA	NA	NA	NA	NA	NA	NA	NA	NA	NA	NA	NA	NA	NA	NA
prad_cdk12_mskcc_2020	P-0010953	P-0010953-T01-IM5	prad_cdk12_mskcc_2020:P-0010953-T01-IM5	prad_cdk12_mskcc_2020:P-0010953	0	NO	Prostate Cancer	Prostate Adenocarcinoma	0.0111	IMPACT410	MSKCC	Lymph Node	NA	0.16	Stable	2	PRAD	Prostate	Tumor	1	1163	Metastasis	Male	Matched	1.95744	20	NA	NA	NA	NA	NA	NA	NA	NA	NA	NA	NA	NA	NA	NA	NA	NA	NA	NA	NA	NA	NA	NA	NA
prad_cdk12_mskcc_2020	P-0011003	P-0011003-T01-IM5	prad_cdk12_mskcc_2020:P-0011003-T01-IM5	prad_cdk12_mskcc_2020:P-0011003	0	NO	Prostate Cancer	Prostate Adenocarcinoma	0.0881	IMPACT410	MSKCC	Liver	NA	0	Stable	7	PRAD	Prostate	Tumor	1	1267	Metastasis	Male	Matched	6.85104	25	NA	NA	NA	NA	NA	NA	NA	NA	NA	NA	NA	NA	NA	NA	NA	NA	NA	NA	NA	NA	NA	NA	NA
prad_cdk12_mskcc_2020	P-0011088	P-0011088-T01-IM5	prad_cdk12_mskcc_2020:P-0011088-T01-IM5	prad_cdk12_mskcc_2020:P-0011088	0	NO	Prostate Cancer	Prostate Adenocarcinoma	0.2735	IMPACT410	MSKCC	Lymph Node	NA	1.59	Stable	3	PRAD	Prostate	Tumor	1	1544	Metastasis	Male	Matched	2.93616	40	NA	NA	NA	NA	NA	NA	NA	NA	NA	NA	NA	NA	NA	NA	NA	NA	NA	NA	NA	NA	NA	NA	NA
prad_cdk12_mskcc_2020	P-0011090	P-0011090-T01-IM5	prad_cdk12_mskcc_2020:P-0011090-T01-IM5	prad_cdk12_mskcc_2020:P-0011090	0	NO	Prostate Cancer	Prostate Adenocarcinoma	0.2085	IMPACT410	MSKCC	Lymph Node	NA	1.1	Stable	5	PRAD	Prostate	Tumor	1	1492	Metastasis	Male	Matched	4.8936	25	NA	NA	NA	NA	NA	NA	NA	NA	NA	NA	NA	NA	NA	NA	NA	NA	NA	NA	NA	NA	NA	NA	NA
prad_cdk12_mskcc_2020	P-0011092	P-0011092-T02-IM5	prad_cdk12_mskcc_2020:P-0011092-T02-IM5	prad_cdk12_mskcc_2020:P-0011092	0	NO	Prostate Cancer	Prostate Adenocarcinoma	0.0673	IMPACT410	MSKCC	Lymph Node	NA	0.27	Stable	1	PRAD	Prostate	Tumor	1	728	Metastasis	Male	Matched	0.97872	80	NA	NA	NA	NA	NA	NA	NA	NA	NA	NA	NA	NA	NA	NA	NA	NA	NA	NA	NA	NA	NA	NA	NA
prad_cdk12_mskcc_2020	P-0011093	P-0011093-T01-IM5	prad_cdk12_mskcc_2020:P-0011093-T01-IM5	prad_cdk12_mskcc_2020:P-0011093	0	NO	Prostate Cancer	Prostate Adenocarcinoma	0.2086	IMPACT410	MSKCC	Bone	NA	1.14	Stable	2	PRAD	Prostate	Tumor	1	911	Metastasis	Male	Matched	1.95744	10	NA	NA	NA	NA	NA	NA	NA	NA	NA	NA	NA	NA	NA	NA	NA	NA	NA	NA	NA	NA	NA	NA	NA
prad_cdk12_mskcc_2020	P-0011096	P-0011096-T02-IM5	prad_cdk12_mskcc_2020:P-0011096-T02-IM5	prad_cdk12_mskcc_2020:P-0011096	0	NO	Prostate Cancer	Prostate Adenocarcinoma	0.3847	IMPACT410	MSKCC	Brain	MICROSATELLITE STABLE (MSS). See MSI note below.	0.59	Stable	4	PRAD	Prostate	Tumor	1	1008	Metastasis	Male	Matched	3.91488	70	NA	NA	NA	NA	NA	NA	NA	NA	NA	NA	NA	NA	NA	NA	NA	NA	NA	NA	NA	NA	NA	NA	NA
prad_cdk12_mskcc_2020	P-0011156	P-0011156-T01-IM5	prad_cdk12_mskcc_2020:P-0011156-T01-IM5	prad_cdk12_mskcc_2020:P-0011156	0	NO	Prostate Cancer	Prostate Adenocarcinoma	0.0001	IMPACT410	MSKCC	Bone	NA	0	Stable	1	PRAD	Prostate	Tumor	1	1069	Metastasis	Male	Matched	0.97872	50	NA	NA	NA	NA	NA	NA	NA	NA	NA	NA	NA	NA	NA	NA	NA	NA	NA	NA	NA	NA	NA	NA	NA
prad_cdk12_mskcc_2020	P-0011290	P-0011290-T01-IM5	prad_cdk12_mskcc_2020:P-0011290-T01-IM5	prad_cdk12_mskcc_2020:P-0011290	0	NO	Prostate Cancer	Prostate Adenocarcinoma	0.061	IMPACT410	MSKCC	Sacral Mass	MICROSATELLITE STABLE (MSS). See MSI note below.	0.49	Stable	3	PRAD	Prostate	Tumor	1	753	Metastasis	Male	Matched	2.93616	15	NA	NA	NA	NA	NA	NA	NA	NA	NA	NA	NA	NA	NA	NA	NA	NA	NA	NA	NA	NA	NA	NA	NA
prad_cdk12_mskcc_2020	P-0011299	P-0011299-T01-IM5	prad_cdk12_mskcc_2020:P-0011299-T01-IM5	prad_cdk12_mskcc_2020:P-0011299	0	NO	Prostate Cancer	Prostate Adenocarcinoma	0.0304	IMPACT410	MSKCC	Lymph Node	NA	0.09	Stable	2	PRAD	Prostate	Tumor	1	814	Metastasis	Male	Matched	1.95744	60	NA	NA	NA	NA	NA	NA	NA	NA	NA	NA	NA	NA	NA	NA	NA	NA	NA	NA	NA	NA	NA	NA	NA
prad_cdk12_mskcc_2020	P-0011367	P-0011367-T01-IM5	prad_cdk12_mskcc_2020:P-0011367-T01-IM5	prad_cdk12_mskcc_2020:P-0011367	0	NO	Prostate Cancer	Prostate Adenocarcinoma	0.3809	IMPACT410	MSKCC	Bone	NA	0.72	Stable	2	PRAD	Prostate	Tumor	1	1042	Metastasis	Male	Matched	1.95744	80	NA	NA	NA	NA	NA	NA	NA	NA	NA	NA	NA	NA	NA	NA	NA	NA	NA	NA	NA	NA	NA	NA	NA
prad_cdk12_mskcc_2020	P-0011368	P-0011368-T01-IM5	prad_cdk12_mskcc_2020:P-0011368-T01-IM5	prad_cdk12_mskcc_2020:P-0011368	0	NO	Prostate Cancer	Prostate Adenocarcinoma	0.0491	IMPACT410	MSKCC	Pelvis	MICROSATELLITE STABLE (MSS). See MSI note below.	0.17	Stable	3	PRAD	Prostate	Tumor	1	1195	Metastasis	Male	Matched	2.93616	30	NA	NA	NA	NA	NA	NA	NA	NA	NA	NA	NA	NA	NA	NA	NA	NA	NA	NA	NA	NA	NA	NA	NA
prad_cdk12_mskcc_2020	P-0011370	P-0011370-T01-IM5	prad_cdk12_mskcc_2020:P-0011370-T01-IM5	prad_cdk12_mskcc_2020:P-0011370	0	NO	Prostate Cancer	Prostate Adenocarcinoma	0.2776	IMPACT410	MSKCC	Lymph Node	NA	0.71	Stable	1	PRAD	Prostate	Tumor	1	1001	Metastasis	Male	Matched	0.97872	50	NA	NA	NA	NA	NA	NA	NA	NA	NA	NA	NA	NA	NA	NA	NA	NA	NA	NA	NA	NA	NA	NA	NA
prad_cdk12_mskcc_2020	P-0011377	P-0011377-T01-IM5	prad_cdk12_mskcc_2020:P-0011377-T01-IM5	prad_cdk12_mskcc_2020:P-0011377	0	NO	Prostate Cancer	Prostate Adenocarcinoma	0.1621	IMPACT410	MSKCC	Lymph Node	NA	1.03	Stable	4	PRAD	Prostate	Tumor	1	894	Metastasis	Male	Matched	3.91488	70	NA	NA	NA	NA	NA	NA	NA	NA	NA	NA	NA	NA	NA	NA	NA	NA	NA	NA	NA	NA	NA	NA	NA
prad_cdk12_mskcc_2020	P-0011399	P-0011399-T01-IM5	prad_cdk12_mskcc_2020:P-0011399-T01-IM5	prad_cdk12_mskcc_2020:P-0011399	0	NO	Prostate Cancer	Prostate Adenocarcinoma	0.0001	IMPACT410	MSKCC	Lymph Node	NA	0	Stable	1	PRAD	Prostate	Tumor	1	1210	Metastasis	Male	Matched	0.97872	10	NA	NA	NA	NA	NA	NA	NA	NA	NA	NA	NA	NA	NA	NA	NA	NA	NA	NA	NA	NA	NA	NA	NA
prad_cdk12_mskcc_2020	P-0011429	P-0011429-T02-IM6	prad_cdk12_mskcc_2020:P-0011429-T02-IM6	prad_cdk12_mskcc_2020:P-0011429	0	NO	Prostate Cancer	Prostate Adenocarcinoma	0.2629	IMPACT468	MSKCC	Rib	MICROSATELLITE STABLE (MSS). See MSI note below.	0.35	Stable	2	PRAD	Prostate	Tumor	1	844	Metastasis	Male	Matched	1.7294	60	NA	NA	NA	NA	NA	NA	NA	NA	NA	NA	NA	NA	NA	NA	NA	NA	NA	NA	NA	NA	NA	NA	NA
prad_cdk12_mskcc_2020	P-0011437	P-0011437-T01-IM5	prad_cdk12_mskcc_2020:P-0011437-T01-IM5	prad_cdk12_mskcc_2020:P-0011437	0	NO	Prostate Cancer	Prostate Adenocarcinoma	0.0125	IMPACT410	MSKCC	Lymph Node	NA	0.42	Stable	2	PRAD	Prostate	Tumor	1	1204	Metastasis	Male	Matched	1.95744	15	NA	NA	NA	NA	NA	NA	NA	NA	NA	NA	NA	NA	NA	NA	NA	NA	NA	NA	NA	NA	NA	NA	NA
prad_cdk12_mskcc_2020	P-0011475	P-0011475-T01-IM5	prad_cdk12_mskcc_2020:P-0011475-T01-IM5	prad_cdk12_mskcc_2020:P-0011475	0	NO	Prostate Cancer	Prostate Adenocarcinoma	0.0042	IMPACT410	MSKCC	Lymph Node	NA	0.29	Stable	NA	PRAD	Prostate	Tumor	1	859	Metastasis	Male	Matched	0	60	NA	NA	NA	NA	NA	NA	NA	NA	NA	NA	NA	NA	NA	NA	NA	NA	NA	NA	NA	NA	NA	NA	NA
prad_cdk12_mskcc_2020	P-0011483	P-0011483-T01-IM5	prad_cdk12_mskcc_2020:P-0011483-T01-IM5	prad_cdk12_mskcc_2020:P-0011483	0	NO	Prostate Cancer	Prostate Adenocarcinoma	0.2114	IMPACT410	MSKCC	Lung	NA	0.3	Stable	4	PRAD	Prostate	Tumor	1	962	Metastasis	Male	Matched	3.91488	60	NA	NA	NA	NA	NA	NA	NA	NA	NA	NA	NA	NA	NA	NA	NA	NA	NA	NA	NA	NA	NA	NA	NA
prad_cdk12_mskcc_2020	P-0011534	P-0011534-T01-IM5	prad_cdk12_mskcc_2020:P-0011534-T01-IM5	prad_cdk12_mskcc_2020:P-0011534	0	NO	Prostate Cancer	Prostate Adenocarcinoma	0.0262	IMPACT410	MSKCC	Lymph Node	NA	0	Stable	1	PRAD	Prostate	Tumor	1	799	Metastasis	Male	Matched	0.97872	30	NA	NA	NA	NA	NA	NA	NA	NA	NA	NA	NA	NA	NA	NA	NA	NA	NA	NA	NA	NA	NA	NA	NA
prad_cdk12_mskcc_2020	P-0012104	P-0012104-T02-IM6	prad_cdk12_mskcc_2020:P-0012104-T02-IM6	prad_cdk12_mskcc_2020:P-0012104	0	NO	Prostate Cancer	Prostate Adenocarcinoma	0.0343	IMPACT468	MSKCC	Bone	MICROSATELLITE STABLE (MSS). This result is for investigational use only. See MSI note below.	0.28	Stable	5	PRAD	Prostate	Tumor	1	704	Metastasis	Male	Matched	4.32349	70	NA	NA	NA	NA	NA	NA	NA	NA	NA	NA	NA	NA	NA	NA	NA	NA	NA	NA	NA	NA	NA	NA	NA
prad_cdk12_mskcc_2020	P-0012109	P-0012109-T01-IM5	prad_cdk12_mskcc_2020:P-0012109-T01-IM5	prad_cdk12_mskcc_2020:P-0012109	0	NO	Prostate Cancer	Prostate Adenocarcinoma	0.5739	IMPACT410	MSKCC	Liver	NA	2.72	Stable	5	PRAD	Prostate	Tumor	1	1001	Metastasis	Male	Matched	4.8936	60	NA	NA	NA	NA	NA	NA	NA	NA	NA	NA	NA	NA	NA	NA	NA	NA	NA	NA	NA	NA	NA	NA	NA
prad_cdk12_mskcc_2020	P-0012181	P-0012181-T02-IM6	prad_cdk12_mskcc_2020:P-0012181-T02-IM6	prad_cdk12_mskcc_2020:P-0012181	0	NO	Prostate Cancer	Prostate Adenocarcinoma	0.2203	IMPACT468	MSKCC	Lymph Node	NA	0	Do not report	5	PRAD	Prostate	Tumor	1	880	Metastasis	Male	Matched	4.32349	30	NA	NA	NA	NA	NA	NA	NA	NA	NA	NA	NA	NA	NA	NA	NA	NA	NA	NA	NA	NA	NA	NA	NA
prad_cdk12_mskcc_2020	P-0012184	P-0012184-T01-IM5	prad_cdk12_mskcc_2020:P-0012184-T01-IM5	prad_cdk12_mskcc_2020:P-0012184	0	NO	Prostate Cancer	Prostate Adenocarcinoma	0.4017	IMPACT410	MSKCC	Bladder	NA	0.53	Stable	4	PRAD	Prostate	Tumor	1	628	Metastasis	Male	Matched	3.91488	70	NA	NA	NA	NA	NA	NA	NA	NA	NA	NA	NA	NA	NA	NA	NA	NA	NA	NA	NA	NA	NA	NA	NA
prad_cdk12_mskcc_2020	P-0012197	P-0012197-T01-IM5	prad_cdk12_mskcc_2020:P-0012197-T01-IM5	prad_cdk12_mskcc_2020:P-0012197	0	NO	Prostate Cancer	Prostate Adenocarcinoma	0.5714	IMPACT410	MSKCC	Lymph Node	MICROSATELLITE INSTABILITY-INDETERMINATE. See MSI note below.	3.71	Indeterminate	1	PRAD	Prostate	Tumor	1	272	Metastasis	Male	Matched	0.97872	60	NA	NA	NA	NA	NA	NA	NA	NA	NA	NA	NA	NA	NA	NA	NA	NA	NA	NA	NA	NA	NA	NA	NA
prad_cdk12_mskcc_2020	P-0012258	P-0012258-T01-IM5	prad_cdk12_mskcc_2020:P-0012258-T01-IM5	prad_cdk12_mskcc_2020:P-0012258	0	NO	Prostate Cancer	Prostate Adenocarcinoma	0.1771	IMPACT410	MSKCC	Lymph Node	NA	0.08	Stable	3	PRAD	Prostate	Tumor	1	566	Metastasis	Male	Matched	2.93616	50	NA	NA	NA	NA	NA	NA	NA	NA	NA	NA	NA	NA	NA	NA	NA	NA	NA	NA	NA	NA	NA	NA	NA
prad_cdk12_mskcc_2020	P-0012513	P-0012513-T01-IM5	prad_cdk12_mskcc_2020:P-0012513-T01-IM5	prad_cdk12_mskcc_2020:P-0012513	0	NO	Prostate Cancer	Prostate Adenocarcinoma	0.1019	IMPACT410	MSKCC	Lymph Node	NA	0.16	Stable	6	PRAD	Prostate	Tumor	1	772	Metastasis	Male	Matched	5.87232	60	NA	NA	NA	NA	NA	NA	NA	NA	NA	NA	NA	NA	NA	NA	NA	NA	NA	NA	NA	NA	NA	NA	NA
prad_cdk12_mskcc_2020	P-0012555	P-0012555-T01-IM5	prad_cdk12_mskcc_2020:P-0012555-T01-IM5	prad_cdk12_mskcc_2020:P-0012555	0	NO	Prostate Cancer	Prostate Adenocarcinoma	0.1184	IMPACT410	MSKCC	Lymph Node	NA	0.28	Stable	1	PRAD	Prostate	Tumor	1	1036	Metastasis	Male	Matched	0.97872	60	NA	NA	NA	NA	NA	NA	NA	NA	NA	NA	NA	NA	NA	NA	NA	NA	NA	NA	NA	NA	NA	NA	NA
prad_cdk12_mskcc_2020	P-0012643	P-0012643-T01-IM5	prad_cdk12_mskcc_2020:P-0012643-T01-IM5	prad_cdk12_mskcc_2020:P-0012643	0	NO	Prostate Cancer	Prostate Adenocarcinoma	0.4849	IMPACT410	MSKCC	Bone	NA	1.11	Stable	3	PRAD	Prostate	Tumor	1	1015	Metastasis	Male	Matched	2.93616	60	NA	NA	NA	NA	NA	NA	NA	NA	NA	NA	NA	NA	NA	NA	NA	NA	NA	NA	NA	NA	NA	NA	NA
prad_cdk12_mskcc_2020	P-0012669	P-0012669-T02-IM6	prad_cdk12_mskcc_2020:P-0012669-T02-IM6	prad_cdk12_mskcc_2020:P-0012669	0	NO	Prostate Cancer	Prostate Adenocarcinoma	0.1245	IMPACT468	MSKCC	NA	NA	0	Do not report	3	PRAD	Prostate	Tumor	1	743	Metastasis	Male	Matched	2.59409	30	NA	NA	NA	NA	NA	NA	NA	NA	NA	NA	NA	NA	NA	NA	NA	NA	NA	NA	NA	NA	NA	NA	NA
prad_cdk12_mskcc_2020	P-0012675	P-0012675-T02-IM6	prad_cdk12_mskcc_2020:P-0012675-T02-IM6	prad_cdk12_mskcc_2020:P-0012675	0	NO	Prostate Cancer	Prostate Adenocarcinoma	0.1673	IMPACT468	MSKCC	Lymph Node	NA	0.68	Do not report	2	PRAD	Prostate	Tumor	1	849	Metastasis	Male	Matched	1.7294	60	NA	NA	NA	NA	NA	NA	NA	NA	NA	NA	NA	NA	NA	NA	NA	NA	NA	NA	NA	NA	NA	NA	NA
prad_cdk12_mskcc_2020	P-0012711	P-0012711-T01-IM5	prad_cdk12_mskcc_2020:P-0012711-T01-IM5	prad_cdk12_mskcc_2020:P-0012711	0	NO	Prostate Cancer	Prostate Adenocarcinoma	0.1628	IMPACT410	MSKCC	Lung	NA	0	Stable	8	PRAD	Prostate	Tumor	1	866	Metastasis	Male	Matched	7.82976	40	NA	NA	NA	NA	NA	NA	NA	NA	NA	NA	NA	NA	NA	NA	NA	NA	NA	NA	NA	NA	NA	NA	NA
prad_cdk12_mskcc_2020	P-0012834	P-0012834-T02-IM6	prad_cdk12_mskcc_2020:P-0012834-T02-IM6	prad_cdk12_mskcc_2020:P-0012834	0	NO	Prostate Cancer	Prostate Adenocarcinoma	0.2976	IMPACT468	MSKCC	Lymph Node	NA	0	Do not report	4	PRAD	Prostate	Tumor	1	942	Metastasis	Male	Matched	3.45879	30	NA	NA	NA	NA	NA	NA	NA	NA	NA	NA	NA	NA	NA	NA	NA	NA	NA	NA	NA	NA	NA	NA	NA
prad_cdk12_mskcc_2020	P-0012914	P-0012914-T01-IM5	prad_cdk12_mskcc_2020:P-0012914-T01-IM5	prad_cdk12_mskcc_2020:P-0012914	0	NO	Prostate Cancer	Prostate Adenocarcinoma	0.3406	IMPACT410	MSKCC	Right retroperitoneal lymph node	MICROSATELLITE STABLE (MSS). See MSI note below.	1.35	Stable	2	PRAD	Prostate	Tumor	1	1104	Metastasis	Male	Matched	1.95744	80	NA	NA	NA	NA	NA	NA	NA	NA	NA	NA	NA	NA	NA	NA	NA	NA	NA	NA	NA	NA	NA	NA	NA
prad_cdk12_mskcc_2020	P-0012930	P-0012930-T01-IM5	prad_cdk12_mskcc_2020:P-0012930-T01-IM5	prad_cdk12_mskcc_2020:P-0012930	0	NO	Prostate Cancer	Prostate Adenocarcinoma	0.0477	IMPACT410	MSKCC	Lymph Node	MICROSATELLITE STABLE (MSS). See MSI note below.	0.35	Stable	1	PRAD	Prostate	Tumor	1	948	Metastasis	Male	Matched	0.97872	30	NA	NA	NA	NA	NA	NA	NA	NA	NA	NA	NA	NA	NA	NA	NA	NA	NA	NA	NA	NA	NA	NA	NA
prad_cdk12_mskcc_2020	P-0012995	P-0012995-T01-IM5	prad_cdk12_mskcc_2020:P-0012995-T01-IM5	prad_cdk12_mskcc_2020:P-0012995	0	NO	Prostate Cancer	Prostate Adenocarcinoma	0.3063	IMPACT410	MSKCC	Adrenal Gland	MICROSATELLITE STABLE (MSS). See MSI note below.	1.25	Stable	3	PRAD	Prostate	Tumor	1	966	Metastasis	Male	Matched	2.93616	40	NA	NA	NA	NA	NA	NA	NA	NA	NA	NA	NA	NA	NA	NA	NA	NA	NA	NA	NA	NA	NA	NA	NA
prad_cdk12_mskcc_2020	P-0013000	P-0013000-T01-IM5	prad_cdk12_mskcc_2020:P-0013000-T01-IM5	prad_cdk12_mskcc_2020:P-0013000	0	NO	Prostate Cancer	Prostate Adenocarcinoma	0.1712	IMPACT410	MSKCC	Bone	MICROSATELLITE STABLE (MSS). See MSI note below.	0	Stable	5	PRAD	Prostate	Tumor	1	942	Metastasis	Male	Matched	4.8936	40	NA	NA	NA	NA	NA	NA	NA	NA	NA	NA	NA	NA	NA	NA	NA	NA	NA	NA	NA	NA	NA	NA	NA
prad_cdk12_mskcc_2020	P-0013032	P-0013032-T02-IM6	prad_cdk12_mskcc_2020:P-0013032-T02-IM6	prad_cdk12_mskcc_2020:P-0013032	0	NO	Prostate Cancer	Prostate Adenocarcinoma	0.395	IMPACT468	MSKCC	Liver	MICROSATELLITE STABLE (MSS). See MSI note below.	0.31	Stable	8	PRAD	Prostate	Tumor	1	649	Metastasis	Male	Matched	6.91758	60	NA	NA	NA	NA	NA	NA	NA	NA	NA	NA	NA	NA	NA	NA	NA	NA	NA	NA	NA	NA	NA	NA	NA
prad_cdk12_mskcc_2020	P-0013036	P-0013036-T02-IM6	prad_cdk12_mskcc_2020:P-0013036-T02-IM6	prad_cdk12_mskcc_2020:P-0013036	0	NO	Prostate Cancer	Prostate Adenocarcinoma	0.0902	IMPACT468	MSKCC	Iliac Bone	MICROSATELLITE STABLE (MSS). See MSI note below.	0.06	Stable	6	PRAD	Prostate	Tumor	1	464	Metastasis	Male	Matched	5.18819	40	NA	NA	NA	NA	NA	NA	NA	NA	NA	NA	NA	NA	NA	NA	NA	NA	NA	NA	NA	NA	NA	NA	NA
prad_cdk12_mskcc_2020	P-0013115	P-0013115-T01-IM5	prad_cdk12_mskcc_2020:P-0013115-T01-IM5	prad_cdk12_mskcc_2020:P-0013115	0	NO	Prostate Cancer	Prostate Adenocarcinoma	0.2716	IMPACT410	MSKCC	Lung	MICROSATELLITE STABLE (MSS). See MSI note below.	0.76	Stable	6	PRAD	Prostate	Tumor	1	833	Metastasis	Male	Matched	5.87232	80	NA	NA	NA	NA	NA	NA	NA	NA	NA	NA	NA	NA	NA	NA	NA	NA	NA	NA	NA	NA	NA	NA	NA
prad_cdk12_mskcc_2020	P-0013358	P-0013358-T01-IM5	prad_cdk12_mskcc_2020:P-0013358-T01-IM5	prad_cdk12_mskcc_2020:P-0013358	0	NO	Prostate Cancer	Prostate Adenocarcinoma	0.18	IMPACT410	MSKCC	Lymph Node	NA	0.72	Stable	2	PRAD	Prostate	Tumor	1	930	Metastasis	Male	Matched	1.95744	60	NA	NA	NA	NA	NA	NA	NA	NA	NA	NA	NA	NA	NA	NA	NA	NA	NA	NA	NA	NA	NA	NA	NA
prad_cdk12_mskcc_2020	P-0013372	P-0013372-T01-IM5	prad_cdk12_mskcc_2020:P-0013372-T01-IM5	prad_cdk12_mskcc_2020:P-0013372	0	NO	Prostate Cancer	Prostate Adenocarcinoma	0.4387	IMPACT410	MSKCC	Lymph Node	NA	1.43	Stable	1	PRAD	Prostate	Tumor	1	1162	Metastasis	Male	Matched	0.97872	40	NA	NA	NA	NA	NA	NA	NA	NA	NA	NA	NA	NA	NA	NA	NA	NA	NA	NA	NA	NA	NA	NA	NA
prad_cdk12_mskcc_2020	P-0013401	P-0013401-T01-IM5	prad_cdk12_mskcc_2020:P-0013401-T01-IM5	prad_cdk12_mskcc_2020:P-0013401	0	NO	Prostate Cancer	Prostate Adenocarcinoma	0.4296	IMPACT410	MSKCC	Lymph Node	MICROSATELLITE STABLE (MSS). See MSI note below.	1.11	Stable	5	PRAD	Prostate	Tumor	1	1028	Metastasis	Male	Matched	4.8936	70	NA	NA	NA	NA	NA	NA	NA	NA	NA	NA	NA	NA	NA	NA	NA	NA	NA	NA	NA	NA	NA	NA	NA
prad_cdk12_mskcc_2020	P-0013503	P-0013503-T02-IM6	prad_cdk12_mskcc_2020:P-0013503-T02-IM6	prad_cdk12_mskcc_2020:P-0013503	0	NO	Prostate Cancer	Prostate Adenocarcinoma	0.365	IMPACT468	MSKCC	Lymph Node	MICROSATELLITE STABLE (MSS). This result is for investigational use only. See MSI note below.	0.41	Stable	4	PRAD	Prostate	Tumor	1	809	Metastasis	Male	Matched	3.45879	80	NA	NA	NA	NA	NA	NA	NA	NA	NA	NA	NA	NA	NA	NA	NA	NA	NA	NA	NA	NA	NA	NA	NA
prad_cdk12_mskcc_2020	P-0013505	P-0013505-T01-IM5	prad_cdk12_mskcc_2020:P-0013505-T01-IM5	prad_cdk12_mskcc_2020:P-0013505	0	NO	Prostate Cancer	Prostate Adenocarcinoma	0.2013	IMPACT410	MSKCC	Lymph Node	MICROSATELLITE STABLE (MSS). See MSI note below.	0.13	Stable	8	PRAD	Prostate	Tumor	1	1076	Metastasis	Male	Matched	7.82976	30	NA	NA	NA	NA	NA	NA	NA	NA	NA	NA	NA	NA	NA	NA	NA	NA	NA	NA	NA	NA	NA	NA	NA
prad_cdk12_mskcc_2020	P-0013526	P-0013526-T01-IM5	prad_cdk12_mskcc_2020:P-0013526-T01-IM5	prad_cdk12_mskcc_2020:P-0013526	0	NO	Prostate Cancer	Prostate Adenocarcinoma	0.5418	IMPACT410	MSKCC	Bone	NA	0.73	Stable	4	PRAD	Prostate	Tumor	1	767	Metastasis	Male	Matched	3.91488	60	NA	NA	NA	NA	NA	NA	NA	NA	NA	NA	NA	NA	NA	NA	NA	NA	NA	NA	NA	NA	NA	NA	NA
prad_cdk12_mskcc_2020	P-0013671	P-0013671-T01-IM5	prad_cdk12_mskcc_2020:P-0013671-T01-IM5	prad_cdk12_mskcc_2020:P-0013671	0	NO	Prostate Cancer	Prostate Adenocarcinoma	0.0633	IMPACT410	MSKCC	Rectum	NA	5.88	Indeterminate	1	PRAD	Prostate	Tumor	1	92	Metastasis	Male	Matched	0.97872	40	NA	NA	NA	NA	NA	NA	NA	NA	NA	NA	NA	NA	NA	NA	NA	NA	NA	NA	NA	NA	NA	NA	NA
prad_cdk12_mskcc_2020	P-0013674	P-0013674-T01-IM5	prad_cdk12_mskcc_2020:P-0013674-T01-IM5	prad_cdk12_mskcc_2020:P-0013674	0	NO	Prostate Cancer	Prostate Adenocarcinoma	0.1832	IMPACT410	MSKCC	Liver	NA	0.41	Stable	1	PRAD	Prostate	Tumor	1	1062	Metastasis	Male	Matched	0.97872	50	NA	NA	NA	NA	NA	NA	NA	NA	NA	NA	NA	NA	NA	NA	NA	NA	NA	NA	NA	NA	NA	NA	NA
prad_cdk12_mskcc_2020	P-0013681	P-0013681-T01-IM5	prad_cdk12_mskcc_2020:P-0013681-T01-IM5	prad_cdk12_mskcc_2020:P-0013681	0	NO	Prostate Cancer	Prostate Adenocarcinoma	0.1235	IMPACT410	MSKCC	Lung	NA	0.15	Stable	1	PRAD	Prostate	Tumor	1	804	Metastasis	Male	Matched	0.97872	30	NA	NA	NA	NA	NA	NA	NA	NA	NA	NA	NA	NA	NA	NA	NA	NA	NA	NA	NA	NA	NA	NA	NA
prad_cdk12_mskcc_2020	P-0013697	P-0013697-T01-IM5	prad_cdk12_mskcc_2020:P-0013697-T01-IM5	prad_cdk12_mskcc_2020:P-0013697	0	NO	Prostate Cancer	Prostate Adenocarcinoma	0.3446	IMPACT410	MSKCC	Liver	NA	0.96	Stable	4	PRAD	Prostate	Tumor	1	877	Metastasis	Male	Matched	3.91488	60	NA	NA	NA	NA	NA	NA	NA	NA	NA	NA	NA	NA	NA	NA	NA	NA	NA	NA	NA	NA	NA	NA	NA
prad_cdk12_mskcc_2020	P-0013729	P-0013729-T01-IM5	prad_cdk12_mskcc_2020:P-0013729-T01-IM5	prad_cdk12_mskcc_2020:P-0013729	0	NO	Prostate Cancer	Prostate Adenocarcinoma	0.2539	IMPACT410	MSKCC	Lymph Node	MICROSATELLITE STABLE (MSS). See MSI note below.	1.01	Stable	NA	PRAD	Prostate	Tumor	1	862	Metastasis	Male	Matched	0	80	NA	NA	NA	NA	NA	NA	NA	NA	NA	NA	NA	NA	NA	NA	NA	NA	NA	NA	NA	NA	NA	NA	NA
prad_cdk12_mskcc_2020	P-0013732	P-0013732-T01-IM5	prad_cdk12_mskcc_2020:P-0013732-T01-IM5	prad_cdk12_mskcc_2020:P-0013732	0	NO	Prostate Cancer	Prostate Adenocarcinoma	0.4367	IMPACT410	MSKCC	Retroperitoneum	NA	1.88	Stable	5	PRAD	Prostate	Tumor	1	957	Metastasis	Male	Matched	4.8936	20	NA	NA	NA	NA	NA	NA	NA	NA	NA	NA	NA	NA	NA	NA	NA	NA	NA	NA	NA	NA	NA	NA	NA
prad_cdk12_mskcc_2020	P-0013808	P-0013808-T02-IM6	prad_cdk12_mskcc_2020:P-0013808-T02-IM6	prad_cdk12_mskcc_2020:P-0013808	0	NO	Prostate Cancer	Prostate Adenocarcinoma	0.1931	IMPACT468	MSKCC	Lymph Node	MICROSATELLITE STABLE (MSS). See MSI note below.	0.57	Stable	3	PRAD	Prostate	Tumor	1	889	Metastasis	Male	Matched	2.59409	80	NA	NA	NA	NA	NA	NA	NA	NA	NA	NA	NA	NA	NA	NA	NA	NA	NA	NA	NA	NA	NA	NA	NA
prad_cdk12_mskcc_2020	P-0013810	P-0013810-T01-IM5	prad_cdk12_mskcc_2020:P-0013810-T01-IM5	prad_cdk12_mskcc_2020:P-0013810	0	NO	Prostate Cancer	Prostate Adenocarcinoma	0.1965	IMPACT410	MSKCC	Lymph Node	NA	0.45	Do not report	NA	PRAD	Prostate	Tumor	1	1074	Metastasis	Male	Matched	0	50	NA	NA	NA	NA	NA	NA	NA	NA	NA	NA	NA	NA	NA	NA	NA	NA	NA	NA	NA	NA	NA	NA	NA
prad_cdk12_mskcc_2020	P-0013844	P-0013844-T02-IM6	prad_cdk12_mskcc_2020:P-0013844-T02-IM6	prad_cdk12_mskcc_2020:P-0013844	0	NO	Prostate Cancer	Prostate Adenocarcinoma	0.2083	IMPACT468	MSKCC	Retroperitoneum	NA	0.36	Do not report	NA	PRAD	Prostate	Tumor	1	999	Metastasis	Male	Matched	0	30	NA	NA	NA	NA	NA	NA	NA	NA	NA	NA	NA	NA	NA	NA	NA	NA	NA	NA	NA	NA	NA	NA	NA
prad_cdk12_mskcc_2020	P-0013858	P-0013858-T01-IM5	prad_cdk12_mskcc_2020:P-0013858-T01-IM5	prad_cdk12_mskcc_2020:P-0013858	0	NO	Prostate Cancer	Prostate Adenocarcinoma	0.1982	IMPACT410	MSKCC	Bone	NA	0.67	Do not report	5	PRAD	Prostate	Tumor	1	885	Metastasis	Male	Matched	4.8936	30	NA	NA	NA	NA	NA	NA	NA	NA	NA	NA	NA	NA	NA	NA	NA	NA	NA	NA	NA	NA	NA	NA	NA
prad_cdk12_mskcc_2020	P-0013865	P-0013865-T02-IM6	prad_cdk12_mskcc_2020:P-0013865-T02-IM6	prad_cdk12_mskcc_2020:P-0013865	0	NO	Prostate Cancer	Prostate Adenocarcinoma	0.4298	IMPACT468	MSKCC	Lymph Node	MICROSATELLITE STABLE (MSS). This result is for investigational use only. See MSI note below.	1.24	Stable	1	PRAD	Prostate	Tumor	1	1144	Metastasis	Male	Matched	0.864698	80	NA	NA	NA	NA	NA	NA	NA	NA	NA	NA	NA	NA	NA	NA	NA	NA	NA	NA	NA	NA	NA	NA	NA
prad_cdk12_mskcc_2020	P-0014004	P-0014004-T01-IM5	prad_cdk12_mskcc_2020:P-0014004-T01-IM5	prad_cdk12_mskcc_2020:P-0014004	0	NO	Prostate Cancer	Prostate Adenocarcinoma	0.6005	IMPACT410	MSKCC	Lymph Node	NA	2.32	Do not report	3	PRAD	Prostate	Tumor	1	936	Metastasis	Male	Matched	2.93616	80	NA	NA	NA	NA	NA	NA	NA	NA	NA	NA	NA	NA	NA	NA	NA	NA	NA	NA	NA	NA	NA	NA	NA
prad_cdk12_mskcc_2020	P-0014009	P-0014009-T01-IM5	prad_cdk12_mskcc_2020:P-0014009-T01-IM5	prad_cdk12_mskcc_2020:P-0014009	0	NO	Prostate Cancer	Prostate Adenocarcinoma	0.3662	IMPACT410	MSKCC	Lymph Node	NA	1.38	Do not report	5	PRAD	Prostate	Tumor	1	900	Metastasis	Male	Matched	4.8936	50	NA	NA	NA	NA	NA	NA	NA	NA	NA	NA	NA	NA	NA	NA	NA	NA	NA	NA	NA	NA	NA	NA	NA
prad_cdk12_mskcc_2020	P-0014076	P-0014076-T01-IM5	prad_cdk12_mskcc_2020:P-0014076-T01-IM5	prad_cdk12_mskcc_2020:P-0014076	0	NO	Prostate Cancer	Prostate Adenocarcinoma	0.1893	IMPACT410	MSKCC	Lymph Node	NA	0.46	Stable	6	PRAD	Prostate	Tumor	1	1194	Metastasis	Male	Matched	5.87232	40	NA	NA	NA	NA	NA	NA	NA	NA	NA	NA	NA	NA	NA	NA	NA	NA	NA	NA	NA	NA	NA	NA	NA
prad_cdk12_mskcc_2020	P-0014204	P-0014204-T01-IM6	prad_cdk12_mskcc_2020:P-0014204-T01-IM6	prad_cdk12_mskcc_2020:P-0014204	0	NO	Prostate Cancer	Prostate Adenocarcinoma	0.3373	IMPACT468	MSKCC	Omentum	NA	1.13	Do not report	3	PRAD	Prostate	Tumor	1	903	Metastasis	Male	Matched	2.59409	70	NA	NA	NA	NA	NA	NA	NA	NA	NA	NA	NA	NA	NA	NA	NA	NA	NA	NA	NA	NA	NA	NA	NA
prad_cdk12_mskcc_2020	P-0014235	P-0014235-T01-IM6	prad_cdk12_mskcc_2020:P-0014235-T01-IM6	prad_cdk12_mskcc_2020:P-0014235	0	NO	Prostate Cancer	Prostate Adenocarcinoma	0.4273	IMPACT468	MSKCC	Soft Tissue	NA	1.03	Do not report	7	PRAD	Prostate	Tumor	1	885	Metastasis	Male	Matched	6.05289	30	NA	NA	NA	NA	NA	NA	NA	NA	NA	NA	NA	NA	NA	NA	NA	NA	NA	NA	NA	NA	NA	NA	NA
prad_cdk12_mskcc_2020	P-0014254	P-0014254-T02-IM6	prad_cdk12_mskcc_2020:P-0014254-T02-IM6	prad_cdk12_mskcc_2020:P-0014254	0	NO	Prostate Cancer	Prostate Adenocarcinoma	0.2636	IMPACT468	MSKCC	Pelvis	NA	0.54	Do not report	1	PRAD	Prostate	Tumor	1	1209	Metastasis	Male	Matched	0.864698	60	NA	NA	NA	NA	NA	NA	NA	NA	NA	NA	NA	NA	NA	NA	NA	NA	NA	NA	NA	NA	NA	NA	NA
prad_cdk12_mskcc_2020	P-0014333	P-0014333-T02-IM6	prad_cdk12_mskcc_2020:P-0014333-T02-IM6	prad_cdk12_mskcc_2020:P-0014333	0	NO	Prostate Cancer	Prostate Adenocarcinoma	0.6006	IMPACT468	MSKCC	Liver	MICROSATELLITE STABLE (MSS). This result is for investigational use only. See MSI note below.	1.83	Stable	3	PRAD	Prostate	Tumor	1	988	Metastasis	Male	Matched	2.59409	50	NA	NA	NA	NA	NA	NA	NA	NA	NA	NA	NA	NA	NA	NA	NA	NA	NA	NA	NA	NA	NA	NA	NA
prad_cdk12_mskcc_2020	P-0014403	P-0014403-T01-IM6	prad_cdk12_mskcc_2020:P-0014403-T01-IM6	prad_cdk12_mskcc_2020:P-0014403	0	NO	Prostate Cancer	Prostate Adenocarcinoma	0.0882	IMPACT468	MSKCC	Soft Tissue	NA	0.16	Do not report	NA	PRAD	Prostate	Tumor	1	100	Metastasis	Male	Matched	0	20	NA	NA	NA	NA	NA	NA	NA	NA	NA	NA	NA	NA	NA	NA	NA	NA	NA	NA	NA	NA	NA	NA	NA
prad_cdk12_mskcc_2020	P-0014408	P-0014408-T01-IM6	prad_cdk12_mskcc_2020:P-0014408-T01-IM6	prad_cdk12_mskcc_2020:P-0014408	0	NO	Prostate Cancer	Prostate Adenocarcinoma	0.2376	IMPACT468	MSKCC	Liver	NA	1.42	Do not report	6	PRAD	Prostate	Tumor	1	1103	Metastasis	Male	Matched	5.18819	50	NA	NA	NA	NA	NA	NA	NA	NA	NA	NA	NA	NA	NA	NA	NA	NA	NA	NA	NA	NA	NA	NA	NA
prad_cdk12_mskcc_2020	P-0014523	P-0014523-T01-IM6	prad_cdk12_mskcc_2020:P-0014523-T01-IM6	prad_cdk12_mskcc_2020:P-0014523	0	NO	Prostate Cancer	Prostate Adenocarcinoma	0.3328	IMPACT468	MSKCC	Lymph Node	NA	0.48	Do not report	6	PRAD	Prostate	Tumor	1	688	Metastasis	Male	Matched	5.18819	40	NA	NA	NA	NA	NA	NA	NA	NA	NA	NA	NA	NA	NA	NA	NA	NA	NA	NA	NA	NA	NA	NA	NA
prad_cdk12_mskcc_2020	P-0014530	P-0014530-T01-IM6	prad_cdk12_mskcc_2020:P-0014530-T01-IM6	prad_cdk12_mskcc_2020:P-0014530	0	NO	Prostate Cancer	Prostate Adenocarcinoma	0.0022	IMPACT468	MSKCC	Rectum	NA	0.07	Do not report	4	PRAD	Prostate	Tumor	1	840	Metastasis	Male	Matched	3.45879	10	NA	NA	NA	NA	NA	NA	NA	NA	NA	NA	NA	NA	NA	NA	NA	NA	NA	NA	NA	NA	NA	NA	NA
prad_cdk12_mskcc_2020	P-0014566	P-0014566-T01-IM6	prad_cdk12_mskcc_2020:P-0014566-T01-IM6	prad_cdk12_mskcc_2020:P-0014566	0	NO	Prostate Cancer	Prostate Adenocarcinoma	0.1646	IMPACT468	MSKCC	Retroperitoneum	NA	0	Do not report	7	PRAD	Prostate	Tumor	1	1203	Metastasis	Male	Matched	6.05289	40	NA	NA	NA	NA	NA	NA	NA	NA	NA	NA	NA	NA	NA	NA	NA	NA	NA	NA	NA	NA	NA	NA	NA
prad_cdk12_mskcc_2020	P-0014571	P-0014571-T01-IM6	prad_cdk12_mskcc_2020:P-0014571-T01-IM6	prad_cdk12_mskcc_2020:P-0014571	0	NO	Prostate Cancer	Prostate Adenocarcinoma	0.4335	IMPACT468	MSKCC	Lymph node	NA	0.21	Do not report	5	PRAD	Prostate	Tumor	1	927	Metastasis	Male	Matched	4.32349	50	NA	NA	NA	NA	NA	NA	NA	NA	NA	NA	NA	NA	NA	NA	NA	NA	NA	NA	NA	NA	NA	NA	NA
prad_cdk12_mskcc_2020	P-0014598	P-0014598-T01-IM6	prad_cdk12_mskcc_2020:P-0014598-T01-IM6	prad_cdk12_mskcc_2020:P-0014598	0	NO	Prostate Cancer	Prostate Adenocarcinoma	0.1242	IMPACT468	MSKCC	Bone	NA	0.12	Do not report	3	PRAD	Prostate	Tumor	1	729	Metastasis	Male	Matched	2.59409	10	NA	NA	NA	NA	NA	NA	NA	NA	NA	NA	NA	NA	NA	NA	NA	NA	NA	NA	NA	NA	NA	NA	NA
prad_cdk12_mskcc_2020	P-0014613	P-0014613-T01-IM6	prad_cdk12_mskcc_2020:P-0014613-T01-IM6	prad_cdk12_mskcc_2020:P-0014613	0	NO	Prostate Cancer	Prostate Adenocarcinoma	0.246	IMPACT468	MSKCC	Adrenal	NA	0.65	Do not report	3	PRAD	Prostate	Tumor	1	802	Metastasis	Male	Matched	2.59409	50	NA	NA	NA	NA	NA	NA	NA	NA	NA	NA	NA	NA	NA	NA	NA	NA	NA	NA	NA	NA	NA	NA	NA
prad_cdk12_mskcc_2020	P-0014629	P-0014629-T01-IM6	prad_cdk12_mskcc_2020:P-0014629-T01-IM6	prad_cdk12_mskcc_2020:P-0014629	0	NO	Prostate Cancer	Prostate Adenocarcinoma	0.1918	IMPACT468	MSKCC	Bone	NA	0.21	Do not report	3	PRAD	Prostate	Tumor	1	704	Metastasis	Male	Matched	2.59409	20	NA	NA	NA	NA	NA	NA	NA	NA	NA	NA	NA	NA	NA	NA	NA	NA	NA	NA	NA	NA	NA	NA	NA
prad_cdk12_mskcc_2020	P-0014689	P-0014689-T02-IM6	prad_cdk12_mskcc_2020:P-0014689-T02-IM6	prad_cdk12_mskcc_2020:P-0014689	0	NO	Prostate Cancer	Prostate Adenocarcinoma	0.3596	IMPACT468	MSKCC	Bone	MICROSATELLITE STABLE (MSS). See MSI note below.	0.3	Stable	1	PRAD	Prostate	Tumor	1	253	Metastasis	Male	Matched	0.864698	40	NA	NA	NA	NA	NA	NA	NA	NA	NA	NA	NA	NA	NA	NA	NA	NA	NA	NA	NA	NA	NA	NA	NA
prad_cdk12_mskcc_2020	P-0014701	P-0014701-T01-IM6	prad_cdk12_mskcc_2020:P-0014701-T01-IM6	prad_cdk12_mskcc_2020:P-0014701	0	NO	Prostate Cancer	Prostate Adenocarcinoma	0.1109	IMPACT468	MSKCC	Lymph node	NA	0.24	Do not report	4	PRAD	Prostate	Tumor	1	1104	Metastasis	Male	Matched	3.45879	50	NA	NA	NA	NA	NA	NA	NA	NA	NA	NA	NA	NA	NA	NA	NA	NA	NA	NA	NA	NA	NA	NA	NA
prad_cdk12_mskcc_2020	P-0014841	P-0014841-T01-IM6	prad_cdk12_mskcc_2020:P-0014841-T01-IM6	prad_cdk12_mskcc_2020:P-0014841	0	NO	Prostate Cancer	Prostate Adenocarcinoma	0.1499	IMPACT468	MSKCC	Lymph node	NA	0.58	Do not report	1	PRAD	Prostate	Tumor	1	810	Metastasis	Male	Matched	0.864698	60	NA	NA	NA	NA	NA	NA	NA	NA	NA	NA	NA	NA	NA	NA	NA	NA	NA	NA	NA	NA	NA	NA	NA
prad_cdk12_mskcc_2020	P-0015064	P-0015064-T01-IM6	prad_cdk12_mskcc_2020:P-0015064-T01-IM6	prad_cdk12_mskcc_2020:P-0015064	0	NO	Prostate Cancer	Prostate Adenocarcinoma	0.1715	IMPACT468	MSKCC	Lymph Node	NA	0.15	Do not report	4	PRAD	Prostate	Tumor	1	692	Metastasis	Male	Matched	3.45879	20	NA	NA	NA	NA	NA	NA	NA	NA	NA	NA	NA	NA	NA	NA	NA	NA	NA	NA	NA	NA	NA	NA	NA
prad_cdk12_mskcc_2020	P-0015070	P-0015070-T01-IM6	prad_cdk12_mskcc_2020:P-0015070-T01-IM6	prad_cdk12_mskcc_2020:P-0015070	0	NO	Prostate Cancer	Prostate Adenocarcinoma	0.0949	IMPACT468	MSKCC	Sacral Mass	NA	0.15	Do not report	5	PRAD	Prostate	Tumor	1	698	Metastasis	Male	Matched	4.32349	20	NA	NA	NA	NA	NA	NA	NA	NA	NA	NA	NA	NA	NA	NA	NA	NA	NA	NA	NA	NA	NA	NA	NA
prad_cdk12_mskcc_2020	P-0015102	P-0015102-T01-IM6	prad_cdk12_mskcc_2020:P-0015102-T01-IM6	prad_cdk12_mskcc_2020:P-0015102	0	NO	Prostate Cancer	Prostate Adenocarcinoma	0.2129	IMPACT468	MSKCC	Lymph Node	NA	0.12	Do not report	4	PRAD	Prostate	Tumor	1	807	Metastasis	Male	Matched	3.45879	50	NA	NA	NA	NA	NA	NA	NA	NA	NA	NA	NA	NA	NA	NA	NA	NA	NA	NA	NA	NA	NA	NA	NA
prad_cdk12_mskcc_2020	P-0015206	P-0015206-T02-IM6	prad_cdk12_mskcc_2020:P-0015206-T02-IM6	prad_cdk12_mskcc_2020:P-0015206	0	NO	Prostate Cancer	Prostate Adenocarcinoma	0.1676	IMPACT468	MSKCC	Bone	MICROSATELLITE STABLE (MSS). See MSI note below.	0.06	Stable	10	PRAD	Prostate	Tumor	1	424	Metastasis	Male	Matched	8.64698	30	NA	NA	NA	NA	NA	NA	NA	NA	NA	NA	NA	NA	NA	NA	NA	NA	NA	NA	NA	NA	NA	NA	NA
prad_cdk12_mskcc_2020	P-0015209	P-0015209-T01-IM6	prad_cdk12_mskcc_2020:P-0015209-T01-IM6	prad_cdk12_mskcc_2020:P-0015209	0	NO	Prostate Cancer	Prostate Adenocarcinoma	0.1451	IMPACT468	MSKCC	Lymph node	NA	0	Do not report	3	PRAD	Prostate	Tumor	1	809	Metastasis	Male	Matched	2.59409	30	NA	NA	NA	NA	NA	NA	NA	NA	NA	NA	NA	NA	NA	NA	NA	NA	NA	NA	NA	NA	NA	NA	NA
prad_cdk12_mskcc_2020	P-0015211	P-0015211-T01-IM6	prad_cdk12_mskcc_2020:P-0015211-T01-IM6	prad_cdk12_mskcc_2020:P-0015211	0	NO	Prostate Cancer	Prostate Adenocarcinoma	0.1926	IMPACT468	MSKCC	Bone	NA	6.83	Do not report	16	PRAD	Prostate	Tumor	1	782	Metastasis	Male	Matched	13.8352	40	NA	NA	NA	NA	NA	NA	NA	NA	NA	NA	NA	NA	NA	NA	NA	NA	NA	NA	NA	NA	NA	NA	NA
prad_cdk12_mskcc_2020	P-0015239	P-0015239-T01-IM6	prad_cdk12_mskcc_2020:P-0015239-T01-IM6	prad_cdk12_mskcc_2020:P-0015239	0	NO	Prostate Cancer	Prostate Adenocarcinoma	0.0944	IMPACT468	MSKCC	Soft Tissue Back	NA	0.37	Do not report	3	PRAD	Prostate	Tumor	1	607	Metastasis	Male	Matched	2.59409	50	NA	NA	NA	NA	NA	NA	NA	NA	NA	NA	NA	NA	NA	NA	NA	NA	NA	NA	NA	NA	NA	NA	NA
prad_cdk12_mskcc_2020	P-0015345	P-0015345-T01-IM6	prad_cdk12_mskcc_2020:P-0015345-T01-IM6	prad_cdk12_mskcc_2020:P-0015345	0	YES	Prostate Cancer	Prostate Adenocarcinoma	0.1033	IMPACT468	MSKCC	Lymph Node	NA	0.51	Do not report	5	PRAD	Prostate	Tumor	1	929	Metastasis	Male	Matched	4.32349	70	NA	NA	NA	NA	NA	NA	NA	NA	NA	NA	NA	NA	NA	NA	NA	NA	NA	NA	NA	NA	NA	NA	NA
prad_cdk12_mskcc_2020	P-0015479	P-0015479-T01-IM6	prad_cdk12_mskcc_2020:P-0015479-T01-IM6	prad_cdk12_mskcc_2020:P-0015479	0	NO	Prostate Cancer	Prostate Adenocarcinoma	0.0524	IMPACT468	MSKCC	Lung	NA	0	Do not report	1	PRAD	Prostate	Tumor	1	454	Metastasis	Male	Matched	0.864698	10	NA	NA	NA	NA	NA	NA	NA	NA	NA	NA	NA	NA	NA	NA	NA	NA	NA	NA	NA	NA	NA	NA	NA
prad_cdk12_mskcc_2020	P-0015547	P-0015547-T01-IM6	prad_cdk12_mskcc_2020:P-0015547-T01-IM6	prad_cdk12_mskcc_2020:P-0015547	0	NO	Prostate Cancer	Prostate Adenocarcinoma	0.0006	IMPACT468	MSKCC	Sacral Mass	NA	0.05	Do not report	1	PRAD	Prostate	Tumor	1	724	Metastasis	Male	Matched	0.864698	20	NA	NA	NA	NA	NA	NA	NA	NA	NA	NA	NA	NA	NA	NA	NA	NA	NA	NA	NA	NA	NA	NA	NA
prad_cdk12_mskcc_2020	P-0015618	P-0015618-T01-IM6	prad_cdk12_mskcc_2020:P-0015618-T01-IM6	prad_cdk12_mskcc_2020:P-0015618	0	NO	Prostate Cancer	Prostate Adenocarcinoma	0.3547	IMPACT468	MSKCC	Bone	NA	0.28	Do not report	7	PRAD	Prostate	Tumor	1	896	Metastasis	Male	Matched	6.05289	20	NA	NA	NA	NA	NA	NA	NA	NA	NA	NA	NA	NA	NA	NA	NA	NA	NA	NA	NA	NA	NA	NA	NA
prad_cdk12_mskcc_2020	P-0015628	P-0015628-T01-IM6	prad_cdk12_mskcc_2020:P-0015628-T01-IM6	prad_cdk12_mskcc_2020:P-0015628	0	NO	Prostate Cancer	Prostate Adenocarcinoma	0.3927	IMPACT468	MSKCC	Liver	NA	0.98	Do not report	5	PRAD	Prostate	Tumor	1	942	Metastasis	Male	Matched	4.32349	30	NA	NA	NA	NA	NA	NA	NA	NA	NA	NA	NA	NA	NA	NA	NA	NA	NA	NA	NA	NA	NA	NA	NA
prad_cdk12_mskcc_2020	P-0015925	P-0015925-T02-IM6	prad_cdk12_mskcc_2020:P-0015925-T02-IM6	prad_cdk12_mskcc_2020:P-0015925	0	NO	Prostate Cancer	Prostate Adenocarcinoma	0.2541	IMPACT468	MSKCC	Liver	MICROSATELLITE STABLE (MSS). See MSI note below.	0.52	Stable	2	PRAD	Prostate	Tumor	1	692	Metastasis	Male	Matched	1.7294	50	NA	NA	NA	NA	NA	NA	NA	NA	NA	NA	NA	NA	NA	NA	NA	NA	NA	NA	NA	NA	NA	NA	NA
prad_cdk12_mskcc_2020	P-0015960	P-0015960-T02-IM6	prad_cdk12_mskcc_2020:P-0015960-T02-IM6	prad_cdk12_mskcc_2020:P-0015960	0	NO	Prostate Cancer	Prostate Adenocarcinoma	0.4339	IMPACT468	MSKCC	Bone	MICROSATELLITE STABLE (MSS). See MSI note below.	0.42	Stable	4	PRAD	Prostate	Tumor	1	431	Metastasis	Male	Matched	3.45879	40	NA	NA	NA	NA	NA	NA	NA	NA	NA	NA	NA	NA	NA	NA	NA	NA	NA	NA	NA	NA	NA	NA	NA
prad_cdk12_mskcc_2020	P-0015962	P-0015962-T01-IM6	prad_cdk12_mskcc_2020:P-0015962-T01-IM6	prad_cdk12_mskcc_2020:P-0015962	0	NO	Prostate Cancer	Prostate Adenocarcinoma	0.3342	IMPACT468	MSKCC	Lymph Node	NA	0.34	Do not report	4	PRAD	Prostate	Tumor	1	853	Metastasis	Male	Matched	3.45879	40	NA	NA	NA	NA	NA	NA	NA	NA	NA	NA	NA	NA	NA	NA	NA	NA	NA	NA	NA	NA	NA	NA	NA
prad_cdk12_mskcc_2020	P-0015991	P-0015991-T01-IM6	prad_cdk12_mskcc_2020:P-0015991-T01-IM6	prad_cdk12_mskcc_2020:P-0015991	0	NO	Prostate Cancer	Prostate Adenocarcinoma	0.1737	IMPACT468	MSKCC	Spine (Bone)	NA	0.25	Do not report	5	PRAD	Prostate	Tumor	1	835	Metastasis	Male	Matched	4.32349	30	NA	NA	NA	NA	NA	NA	NA	NA	NA	NA	NA	NA	NA	NA	NA	NA	NA	NA	NA	NA	NA	NA	NA
prad_cdk12_mskcc_2020	P-0016117	P-0016117-T01-IM6	prad_cdk12_mskcc_2020:P-0016117-T01-IM6	prad_cdk12_mskcc_2020:P-0016117	0	NO	Prostate Cancer	Prostate Adenocarcinoma	0.257	IMPACT468	MSKCC	Colon	NA	0.35	Do not report	5	PRAD	Prostate	Tumor	1	606	Metastasis	Male	Matched	4.32349	80	NA	NA	NA	NA	NA	NA	NA	NA	NA	NA	NA	NA	NA	NA	NA	NA	NA	NA	NA	NA	NA	NA	NA
prad_cdk12_mskcc_2020	P-0016288	P-0016288-T01-IM6	prad_cdk12_mskcc_2020:P-0016288-T01-IM6	prad_cdk12_mskcc_2020:P-0016288	0	NO	Prostate Cancer	Prostate Adenocarcinoma	0.2974	IMPACT468	MSKCC	Liver	NA	0.18	Do not report	7	PRAD	Prostate	Tumor	1	907	Metastasis	Male	Matched	6.05289	30	NA	NA	NA	NA	NA	NA	NA	NA	NA	NA	NA	NA	NA	NA	NA	NA	NA	NA	NA	NA	NA	NA	NA
prad_cdk12_mskcc_2020	P-0016296	P-0016296-T01-IM6	prad_cdk12_mskcc_2020:P-0016296-T01-IM6	prad_cdk12_mskcc_2020:P-0016296	0	NO	Prostate Cancer	Prostate Adenocarcinoma	0.1895	IMPACT468	MSKCC	Bladder	NA	0	Do not report	4	PRAD	Prostate	Tumor	1	741	Metastasis	Male	Matched	3.45879	20	NA	NA	NA	NA	NA	NA	NA	NA	NA	NA	NA	NA	NA	NA	NA	NA	NA	NA	NA	NA	NA	NA	NA
prad_cdk12_mskcc_2020	P-0016307	P-0016307-T01-IM6	prad_cdk12_mskcc_2020:P-0016307-T01-IM6	prad_cdk12_mskcc_2020:P-0016307	0	NO	Prostate Cancer	Prostate Adenocarcinoma	0.2394	IMPACT468	MSKCC	Lymph Node	NA	0	Do not report	3	PRAD	Prostate	Tumor	1	955	Metastasis	Male	Matched	2.59409	40	NA	NA	NA	NA	NA	NA	NA	NA	NA	NA	NA	NA	NA	NA	NA	NA	NA	NA	NA	NA	NA	NA	NA
prad_cdk12_mskcc_2020	P-0016325	P-0016325-T01-IM6	prad_cdk12_mskcc_2020:P-0016325-T01-IM6	prad_cdk12_mskcc_2020:P-0016325	0	NO	Prostate Cancer	Prostate Adenocarcinoma	0.0904	IMPACT468	MSKCC	Lymph Node	NA	0.52	Do not report	4	PRAD	Prostate	Tumor	1	899	Metastasis	Male	Matched	2.59409	50	NA	NA	NA	NA	NA	NA	NA	NA	NA	NA	NA	NA	NA	NA	NA	NA	NA	NA	NA	NA	NA	NA	NA
prad_cdk12_mskcc_2020	P-0016396	P-0016396-T01-IM6	prad_cdk12_mskcc_2020:P-0016396-T01-IM6	prad_cdk12_mskcc_2020:P-0016396	0	NO	Prostate Cancer	Prostate Adenocarcinoma	0.1295	IMPACT468	MSKCC	Pelvis	NA	0.57	Do not report	2	PRAD	Prostate	Tumor	1	893	Metastasis	Male	Matched	1.7294	60	NA	NA	NA	NA	NA	NA	NA	NA	NA	NA	NA	NA	NA	NA	NA	NA	NA	NA	NA	NA	NA	NA	NA
prad_cdk12_mskcc_2020	P-0016405	P-0016405-T01-IM6	prad_cdk12_mskcc_2020:P-0016405-T01-IM6	prad_cdk12_mskcc_2020:P-0016405	0	NO	Prostate Cancer	Prostate Adenocarcinoma	0.1982	IMPACT468	MSKCC	Bladder	NA	0.41	Do not report	1	PRAD	Prostate	Tumor	1	709	Metastasis	Male	Matched	0.864698	50	NA	NA	NA	NA	NA	NA	NA	NA	NA	NA	NA	NA	NA	NA	NA	NA	NA	NA	NA	NA	NA	NA	NA
prad_cdk12_mskcc_2020	P-0016446	P-0016446-T01-IM6	prad_cdk12_mskcc_2020:P-0016446-T01-IM6	prad_cdk12_mskcc_2020:P-0016446	0	NO	Prostate Cancer	Prostate Adenocarcinoma	0.4072	IMPACT468	MSKCC	Mediastinum	NA	1.33	Do not report	5	PRAD	Prostate	Tumor	1	372	Metastasis	Male	Matched	4.32349	80	NA	NA	NA	NA	NA	NA	NA	NA	NA	NA	NA	NA	NA	NA	NA	NA	NA	NA	NA	NA	NA	NA	NA
prad_cdk12_mskcc_2020	P-0016450	P-0016450-T01-IM6	prad_cdk12_mskcc_2020:P-0016450-T01-IM6	prad_cdk12_mskcc_2020:P-0016450	0	NO	Prostate Cancer	Prostate Adenocarcinoma	0.3099	IMPACT468	MSKCC	Lymph Node	NA	1.02	Do not report	1	PRAD	Prostate	Tumor	1	770	Metastasis	Male	Matched	0.864698	60	NA	NA	NA	NA	NA	NA	NA	NA	NA	NA	NA	NA	NA	NA	NA	NA	NA	NA	NA	NA	NA	NA	NA
prad_cdk12_mskcc_2020	P-0016490	P-0016490-T01-IM6	prad_cdk12_mskcc_2020:P-0016490-T01-IM6	prad_cdk12_mskcc_2020:P-0016490	0	NO	Prostate Cancer	Prostate Adenocarcinoma	0.0006	IMPACT468	MSKCC	Lymph Node	NA	0	Do not report	1	PRAD	Prostate	Tumor	1	973	Metastasis	Male	Matched	0.864698	10	NA	NA	NA	NA	NA	NA	NA	NA	NA	NA	NA	NA	NA	NA	NA	NA	NA	NA	NA	NA	NA	NA	NA
prad_cdk12_mskcc_2020	P-0016534	P-0016534-T01-IM6	prad_cdk12_mskcc_2020:P-0016534-T01-IM6	prad_cdk12_mskcc_2020:P-0016534	0	NO	Prostate Cancer	Prostate Adenocarcinoma	0.0555	IMPACT468	MSKCC	Lymph Node	NA	0	Do not report	1	PRAD	Prostate	Tumor	1	766	Metastasis	Male	Matched	0.864698	10	NA	NA	NA	NA	NA	NA	NA	NA	NA	NA	NA	NA	NA	NA	NA	NA	NA	NA	NA	NA	NA	NA	NA
prad_cdk12_mskcc_2020	P-0016538	P-0016538-T01-IM6	prad_cdk12_mskcc_2020:P-0016538-T01-IM6	prad_cdk12_mskcc_2020:P-0016538	0	NO	Prostate Cancer	Prostate Adenocarcinoma	0.1862	IMPACT468	MSKCC	Lymph Node	NA	0.47	Do not report	7	PRAD	Prostate	Tumor	1	1150	Metastasis	Male	Matched	6.05289	10	NA	NA	NA	NA	NA	NA	NA	NA	NA	NA	NA	NA	NA	NA	NA	NA	NA	NA	NA	NA	NA	NA	NA
prad_cdk12_mskcc_2020	P-0016548	P-0016548-T01-IM6	prad_cdk12_mskcc_2020:P-0016548-T01-IM6	prad_cdk12_mskcc_2020:P-0016548	0	NO	Prostate Cancer	Prostate Adenocarcinoma	0.262	IMPACT468	MSKCC	Bone	NA	0.36	Do not report	2	PRAD	Prostate	Tumor	1	795	Metastasis	Male	Matched	1.7294	30	NA	NA	NA	NA	NA	NA	NA	NA	NA	NA	NA	NA	NA	NA	NA	NA	NA	NA	NA	NA	NA	NA	NA
prad_cdk12_mskcc_2020	P-0016768	P-0016768-T01-IM6	prad_cdk12_mskcc_2020:P-0016768-T01-IM6	prad_cdk12_mskcc_2020:P-0016768	0	NO	Prostate Cancer	Prostate Adenocarcinoma	0.4359	IMPACT468	MSKCC	Iliac Bone	NA	0.68	Do not report	10	PRAD	Prostate	Tumor	1	319	Metastasis	Male	Matched	8.64698	50	NA	NA	NA	NA	NA	NA	NA	NA	NA	NA	NA	NA	NA	NA	NA	NA	NA	NA	NA	NA	NA	NA	NA
prad_cdk12_mskcc_2020	P-0016812	P-0016812-T01-IM6	prad_cdk12_mskcc_2020:P-0016812-T01-IM6	prad_cdk12_mskcc_2020:P-0016812	0	NO	Prostate Cancer	Prostate Adenocarcinoma	0.3236	IMPACT468	MSKCC	Lymph Node	NA	0.78	Do not report	4	PRAD	Prostate	Tumor	1	922	Metastasis	Male	Matched	3.45879	60	NA	NA	NA	NA	NA	NA	NA	NA	NA	NA	NA	NA	NA	NA	NA	NA	NA	NA	NA	NA	NA	NA	NA
prad_cdk12_mskcc_2020	P-0016883	P-0016883-T01-IM6	prad_cdk12_mskcc_2020:P-0016883-T01-IM6	prad_cdk12_mskcc_2020:P-0016883	0	NO	Prostate Cancer	Prostate Adenocarcinoma	0.2093	IMPACT468	MSKCC	Lymph Node	NA	1.06	Do not report	3	PRAD	Prostate	Tumor	1	954	Metastasis	Male	Matched	2.59409	50	NA	NA	NA	NA	NA	NA	NA	NA	NA	NA	NA	NA	NA	NA	NA	NA	NA	NA	NA	NA	NA	NA	NA
prad_cdk12_mskcc_2020	P-0016895	P-0016895-T01-IM6	prad_cdk12_mskcc_2020:P-0016895-T01-IM6	prad_cdk12_mskcc_2020:P-0016895	0	NO	Prostate Cancer	Prostate Adenocarcinoma	0.028	IMPACT468	MSKCC	Soft Tissue	NA	0	Do not report	3	PRAD	Prostate	Tumor	1	937	Metastasis	Male	Matched	2.59409	10	NA	NA	NA	NA	NA	NA	NA	NA	NA	NA	NA	NA	NA	NA	NA	NA	NA	NA	NA	NA	NA	NA	NA
prad_cdk12_mskcc_2020	P-0016911	P-0016911-T01-IM6	prad_cdk12_mskcc_2020:P-0016911-T01-IM6	prad_cdk12_mskcc_2020:P-0016911	0	NO	Prostate Cancer	Prostate Adenocarcinoma	0.0869	IMPACT468	MSKCC	Lymph Node	NA	0.65	Do not report	1	PRAD	Prostate	Tumor	1	949	Metastasis	Male	Matched	0.864698	60	NA	NA	NA	NA	NA	NA	NA	NA	NA	NA	NA	NA	NA	NA	NA	NA	NA	NA	NA	NA	NA	NA	NA
prad_cdk12_mskcc_2020	P-0016921	P-0016921-T01-IM6	prad_cdk12_mskcc_2020:P-0016921-T01-IM6	prad_cdk12_mskcc_2020:P-0016921	0	NO	Prostate Cancer	Prostate Adenocarcinoma	0.3736	IMPACT468	MSKCC	Lymph Node	NA	1.11	Do not report	4	PRAD	Prostate	Tumor	1	1061	Metastasis	Male	Matched	3.45879	60	NA	NA	NA	NA	NA	NA	NA	NA	NA	NA	NA	NA	NA	NA	NA	NA	NA	NA	NA	NA	NA	NA	NA
prad_cdk12_mskcc_2020	P-0016983	P-0016983-T02-IM6	prad_cdk12_mskcc_2020:P-0016983-T02-IM6	prad_cdk12_mskcc_2020:P-0016983	0	NO	Prostate Cancer	Prostate Adenocarcinoma	0.5899	IMPACT468	MSKCC	Bladder	MICROSATELLITE STABLE (MSS). This result is for investigational use only. See MSI note below.	1.2	Stable	6	PRAD	Prostate	Tumor	1	738	Metastasis	Male	Matched	5.18819	60	NA	NA	NA	NA	NA	NA	NA	NA	NA	NA	NA	NA	NA	NA	NA	NA	NA	NA	NA	NA	NA	NA	NA
prad_cdk12_mskcc_2020	P-0017169	P-0017169-T01-IM6	prad_cdk12_mskcc_2020:P-0017169-T01-IM6	prad_cdk12_mskcc_2020:P-0017169	0	NO	Prostate Cancer	Prostate Adenocarcinoma	0.3661	IMPACT468	MSKCC	Lymph Node	NA	0.28	Do not report	6	PRAD	Prostate	Tumor	1	1047	Metastasis	Male	Matched	5.18819	50	NA	NA	NA	NA	NA	NA	NA	NA	NA	NA	NA	NA	NA	NA	NA	NA	NA	NA	NA	NA	NA	NA	NA
prad_cdk12_mskcc_2020	P-0017232	P-0017232-T01-IM6	prad_cdk12_mskcc_2020:P-0017232-T01-IM6	prad_cdk12_mskcc_2020:P-0017232	0	NO	Prostate Cancer	Prostate Adenocarcinoma	0.5993	IMPACT468	MSKCC	Liver	NA	2.3	Do not report	1	PRAD	Prostate	Tumor	1	894	Metastasis	Male	Matched	0.864698	60	NA	NA	NA	NA	NA	NA	NA	NA	NA	NA	NA	NA	NA	NA	NA	NA	NA	NA	NA	NA	NA	NA	NA
prad_cdk12_mskcc_2020	P-0017235	P-0017235-T01-IM6	prad_cdk12_mskcc_2020:P-0017235-T01-IM6	prad_cdk12_mskcc_2020:P-0017235	0	NO	Prostate Cancer	Prostate Adenocarcinoma	0.0103	IMPACT468	MSKCC	Liver	NA	0.07	Do not report	2	PRAD	Prostate	Tumor	1	765	Metastasis	Male	Matched	1.7294	10	NA	NA	NA	NA	NA	NA	NA	NA	NA	NA	NA	NA	NA	NA	NA	NA	NA	NA	NA	NA	NA	NA	NA
prad_cdk12_mskcc_2020	P-0017271	P-0017271-T01-IM6	prad_cdk12_mskcc_2020:P-0017271-T01-IM6	prad_cdk12_mskcc_2020:P-0017271	0	NO	Prostate Cancer	Prostate Adenocarcinoma	0.2807	IMPACT468	MSKCC	Lymph Node	NA	1.6	Do not report	3	PRAD	Prostate	Tumor	1	911	Metastasis	Male	Matched	2.59409	50	NA	NA	NA	NA	NA	NA	NA	NA	NA	NA	NA	NA	NA	NA	NA	NA	NA	NA	NA	NA	NA	NA	NA
prad_cdk12_mskcc_2020	P-0017376	P-0017376-T01-IM6	prad_cdk12_mskcc_2020:P-0017376-T01-IM6	prad_cdk12_mskcc_2020:P-0017376	0	NO	Prostate Cancer	Prostate Adenocarcinoma	0.2371	IMPACT468	MSKCC	Lymph Node	NA	0.5	Do not report	6	PRAD	Prostate	Tumor	1	886	Metastasis	Male	Matched	5.18819	30	NA	NA	NA	NA	NA	NA	NA	NA	NA	NA	NA	NA	NA	NA	NA	NA	NA	NA	NA	NA	NA	NA	NA
prad_cdk12_mskcc_2020	P-0017524	P-0017524-T01-IM6	prad_cdk12_mskcc_2020:P-0017524-T01-IM6	prad_cdk12_mskcc_2020:P-0017524	0	NO	Prostate Cancer	Prostate Adenocarcinoma	0.2022	IMPACT468	MSKCC	Retroperitoneum	NA	0.27	Do not report	5	PRAD	Prostate	Tumor	1	940	Metastasis	Male	Matched	4.32349	50	NA	NA	NA	NA	NA	NA	NA	NA	NA	NA	NA	NA	NA	NA	NA	NA	NA	NA	NA	NA	NA	NA	NA
prad_cdk12_mskcc_2020	P-0017548	P-0017548-T01-IM5	prad_cdk12_mskcc_2020:P-0017548-T01-IM5	prad_cdk12_mskcc_2020:P-0017548	0	NO	Prostate Cancer	Prostate Adenocarcinoma	0.3193	IMPACT410	MSKCC	Liver	NA	0	Do not report	5	PRAD	Prostate	Tumor	1	482	Metastasis	Male	Matched	4.8936	30	NA	NA	NA	NA	NA	NA	NA	NA	NA	NA	NA	NA	NA	NA	NA	NA	NA	NA	NA	NA	NA	NA	NA
prad_cdk12_mskcc_2020	P-0017615	P-0017615-T01-IM5	prad_cdk12_mskcc_2020:P-0017615-T01-IM5	prad_cdk12_mskcc_2020:P-0017615	0	NO	Prostate Cancer	Prostate Adenocarcinoma	0.1806	IMPACT410	MSKCC	Lymph Node	NA	0.58	Do not report	2	PRAD	Prostate	Tumor	1	1189	Metastasis	Male	Matched	1.95744	60	NA	NA	NA	NA	NA	NA	NA	NA	NA	NA	NA	NA	NA	NA	NA	NA	NA	NA	NA	NA	NA	NA	NA
prad_cdk12_mskcc_2020	P-0017708	P-0017708-T01-IM6	prad_cdk12_mskcc_2020:P-0017708-T01-IM6	prad_cdk12_mskcc_2020:P-0017708	0	NO	Prostate Cancer	Prostate Adenocarcinoma	0.1702	IMPACT468	MSKCC	Lymph Node	NA	0.47	Do not report	6	PRAD	Prostate	Tumor	1	453	Metastasis	Male	Matched	5.18819	30	NA	NA	NA	NA	NA	NA	NA	NA	NA	NA	NA	NA	NA	NA	NA	NA	NA	NA	NA	NA	NA	NA	NA
prad_cdk12_mskcc_2020	P-0017754	P-0017754-T02-IM6	prad_cdk12_mskcc_2020:P-0017754-T02-IM6	prad_cdk12_mskcc_2020:P-0017754	0	NO	Prostate Cancer	Prostate Adenocarcinoma	0.2976	IMPACT468	MSKCC	Bone	MICROSATELLITE STABLE (MSS). See MSI note below.	0	Stable	3	PRAD	Prostate	Tumor	1	447	Metastasis	Male	Matched	2.59409	50	NA	NA	NA	NA	NA	NA	NA	NA	NA	NA	NA	NA	NA	NA	NA	NA	NA	NA	NA	NA	NA	NA	NA
prad_cdk12_mskcc_2020	P-0017882	P-0017882-T01-IM6	prad_cdk12_mskcc_2020:P-0017882-T01-IM6	prad_cdk12_mskcc_2020:P-0017882	0	NO	Prostate Cancer	Prostate Adenocarcinoma	0.5168	IMPACT468	MSKCC	Adrenal	NA	1.1	Do not report	3	PRAD	Prostate	Tumor	1	779	Metastasis	Male	Matched	2.59409	60	NA	NA	NA	NA	NA	NA	NA	NA	NA	NA	NA	NA	NA	NA	NA	NA	NA	NA	NA	NA	NA	NA	NA
prad_cdk12_mskcc_2020	P-0017886	P-0017886-T01-IM6	prad_cdk12_mskcc_2020:P-0017886-T01-IM6	prad_cdk12_mskcc_2020:P-0017886	0	NO	Prostate Cancer	Prostate Adenocarcinoma	0.1652	IMPACT468	MSKCC	Lymph node	NA	0.17	Do not report	6	PRAD	Prostate	Tumor	1	870	Metastasis	Male	Matched	5.18819	70	NA	NA	NA	NA	NA	NA	NA	NA	NA	NA	NA	NA	NA	NA	NA	NA	NA	NA	NA	NA	NA	NA	NA
prad_cdk12_mskcc_2020	P-0017944	P-0017944-T01-IM6	prad_cdk12_mskcc_2020:P-0017944-T01-IM6	prad_cdk12_mskcc_2020:P-0017944	0	NO	Prostate Cancer	Prostate Adenocarcinoma	0.0618	IMPACT468	MSKCC	Vertebrate	NA	0.19	Do not report	3	PRAD	Prostate	Tumor	1	1044	Metastasis	Male	Matched	2.59409	20	NA	NA	NA	NA	NA	NA	NA	NA	NA	NA	NA	NA	NA	NA	NA	NA	NA	NA	NA	NA	NA	NA	NA
prad_cdk12_mskcc_2020	P-0018086	P-0018086-T01-IM6	prad_cdk12_mskcc_2020:P-0018086-T01-IM6	prad_cdk12_mskcc_2020:P-0018086	0	NO	Prostate Cancer	Prostate Adenocarcinoma	0.21	IMPACT468	MSKCC	Lung	NA	0	Do not report	7	PRAD	Prostate	Tumor	1	987	Metastasis	Male	Matched	6.05289	50	NA	NA	NA	NA	NA	NA	NA	NA	NA	NA	NA	NA	NA	NA	NA	NA	NA	NA	NA	NA	NA	NA	NA
prad_cdk12_mskcc_2020	P-0018090	P-0018090-T01-IM6	prad_cdk12_mskcc_2020:P-0018090-T01-IM6	prad_cdk12_mskcc_2020:P-0018090	0	NO	Prostate Cancer	Prostate Adenocarcinoma	0.1043	IMPACT468	MSKCC	Lymph Node	NA	0.4	Do not report	1	PRAD	Prostate	Tumor	1	642	Metastasis	Male	Matched	0.864698	10	NA	NA	NA	NA	NA	NA	NA	NA	NA	NA	NA	NA	NA	NA	NA	NA	NA	NA	NA	NA	NA	NA	NA
prad_cdk12_mskcc_2020	P-0018117	P-0018117-T01-IM6	prad_cdk12_mskcc_2020:P-0018117-T01-IM6	prad_cdk12_mskcc_2020:P-0018117	0	NO	Prostate Cancer	Prostate Adenocarcinoma	0.3563	IMPACT468	MSKCC	Lymph Node	NA	0.92	Do not report	12	PRAD	Prostate	Tumor	1	807	Metastasis	Male	Matched	10.3764	30	NA	NA	NA	NA	NA	NA	NA	NA	NA	NA	NA	NA	NA	NA	NA	NA	NA	NA	NA	NA	NA	NA	NA
prad_cdk12_mskcc_2020	P-0018178	P-0018178-T03-IM6	prad_cdk12_mskcc_2020:P-0018178-T03-IM6	prad_cdk12_mskcc_2020:P-0018178	0	NO	Prostate Cancer	Prostate Adenocarcinoma	0.111	IMPACT468	MSKCC	Bone	MICROSATELLITE STABLE (MSS). See MSI note below.	0	Stable	2	PRAD	Prostate	Tumor	1	525	Metastasis	Male	Matched	1.7294	20	NA	NA	NA	NA	NA	NA	NA	NA	NA	NA	NA	NA	NA	NA	NA	NA	NA	NA	NA	NA	NA	NA	NA
prad_cdk12_mskcc_2020	P-0018221	P-0018221-T01-IM6	prad_cdk12_mskcc_2020:P-0018221-T01-IM6	prad_cdk12_mskcc_2020:P-0018221	0	NO	Prostate Cancer	Prostate Adenocarcinoma	0.0177	IMPACT468	MSKCC	Lymph Node	NA	0.19	Do not report	2	PRAD	Prostate	Tumor	1	686	Metastasis	Male	Matched	1.7294	50	NA	NA	NA	NA	NA	NA	NA	NA	NA	NA	NA	NA	NA	NA	NA	NA	NA	NA	NA	NA	NA	NA	NA
prad_cdk12_mskcc_2020	P-0018315	P-0018315-T01-IM6	prad_cdk12_mskcc_2020:P-0018315-T01-IM6	prad_cdk12_mskcc_2020:P-0018315	0	NO	Prostate Cancer	Prostate Adenocarcinoma	0.218	IMPACT468	MSKCC	Liver	NA	0.54	Do not report	4	PRAD	Prostate	Tumor	1	609	Metastasis	Male	Matched	3.45879	50	NA	NA	NA	NA	NA	NA	NA	NA	NA	NA	NA	NA	NA	NA	NA	NA	NA	NA	NA	NA	NA	NA	NA
prad_cdk12_mskcc_2020	P-0018384	P-0018384-T01-IM6	prad_cdk12_mskcc_2020:P-0018384-T01-IM6	prad_cdk12_mskcc_2020:P-0018384	0	YES	Prostate Cancer	Prostate Adenocarcinoma	0	IMPACT468	MSKCC	Lung	NA	0	Do not report	1	PRAD	Prostate	Tumor	1	618	Metastasis	Male	Matched	0.864698	10	NA	NA	NA	NA	NA	NA	NA	NA	NA	NA	NA	NA	NA	NA	NA	NA	NA	NA	NA	NA	NA	NA	NA
prad_cdk12_mskcc_2020	P-0018489	P-0018489-T01-IM6	prad_cdk12_mskcc_2020:P-0018489-T01-IM6	prad_cdk12_mskcc_2020:P-0018489	0	NO	Prostate Cancer	Prostate Adenocarcinoma	0.0506	IMPACT468	MSKCC	Liver	NA	0	Do not report	7	PRAD	Prostate	Tumor	1	689	Metastasis	Male	Matched	6.05289	20	NA	NA	NA	NA	NA	NA	NA	NA	NA	NA	NA	NA	NA	NA	NA	NA	NA	NA	NA	NA	NA	NA	NA
prad_cdk12_mskcc_2020	P-0018556	P-0018556-T01-IM6	prad_cdk12_mskcc_2020:P-0018556-T01-IM6	prad_cdk12_mskcc_2020:P-0018556	0	NO	Prostate Cancer	Prostate Adenocarcinoma	0.0918	IMPACT468	MSKCC	Liver	NA	0.14	Do not report	4	PRAD	Prostate	Tumor	1	916	Metastasis	Male	Matched	3.45879	30	NA	NA	NA	NA	NA	NA	NA	NA	NA	NA	NA	NA	NA	NA	NA	NA	NA	NA	NA	NA	NA	NA	NA
prad_cdk12_mskcc_2020	P-0018581	P-0018581-T01-IM6	prad_cdk12_mskcc_2020:P-0018581-T01-IM6	prad_cdk12_mskcc_2020:P-0018581	0	NO	Prostate Cancer	Prostate Adenocarcinoma	0.2162	IMPACT468	MSKCC	Lymph Node	NA	0.52	Do not report	3	PRAD	Prostate	Tumor	1	722	Metastasis	Male	Matched	2.59409	60	NA	NA	NA	NA	NA	NA	NA	NA	NA	NA	NA	NA	NA	NA	NA	NA	NA	NA	NA	NA	NA	NA	NA
prad_cdk12_mskcc_2020	P-0018588	P-0018588-T02-IM6	prad_cdk12_mskcc_2020:P-0018588-T02-IM6	prad_cdk12_mskcc_2020:P-0018588	0	NO	Prostate Cancer	Prostate Adenocarcinoma	0.2468	IMPACT468	MSKCC	Retroperitoneum	MICROSATELLITE STABLE (MSS). See MSI note below.	0.41	Stable	3	PRAD	Prostate	Tumor	1	690	Metastasis	Male	Matched	2.59409	30	NA	NA	NA	NA	NA	NA	NA	NA	NA	NA	NA	NA	NA	NA	NA	NA	NA	NA	NA	NA	NA	NA	NA
prad_cdk12_mskcc_2020	P-0018605	P-0018605-T01-IM6	prad_cdk12_mskcc_2020:P-0018605-T01-IM6	prad_cdk12_mskcc_2020:P-0018605	0	NO	Prostate Cancer	Prostate Adenocarcinoma	0.359	IMPACT468	MSKCC	Liver	NA	2.28	Do not report	3	PRAD	Prostate	Tumor	1	1028	Metastasis	Male	Matched	2.59409	60	NA	NA	NA	NA	NA	NA	NA	NA	NA	NA	NA	NA	NA	NA	NA	NA	NA	NA	NA	NA	NA	NA	NA
prad_cdk12_mskcc_2020	P-0018607	P-0018607-T03-IM6	prad_cdk12_mskcc_2020:P-0018607-T03-IM6	prad_cdk12_mskcc_2020:P-0018607	0	NO	Prostate Cancer	Prostate Adenocarcinoma	0.2255	IMPACT468	MSKCC	Bone	MICROSATELLITE STABLE (MSS). See MSI note below.	0.06	Stable	7	PRAD	Prostate	Tumor	1	536	Metastasis	Male	Matched	6.05289	10	NA	NA	NA	NA	NA	NA	NA	NA	NA	NA	NA	NA	NA	NA	NA	NA	NA	NA	NA	NA	NA	NA	NA
prad_cdk12_mskcc_2020	P-0018627	P-0018627-T01-IM6	prad_cdk12_mskcc_2020:P-0018627-T01-IM6	prad_cdk12_mskcc_2020:P-0018627	0	NO	Prostate Cancer	Prostate Adenocarcinoma	0.5036	IMPACT468	MSKCC	Liver	MICROSATELLITE STABLE (MSS). This result is for investigational use only. See MSI note below.	0.89	Stable	6	PRAD	Prostate	Tumor	1	388	Metastasis	Male	Matched	5.18819	20	NA	NA	NA	NA	NA	NA	NA	NA	NA	NA	NA	NA	NA	NA	NA	NA	NA	NA	NA	NA	NA	NA	NA
prad_cdk12_mskcc_2020	P-0018649	P-0018649-T01-IM6	prad_cdk12_mskcc_2020:P-0018649-T01-IM6	prad_cdk12_mskcc_2020:P-0018649	0	NO	Prostate Cancer	Prostate Adenocarcinoma	0.3344	IMPACT468	MSKCC	Lymph Node	NA	0.12	Do not report	1	PRAD	Prostate	Tumor	1	1118	Metastasis	Male	Matched	0.864698	30	NA	NA	NA	NA	NA	NA	NA	NA	NA	NA	NA	NA	NA	NA	NA	NA	NA	NA	NA	NA	NA	NA	NA
prad_cdk12_mskcc_2020	P-0018659	P-0018659-T02-IM6	prad_cdk12_mskcc_2020:P-0018659-T02-IM6	prad_cdk12_mskcc_2020:P-0018659	0	NO	Prostate Cancer	Prostate Adenocarcinoma	0.2387	IMPACT468	MSKCC	Lymph Node	MICROSATELLITE STABLE (MSS). This result is for investigational use only. See MSI note below.	0.5	Stable	6	PRAD	Prostate	Tumor	1	657	Metastasis	Male	Matched	5.18819	60	NA	NA	NA	NA	NA	NA	NA	NA	NA	NA	NA	NA	NA	NA	NA	NA	NA	NA	NA	NA	NA	NA	NA
prad_cdk12_mskcc_2020	P-0018791	P-0018791-T01-IM6	prad_cdk12_mskcc_2020:P-0018791-T01-IM6	prad_cdk12_mskcc_2020:P-0018791	0	NO	Prostate Cancer	Prostate Adenocarcinoma	0.7526	IMPACT468	MSKCC	Lymph Node	MICROSATELLITE STABLE (MSS). This result is for investigational use only. See MSI note below.	1.73	Stable	5	PRAD	Prostate	Tumor	1	726	Metastasis	Male	Matched	4.32349	40	NA	NA	NA	NA	NA	NA	NA	NA	NA	NA	NA	NA	NA	NA	NA	NA	NA	NA	NA	NA	NA	NA	NA
prad_cdk12_mskcc_2020	P-0018812	P-0018812-T01-IM6	prad_cdk12_mskcc_2020:P-0018812-T01-IM6	prad_cdk12_mskcc_2020:P-0018812	0	YES	Prostate Cancer	Prostate Adenocarcinoma	0.4645	IMPACT468	MSKCC	Lymph Node	NA	1.14	Do not report	4	PRAD	Prostate	Tumor	1	570	Metastasis	Male	Matched	3.45879	50	NA	NA	NA	NA	NA	NA	NA	NA	NA	NA	NA	NA	NA	NA	NA	NA	NA	NA	NA	NA	NA	NA	NA
prad_cdk12_mskcc_2020	P-0018870	P-0018870-T01-IM6	prad_cdk12_mskcc_2020:P-0018870-T01-IM6	prad_cdk12_mskcc_2020:P-0018870	0	NO	Prostate Cancer	Prostate Adenocarcinoma	0.6327	IMPACT468	MSKCC	Bone	MICROSATELLITE STABLE (MSS). This result is for investigational use only. See MSI note below.	0.9	Stable	2	PRAD	Prostate	Tumor	1	793	Metastasis	Male	Matched	1.7294	40	NA	NA	NA	NA	NA	NA	NA	NA	NA	NA	NA	NA	NA	NA	NA	NA	NA	NA	NA	NA	NA	NA	NA
prad_cdk12_mskcc_2020	P-0018956	P-0018956-T01-IM6	prad_cdk12_mskcc_2020:P-0018956-T01-IM6	prad_cdk12_mskcc_2020:P-0018956	0	NO	Prostate Cancer	Prostate Adenocarcinoma	0.2648	IMPACT468	MSKCC	Bone	MICROSATELLITE STABLE (MSS). This result is for investigational use only. See MSI note below.	0	Stable	6	PRAD	Prostate	Tumor	1	732	Metastasis	Male	Matched	5.18819	10	NA	NA	NA	NA	NA	NA	NA	NA	NA	NA	NA	NA	NA	NA	NA	NA	NA	NA	NA	NA	NA	NA	NA
prad_cdk12_mskcc_2020	P-0019114	P-0019114-T01-IM6	prad_cdk12_mskcc_2020:P-0019114-T01-IM6	prad_cdk12_mskcc_2020:P-0019114	0	NO	Prostate Cancer	Prostate Adenocarcinoma	0.6719	IMPACT468	MSKCC	Sacral Mass	MICROSATELLITE STABLE (MSS). This result is for investigational use only. See MSI note below.	1.34	Stable	5	PRAD	Prostate	Tumor	1	702	Metastasis	Male	Matched	4.32349	60	NA	NA	NA	NA	NA	NA	NA	NA	NA	NA	NA	NA	NA	NA	NA	NA	NA	NA	NA	NA	NA	NA	NA
prad_cdk12_mskcc_2020	P-0019212	P-0019212-T03-IM6	prad_cdk12_mskcc_2020:P-0019212-T03-IM6	prad_cdk12_mskcc_2020:P-0019212	0	NO	Prostate Cancer	Prostate Adenocarcinoma	0.1169	IMPACT468	MSKCC	Lymph Node	MICROSATELLITE STABLE (MSS). This result is for investigational use only. See MSI note below.	0	Stable	8	PRAD	Prostate	Tumor	1	536	Metastasis	Male	Matched	6.91758	60	NA	NA	NA	NA	NA	NA	NA	NA	NA	NA	NA	NA	NA	NA	NA	NA	NA	NA	NA	NA	NA	NA	NA
prad_cdk12_mskcc_2020	P-0019332	P-0019332-T01-IM6	prad_cdk12_mskcc_2020:P-0019332-T01-IM6	prad_cdk12_mskcc_2020:P-0019332	0	NO	Prostate Cancer	Prostate Adenocarcinoma	0.2348	IMPACT468	MSKCC	Adrenal Gland	MICROSATELLITE STABLE (MSS). This result is for investigational use only. See MSI note below.	0.43	Stable	1	PRAD	Prostate	Tumor	1	606	Metastasis	Male	Matched	0.864698	60	NA	NA	NA	NA	NA	NA	NA	NA	NA	NA	NA	NA	NA	NA	NA	NA	NA	NA	NA	NA	NA	NA	NA
prad_cdk12_mskcc_2020	P-0019420	P-0019420-T01-IM6	prad_cdk12_mskcc_2020:P-0019420-T01-IM6	prad_cdk12_mskcc_2020:P-0019420	0	NO	Prostate Cancer	Prostate Adenocarcinoma	0.2136	IMPACT468	MSKCC	Lymph Node	MICROSATELLITE STABLE (MSS). This result is for investigational use only. See MSI note below.	1	Stable	2	PRAD	Prostate	Tumor	1	885	Metastasis	Male	Matched	1.7294	70	NA	NA	NA	NA	NA	NA	NA	NA	NA	NA	NA	NA	NA	NA	NA	NA	NA	NA	NA	NA	NA	NA	NA
prad_cdk12_mskcc_2020	P-0019462	P-0019462-T01-IM6	prad_cdk12_mskcc_2020:P-0019462-T01-IM6	prad_cdk12_mskcc_2020:P-0019462	0	NO	Prostate Cancer	Prostate Adenocarcinoma	0.1986	IMPACT468	MSKCC	Epidural	MICROSATELLITE STABLE (MSS). This result is for investigational use only. See MSI note below.	0.06	Stable	6	PRAD	Prostate	Tumor	1	640	Metastasis	Male	Matched	5.18819	30	NA	NA	NA	NA	NA	NA	NA	NA	NA	NA	NA	NA	NA	NA	NA	NA	NA	NA	NA	NA	NA	NA	NA
prad_cdk12_mskcc_2020	P-0019582	P-0019582-T01-IM6	prad_cdk12_mskcc_2020:P-0019582-T01-IM6	prad_cdk12_mskcc_2020:P-0019582	0	NO	Prostate Cancer	Prostate Adenocarcinoma	0.3629	IMPACT468	MSKCC	Lymph Node	MICROSATELLITE STABLE (MSS). This result is for investigational use only. See MSI note below.	0.46	Stable	13	PRAD	Prostate	Tumor	1	853	Metastasis	Male	Matched	11.2411	40	NA	NA	NA	NA	NA	NA	NA	NA	NA	NA	NA	NA	NA	NA	NA	NA	NA	NA	NA	NA	NA	NA	NA
prad_cdk12_mskcc_2020	P-0019623	P-0019623-T02-IM6	prad_cdk12_mskcc_2020:P-0019623-T02-IM6	prad_cdk12_mskcc_2020:P-0019623	0	NO	Prostate Cancer	Prostate Adenocarcinoma	0.1696	IMPACT468	MSKCC	Adrenal Gland	MICROSATELLITE STABLE (MSS). See MSI note below.	0	Stable	4	PRAD	Prostate	Tumor	1	629	Metastasis	Male	Matched	3.45879	20	NA	NA	NA	NA	NA	NA	NA	NA	NA	NA	NA	NA	NA	NA	NA	NA	NA	NA	NA	NA	NA	NA	NA
prad_cdk12_mskcc_2020	P-0019624	P-0019624-T01-IM6	prad_cdk12_mskcc_2020:P-0019624-T01-IM6	prad_cdk12_mskcc_2020:P-0019624	0	NO	Prostate Cancer	Prostate Adenocarcinoma	0.4434	IMPACT468	MSKCC	Bone	MICROSATELLITE STABLE (MSS). This result is for investigational use only. See MSI note below.	1.45	Stable	4	PRAD	Prostate	Tumor	1	705	Metastasis	Male	Matched	3.45879	50	NA	NA	NA	NA	NA	NA	NA	NA	NA	NA	NA	NA	NA	NA	NA	NA	NA	NA	NA	NA	NA	NA	NA
prad_cdk12_mskcc_2020	P-0019819	P-0019819-T02-IM6	prad_cdk12_mskcc_2020:P-0019819-T02-IM6	prad_cdk12_mskcc_2020:P-0019819	0	NO	Prostate Cancer	Prostate Adenocarcinoma	0.0819	IMPACT468	MSKCC	Lymph Node	MICROSATELLITE STABLE (MSS). See MSI note below.	0	Stable	4	PRAD	Prostate	Tumor	1	726	Metastasis	Male	Matched	3.45879	30	NA	NA	NA	NA	NA	NA	NA	NA	NA	NA	NA	NA	NA	NA	NA	NA	NA	NA	NA	NA	NA	NA	NA
prad_cdk12_mskcc_2020	P-0019830	P-0019830-T01-IM6	prad_cdk12_mskcc_2020:P-0019830-T01-IM6	prad_cdk12_mskcc_2020:P-0019830	0	NO	Prostate Cancer	Prostate Adenocarcinoma	0.1583	IMPACT468	MSKCC	Lymph Node	MICROSATELLITE STABLE (MSS). This result is for investigational use only. See MSI note below.	0.81	Stable	2	PRAD	Prostate	Tumor	1	454	Metastasis	Male	Matched	1.7294	40	NA	NA	NA	NA	NA	NA	NA	NA	NA	NA	NA	NA	NA	NA	NA	NA	NA	NA	NA	NA	NA	NA	NA
prad_cdk12_mskcc_2020	P-0019840	P-0019840-T01-IM6	prad_cdk12_mskcc_2020:P-0019840-T01-IM6	prad_cdk12_mskcc_2020:P-0019840	0	YES	Prostate Cancer	Prostate Adenocarcinoma	0.235	IMPACT468	MSKCC	Retroperitoneum	MICROSATELLITE STABLE (MSS). This result is for investigational use only. See MSI note below.	0.59	Stable	7	PRAD	Prostate	Tumor	1	913	Metastasis	Male	Matched	6.05289	30	NA	NA	NA	NA	NA	NA	NA	NA	NA	NA	NA	NA	NA	NA	NA	NA	NA	NA	NA	NA	NA	NA	NA
prad_cdk12_mskcc_2020	P-0019863	P-0019863-T01-IM6	prad_cdk12_mskcc_2020:P-0019863-T01-IM6	prad_cdk12_mskcc_2020:P-0019863	0	NO	Prostate Cancer	Prostate Adenocarcinoma	0.3856	IMPACT468	MSKCC	Lymph Node	MICROSATELLITE STABLE (MSS). This result is for investigational use only. See MSI note below.	1.25	Stable	2	PRAD	Prostate	Tumor	1	867	Metastasis	Male	Matched	1.7294	30	NA	NA	NA	NA	NA	NA	NA	NA	NA	NA	NA	NA	NA	NA	NA	NA	NA	NA	NA	NA	NA	NA	NA
prad_cdk12_mskcc_2020	P-0019918	P-0019918-T01-IM6	prad_cdk12_mskcc_2020:P-0019918-T01-IM6	prad_cdk12_mskcc_2020:P-0019918	0	NO	Prostate Cancer	Prostate Adenocarcinoma	0.0831	IMPACT468	MSKCC	Lung	MICROSATELLITE STABLE (MSS). This result is for investigational use only. See MSI note below.	0.71	Stable	4	PRAD	Prostate	Tumor	1	217	Metastasis	Male	Matched	3.45879	30	NA	NA	NA	NA	NA	NA	NA	NA	NA	NA	NA	NA	NA	NA	NA	NA	NA	NA	NA	NA	NA	NA	NA
prad_cdk12_mskcc_2020	P-0019927	P-0019927-T01-IM6	prad_cdk12_mskcc_2020:P-0019927-T01-IM6	prad_cdk12_mskcc_2020:P-0019927	0	NO	Prostate Cancer	Prostate Adenocarcinoma	0.4698	IMPACT468	MSKCC	Retroperitoneum	MICROSATELLITE STABLE (MSS). This result is for investigational use only. See MSI note below.	1.11	Stable	5	PRAD	Prostate	Tumor	1	918	Metastasis	Male	Matched	4.32349	50	NA	NA	NA	NA	NA	NA	NA	NA	NA	NA	NA	NA	NA	NA	NA	NA	NA	NA	NA	NA	NA	NA	NA
prad_cdk12_mskcc_2020	P-0019930	P-0019930-T01-IM6	prad_cdk12_mskcc_2020:P-0019930-T01-IM6	prad_cdk12_mskcc_2020:P-0019930	0	NO	Prostate Cancer	Prostate Adenocarcinoma	0.2192	IMPACT468	MSKCC	Lymph Node	MICROSATELLITE STABLE (MSS). This result is for investigational use only. See MSI note below.	0.06	Stable	2	PRAD	Prostate	Tumor	1	924	Metastasis	Male	Matched	1.7294	60	NA	NA	NA	NA	NA	NA	NA	NA	NA	NA	NA	NA	NA	NA	NA	NA	NA	NA	NA	NA	NA	NA	NA
prad_cdk12_mskcc_2020	P-0019933	P-0019933-T01-IM6	prad_cdk12_mskcc_2020:P-0019933-T01-IM6	prad_cdk12_mskcc_2020:P-0019933	0	NO	Prostate Cancer	Prostate Adenocarcinoma	0.1988	IMPACT468	MSKCC	Pelvis	MICROSATELLITE STABLE (MSS). This result is for investigational use only. See MSI note below.	0.36	Stable	8	PRAD	Prostate	Tumor	1	930	Metastasis	Male	Matched	6.91758	30	NA	NA	NA	NA	NA	NA	NA	NA	NA	NA	NA	NA	NA	NA	NA	NA	NA	NA	NA	NA	NA	NA	NA
prad_cdk12_mskcc_2020	P-0020023	P-0020023-T01-IM6	prad_cdk12_mskcc_2020:P-0020023-T01-IM6	prad_cdk12_mskcc_2020:P-0020023	0	NO	Prostate Cancer	Prostate Adenocarcinoma	0.2949	IMPACT468	MSKCC	Lung	MICROSATELLITE STABLE (MSS). This result is for investigational use only. See MSI note below.	0	Stable	2	PRAD	Prostate	Tumor	1	514	Metastasis	Male	Matched	1.7294	60	NA	NA	NA	NA	NA	NA	NA	NA	NA	NA	NA	NA	NA	NA	NA	NA	NA	NA	NA	NA	NA	NA	NA
prad_cdk12_mskcc_2020	P-0020078	P-0020078-T01-IM6	prad_cdk12_mskcc_2020:P-0020078-T01-IM6	prad_cdk12_mskcc_2020:P-0020078	0	YES	Prostate Cancer	Prostate Adenocarcinoma	0.3816	IMPACT468	MSKCC	Lymph Node	MICROSATELLITE STABLE (MSS). This result is for investigational use only. See MSI note below.	0.13	Stable	5	PRAD	Prostate	Tumor	1	676	Metastasis	Male	Matched	4.32349	60	NA	NA	NA	NA	NA	NA	NA	NA	NA	NA	NA	NA	NA	NA	NA	NA	NA	NA	NA	NA	NA	NA	NA
prad_cdk12_mskcc_2020	P-0020150	P-0020150-T02-IM6	prad_cdk12_mskcc_2020:P-0020150-T02-IM6	prad_cdk12_mskcc_2020:P-0020150	0	NO	Prostate Cancer	Prostate Adenocarcinoma	0.1053	IMPACT468	MSKCC	Brain	MICROSATELLITE STABLE (MSS). See MSI note below.	0.57	Stable	3	PRAD	Prostate	Tumor	1	656	Metastasis	Male	Matched	2.59409	70	NA	NA	NA	NA	NA	NA	NA	NA	NA	NA	NA	NA	NA	NA	NA	NA	NA	NA	NA	NA	NA	NA	NA
prad_cdk12_mskcc_2020	P-0020237	P-0020237-T01-IM6	prad_cdk12_mskcc_2020:P-0020237-T01-IM6	prad_cdk12_mskcc_2020:P-0020237	0	NO	Prostate Cancer	Prostate Adenocarcinoma	0.0037	IMPACT468	MSKCC	Lymph Node	MICROSATELLITE STABLE (MSS). This result is for investigational use only. See MSI note below.	0.06	Stable	1	PRAD	Prostate	Tumor	1	716	Metastasis	Male	Matched	0.864698	40	NA	NA	NA	NA	NA	NA	NA	NA	NA	NA	NA	NA	NA	NA	NA	NA	NA	NA	NA	NA	NA	NA	NA
prad_cdk12_mskcc_2020	P-0020394	P-0020394-T01-IM6	prad_cdk12_mskcc_2020:P-0020394-T01-IM6	prad_cdk12_mskcc_2020:P-0020394	0	NO	Prostate Cancer	Prostate Adenocarcinoma	0.6363	IMPACT468	MSKCC	Bone	MICROSATELLITE STABLE (MSS). This result is for investigational use only. See MSI note below.	0.71	Stable	6	PRAD	Prostate	Tumor	1	1034	Metastasis	Male	Matched	4.32349	20	NA	NA	NA	NA	NA	NA	NA	NA	NA	NA	NA	NA	NA	NA	NA	NA	NA	NA	NA	NA	NA	NA	NA
prad_cdk12_mskcc_2020	P-0020482	P-0020482-T01-IM6	prad_cdk12_mskcc_2020:P-0020482-T01-IM6	prad_cdk12_mskcc_2020:P-0020482	0	NO	Prostate Cancer	Prostate Adenocarcinoma	0.1132	IMPACT468	MSKCC	Pelvis	MICROSATELLITE STABLE (MSS). This result is for investigational use only. See MSI note below.	0	Stable	4	PRAD	Prostate	Tumor	1	868	Metastasis	Male	Matched	3.45879	50	NA	NA	NA	NA	NA	NA	NA	NA	NA	NA	NA	NA	NA	NA	NA	NA	NA	NA	NA	NA	NA	NA	NA
prad_cdk12_mskcc_2020	P-0020512	P-0020512-T01-IM6	prad_cdk12_mskcc_2020:P-0020512-T01-IM6	prad_cdk12_mskcc_2020:P-0020512	0	NO	Prostate Cancer	Prostate Adenocarcinoma	0.0106	IMPACT468	MSKCC	Lymph Node	MICROSATELLITE STABLE (MSS). This result is for investigational use only. See MSI note below.	0.13	Stable	2	PRAD	Prostate	Tumor	1	831	Metastasis	Male	Matched	1.7294	50	NA	NA	NA	NA	NA	NA	NA	NA	NA	NA	NA	NA	NA	NA	NA	NA	NA	NA	NA	NA	NA	NA	NA
prad_cdk12_mskcc_2020	P-0020784	P-0020784-T01-IM6	prad_cdk12_mskcc_2020:P-0020784-T01-IM6	prad_cdk12_mskcc_2020:P-0020784	0	NO	Prostate Cancer	Prostate Adenocarcinoma	0.0413	IMPACT468	MSKCC	Bone	MICROSATELLITE STABLE (MSS). This result is for investigational use only. See MSI note below.	0.06	Stable	2	PRAD	Prostate	Tumor	1	799	Metastasis	Male	Matched	1.7294	20	NA	NA	NA	NA	NA	NA	NA	NA	NA	NA	NA	NA	NA	NA	NA	NA	NA	NA	NA	NA	NA	NA	NA
prad_cdk12_mskcc_2020	P-0020792	P-0020792-T01-IM6	prad_cdk12_mskcc_2020:P-0020792-T01-IM6	prad_cdk12_mskcc_2020:P-0020792	0	NO	Prostate Cancer	Prostate Adenocarcinoma	0.2393	IMPACT468	MSKCC	Retroperitoneum	MICROSATELLITE STABLE (MSS). This result is for investigational use only. See MSI note below.	0.85	Stable	4	PRAD	Prostate	Tumor	1	283	Metastasis	Male	Matched	3.45879	80	NA	NA	NA	NA	NA	NA	NA	NA	NA	NA	NA	NA	NA	NA	NA	NA	NA	NA	NA	NA	NA	NA	NA
prad_cdk12_mskcc_2020	P-0020812	P-0020812-T01-IM6	prad_cdk12_mskcc_2020:P-0020812-T01-IM6	prad_cdk12_mskcc_2020:P-0020812	0	NO	Prostate Cancer	Prostate Adenocarcinoma	0.2092	IMPACT468	MSKCC	Lymph Node	MICROSATELLITE STABLE (MSS). This result is for investigational use only. See MSI note below.	1.24	Stable	3	PRAD	Prostate	Tumor	1	1184	Metastasis	Male	Matched	2.59409	40	NA	NA	NA	NA	NA	NA	NA	NA	NA	NA	NA	NA	NA	NA	NA	NA	NA	NA	NA	NA	NA	NA	NA
prad_cdk12_mskcc_2020	P-0020833	P-0020833-T01-IM6	prad_cdk12_mskcc_2020:P-0020833-T01-IM6	prad_cdk12_mskcc_2020:P-0020833	0	NO	Prostate Cancer	Prostate Adenocarcinoma	0.0714	IMPACT468	MSKCC	Spine (Bone)	MICROSATELLITE STABLE (MSS). This result is for investigational use only. See MSI note below.	0.24	Stable	2	PRAD	Prostate	Tumor	1	1106	Metastasis	Male	Matched	1.7294	40	NA	NA	NA	NA	NA	NA	NA	NA	NA	NA	NA	NA	NA	NA	NA	NA	NA	NA	NA	NA	NA	NA	NA
prad_cdk12_mskcc_2020	P-0020882	P-0020882-T01-IM6	prad_cdk12_mskcc_2020:P-0020882-T01-IM6	prad_cdk12_mskcc_2020:P-0020882	0	NO	Prostate Cancer	Prostate Adenocarcinoma	0.5639	IMPACT468	MSKCC	Lymph Node	MICROSATELLITE STABLE (MSS). This result is for investigational use only. See MSI note below.	1.73	Stable	2	PRAD	Prostate	Tumor	1	1138	Metastasis	Male	Matched	1.7294	70	NA	NA	NA	NA	NA	NA	NA	NA	NA	NA	NA	NA	NA	NA	NA	NA	NA	NA	NA	NA	NA	NA	NA
prad_cdk12_mskcc_2020	P-0021023	P-0021023-T01-IM6	prad_cdk12_mskcc_2020:P-0021023-T01-IM6	prad_cdk12_mskcc_2020:P-0021023	0	NO	Prostate Cancer	Prostate Adenocarcinoma	0.3747	IMPACT468	MSKCC	Liver	MICROSATELLITE STABLE (MSS). This result is for investigational use only. See MSI note below.	1.41	Stable	2	PRAD	Prostate	Tumor	1	809	Metastasis	Male	Matched	1.7294	60	NA	NA	NA	NA	NA	NA	NA	NA	NA	NA	NA	NA	NA	NA	NA	NA	NA	NA	NA	NA	NA	NA	NA
prad_cdk12_mskcc_2020	P-0021083	P-0021083-T01-IM6	prad_cdk12_mskcc_2020:P-0021083-T01-IM6	prad_cdk12_mskcc_2020:P-0021083	0	NO	Prostate Cancer	Prostate Adenocarcinoma	0.0009	IMPACT468	MSKCC	Lymph Node	MICROSATELLITE STABLE (MSS). This result is for investigational use only. See MSI note below.	0	Stable	3	PRAD	Prostate	Tumor	1	731	Metastasis	Male	Matched	2.59409	10	NA	NA	NA	NA	NA	NA	NA	NA	NA	NA	NA	NA	NA	NA	NA	NA	NA	NA	NA	NA	NA	NA	NA
prad_cdk12_mskcc_2020	P-0021104	P-0021104-T01-IM6	prad_cdk12_mskcc_2020:P-0021104-T01-IM6	prad_cdk12_mskcc_2020:P-0021104	0	NO	Prostate Cancer	Prostate Adenocarcinoma	0.1408	IMPACT468	MSKCC	Lymph Node	MICROSATELLITE STABLE (MSS). This result is for investigational use only. See MSI note below.	0.26	Stable	2	PRAD	Prostate	Tumor	1	530	Metastasis	Male	Matched	1.7294	10	NA	NA	NA	NA	NA	NA	NA	NA	NA	NA	NA	NA	NA	NA	NA	NA	NA	NA	NA	NA	NA	NA	NA
prad_cdk12_mskcc_2020	P-0021122	P-0021122-T01-IM6	prad_cdk12_mskcc_2020:P-0021122-T01-IM6	prad_cdk12_mskcc_2020:P-0021122	0	NO	Prostate Cancer	Prostate Adenocarcinoma	0.009	IMPACT468	MSKCC	Bone	MICROSATELLITE STABLE (MSS). This result is for investigational use only. See MSI note below.	0	Stable	1	PRAD	Prostate	Tumor	1	478	Metastasis	Male	Matched	0.864698	10	NA	NA	NA	NA	NA	NA	NA	NA	NA	NA	NA	NA	NA	NA	NA	NA	NA	NA	NA	NA	NA	NA	NA
prad_cdk12_mskcc_2020	P-0021240	P-0021240-T01-IM6	prad_cdk12_mskcc_2020:P-0021240-T01-IM6	prad_cdk12_mskcc_2020:P-0021240	0	NO	Prostate Cancer	Prostate Adenocarcinoma	0.3858	IMPACT468	MSKCC	Lymph Node	MICROSATELLITE STABLE (MSS). This result is for investigational use only. See MSI note below.	1.51	Stable	4	PRAD	Prostate	Tumor	1	600	Metastasis	Male	Matched	3.45879	70	NA	NA	NA	NA	NA	NA	NA	NA	NA	NA	NA	NA	NA	NA	NA	NA	NA	NA	NA	NA	NA	NA	NA
prad_cdk12_mskcc_2020	P-0021271	P-0021271-T02-IM6	prad_cdk12_mskcc_2020:P-0021271-T02-IM6	prad_cdk12_mskcc_2020:P-0021271	0	NO	Prostate Cancer	Prostate Adenocarcinoma	0.1821	IMPACT468	MSKCC	Lymph Node	MICROSATELLITE STABLE (MSS). See MSI note below.	0	Stable	4	PRAD	Prostate	Tumor	1	560	Metastasis	Male	Matched	3.45879	30	NA	NA	NA	NA	NA	NA	NA	NA	NA	NA	NA	NA	NA	NA	NA	NA	NA	NA	NA	NA	NA	NA	NA
prad_cdk12_mskcc_2020	P-0021287	P-0021287-T01-IM6	prad_cdk12_mskcc_2020:P-0021287-T01-IM6	prad_cdk12_mskcc_2020:P-0021287	0	NO	Prostate Cancer	Prostate Adenocarcinoma	0.1387	IMPACT468	MSKCC	Bone	MICROSATELLITE STABLE (MSS). This result is for investigational use only. See MSI note below.	0.07	Stable	NA	PRAD	Prostate	Tumor	1	617	Metastasis	Male	Matched	0	10	NA	NA	NA	NA	NA	NA	NA	NA	NA	NA	NA	NA	NA	NA	NA	NA	NA	NA	NA	NA	NA	NA	NA
prad_cdk12_mskcc_2020	P-0021297	P-0021297-T01-IM6	prad_cdk12_mskcc_2020:P-0021297-T01-IM6	prad_cdk12_mskcc_2020:P-0021297	0	NO	Prostate Cancer	Prostate Adenocarcinoma	0.4683	IMPACT468	MSKCC	Bone	MICROSATELLITE STABLE (MSS). This result is for investigational use only. See MSI note below.	0.82	Stable	4	PRAD	Prostate	Tumor	1	402	Metastasis	Male	Matched	3.45879	30	NA	NA	NA	NA	NA	NA	NA	NA	NA	NA	NA	NA	NA	NA	NA	NA	NA	NA	NA	NA	NA	NA	NA
prad_cdk12_mskcc_2020	P-0021310	P-0021310-T01-IM6	prad_cdk12_mskcc_2020:P-0021310-T01-IM6	prad_cdk12_mskcc_2020:P-0021310	0	NO	Prostate Cancer	Prostate Adenocarcinoma	0.1083	IMPACT468	MSKCC	Lymph Node	MICROSATELLITE STABLE (MSS). This result is for investigational use only. See MSI note below.	0.74	Stable	6	PRAD	Prostate	Tumor	1	845	Metastasis	Male	Matched	5.18819	80	NA	NA	NA	NA	NA	NA	NA	NA	NA	NA	NA	NA	NA	NA	NA	NA	NA	NA	NA	NA	NA	NA	NA
prad_cdk12_mskcc_2020	P-0021342	P-0021342-T01-IM6	prad_cdk12_mskcc_2020:P-0021342-T01-IM6	prad_cdk12_mskcc_2020:P-0021342	0	NO	Prostate Cancer	Prostate Adenocarcinoma	0.0885	IMPACT468	MSKCC	Sternum	MICROSATELLITE STABLE (MSS). This result is for investigational use only. See MSI note below.	0.5	Stable	6	PRAD	Prostate	Tumor	1	900	Metastasis	Male	Matched	5.18819	60	NA	NA	NA	NA	NA	NA	NA	NA	NA	NA	NA	NA	NA	NA	NA	NA	NA	NA	NA	NA	NA	NA	NA
prad_cdk12_mskcc_2020	P-0021482	P-0021482-T01-IM6	prad_cdk12_mskcc_2020:P-0021482-T01-IM6	prad_cdk12_mskcc_2020:P-0021482	0	NO	Prostate Cancer	Prostate Adenocarcinoma	0.1334	IMPACT468	MSKCC	Lymph Node	MICROSATELLITE STABLE (MSS). This result is for investigational use only. See MSI note below.	0.18	Stable	2	PRAD	Prostate	Tumor	1	630	Metastasis	Male	Matched	1.7294	30	NA	NA	NA	NA	NA	NA	NA	NA	NA	NA	NA	NA	NA	NA	NA	NA	NA	NA	NA	NA	NA	NA	NA
prad_cdk12_mskcc_2020	P-0021486	P-0021486-T01-IM6	prad_cdk12_mskcc_2020:P-0021486-T01-IM6	prad_cdk12_mskcc_2020:P-0021486	0	NO	Prostate Cancer	Prostate Adenocarcinoma	0.1853	IMPACT468	MSKCC	Lung	MICROSATELLITE STABLE (MSS). This result is for investigational use only. See MSI note below.	0.13	Stable	4	PRAD	Prostate	Tumor	1	657	Metastasis	Male	Matched	3.45879	30	NA	NA	NA	NA	NA	NA	NA	NA	NA	NA	NA	NA	NA	NA	NA	NA	NA	NA	NA	NA	NA	NA	NA
prad_cdk12_mskcc_2020	P-0021525	P-0021525-T01-IM6	prad_cdk12_mskcc_2020:P-0021525-T01-IM6	prad_cdk12_mskcc_2020:P-0021525	0	NO	Prostate Cancer	Prostate Adenocarcinoma	0.0073	IMPACT468	MSKCC	Bone	MICROSATELLITE STABLE (MSS). This result is for investigational use only. See MSI note below.	0	Stable	6	PRAD	Prostate	Tumor	1	962	Metastasis	Male	Matched	5.18819	40	NA	NA	NA	NA	NA	NA	NA	NA	NA	NA	NA	NA	NA	NA	NA	NA	NA	NA	NA	NA	NA	NA	NA
prad_cdk12_mskcc_2020	P-0021561	P-0021561-T01-IM6	prad_cdk12_mskcc_2020:P-0021561-T01-IM6	prad_cdk12_mskcc_2020:P-0021561	0	NO	Prostate Cancer	Prostate Adenocarcinoma	0.2465	IMPACT468	MSKCC	Retroperitoneum	MICROSATELLITE STABLE (MSS). This result is for investigational use only. See MSI note below.	0.26	Stable	3	PRAD	Prostate	Tumor	1	816	Metastasis	Male	Matched	2.59409	60	NA	NA	NA	NA	NA	NA	NA	NA	NA	NA	NA	NA	NA	NA	NA	NA	NA	NA	NA	NA	NA	NA	NA
prad_cdk12_mskcc_2020	P-0021564	P-0021564-T01-IM6	prad_cdk12_mskcc_2020:P-0021564-T01-IM6	prad_cdk12_mskcc_2020:P-0021564	0	NO	Prostate Cancer	Prostate Adenocarcinoma	0.1367	IMPACT468	MSKCC	Lymph Node	MICROSATELLITE STABLE (MSS). This result is for investigational use only. See MSI note below.	0.85	Stable	2	PRAD	Prostate	Tumor	1	532	Metastasis	Male	Matched	1.7294	40	NA	NA	NA	NA	NA	NA	NA	NA	NA	NA	NA	NA	NA	NA	NA	NA	NA	NA	NA	NA	NA	NA	NA
prad_cdk12_mskcc_2020	P-0021596	P-0021596-T01-IM6	prad_cdk12_mskcc_2020:P-0021596-T01-IM6	prad_cdk12_mskcc_2020:P-0021596	0	NO	Prostate Cancer	Prostate Adenocarcinoma	0.4628	IMPACT468	MSKCC	Soft Tissue	MICROSATELLITE STABLE (MSS). This result is for investigational use only. See MSI note below.	1.71	Stable	3	PRAD	Prostate	Tumor	1	1019	Metastasis	Male	Matched	2.59409	40	NA	NA	NA	NA	NA	NA	NA	NA	NA	NA	NA	NA	NA	NA	NA	NA	NA	NA	NA	NA	NA	NA	NA
prad_cdk12_mskcc_2020	P-0021597	P-0021597-T02-IM6	prad_cdk12_mskcc_2020:P-0021597-T02-IM6	prad_cdk12_mskcc_2020:P-0021597	0	NO	Prostate Cancer	Prostate Adenocarcinoma	0.1283	IMPACT468	MSKCC	Lymph Node	MICROSATELLITE STABLE (MSS). See MSI note below.	0	Stable	1	PRAD	Prostate	Tumor	1	391	Metastasis	Male	Matched	0.864698	20	NA	NA	NA	NA	NA	NA	NA	NA	NA	NA	NA	NA	NA	NA	NA	NA	NA	NA	NA	NA	NA	NA	NA
prad_cdk12_mskcc_2020	P-0021603	P-0021603-T01-IM6	prad_cdk12_mskcc_2020:P-0021603-T01-IM6	prad_cdk12_mskcc_2020:P-0021603	0	NO	Prostate Cancer	Prostate Adenocarcinoma	0.2428	IMPACT468	MSKCC	Abdomen	MICROSATELLITE STABLE (MSS). This result is for investigational use only. See MSI note below.	0.58	Stable	5	PRAD	Prostate	Tumor	1	615	Metastasis	Male	Matched	4.32349	40	NA	NA	NA	NA	NA	NA	NA	NA	NA	NA	NA	NA	NA	NA	NA	NA	NA	NA	NA	NA	NA	NA	NA
prad_cdk12_mskcc_2020	P-0021698	P-0021698-T01-IM6	prad_cdk12_mskcc_2020:P-0021698-T01-IM6	prad_cdk12_mskcc_2020:P-0021698	0	NO	Prostate Cancer	Prostate Adenocarcinoma	0.3804	IMPACT468	MSKCC	Spine (Bone)	MICROSATELLITE STABLE (MSS). This result is for investigational use only. See MSI note below.	0.31	Stable	6	PRAD	Prostate	Tumor	1	632	Metastasis	Male	Matched	5.18819	30	NA	NA	NA	NA	NA	NA	NA	NA	NA	NA	NA	NA	NA	NA	NA	NA	NA	NA	NA	NA	NA	NA	NA
prad_cdk12_mskcc_2020	P-0021711	P-0021711-T01-IM6	prad_cdk12_mskcc_2020:P-0021711-T01-IM6	prad_cdk12_mskcc_2020:P-0021711	0	NO	Prostate Cancer	Prostate Adenocarcinoma	0.0043	IMPACT468	MSKCC	Soft Tissue	MICROSATELLITE STABLE (MSS). This result is for investigational use only. See MSI note below.	0	Stable	2	PRAD	Prostate	Tumor	1	522	Metastasis	Male	Matched	1.7294	10	NA	NA	NA	NA	NA	NA	NA	NA	NA	NA	NA	NA	NA	NA	NA	NA	NA	NA	NA	NA	NA	NA	NA
prad_cdk12_mskcc_2020	P-0021728	P-0021728-T01-IM6	prad_cdk12_mskcc_2020:P-0021728-T01-IM6	prad_cdk12_mskcc_2020:P-0021728	0	YES	Prostate Cancer	Prostate Adenocarcinoma	0.1256	IMPACT468	MSKCC	Bone	MICROSATELLITE STABLE (MSS). This result is for investigational use only. See MSI note below.	0.07	Stable	2	PRAD	Prostate	Tumor	1	735	Metastasis	Male	Matched	1.7294	20	NA	NA	NA	NA	NA	NA	NA	NA	NA	NA	NA	NA	NA	NA	NA	NA	NA	NA	NA	NA	NA	NA	NA
prad_cdk12_mskcc_2020	P-0021782	P-0021782-T01-IM6	prad_cdk12_mskcc_2020:P-0021782-T01-IM6	prad_cdk12_mskcc_2020:P-0021782	0	NO	Prostate Cancer	Prostate Adenocarcinoma	0.2784	IMPACT468	MSKCC	Bone	MICROSATELLITE STABLE (MSS). This result is for investigational use only. See MSI note below.	1.19	Stable	3	PRAD	Prostate	Tumor	1	968	Metastasis	Male	Matched	2.59409	30	NA	NA	NA	NA	NA	NA	NA	NA	NA	NA	NA	NA	NA	NA	NA	NA	NA	NA	NA	NA	NA	NA	NA
prad_cdk12_mskcc_2020	P-0021823	P-0021823-T01-IM6	prad_cdk12_mskcc_2020:P-0021823-T01-IM6	prad_cdk12_mskcc_2020:P-0021823	0	NO	Prostate Cancer	Prostate Adenocarcinoma	0.0248	IMPACT468	MSKCC	Lung	MICROSATELLITE STABLE (MSS). This result is for investigational use only. See MSI note below.	0	Stable	5	PRAD	Prostate	Tumor	1	800	Metastasis	Male	Matched	4.32349	10	NA	NA	NA	NA	NA	NA	NA	NA	NA	NA	NA	NA	NA	NA	NA	NA	NA	NA	NA	NA	NA	NA	NA
prad_cdk12_mskcc_2020	P-0021853	P-0021853-T01-IM6	prad_cdk12_mskcc_2020:P-0021853-T01-IM6	prad_cdk12_mskcc_2020:P-0021853	0	NO	Prostate Cancer	Prostate Adenocarcinoma	0.0563	IMPACT468	MSKCC	Bone	MICROSATELLITE STABLE (MSS). This result is for investigational use only. See MSI note below.	0	Stable	6	PRAD	Prostate	Tumor	1	926	Metastasis	Male	Matched	5.18819	10	NA	NA	NA	NA	NA	NA	NA	NA	NA	NA	NA	NA	NA	NA	NA	NA	NA	NA	NA	NA	NA	NA	NA
prad_cdk12_mskcc_2020	P-0021922	P-0021922-T01-IM6	prad_cdk12_mskcc_2020:P-0021922-T01-IM6	prad_cdk12_mskcc_2020:P-0021922	0	NO	Prostate Cancer	Prostate Adenocarcinoma	0.2774	IMPACT468	MSKCC	Lymph Node	MICROSATELLITE STABLE (MSS). See MSI note below.	1.05	Stable	3	PRAD	Prostate	Tumor	1	651	Metastasis	Male	Matched	2.59409	70	NA	NA	NA	NA	NA	NA	NA	NA	NA	NA	NA	NA	NA	NA	NA	NA	NA	NA	NA	NA	NA	NA	NA
prad_cdk12_mskcc_2020	P-0021927	P-0021927-T01-IM6	prad_cdk12_mskcc_2020:P-0021927-T01-IM6	prad_cdk12_mskcc_2020:P-0021927	0	YES	Prostate Cancer	Prostate Adenocarcinoma	0.2064	IMPACT468	MSKCC	Chest Wall	MICROSATELLITE STABLE (MSS). See MSI note below.	0.71	Stable	5	PRAD	Prostate	Tumor	1	343	Metastasis	Male	Matched	3.45879	50	NA	NA	NA	NA	NA	NA	NA	NA	NA	NA	NA	NA	NA	NA	NA	NA	NA	NA	NA	NA	NA	NA	NA
prad_cdk12_mskcc_2020	P-0021928	P-0021928-T01-IM6	prad_cdk12_mskcc_2020:P-0021928-T01-IM6	prad_cdk12_mskcc_2020:P-0021928	0	NO	Prostate Cancer	Prostate Adenocarcinoma	0.1943	IMPACT468	MSKCC	Rib	MICROSATELLITE STABLE (MSS). See MSI note below.	1.3	Stable	4	PRAD	Prostate	Tumor	1	874	Metastasis	Male	Matched	3.45879	90	NA	NA	NA	NA	NA	NA	NA	NA	NA	NA	NA	NA	NA	NA	NA	NA	NA	NA	NA	NA	NA	NA	NA
prad_cdk12_mskcc_2020	P-0022099	P-0022099-T01-IM6	prad_cdk12_mskcc_2020:P-0022099-T01-IM6	prad_cdk12_mskcc_2020:P-0022099	0	NO	Prostate Cancer	Prostate Adenocarcinoma	0.0325	IMPACT468	MSKCC	Bone	MICROSATELLITE STABLE (MSS). See MSI note below.	0	Stable	4	PRAD	Prostate	Tumor	1	754	Metastasis	Male	Matched	3.45879	10	NA	NA	NA	NA	NA	NA	NA	NA	NA	NA	NA	NA	NA	NA	NA	NA	NA	NA	NA	NA	NA	NA	NA
prad_cdk12_mskcc_2020	P-0022117	P-0022117-T01-IM6	prad_cdk12_mskcc_2020:P-0022117-T01-IM6	prad_cdk12_mskcc_2020:P-0022117	0	NO	Prostate Cancer	Prostate Adenocarcinoma	0.3747	IMPACT468	MSKCC	Bone	MICROSATELLITE STABLE (MSS). See MSI note below.	1.61	Stable	4	PRAD	Prostate	Tumor	1	342	Metastasis	Male	Matched	3.45879	20	NA	NA	NA	NA	NA	NA	NA	NA	NA	NA	NA	NA	NA	NA	NA	NA	NA	NA	NA	NA	NA	NA	NA
prad_cdk12_mskcc_2020	P-0022197	P-0022197-T01-IM6	prad_cdk12_mskcc_2020:P-0022197-T01-IM6	prad_cdk12_mskcc_2020:P-0022197	0	NO	Prostate Cancer	Prostate Adenocarcinoma	0.3458	IMPACT468	MSKCC	Bone	MICROSATELLITE STABLE (MSS). See MSI note below.	0	Stable	3	PRAD	Prostate	Tumor	1	559	Metastasis	Male	Matched	2.59409	20	NA	NA	NA	NA	NA	NA	NA	NA	NA	NA	NA	NA	NA	NA	NA	NA	NA	NA	NA	NA	NA	NA	NA
prad_cdk12_mskcc_2020	P-0022252	P-0022252-T01-IM6	prad_cdk12_mskcc_2020:P-0022252-T01-IM6	prad_cdk12_mskcc_2020:P-0022252	0	NO	Prostate Cancer	Prostate Adenocarcinoma	0.2897	IMPACT468	MSKCC	Lymph Node	MICROSATELLITE STABLE (MSS). See MSI note below.	0.39	Stable	4	PRAD	Prostate	Tumor	1	828	Metastasis	Male	Matched	3.45879	60	NA	NA	NA	NA	NA	NA	NA	NA	NA	NA	NA	NA	NA	NA	NA	NA	NA	NA	NA	NA	NA	NA	NA
prad_cdk12_mskcc_2020	P-0022340	P-0022340-T01-IM6	prad_cdk12_mskcc_2020:P-0022340-T01-IM6	prad_cdk12_mskcc_2020:P-0022340	0	NO	Prostate Cancer	Prostate Adenocarcinoma	0.3958	IMPACT468	MSKCC	Lymph Node	MICROSATELLITE STABLE (MSS). See MSI note below.	1.4	Stable	3	PRAD	Prostate	Tumor	1	667	Metastasis	Male	Matched	2.59409	30	NA	NA	NA	NA	NA	NA	NA	NA	NA	NA	NA	NA	NA	NA	NA	NA	NA	NA	NA	NA	NA	NA	NA
prad_cdk12_mskcc_2020	P-0022406	P-0022406-T01-IM6	prad_cdk12_mskcc_2020:P-0022406-T01-IM6	prad_cdk12_mskcc_2020:P-0022406	0	NO	Prostate Cancer	Prostate Adenocarcinoma	0.0742	IMPACT468	MSKCC	Bone	MICROSATELLITE STABLE (MSS). See MSI note below.	0.05	Stable	NA	PRAD	Prostate	Tumor	1	818	Metastasis	Male	Matched	0	20	NA	NA	NA	NA	NA	NA	NA	NA	NA	NA	NA	NA	NA	NA	NA	NA	NA	NA	NA	NA	NA	NA	NA
prad_cdk12_mskcc_2020	P-0022420	P-0022420-T01-IM6	prad_cdk12_mskcc_2020:P-0022420-T01-IM6	prad_cdk12_mskcc_2020:P-0022420	0	NO	Prostate Cancer	Prostate Adenocarcinoma	0.2496	IMPACT468	MSKCC	Bladder	MICROSATELLITE STABLE (MSS). See MSI note below.	0.85	Stable	4	PRAD	Prostate	Tumor	1	495	Metastasis	Male	Matched	3.45879	70	NA	NA	NA	NA	NA	NA	NA	NA	NA	NA	NA	NA	NA	NA	NA	NA	NA	NA	NA	NA	NA	NA	NA
prad_cdk12_mskcc_2020	P-0022430	P-0022430-T01-IM6	prad_cdk12_mskcc_2020:P-0022430-T01-IM6	prad_cdk12_mskcc_2020:P-0022430	0	NO	Prostate Cancer	Prostate Adenocarcinoma	0.2932	IMPACT468	MSKCC	Rib	MICROSATELLITE STABLE (MSS). See MSI note below.	0.77	Stable	8	PRAD	Prostate	Tumor	1	853	Metastasis	Male	Matched	6.91758	50	NA	NA	NA	NA	NA	NA	NA	NA	NA	NA	NA	NA	NA	NA	NA	NA	NA	NA	NA	NA	NA	NA	NA
prad_cdk12_mskcc_2020	P-0022437	P-0022437-T01-IM6	prad_cdk12_mskcc_2020:P-0022437-T01-IM6	prad_cdk12_mskcc_2020:P-0022437	0	NO	Prostate Cancer	Prostate Adenocarcinoma	0.4304	IMPACT468	MSKCC	Liver	MICROSATELLITE STABLE (MSS). See MSI note below.	2.48	Stable	4	PRAD	Prostate	Tumor	1	678	Metastasis	Male	Matched	3.45879	40	NA	NA	NA	NA	NA	NA	NA	NA	NA	NA	NA	NA	NA	NA	NA	NA	NA	NA	NA	NA	NA	NA	NA
prad_cdk12_mskcc_2020	P-0022439	P-0022439-T02-IM6	prad_cdk12_mskcc_2020:P-0022439-T02-IM6	prad_cdk12_mskcc_2020:P-0022439	0	NO	Prostate Cancer	Prostate Adenocarcinoma	0.1567	IMPACT468	MSKCC	Lymph Node	MICROSATELLITE STABLE (MSS). See MSI note below.	0.18	Stable	1	PRAD	Prostate	Tumor	1	769	Metastasis	Male	Matched	0.864698	30	NA	NA	NA	NA	NA	NA	NA	NA	NA	NA	NA	NA	NA	NA	NA	NA	NA	NA	NA	NA	NA	NA	NA
prad_cdk12_mskcc_2020	P-0022482	P-0022482-T01-IM6	prad_cdk12_mskcc_2020:P-0022482-T01-IM6	prad_cdk12_mskcc_2020:P-0022482	0	YES	Prostate Cancer	Prostate Adenocarcinoma	0.1543	IMPACT468	MSKCC	Soft Tissue	MICROSATELLITE STABLE (MSS). See MSI note below.	0.06	Stable	3	PRAD	Prostate	Tumor	1	1030	Metastasis	Female	Matched	2.59409	20	NA	NA	NA	NA	NA	NA	NA	NA	NA	NA	NA	NA	NA	NA	NA	NA	NA	NA	NA	NA	NA	NA	NA
prad_cdk12_mskcc_2020	P-0022584	P-0022584-T02-IM6	prad_cdk12_mskcc_2020:P-0022584-T02-IM6	prad_cdk12_mskcc_2020:P-0022584	0	NO	Prostate Cancer	Prostate Adenocarcinoma	0.0974	IMPACT468	MSKCC	Lymph Node	MICROSATELLITE STABLE (MSS). See MSI note below.	0.15	Stable	1	PRAD	Prostate	Tumor	1	733	Metastasis	Male	Matched	0.864698	30	NA	NA	NA	NA	NA	NA	NA	NA	NA	NA	NA	NA	NA	NA	NA	NA	NA	NA	NA	NA	NA	NA	NA
prad_cdk12_mskcc_2020	P-0022611	P-0022611-T01-IM6	prad_cdk12_mskcc_2020:P-0022611-T01-IM6	prad_cdk12_mskcc_2020:P-0022611	0	NO	Prostate Cancer	Prostate Adenocarcinoma	0.3425	IMPACT468	MSKCC	Lung	MICROSATELLITE STABLE (MSS). See MSI note below.	1.28	Stable	8	PRAD	Prostate	Tumor	1	722	Metastasis	Male	Matched	6.91758	50	NA	NA	NA	NA	NA	NA	NA	NA	NA	NA	NA	NA	NA	NA	NA	NA	NA	NA	NA	NA	NA	NA	NA
prad_cdk12_mskcc_2020	P-0022672	P-0022672-T01-IM6	prad_cdk12_mskcc_2020:P-0022672-T01-IM6	prad_cdk12_mskcc_2020:P-0022672	0	NO	Prostate Cancer	Prostate Adenocarcinoma	0.1571	IMPACT468	MSKCC	Lymph Node	MICROSATELLITE STABLE (MSS). See MSI note below.	0.28	Stable	3	PRAD	Prostate	Tumor	1	750	Metastasis	Male	Matched	2.59409	30	NA	NA	NA	NA	NA	NA	NA	NA	NA	NA	NA	NA	NA	NA	NA	NA	NA	NA	NA	NA	NA	NA	NA
prad_cdk12_mskcc_2020	P-0022707	P-0022707-T01-IM6	prad_cdk12_mskcc_2020:P-0022707-T01-IM6	prad_cdk12_mskcc_2020:P-0022707	0	NO	Prostate Cancer	Prostate Adenocarcinoma	0.2618	IMPACT468	MSKCC	Bone	MICROSATELLITE STABLE (MSS). See MSI note below.	0.75	Stable	5	PRAD	Prostate	Tumor	1	792	Metastasis	Male	Matched	4.32349	40	NA	NA	NA	NA	NA	NA	NA	NA	NA	NA	NA	NA	NA	NA	NA	NA	NA	NA	NA	NA	NA	NA	NA
prad_cdk12_mskcc_2020	P-0022782	P-0022782-T01-IM6	prad_cdk12_mskcc_2020:P-0022782-T01-IM6	prad_cdk12_mskcc_2020:P-0022782	0	NO	Prostate Cancer	Prostate Adenocarcinoma	0.1634	IMPACT468	MSKCC	Retroperitoneum	MICROSATELLITE STABLE (MSS). See MSI note below.	0.13	Stable	NA	PRAD	Prostate	Tumor	1	563	Metastasis	Male	Matched	0	20	NA	NA	NA	NA	NA	NA	NA	NA	NA	NA	NA	NA	NA	NA	NA	NA	NA	NA	NA	NA	NA	NA	NA
prad_cdk12_mskcc_2020	P-0022825	P-0022825-T01-IM6	prad_cdk12_mskcc_2020:P-0022825-T01-IM6	prad_cdk12_mskcc_2020:P-0022825	0	NO	Prostate Cancer	Prostate Adenocarcinoma	0.5218	IMPACT468	MSKCC	Bone	MICROSATELLITE STABLE (MSS). See MSI note below.	0.73	Stable	3	PRAD	Prostate	Tumor	1	642	Metastasis	Male	Matched	2.59409	40	NA	NA	NA	NA	NA	NA	NA	NA	NA	NA	NA	NA	NA	NA	NA	NA	NA	NA	NA	NA	NA	NA	NA
prad_cdk12_mskcc_2020	P-0022905	P-0022905-T01-IM6	prad_cdk12_mskcc_2020:P-0022905-T01-IM6	prad_cdk12_mskcc_2020:P-0022905	0	NO	Prostate Cancer	Prostate Adenocarcinoma	0.064	IMPACT468	MSKCC	Bone	MICROSATELLITE STABLE (MSS). See MSI note below.	0.05	Stable	NA	PRAD	Prostate	Tumor	1	660	Metastasis	Male	Matched	0	10	NA	NA	NA	NA	NA	NA	NA	NA	NA	NA	NA	NA	NA	NA	NA	NA	NA	NA	NA	NA	NA	NA	NA
prad_cdk12_mskcc_2020	P-0022911	P-0022911-T01-IM6	prad_cdk12_mskcc_2020:P-0022911-T01-IM6	prad_cdk12_mskcc_2020:P-0022911	0	NO	Prostate Cancer	Prostate Adenocarcinoma	0.008	IMPACT468	MSKCC	Bone	MICROSATELLITE STABLE (MSS). See MSI note below.	0	Stable	2	PRAD	Prostate	Tumor	1	597	Metastasis	Male	Matched	1.7294	10	NA	NA	NA	NA	NA	NA	NA	NA	NA	NA	NA	NA	NA	NA	NA	NA	NA	NA	NA	NA	NA	NA	NA
prad_cdk12_mskcc_2020	P-0023027	P-0023027-T01-IM6	prad_cdk12_mskcc_2020:P-0023027-T01-IM6	prad_cdk12_mskcc_2020:P-0023027	0	NO	Prostate Cancer	Prostate Adenocarcinoma	0.0167	IMPACT468	MSKCC	Bone	MICROSATELLITE STABLE (MSS). See MSI note below.	0.05	Stable	NA	PRAD	Prostate	Tumor	1	894	Metastasis	Male	Matched	0	10	NA	NA	NA	NA	NA	NA	NA	NA	NA	NA	NA	NA	NA	NA	NA	NA	NA	NA	NA	NA	NA	NA	NA
prad_cdk12_mskcc_2020	P-0023028	P-0023028-T01-IM6	prad_cdk12_mskcc_2020:P-0023028-T01-IM6	prad_cdk12_mskcc_2020:P-0023028	0	NO	Prostate Cancer	Prostate Adenocarcinoma	0.5672	IMPACT468	MSKCC	Liver	MICROSATELLITE STABLE (MSS). See MSI note below.	2.01	Stable	2	PRAD	Prostate	Tumor	1	963	Metastasis	Male	Matched	1.7294	50	NA	NA	NA	NA	NA	NA	NA	NA	NA	NA	NA	NA	NA	NA	NA	NA	NA	NA	NA	NA	NA	NA	NA
prad_cdk12_mskcc_2020	P-0023036	P-0023036-T01-IM6	prad_cdk12_mskcc_2020:P-0023036-T01-IM6	prad_cdk12_mskcc_2020:P-0023036	0	NO	Prostate Cancer	Prostate Adenocarcinoma	0.0188	IMPACT468	MSKCC	Lymph Node	MICROSATELLITE STABLE (MSS). See MSI note below.	0	Stable	NA	PRAD	Prostate	Tumor	1	614	Metastasis	Male	Matched	0	10	NA	NA	NA	NA	NA	NA	NA	NA	NA	NA	NA	NA	NA	NA	NA	NA	NA	NA	NA	NA	NA	NA	NA
prad_cdk12_mskcc_2020	P-0023124	P-0023124-T01-IM6	prad_cdk12_mskcc_2020:P-0023124-T01-IM6	prad_cdk12_mskcc_2020:P-0023124	0	NO	Prostate Cancer	Prostate Adenocarcinoma	0.0701	IMPACT468	MSKCC	Lymph Node	NA	0	Do not report	1	PRAD	Prostate	Tumor	1	559	Metastasis	Male	Matched	0.864698	10	NA	NA	NA	NA	NA	NA	NA	NA	NA	NA	NA	NA	NA	NA	NA	NA	NA	NA	NA	NA	NA	NA	NA
prad_cdk12_mskcc_2020	P-0023170	P-0023170-T01-IM6	prad_cdk12_mskcc_2020:P-0023170-T01-IM6	prad_cdk12_mskcc_2020:P-0023170	0	NO	Prostate Cancer	Prostate Adenocarcinoma	0.3898	IMPACT468	MSKCC	Bone	MICROSATELLITE STABLE (MSS). See MSI note below.	0.37	Stable	2	PRAD	Prostate	Tumor	1	717	Metastasis	Male	Matched	1.7294	30	NA	NA	NA	NA	NA	NA	NA	NA	NA	NA	NA	NA	NA	NA	NA	NA	NA	NA	NA	NA	NA	NA	NA
prad_cdk12_mskcc_2020	P-0023249	P-0023249-T02-IM6	prad_cdk12_mskcc_2020:P-0023249-T02-IM6	prad_cdk12_mskcc_2020:P-0023249	0	NO	Prostate Cancer	Prostate Adenocarcinoma	0.1769	IMPACT468	MSKCC	Brain	MICROSATELLITE STABLE (MSS). See MSI note below.	0.71	Stable	3	PRAD	Prostate	Tumor	1	602	Metastasis	Male	Matched	2.59409	70	NA	NA	NA	NA	NA	NA	NA	NA	NA	NA	NA	NA	NA	NA	NA	NA	NA	NA	NA	NA	NA	NA	NA
prad_cdk12_mskcc_2020	P-0023318	P-0023318-T01-IM6	prad_cdk12_mskcc_2020:P-0023318-T01-IM6	prad_cdk12_mskcc_2020:P-0023318	0	NO	Prostate Cancer	Prostate Adenocarcinoma	0.3511	IMPACT468	MSKCC	Pelvis	MICROSATELLITE STABLE (MSS). See MSI note below.	0.66	Stable	6	PRAD	Prostate	Tumor	1	689	Metastasis	Male	Matched	5.18819	30	NA	NA	NA	NA	NA	NA	NA	NA	NA	NA	NA	NA	NA	NA	NA	NA	NA	NA	NA	NA	NA	NA	NA
prad_cdk12_mskcc_2020	P-0023345	P-0023345-T01-IM6	prad_cdk12_mskcc_2020:P-0023345-T01-IM6	prad_cdk12_mskcc_2020:P-0023345	0	NO	Prostate Cancer	Prostate Adenocarcinoma	0.2961	IMPACT468	MSKCC	Lymph Node	MICROSATELLITE STABLE (MSS). See MSI note below.	0.38	Stable	17	PRAD	Prostate	Tumor	1	602	Metastasis	Male	Matched	14.6999	20	NA	NA	NA	NA	NA	NA	NA	NA	NA	NA	NA	NA	NA	NA	NA	NA	NA	NA	NA	NA	NA	NA	NA
prad_cdk12_mskcc_2020	P-0023346	P-0023346-T01-IM6	prad_cdk12_mskcc_2020:P-0023346-T01-IM6	prad_cdk12_mskcc_2020:P-0023346	0	NO	Prostate Cancer	Prostate Adenocarcinoma	0.0172	IMPACT468	MSKCC	Lymph Node	MICROSATELLITE STABLE (MSS). See MSI note below.	0.08	Stable	NA	PRAD	Prostate	Tumor	1	394	Metastasis	Male	Matched	0	10	NA	NA	NA	NA	NA	NA	NA	NA	NA	NA	NA	NA	NA	NA	NA	NA	NA	NA	NA	NA	NA	NA	NA
prad_cdk12_mskcc_2020	P-0023401	P-0023401-T02-IM6	prad_cdk12_mskcc_2020:P-0023401-T02-IM6	prad_cdk12_mskcc_2020:P-0023401	0	NO	Prostate Cancer	Prostate Adenocarcinoma	0.2764	IMPACT468	MSKCC	Liver	MICROSATELLITE STABLE (MSS). See MSI note below.	0.18	Stable	3	PRAD	Prostate	Tumor	1	664	Metastasis	Male	Matched	2.59409	50	NA	NA	NA	NA	NA	NA	NA	NA	NA	NA	NA	NA	NA	NA	NA	NA	NA	NA	NA	NA	NA	NA	NA
prad_cdk12_mskcc_2020	P-0023419	P-0023419-T01-IM6	prad_cdk12_mskcc_2020:P-0023419-T01-IM6	prad_cdk12_mskcc_2020:P-0023419	0	NO	Prostate Cancer	Prostate Adenocarcinoma	0.6079	IMPACT468	MSKCC	Liver	MICROSATELLITE STABLE (MSS). See MSI note below.	2.38	Stable	2	PRAD	Prostate	Tumor	1	780	Metastasis	Male	Matched	1.7294	70	NA	NA	NA	NA	NA	NA	NA	NA	NA	NA	NA	NA	NA	NA	NA	NA	NA	NA	NA	NA	NA	NA	NA
prad_cdk12_mskcc_2020	P-0023561	P-0023561-T01-IM6	prad_cdk12_mskcc_2020:P-0023561-T01-IM6	prad_cdk12_mskcc_2020:P-0023561	0	NO	Prostate Cancer	Prostate Adenocarcinoma	0.4589	IMPACT468	MSKCC	Bone (Femur)	MICROSATELLITE STABLE (MSS). See MSI note below.	0.26	Stable	4	PRAD	Prostate	Tumor	1	455	Metastasis	Male	Matched	3.45879	60	NA	NA	NA	NA	NA	NA	NA	NA	NA	NA	NA	NA	NA	NA	NA	NA	NA	NA	NA	NA	NA	NA	NA
prad_cdk12_mskcc_2020	P-0023594	P-0023594-T01-IM6	prad_cdk12_mskcc_2020:P-0023594-T01-IM6	prad_cdk12_mskcc_2020:P-0023594	0	NO	Prostate Cancer	Prostate Adenocarcinoma	0.227	IMPACT468	MSKCC	Retroperitoneum	MICROSATELLITE STABLE (MSS). See MSI note below.	0	Stable	5	PRAD	Prostate	Tumor	1	789	Metastasis	Male	Matched	4.32349	30	NA	NA	NA	NA	NA	NA	NA	NA	NA	NA	NA	NA	NA	NA	NA	NA	NA	NA	NA	NA	NA	NA	NA
prad_cdk12_mskcc_2020	P-0023621	P-0023621-T01-IM6	prad_cdk12_mskcc_2020:P-0023621-T01-IM6	prad_cdk12_mskcc_2020:P-0023621	0	NO	Prostate Cancer	Prostate Adenocarcinoma	0.0364	IMPACT468	MSKCC	Lymph Node	MICROSATELLITE STABLE (MSS). See MSI note below.	0	Stable	4	PRAD	Prostate	Tumor	1	784	Metastasis	Male	Matched	3.45879	20	NA	NA	NA	NA	NA	NA	NA	NA	NA	NA	NA	NA	NA	NA	NA	NA	NA	NA	NA	NA	NA	NA	NA
prad_cdk12_mskcc_2020	P-0023629	P-0023629-T01-IM6	prad_cdk12_mskcc_2020:P-0023629-T01-IM6	prad_cdk12_mskcc_2020:P-0023629	0	NO	Prostate Cancer	Prostate Adenocarcinoma	0.0022	IMPACT468	MSKCC	Liver	MICROSATELLITE STABLE (MSS). See MSI note below.	0	Stable	1	PRAD	Prostate	Tumor	1	402	Metastasis	Male	Matched	0.864698	10	NA	NA	NA	NA	NA	NA	NA	NA	NA	NA	NA	NA	NA	NA	NA	NA	NA	NA	NA	NA	NA	NA	NA
prad_cdk12_mskcc_2020	P-0023666	P-0023666-T01-IM6	prad_cdk12_mskcc_2020:P-0023666-T01-IM6	prad_cdk12_mskcc_2020:P-0023666	0	NO	Prostate Cancer	Prostate Adenocarcinoma	0.1344	IMPACT468	MSKCC	Bone	MICROSATELLITE STABLE (MSS). See MSI note below.	0.64	Stable	5	PRAD	Prostate	Tumor	1	420	Metastasis	Male	Matched	4.32349	40	NA	NA	NA	NA	NA	NA	NA	NA	NA	NA	NA	NA	NA	NA	NA	NA	NA	NA	NA	NA	NA	NA	NA
prad_cdk12_mskcc_2020	P-0023730	P-0023730-T01-IM6	prad_cdk12_mskcc_2020:P-0023730-T01-IM6	prad_cdk12_mskcc_2020:P-0023730	0	NO	Prostate Cancer	Prostate Adenocarcinoma	0.0023	IMPACT468	MSKCC	Lymph Node	NA	0	Do not report	NA	PRAD	Prostate	Tumor	1	470	Metastasis	Male	Matched	0	10	NA	NA	NA	NA	NA	NA	NA	NA	NA	NA	NA	NA	NA	NA	NA	NA	NA	NA	NA	NA	NA	NA	NA
prad_cdk12_mskcc_2020	P-0023741	P-0023741-T01-IM6	prad_cdk12_mskcc_2020:P-0023741-T01-IM6	prad_cdk12_mskcc_2020:P-0023741	0	NO	Prostate Cancer	Prostate Adenocarcinoma	0.4321	IMPACT468	MSKCC	Pelvis	MICROSATELLITE STABLE (MSS). See MSI note below.	0.3	Stable	7	PRAD	Prostate	Tumor	1	692	Metastasis	Male	Matched	6.05289	20	NA	NA	NA	NA	NA	NA	NA	NA	NA	NA	NA	NA	NA	NA	NA	NA	NA	NA	NA	NA	NA	NA	NA
prad_cdk12_mskcc_2020	P-0023838	P-0023838-T01-IM6	prad_cdk12_mskcc_2020:P-0023838-T01-IM6	prad_cdk12_mskcc_2020:P-0023838	0	NO	Prostate Cancer	Prostate Adenocarcinoma	0.399	IMPACT468	MSKCC	Retroperitoneum	MICROSATELLITE STABLE (MSS). See MSI note below.	0.19	Stable	3	PRAD	Prostate	Tumor	1	371	Metastasis	Male	Matched	2.59409	40	NA	NA	NA	NA	NA	NA	NA	NA	NA	NA	NA	NA	NA	NA	NA	NA	NA	NA	NA	NA	NA	NA	NA
prad_cdk12_mskcc_2020	P-0023839	P-0023839-T02-IM6	prad_cdk12_mskcc_2020:P-0023839-T02-IM6	prad_cdk12_mskcc_2020:P-0023839	0	NO	Prostate Cancer	Prostate Adenocarcinoma	0.0436	IMPACT468	MSKCC	Lymph node	MICROSATELLITE STABLE (MSS). See MSI note below.	0	Stable	4	PRAD	Prostate	Tumor	1	635	Metastasis	Male	Matched	3.45879	10	NA	NA	NA	NA	NA	NA	NA	NA	NA	NA	NA	NA	NA	NA	NA	NA	NA	NA	NA	NA	NA	NA	NA
prad_cdk12_mskcc_2020	P-0023866	P-0023866-T01-IM6	prad_cdk12_mskcc_2020:P-0023866-T01-IM6	prad_cdk12_mskcc_2020:P-0023866	0	NO	Prostate Cancer	Prostate Adenocarcinoma	0.3089	IMPACT468	MSKCC	Lymph Node	MICROSATELLITE STABLE (MSS). See MSI note below.	1.29	Stable	4	PRAD	Prostate	Tumor	1	705	Metastasis	Male	Matched	3.45879	40	NA	NA	NA	NA	NA	NA	NA	NA	NA	NA	NA	NA	NA	NA	NA	NA	NA	NA	NA	NA	NA	NA	NA
prad_cdk12_mskcc_2020	P-0023874	P-0023874-T01-IM6	prad_cdk12_mskcc_2020:P-0023874-T01-IM6	prad_cdk12_mskcc_2020:P-0023874	0	NO	Prostate Cancer	Prostate Adenocarcinoma	0.0011	IMPACT468	MSKCC	Bone	MICROSATELLITE STABLE (MSS). See MSI note below.	0	Stable	3	PRAD	Prostate	Tumor	1	348	Metastasis	Male	Matched	2.59409	10	NA	NA	NA	NA	NA	NA	NA	NA	NA	NA	NA	NA	NA	NA	NA	NA	NA	NA	NA	NA	NA	NA	NA
prad_cdk12_mskcc_2020	P-0023958	P-0023958-T02-IM6	prad_cdk12_mskcc_2020:P-0023958-T02-IM6	prad_cdk12_mskcc_2020:P-0023958	0	NO	Prostate Cancer	Prostate Adenocarcinoma	0.7331	IMPACT468	MSKCC	Brain	MICROSATELLITE STABLE (MSS). See MSI note below.	1.78	Stable	3	PRAD	Prostate	Tumor	1	567	Metastasis	Male	Matched	2.59409	80	NA	NA	NA	NA	NA	NA	NA	NA	NA	NA	NA	NA	NA	NA	NA	NA	NA	NA	NA	NA	NA	NA	NA
prad_cdk12_mskcc_2020	P-0023961	P-0023961-T01-IM6	prad_cdk12_mskcc_2020:P-0023961-T01-IM6	prad_cdk12_mskcc_2020:P-0023961	0	NO	Prostate Cancer	Prostate Adenocarcinoma	0.3092	IMPACT468	MSKCC	Lymph Node	MICROSATELLITE STABLE (MSS). See MSI note below.	0.38	Stable	3	PRAD	Prostate	Tumor	1	761	Metastasis	Male	Matched	2.59409	20	NA	NA	NA	NA	NA	NA	NA	NA	NA	NA	NA	NA	NA	NA	NA	NA	NA	NA	NA	NA	NA	NA	NA
prad_cdk12_mskcc_2020	P-0023967	P-0023967-T01-IM6	prad_cdk12_mskcc_2020:P-0023967-T01-IM6	prad_cdk12_mskcc_2020:P-0023967	0	NO	Prostate Cancer	Prostate Adenocarcinoma	0.0425	IMPACT468	MSKCC	Lymph Node	MICROSATELLITE STABLE (MSS). See MSI note below.	0	Stable	1	PRAD	Prostate	Tumor	1	587	Metastasis	Male	Matched	0.864698	10	NA	NA	NA	NA	NA	NA	NA	NA	NA	NA	NA	NA	NA	NA	NA	NA	NA	NA	NA	NA	NA	NA	NA
prad_cdk12_mskcc_2020	P-0024028	P-0024028-T01-IM6	prad_cdk12_mskcc_2020:P-0024028-T01-IM6	prad_cdk12_mskcc_2020:P-0024028	0	NO	Prostate Cancer	Prostate Adenocarcinoma	0.0006	IMPACT468	MSKCC	Bone	NA	0	Do not report	NA	PRAD	Prostate	Tumor	1	514	Metastasis	Male	Matched	0	10	NA	NA	NA	NA	NA	NA	NA	NA	NA	NA	NA	NA	NA	NA	NA	NA	NA	NA	NA	NA	NA	NA	NA
prad_cdk12_mskcc_2020	P-0024076	P-0024076-T02-IM6	prad_cdk12_mskcc_2020:P-0024076-T02-IM6	prad_cdk12_mskcc_2020:P-0024076	0	NO	Prostate Cancer	Prostate Adenocarcinoma	0.212	IMPACT468	MSKCC	Epidural	MICROSATELLITE STABLE (MSS). See MSI note below.	0.14	Stable	3	PRAD	Prostate	Tumor	1	723	Metastasis	Male	Matched	2.59409	60	NA	NA	NA	NA	NA	NA	NA	NA	NA	NA	NA	NA	NA	NA	NA	NA	NA	NA	NA	NA	NA	NA	NA
prad_cdk12_mskcc_2020	P-0024080	P-0024080-T02-IM6	prad_cdk12_mskcc_2020:P-0024080-T02-IM6	prad_cdk12_mskcc_2020:P-0024080	0	NO	Prostate Cancer	Prostate Adenocarcinoma	0.5214	IMPACT468	MSKCC	Bone	MICROSATELLITE STABLE (MSS). See MSI note below.	1.26	Stable	3	PRAD	Prostate	Tumor	1	905	Metastasis	Male	Matched	2.59409	60	NA	NA	NA	NA	NA	NA	NA	NA	NA	NA	NA	NA	NA	NA	NA	NA	NA	NA	NA	NA	NA	NA	NA
prad_cdk12_mskcc_2020	P-0024087	P-0024087-T01-IM6	prad_cdk12_mskcc_2020:P-0024087-T01-IM6	prad_cdk12_mskcc_2020:P-0024087	0	NO	Prostate Cancer	Prostate Adenocarcinoma	0.0785	IMPACT468	MSKCC	Bone	MICROSATELLITE STABLE (MSS). See MSI note below.	0	Stable	1	PRAD	Prostate	Tumor	1	760	Metastasis	Male	Matched	0.864698	20	NA	NA	NA	NA	NA	NA	NA	NA	NA	NA	NA	NA	NA	NA	NA	NA	NA	NA	NA	NA	NA	NA	NA
prad_cdk12_mskcc_2020	P-0024117	P-0024117-T01-IM6	prad_cdk12_mskcc_2020:P-0024117-T01-IM6	prad_cdk12_mskcc_2020:P-0024117	0	NO	Prostate Cancer	Prostate Adenocarcinoma	0.356	IMPACT468	MSKCC	Lymph Node	MICROSATELLITE STABLE (MSS). See MSI note below.	0.37	Stable	3	PRAD	Prostate	Tumor	1	706	Metastasis	Male	Matched	2.59409	30	NA	NA	NA	NA	NA	NA	NA	NA	NA	NA	NA	NA	NA	NA	NA	NA	NA	NA	NA	NA	NA	NA	NA
prad_cdk12_mskcc_2020	P-0024217	P-0024217-T02-IM6	prad_cdk12_mskcc_2020:P-0024217-T02-IM6	prad_cdk12_mskcc_2020:P-0024217	0	NO	Prostate Cancer	Prostate Adenocarcinoma	0.0288	IMPACT468	MSKCC	Lymph Node	MICROSATELLITE STABLE (MSS). See MSI note below.	0	Stable	3	PRAD	Prostate	Tumor	1	1035	Metastasis	Male	Matched	2.59409	30	NA	NA	NA	NA	NA	NA	NA	NA	NA	NA	NA	NA	NA	NA	NA	NA	NA	NA	NA	NA	NA	NA	NA
prad_cdk12_mskcc_2020	P-0024325	P-0024325-T02-IM6	prad_cdk12_mskcc_2020:P-0024325-T02-IM6	prad_cdk12_mskcc_2020:P-0024325	0	NO	Prostate Cancer	Prostate Adenocarcinoma	0.0843	IMPACT468	MSKCC	Retroperitoneum	MICROSATELLITE STABLE (MSS). See MSI note below.	0.33	Stable	2	PRAD	Prostate	Tumor	1	687	Metastasis	Male	Matched	1.7294	70	NA	NA	NA	NA	NA	NA	NA	NA	NA	NA	NA	NA	NA	NA	NA	NA	NA	NA	NA	NA	NA	NA	NA
prad_cdk12_mskcc_2020	P-0024522	P-0024522-T01-IM6	prad_cdk12_mskcc_2020:P-0024522-T01-IM6	prad_cdk12_mskcc_2020:P-0024522	0	NO	Prostate Cancer	Prostate Adenocarcinoma	0.16	IMPACT468	MSKCC	Bone	MICROSATELLITE STABLE (MSS). See MSI note below.	0	Stable	2	PRAD	Prostate	Tumor	1	567	Metastasis	Male	Matched	1.7294	30	NA	NA	NA	NA	NA	NA	NA	NA	NA	NA	NA	NA	NA	NA	NA	NA	NA	NA	NA	NA	NA	NA	NA
prad_cdk12_mskcc_2020	P-0024534	P-0024534-T01-IM6	prad_cdk12_mskcc_2020:P-0024534-T01-IM6	prad_cdk12_mskcc_2020:P-0024534	0	NO	Prostate Cancer	Prostate Adenocarcinoma	0.4888	IMPACT468	MSKCC	Lymph Node	MICROSATELLITE STABLE (MSS). See MSI note below.	0.88	Stable	4	PRAD	Prostate	Tumor	1	665	Metastasis	Male	Matched	3.45879	80	NA	NA	NA	NA	NA	NA	NA	NA	NA	NA	NA	NA	NA	NA	NA	NA	NA	NA	NA	NA	NA	NA	NA
prad_cdk12_mskcc_2020	P-0024538	P-0024538-T01-IM6	prad_cdk12_mskcc_2020:P-0024538-T01-IM6	prad_cdk12_mskcc_2020:P-0024538	0	NO	Prostate Cancer	Prostate Adenocarcinoma	0.1595	IMPACT468	MSKCC	Lymph Node	MICROSATELLITE STABLE (MSS). See MSI note below.	0.94	Stable	6	PRAD	Prostate	Tumor	1	508	Metastasis	Male	Matched	5.18819	70	NA	NA	NA	NA	NA	NA	NA	NA	NA	NA	NA	NA	NA	NA	NA	NA	NA	NA	NA	NA	NA	NA	NA
prad_cdk12_mskcc_2020	P-0024554	P-0024554-T01-IM6	prad_cdk12_mskcc_2020:P-0024554-T01-IM6	prad_cdk12_mskcc_2020:P-0024554	0	NO	Prostate Cancer	Prostate Adenocarcinoma	0.4199	IMPACT468	MSKCC	Liver	MICROSATELLITE STABLE (MSS). See MSI note below.	1.3	Stable	3	PRAD	Prostate	Tumor	1	817	Metastasis	NA	Matched	2.59409	60	NA	NA	NA	NA	NA	NA	NA	NA	NA	NA	NA	NA	NA	NA	NA	NA	NA	NA	NA	NA	NA	NA	NA
prad_cdk12_mskcc_2020	P-0024589	P-0024589-T02-IM6	prad_cdk12_mskcc_2020:P-0024589-T02-IM6	prad_cdk12_mskcc_2020:P-0024589	0	NO	Prostate Cancer	Prostate Adenocarcinoma	0.3399	IMPACT468	MSKCC	Bone	MICROSATELLITE STABLE (MSS). See MSI note below.	0.1	Stable	1	PRAD	Prostate	Tumor	1	536	Metastasis	Male	Matched	0.864698	50	NA	NA	NA	NA	NA	NA	NA	NA	NA	NA	NA	NA	NA	NA	NA	NA	NA	NA	NA	NA	NA	NA	NA
prad_cdk12_mskcc_2020	P-0024598	P-0024598-T02-IM6	prad_cdk12_mskcc_2020:P-0024598-T02-IM6	prad_cdk12_mskcc_2020:P-0024598	0	NO	Prostate Cancer	Prostate Adenocarcinoma	0.1502	IMPACT468	MSKCC	Lung	MICROSATELLITE STABLE (MSS). See MSI note below.	0.42	Stable	2	PRAD	Prostate	Tumor	1	748	Metastasis	Male	Matched	1.7294	50	NA	NA	NA	NA	NA	NA	NA	NA	NA	NA	NA	NA	NA	NA	NA	NA	NA	NA	NA	NA	NA	NA	NA
prad_cdk12_mskcc_2020	P-0024686	P-0024686-T01-IM6	prad_cdk12_mskcc_2020:P-0024686-T01-IM6	prad_cdk12_mskcc_2020:P-0024686	0	NO	Prostate Cancer	Prostate Adenocarcinoma	0.1174	IMPACT468	MSKCC	Bone	MICROSATELLITE STABLE (MSS). See MSI note below.	0.12	Stable	4	PRAD	Prostate	Tumor	1	758	Metastasis	Male	Matched	3.45879	10	NA	NA	NA	NA	NA	NA	NA	NA	NA	NA	NA	NA	NA	NA	NA	NA	NA	NA	NA	NA	NA	NA	NA
prad_cdk12_mskcc_2020	P-0024762	P-0024762-T01-IM6	prad_cdk12_mskcc_2020:P-0024762-T01-IM6	prad_cdk12_mskcc_2020:P-0024762	0	NO	Prostate Cancer	Prostate Adenocarcinoma	0.1707	IMPACT468	MSKCC	Pelvis	MICROSATELLITE STABLE (MSS). See MSI note below.	0.35	Stable	2	PRAD	Prostate	Tumor	1	826	Metastasis	Male	Matched	1.7294	30	NA	NA	NA	NA	NA	NA	NA	NA	NA	NA	NA	NA	NA	NA	NA	NA	NA	NA	NA	NA	NA	NA	NA
prad_cdk12_mskcc_2020	P-0024898	P-0024898-T01-IM6	prad_cdk12_mskcc_2020:P-0024898-T01-IM6	prad_cdk12_mskcc_2020:P-0024898	0	NO	Prostate Cancer	Prostate Adenocarcinoma	0.0666	IMPACT468	MSKCC	Pelvis	MICROSATELLITE STABLE (MSS). See MSI note below.	0.12	Stable	2	PRAD	Prostate	Tumor	1	527	Metastasis	Male	Matched	1.7294	30	NA	NA	NA	NA	NA	NA	NA	NA	NA	NA	NA	NA	NA	NA	NA	NA	NA	NA	NA	NA	NA	NA	NA
prad_cdk12_mskcc_2020	P-0024913	P-0024913-T01-IM6	prad_cdk12_mskcc_2020:P-0024913-T01-IM6	prad_cdk12_mskcc_2020:P-0024913	0	NO	Prostate Cancer	Prostate Adenocarcinoma	0.1664	IMPACT468	MSKCC	lymphnodes	MICROSATELLITE STABLE (MSS). See MSI note below.	0.88	Stable	2	PRAD	Prostate	Tumor	1	672	Metastasis	Male	Matched	1.7294	50	NA	NA	NA	NA	NA	NA	NA	NA	NA	NA	NA	NA	NA	NA	NA	NA	NA	NA	NA	NA	NA	NA	NA
prad_cdk12_mskcc_2020	P-0025044	P-0025044-T01-IM6	prad_cdk12_mskcc_2020:P-0025044-T01-IM6	prad_cdk12_mskcc_2020:P-0025044	0	NO	Prostate Cancer	Prostate Adenocarcinoma	0.2299	IMPACT468	MSKCC	Retroperitoneum	MICROSATELLITE STABLE (MSS). See MSI note below.	0.78	Stable	3	PRAD	Prostate	Tumor	1	832	Metastasis	Male	Matched	2.59409	40	NA	NA	NA	NA	NA	NA	NA	NA	NA	NA	NA	NA	NA	NA	NA	NA	NA	NA	NA	NA	NA	NA	NA
prad_cdk12_mskcc_2020	P-0025077	P-0025077-T02-IM6	prad_cdk12_mskcc_2020:P-0025077-T02-IM6	prad_cdk12_mskcc_2020:P-0025077	0	NO	Prostate Cancer	Prostate Adenocarcinoma	0.2275	IMPACT468	MSKCC	Lymph Node	MICROSATELLITE STABLE (MSS). See MSI note below.	0.13	Stable	2	PRAD	Prostate	Tumor	1	774	Metastasis	Male	Matched	1.7294	40	NA	NA	NA	NA	NA	NA	NA	NA	NA	NA	NA	NA	NA	NA	NA	NA	NA	NA	NA	NA	NA	NA	NA
prad_cdk12_mskcc_2020	P-0025086	P-0025086-T01-IM6	prad_cdk12_mskcc_2020:P-0025086-T01-IM6	prad_cdk12_mskcc_2020:P-0025086	0	NO	Prostate Cancer	Prostate Adenocarcinoma	0.215	IMPACT468	MSKCC	Lymph Node	MICROSATELLITE STABLE (MSS). See MSI note below.	0	Stable	2	PRAD	Prostate	Tumor	1	727	Metastasis	Male	Matched	1.7294	20	NA	NA	NA	NA	NA	NA	NA	NA	NA	NA	NA	NA	NA	NA	NA	NA	NA	NA	NA	NA	NA	NA	NA
prad_cdk12_mskcc_2020	P-0025087	P-0025087-T01-IM6	prad_cdk12_mskcc_2020:P-0025087-T01-IM6	prad_cdk12_mskcc_2020:P-0025087	0	NO	Prostate Cancer	Prostate Adenocarcinoma	0.1431	IMPACT468	MSKCC	Bone	MICROSATELLITE STABLE (MSS). See MSI note below.	0.25	Stable	1	PRAD	Prostate	Tumor	1	719	Metastasis	Male	Matched	0.864698	20	NA	NA	NA	NA	NA	NA	NA	NA	NA	NA	NA	NA	NA	NA	NA	NA	NA	NA	NA	NA	NA	NA	NA
prad_cdk12_mskcc_2020	P-0025097	P-0025097-T01-IM6	prad_cdk12_mskcc_2020:P-0025097-T01-IM6	prad_cdk12_mskcc_2020:P-0025097	0	NO	Prostate Cancer	Prostate Adenocarcinoma	0.185	IMPACT468	MSKCC	Pelvis	MICROSATELLITE STABLE (MSS). See MSI note below.	0.71	Stable	7	PRAD	Prostate	Tumor	1	804	Metastasis	Male	Matched	6.05289	50	NA	NA	NA	NA	NA	NA	NA	NA	NA	NA	NA	NA	NA	NA	NA	NA	NA	NA	NA	NA	NA	NA	NA
prad_cdk12_mskcc_2020	P-0025137	P-0025137-T01-IM6	prad_cdk12_mskcc_2020:P-0025137-T01-IM6	prad_cdk12_mskcc_2020:P-0025137	0	NO	Prostate Cancer	Prostate Adenocarcinoma	0.5137	IMPACT468	MSKCC	Retroperitoneum	MICROSATELLITE STABLE (MSS). See MSI note below.	1.51	Stable	3	PRAD	Prostate	Tumor	1	729	Metastasis	Male	Matched	2.59409	50	NA	NA	NA	NA	NA	NA	NA	NA	NA	NA	NA	NA	NA	NA	NA	NA	NA	NA	NA	NA	NA	NA	NA
prad_cdk12_mskcc_2020	P-0025138	P-0025138-T02-IM6	prad_cdk12_mskcc_2020:P-0025138-T02-IM6	prad_cdk12_mskcc_2020:P-0025138	0	NO	Prostate Cancer	Prostate Adenocarcinoma	0.2242	IMPACT468	MSKCC	Liver	MICROSATELLITE STABLE (MSS). See MSI note below.	0.46	Stable	3	PRAD	Prostate	Tumor	1	1011	Metastasis	Male	Matched	2.59409	50	NA	NA	NA	NA	NA	NA	NA	NA	NA	NA	NA	NA	NA	NA	NA	NA	NA	NA	NA	NA	NA	NA	NA
prad_cdk12_mskcc_2020	P-0025139	P-0025139-T01-IM6	prad_cdk12_mskcc_2020:P-0025139-T01-IM6	prad_cdk12_mskcc_2020:P-0025139	0	NO	Prostate Cancer	Prostate Adenocarcinoma	0.2544	IMPACT468	MSKCC	Pelvis	MICROSATELLITE STABLE (MSS). See MSI note below.	0.55	Stable	3	PRAD	Prostate	Tumor	1	732	Metastasis	Male	Matched	2.59409	30	NA	NA	NA	NA	NA	NA	NA	NA	NA	NA	NA	NA	NA	NA	NA	NA	NA	NA	NA	NA	NA	NA	NA
prad_cdk12_mskcc_2020	P-0025153	P-0025153-T01-IM6	prad_cdk12_mskcc_2020:P-0025153-T01-IM6	prad_cdk12_mskcc_2020:P-0025153	0	NO	Prostate Cancer	Prostate Adenocarcinoma	0.1942	IMPACT468	MSKCC	Soft Tissue	MICROSATELLITE STABLE (MSS). See MSI note below.	0.55	Stable	4	PRAD	Prostate	Tumor	1	874	Metastasis	Male	Matched	3.45879	50	NA	NA	NA	NA	NA	NA	NA	NA	NA	NA	NA	NA	NA	NA	NA	NA	NA	NA	NA	NA	NA	NA	NA
prad_cdk12_mskcc_2020	P-0025222	P-0025222-T02-IM6	prad_cdk12_mskcc_2020:P-0025222-T02-IM6	prad_cdk12_mskcc_2020:P-0025222	0	NO	Prostate Cancer	Prostate Adenocarcinoma	0.5069	IMPACT468	MSKCC	Retroperitenium	MICROSATELLITE STABLE (MSS). See MSI note below.	0.31	Stable	5	PRAD	Prostate	Tumor	1	477	Metastasis	Male	Matched	4.32349	40	NA	NA	NA	NA	NA	NA	NA	NA	NA	NA	NA	NA	NA	NA	NA	NA	NA	NA	NA	NA	NA	NA	NA
prad_cdk12_mskcc_2020	P-0025276	P-0025276-T01-IM6	prad_cdk12_mskcc_2020:P-0025276-T01-IM6	prad_cdk12_mskcc_2020:P-0025276	0	NO	Prostate Cancer	Prostate Adenocarcinoma	0.1361	IMPACT468	MSKCC	Bone	MICROSATELLITE STABLE (MSS). See MSI note below.	0.06	Stable	7	PRAD	Prostate	Tumor	1	907	Metastasis	Male	Matched	6.05289	20	NA	NA	NA	NA	NA	NA	NA	NA	NA	NA	NA	NA	NA	NA	NA	NA	NA	NA	NA	NA	NA	NA	NA
prad_cdk12_mskcc_2020	P-0025329	P-0025329-T01-IM6	prad_cdk12_mskcc_2020:P-0025329-T01-IM6	prad_cdk12_mskcc_2020:P-0025329	0	NO	Prostate Cancer	Prostate Adenocarcinoma	0.0044	IMPACT468	MSKCC	Lymph node	MICROSATELLITE STABLE (MSS). See MSI note below.	0.06	Stable	3	PRAD	Prostate	Tumor	1	949	Metastasis	Male	Matched	2.59409	20	NA	NA	NA	NA	NA	NA	NA	NA	NA	NA	NA	NA	NA	NA	NA	NA	NA	NA	NA	NA	NA	NA	NA
prad_cdk12_mskcc_2020	P-0025332	P-0025332-T01-IM6	prad_cdk12_mskcc_2020:P-0025332-T01-IM6	prad_cdk12_mskcc_2020:P-0025332	0	NO	Prostate Cancer	Prostate Adenocarcinoma	0.5463	IMPACT468	MSKCC	Lymph Node	MICROSATELLITE STABLE (MSS). See MSI note below.	0.9	Stable	NA	PRAD	Prostate	Tumor	1	858	Metastasis	Male	Matched	0	40	NA	NA	NA	NA	NA	NA	NA	NA	NA	NA	NA	NA	NA	NA	NA	NA	NA	NA	NA	NA	NA	NA	NA
prad_cdk12_mskcc_2020	P-0025414	P-0025414-T01-IM6	prad_cdk12_mskcc_2020:P-0025414-T01-IM6	prad_cdk12_mskcc_2020:P-0025414	0	NO	Prostate Cancer	Prostate Adenocarcinoma	0.252	IMPACT468	MSKCC	Pelvis	MICROSATELLITE STABLE (MSS). See MSI note below.	0.94	Stable	4	PRAD	Prostate	Tumor	1	1041	Metastasis	Male	Matched	3.45879	50	NA	NA	NA	NA	NA	NA	NA	NA	NA	NA	NA	NA	NA	NA	NA	NA	NA	NA	NA	NA	NA	NA	NA
prad_cdk12_mskcc_2020	P-0025494	P-0025494-T01-IM6	prad_cdk12_mskcc_2020:P-0025494-T01-IM6	prad_cdk12_mskcc_2020:P-0025494	0	NO	Prostate Cancer	Prostate Adenocarcinoma	0.6671	IMPACT468	MSKCC	Lymph Node	MICROSATELLITE STABLE (MSS). See MSI note below.	0.56	Stable	1	PRAD	Prostate	Tumor	1	567	Metastasis	Male	Matched	0.864698	50	NA	NA	NA	NA	NA	NA	NA	NA	NA	NA	NA	NA	NA	NA	NA	NA	NA	NA	NA	NA	NA	NA	NA
prad_cdk12_mskcc_2020	P-0025571	P-0025571-T01-IM6	prad_cdk12_mskcc_2020:P-0025571-T01-IM6	prad_cdk12_mskcc_2020:P-0025571	0	NO	Prostate Cancer	Prostate Adenocarcinoma	0.2389	IMPACT468	MSKCC	Bone	MICROSATELLITE STABLE (MSS). See MSI note below.	1.11	Stable	1	PRAD	Prostate	Tumor	1	566	Metastasis	Male	Matched	0.864698	50	NA	NA	NA	NA	NA	NA	NA	NA	NA	NA	NA	NA	NA	NA	NA	NA	NA	NA	NA	NA	NA	NA	NA
prad_cdk12_mskcc_2020	P-0025676	P-0025676-T01-IM6	prad_cdk12_mskcc_2020:P-0025676-T01-IM6	prad_cdk12_mskcc_2020:P-0025676	0	NO	Prostate Cancer	Prostate Adenocarcinoma	0.4941	IMPACT468	MSKCC	Soft Tissue	MICROSATELLITE STABLE (MSS). See MSI note below.	0.77	Stable	3	PRAD	Prostate	Tumor	1	741	Metastasis	Male	Matched	2.59409	90	NA	NA	NA	NA	NA	NA	NA	NA	NA	NA	NA	NA	NA	NA	NA	NA	NA	NA	NA	NA	NA	NA	NA
prad_cdk12_mskcc_2020	P-0025705	P-0025705-T01-IM6	prad_cdk12_mskcc_2020:P-0025705-T01-IM6	prad_cdk12_mskcc_2020:P-0025705	0	NO	Prostate Cancer	Prostate Adenocarcinoma	0.0209	IMPACT468	MSKCC	Epidural	NA	4.51	Do not report	2	PRAD	Prostate	Tumor	1	150	Metastasis	Male	Matched	1.7294	30	NA	NA	NA	NA	NA	NA	NA	NA	NA	NA	NA	NA	NA	NA	NA	NA	NA	NA	NA	NA	NA	NA	NA
prad_cdk12_mskcc_2020	P-0025759	P-0025759-T01-IM6	prad_cdk12_mskcc_2020:P-0025759-T01-IM6	prad_cdk12_mskcc_2020:P-0025759	0	NO	Prostate Cancer	Prostate Adenocarcinoma	0.1502	IMPACT468	MSKCC	Bone	MICROSATELLITE STABLE (MSS). See MSI note below.	0	Stable	2	PRAD	Prostate	Tumor	1	865	Metastasis	Male	Matched	1.7294	20	NA	NA	NA	NA	NA	NA	NA	NA	NA	NA	NA	NA	NA	NA	NA	NA	NA	NA	NA	NA	NA	NA	NA
prad_cdk12_mskcc_2020	P-0025823	P-0025823-T01-IM6	prad_cdk12_mskcc_2020:P-0025823-T01-IM6	prad_cdk12_mskcc_2020:P-0025823	0	NO	Prostate Cancer	Prostate Adenocarcinoma	0.4025	IMPACT468	MSKCC	Lymph node	MICROSATELLITE STABLE (MSS). See MSI note below.	1.31	Stable	2	PRAD	Prostate	Tumor	1	1100	Metastasis	Male	Matched	1.7294	60	NA	NA	NA	NA	NA	NA	NA	NA	NA	NA	NA	NA	NA	NA	NA	NA	NA	NA	NA	NA	NA	NA	NA
prad_cdk12_mskcc_2020	P-0025851	P-0025851-T01-IM6	prad_cdk12_mskcc_2020:P-0025851-T01-IM6	prad_cdk12_mskcc_2020:P-0025851	0	NO	Prostate Cancer	Prostate Adenocarcinoma	0.32	IMPACT468	MSKCC	Lymph Node	MICROSATELLITE STABLE (MSS). See MSI note below.	0.27	Stable	8	PRAD	Prostate	Tumor	1	616	Metastasis	Male	Matched	6.91758	40	NA	NA	NA	NA	NA	NA	NA	NA	NA	NA	NA	NA	NA	NA	NA	NA	NA	NA	NA	NA	NA	NA	NA
prad_cdk12_mskcc_2020	P-0025990	P-0025990-T01-IM6	prad_cdk12_mskcc_2020:P-0025990-T01-IM6	prad_cdk12_mskcc_2020:P-0025990	0	NO	Prostate Cancer	Prostate Adenocarcinoma	0.0028	IMPACT468	MSKCC	Lymph Node	NA	0.79	Do not report	NA	PRAD	Prostate	Tumor	1	186	Metastasis	Male	Matched	0	10	NA	NA	NA	NA	NA	NA	NA	NA	NA	NA	NA	NA	NA	NA	NA	NA	NA	NA	NA	NA	NA	NA	NA
prad_cdk12_mskcc_2020	P-0026072	P-0026072-T01-IM6	prad_cdk12_mskcc_2020:P-0026072-T01-IM6	prad_cdk12_mskcc_2020:P-0026072	0	NO	Prostate Cancer	Prostate Adenocarcinoma	0.5028	IMPACT468	MSKCC	Lymph Node	MICROSATELLITE STABLE (MSS). See MSI note below.	2.18	Stable	3	PRAD	Prostate	Tumor	1	943	Metastasis	Male	Matched	2.59409	70	NA	NA	NA	NA	NA	NA	NA	NA	NA	NA	NA	NA	NA	NA	NA	NA	NA	NA	NA	NA	NA	NA	NA
prad_cdk12_mskcc_2020	P-0026097	P-0026097-T01-IM6	prad_cdk12_mskcc_2020:P-0026097-T01-IM6	prad_cdk12_mskcc_2020:P-0026097	0	NO	Prostate Cancer	Prostate Adenocarcinoma	0.0969	IMPACT468	MSKCC	Bone	MICROSATELLITE STABLE (MSS). See MSI note below.	0.09	Stable	4	PRAD	Prostate	Tumor	1	356	Metastasis	Male	Matched	3.45879	20	NA	NA	NA	NA	NA	NA	NA	NA	NA	NA	NA	NA	NA	NA	NA	NA	NA	NA	NA	NA	NA	NA	NA
prad_cdk12_mskcc_2020	P-0026153	P-0026153-T01-IM6	prad_cdk12_mskcc_2020:P-0026153-T01-IM6	prad_cdk12_mskcc_2020:P-0026153	0	NO	Prostate Cancer	Prostate Adenocarcinoma	0.2256	IMPACT468	MSKCC	Chest Wall	MICROSATELLITE STABLE (MSS). See MSI note below.	0.38	Stable	7	PRAD	Prostate	Tumor	1	873	Metastasis	Male	Matched	6.05289	70	NA	NA	NA	NA	NA	NA	NA	NA	NA	NA	NA	NA	NA	NA	NA	NA	NA	NA	NA	NA	NA	NA	NA
prad_cdk12_mskcc_2020	P-0026162	P-0026162-T01-IM6	prad_cdk12_mskcc_2020:P-0026162-T01-IM6	prad_cdk12_mskcc_2020:P-0026162	0	NO	Prostate Cancer	Prostate Adenocarcinoma	0.194	IMPACT468	MSKCC	Bone	MICROSATELLITE STABLE (MSS). See MSI note below.	0.34	Stable	6	PRAD	Prostate	Tumor	1	592	Metastasis	Male	Matched	5.18819	50	NA	NA	NA	NA	NA	NA	NA	NA	NA	NA	NA	NA	NA	NA	NA	NA	NA	NA	NA	NA	NA	NA	NA
prad_cdk12_mskcc_2020	P-0026202	P-0026202-T01-IM6	prad_cdk12_mskcc_2020:P-0026202-T01-IM6	prad_cdk12_mskcc_2020:P-0026202	0	NO	Prostate Cancer	Prostate Adenocarcinoma	0.3012	IMPACT468	MSKCC	Pelvis	MICROSATELLITE STABLE (MSS). See MSI note below.	0.32	Stable	2	PRAD	Prostate	Tumor	1	599	Metastasis	Male	Matched	1.7294	30	NA	NA	NA	NA	NA	NA	NA	NA	NA	NA	NA	NA	NA	NA	NA	NA	NA	NA	NA	NA	NA	NA	NA
prad_cdk12_mskcc_2020	P-0026228	P-0026228-T01-IM6	prad_cdk12_mskcc_2020:P-0026228-T01-IM6	prad_cdk12_mskcc_2020:P-0026228	0	NO	Prostate Cancer	Prostate Adenocarcinoma	0.2587	IMPACT468	MSKCC	Liver	MICROSATELLITE STABLE (MSS). See MSI note below.	0.35	Stable	3	PRAD	Prostate	Tumor	1	486	Metastasis	Male	Matched	2.59409	40	NA	NA	NA	NA	NA	NA	NA	NA	NA	NA	NA	NA	NA	NA	NA	NA	NA	NA	NA	NA	NA	NA	NA
prad_cdk12_mskcc_2020	P-0026316	P-0026316-T01-IM6	prad_cdk12_mskcc_2020:P-0026316-T01-IM6	prad_cdk12_mskcc_2020:P-0026316	0	NO	Prostate Cancer	Prostate Adenocarcinoma	0.1491	IMPACT468	MSKCC	Bone	MICROSATELLITE STABLE (MSS). See MSI note below.	0.14	Stable	5	PRAD	Prostate	Tumor	1	379	Metastasis	Male	Matched	4.32349	60	NA	NA	NA	NA	NA	NA	NA	NA	NA	NA	NA	NA	NA	NA	NA	NA	NA	NA	NA	NA	NA	NA	NA
prad_cdk12_mskcc_2020	P-0026355	P-0026355-T01-IM6	prad_cdk12_mskcc_2020:P-0026355-T01-IM6	prad_cdk12_mskcc_2020:P-0026355	0	NO	Prostate Cancer	Prostate Adenocarcinoma	0.1271	IMPACT468	MSKCC	Lung	MICROSATELLITE STABLE (MSS). See MSI note below.	0.23	Stable	2	PRAD	Prostate	Tumor	1	286	Metastasis	Male	Matched	1.7294	70	NA	NA	NA	NA	NA	NA	NA	NA	NA	NA	NA	NA	NA	NA	NA	NA	NA	NA	NA	NA	NA	NA	NA
prad_cdk12_mskcc_2020	P-0026409	P-0026409-T01-IM6	prad_cdk12_mskcc_2020:P-0026409-T01-IM6	prad_cdk12_mskcc_2020:P-0026409	0	NO	Prostate Cancer	Prostate Adenocarcinoma	0.1182	IMPACT468	MSKCC	Bone	MICROSATELLITE STABLE (MSS). See MSI note below.	0.25	Stable	5	PRAD	Prostate	Tumor	1	1007	Metastasis	Male	Matched	4.32349	70	NA	NA	NA	NA	NA	NA	NA	NA	NA	NA	NA	NA	NA	NA	NA	NA	NA	NA	NA	NA	NA	NA	NA
prad_cdk12_mskcc_2020	P-0026447	P-0026447-T01-IM6	prad_cdk12_mskcc_2020:P-0026447-T01-IM6	prad_cdk12_mskcc_2020:P-0026447	0	NO	Prostate Cancer	Prostate Adenocarcinoma	0.5202	IMPACT468	MSKCC	Bone	MICROSATELLITE STABLE (MSS). See MSI note below.	1.9	Stable	5	PRAD	Prostate	Tumor	1	762	Metastasis	Male	Matched	4.32349	80	NA	NA	NA	NA	NA	NA	NA	NA	NA	NA	NA	NA	NA	NA	NA	NA	NA	NA	NA	NA	NA	NA	NA
prad_cdk12_mskcc_2020	P-0026673	P-0026673-T01-IM6	prad_cdk12_mskcc_2020:P-0026673-T01-IM6	prad_cdk12_mskcc_2020:P-0026673	0	NO	Prostate Cancer	Prostate Adenocarcinoma	0.1742	IMPACT468	MSKCC	Bone	MICROSATELLITE STABLE (MSS). See MSI note below.	0.24	Stable	2	PRAD	Prostate	Tumor	1	484	Metastasis	Male	Matched	1.7294	50	NA	NA	NA	NA	NA	NA	NA	NA	NA	NA	NA	NA	NA	NA	NA	NA	NA	NA	NA	NA	NA	NA	NA
prad_cdk12_mskcc_2020	P-0026706	P-0026706-T01-IM6	prad_cdk12_mskcc_2020:P-0026706-T01-IM6	prad_cdk12_mskcc_2020:P-0026706	0	NO	Prostate Cancer	Prostate Adenocarcinoma	0.405	IMPACT468	MSKCC	Bone	MICROSATELLITE STABLE (MSS). See MSI note below.	0.68	Stable	3	PRAD	Prostate	Tumor	1	813	Metastasis	Male	Matched	2.59409	50	NA	NA	NA	NA	NA	NA	NA	NA	NA	NA	NA	NA	NA	NA	NA	NA	NA	NA	NA	NA	NA	NA	NA
prad_cdk12_mskcc_2020	P-0026768	P-0026768-T01-IM6	prad_cdk12_mskcc_2020:P-0026768-T01-IM6	prad_cdk12_mskcc_2020:P-0026768	0	NO	Prostate Cancer	Prostate Adenocarcinoma	0.4484	IMPACT468	MSKCC	Bladder Wall	MICROSATELLITE STABLE (MSS). See MSI note below.	0.85	Stable	5	PRAD	Prostate	Tumor	1	494	Metastasis	Male	Matched	4.32349	60	NA	NA	NA	NA	NA	NA	NA	NA	NA	NA	NA	NA	NA	NA	NA	NA	NA	NA	NA	NA	NA	NA	NA
prad_cdk12_mskcc_2020	P-0026774	P-0026774-T01-IM6	prad_cdk12_mskcc_2020:P-0026774-T01-IM6	prad_cdk12_mskcc_2020:P-0026774	0	NO	Prostate Cancer	Prostate Adenocarcinoma	0.1743	IMPACT468	MSKCC	Lung	MICROSATELLITE STABLE (MSS). See MSI note below.	0.15	Stable	3	PRAD	Prostate	Tumor	1	652	Metastasis	Male	Matched	2.59409	40	NA	NA	NA	NA	NA	NA	NA	NA	NA	NA	NA	NA	NA	NA	NA	NA	NA	NA	NA	NA	NA	NA	NA
prad_cdk12_mskcc_2020	P-0026808	P-0026808-T01-IM6	prad_cdk12_mskcc_2020:P-0026808-T01-IM6	prad_cdk12_mskcc_2020:P-0026808	0	NO	Prostate Cancer	Prostate Adenocarcinoma	0.6022	IMPACT468	MSKCC	Lung	MICROSATELLITE STABLE (MSS). See MSI note below.	1.2	Stable	5	PRAD	Prostate	Tumor	1	823	Metastasis	Male	Matched	4.32349	60	NA	NA	NA	NA	NA	NA	NA	NA	NA	NA	NA	NA	NA	NA	NA	NA	NA	NA	NA	NA	NA	NA	NA
prad_cdk12_mskcc_2020	P-0026812	P-0026812-T01-IM6	prad_cdk12_mskcc_2020:P-0026812-T01-IM6	prad_cdk12_mskcc_2020:P-0026812	0	NO	Prostate Cancer	Prostate Adenocarcinoma	0.0502	IMPACT468	MSKCC	Bone	MICROSATELLITE STABLE (MSS). See MSI note below.	0	Stable	1	PRAD	Prostate	Tumor	1	735	Metastasis	Male	Matched	0.864698	40	NA	NA	NA	NA	NA	NA	NA	NA	NA	NA	NA	NA	NA	NA	NA	NA	NA	NA	NA	NA	NA	NA	NA
prad_cdk12_mskcc_2020	P-0026855	P-0026855-T01-IM6	prad_cdk12_mskcc_2020:P-0026855-T01-IM6	prad_cdk12_mskcc_2020:P-0026855	0	NO	Prostate Cancer	Prostate Adenocarcinoma	0.3499	IMPACT468	MSKCC	Lymph Node	MICROSATELLITE STABLE (MSS). See MSI note below.	0.93	Stable	5	PRAD	Prostate	Tumor	1	1039	Metastasis	Male	Matched	4.32349	60	NA	NA	NA	NA	NA	NA	NA	NA	NA	NA	NA	NA	NA	NA	NA	NA	NA	NA	NA	NA	NA	NA	NA
prad_cdk12_mskcc_2020	P-0027082	P-0027082-T01-IM6	prad_cdk12_mskcc_2020:P-0027082-T01-IM6	prad_cdk12_mskcc_2020:P-0027082	0	NO	Prostate Cancer	Prostate Adenocarcinoma	0.1151	IMPACT468	MSKCC	Bone	MICROSATELLITE STABLE (MSS). See MSI note below.	0	Stable	3	PRAD	Prostate	Tumor	1	712	Metastasis	Male	Matched	2.59409	10	NA	NA	NA	NA	NA	NA	NA	NA	NA	NA	NA	NA	NA	NA	NA	NA	NA	NA	NA	NA	NA	NA	NA
prad_cdk12_mskcc_2020	P-0027193	P-0027193-T01-IM6	prad_cdk12_mskcc_2020:P-0027193-T01-IM6	prad_cdk12_mskcc_2020:P-0027193	0	YES	Prostate Cancer	Prostate Adenocarcinoma	0.0254	IMPACT468	MSKCC	Retroperitoneum	MICROSATELLITE STABLE (MSS). See MSI note below.	0	Stable	3	PRAD	Prostate	Tumor	1	822	Metastasis	Male	Matched	2.59409	20	NA	NA	NA	NA	NA	NA	NA	NA	NA	NA	NA	NA	NA	NA	NA	NA	NA	NA	NA	NA	NA	NA	NA
prad_cdk12_mskcc_2020	P-0027210	P-0027210-T01-IM6	prad_cdk12_mskcc_2020:P-0027210-T01-IM6	prad_cdk12_mskcc_2020:P-0027210	0	NO	Prostate Cancer	Prostate Adenocarcinoma	0.0386	IMPACT468	MSKCC	Bone	MICROSATELLITE STABLE (MSS). See MSI note below.	0.15	Stable	5	PRAD	Prostate	Tumor	1	652	Metastasis	Male	Matched	4.32349	10	NA	NA	NA	NA	NA	NA	NA	NA	NA	NA	NA	NA	NA	NA	NA	NA	NA	NA	NA	NA	NA	NA	NA
prad_cdk12_mskcc_2020	P-0027466	P-0027466-T01-IM6	prad_cdk12_mskcc_2020:P-0027466-T01-IM6	prad_cdk12_mskcc_2020:P-0027466	0	NO	Prostate Cancer	Prostate Adenocarcinoma	0.2552	IMPACT468	MSKCC	Colon	MICROSATELLITE STABLE (MSS). See MSI note below.	0.07	Stable	5	PRAD	Prostate	Tumor	1	721	Metastasis	Male	Matched	4.32349	40	NA	NA	NA	NA	NA	NA	NA	NA	NA	NA	NA	NA	NA	NA	NA	NA	NA	NA	NA	NA	NA	NA	NA
prad_cdk12_mskcc_2020	P-0027471	P-0027471-T01-IM6	prad_cdk12_mskcc_2020:P-0027471-T01-IM6	prad_cdk12_mskcc_2020:P-0027471	0	NO	Prostate Cancer	Prostate Adenocarcinoma	0.0022	IMPACT468	MSKCC	Bone	MICROSATELLITE STABLE (MSS). See MSI note below.	0	Stable	NA	PRAD	Prostate	Tumor	1	703	Metastasis	Male	Matched	0	10	NA	NA	NA	NA	NA	NA	NA	NA	NA	NA	NA	NA	NA	NA	NA	NA	NA	NA	NA	NA	NA	NA	NA
prad_cdk12_mskcc_2020	P-0027711	P-0027711-T01-IM6	prad_cdk12_mskcc_2020:P-0027711-T01-IM6	prad_cdk12_mskcc_2020:P-0027711	0	NO	Prostate Cancer	Prostate Adenocarcinoma	0.0869	IMPACT468	MSKCC	Lymph Node	MICROSATELLITE STABLE (MSS). See MSI note below.	0.72	Stable	3	PRAD	Prostate	Tumor	1	654	Metastasis	Male	Matched	2.59409	80	NA	NA	NA	NA	NA	NA	NA	NA	NA	NA	NA	NA	NA	NA	NA	NA	NA	NA	NA	NA	NA	NA	NA
prad_cdk12_mskcc_2020	P-0027722	P-0027722-T01-IM6	prad_cdk12_mskcc_2020:P-0027722-T01-IM6	prad_cdk12_mskcc_2020:P-0027722	0	NO	Prostate Cancer	Prostate Adenocarcinoma	0.2459	IMPACT468	MSKCC	Liver	MICROSATELLITE STABLE (MSS). See MSI note below.	0.75	Stable	9	PRAD	Prostate	Tumor	1	492	Metastasis	Male	Matched	7.78228	40	NA	NA	NA	NA	NA	NA	NA	NA	NA	NA	NA	NA	NA	NA	NA	NA	NA	NA	NA	NA	NA	NA	NA
prad_cdk12_mskcc_2020	P-0027823	P-0027823-T01-IM6	prad_cdk12_mskcc_2020:P-0027823-T01-IM6	prad_cdk12_mskcc_2020:P-0027823	0	NO	Prostate Cancer	Prostate Adenocarcinoma	0.0289	IMPACT468	MSKCC	Retroperitoneum	MICROSATELLITE STABLE (MSS). See MSI note below.	0.07	Stable	3	PRAD	Prostate	Tumor	1	959	Metastasis	Male	Matched	2.59409	30	NA	NA	NA	NA	NA	NA	NA	NA	NA	NA	NA	NA	NA	NA	NA	NA	NA	NA	NA	NA	NA	NA	NA
prad_cdk12_mskcc_2020	P-0027874	P-0027874-T01-IM6	prad_cdk12_mskcc_2020:P-0027874-T01-IM6	prad_cdk12_mskcc_2020:P-0027874	0	NO	Prostate Cancer	Prostate Adenocarcinoma	0.2669	IMPACT468	MSKCC	Retroperitoneum	MICROSATELLITE STABLE (MSS). See MSI note below.	0.59	Stable	3	PRAD	Prostate	Tumor	1	860	Metastasis	Male	Matched	2.59409	50	NA	NA	NA	NA	NA	NA	NA	NA	NA	NA	NA	NA	NA	NA	NA	NA	NA	NA	NA	NA	NA	NA	NA
prad_cdk12_mskcc_2020	P-0027923	P-0027923-T01-IM6	prad_cdk12_mskcc_2020:P-0027923-T01-IM6	prad_cdk12_mskcc_2020:P-0027923	0	NO	Prostate Cancer	Prostate Adenocarcinoma	0.0103	IMPACT468	MSKCC	Bone	MICROSATELLITE STABLE (MSS). See MSI note below.	0	Stable	NA	PRAD	Prostate	Tumor	1	861	Metastasis	Male	Matched	0	10	NA	NA	NA	NA	NA	NA	NA	NA	NA	NA	NA	NA	NA	NA	NA	NA	NA	NA	NA	NA	NA	NA	NA
prad_cdk12_mskcc_2020	P-0028053	P-0028053-T01-IM6	prad_cdk12_mskcc_2020:P-0028053-T01-IM6	prad_cdk12_mskcc_2020:P-0028053	0	NO	Prostate Cancer	Prostate Adenocarcinoma	0.003	IMPACT468	MSKCC	Bone	MICROSATELLITE STABLE (MSS). See MSI note below.	0.07	Stable	1	PRAD	Prostate	Tumor	1	436	Metastasis	Male	Matched	0.864698	10	NA	NA	NA	NA	NA	NA	NA	NA	NA	NA	NA	NA	NA	NA	NA	NA	NA	NA	NA	NA	NA	NA	NA
prad_cdk12_mskcc_2020	P-0028071	P-0028071-T01-IM6	prad_cdk12_mskcc_2020:P-0028071-T01-IM6	prad_cdk12_mskcc_2020:P-0028071	0	NO	Prostate Cancer	Prostate Adenocarcinoma	0.3645	IMPACT468	MSKCC	Lymph node	MICROSATELLITE STABLE (MSS). See MSI note below.	0.5	Stable	8	PRAD	Prostate	Tumor	1	669	Metastasis	Male	Matched	6.91758	60	NA	NA	NA	NA	NA	NA	NA	NA	NA	NA	NA	NA	NA	NA	NA	NA	NA	NA	NA	NA	NA	NA	NA
prad_cdk12_mskcc_2020	P-0028090	P-0028090-T01-IM6	prad_cdk12_mskcc_2020:P-0028090-T01-IM6	prad_cdk12_mskcc_2020:P-0028090	0	NO	Prostate Cancer	Prostate Adenocarcinoma	0.3389	IMPACT468	MSKCC	Lung	MICROSATELLITE STABLE (MSS). See MSI note below.	1.01	Stable	1	PRAD	Prostate	Tumor	1	809	Metastasis	Male	Matched	0.864698	60	NA	NA	NA	NA	NA	NA	NA	NA	NA	NA	NA	NA	NA	NA	NA	NA	NA	NA	NA	NA	NA	NA	NA
prad_cdk12_mskcc_2020	P-0028167	P-0028167-T01-IM6	prad_cdk12_mskcc_2020:P-0028167-T01-IM6	prad_cdk12_mskcc_2020:P-0028167	0	NO	Prostate Cancer	Prostate Adenocarcinoma	0.1986	IMPACT468	MSKCC	Liver	MICROSATELLITE STABLE (MSS). See MSI note below.	0.06	Stable	4	PRAD	Prostate	Tumor	1	533	Metastasis	Male	Matched	3.45879	40	NA	NA	NA	NA	NA	NA	NA	NA	NA	NA	NA	NA	NA	NA	NA	NA	NA	NA	NA	NA	NA	NA	NA
prad_cdk12_mskcc_2020	P-0028700	P-0028700-T01-IM6	prad_cdk12_mskcc_2020:P-0028700-T01-IM6	prad_cdk12_mskcc_2020:P-0028700	0	NO	Prostate Cancer	Prostate Adenocarcinoma	0.0429	IMPACT468	MSKCC	Bone	MICROSATELLITE STABLE (MSS). See MSI note below.	0	Stable	2	PRAD	Prostate	Tumor	1	660	Metastasis	Male	Matched	1.7294	20	NA	NA	NA	NA	NA	NA	NA	NA	NA	NA	NA	NA	NA	NA	NA	NA	NA	NA	NA	NA	NA	NA	NA
prad_cdk12_mskcc_2020	P-0028741	P-0028741-T01-IM6	prad_cdk12_mskcc_2020:P-0028741-T01-IM6	prad_cdk12_mskcc_2020:P-0028741	0	NO	Prostate Cancer	Prostate Adenocarcinoma	0.3001	IMPACT468	MSKCC	NA	MICROSATELLITE STABLE (MSS). See MSI note below.	0.29	Stable	5	PRAD	Prostate	Tumor	1	540	Metastasis	Male	Matched	4.32349	20	NA	NA	NA	NA	NA	NA	NA	NA	NA	NA	NA	NA	NA	NA	NA	NA	NA	NA	NA	NA	NA	NA	NA
prad_cdk12_mskcc_2020	P-0028784	P-0028784-T01-IM6	prad_cdk12_mskcc_2020:P-0028784-T01-IM6	prad_cdk12_mskcc_2020:P-0028784	0	NO	Prostate Cancer	Prostate Adenocarcinoma	0.3612	IMPACT468	MSKCC	Lymph Node	MICROSATELLITE STABLE (MSS). See MSI note below.	0.87	Stable	2	PRAD	Prostate	Tumor	1	857	Metastasis	Male	Matched	1.7294	80	NA	NA	NA	NA	NA	NA	NA	NA	NA	NA	NA	NA	NA	NA	NA	NA	NA	NA	NA	NA	NA	NA	NA
prad_cdk12_mskcc_2020	P-0029059	P-0029059-T01-IM6	prad_cdk12_mskcc_2020:P-0029059-T01-IM6	prad_cdk12_mskcc_2020:P-0029059	0	YES	Prostate Cancer	Prostate Adenocarcinoma	0.1455	IMPACT468	MSKCC	Rib	MICROSATELLITE STABLE (MSS). See MSI note below.	0.06	Stable	2	PRAD	Prostate	Tumor	1	610	Metastasis	Male	Matched	1.7294	40	NA	NA	NA	NA	NA	NA	NA	NA	NA	NA	NA	NA	NA	NA	NA	NA	NA	NA	NA	NA	NA	NA	NA
prad_cdk12_mskcc_2020	P-0029105	P-0029105-T01-IM6	prad_cdk12_mskcc_2020:P-0029105-T01-IM6	prad_cdk12_mskcc_2020:P-0029105	0	NO	Prostate Cancer	Prostate Adenocarcinoma	0.53	IMPACT468	MSKCC	Lymph Node	MICROSATELLITE STABLE (MSS). See MSI note below.	0.32	Stable	2	PRAD	Prostate	Tumor	1	713	Metastasis	Male	Matched	1.7294	60	NA	NA	NA	NA	NA	NA	NA	NA	NA	NA	NA	NA	NA	NA	NA	NA	NA	NA	NA	NA	NA	NA	NA
prad_cdk12_mskcc_2020	P-0029106	P-0029106-T01-IM6	prad_cdk12_mskcc_2020:P-0029106-T01-IM6	prad_cdk12_mskcc_2020:P-0029106	0	NO	Prostate Cancer	Prostate Adenocarcinoma	0.0672	IMPACT468	MSKCC	lymph node	MICROSATELLITE STABLE (MSS). See MSI note below.	0.11	Stable	3	PRAD	Prostate	Tumor	1	886	Metastasis	Male	Matched	2.59409	40	NA	NA	NA	NA	NA	NA	NA	NA	NA	NA	NA	NA	NA	NA	NA	NA	NA	NA	NA	NA	NA	NA	NA
prad_cdk12_mskcc_2020	P-0029336	P-0029336-T01-IM6	prad_cdk12_mskcc_2020:P-0029336-T01-IM6	prad_cdk12_mskcc_2020:P-0029336	0	NO	Prostate Cancer	Prostate Adenocarcinoma	0.1069	IMPACT468	MSKCC	Soft Tissue	MICROSATELLITE STABLE (MSS). See MSI note below.	0.06	Stable	6	PRAD	Prostate	Tumor	1	619	Metastasis	Male	Matched	5.18819	50	NA	NA	NA	NA	NA	NA	NA	NA	NA	NA	NA	NA	NA	NA	NA	NA	NA	NA	NA	NA	NA	NA	NA
prad_cdk12_mskcc_2020	P-0029339	P-0029339-T01-IM6	prad_cdk12_mskcc_2020:P-0029339-T01-IM6	prad_cdk12_mskcc_2020:P-0029339	0	NO	Prostate Cancer	Prostate Adenocarcinoma	0.2856	IMPACT468	MSKCC	Bone	MICROSATELLITE STABLE (MSS). See MSI note below.	0.62	Stable	3	PRAD	Prostate	Tumor	1	699	Metastasis	Male	Matched	2.59409	90	NA	NA	NA	NA	NA	NA	NA	NA	NA	NA	NA	NA	NA	NA	NA	NA	NA	NA	NA	NA	NA	NA	NA
prad_cdk12_mskcc_2020	P-0029523	P-0029523-T01-IM6	prad_cdk12_mskcc_2020:P-0029523-T01-IM6	prad_cdk12_mskcc_2020:P-0029523	0	NO	Prostate Cancer	Prostate Adenocarcinoma	0.229	IMPACT468	MSKCC	Lymph Node	MICROSATELLITE STABLE (MSS). See MSI note below.	0.45	Stable	2	PRAD	Prostate	Tumor	1	477	Metastasis	Male	Matched	1.7294	40	NA	NA	NA	NA	NA	NA	NA	NA	NA	NA	NA	NA	NA	NA	NA	NA	NA	NA	NA	NA	NA	NA	NA
prad_cdk12_mskcc_2020	P-0029604	P-0029604-T01-IM6	prad_cdk12_mskcc_2020:P-0029604-T01-IM6	prad_cdk12_mskcc_2020:P-0029604	0	NO	Prostate Cancer	Prostate Adenocarcinoma	0.0019	IMPACT468	MSKCC	Bone	MICROSATELLITE STABLE (MSS). See MSI note below.	0.07	Stable	3	PRAD	Prostate	Tumor	1	822	Metastasis	Male	Matched	2.59409	10	NA	NA	NA	NA	NA	NA	NA	NA	NA	NA	NA	NA	NA	NA	NA	NA	NA	NA	NA	NA	NA	NA	NA
prad_cdk12_mskcc_2020	P-0029659	P-0029659-T01-IM6	prad_cdk12_mskcc_2020:P-0029659-T01-IM6	prad_cdk12_mskcc_2020:P-0029659	0	NO	Prostate Cancer	Prostate Adenocarcinoma	0.0026	IMPACT468	MSKCC	Bone	MICROSATELLITE STABLE (MSS). See MSI note below.	0.18	Stable	1	PRAD	Prostate	Tumor	1	1526	Metastasis	Male	Matched	0.864698	10	NA	NA	NA	NA	NA	NA	NA	NA	NA	NA	NA	NA	NA	NA	NA	NA	NA	NA	NA	NA	NA	NA	NA
prad_cdk12_mskcc_2020	P-0029728	P-0029728-T01-IM6	prad_cdk12_mskcc_2020:P-0029728-T01-IM6	prad_cdk12_mskcc_2020:P-0029728	0	NO	Prostate Cancer	Prostate Adenocarcinoma	0.0857	IMPACT468	MSKCC	Bone	MICROSATELLITE STABLE (MSS). See MSI note below.	0	Stable	5	PRAD	Prostate	Tumor	1	710	Metastasis	Male	Matched	4.32349	30	NA	NA	NA	NA	NA	NA	NA	NA	NA	NA	NA	NA	NA	NA	NA	NA	NA	NA	NA	NA	NA	NA	NA
prad_cdk12_mskcc_2020	P-0029843	P-0029843-T01-IM6	prad_cdk12_mskcc_2020:P-0029843-T01-IM6	prad_cdk12_mskcc_2020:P-0029843	0	YES	Prostate Cancer	Prostate Adenocarcinoma	0.3169	IMPACT468	MSKCC	Lymph Node	MICROSATELLITE STABLE (MSS). See MSI note below.	0.52	Stable	6	PRAD	Prostate	Tumor	1	343	Metastasis	Male	Matched	5.18819	30	NA	NA	NA	NA	NA	NA	NA	NA	NA	NA	NA	NA	NA	NA	NA	NA	NA	NA	NA	NA	NA	NA	NA
prad_cdk12_mskcc_2020	P-0029852	P-0029852-T01-IM6	prad_cdk12_mskcc_2020:P-0029852-T01-IM6	prad_cdk12_mskcc_2020:P-0029852	0	NO	Prostate Cancer	Prostate Adenocarcinoma	0.285	IMPACT468	MSKCC	Bone	MICROSATELLITE STABLE (MSS). See MSI note below.	0.07	Stable	3	PRAD	Prostate	Tumor	1	604	Metastasis	Male	Matched	2.59409	50	NA	NA	NA	NA	NA	NA	NA	NA	NA	NA	NA	NA	NA	NA	NA	NA	NA	NA	NA	NA	NA	NA	NA
prad_cdk12_mskcc_2020	P-0030029	P-0030029-T01-IM6	prad_cdk12_mskcc_2020:P-0030029-T01-IM6	prad_cdk12_mskcc_2020:P-0030029	0	NO	Prostate Cancer	Prostate Adenocarcinoma	0.0825	IMPACT468	MSKCC	Lymph node	MICROSATELLITE STABLE (MSS). See MSI note below.	0.12	Stable	2	PRAD	Prostate	Tumor	1	528	Metastasis	Male	Matched	1.7294	80	NA	NA	NA	NA	NA	NA	NA	NA	NA	NA	NA	NA	NA	NA	NA	NA	NA	NA	NA	NA	NA	NA	NA
prad_cdk12_mskcc_2020	P-0030180	P-0030180-T01-IM6	prad_cdk12_mskcc_2020:P-0030180-T01-IM6	prad_cdk12_mskcc_2020:P-0030180	0	NO	Prostate Cancer	Prostate Adenocarcinoma	0.1956	IMPACT468	MSKCC	Lymph Node	MICROSATELLITE STABLE (MSS). See MSI note below.	0.3	Stable	3	PRAD	Prostate	Tumor	1	516	Metastasis	Male	Matched	2.59409	60	NA	NA	NA	NA	NA	NA	NA	NA	NA	NA	NA	NA	NA	NA	NA	NA	NA	NA	NA	NA	NA	NA	NA
prad_cdk12_mskcc_2020	P-0030381	P-0030381-T01-IM6	prad_cdk12_mskcc_2020:P-0030381-T01-IM6	prad_cdk12_mskcc_2020:P-0030381	0	NO	Prostate Cancer	Prostate Adenocarcinoma	0.1047	IMPACT468	MSKCC	Lung	MICROSATELLITE STABLE (MSS). See MSI note below.	0.38	Stable	3	PRAD	Prostate	Tumor	1	594	Metastasis	Male	Matched	2.59409	80	NA	NA	NA	NA	NA	NA	NA	NA	NA	NA	NA	NA	NA	NA	NA	NA	NA	NA	NA	NA	NA	NA	NA
prad_cdk12_mskcc_2020	P-0030438	P-0030438-T01-IM6	prad_cdk12_mskcc_2020:P-0030438-T01-IM6	prad_cdk12_mskcc_2020:P-0030438	0	NO	Prostate Cancer	Prostate Adenocarcinoma	0.2607	IMPACT468	MSKCC	Lymph Node	MICROSATELLITE STABLE (MSS). See MSI note below.	0	Stable	5	PRAD	Prostate	Tumor	1	412	Metastasis	Male	Matched	4.32349	50	NA	NA	NA	NA	NA	NA	NA	NA	NA	NA	NA	NA	NA	NA	NA	NA	NA	NA	NA	NA	NA	NA	NA
prad_cdk12_mskcc_2020	P-0030445	P-0030445-T01-IM6	prad_cdk12_mskcc_2020:P-0030445-T01-IM6	prad_cdk12_mskcc_2020:P-0030445	0	NO	Prostate Cancer	Prostate Adenocarcinoma	0	IMPACT468	MSKCC	Bone	MICROSATELLITE STABLE (MSS). See MSI note below.	0	Stable	2	PRAD	Prostate	Tumor	1	632	Metastasis	Male	Matched	1.7294	20	NA	NA	NA	NA	NA	NA	NA	NA	NA	NA	NA	NA	NA	NA	NA	NA	NA	NA	NA	NA	NA	NA	NA
prad_cdk12_mskcc_2020	P-0030521	P-0030521-T02-IM6	prad_cdk12_mskcc_2020:P-0030521-T02-IM6	prad_cdk12_mskcc_2020:P-0030521	0	NO	Prostate Cancer	Prostate Adenocarcinoma	0.2466	IMPACT468	MSKCC	Liver	MICROSATELLITE STABLE (MSS). See MSI note below.	0.54	Stable	7	PRAD	Prostate	Tumor	1	808	Metastasis	Male	Matched	6.05289	80	NA	NA	NA	NA	NA	NA	NA	NA	NA	NA	NA	NA	NA	NA	NA	NA	NA	NA	NA	NA	NA	NA	NA
prad_cdk12_mskcc_2020	P-0030580	P-0030580-T01-IM6	prad_cdk12_mskcc_2020:P-0030580-T01-IM6	prad_cdk12_mskcc_2020:P-0030580	0	NO	Prostate Cancer	Prostate Adenocarcinoma	0.4318	IMPACT468	MSKCC	Lymph Node	MICROSATELLITE STABLE (MSS). See MSI note below.	0.6	Stable	2	PRAD	Prostate	Tumor	1	591	Metastasis	Male	Matched	1.7294	30	NA	NA	NA	NA	NA	NA	NA	NA	NA	NA	NA	NA	NA	NA	NA	NA	NA	NA	NA	NA	NA	NA	NA
prad_cdk12_mskcc_2020	P-0030625	P-0030625-T01-IM6	prad_cdk12_mskcc_2020:P-0030625-T01-IM6	prad_cdk12_mskcc_2020:P-0030625	0	NO	Prostate Cancer	Prostate Adenocarcinoma	0.2553	IMPACT468	MSKCC	Lymph Node	MICROSATELLITE STABLE (MSS). See MSI note below.	0.12	Stable	5	PRAD	Prostate	Tumor	1	465	Metastasis	Male	Matched	4.32349	70	NA	NA	NA	NA	NA	NA	NA	NA	NA	NA	NA	NA	NA	NA	NA	NA	NA	NA	NA	NA	NA	NA	NA
prad_cdk12_mskcc_2020	P-0030801	P-0030801-T01-IM6	prad_cdk12_mskcc_2020:P-0030801-T01-IM6	prad_cdk12_mskcc_2020:P-0030801	0	NO	Prostate Cancer	Prostate Adenocarcinoma	0.0456	IMPACT468	MSKCC	Lymph Node	MICROSATELLITE STABLE (MSS). See MSI note below.	0.13	Stable	3	PRAD	Prostate	Tumor	1	811	Metastasis	Male	Matched	2.59409	30	NA	NA	NA	NA	NA	NA	NA	NA	NA	NA	NA	NA	NA	NA	NA	NA	NA	NA	NA	NA	NA	NA	NA
prad_cdk12_mskcc_2020	P-0030976	P-0030976-T01-IM6	prad_cdk12_mskcc_2020:P-0030976-T01-IM6	prad_cdk12_mskcc_2020:P-0030976	0	NO	Prostate Cancer	Prostate Adenocarcinoma	0.0967	IMPACT468	MSKCC	Lymph Node	MICROSATELLITE STABLE (MSS). See MSI note below.	0.48	Stable	5	PRAD	Prostate	Tumor	1	364	Metastasis	Male	Matched	4.32349	40	NA	NA	NA	NA	NA	NA	NA	NA	NA	NA	NA	NA	NA	NA	NA	NA	NA	NA	NA	NA	NA	NA	NA
prad_cdk12_mskcc_2020	P-0031008	P-0031008-T01-IM6	prad_cdk12_mskcc_2020:P-0031008-T01-IM6	prad_cdk12_mskcc_2020:P-0031008	0	NO	Prostate Cancer	Prostate Adenocarcinoma	0.1303	IMPACT468	MSKCC	Retroperitoneum	MICROSATELLITE STABLE (MSS). See MSI note below.	1.09	Stable	1	PRAD	Prostate	Tumor	1	413	Metastasis	Male	Matched	0.864698	30	NA	NA	NA	NA	NA	NA	NA	NA	NA	NA	NA	NA	NA	NA	NA	NA	NA	NA	NA	NA	NA	NA	NA
prad_cdk12_mskcc_2020	P-0031062	P-0031062-T01-IM6	prad_cdk12_mskcc_2020:P-0031062-T01-IM6	prad_cdk12_mskcc_2020:P-0031062	0	NO	Prostate Cancer	Prostate Adenocarcinoma	0.0929	IMPACT468	MSKCC	Lung	MICROSATELLITE STABLE (MSS). See MSI note below.	0	Stable	5	PRAD	Prostate	Tumor	1	804	Metastasis	Male	Matched	4.32349	30	NA	NA	NA	NA	NA	NA	NA	NA	NA	NA	NA	NA	NA	NA	NA	NA	NA	NA	NA	NA	NA	NA	NA
prad_cdk12_mskcc_2020	P-0031392	P-0031392-T01-IM6	prad_cdk12_mskcc_2020:P-0031392-T01-IM6	prad_cdk12_mskcc_2020:P-0031392	0	NO	Prostate Cancer	Prostate Adenocarcinoma	0.3327	IMPACT468	MSKCC	Retroperitoneum	MICROSATELLITE STABLE (MSS). See MSI note below.	0	Stable	1	PRAD	Prostate	Tumor	1	723	Metastasis	Male	Matched	0.864698	50	NA	NA	NA	NA	NA	NA	NA	NA	NA	NA	NA	NA	NA	NA	NA	NA	NA	NA	NA	NA	NA	NA	NA
prad_cdk12_mskcc_2020	P-0031419	P-0031419-T01-IM6	prad_cdk12_mskcc_2020:P-0031419-T01-IM6	prad_cdk12_mskcc_2020:P-0031419	0	NO	Prostate Cancer	Prostate Adenocarcinoma	0.2215	IMPACT468	MSKCC	Lymph Node	MICROSATELLITE STABLE (MSS). See MSI note below.	1.29	Stable	4	PRAD	Prostate	Tumor	1	756	Metastasis	Male	Matched	3.45879	40	NA	NA	NA	NA	NA	NA	NA	NA	NA	NA	NA	NA	NA	NA	NA	NA	NA	NA	NA	NA	NA	NA	NA
prad_cdk12_mskcc_2020	P-0031426	P-0031426-T01-IM6	prad_cdk12_mskcc_2020:P-0031426-T01-IM6	prad_cdk12_mskcc_2020:P-0031426	0	NO	Prostate Cancer	Prostate Adenocarcinoma	0.2036	IMPACT468	MSKCC	Lung	MICROSATELLITE STABLE (MSS). See MSI note below.	0.5	Stable	4	PRAD	Prostate	Tumor	1	680	Metastasis	Male	Matched	3.45879	50	NA	NA	NA	NA	NA	NA	NA	NA	NA	NA	NA	NA	NA	NA	NA	NA	NA	NA	NA	NA	NA	NA	NA
prad_cdk12_mskcc_2020	P-0031429	P-0031429-T01-IM6	prad_cdk12_mskcc_2020:P-0031429-T01-IM6	prad_cdk12_mskcc_2020:P-0031429	0	NO	Prostate Cancer	Prostate Adenocarcinoma	0.0864	IMPACT468	MSKCC	Lymph Node	MICROSATELLITE STABLE (MSS). See MSI note below.	0.37	Stable	15	PRAD	Prostate	Tumor	1	255	Metastasis	Male	Matched	12.9705	10	NA	NA	NA	NA	NA	NA	NA	NA	NA	NA	NA	NA	NA	NA	NA	NA	NA	NA	NA	NA	NA	NA	NA
prad_cdk12_mskcc_2020	P-0031536	P-0031536-T01-IM6	prad_cdk12_mskcc_2020:P-0031536-T01-IM6	prad_cdk12_mskcc_2020:P-0031536	0	NO	Prostate Cancer	Prostate Adenocarcinoma	0.0418	IMPACT468	MSKCC	Brain	MICROSATELLITE STABLE (MSS). See MSI note below.	0.11	Stable	2	PRAD	Prostate	Tumor	1	455	Metastasis	Male	Matched	1.7294	10	NA	NA	NA	NA	NA	NA	NA	NA	NA	NA	NA	NA	NA	NA	NA	NA	NA	NA	NA	NA	NA	NA	NA
prad_cdk12_mskcc_2020	P-0031712	P-0031712-T01-IM6	prad_cdk12_mskcc_2020:P-0031712-T01-IM6	prad_cdk12_mskcc_2020:P-0031712	0	NO	Prostate Cancer	Prostate Adenocarcinoma	0.3447	IMPACT468	MSKCC	Bone	MICROSATELLITE STABLE (MSS). See MSI note below.	0.72	Stable	4	PRAD	Prostate	Tumor	1	643	Metastasis	Male	Matched	3.45879	40	NA	NA	NA	NA	NA	NA	NA	NA	NA	NA	NA	NA	NA	NA	NA	NA	NA	NA	NA	NA	NA	NA	NA
prad_cdk12_mskcc_2020	P-0031720	P-0031720-T01-IM6	prad_cdk12_mskcc_2020:P-0031720-T01-IM6	prad_cdk12_mskcc_2020:P-0031720	0	NO	Prostate Cancer	Prostate Adenocarcinoma	0.171	IMPACT468	MSKCC	Bone	MICROSATELLITE STABLE (MSS). See MSI note below.	0.05	Stable	4	PRAD	Prostate	Tumor	1	607	Metastasis	Male	Matched	3.45879	20	NA	NA	NA	NA	NA	NA	NA	NA	NA	NA	NA	NA	NA	NA	NA	NA	NA	NA	NA	NA	NA	NA	NA
prad_cdk12_mskcc_2020	P-0031808	P-0031808-T02-IM6	prad_cdk12_mskcc_2020:P-0031808-T02-IM6	prad_cdk12_mskcc_2020:P-0031808	0	NO	Prostate Cancer	Prostate Adenocarcinoma	0.5985	IMPACT468	MSKCC	Liver	MICROSATELLITE STABLE (MSS). See MSI note below.	2.09	Stable	3	PRAD	Prostate	Tumor	1	872	Metastasis	Male	Matched	2.59409	50	NA	NA	NA	NA	NA	NA	NA	NA	NA	NA	NA	NA	NA	NA	NA	NA	NA	NA	NA	NA	NA	NA	NA
prad_cdk12_mskcc_2020	P-0031991	P-0031991-T01-IM6	prad_cdk12_mskcc_2020:P-0031991-T01-IM6	prad_cdk12_mskcc_2020:P-0031991	0	NO	Prostate Cancer	Prostate Adenocarcinoma	0.2585	IMPACT468	MSKCC	Lymph Node	MICROSATELLITE STABLE (MSS). See MSI note below.	0.56	Stable	1	PRAD	Prostate	Tumor	1	699	Metastasis	Male	Matched	0.864698	40	NA	NA	NA	NA	NA	NA	NA	NA	NA	NA	NA	NA	NA	NA	NA	NA	NA	NA	NA	NA	NA	NA	NA
prad_cdk12_mskcc_2020	P-0032080	P-0032080-T01-IM6	prad_cdk12_mskcc_2020:P-0032080-T01-IM6	prad_cdk12_mskcc_2020:P-0032080	0	NO	Prostate Cancer	Prostate Adenocarcinoma	0.047	IMPACT468	MSKCC	Bone	MICROSATELLITE STABLE (MSS). See MSI note below.	0	Stable	1	PRAD	Prostate	Tumor	1	375	Metastasis	Male	Matched	0.864698	30	NA	NA	NA	NA	NA	NA	NA	NA	NA	NA	NA	NA	NA	NA	NA	NA	NA	NA	NA	NA	NA	NA	NA
prad_cdk12_mskcc_2020	P-0032194	P-0032194-T01-IM6	prad_cdk12_mskcc_2020:P-0032194-T01-IM6	prad_cdk12_mskcc_2020:P-0032194	0	NO	Prostate Cancer	Prostate Adenocarcinoma	0.3041	IMPACT468	MSKCC	Lymph Node	MICROSATELLITE STABLE (MSS). See MSI note below.	0.24	Stable	6	PRAD	Prostate	Tumor	1	595	Metastasis	Male	Matched	5.18819	50	NA	NA	NA	NA	NA	NA	NA	NA	NA	NA	NA	NA	NA	NA	NA	NA	NA	NA	NA	NA	NA	NA	NA
prad_cdk12_mskcc_2020	P-0032212	P-0032212-T01-IM6	prad_cdk12_mskcc_2020:P-0032212-T01-IM6	prad_cdk12_mskcc_2020:P-0032212	0	NO	Prostate Cancer	Prostate Adenocarcinoma	0.1609	IMPACT468	MSKCC	Liver	MICROSATELLITE STABLE (MSS). See MSI note below.	0	Stable	3	PRAD	Prostate	Tumor	1	618	Metastasis	Male	Matched	2.59409	30	NA	NA	NA	NA	NA	NA	NA	NA	NA	NA	NA	NA	NA	NA	NA	NA	NA	NA	NA	NA	NA	NA	NA
prad_cdk12_mskcc_2020	P-0032256	P-0032256-T01-IM6	prad_cdk12_mskcc_2020:P-0032256-T01-IM6	prad_cdk12_mskcc_2020:P-0032256	0	NO	Prostate Cancer	Prostate Adenocarcinoma	0.3196	IMPACT468	MSKCC	Iliac Bone	MICROSATELLITE STABLE (MSS). See MSI note below.	0.78	Stable	5	PRAD	Prostate	Tumor	1	276	Metastasis	Male	Matched	4.32349	40	NA	NA	NA	NA	NA	NA	NA	NA	NA	NA	NA	NA	NA	NA	NA	NA	NA	NA	NA	NA	NA	NA	NA
prad_cdk12_mskcc_2020	P-0032314	P-0032314-T01-IM6	prad_cdk12_mskcc_2020:P-0032314-T01-IM6	prad_cdk12_mskcc_2020:P-0032314	0	NO	Prostate Cancer	Prostate Adenocarcinoma	0.075	IMPACT468	MSKCC	Soft Tissue	MICROSATELLITE STABLE (MSS). See MSI note below.	0	Stable	4	PRAD	Prostate	Tumor	1	630	Metastasis	Male	Matched	3.45879	20	NA	NA	NA	NA	NA	NA	NA	NA	NA	NA	NA	NA	NA	NA	NA	NA	NA	NA	NA	NA	NA	NA	NA
prad_cdk12_mskcc_2020	P-0032478	P-0032478-T01-IM6	prad_cdk12_mskcc_2020:P-0032478-T01-IM6	prad_cdk12_mskcc_2020:P-0032478	0	NO	Prostate Cancer	Prostate Adenocarcinoma	0.2423	IMPACT468	MSKCC	Pelvis	MICROSATELLITE STABLE (MSS). See MSI note below.	0.26	Stable	4	PRAD	Prostate	Tumor	1	341	Metastasis	Male	Matched	3.45879	30	NA	NA	NA	NA	NA	NA	NA	NA	NA	NA	NA	NA	NA	NA	NA	NA	NA	NA	NA	NA	NA	NA	NA
prad_cdk12_mskcc_2020	P-0032651	P-0032651-T01-IM6	prad_cdk12_mskcc_2020:P-0032651-T01-IM6	prad_cdk12_mskcc_2020:P-0032651	0	NO	Prostate Cancer	Prostate Adenocarcinoma	0.0859	IMPACT468	MSKCC	Lymph Node	MICROSATELLITE STABLE (MSS). See MSI note below.	2.74	Stable	3	PRAD	Prostate	Tumor	1	277	Metastasis	Male	Matched	2.59409	40	NA	NA	NA	NA	NA	NA	NA	NA	NA	NA	NA	NA	NA	NA	NA	NA	NA	NA	NA	NA	NA	NA	NA
prad_cdk12_mskcc_2020	P-0032757	P-0032757-T01-IM6	prad_cdk12_mskcc_2020:P-0032757-T01-IM6	prad_cdk12_mskcc_2020:P-0032757	0	NO	Prostate Cancer	Prostate Adenocarcinoma	0.2023	IMPACT468	MSKCC	Bone	MICROSATELLITE STABLE (MSS). See MSI note below.	0.12	Stable	7	PRAD	Prostate	Tumor	1	390	Metastasis	Male	Matched	6.05289	50	NA	NA	NA	NA	NA	NA	NA	NA	NA	NA	NA	NA	NA	NA	NA	NA	NA	NA	NA	NA	NA	NA	NA
prad_cdk12_mskcc_2020	P-0032801	P-0032801-T01-IM6	prad_cdk12_mskcc_2020:P-0032801-T01-IM6	prad_cdk12_mskcc_2020:P-0032801	0	NO	Prostate Cancer	Prostate Adenocarcinoma	0.2745	IMPACT468	MSKCC	Lymph Node	MICROSATELLITE STABLE (MSS). See MSI note below.	1.96	Stable	3	PRAD	Prostate	Tumor	1	342	Metastasis	Male	Matched	2.59409	80	NA	NA	NA	NA	NA	NA	NA	NA	NA	NA	NA	NA	NA	NA	NA	NA	NA	NA	NA	NA	NA	NA	NA
prad_cdk12_mskcc_2020	P-0032868	P-0032868-T01-IM6	prad_cdk12_mskcc_2020:P-0032868-T01-IM6	prad_cdk12_mskcc_2020:P-0032868	0	NO	Prostate Cancer	Prostate Adenocarcinoma	0.0666	IMPACT468	MSKCC	Pleura	MICROSATELLITE STABLE (MSS). See MSI note below.	0.27	Stable	2	PRAD	Prostate	Tumor	1	603	Metastasis	Male	Matched	1.7294	70	NA	NA	NA	NA	NA	NA	NA	NA	NA	NA	NA	NA	NA	NA	NA	NA	NA	NA	NA	NA	NA	NA	NA
prad_cdk12_mskcc_2020	P-0033010	P-0033010-T01-IM6	prad_cdk12_mskcc_2020:P-0033010-T01-IM6	prad_cdk12_mskcc_2020:P-0033010	0	NO	Prostate Cancer	Prostate Adenocarcinoma	0.1752	IMPACT468	MSKCC	Lymph Node	MICROSATELLITE STABLE (MSS). See MSI note below.	0.24	Stable	1	PRAD	Prostate	Tumor	1	346	Metastasis	Male	Matched	0.864698	50	NA	NA	NA	NA	NA	NA	NA	NA	NA	NA	NA	NA	NA	NA	NA	NA	NA	NA	NA	NA	NA	NA	NA
prad_cdk12_mskcc_2020	P-0033175	P-0033175-T01-IM6	prad_cdk12_mskcc_2020:P-0033175-T01-IM6	prad_cdk12_mskcc_2020:P-0033175	0	NO	Prostate Cancer	Prostate Adenocarcinoma	0.0864	IMPACT468	MSKCC	Lung	MICROSATELLITE STABLE (MSS). See MSI note below.	0.07	Stable	4	PRAD	Prostate	Tumor	1	704	Metastasis	Male	Matched	3.45879	30	NA	NA	NA	NA	NA	NA	NA	NA	NA	NA	NA	NA	NA	NA	NA	NA	NA	NA	NA	NA	NA	NA	NA
prad_cdk12_mskcc_2020	P-0033767	P-0033767-T01-IM6	prad_cdk12_mskcc_2020:P-0033767-T01-IM6	prad_cdk12_mskcc_2020:P-0033767	0	NO	Prostate Cancer	Prostate Adenocarcinoma	0.4174	IMPACT468	MSKCC	Liver	MICROSATELLITE STABLE (MSS). See MSI note below.	1.08	Stable	5	PRAD	Prostate	Tumor	1	754	Metastasis	Male	Matched	4.32349	80	NA	NA	NA	NA	NA	NA	NA	NA	NA	NA	NA	NA	NA	NA	NA	NA	NA	NA	NA	NA	NA	NA	NA
prad_cdk12_mskcc_2020	P-0034378	P-0034378-T01-IM6	prad_cdk12_mskcc_2020:P-0034378-T01-IM6	prad_cdk12_mskcc_2020:P-0034378	0	NO	Prostate Cancer	Prostate Adenocarcinoma	0.0837	IMPACT468	MSKCC	Lymph Node	MICROSATELLITE STABLE (MSS). See MSI note below.	0.17	Stable	6	PRAD	Prostate	Tumor	1	306	Metastasis	Male	Matched	5.18819	20	NA	NA	NA	NA	NA	NA	NA	NA	NA	NA	NA	NA	NA	NA	NA	NA	NA	NA	NA	NA	NA	NA	NA
prad_cdk12_mskcc_2020	P-0037421	P-0037421-T01-IM6	prad_cdk12_mskcc_2020:P-0037421-T01-IM6	prad_cdk12_mskcc_2020:P-0037421	0	NO	Prostate Cancer	Prostate Adenocarcinoma	0.1528	IMPACT468	MSKCC	Lymph Node	MICROSATELLITE STABLE (MSS). See MSI note below.	0.2	Stable	5	PRAD	Prostate	Tumor	1	498	Metastasis	Male	Matched	4.32349	50	NA	NA	NA	NA	NA	NA	NA	NA	NA	NA	NA	NA	NA	NA	NA	NA	NA	NA	NA	NA	NA	NA	NA
prad_mich	WA10	WA10	prad_mich:WA10	prad_mich:WA10	0	NA	Prostate Cancer	Prostate Adenocarcinoma	0.4808	NA	NA	NA	NA	NA	NA	70	PRAD	Liver	NA	1	NA	Metastasis	Male	Matched	2.33333	NA	NA	NA	NA	NA	NA	NA	NA	NA	NA	NA	NA	NA	NA	NA	NA	NA	NA	NA	NA	78	No ETS	NA	Yes
prad_mich	WA11	WA11	prad_mich:WA11	prad_mich:WA11	0	NA	Prostate Cancer	Prostate Adenocarcinoma	0.4192	NA	NA	NA	NA	NA	NA	57	PRAD	Lung	NA	1	NA	Metastasis	Male	Matched	1.86667	NA	NA	NA	NA	NA	NA	NA	NA	NA	NA	NA	NA	NA	NA	NA	NA	NA	NA	NA	NA	67	No ETS	NA	Yes
prad_mich	WA12	WA12	prad_mich:WA12	prad_mich:WA12	0	NA	Prostate Cancer	Prostate Adenocarcinoma	0.715	NA	NA	NA	NA	NA	NA	79	PRAD	Soft tissue	NA	1	NA	Metastasis	Male	Unmatched	2.63333	NA	NA	NA	NA	NA	NA	NA	NA	NA	NA	NA	NA	NA	NA	NA	NA	NA	NA	NA	NA	79	ERG+ (small cell)	NA	No
prad_mich	WA13	WA13	prad_mich:WA13	prad_mich:WA13	0	NA	Prostate Cancer	Prostate Adenocarcinoma	0.834	NA	NA	NA	NA	NA	NA	40	PRAD	Soft tissue	NA	1	NA	Metastasis	Male	Matched	1.33333	NA	NA	NA	NA	NA	NA	NA	NA	NA	NA	NA	NA	NA	NA	NA	NA	NA	NA	NA	NA	71	ERG+	NA	Yes
prad_mich	WA14	WA14	prad_mich:WA14	prad_mich:WA14	0	NA	Prostate Cancer	Prostate Adenocarcinoma	0.6444	NA	NA	NA	NA	NA	NA	43	PRAD	Prostate	NA	1	NA	Metastasis	Male	Matched	1.43333	NA	NA	NA	NA	NA	NA	NA	NA	NA	NA	NA	NA	NA	NA	NA	NA	NA	NA	NA	NA	76	No ETS	NA	Yes
prad_mich	WA15	WA15	prad_mich:WA15	prad_mich:WA15	0	NA	Prostate Cancer	Prostate Adenocarcinoma	0.1903	NA	NA	NA	NA	NA	NA	38	PRAD	Lymph node	NA	1	NA	Metastasis	Male	Unmatched	1.26667	NA	NA	NA	NA	NA	NA	NA	NA	NA	NA	NA	NA	NA	NA	NA	NA	NA	NA	NA	NA	74	(ERG+)	NA	No
prad_mich	WA16	WA16	prad_mich:WA16	prad_mich:WA16	0	NA	Prostate Cancer	Prostate Adenocarcinoma	0.1056	NA	NA	NA	NA	NA	NA	730	PRAD	Diaphragm	NA	1	NA	Metastasis	Male	Matched	24.4	NA	NA	NA	NA	NA	NA	NA	NA	NA	NA	NA	NA	NA	NA	NA	NA	NA	NA	NA	NA	71	ERG+	NA	Yes
prad_mich	WA17	WA17	prad_mich:WA17	prad_mich:WA17	0	NA	Prostate Cancer	Prostate Adenocarcinoma	0.2975	NA	NA	NA	NA	NA	NA	36	PRAD	Liver	NA	1	NA	Metastasis	Male	Unmatched	1.2	NA	NA	NA	NA	NA	NA	NA	NA	NA	NA	NA	NA	NA	NA	NA	NA	NA	NA	NA	NA	75	No ETS	NA	No
prad_mich	WA18	WA18	prad_mich:WA18	prad_mich:WA18	0	NA	Prostate Cancer	Prostate Adenocarcinoma	0.2854	NA	NA	NA	NA	NA	NA	61	PRAD	Liver	NA	1	NA	Metastasis	Male	Matched	2.03333	NA	NA	NA	NA	NA	NA	NA	NA	NA	NA	NA	NA	NA	NA	NA	NA	NA	NA	NA	NA	62	ERG+	NA	Yes
prad_mich	WA19	WA19	prad_mich:WA19	prad_mich:WA19	0	NA	Prostate Cancer	Prostate Adenocarcinoma	0.2337	NA	NA	NA	NA	NA	NA	55	PRAD	Soft tissue	NA	1	NA	Metastasis	Male	Matched	1.83333	NA	NA	NA	NA	NA	NA	NA	NA	NA	NA	NA	NA	NA	NA	NA	NA	NA	NA	NA	NA	85	No ETS	NA	Yes
prad_mich	WA20	WA20	prad_mich:WA20	prad_mich:WA20	0	NA	Prostate Cancer	Prostate Adenocarcinoma	0.1972	NA	NA	NA	NA	NA	NA	30	PRAD	Liver	NA	1	NA	Metastasis	Male	Matched	1	NA	NA	NA	NA	NA	NA	NA	NA	NA	NA	NA	NA	NA	NA	NA	NA	NA	NA	NA	NA	67	No ETS	NA	Yes
prad_mich	WA22	WA22	prad_mich:WA22	prad_mich:WA22	0	NA	Prostate Cancer	Prostate Adenocarcinoma	0.6473	NA	NA	NA	NA	NA	NA	71	PRAD	Prostate	NA	1	NA	Metastasis	Male	Matched	2.36667	NA	NA	NA	NA	NA	NA	NA	NA	NA	NA	NA	NA	NA	NA	NA	NA	NA	NA	NA	NA	64	ERG+ (small cell)	NA	Yes
prad_mich	WA23	WA23	prad_mich:WA23	prad_mich:WA23	0	NA	Prostate Cancer	Prostate Adenocarcinoma	0.2204	NA	NA	NA	NA	NA	NA	53	PRAD	Bone marrow	NA	1	NA	Metastasis	Male	Matched	1.76667	NA	NA	NA	NA	NA	NA	NA	NA	NA	NA	NA	NA	NA	NA	NA	NA	NA	NA	NA	NA	73	ETV1+	NA	Yes
prad_mich	WA24	WA24	prad_mich:WA24	prad_mich:WA24	0	NA	Prostate Cancer	Prostate Adenocarcinoma	0.4083	NA	NA	NA	NA	NA	NA	28	PRAD	Liver	NA	1	NA	Metastasis	Male	Matched	0.933333	NA	NA	NA	NA	NA	NA	NA	NA	NA	NA	NA	NA	NA	NA	NA	NA	NA	NA	NA	NA	76	ERG+ (small cell)	NA	Yes
prad_mich	WA25	WA25	prad_mich:WA25	prad_mich:WA25	0	NA	Prostate Cancer	Prostate Adenocarcinoma	0.4412	NA	NA	NA	NA	NA	NA	45	PRAD	Soft tissue	NA	1	NA	Metastasis	Male	Matched	1.5	NA	NA	NA	NA	NA	NA	NA	NA	NA	NA	NA	NA	NA	NA	NA	NA	NA	NA	NA	NA	66	No ETS	NA	Yes
prad_mich	WA26	WA26	prad_mich:WA26	prad_mich:WA26	0	NA	Prostate Cancer	Prostate Adenocarcinoma	0.5164	NA	NA	NA	NA	NA	NA	89	PRAD	Lung	NA	1	NA	Metastasis	Male	Matched	2.96667	NA	NA	NA	NA	NA	NA	NA	NA	NA	NA	NA	NA	NA	NA	NA	NA	NA	NA	NA	NA	76	ETV1+	NA	Yes
prad_mich	WA27	WA27	prad_mich:WA27	prad_mich:WA27	0	NA	Prostate Cancer	Prostate Adenocarcinoma	0.1939	NA	NA	NA	NA	NA	NA	62	PRAD	Soft tissue	NA	1	NA	Metastasis	Male	Unmatched	2.06667	NA	NA	NA	NA	NA	NA	NA	NA	NA	NA	NA	NA	NA	NA	NA	NA	NA	NA	NA	NA	74	SPINK1+	NA	No
prad_mich	WA28	WA28	prad_mich:WA28	prad_mich:WA28	0	NA	Prostate Cancer	Prostate Adenocarcinoma	0.422	NA	NA	NA	NA	NA	NA	42	PRAD	Periaortic lymph node	NA	1	NA	Metastasis	Male	Matched	1.4	NA	NA	NA	NA	NA	NA	NA	NA	NA	NA	NA	NA	NA	NA	NA	NA	NA	NA	NA	NA	80	ERG+	NA	Yes
prad_mich	WA29	WA29	prad_mich:WA29	prad_mich:WA29	0	NA	Prostate Cancer	Prostate Adenocarcinoma	0.0628	NA	NA	NA	NA	NA	NA	36	PRAD	Soft tissue	NA	1	NA	Metastasis	Male	Matched	1.2	NA	NA	NA	NA	NA	NA	NA	NA	NA	NA	NA	NA	NA	NA	NA	NA	NA	NA	NA	NA	77	No ETS	NA	Yes
prad_mich	WA3	WA3	prad_mich:WA3	prad_mich:WA3	0	NA	Prostate Cancer	Prostate Adenocarcinoma	0.5519	NA	NA	NA	NA	NA	NA	36	PRAD	Soft tissue	NA	1	NA	Metastasis	Male	Matched	1.2	NA	NA	NA	NA	NA	NA	NA	NA	NA	NA	NA	NA	NA	NA	NA	NA	NA	NA	NA	NA	53	No ETS	NA	Yes
prad_mich	WA30	WA30	prad_mich:WA30	prad_mich:WA30	0	NA	Prostate Cancer	Prostate Adenocarcinoma	0.4778	NA	NA	NA	NA	NA	NA	52	PRAD	Soft tissue	NA	1	NA	Metastasis	Male	Matched	1.76667	NA	NA	NA	NA	NA	NA	NA	NA	NA	NA	NA	NA	NA	NA	NA	NA	NA	NA	NA	NA	71	No ETS	NA	Yes
prad_mich	WA31	WA31	prad_mich:WA31	prad_mich:WA31	0	NA	Prostate Cancer	Prostate Adenocarcinoma	0.5606	NA	NA	NA	NA	NA	NA	52	PRAD	Liver	NA	1	NA	Metastasis	Male	Matched	1.73333	NA	NA	NA	NA	NA	NA	NA	NA	NA	NA	NA	NA	NA	NA	NA	NA	NA	NA	NA	NA	63	ERG+	NA	Yes
prad_mich	WA32	WA32	prad_mich:WA32	prad_mich:WA32	0	NA	Prostate Cancer	Prostate Adenocarcinoma	0.4903	NA	NA	NA	NA	NA	NA	37	PRAD	Liver	NA	1	NA	Metastasis	Male	Matched	1.33333	NA	NA	NA	NA	NA	NA	NA	NA	NA	NA	NA	NA	NA	NA	NA	NA	NA	NA	NA	NA	81	No ETS	NA	Yes
prad_mich	WA33	WA33	prad_mich:WA33	prad_mich:WA33	0	NA	Prostate Cancer	Prostate Adenocarcinoma	0.5603	NA	NA	NA	NA	NA	NA	77	PRAD	Supraclavicular lymph node	NA	1	NA	Metastasis	Male	Matched	2.56667	NA	NA	NA	NA	NA	NA	NA	NA	NA	NA	NA	NA	NA	NA	NA	NA	NA	NA	NA	NA	58	No ETS	NA	Yes
prad_mich	WA35	WA35	prad_mich:WA35	prad_mich:WA35	0	NA	Prostate Cancer	Prostate Adenocarcinoma	0.4247	NA	NA	NA	NA	NA	NA	90	PRAD	Mesentery	NA	1	NA	Metastasis	Male	Matched	3	NA	NA	NA	NA	NA	NA	NA	NA	NA	NA	NA	NA	NA	NA	NA	NA	NA	NA	NA	NA	71	No ETS	NA	Yes
prad_mich	WA37	WA37	prad_mich:WA37	prad_mich:WA37	0	NA	Prostate Cancer	Prostate Adenocarcinoma	0.412	NA	NA	NA	NA	NA	NA	94	PRAD	Lung hilar lymph node	NA	1	NA	Metastasis	Male	Matched	3.13333	NA	NA	NA	NA	NA	NA	NA	NA	NA	NA	NA	NA	NA	NA	NA	NA	NA	NA	NA	NA	63	ERG+	NA	Yes
prad_mich	WA38	WA38	prad_mich:WA38	prad_mich:WA38	0	NA	Prostate Cancer	Prostate Adenocarcinoma	0.4999	NA	NA	NA	NA	NA	NA	39	PRAD	Liver	NA	1	NA	Metastasis	Male	Unmatched	1.3	NA	NA	NA	NA	NA	NA	NA	NA	NA	NA	NA	NA	NA	NA	NA	NA	NA	NA	NA	NA	77	No ETS	NA	No
prad_mich	WA39	WA39	prad_mich:WA39	prad_mich:WA39	0	NA	Prostate Cancer	Prostate Adenocarcinoma	0.2211	NA	NA	NA	NA	NA	NA	20	PRAD	Periaortic lymph node	NA	1	NA	Metastasis	Male	Matched	0.666667	NA	NA	NA	NA	NA	NA	NA	NA	NA	NA	NA	NA	NA	NA	NA	NA	NA	NA	NA	NA	71	ERG+	NA	Yes
prad_mich	WA40	WA40	prad_mich:WA40	prad_mich:WA40	0	NA	Prostate Cancer	Prostate Adenocarcinoma	0.7171	NA	NA	NA	NA	NA	NA	80	PRAD	Liver	NA	1	NA	Metastasis	Male	Matched	2.66667	NA	NA	NA	NA	NA	NA	NA	NA	NA	NA	NA	NA	NA	NA	NA	NA	NA	NA	NA	NA	76	ERG+	NA	Yes
prad_mich	WA41	WA41	prad_mich:WA41	prad_mich:WA41	0	NA	Prostate Cancer	Prostate Adenocarcinoma	0.2102	NA	NA	NA	NA	NA	NA	38	PRAD	Dura	NA	1	NA	Metastasis	Male	Unmatched	1.26667	NA	NA	NA	NA	NA	NA	NA	NA	NA	NA	NA	NA	NA	NA	NA	NA	NA	NA	NA	NA	70	No ETS	NA	No
prad_mich	WA42	WA42	prad_mich:WA42	prad_mich:WA42	0	NA	Prostate Cancer	Prostate Adenocarcinoma	0.4663	NA	NA	NA	NA	NA	NA	56	PRAD	Adrenal	NA	1	NA	Metastasis	Male	Matched	1.86667	NA	NA	NA	NA	NA	NA	NA	NA	NA	NA	NA	NA	NA	NA	NA	NA	NA	NA	NA	NA	61	No ETS	NA	Yes
prad_mich	WA43	WA43-27	prad_mich:WA43-27	prad_mich:WA43	0	NA	Prostate Cancer	Prostate Adenocarcinoma	0.5336	NA	NA	NA	NA	NA	NA	51	PRAD	Celiac lymph node	NA	3	NA	Metastasis	Male	Unmatched	1.7	NA	NA	NA	NA	NA	NA	NA	NA	NA	NA	NA	NA	NA	NA	NA	NA	NA	NA	NA	NA	52	No ETS	NA	No
prad_mich	WA46	WA46	prad_mich:WA46	prad_mich:WA46	0	NA	Prostate Cancer	Prostate Adenocarcinoma	0.4712	NA	NA	NA	NA	NA	NA	80	PRAD	Periaortic lymph node	NA	1	NA	Metastasis	Male	Matched	2.66667	NA	NA	NA	NA	NA	NA	NA	NA	NA	NA	NA	NA	NA	NA	NA	NA	NA	NA	NA	NA	71	No ETS	NA	Yes
prad_mich	WA47	WA47	prad_mich:WA47	prad_mich:WA47	0	NA	Prostate Cancer	Prostate Adenocarcinoma	0.3057	NA	NA	NA	NA	NA	NA	22	PRAD	Adrenal gland	NA	1	NA	Metastasis	Male	Matched	0.766667	NA	NA	NA	NA	NA	NA	NA	NA	NA	NA	NA	NA	NA	NA	NA	NA	NA	NA	NA	NA	64	SPINK1+	NA	Yes
prad_mich	WA48	WA48	prad_mich:WA48	prad_mich:WA48	0	NA	Prostate Cancer	Prostate Adenocarcinoma	0.5697	NA	NA	NA	NA	NA	NA	236	PRAD	Bone marrow	NA	1	NA	Metastasis	Male	Unmatched	7.83333	NA	NA	NA	NA	NA	NA	NA	NA	NA	NA	NA	NA	NA	NA	NA	NA	NA	NA	NA	NA	82	ERG+	NA	No
prad_mich	WA49	WA49	prad_mich:WA49	prad_mich:WA49	0	NA	Prostate Cancer	Prostate Adenocarcinoma	0.5598	NA	NA	NA	NA	NA	NA	31	PRAD	Periaortic lymph node	NA	1	NA	Metastasis	Male	Unmatched	1.03333	NA	NA	NA	NA	NA	NA	NA	NA	NA	NA	NA	NA	NA	NA	NA	NA	NA	NA	NA	NA	68	ERG+	NA	No
prad_mich	WA50	WA50	prad_mich:WA50	prad_mich:WA50	0	NA	Prostate Cancer	Prostate Adenocarcinoma	0.4126	NA	NA	NA	NA	NA	NA	90	PRAD	Subcarinal lymph node	NA	1	NA	Metastasis	Male	Unmatched	3	NA	NA	NA	NA	NA	NA	NA	NA	NA	NA	NA	NA	NA	NA	NA	NA	NA	NA	NA	NA	78	ERG+	NA	No
prad_mich	WA51	WA51	prad_mich:WA51	prad_mich:WA51	0	NA	Prostate Cancer	Prostate Adenocarcinoma	0.4546	NA	NA	NA	NA	NA	NA	43	PRAD	Bone marrow	NA	1	NA	Metastasis	Male	Unmatched	1.43333	NA	NA	NA	NA	NA	NA	NA	NA	NA	NA	NA	NA	NA	NA	NA	NA	NA	NA	NA	NA	65	No ETS	NA	No
prad_mich	WA52	WA52	prad_mich:WA52	prad_mich:WA52	0	NA	Prostate Cancer	Prostate Adenocarcinoma	0.2244	NA	NA	NA	NA	NA	NA	28	PRAD	Lung	NA	1	NA	Metastasis	Male	Unmatched	0.933333	NA	NA	NA	NA	NA	NA	NA	NA	NA	NA	NA	NA	NA	NA	NA	NA	NA	NA	NA	NA	80	ERG+	NA	No
prad_mich	WA53	WA53	prad_mich:WA53	prad_mich:WA53	0	NA	Prostate Cancer	Prostate Adenocarcinoma	0.4196	NA	NA	NA	NA	NA	NA	34	PRAD	Liver	NA	1	NA	Metastasis	Male	Matched	1.13333	NA	NA	NA	NA	NA	NA	NA	NA	NA	NA	NA	NA	NA	NA	NA	NA	NA	NA	NA	NA	68	ERG+	NA	Yes
prad_mich	WA54	WA54	prad_mich:WA54	prad_mich:WA54	0	NA	Prostate Cancer	Prostate Adenocarcinoma	0.3654	NA	NA	NA	NA	NA	NA	34	PRAD	Liver	NA	1	NA	Metastasis	Male	Matched	1.13333	NA	NA	NA	NA	NA	NA	NA	NA	NA	NA	NA	NA	NA	NA	NA	NA	NA	NA	NA	NA	73	ERG+	NA	Yes
prad_mich	WA55	WA55	prad_mich:WA55	prad_mich:WA55	0	NA	Prostate Cancer	Prostate Adenocarcinoma	0.5584	NA	NA	NA	NA	NA	NA	41	PRAD	Liver	NA	1	NA	Metastasis	Male	Matched	1.36667	NA	NA	NA	NA	NA	NA	NA	NA	NA	NA	NA	NA	NA	NA	NA	NA	NA	NA	NA	NA	72	ERG+	NA	Yes
prad_mich	WA56	WA56	prad_mich:WA56	prad_mich:WA56	0	NA	Prostate Cancer	Prostate Adenocarcinoma	0.4377	NA	NA	NA	NA	NA	NA	171	PRAD	Lymph node	NA	1	NA	Metastasis	Male	Unmatched	5.7	NA	NA	NA	NA	NA	NA	NA	NA	NA	NA	NA	NA	NA	NA	NA	NA	NA	NA	NA	NA	79	ERG+	NA	No
prad_mich	WA57	WA57	prad_mich:WA57	prad_mich:WA57	0	NA	Prostate Cancer	Prostate Adenocarcinoma	0.5667	NA	NA	NA	NA	NA	NA	94	PRAD	Liver	NA	1	NA	Metastasis	Male	Unmatched	3.16667	NA	NA	NA	NA	NA	NA	NA	NA	NA	NA	NA	NA	NA	NA	NA	NA	NA	NA	NA	NA	73	ERG+ (small cell)	NA	No
prad_mich	WA58	WA58	prad_mich:WA58	prad_mich:WA58	0	NA	Prostate Cancer	Prostate Adenocarcinoma	0.1104	NA	NA	NA	NA	NA	NA	34	PRAD	Lung	NA	1	NA	Metastasis	Male	Unmatched	1.13333	NA	NA	NA	NA	NA	NA	NA	NA	NA	NA	NA	NA	NA	NA	NA	NA	NA	NA	NA	NA	76	No ETS	NA	No
prad_mich	WA59	WA59	prad_mich:WA59	prad_mich:WA59	0	NA	Prostate Cancer	Prostate Adenocarcinoma	0.5352	NA	NA	NA	NA	NA	NA	31	PRAD	Iliac lymph node	NA	1	NA	Metastasis	Male	Unmatched	1.03333	NA	NA	NA	NA	NA	NA	NA	NA	NA	NA	NA	NA	NA	NA	NA	NA	NA	NA	NA	NA	59	No ETS	NA	No
prad_mich	WA60	WA60	prad_mich:WA60	prad_mich:WA60	0	NA	Prostate Cancer	Prostate Adenocarcinoma	0.696	NA	NA	NA	NA	NA	NA	27	PRAD	Paratracheal lymph node	NA	1	NA	Metastasis	Male	Unmatched	0.9	NA	NA	NA	NA	NA	NA	NA	NA	NA	NA	NA	NA	NA	NA	NA	NA	NA	NA	NA	NA	62	ERG+	NA	No
prad_mich	WA7	WA7	prad_mich:WA7	prad_mich:WA7	0	NA	Prostate Cancer	Prostate Adenocarcinoma	0.6947	NA	NA	NA	NA	NA	NA	38	PRAD	Soft tissue	NA	1	NA	Metastasis	Male	Matched	1.26667	NA	NA	NA	NA	NA	NA	NA	NA	NA	NA	NA	NA	NA	NA	NA	NA	NA	NA	NA	NA	66	No ETS	NA	Yes
prad_p1000	00-029N9_LN	00-029N9_LN	prad_p1000:00-029N9_LN	prad_p1000:00-029N9_LN	0	NA	Prostate Cancer	Prostate Adenocarcinoma	0.0006	NA	NA	Lymph Node	NA	NA	NA	52	PRAD	NA	NA	1	NA	Metastasis	Male	Matched	1.73333	NA	NA	NA	NA	NA	NA	NA	NA	NA	NA	NA	NA	NA	NA	NA	NA	NA	NA	NA	NA	NA	NA	NA	NA
prad_p1000	01-087MM_BONE	01-087MM_BONE	prad_p1000:01-087MM_BONE	prad_p1000:01-087MM_BONE	0	NA	Prostate Cancer	Prostate Adenocarcinoma	0.158	NA	NA	Bone	NA	NA	NA	47	PRAD	NA	NA	1	NA	Metastasis	Male	Matched	1.56667	NA	NA	NA	NA	NA	NA	NA	NA	NA	NA	NA	NA	NA	NA	NA	NA	NA	NA	NA	NA	NA	NA	NA	NA
prad_p1000	01-095N1_LN	01-095N1_LN	prad_p1000:01-095N1_LN	prad_p1000:01-095N1_LN	0	NA	Prostate Cancer	Prostate Adenocarcinoma	0.0049	NA	NA	Lymph Node	NA	NA	NA	174	PRAD	NA	NA	1	NA	Metastasis	Male	Matched	5.8	NA	NA	NA	NA	NA	NA	NA	NA	NA	NA	NA	NA	NA	NA	NA	NA	NA	NA	NA	NA	NA	NA	NA	NA
prad_p1000	01-120A1_LIVER	01-120A1_LIVER	prad_p1000:01-120A1_LIVER	prad_p1000:01-120A1_LIVER	0	NA	Prostate Cancer	Prostate Adenocarcinoma	0.0122	NA	NA	Liver	NA	NA	NA	63	PRAD	NA	NA	1	NA	Metastasis	Male	Matched	2.1	NA	NA	NA	NA	NA	NA	NA	NA	NA	NA	NA	NA	NA	NA	NA	NA	NA	NA	NA	NA	NA	NA	NA	NA
prad_p1000	02-083E1_LN	02-083E1_LN	prad_p1000:02-083E1_LN	prad_p1000:02-083E1_LN	0	NA	Prostate Cancer	Prostate Adenocarcinoma	0.0263	NA	NA	Lymph Node	NA	NA	NA	31	PRAD	NA	NA	1	NA	Metastasis	Male	Matched	1.03333	NA	NA	NA	NA	NA	NA	NA	NA	NA	NA	NA	NA	NA	NA	NA	NA	NA	NA	NA	NA	NA	NA	NA	NA
prad_p1000	03-082H1_LIVER	03-082H1_LIVER	prad_p1000:03-082H1_LIVER	prad_p1000:03-082H1_LIVER	0	NA	Prostate Cancer	Prostate Adenocarcinoma	0.0489	NA	NA	Liver	NA	NA	NA	67	PRAD	NA	NA	1	NA	Metastasis	Male	Matched	2.23333	NA	NA	NA	NA	NA	NA	NA	NA	NA	NA	NA	NA	NA	NA	NA	NA	NA	NA	NA	NA	NA	NA	NA	NA
prad_p1000	03-130L_RETROPERITONEAL	03-130L_RETROPERITONEAL	prad_p1000:03-130L_RETROPERITONEAL	prad_p1000:03-130L_RETROPERITONEAL	0	NA	Prostate Cancer	Prostate Adenocarcinoma	0.1097	NA	NA	Retroperitoneal	NA	NA	NA	372	PRAD	NA	NA	1	NA	Metastasis	Male	Matched	12.4333	NA	NA	NA	NA	NA	NA	NA	NA	NA	NA	NA	NA	NA	NA	NA	NA	NA	NA	NA	NA	NA	NA	NA	NA
prad_p1000	03-139E3_RETROPERITONEAL	03-139E3_RETROPERITONEAL	prad_p1000:03-139E3_RETROPERITONEAL	prad_p1000:03-139E3_RETROPERITONEAL	0	NA	Prostate Cancer	Prostate Adenocarcinoma	0.1338	NA	NA	Retroperitoneal	NA	NA	NA	32	PRAD	NA	NA	1	NA	Metastasis	Male	Matched	1.06667	NA	NA	NA	NA	NA	NA	NA	NA	NA	NA	NA	NA	NA	NA	NA	NA	NA	NA	NA	NA	NA	NA	NA	NA
prad_p1000	03-163S4_LIVER	03-163S4_LIVER	prad_p1000:03-163S4_LIVER	prad_p1000:03-163S4_LIVER	0	NA	Prostate Cancer	Prostate Adenocarcinoma	0.0005	NA	NA	Liver	NA	NA	NA	47	PRAD	NA	NA	1	NA	Metastasis	Male	Matched	1.56667	NA	NA	NA	NA	NA	NA	NA	NA	NA	NA	NA	NA	NA	NA	NA	NA	NA	NA	NA	NA	NA	NA	NA	NA
prad_p1000	03-192B_LUNG	03-192B_LUNG	prad_p1000:03-192B_LUNG	prad_p1000:03-192B_LUNG	0	NA	Prostate Cancer	Prostate Adenocarcinoma	0.0408	NA	NA	Lung	NA	NA	NA	62	PRAD	NA	NA	1	NA	Metastasis	Male	Matched	2.1	NA	NA	NA	NA	NA	NA	NA	NA	NA	NA	NA	NA	NA	NA	NA	NA	NA	NA	NA	NA	NA	NA	NA	NA
prad_p1000	04-149E2_LN	04-149E2_LN	prad_p1000:04-149E2_LN	prad_p1000:04-149E2_LN	0	NA	Prostate Cancer	Prostate Adenocarcinoma	0.0058	NA	NA	Lymph Node	NA	NA	NA	135	PRAD	NA	NA	1	NA	Metastasis	Male	Matched	4.5	NA	NA	NA	NA	NA	NA	NA	NA	NA	NA	NA	NA	NA	NA	NA	NA	NA	NA	NA	NA	NA	NA	NA	NA
prad_p1000	05-011G4_LUNG	05-011G4_LUNG	prad_p1000:05-011G4_LUNG	prad_p1000:05-011G4_LUNG	0	NA	Prostate Cancer	Prostate Adenocarcinoma	0.0001	NA	NA	Lung	NA	NA	NA	116	PRAD	NA	NA	1	NA	Metastasis	Male	Matched	3.86667	NA	NA	NA	NA	NA	NA	NA	NA	NA	NA	NA	NA	NA	NA	NA	NA	NA	NA	NA	NA	NA	NA	NA	NA
prad_p1000	05-116F_LUNG	05-116F_LUNG	prad_p1000:05-116F_LUNG	prad_p1000:05-116F_LUNG	0	NA	Prostate Cancer	Prostate Adenocarcinoma	0.0134	NA	NA	Lung	NA	NA	NA	39	PRAD	NA	NA	1	NA	Metastasis	Male	Matched	1.3	NA	NA	NA	NA	NA	NA	NA	NA	NA	NA	NA	NA	NA	NA	NA	NA	NA	NA	NA	NA	NA	NA	NA	NA
prad_p1000	05-148E3_LIVER	05-148E3_LIVER	prad_p1000:05-148E3_LIVER	prad_p1000:05-148E3_LIVER	0	NA	Prostate Cancer	Prostate Adenocarcinoma	0.0002	NA	NA	Liver	NA	NA	NA	23	PRAD	NA	NA	1	NA	Metastasis	Male	Matched	0.766667	NA	NA	NA	NA	NA	NA	NA	NA	NA	NA	NA	NA	NA	NA	NA	NA	NA	NA	NA	NA	NA	NA	NA	NA
prad_p1000	05-165O_ADRENAL	05-165O_ADRENAL	prad_p1000:05-165O_ADRENAL	prad_p1000:05-165O_ADRENAL	0	NA	Prostate Cancer	Prostate Adenocarcinoma	0.1066	NA	NA	Adrenal	NA	NA	NA	822	PRAD	NA	NA	1	NA	Metastasis	Male	Matched	27.4	NA	NA	NA	NA	NA	NA	NA	NA	NA	NA	NA	NA	NA	NA	NA	NA	NA	NA	NA	NA	NA	NA	NA	NA
prad_p1000	05-214BB2_BONE	05-214BB2_BONE	prad_p1000:05-214BB2_BONE	prad_p1000:05-214BB2_BONE	0	NA	Prostate Cancer	Prostate Adenocarcinoma	0.0294	NA	NA	Bone	NA	NA	NA	70	PRAD	NA	NA	1	NA	Metastasis	Male	Matched	2.33333	NA	NA	NA	NA	NA	NA	NA	NA	NA	NA	NA	NA	NA	NA	NA	NA	NA	NA	NA	NA	NA	NA	NA	NA
prad_p1000	05-217L3_LUNG	05-217L3_LUNG	prad_p1000:05-217L3_LUNG	prad_p1000:05-217L3_LUNG	0	NA	Prostate Cancer	Prostate Adenocarcinoma	0.0766	NA	NA	Lung	NA	NA	NA	28	PRAD	NA	NA	1	NA	Metastasis	Male	Matched	0.933333	NA	NA	NA	NA	NA	NA	NA	NA	NA	NA	NA	NA	NA	NA	NA	NA	NA	NA	NA	NA	NA	NA	NA	NA
prad_p1000	05-221MM1_BONE	05-221MM1_BONE	prad_p1000:05-221MM1_BONE	prad_p1000:05-221MM1_BONE	0	NA	Prostate Cancer	Prostate Adenocarcinoma	0.007	NA	NA	Bone	NA	NA	NA	14	PRAD	NA	NA	1	NA	Metastasis	Male	Matched	0.466667	NA	NA	NA	NA	NA	NA	NA	NA	NA	NA	NA	NA	NA	NA	NA	NA	NA	NA	NA	NA	NA	NA	NA	NA
prad_p1000	06-134H1_LN	06-134H1_LN	prad_p1000:06-134H1_LN	prad_p1000:06-134H1_LN	0	NA	Prostate Cancer	Prostate Adenocarcinoma	0.0346	NA	NA	Lymph Node	NA	NA	NA	388	PRAD	NA	NA	1	NA	Metastasis	Male	Matched	12.9333	NA	NA	NA	NA	NA	NA	NA	NA	NA	NA	NA	NA	NA	NA	NA	NA	NA	NA	NA	NA	NA	NA	NA	NA
prad_p1000	07-042H2_LN	07-042H2_LN	prad_p1000:07-042H2_LN	prad_p1000:07-042H2_LN	0	NA	Prostate Cancer	Prostate Adenocarcinoma	0.0132	NA	NA	Lymph Node	NA	NA	NA	63	PRAD	NA	NA	1	NA	Metastasis	Male	Matched	2.1	NA	NA	NA	NA	NA	NA	NA	NA	NA	NA	NA	NA	NA	NA	NA	NA	NA	NA	NA	NA	NA	NA	NA	NA
prad_p1000	07-062F2_LUNG	07-062F2_LUNG	prad_p1000:07-062F2_LUNG	prad_p1000:07-062F2_LUNG	0	NA	Prostate Cancer	Prostate Adenocarcinoma	0.1646	NA	NA	Lung	NA	NA	NA	76	PRAD	NA	NA	1	NA	Metastasis	Male	Matched	2.53333	NA	NA	NA	NA	NA	NA	NA	NA	NA	NA	NA	NA	NA	NA	NA	NA	NA	NA	NA	NA	NA	NA	NA	NA
prad_p1000	08-006H1_LN	08-006H1_LN	prad_p1000:08-006H1_LN	prad_p1000:08-006H1_LN	0	NA	Prostate Cancer	Prostate Adenocarcinoma	0.0167	NA	NA	Lymph Node	NA	NA	NA	28	PRAD	NA	NA	1	NA	Metastasis	Male	Matched	0.933333	NA	NA	NA	NA	NA	NA	NA	NA	NA	NA	NA	NA	NA	NA	NA	NA	NA	NA	NA	NA	NA	NA	NA	NA
prad_p1000	08-037F1_LIVER	08-037F1_LIVER	prad_p1000:08-037F1_LIVER	prad_p1000:08-037F1_LIVER	0	NA	Prostate Cancer	Prostate Adenocarcinoma	0.0064	NA	NA	Liver	NA	NA	NA	26	PRAD	NA	NA	1	NA	Metastasis	Male	Matched	0.866667	NA	NA	NA	NA	NA	NA	NA	NA	NA	NA	NA	NA	NA	NA	NA	NA	NA	NA	NA	NA	NA	NA	NA	NA
prad_p1000	08-093J1_LN	08-093J1_LN	prad_p1000:08-093J1_LN	prad_p1000:08-093J1_LN	0	NA	Prostate Cancer	Prostate Adenocarcinoma	0.1734	NA	NA	Lymph Node	NA	NA	NA	33	PRAD	NA	NA	1	NA	Metastasis	Male	Matched	1.1	NA	NA	NA	NA	NA	NA	NA	NA	NA	NA	NA	NA	NA	NA	NA	NA	NA	NA	NA	NA	NA	NA	NA	NA
prad_p1000	09-006F1_RENAL	09-006F1_RENAL	prad_p1000:09-006F1_RENAL	prad_p1000:09-006F1_RENAL	0	NA	Prostate Cancer	Prostate Adenocarcinoma	0.0003	NA	NA	Renal	NA	NA	NA	167	PRAD	NA	NA	1	NA	Metastasis	Male	Matched	5.6	NA	NA	NA	NA	NA	NA	NA	NA	NA	NA	NA	NA	NA	NA	NA	NA	NA	NA	NA	NA	NA	NA	NA	NA
prad_p1000	10-013F1_LN	10-013F1_LN	prad_p1000:10-013F1_LN	prad_p1000:10-013F1_LN	0	NA	Prostate Cancer	Prostate Adenocarcinoma	0.003	NA	NA	Lymph Node	NA	NA	NA	46	PRAD	NA	NA	1	NA	Metastasis	Male	Matched	1.53333	NA	NA	NA	NA	NA	NA	NA	NA	NA	NA	NA	NA	NA	NA	NA	NA	NA	NA	NA	NA	NA	NA	NA	NA
prad_p1000	11-028L1_LUNG	11-028L1_LUNG	prad_p1000:11-028L1_LUNG	prad_p1000:11-028L1_LUNG	0	NA	Prostate Cancer	Prostate Adenocarcinoma	0.0108	NA	NA	Lung	NA	NA	NA	126	PRAD	NA	NA	1	NA	Metastasis	Male	Matched	4.2	NA	NA	NA	NA	NA	NA	NA	NA	NA	NA	NA	NA	NA	NA	NA	NA	NA	NA	NA	NA	NA	NA	NA	NA
prad_p1000	11040	11040	prad_p1000:11040	prad_p1000:11040	0	NA	Prostate Cancer	Prostate Adenocarcinoma	0.3823	NA	NA	Lymph Node	NA	NA	NA	83	PRAD	NA	NA	1	NA	Metastasis	Male	Matched	2.76667	NA	NA	NA	NA	NA	NA	NA	NA	NA	NA	NA	NA	NA	NA	NA	NA	NA	NA	NA	NA	NA	NA	NA	NA
prad_p1000	12-011I7_LN	12-011I7_LN	prad_p1000:12-011I7_LN	prad_p1000:12-011I7_LN	0	NA	Prostate Cancer	Prostate Adenocarcinoma	0.436	NA	NA	Lymph Node	NA	NA	NA	54	PRAD	NA	NA	1	NA	Metastasis	Male	Matched	1.8	NA	NA	NA	NA	NA	NA	NA	NA	NA	NA	NA	NA	NA	NA	NA	NA	NA	NA	NA	NA	NA	NA	NA	NA
prad_p1000	12-021H4_LIVER	12-021H4_LIVER	prad_p1000:12-021H4_LIVER	prad_p1000:12-021H4_LIVER	0	NA	Prostate Cancer	Prostate Adenocarcinoma	0.0081	NA	NA	NA	NA	NA	NA	55	PRAD	NA	NA	1	NA	Metastasis	Male	Matched	1.83333	NA	NA	NA	NA	NA	NA	NA	NA	NA	NA	NA	NA	NA	NA	NA	NA	NA	NA	NA	NA	NA	NA	NA	NA
prad_p1000	12728	12728	prad_p1000:12728	prad_p1000:12728	0	NA	Prostate Cancer	Prostate Adenocarcinoma	0.1304	NA	NA	NA	NA	NA	NA	79	PRAD	NA	NA	1	NA	Metastasis	Male	Matched	2.63333	NA	NA	NA	NA	NA	NA	NA	NA	NA	NA	NA	NA	NA	NA	NA	NA	NA	NA	NA	NA	NA	NA	NA	NA
prad_p1000	20870	20870	prad_p1000:20870	prad_p1000:20870	0	NA	Prostate Cancer	Prostate Adenocarcinoma	0.2577	NA	NA	Lymph Node	NA	NA	NA	78	PRAD	NA	NA	1	NA	Metastasis	Male	Matched	2.6	NA	NA	NA	NA	NA	NA	NA	NA	NA	NA	NA	NA	NA	NA	NA	NA	NA	NA	NA	NA	NA	NA	NA	NA
prad_p1000	24290	24290	prad_p1000:24290	prad_p1000:24290	0	NA	Prostate Cancer	Prostate Adenocarcinoma	0.3805	NA	NA	Prostate	NA	NA	NA	95	PRAD	NA	NA	1	NA	Metastasis	Male	Matched	3.16667	NA	NA	NA	NA	NA	NA	NA	NA	NA	NA	NA	NA	NA	NA	NA	NA	NA	NA	NA	NA	NA	NA	NA	NA
prad_p1000	24852	24852	prad_p1000:24852	prad_p1000:24852	0	NA	Prostate Cancer	Prostate Adenocarcinoma	0.1416	NA	NA	NA	NA	NA	NA	29	PRAD	NA	NA	1	NA	Metastasis	Male	Matched	0.966667	NA	NA	NA	NA	NA	NA	NA	NA	NA	NA	NA	NA	NA	NA	NA	NA	NA	NA	NA	NA	NA	NA	NA	NA
prad_p1000	24854	24854	prad_p1000:24854	prad_p1000:24854	0	NA	Prostate Cancer	Prostate Adenocarcinoma	0.2778	NA	NA	NA	NA	NA	NA	27	PRAD	NA	NA	1	NA	Metastasis	Male	Matched	0.9	NA	NA	NA	NA	NA	NA	NA	NA	NA	NA	NA	NA	NA	NA	NA	NA	NA	NA	NA	NA	NA	NA	NA	NA
prad_p1000	7951	7951	prad_p1000:7951	prad_p1000:7951	0	NA	Prostate Cancer	Prostate Adenocarcinoma	0.2213	NA	NA	NA	NA	NA	NA	107	PRAD	NA	NA	1	NA	Metastasis	Male	Matched	3.56667	NA	NA	NA	NA	NA	NA	NA	NA	NA	NA	NA	NA	NA	NA	NA	NA	NA	NA	NA	NA	NA	NA	NA	NA
prad_p1000	97-159H2_LIVER	97-159H2_LIVER	prad_p1000:97-159H2_LIVER	prad_p1000:97-159H2_LIVER	0	NA	Prostate Cancer	Prostate Adenocarcinoma	0.0021	NA	NA	Liver	NA	NA	NA	18	PRAD	NA	NA	1	NA	Metastasis	Male	Matched	0.6	NA	NA	NA	NA	NA	NA	NA	NA	NA	NA	NA	NA	NA	NA	NA	NA	NA	NA	NA	NA	NA	NA	NA	NA
prad_p1000	98-328K_PERITONEUM	98-328K_PERITONEUM	prad_p1000:98-328K_PERITONEUM	prad_p1000:98-328K_PERITONEUM	0	NA	Prostate Cancer	Prostate Adenocarcinoma	0.0207	NA	NA	Peritoneum	NA	NA	NA	28	PRAD	NA	NA	1	NA	Metastasis	Male	Matched	0.933333	NA	NA	NA	NA	NA	NA	NA	NA	NA	NA	NA	NA	NA	NA	NA	NA	NA	NA	NA	NA	NA	NA	NA	NA
prad_p1000	98-362B1_LN	98-362B1_LN	prad_p1000:98-362B1_LN	prad_p1000:98-362B1_LN	0	NA	Prostate Cancer	Prostate Adenocarcinoma	0.1921	NA	NA	Lymph Node	NA	NA	NA	36	PRAD	NA	NA	1	NA	Metastasis	Male	Matched	1.2	NA	NA	NA	NA	NA	NA	NA	NA	NA	NA	NA	NA	NA	NA	NA	NA	NA	NA	NA	NA	NA	NA	NA	NA
prad_p1000	98-372L_LN	98-372L_LN	prad_p1000:98-372L_LN	prad_p1000:98-372L_LN	0	NA	Prostate Cancer	Prostate Adenocarcinoma	0.0064	NA	NA	Lymph Node	NA	NA	NA	54	PRAD	NA	NA	1	NA	Metastasis	Male	Matched	1.8	NA	NA	NA	NA	NA	NA	NA	NA	NA	NA	NA	NA	NA	NA	NA	NA	NA	NA	NA	NA	NA	NA	NA	NA
prad_p1000	99-064O_LN	99-064O_LN	prad_p1000:99-064O_LN	prad_p1000:99-064O_LN	0	NA	Prostate Cancer	Prostate Adenocarcinoma	0.0072	NA	NA	Lymph Node	NA	NA	NA	24	PRAD	NA	NA	1	NA	Metastasis	Male	Matched	0.8	NA	NA	NA	NA	NA	NA	NA	NA	NA	NA	NA	NA	NA	NA	NA	NA	NA	NA	NA	NA	NA	NA	NA	NA
prad_p1000	99-090A2_LIVER	99-090A2_LIVER	prad_p1000:99-090A2_LIVER	prad_p1000:99-090A2_LIVER	0	NA	Prostate Cancer	Prostate Adenocarcinoma	0.0026	NA	NA	Liver	NA	NA	NA	36	PRAD	NA	NA	1	NA	Metastasis	Male	Matched	1.2	NA	NA	NA	NA	NA	NA	NA	NA	NA	NA	NA	NA	NA	NA	NA	NA	NA	NA	NA	NA	NA	NA	NA	NA
prad_p1000	99-091J_LN	99-091J_LN	prad_p1000:99-091J_LN	prad_p1000:99-091J_LN	0	NA	Prostate Cancer	Prostate Adenocarcinoma	0.0631	NA	NA	Lymph Node	NA	NA	NA	40	PRAD	NA	NA	1	NA	Metastasis	Male	Matched	1.33333	NA	NA	NA	NA	NA	NA	NA	NA	NA	NA	NA	NA	NA	NA	NA	NA	NA	NA	NA	NA	NA	NA	NA	NA
prad_p1000	MO_1008	MO_1008	prad_p1000:MO_1008	prad_p1000:MO_1008	0	NA	Prostate Cancer	Prostate Adenocarcinoma	0.4094	NA	NA	Dura	NA	NA	NA	61	PRAD	NA	NA	1	NA	Metastasis	Male	Matched	2.03333	NA	NA	NA	NA	NA	NA	NA	NA	NA	NA	NA	NA	NA	NA	NA	NA	NA	NA	NA	NA	47	NA	NA	NA
prad_p1000	MO_1012	MO_1012	prad_p1000:MO_1012	prad_p1000:MO_1012	0	NA	Prostate Cancer	Prostate Adenocarcinoma	0.4582	NA	NA	Subcutaneous nodule	NA	NA	NA	1252	PRAD	NA	NA	1	NA	Metastasis	Male	Matched	41.7333	NA	NA	NA	NA	NA	NA	NA	NA	NA	NA	NA	NA	NA	NA	NA	NA	NA	NA	NA	NA	71	NA	NA	NA
prad_p1000	MO_1013	MO_1013	prad_p1000:MO_1013	prad_p1000:MO_1013	0	NA	Prostate Cancer	Prostate Adenocarcinoma	0.5075	NA	NA	Lymph node	NA	NA	NA	216	PRAD	NA	NA	1	NA	Metastasis	Male	Matched	7.2	NA	NA	NA	NA	NA	NA	NA	NA	NA	NA	NA	NA	NA	NA	NA	NA	NA	NA	NA	NA	55	NA	NA	NA
prad_p1000	MO_1014	MO_1014	prad_p1000:MO_1014	prad_p1000:MO_1014	0	NA	Prostate Cancer	Prostate Adenocarcinoma	0.5219	NA	NA	Lymph node	NA	NA	NA	118	PRAD	NA	NA	1	NA	Metastasis	Male	Matched	3.96667	NA	NA	NA	NA	NA	NA	NA	NA	NA	NA	NA	NA	NA	NA	NA	NA	NA	NA	NA	NA	65	NA	NA	NA
prad_p1000	MO_1015	MO_1015	prad_p1000:MO_1015	prad_p1000:MO_1015	0	NA	Prostate Cancer	Prostate Adenocarcinoma	0.6921	NA	NA	Lymph node	NA	NA	NA	53	PRAD	NA	NA	1	NA	Metastasis	Male	Matched	1.76667	NA	NA	NA	NA	NA	NA	NA	NA	NA	NA	NA	NA	NA	NA	NA	NA	NA	NA	NA	NA	75	NA	NA	NA
prad_p1000	MO_1020	MO_1020	prad_p1000:MO_1020	prad_p1000:MO_1020	0	NA	Prostate Cancer	Prostate Adenocarcinoma	0.3289	NA	NA	Liver	NA	NA	NA	49	PRAD	NA	NA	1	NA	Metastasis	Male	Matched	1.63333	NA	NA	NA	NA	NA	NA	NA	NA	NA	NA	NA	NA	NA	NA	NA	NA	NA	NA	NA	NA	63	NA	NA	NA
prad_p1000	MO_1021	MO_1021	prad_p1000:MO_1021	prad_p1000:MO_1021	0	NA	Prostate Cancer	Prostate Adenocarcinoma	0.003	NA	NA	Prostate	NA	NA	NA	2	PRAD	NA	NA	1	NA	Metastasis	Male	Matched	0.0666667	NA	NA	NA	NA	NA	NA	NA	NA	NA	NA	NA	NA	NA	NA	NA	NA	NA	NA	NA	NA	59	NA	NA	NA
prad_p1000	MO_1040	MO_1040	prad_p1000:MO_1040	prad_p1000:MO_1040	0	NA	Prostate Cancer	Prostate Adenocarcinoma	0.1284	NA	NA	Lymph node	NA	NA	NA	49	PRAD	NA	NA	1	NA	Metastasis	Male	Matched	1.63333	NA	NA	NA	NA	NA	NA	NA	NA	NA	NA	NA	NA	NA	NA	NA	NA	NA	NA	NA	NA	68	NA	NA	NA
prad_p1000	MO_1054	MO_1054	prad_p1000:MO_1054	prad_p1000:MO_1054	0	NA	Prostate Cancer	Prostate Adenocarcinoma	0.1496	NA	NA	Prostate	NA	NA	NA	38	PRAD	NA	NA	1	NA	Metastasis	Male	Matched	1.26667	NA	NA	NA	NA	NA	NA	NA	NA	NA	NA	NA	NA	NA	NA	NA	NA	NA	NA	NA	NA	56	NA	NA	NA
prad_p1000	MO_1071	MO_1071	prad_p1000:MO_1071	prad_p1000:MO_1071	0	NA	Prostate Cancer	Prostate Adenocarcinoma	0.1364	NA	NA	Prostate	NA	NA	NA	36	PRAD	NA	NA	1	NA	Metastasis	Male	Matched	1.2	NA	NA	NA	NA	NA	NA	NA	NA	NA	NA	NA	NA	NA	NA	NA	NA	NA	NA	NA	NA	54	NA	NA	NA
prad_p1000	MO_1074	MO_1074	prad_p1000:MO_1074	prad_p1000:MO_1074	0	NA	Prostate Cancer	Prostate Adenocarcinoma	0.2199	NA	NA	Bone	NA	NA	NA	78	PRAD	NA	NA	1	NA	Metastasis	Male	Matched	2.6	NA	NA	NA	NA	NA	NA	NA	NA	NA	NA	NA	NA	NA	NA	NA	NA	NA	NA	NA	NA	69	NA	NA	NA
prad_p1000	MO_1084	MO_1084	prad_p1000:MO_1084	prad_p1000:MO_1084	0	NA	Prostate Cancer	Prostate Adenocarcinoma	0.5412	NA	NA	Lymph node	NA	NA	NA	57	PRAD	NA	NA	1	NA	Metastasis	Male	Matched	1.9	NA	NA	NA	NA	NA	NA	NA	NA	NA	NA	NA	NA	NA	NA	NA	NA	NA	NA	NA	NA	77	NA	NA	NA
prad_p1000	MO_1094	MO_1094	prad_p1000:MO_1094	prad_p1000:MO_1094	0	NA	Prostate Cancer	Prostate Adenocarcinoma	0.2937	NA	NA	Bone	NA	NA	NA	34	PRAD	NA	NA	1	NA	Metastasis	Male	Matched	1.13333	NA	NA	NA	NA	NA	NA	NA	NA	NA	NA	NA	NA	NA	NA	NA	NA	NA	NA	NA	NA	67	NA	NA	NA
prad_p1000	MO_1095	MO_1095	prad_p1000:MO_1095	prad_p1000:MO_1095	0	NA	Prostate Cancer	Prostate Adenocarcinoma	0.4221	NA	NA	Thoracic epidural mass	NA	NA	NA	44	PRAD	NA	NA	1	NA	Metastasis	Male	Matched	1.46667	NA	NA	NA	NA	NA	NA	NA	NA	NA	NA	NA	NA	NA	NA	NA	NA	NA	NA	NA	NA	72	NA	NA	NA
prad_p1000	MO_1096	MO_1096	prad_p1000:MO_1096	prad_p1000:MO_1096	0	NA	Prostate Cancer	Prostate Adenocarcinoma	0.3159	NA	NA	Bone	NA	NA	NA	55	PRAD	NA	NA	1	NA	Metastasis	Male	Matched	1.83333	NA	NA	NA	NA	NA	NA	NA	NA	NA	NA	NA	NA	NA	NA	NA	NA	NA	NA	NA	NA	66	NA	NA	NA
prad_p1000	MO_1105	MO_1105	prad_p1000:MO_1105	prad_p1000:MO_1105	0	NA	Prostate Cancer	Prostate Adenocarcinoma	0.0541	NA	NA	Lymph Node	NA	NA	NA	195	PRAD	NA	NA	1	NA	Metastasis	Male	Matched	6.53333	NA	NA	NA	NA	NA	NA	NA	NA	NA	NA	NA	NA	NA	NA	NA	NA	NA	NA	NA	NA	61	NA	NA	NA
prad_p1000	MO_1114	MO_1114	prad_p1000:MO_1114	prad_p1000:MO_1114	0	NA	Prostate Cancer	Prostate Adenocarcinoma	0.6862	NA	NA	Lymph node	NA	NA	NA	52	PRAD	NA	NA	1	NA	Metastasis	Male	Matched	1.73333	NA	NA	NA	NA	NA	NA	NA	NA	NA	NA	NA	NA	NA	NA	NA	NA	NA	NA	NA	NA	62	NA	NA	NA
prad_p1000	MO_1118	MO_1118	prad_p1000:MO_1118	prad_p1000:MO_1118	0	NA	Prostate Cancer	Prostate Adenocarcinoma	0.2424	NA	NA	Liver	NA	NA	NA	42	PRAD	NA	NA	1	NA	Metastasis	Male	Matched	1.4	NA	NA	NA	NA	NA	NA	NA	NA	NA	NA	NA	NA	NA	NA	NA	NA	NA	NA	NA	NA	73	NA	NA	NA
prad_p1000	MO_1124	MO_1124	prad_p1000:MO_1124	prad_p1000:MO_1124	0	NA	Prostate Cancer	Prostate Adenocarcinoma	0.3973	NA	NA	Bladder	NA	NA	NA	70	PRAD	NA	NA	1	NA	Metastasis	Male	Matched	2.33333	NA	NA	NA	NA	NA	NA	NA	NA	NA	NA	NA	NA	NA	NA	NA	NA	NA	NA	NA	NA	66	NA	NA	NA
prad_p1000	MO_1128	MO_1128	prad_p1000:MO_1128	prad_p1000:MO_1128	0	NA	Prostate Cancer	Prostate Adenocarcinoma	0.3152	NA	NA	Lymph node	NA	NA	NA	50	PRAD	NA	NA	1	NA	Metastasis	Male	Matched	1.66667	NA	NA	NA	NA	NA	NA	NA	NA	NA	NA	NA	NA	NA	NA	NA	NA	NA	NA	NA	NA	71	NA	NA	NA
prad_p1000	MO_1130	MO_1130	prad_p1000:MO_1130	prad_p1000:MO_1130	0	NA	Prostate Cancer	Prostate Adenocarcinoma	0.1036	NA	NA	Bone	NA	NA	NA	22	PRAD	NA	NA	1	NA	Metastasis	Male	Matched	0.766667	NA	NA	NA	NA	NA	NA	NA	NA	NA	NA	NA	NA	NA	NA	NA	NA	NA	NA	NA	NA	56	NA	NA	NA
prad_p1000	MO_1132	MO_1132	prad_p1000:MO_1132	prad_p1000:MO_1132	0	NA	Prostate Cancer	Prostate Adenocarcinoma	0.0335	NA	NA	Bone	NA	NA	NA	82	PRAD	NA	NA	1	NA	Metastasis	Male	Matched	2.73333	NA	NA	NA	NA	NA	NA	NA	NA	NA	NA	NA	NA	NA	NA	NA	NA	NA	NA	NA	NA	61	NA	NA	NA
prad_p1000	MO_1139	MO_1139	prad_p1000:MO_1139	prad_p1000:MO_1139	0	NA	Prostate Cancer	Prostate Adenocarcinoma	0.0486	NA	NA	Bone	NA	NA	NA	47	PRAD	NA	NA	1	NA	Metastasis	Male	Matched	1.56667	NA	NA	NA	NA	NA	NA	NA	NA	NA	NA	NA	NA	NA	NA	NA	NA	NA	NA	NA	NA	61	NA	NA	NA
prad_p1000	MO_1161	MO_1161	prad_p1000:MO_1161	prad_p1000:MO_1161	0	NA	Prostate Cancer	Prostate Adenocarcinoma	0.482	NA	NA	Liver	NA	NA	NA	43	PRAD	NA	NA	1	NA	Metastasis	Male	Matched	1.43333	NA	NA	NA	NA	NA	NA	NA	NA	NA	NA	NA	NA	NA	NA	NA	NA	NA	NA	NA	NA	65	NA	NA	NA
prad_p1000	MO_1162	MO_1162	prad_p1000:MO_1162	prad_p1000:MO_1162	0	NA	Prostate Cancer	Prostate Adenocarcinoma	0.3536	NA	NA	Peritoneal nodule	NA	NA	NA	67	PRAD	NA	NA	1	NA	Metastasis	Male	Matched	2.23333	NA	NA	NA	NA	NA	NA	NA	NA	NA	NA	NA	NA	NA	NA	NA	NA	NA	NA	NA	NA	50	NA	NA	NA
prad_p1000	MO_1176	MO_1176	prad_p1000:MO_1176	prad_p1000:MO_1176	0	NA	Prostate Cancer	Prostate Adenocarcinoma	0.2419	NA	NA	Lymph node	NA	NA	NA	76	PRAD	NA	NA	1	NA	Metastasis	Male	Matched	2.53333	NA	NA	NA	NA	NA	NA	NA	NA	NA	NA	NA	NA	NA	NA	NA	NA	NA	NA	NA	NA	56	NA	NA	NA
prad_p1000	MO_1179	MO_1179	prad_p1000:MO_1179	prad_p1000:MO_1179	0	NA	Prostate Cancer	Prostate Adenocarcinoma	0.1988	NA	NA	Bone	NA	NA	NA	61	PRAD	NA	NA	1	NA	Metastasis	Male	Matched	2.03333	NA	NA	NA	NA	NA	NA	NA	NA	NA	NA	NA	NA	NA	NA	NA	NA	NA	NA	NA	NA	75	NA	NA	NA
prad_p1000	MO_1184	MO_1184	prad_p1000:MO_1184	prad_p1000:MO_1184	0	NA	Prostate Cancer	Prostate Adenocarcinoma	0.3144	NA	NA	Liver	NA	NA	NA	104	PRAD	NA	NA	1	NA	Metastasis	Male	Matched	3.5	NA	NA	NA	NA	NA	NA	NA	NA	NA	NA	NA	NA	NA	NA	NA	NA	NA	NA	NA	NA	71	NA	NA	NA
prad_p1000	MO_1192	MO_1192	prad_p1000:MO_1192	prad_p1000:MO_1192	0	NA	Prostate Cancer	Prostate Adenocarcinoma	0.2898	NA	NA	Lymph node	NA	NA	NA	36	PRAD	NA	NA	1	NA	Metastasis	Male	Matched	1.2	NA	NA	NA	NA	NA	NA	NA	NA	NA	NA	NA	NA	NA	NA	NA	NA	NA	NA	NA	NA	62	NA	NA	NA
prad_p1000	MO_1202	MO_1202	prad_p1000:MO_1202	prad_p1000:MO_1202	0	NA	Prostate Cancer	Prostate Adenocarcinoma	0.5727	NA	NA	Liver	NA	NA	NA	53	PRAD	NA	NA	1	NA	Metastasis	Male	Matched	1.76667	NA	NA	NA	NA	NA	NA	NA	NA	NA	NA	NA	NA	NA	NA	NA	NA	NA	NA	NA	NA	70	NA	NA	NA
prad_p1000	MO_1215	MO_1215	prad_p1000:MO_1215	prad_p1000:MO_1215	0	NA	Prostate Cancer	Prostate Adenocarcinoma	0.6417	NA	NA	Perirectal	NA	NA	NA	135	PRAD	NA	NA	1	NA	Metastasis	Male	Matched	4.53333	NA	NA	NA	NA	NA	NA	NA	NA	NA	NA	NA	NA	NA	NA	NA	NA	NA	NA	NA	NA	65	NA	NA	NA
prad_p1000	MO_1219	MO_1219	prad_p1000:MO_1219	prad_p1000:MO_1219	0	NA	Prostate Cancer	Prostate Adenocarcinoma	0.1401	NA	NA	Bone	NA	NA	NA	32	PRAD	NA	NA	1	NA	Metastasis	Male	Matched	1.06667	NA	NA	NA	NA	NA	NA	NA	NA	NA	NA	NA	NA	NA	NA	NA	NA	NA	NA	NA	NA	68	NA	NA	NA
prad_p1000	MO_1232	MO_1232	prad_p1000:MO_1232	prad_p1000:MO_1232	0	NA	Prostate Cancer	Prostate Adenocarcinoma	0.6088	NA	NA	Chest Wall	NA	NA	NA	192	PRAD	NA	NA	1	NA	Metastasis	Male	Matched	6.4	NA	NA	NA	NA	NA	NA	NA	NA	NA	NA	NA	NA	NA	NA	NA	NA	NA	NA	NA	NA	65	NA	NA	NA
prad_p1000	MO_1241	MO_1241	prad_p1000:MO_1241	prad_p1000:MO_1241	0	NA	Prostate Cancer	Prostate Adenocarcinoma	0.5627	NA	NA	Liver	NA	NA	NA	51	PRAD	NA	NA	1	NA	Metastasis	Male	Matched	1.7	NA	NA	NA	NA	NA	NA	NA	NA	NA	NA	NA	NA	NA	NA	NA	NA	NA	NA	NA	NA	75	NA	NA	NA
prad_p1000	MO_1244	MO_1244	prad_p1000:MO_1244	prad_p1000:MO_1244	0	NA	Prostate Cancer	Prostate Adenocarcinoma	0.4516	NA	NA	Liver	NA	NA	NA	41	PRAD	NA	NA	1	NA	Metastasis	Male	Matched	1.36667	NA	NA	NA	NA	NA	NA	NA	NA	NA	NA	NA	NA	NA	NA	NA	NA	NA	NA	NA	NA	58	NA	NA	NA
prad_p1000	MO_1249	MO_1249	prad_p1000:MO_1249	prad_p1000:MO_1249	0	NA	Prostate Cancer	Prostate Adenocarcinoma	0.3575	NA	NA	Lymph node	NA	NA	NA	81	PRAD	NA	NA	1	NA	Metastasis	Male	Matched	2.7	NA	NA	NA	NA	NA	NA	NA	NA	NA	NA	NA	NA	NA	NA	NA	NA	NA	NA	NA	NA	70	NA	NA	NA
prad_p1000	MO_1262	MO_1262	prad_p1000:MO_1262	prad_p1000:MO_1262	0	NA	Prostate Cancer	Prostate Adenocarcinoma	0.0915	NA	NA	Lymph node	NA	NA	NA	68	PRAD	NA	NA	1	NA	Metastasis	Male	Matched	2.26667	NA	NA	NA	NA	NA	NA	NA	NA	NA	NA	NA	NA	NA	NA	NA	NA	NA	NA	NA	NA	53	NA	NA	NA
prad_p1000	MO_1277	MO_1277	prad_p1000:MO_1277	prad_p1000:MO_1277	0	NA	Prostate Cancer	Prostate Adenocarcinoma	0.3418	NA	NA	Bone	NA	NA	NA	50	PRAD	NA	NA	1	NA	Metastasis	Male	Matched	1.66667	NA	NA	NA	NA	NA	NA	NA	NA	NA	NA	NA	NA	NA	NA	NA	NA	NA	NA	NA	NA	54	NA	NA	NA
prad_p1000	MO_1316	MO_1316	prad_p1000:MO_1316	prad_p1000:MO_1316	0	NA	Prostate Cancer	Prostate Adenocarcinoma	0.2545	NA	NA	Lymph node	NA	NA	NA	60	PRAD	NA	NA	1	NA	Metastasis	Male	Matched	2	NA	NA	NA	NA	NA	NA	NA	NA	NA	NA	NA	NA	NA	NA	NA	NA	NA	NA	NA	NA	70	NA	NA	NA
prad_p1000	MO_1337	MO_1337	prad_p1000:MO_1337	prad_p1000:MO_1337	0	NA	Prostate Cancer	Prostate Adenocarcinoma	0.2854	NA	NA	Liver	NA	NA	NA	42	PRAD	NA	NA	1	NA	Metastasis	Male	Matched	1.4	NA	NA	NA	NA	NA	NA	NA	NA	NA	NA	NA	NA	NA	NA	NA	NA	NA	NA	NA	NA	62	NA	NA	NA
prad_p1000	MO_1339	MO_1339	prad_p1000:MO_1339	prad_p1000:MO_1339	0	NA	Prostate Cancer	Prostate Adenocarcinoma	0.6822	NA	NA	Lymph node	NA	NA	NA	55	PRAD	NA	NA	1	NA	Metastasis	Male	Matched	1.83333	NA	NA	NA	NA	NA	NA	NA	NA	NA	NA	NA	NA	NA	NA	NA	NA	NA	NA	NA	NA	78	NA	NA	NA
prad_p1000	MO_1410	MO_1410	prad_p1000:MO_1410	prad_p1000:MO_1410	0	NA	Prostate Cancer	Prostate Adenocarcinoma	0.4958	NA	NA	Liver	NA	NA	NA	108	PRAD	NA	NA	1	NA	Metastasis	Male	Matched	3.6	NA	NA	NA	NA	NA	NA	NA	NA	NA	NA	NA	NA	NA	NA	NA	NA	NA	NA	NA	NA	66	NA	NA	NA
prad_p1000	MO_1421	MO_1421	prad_p1000:MO_1421	prad_p1000:MO_1421	0	NA	Prostate Cancer	Prostate Adenocarcinoma	0.2751	NA	NA	Bone	NA	NA	NA	95	PRAD	NA	NA	1	NA	Metastasis	Male	Matched	3.16667	NA	NA	NA	NA	NA	NA	NA	NA	NA	NA	NA	NA	NA	NA	NA	NA	NA	NA	NA	NA	56	NA	NA	NA
prad_p1000	MO_1447	MO_1447	prad_p1000:MO_1447	prad_p1000:MO_1447	0	NA	Prostate Cancer	Prostate Adenocarcinoma	0.4952	NA	NA	Lymph Node	NA	NA	NA	130	PRAD	NA	NA	1	NA	Metastasis	Male	Matched	4.33333	NA	NA	NA	NA	NA	NA	NA	NA	NA	NA	NA	NA	NA	NA	NA	NA	NA	NA	NA	NA	58	NA	NA	NA
prad_p1000	MO_1460	MO_1460	prad_p1000:MO_1460	prad_p1000:MO_1460	0	NA	Prostate Cancer	Prostate Adenocarcinoma	0.416	NA	NA	Liver	NA	NA	NA	104	PRAD	NA	NA	1	NA	Metastasis	Male	Matched	3.46667	NA	NA	NA	NA	NA	NA	NA	NA	NA	NA	NA	NA	NA	NA	NA	NA	NA	NA	NA	NA	64	NA	NA	NA
prad_p1000	MO_1473	MO_1473	prad_p1000:MO_1473	prad_p1000:MO_1473	0	NA	Prostate Cancer	Prostate Adenocarcinoma	0.5063	NA	NA	Bone	NA	NA	NA	150	PRAD	NA	NA	1	NA	Metastasis	Male	Matched	5	NA	NA	NA	NA	NA	NA	NA	NA	NA	NA	NA	NA	NA	NA	NA	NA	NA	NA	NA	NA	76	NA	NA	NA
prad_p1000	PM10	PM10	prad_p1000:PM10	prad_p1000:PM10	0	NA	Prostate Cancer	Prostate Adenocarcinoma	0.0407	NA	NA	NA	NA	NA	NA	931	PRAD	NA	NA	1	NA	Metastasis	Male	Matched	31.1	NA	NA	NA	NA	NA	NA	NA	NA	NA	NA	NA	NA	NA	NA	NA	NA	NA	NA	NA	NA	85	NA	NA	NA
prad_p1000	PM119	PM119	prad_p1000:PM119	prad_p1000:PM119	0	NA	Prostate Cancer	Prostate Adenocarcinoma	0.6254	NA	NA	NA	NA	NA	NA	37	PRAD	NA	NA	1	NA	Metastasis	Male	Matched	1.26667	NA	NA	NA	NA	NA	NA	NA	NA	NA	NA	NA	NA	NA	NA	NA	NA	NA	NA	NA	NA	66	NA	NA	NA
prad_p1000	PM121	PM121	prad_p1000:PM121	prad_p1000:PM121	0	NA	Prostate Cancer	Prostate Adenocarcinoma	0.5221	NA	NA	NA	NA	NA	NA	38	PRAD	NA	NA	1	NA	Metastasis	Male	Matched	1.26667	NA	NA	NA	NA	NA	NA	NA	NA	NA	NA	NA	NA	NA	NA	NA	NA	NA	NA	NA	NA	68	NA	NA	NA
prad_p1000	PM124	PM124	prad_p1000:PM124	prad_p1000:PM124	0	NA	Prostate Cancer	Prostate Adenocarcinoma	0.497	NA	NA	NA	NA	NA	NA	53	PRAD	NA	NA	1	NA	Metastasis	Male	Matched	1.76667	NA	NA	NA	NA	NA	NA	NA	NA	NA	NA	NA	NA	NA	NA	NA	NA	NA	NA	NA	NA	95	NA	NA	NA
prad_p1000	PM139	PM139	prad_p1000:PM139	prad_p1000:PM139	0	NA	Prostate Cancer	Prostate Adenocarcinoma	0.3832	NA	NA	NA	NA	NA	NA	57	PRAD	NA	NA	1	NA	Metastasis	Male	Matched	1.9	NA	NA	NA	NA	NA	NA	NA	NA	NA	NA	NA	NA	NA	NA	NA	NA	NA	NA	NA	NA	77	NA	NA	NA
prad_p1000	PM14	PM14	prad_p1000:PM14	prad_p1000:PM14	0	NA	Prostate Cancer	Prostate Adenocarcinoma	0.4174	NA	NA	NA	NA	NA	NA	45	PRAD	NA	NA	1	NA	Metastasis	Male	Matched	1.5	NA	NA	NA	NA	NA	NA	NA	NA	NA	NA	NA	NA	NA	NA	NA	NA	NA	NA	NA	NA	64	NA	NA	NA
prad_p1000	PM15	PM15	prad_p1000:PM15	prad_p1000:PM15	0	NA	Prostate Cancer	Prostate Adenocarcinoma	0.7108	NA	NA	NA	NA	NA	NA	36	PRAD	NA	NA	1	NA	Metastasis	Male	Matched	1.2	NA	NA	NA	NA	NA	NA	NA	NA	NA	NA	NA	NA	NA	NA	NA	NA	NA	NA	NA	NA	74	NA	NA	NA
prad_p1000	PM154	PM154	prad_p1000:PM154	prad_p1000:PM154	0	NA	Prostate Cancer	Prostate Adenocarcinoma	0.598	NA	NA	NA	NA	NA	NA	47	PRAD	NA	NA	1	NA	Metastasis	Male	Matched	1.56667	NA	NA	NA	NA	NA	NA	NA	NA	NA	NA	NA	NA	NA	NA	NA	NA	NA	NA	NA	NA	79	NA	NA	NA
prad_p1000	PM155	PM155	prad_p1000:PM155	prad_p1000:PM155	0	NA	Prostate Cancer	Prostate Adenocarcinoma	0.2728	NA	NA	NA	NA	NA	NA	87	PRAD	NA	NA	1	NA	Metastasis	Male	Matched	2.9	NA	NA	NA	NA	NA	NA	NA	NA	NA	NA	NA	NA	NA	NA	NA	NA	NA	NA	NA	NA	87	NA	NA	NA
prad_p1000	PM156	PM156	prad_p1000:PM156	prad_p1000:PM156	0	NA	Prostate Cancer	Prostate Adenocarcinoma	0.4098	NA	NA	NA	NA	NA	NA	48	PRAD	NA	NA	1	NA	Metastasis	Male	Matched	1.6	NA	NA	NA	NA	NA	NA	NA	NA	NA	NA	NA	NA	NA	NA	NA	NA	NA	NA	NA	NA	63	NA	NA	NA
prad_p1000	PM158	PM158	prad_p1000:PM158	prad_p1000:PM158	0	NA	Prostate Cancer	Prostate Adenocarcinoma	0.4205	NA	NA	NA	NA	NA	NA	24	PRAD	NA	NA	1	NA	Metastasis	Male	Matched	0.8	NA	NA	NA	NA	NA	NA	NA	NA	NA	NA	NA	NA	NA	NA	NA	NA	NA	NA	NA	NA	65	NA	NA	NA
prad_p1000	PM159	PM159	prad_p1000:PM159	prad_p1000:PM159	0	NA	Prostate Cancer	Prostate Adenocarcinoma	0.4481	NA	NA	NA	NA	NA	NA	80	PRAD	NA	NA	1	NA	Metastasis	Male	Matched	2.66667	NA	NA	NA	NA	NA	NA	NA	NA	NA	NA	NA	NA	NA	NA	NA	NA	NA	NA	NA	NA	64	NA	NA	NA
prad_p1000	PM161	PM161	prad_p1000:PM161	prad_p1000:PM161	0	NA	Prostate Cancer	Prostate Adenocarcinoma	0.6195	NA	NA	NA	NA	NA	NA	55	PRAD	NA	NA	1	NA	Metastasis	Male	Matched	1.83333	NA	NA	NA	NA	NA	NA	NA	NA	NA	NA	NA	NA	NA	NA	NA	NA	NA	NA	NA	NA	65	NA	NA	NA
prad_p1000	PM163	PM163	prad_p1000:PM163	prad_p1000:PM163	0	NA	Prostate Cancer	Prostate Adenocarcinoma	0.5739	NA	NA	NA	NA	NA	NA	43	PRAD	NA	NA	1	NA	Metastasis	Male	Matched	1.43333	NA	NA	NA	NA	NA	NA	NA	NA	NA	NA	NA	NA	NA	NA	NA	NA	NA	NA	NA	NA	67	NA	NA	NA
prad_p1000	PM170	PM170	prad_p1000:PM170	prad_p1000:PM170	0	NA	Prostate Cancer	Prostate Adenocarcinoma	0.3328	NA	NA	NA	NA	NA	NA	33	PRAD	NA	NA	1	NA	Metastasis	Male	Matched	1.1	NA	NA	NA	NA	NA	NA	NA	NA	NA	NA	NA	NA	NA	NA	NA	NA	NA	NA	NA	NA	70	NA	NA	NA
prad_p1000	PM172	PM172	prad_p1000:PM172	prad_p1000:PM172	0	NA	Prostate Cancer	Prostate Adenocarcinoma	0.619	NA	NA	NA	NA	NA	NA	38	PRAD	NA	NA	1	NA	Metastasis	Male	Matched	1.26667	NA	NA	NA	NA	NA	NA	NA	NA	NA	NA	NA	NA	NA	NA	NA	NA	NA	NA	NA	NA	68	NA	NA	NA
prad_p1000	PM189	PM189	prad_p1000:PM189	prad_p1000:PM189	0	NA	Prostate Cancer	Prostate Adenocarcinoma	0.4429	NA	NA	NA	NA	NA	NA	49	PRAD	NA	NA	1	NA	Metastasis	Male	Matched	1.63333	NA	NA	NA	NA	NA	NA	NA	NA	NA	NA	NA	NA	NA	NA	NA	NA	NA	NA	NA	NA	85	NA	NA	NA
prad_p1000	PM2	PM2	prad_p1000:PM2	prad_p1000:PM2	0	NA	Prostate Cancer	Prostate Adenocarcinoma	0.5729	NA	NA	NA	NA	NA	NA	49	PRAD	NA	NA	1	NA	Metastasis	Male	Matched	1.63333	NA	NA	NA	NA	NA	NA	NA	NA	NA	NA	NA	NA	NA	NA	NA	NA	NA	NA	NA	NA	73	NA	NA	NA
prad_p1000	PM6-Halo-TM	PM6-Halo-TM	prad_p1000:PM6-Halo-TM	prad_p1000:PM6-Halo-TM	0	NA	Prostate Cancer	Prostate Adenocarcinoma	0.7797	NA	NA	NA	NA	NA	NA	58	PRAD	NA	NA	1	NA	Metastasis	Male	Matched	1.93333	NA	NA	NA	NA	NA	NA	NA	NA	NA	NA	NA	NA	NA	NA	NA	NA	NA	NA	NA	NA	NA	NA	NA	NA
prad_p1000	PM78	PM78	prad_p1000:PM78	prad_p1000:PM78	0	NA	Prostate Cancer	Prostate Adenocarcinoma	0.2731	NA	NA	NA	NA	NA	NA	61	PRAD	NA	NA	1	NA	Metastasis	Male	Matched	2.06667	NA	NA	NA	NA	NA	NA	NA	NA	NA	NA	NA	NA	NA	NA	NA	NA	NA	NA	NA	NA	78	NA	NA	NA
prad_p1000	PM9	PM9	prad_p1000:PM9	prad_p1000:PM9	0	NA	Prostate Cancer	Prostate Adenocarcinoma	0.2015	NA	NA	NA	NA	NA	NA	36	PRAD	NA	NA	1	NA	Metastasis	Male	Matched	1.2	NA	NA	NA	NA	NA	NA	NA	NA	NA	NA	NA	NA	NA	NA	NA	NA	NA	NA	NA	NA	64	NA	NA	NA
prad_p1000	PM90	PM90	prad_p1000:PM90	prad_p1000:PM90	0	NA	Prostate Cancer	Prostate Adenocarcinoma	0.2447	NA	NA	NA	NA	NA	NA	25	PRAD	NA	NA	1	NA	Metastasis	Male	Matched	0.833333	NA	NA	NA	NA	NA	NA	NA	NA	NA	NA	NA	NA	NA	NA	NA	NA	NA	NA	NA	NA	62	NA	NA	NA
prad_p1000	PRAD-01115245-SM-6WZF3	PRAD-01115245-SM-6WZF3	prad_p1000:PRAD-01115245-SM-6WZF3	prad_p1000:PRAD-01115245-SM-6WZF3	0	NA	Prostate Cancer	Prostate Adenocarcinoma	0.0879	NA	NA	Bone	NA	NA	NA	49	PRAD	NA	NA	1	NA	Metastasis	Male	Matched	1.63333	NA	NA	NA	NA	NA	NA	NA	NA	NA	NA	NA	NA	NA	NA	NA	NA	NA	NA	NA	NA	60	NA	NA	NA
prad_p1000	PRAD-01115249-SM-6VZ7K	PRAD-01115249-SM-6VZ7K	prad_p1000:PRAD-01115249-SM-6VZ7K	prad_p1000:PRAD-01115249-SM-6VZ7K	0	NA	Prostate Cancer	Prostate Adenocarcinoma	0.5187	NA	NA	Bone	NA	NA	NA	74	PRAD	NA	NA	1	NA	Metastasis	Male	Matched	2.46667	NA	NA	NA	NA	NA	NA	NA	NA	NA	NA	NA	NA	NA	NA	NA	NA	NA	NA	NA	NA	75	NA	NA	NA
prad_p1000	PRAD-01115257-SM-6WZF8	PRAD-01115257-SM-6WZF8	prad_p1000:PRAD-01115257-SM-6WZF8	prad_p1000:PRAD-01115257-SM-6WZF8	0	NA	Prostate Cancer	Prostate Adenocarcinoma	0.6083	NA	NA	Bone	NA	NA	NA	80	PRAD	NA	NA	1	NA	Metastasis	Male	Matched	2.66667	NA	NA	NA	NA	NA	NA	NA	NA	NA	NA	NA	NA	NA	NA	NA	NA	NA	NA	NA	NA	63	NA	NA	NA
prad_p1000	PRAD-01115263-SM-6WZF9	PRAD-01115263-SM-6WZF9	prad_p1000:PRAD-01115263-SM-6WZF9	prad_p1000:PRAD-01115263-SM-6WZF9	0	NA	Prostate Cancer	Prostate Adenocarcinoma	0.1862	NA	NA	Bone	NA	NA	NA	30	PRAD	NA	NA	1	NA	Metastasis	Male	Matched	1	NA	NA	NA	NA	NA	NA	NA	NA	NA	NA	NA	NA	NA	NA	NA	NA	NA	NA	NA	NA	75	NA	NA	NA
prad_p1000	PRAD-01115264-SM-6WZFA	PRAD-01115264-SM-6WZFA	prad_p1000:PRAD-01115264-SM-6WZFA	prad_p1000:PRAD-01115264-SM-6WZFA	0	NA	Prostate Cancer	Prostate Adenocarcinoma	0.4304	NA	NA	Bone	NA	NA	NA	44	PRAD	NA	NA	1	NA	Metastasis	Male	Matched	1.46667	NA	NA	NA	NA	NA	NA	NA	NA	NA	NA	NA	NA	NA	NA	NA	NA	NA	NA	NA	NA	70	NA	NA	NA
prad_p1000	PRAD-01115265-SM-6WZFB	PRAD-01115265-SM-6WZFB	prad_p1000:PRAD-01115265-SM-6WZFB	prad_p1000:PRAD-01115265-SM-6WZFB	0	NA	Prostate Cancer	Prostate Adenocarcinoma	0.0924	NA	NA	Bone	NA	NA	NA	34	PRAD	NA	NA	1	NA	Metastasis	Male	Matched	1.13333	NA	NA	NA	NA	NA	NA	NA	NA	NA	NA	NA	NA	NA	NA	NA	NA	NA	NA	NA	NA	78	NA	NA	NA
prad_p1000	PRAD-01115284-SM-6WZF6	PRAD-01115284-SM-6WZF6	prad_p1000:PRAD-01115284-SM-6WZF6	prad_p1000:PRAD-01115284-SM-6WZF6	0	NA	Prostate Cancer	Prostate Adenocarcinoma	0.3359	NA	NA	Bone	NA	NA	NA	45	PRAD	NA	NA	1	NA	Metastasis	Male	Matched	1.5	NA	NA	NA	NA	NA	NA	NA	NA	NA	NA	NA	NA	NA	NA	NA	NA	NA	NA	NA	NA	73	NA	NA	NA
prad_p1000	PRAD-01115343-SM-6VZ7N	PRAD-01115343-SM-6VZ7N	prad_p1000:PRAD-01115343-SM-6VZ7N	prad_p1000:PRAD-01115343-SM-6VZ7N	0	NA	Prostate Cancer	Prostate Adenocarcinoma	0.2262	NA	NA	Bone	NA	NA	NA	45	PRAD	NA	NA	1	NA	Metastasis	Male	Matched	1.5	NA	NA	NA	NA	NA	NA	NA	NA	NA	NA	NA	NA	NA	NA	NA	NA	NA	NA	NA	NA	73	NA	NA	NA
prad_p1000	PRAD-01115349-SM-6VZ7M	PRAD-01115349-SM-6VZ7M	prad_p1000:PRAD-01115349-SM-6VZ7M	prad_p1000:PRAD-01115349-SM-6VZ7M	0	NA	Prostate Cancer	Prostate Adenocarcinoma	0.0026	NA	NA	Bone	NA	NA	NA	5	PRAD	NA	NA	1	NA	Metastasis	Male	Matched	0.166667	NA	NA	NA	NA	NA	NA	NA	NA	NA	NA	NA	NA	NA	NA	NA	NA	NA	NA	NA	NA	69	NA	NA	NA
prad_p1000	PRAD-06115124-SM-7LGU1	PRAD-06115124-SM-7LGU1	prad_p1000:PRAD-06115124-SM-7LGU1	prad_p1000:PRAD-06115124-SM-7LGU1	0	NA	Prostate Cancer	Prostate Adenocarcinoma	0.0108	NA	NA	NA	NA	NA	NA	25	PRAD	NA	NA	1	NA	Metastasis	Male	Matched	0.833333	NA	NA	NA	NA	NA	NA	NA	NA	NA	NA	NA	NA	NA	NA	NA	NA	NA	NA	NA	NA	72	NA	NA	NA
prad_p1000	PRAD-6115381.0-SM-7LGU3	PRAD-6115381.0-SM-7LGU3	prad_p1000:PRAD-6115381.0-SM-7LGU3	prad_p1000:PRAD-6115381.0-SM-7LGU3	0	NA	Prostate Cancer	Prostate Adenocarcinoma	0.5458	NA	NA	NA	NA	NA	NA	41	PRAD	NA	NA	1	NA	Metastasis	Male	Matched	1.36667	NA	NA	NA	NA	NA	NA	NA	NA	NA	NA	NA	NA	NA	NA	NA	NA	NA	NA	NA	NA	60	NA	NA	NA
prad_p1000	PRAD-6115383.0-SM-7LGU6	PRAD-6115383.0-SM-7LGU6	prad_p1000:PRAD-6115383.0-SM-7LGU6	prad_p1000:PRAD-6115383.0-SM-7LGU6	0	NA	Prostate Cancer	Prostate Adenocarcinoma	0.6458	NA	NA	NA	NA	NA	NA	48	PRAD	NA	NA	1	NA	Metastasis	Male	Matched	1.6	NA	NA	NA	NA	NA	NA	NA	NA	NA	NA	NA	NA	NA	NA	NA	NA	NA	NA	NA	NA	67	NA	NA	NA
prad_p1000	PRAD-6115385.0-SM-7LGU7	PRAD-6115385.0-SM-7LGU7	prad_p1000:PRAD-6115385.0-SM-7LGU7	prad_p1000:PRAD-6115385.0-SM-7LGU7	0	NA	Prostate Cancer	Prostate Adenocarcinoma	0.5255	NA	NA	NA	NA	NA	NA	119	PRAD	NA	NA	1	NA	Metastasis	Male	Matched	3.96667	NA	NA	NA	NA	NA	NA	NA	NA	NA	NA	NA	NA	NA	NA	NA	NA	NA	NA	NA	NA	62	NA	NA	NA
prad_p1000	PRAD-6115386.0-SM-7LGU8	PRAD-6115386.0-SM-7LGU8	prad_p1000:PRAD-6115386.0-SM-7LGU8	prad_p1000:PRAD-6115386.0-SM-7LGU8	0	NA	Prostate Cancer	Prostate Adenocarcinoma	0.6581	NA	NA	NA	NA	NA	NA	67	PRAD	NA	NA	1	NA	Metastasis	Male	Matched	2.23333	NA	NA	NA	NA	NA	NA	NA	NA	NA	NA	NA	NA	NA	NA	NA	NA	NA	NA	NA	NA	65	NA	NA	NA
prad_p1000	PRAD-6115387.0-SM-7LGU9	PRAD-6115387.0-SM-7LGU9	prad_p1000:PRAD-6115387.0-SM-7LGU9	prad_p1000:PRAD-6115387.0-SM-7LGU9	0	NA	Prostate Cancer	Prostate Adenocarcinoma	0.2427	NA	NA	NA	NA	NA	NA	68	PRAD	NA	NA	1	NA	Metastasis	Male	Matched	2.26667	NA	NA	NA	NA	NA	NA	NA	NA	NA	NA	NA	NA	NA	NA	NA	NA	NA	NA	NA	NA	83	NA	NA	NA
prad_p1000	PRAD-6115388.0-SM-7LGUA	PRAD-6115388.0-SM-7LGUA	prad_p1000:PRAD-6115388.0-SM-7LGUA	prad_p1000:PRAD-6115388.0-SM-7LGUA	0	NA	Prostate Cancer	Prostate Adenocarcinoma	0.5337	NA	NA	NA	NA	NA	NA	65	PRAD	NA	NA	1	NA	Metastasis	Male	Matched	2.16667	NA	NA	NA	NA	NA	NA	NA	NA	NA	NA	NA	NA	NA	NA	NA	NA	NA	NA	NA	NA	77	NA	NA	NA
prad_p1000	PRAD-6115389.0-SM-7LGUB	PRAD-6115389.0-SM-7LGUB	prad_p1000:PRAD-6115389.0-SM-7LGUB	prad_p1000:PRAD-6115389.0-SM-7LGUB	0	NA	Prostate Cancer	Prostate Adenocarcinoma	0.5434	NA	NA	NA	NA	NA	NA	65	PRAD	NA	NA	1	NA	Metastasis	Male	Matched	2.16667	NA	NA	NA	NA	NA	NA	NA	NA	NA	NA	NA	NA	NA	NA	NA	NA	NA	NA	NA	NA	81	NA	NA	NA
prad_p1000	PRAD-6115390.0-SM-7LGUC	PRAD-6115390.0-SM-7LGUC	prad_p1000:PRAD-6115390.0-SM-7LGUC	prad_p1000:PRAD-6115390.0-SM-7LGUC	0	NA	Prostate Cancer	Prostate Adenocarcinoma	0.4057	NA	NA	NA	NA	NA	NA	114	PRAD	NA	NA	1	NA	Metastasis	Male	Matched	3.8	NA	NA	NA	NA	NA	NA	NA	NA	NA	NA	NA	NA	NA	NA	NA	NA	NA	NA	NA	NA	68	NA	NA	NA
prad_p1000	PRAD-6115391.0-SM-7LGUD	PRAD-6115391.0-SM-7LGUD	prad_p1000:PRAD-6115391.0-SM-7LGUD	prad_p1000:PRAD-6115391.0-SM-7LGUD	0	NA	Prostate Cancer	Prostate Adenocarcinoma	0.2326	NA	NA	NA	NA	NA	NA	116	PRAD	NA	NA	1	NA	Metastasis	Male	Matched	3.86667	NA	NA	NA	NA	NA	NA	NA	NA	NA	NA	NA	NA	NA	NA	NA	NA	NA	NA	NA	NA	69	NA	NA	NA
prad_p1000	PRAD-6115392.0-SM-7LGUE	PRAD-6115392.0-SM-7LGUE	prad_p1000:PRAD-6115392.0-SM-7LGUE	prad_p1000:PRAD-6115392.0-SM-7LGUE	0	NA	Prostate Cancer	Prostate Adenocarcinoma	0.2203	NA	NA	NA	NA	NA	NA	43	PRAD	NA	NA	1	NA	Metastasis	Male	Matched	1.43333	NA	NA	NA	NA	NA	NA	NA	NA	NA	NA	NA	NA	NA	NA	NA	NA	NA	NA	NA	NA	64	NA	NA	NA
prad_p1000	PRAD-6115393.0-SM-7LGUF	PRAD-6115393.0-SM-7LGUF	prad_p1000:PRAD-6115393.0-SM-7LGUF	prad_p1000:PRAD-6115393.0-SM-7LGUF	0	NA	Prostate Cancer	Prostate Adenocarcinoma	0.1646	NA	NA	NA	NA	NA	NA	42	PRAD	NA	NA	1	NA	Metastasis	Male	Matched	1.4	NA	NA	NA	NA	NA	NA	NA	NA	NA	NA	NA	NA	NA	NA	NA	NA	NA	NA	NA	NA	69	NA	NA	NA
prad_p1000	PRAD-6115394.0-SM-7LGUG	PRAD-6115394.0-SM-7LGUG	prad_p1000:PRAD-6115394.0-SM-7LGUG	prad_p1000:PRAD-6115394.0-SM-7LGUG	0	NA	Prostate Cancer	Prostate Adenocarcinoma	0.4677	NA	NA	NA	NA	NA	NA	61	PRAD	NA	NA	1	NA	Metastasis	Male	Matched	2.03333	NA	NA	NA	NA	NA	NA	NA	NA	NA	NA	NA	NA	NA	NA	NA	NA	NA	NA	NA	NA	66	NA	NA	NA
prad_p1000	PRAD-6115395.0-SM-7LGUH	PRAD-6115395.0-SM-7LGUH	prad_p1000:PRAD-6115395.0-SM-7LGUH	prad_p1000:PRAD-6115395.0-SM-7LGUH	0	NA	Prostate Cancer	Prostate Adenocarcinoma	0.2254	NA	NA	NA	NA	NA	NA	42	PRAD	NA	NA	1	NA	Metastasis	Male	Matched	1.4	NA	NA	NA	NA	NA	NA	NA	NA	NA	NA	NA	NA	NA	NA	NA	NA	NA	NA	NA	NA	61	NA	NA	NA
prad_p1000	PRAD-6115396.0-SM-7LGUI	PRAD-6115396.0-SM-7LGUI	prad_p1000:PRAD-6115396.0-SM-7LGUI	prad_p1000:PRAD-6115396.0-SM-7LGUI	0	NA	Prostate Cancer	Prostate Adenocarcinoma	0.2903	NA	NA	NA	NA	NA	NA	63	PRAD	NA	NA	1	NA	Metastasis	Male	Matched	2.1	NA	NA	NA	NA	NA	NA	NA	NA	NA	NA	NA	NA	NA	NA	NA	NA	NA	NA	NA	NA	64	NA	NA	NA
prad_p1000	PRAD-6115397.0-SM-7LGUJ	PRAD-6115397.0-SM-7LGUJ	prad_p1000:PRAD-6115397.0-SM-7LGUJ	prad_p1000:PRAD-6115397.0-SM-7LGUJ	0	NA	Prostate Cancer	Prostate Adenocarcinoma	0.4384	NA	NA	NA	NA	NA	NA	63	PRAD	NA	NA	1	NA	Metastasis	Male	Matched	2.1	NA	NA	NA	NA	NA	NA	NA	NA	NA	NA	NA	NA	NA	NA	NA	NA	NA	NA	NA	NA	84	NA	NA	NA
prad_p1000	PRAD-6115398.0-SM-7LGUK	PRAD-6115398.0-SM-7LGUK	prad_p1000:PRAD-6115398.0-SM-7LGUK	prad_p1000:PRAD-6115398.0-SM-7LGUK	0	NA	Prostate Cancer	Prostate Adenocarcinoma	0.5936	NA	NA	NA	NA	NA	NA	74	PRAD	NA	NA	1	NA	Metastasis	Male	Matched	2.46667	NA	NA	NA	NA	NA	NA	NA	NA	NA	NA	NA	NA	NA	NA	NA	NA	NA	NA	NA	NA	84	NA	NA	NA
prad_p1000	PRAD-6115399.0-SM-7LGUL	PRAD-6115399.0-SM-7LGUL	prad_p1000:PRAD-6115399.0-SM-7LGUL	prad_p1000:PRAD-6115399.0-SM-7LGUL	0	NA	Prostate Cancer	Prostate Adenocarcinoma	0.4744	NA	NA	NA	NA	NA	NA	100	PRAD	NA	NA	1	NA	Metastasis	Male	Matched	3.33333	NA	NA	NA	NA	NA	NA	NA	NA	NA	NA	NA	NA	NA	NA	NA	NA	NA	NA	NA	NA	61	NA	NA	NA
prad_p1000	PRAD-6115400.0-SM-7LGUM	PRAD-6115400.0-SM-7LGUM	prad_p1000:PRAD-6115400.0-SM-7LGUM	prad_p1000:PRAD-6115400.0-SM-7LGUM	0	NA	Prostate Cancer	Prostate Adenocarcinoma	0.2591	NA	NA	NA	NA	NA	NA	33	PRAD	NA	NA	1	NA	Metastasis	Male	Matched	1.1	NA	NA	NA	NA	NA	NA	NA	NA	NA	NA	NA	NA	NA	NA	NA	NA	NA	NA	NA	NA	73	NA	NA	NA
prad_p1000	PRAD-6115401.0-SM-7LGUO	PRAD-6115401.0-SM-7LGUO	prad_p1000:PRAD-6115401.0-SM-7LGUO	prad_p1000:PRAD-6115401.0-SM-7LGUO	0	NA	Prostate Cancer	Prostate Adenocarcinoma	0.0083	NA	NA	NA	NA	NA	NA	486	PRAD	NA	NA	1	NA	Metastasis	Male	Matched	16.2	NA	NA	NA	NA	NA	NA	NA	NA	NA	NA	NA	NA	NA	NA	NA	NA	NA	NA	NA	NA	85	NA	NA	NA
prad_p1000	PRAD-6115402.0-SM-7LGUP	PRAD-6115402.0-SM-7LGUP	prad_p1000:PRAD-6115402.0-SM-7LGUP	prad_p1000:PRAD-6115402.0-SM-7LGUP	0	NA	Prostate Cancer	Prostate Adenocarcinoma	0.214	NA	NA	NA	NA	NA	NA	44	PRAD	NA	NA	1	NA	Metastasis	Male	Matched	1.46667	NA	NA	NA	NA	NA	NA	NA	NA	NA	NA	NA	NA	NA	NA	NA	NA	NA	NA	NA	NA	72	NA	NA	NA
prad_p1000	PRAD-6115403.0-SM-7LGUQ	PRAD-6115403.0-SM-7LGUQ	prad_p1000:PRAD-6115403.0-SM-7LGUQ	prad_p1000:PRAD-6115403.0-SM-7LGUQ	0	NA	Prostate Cancer	Prostate Adenocarcinoma	0.6455	NA	NA	NA	NA	NA	NA	90	PRAD	NA	NA	1	NA	Metastasis	Male	Matched	3	NA	NA	NA	NA	NA	NA	NA	NA	NA	NA	NA	NA	NA	NA	NA	NA	NA	NA	NA	NA	66	NA	NA	NA
prad_p1000	PRAD-A0001-Tumor-SM-3VG6Y	PRAD-A0001-Tumor-SM-3VG6Y	prad_p1000:PRAD-A0001-Tumor-SM-3VG6Y	prad_p1000:PRAD-A0001-Tumor-SM-3VG6Y	0	NA	Prostate Cancer	Prostate Adenocarcinoma	0.6939	NA	NA	NA	NA	NA	NA	59	PRAD	NA	NA	1	NA	Metastasis	Male	Matched	1.96667	NA	NA	NA	NA	NA	NA	NA	NA	NA	NA	NA	NA	NA	NA	NA	NA	NA	NA	NA	NA	NA	NA	NA	NA
prad_p1000	PRAD-DFCI.11-104.15-SM-3S2HH	PRAD-DFCI.11-104.15-SM-3S2HH	prad_p1000:PRAD-DFCI.11-104.15-SM-3S2HH	prad_p1000:PRAD-DFCI.11-104.15-SM-3S2HH	0	NA	Prostate Cancer	Prostate Adenocarcinoma	0.2697	NA	NA	Prostate	NA	NA	NA	19	PRAD	NA	NA	1	NA	Metastasis	Male	Matched	0.633333	NA	NA	NA	NA	NA	NA	NA	NA	NA	NA	NA	NA	NA	NA	NA	NA	NA	NA	NA	NA	NA	NA	NA	NA
prad_p1000	PRAD-STID0000004240-Tumor-SM-S932	PRAD-STID0000004240-Tumor-SM-S932	prad_p1000:PRAD-STID0000004240-Tumor-SM-S932	prad_p1000:PRAD-STID0000004240-Tumor-SM-S932	0	NA	Prostate Cancer	Prostate Adenocarcinoma	0.3782	NA	NA	NA	NA	NA	NA	94	PRAD	NA	NA	1	NA	Metastasis	Male	Matched	3.13333	NA	NA	NA	NA	NA	NA	NA	NA	NA	NA	NA	NA	NA	NA	NA	NA	NA	NA	NA	NA	NA	NA	NA	NA
prad_p1000	PRAD-STID18248-Tumor-SM-1RCU7	PRAD-STID18248-Tumor-SM-1RCU7	prad_p1000:PRAD-STID18248-Tumor-SM-1RCU7	prad_p1000:PRAD-STID18248-Tumor-SM-1RCU7	0	NA	Prostate Cancer	Prostate Adenocarcinoma	0.5904	NA	NA	NA	NA	NA	NA	91	PRAD	NA	NA	1	NA	Metastasis	Male	Matched	3.06667	NA	NA	NA	NA	NA	NA	NA	NA	NA	NA	NA	NA	NA	NA	NA	NA	NA	NA	NA	NA	NA	NA	NA	NA
prad_p1000	PROS01448-1115161-SM-5SGU1	PROS01448-1115161-SM-5SGU1	prad_p1000:PROS01448-1115161-SM-5SGU1	prad_p1000:PROS01448-1115161-SM-5SGU1	0	NA	Prostate Cancer	Prostate Adenocarcinoma	0.3075	NA	NA	Lymph node	NA	NA	NA	66	PRAD	NA	NA	1	NA	Metastasis	Male	Matched	2.2	NA	NA	NA	NA	NA	NA	NA	NA	NA	NA	NA	NA	NA	NA	NA	NA	NA	NA	NA	NA	67	NA	NA	NA
prad_p1000	PROS01448-1115183-SM-5SGU3	PROS01448-1115183-SM-5SGU3	prad_p1000:PROS01448-1115183-SM-5SGU3	prad_p1000:PROS01448-1115183-SM-5SGU3	0	NA	Prostate Cancer	Prostate Adenocarcinoma	0.3784	NA	NA	Bone	NA	NA	NA	34	PRAD	NA	NA	1	NA	Metastasis	Male	Matched	1.13333	NA	NA	NA	NA	NA	NA	NA	NA	NA	NA	NA	NA	NA	NA	NA	NA	NA	NA	NA	NA	63	NA	NA	NA
prad_p1000	PROS01448-1115200-SM-5SGU4	PROS01448-1115200-SM-5SGU4	prad_p1000:PROS01448-1115200-SM-5SGU4	prad_p1000:PROS01448-1115200-SM-5SGU4	0	NA	Prostate Cancer	Prostate Adenocarcinoma	0.0203	NA	NA	Bone	NA	NA	NA	9	PRAD	NA	NA	1	NA	Metastasis	Male	Matched	0.3	NA	NA	NA	NA	NA	NA	NA	NA	NA	NA	NA	NA	NA	NA	NA	NA	NA	NA	NA	NA	NA	NA	NA	NA
prad_p1000	PROS01448-1115202-SM-5SGU5	PROS01448-1115202-SM-5SGU5	prad_p1000:PROS01448-1115202-SM-5SGU5	prad_p1000:PROS01448-1115202-SM-5SGU5	0	NA	Prostate Cancer	Prostate Adenocarcinoma	0.5646	NA	NA	Lymph node	NA	NA	NA	71	PRAD	NA	NA	1	NA	Metastasis	Male	Matched	2.36667	NA	NA	NA	NA	NA	NA	NA	NA	NA	NA	NA	NA	NA	NA	NA	NA	NA	NA	NA	NA	70	NA	NA	NA
prad_p1000	PROS01448-1115244-SM-5SGU6	PROS01448-1115244-SM-5SGU6	prad_p1000:PROS01448-1115244-SM-5SGU6	prad_p1000:PROS01448-1115244-SM-5SGU6	0	NA	Prostate Cancer	Prostate Adenocarcinoma	0.2479	NA	NA	Bone	NA	NA	NA	64	PRAD	NA	NA	1	NA	Metastasis	Male	Matched	2.16667	NA	NA	NA	NA	NA	NA	NA	NA	NA	NA	NA	NA	NA	NA	NA	NA	NA	NA	NA	NA	70	NA	NA	NA
prad_p1000	PROS01448-6115219-SM-67ERS	PROS01448-6115219-SM-67ERS	prad_p1000:PROS01448-6115219-SM-67ERS	prad_p1000:PROS01448-6115219-SM-67ERS	0	NA	Prostate Cancer	Prostate Adenocarcinoma	0.736	NA	NA	NA	NA	NA	NA	71	PRAD	NA	NA	1	NA	Metastasis	Male	Matched	2.36667	NA	NA	NA	NA	NA	NA	NA	NA	NA	NA	NA	NA	NA	NA	NA	NA	NA	NA	NA	NA	68	NA	NA	NA
prad_p1000	PROS01448-6115224-SM-67ERT	PROS01448-6115224-SM-67ERT	prad_p1000:PROS01448-6115224-SM-67ERT	prad_p1000:PROS01448-6115224-SM-67ERT	0	NA	Prostate Cancer	Prostate Adenocarcinoma	0.2189	NA	NA	NA	NA	NA	NA	68	PRAD	NA	NA	1	NA	Metastasis	Male	Matched	2.26667	NA	NA	NA	NA	NA	NA	NA	NA	NA	NA	NA	NA	NA	NA	NA	NA	NA	NA	NA	NA	79	NA	NA	NA
prad_p1000	PROS01448-6115227-SM-67ERU	PROS01448-6115227-SM-67ERU	prad_p1000:PROS01448-6115227-SM-67ERU	prad_p1000:PROS01448-6115227-SM-67ERU	0	NA	Prostate Cancer	Prostate Adenocarcinoma	0.1546	NA	NA	NA	NA	NA	NA	62	PRAD	NA	NA	1	NA	Metastasis	Male	Matched	2.06667	NA	NA	NA	NA	NA	NA	NA	NA	NA	NA	NA	NA	NA	NA	NA	NA	NA	NA	NA	NA	81	NA	NA	NA
prad_p1000	PROS01448-6115233-SM-67ERW	PROS01448-6115233-SM-67ERW	prad_p1000:PROS01448-6115233-SM-67ERW	prad_p1000:PROS01448-6115233-SM-67ERW	0	NA	Prostate Cancer	Prostate Adenocarcinoma	0.4893	NA	NA	NA	NA	NA	NA	69	PRAD	NA	NA	1	NA	Metastasis	Male	Matched	2.3	NA	NA	NA	NA	NA	NA	NA	NA	NA	NA	NA	NA	NA	NA	NA	NA	NA	NA	NA	NA	84	NA	NA	NA
prad_p1000	PROS01448-6115234-SM-67ERX	PROS01448-6115234-SM-67ERX	prad_p1000:PROS01448-6115234-SM-67ERX	prad_p1000:PROS01448-6115234-SM-67ERX	0	NA	Prostate Cancer	Prostate Adenocarcinoma	0.3759	NA	NA	NA	NA	NA	NA	46	PRAD	NA	NA	1	NA	Metastasis	Male	Matched	1.53333	NA	NA	NA	NA	NA	NA	NA	NA	NA	NA	NA	NA	NA	NA	NA	NA	NA	NA	NA	NA	66	NA	NA	NA
prad_p1000	PROS01448-6115235-SM-67ERY	PROS01448-6115235-SM-67ERY	prad_p1000:PROS01448-6115235-SM-67ERY	prad_p1000:PROS01448-6115235-SM-67ERY	0	NA	Prostate Cancer	Prostate Adenocarcinoma	0.3483	NA	NA	NA	NA	NA	NA	138	PRAD	NA	NA	1	NA	Metastasis	Male	Matched	4.6	NA	NA	NA	NA	NA	NA	NA	NA	NA	NA	NA	NA	NA	NA	NA	NA	NA	NA	NA	NA	80	NA	NA	NA
prad_p1000	PROS01448-6115237-SM-67ERZ	PROS01448-6115237-SM-67ERZ	prad_p1000:PROS01448-6115237-SM-67ERZ	prad_p1000:PROS01448-6115237-SM-67ERZ	0	NA	Prostate Cancer	Prostate Adenocarcinoma	0.5859	NA	NA	NA	NA	NA	NA	86	PRAD	NA	NA	1	NA	Metastasis	Male	Matched	2.86667	NA	NA	NA	NA	NA	NA	NA	NA	NA	NA	NA	NA	NA	NA	NA	NA	NA	NA	NA	NA	81	NA	NA	NA
prad_p1000	PROS01448-6115242-SM-67ES1	PROS01448-6115242-SM-67ES1	prad_p1000:PROS01448-6115242-SM-67ES1	prad_p1000:PROS01448-6115242-SM-67ES1	0	NA	Prostate Cancer	Prostate Adenocarcinoma	0.4707	NA	NA	NA	NA	NA	NA	47	PRAD	NA	NA	1	NA	Metastasis	Male	Matched	1.56667	NA	NA	NA	NA	NA	NA	NA	NA	NA	NA	NA	NA	NA	NA	NA	NA	NA	NA	NA	NA	65	NA	NA	NA
prad_p1000	PROS01448-6115247-SM-67ES2	PROS01448-6115247-SM-67ES2	prad_p1000:PROS01448-6115247-SM-67ES2	prad_p1000:PROS01448-6115247-SM-67ES2	0	NA	Prostate Cancer	Prostate Adenocarcinoma	0.1614	NA	NA	NA	NA	NA	NA	34	PRAD	NA	NA	1	NA	Metastasis	Male	Matched	1.13333	NA	NA	NA	NA	NA	NA	NA	NA	NA	NA	NA	NA	NA	NA	NA	NA	NA	NA	NA	NA	61	NA	NA	NA
prad_p1000	PROS01448-6115250-SM-67ES4	PROS01448-6115250-SM-67ES4	prad_p1000:PROS01448-6115250-SM-67ES4	prad_p1000:PROS01448-6115250-SM-67ES4	0	NA	Prostate Cancer	Prostate Adenocarcinoma	0.2554	NA	NA	NA	NA	NA	NA	72	PRAD	NA	NA	1	NA	Metastasis	Male	Matched	2.4	NA	NA	NA	NA	NA	NA	NA	NA	NA	NA	NA	NA	NA	NA	NA	NA	NA	NA	NA	NA	70	NA	NA	NA
prad_p1000	PROS01448-6115251-SM-67ES6	PROS01448-6115251-SM-67ES6	prad_p1000:PROS01448-6115251-SM-67ES6	prad_p1000:PROS01448-6115251-SM-67ES6	0	NA	Prostate Cancer	Prostate Adenocarcinoma	0.354	NA	NA	NA	NA	NA	NA	44	PRAD	NA	NA	1	NA	Metastasis	Male	Matched	1.46667	NA	NA	NA	NA	NA	NA	NA	NA	NA	NA	NA	NA	NA	NA	NA	NA	NA	NA	NA	NA	71	NA	NA	NA
prad_p1000	PROS01448-DFCI.10-448.P05-SM-581SL	PROS01448-DFCI.10-448.P05-SM-581SL	prad_p1000:PROS01448-DFCI.10-448.P05-SM-581SL	prad_p1000:PROS01448-DFCI.10-448.P05-SM-581SL	0	NA	Prostate Cancer	Prostate Adenocarcinoma	0.1952	NA	NA	NA	NA	NA	NA	39	PRAD	NA	NA	1	NA	Metastasis	Male	Matched	1.3	NA	NA	NA	NA	NA	NA	NA	NA	NA	NA	NA	NA	NA	NA	NA	NA	NA	NA	NA	NA	63	NA	NA	NA
prad_p1000	PROS01448-DFCI.10-448.P15-SM-5CQ5D	PROS01448-DFCI.10-448.P15-SM-5CQ5D	prad_p1000:PROS01448-DFCI.10-448.P15-SM-5CQ5D	prad_p1000:PROS01448-DFCI.10-448.P15-SM-5CQ5D	0	NA	Prostate Cancer	Prostate Adenocarcinoma	0.1571	NA	NA	NA	NA	NA	NA	41	PRAD	NA	NA	1	NA	Metastasis	Male	Matched	1.36667	NA	NA	NA	NA	NA	NA	NA	NA	NA	NA	NA	NA	NA	NA	NA	NA	NA	NA	NA	NA	67	NA	NA	NA
prad_p1000	PROS01448-DFCI.10-448.P20-SM-5CQ5F	PROS01448-DFCI.10-448.P20-SM-5CQ5F	prad_p1000:PROS01448-DFCI.10-448.P20-SM-5CQ5F	prad_p1000:PROS01448-DFCI.10-448.P20-SM-5CQ5F	0	NA	Prostate Cancer	Prostate Adenocarcinoma	0.1175	NA	NA	NA	NA	NA	NA	54	PRAD	NA	NA	1	NA	Metastasis	Male	Matched	1.8	NA	NA	NA	NA	NA	NA	NA	NA	NA	NA	NA	NA	NA	NA	NA	NA	NA	NA	NA	NA	72	NA	NA	NA
prad_p1000	PROS01448-DFCI.10-448.P22-SM-5CQ5H	PROS01448-DFCI.10-448.P22-SM-5CQ5H	prad_p1000:PROS01448-DFCI.10-448.P22-SM-5CQ5H	prad_p1000:PROS01448-DFCI.10-448.P22-SM-5CQ5H	0	NA	Prostate Cancer	Prostate Adenocarcinoma	0.0072	NA	NA	NA	NA	NA	NA	41	PRAD	NA	NA	1	NA	Metastasis	Male	Matched	1.36667	NA	NA	NA	NA	NA	NA	NA	NA	NA	NA	NA	NA	NA	NA	NA	NA	NA	NA	NA	NA	NA	NA	NA	NA
prad_p1000	PROS01448-DFCI.10-448.P27-SM-5CQ5J	PROS01448-DFCI.10-448.P27-SM-5CQ5J	prad_p1000:PROS01448-DFCI.10-448.P27-SM-5CQ5J	prad_p1000:PROS01448-DFCI.10-448.P27-SM-5CQ5J	0	NA	Prostate Cancer	Prostate Adenocarcinoma	0.0415	NA	NA	NA	NA	NA	NA	58	PRAD	NA	NA	1	NA	Metastasis	Male	Matched	1.93333	NA	NA	NA	NA	NA	NA	NA	NA	NA	NA	NA	NA	NA	NA	NA	NA	NA	NA	NA	NA	NA	NA	NA	NA
prad_p1000	PROS01448-DFCI.10-448.P29-SM-5CQ4S	PROS01448-DFCI.10-448.P29-SM-5CQ4S	prad_p1000:PROS01448-DFCI.10-448.P29-SM-5CQ4S	prad_p1000:PROS01448-DFCI.10-448.P29-SM-5CQ4S	0	NA	Prostate Cancer	Prostate Adenocarcinoma	0.1622	NA	NA	NA	NA	NA	NA	77	PRAD	NA	NA	1	NA	Metastasis	Male	Matched	2.56667	NA	NA	NA	NA	NA	NA	NA	NA	NA	NA	NA	NA	NA	NA	NA	NA	NA	NA	NA	NA	NA	NA	NA	NA
prad_p1000	PROS01448-DFCI.10-448.P30-SM-5CQ4V	PROS01448-DFCI.10-448.P30-SM-5CQ4V	prad_p1000:PROS01448-DFCI.10-448.P30-SM-5CQ4V	prad_p1000:PROS01448-DFCI.10-448.P30-SM-5CQ4V	0	NA	Prostate Cancer	Prostate Adenocarcinoma	0.0305	NA	NA	NA	NA	NA	NA	54	PRAD	NA	NA	1	NA	Metastasis	Male	Matched	1.8	NA	NA	NA	NA	NA	NA	NA	NA	NA	NA	NA	NA	NA	NA	NA	NA	NA	NA	NA	NA	NA	NA	NA	NA
prad_p1000	PROS01448-DFCI.10-448.P31-SM-5CQ5A	PROS01448-DFCI.10-448.P31-SM-5CQ5A	prad_p1000:PROS01448-DFCI.10-448.P31-SM-5CQ5A	prad_p1000:PROS01448-DFCI.10-448.P31-SM-5CQ5A	0	NA	Prostate Cancer	Prostate Adenocarcinoma	0.0684	NA	NA	NA	NA	NA	NA	68	PRAD	NA	NA	1	NA	Metastasis	Male	Matched	2.26667	NA	NA	NA	NA	NA	NA	NA	NA	NA	NA	NA	NA	NA	NA	NA	NA	NA	NA	NA	NA	72	NA	NA	NA
prad_p1000	PROS01448-DFCI.10-448.P34-SM-5CQ4Y	PROS01448-DFCI.10-448.P34-SM-5CQ4Y	prad_p1000:PROS01448-DFCI.10-448.P34-SM-5CQ4Y	prad_p1000:PROS01448-DFCI.10-448.P34-SM-5CQ4Y	0	NA	Prostate Cancer	Prostate Adenocarcinoma	0.0028	NA	NA	NA	NA	NA	NA	8	PRAD	NA	NA	1	NA	Metastasis	Male	Matched	0.266667	NA	NA	NA	NA	NA	NA	NA	NA	NA	NA	NA	NA	NA	NA	NA	NA	NA	NA	NA	NA	71	NA	NA	NA
prad_p1000	PROS01448-DFCI.10-448.P38-SM-5CQ52	PROS01448-DFCI.10-448.P38-SM-5CQ52	prad_p1000:PROS01448-DFCI.10-448.P38-SM-5CQ52	prad_p1000:PROS01448-DFCI.10-448.P38-SM-5CQ52	0	NA	Prostate Cancer	Prostate Adenocarcinoma	0.1948	NA	NA	NA	NA	NA	NA	43	PRAD	NA	NA	1	NA	Metastasis	Male	Matched	1.43333	NA	NA	NA	NA	NA	NA	NA	NA	NA	NA	NA	NA	NA	NA	NA	NA	NA	NA	NA	NA	NA	NA	NA	NA
prad_p1000	PROS01448-DFCI.10-448.P40-SM-5CQ53	PROS01448-DFCI.10-448.P40-SM-5CQ53	prad_p1000:PROS01448-DFCI.10-448.P40-SM-5CQ53	prad_p1000:PROS01448-DFCI.10-448.P40-SM-5CQ53	0	NA	Prostate Cancer	Prostate Adenocarcinoma	0.0096	NA	NA	NA	NA	NA	NA	49	PRAD	NA	NA	1	NA	Metastasis	Male	Matched	1.63333	NA	NA	NA	NA	NA	NA	NA	NA	NA	NA	NA	NA	NA	NA	NA	NA	NA	NA	NA	NA	NA	NA	NA	NA
prad_p1000	PROS01448-DFCI.10-448.P42-SM-5CQ55	PROS01448-DFCI.10-448.P42-SM-5CQ55	prad_p1000:PROS01448-DFCI.10-448.P42-SM-5CQ55	prad_p1000:PROS01448-DFCI.10-448.P42-SM-5CQ55	0	NA	Prostate Cancer	Prostate Adenocarcinoma	0.3686	NA	NA	NA	NA	NA	NA	53	PRAD	NA	NA	1	NA	Metastasis	Male	Matched	1.76667	NA	NA	NA	NA	NA	NA	NA	NA	NA	NA	NA	NA	NA	NA	NA	NA	NA	NA	NA	NA	77	NA	NA	NA
prad_p1000	PROS10448-1115126-SM-5EEBI	PROS10448-1115126-SM-5EEBI	prad_p1000:PROS10448-1115126-SM-5EEBI	prad_p1000:PROS10448-1115126-SM-5EEBI	0	NA	Prostate Cancer	Prostate Adenocarcinoma	0.0017	NA	NA	Bone	NA	NA	NA	4	PRAD	NA	NA	1	NA	Metastasis	Male	Matched	0.133333	NA	NA	NA	NA	NA	NA	NA	NA	NA	NA	NA	NA	NA	NA	NA	NA	NA	NA	NA	NA	NA	NA	NA	NA
prad_p1000	PROS10448-1115150-SM-5EEBK	PROS10448-1115150-SM-5EEBK	prad_p1000:PROS10448-1115150-SM-5EEBK	prad_p1000:PROS10448-1115150-SM-5EEBK	0	NA	Prostate Cancer	Prostate Adenocarcinoma	0.0014	NA	NA	Bone	NA	NA	NA	9	PRAD	NA	NA	1	NA	Metastasis	Male	Matched	0.3	NA	NA	NA	NA	NA	NA	NA	NA	NA	NA	NA	NA	NA	NA	NA	NA	NA	NA	NA	NA	NA	NA	NA	NA
prad_p1000	PROS10448-1115154-SM-5EEBM	PROS10448-1115154-SM-5EEBM	prad_p1000:PROS10448-1115154-SM-5EEBM	prad_p1000:PROS10448-1115154-SM-5EEBM	0	NA	Prostate Cancer	Prostate Adenocarcinoma	0.5401	NA	NA	Lymph node	NA	NA	NA	41	PRAD	NA	NA	1	NA	Metastasis	Male	Matched	1.36667	NA	NA	NA	NA	NA	NA	NA	NA	NA	NA	NA	NA	NA	NA	NA	NA	NA	NA	NA	NA	49	NA	NA	NA
prad_p1000	PROS10448-1115156-SM-5EEBN	PROS10448-1115156-SM-5EEBN	prad_p1000:PROS10448-1115156-SM-5EEBN	prad_p1000:PROS10448-1115156-SM-5EEBN	0	NA	Prostate Cancer	Prostate Adenocarcinoma	0.4956	NA	NA	Lymph node	NA	NA	NA	39	PRAD	NA	NA	1	NA	Metastasis	Male	Matched	1.3	NA	NA	NA	NA	NA	NA	NA	NA	NA	NA	NA	NA	NA	NA	NA	NA	NA	NA	NA	NA	78	NA	NA	NA
prad_p1000	PROS10448-1115157-SM-5EEBO	PROS10448-1115157-SM-5EEBO	prad_p1000:PROS10448-1115157-SM-5EEBO	prad_p1000:PROS10448-1115157-SM-5EEBO	0	NA	Prostate Cancer	Prostate Adenocarcinoma	0.3831	NA	NA	Bond	NA	NA	NA	61	PRAD	NA	NA	1	NA	Metastasis	Male	Matched	2.03333	NA	NA	NA	NA	NA	NA	NA	NA	NA	NA	NA	NA	NA	NA	NA	NA	NA	NA	NA	NA	71	NA	NA	NA
prad_p1000	PROS10448-SUTC.01115081-SM-4JC6A	PROS10448-SUTC.01115081-SM-4JC6A	prad_p1000:PROS10448-SUTC.01115081-SM-4JC6A	prad_p1000:PROS10448-SUTC.01115081-SM-4JC6A	0	NA	Prostate Cancer	Prostate Adenocarcinoma	0.0287	NA	NA	NA	NA	NA	NA	20	PRAD	NA	NA	1	NA	Metastasis	Male	Matched	0.666667	NA	NA	NA	NA	NA	NA	NA	NA	NA	NA	NA	NA	NA	NA	NA	NA	NA	NA	NA	NA	NA	NA	NA	NA
prad_p1000	PROS10448-SUTC.01115082-SM-4JC6B	PROS10448-SUTC.01115082-SM-4JC6B	prad_p1000:PROS10448-SUTC.01115082-SM-4JC6B	prad_p1000:PROS10448-SUTC.01115082-SM-4JC6B	0	NA	Prostate Cancer	Prostate Adenocarcinoma	0.2487	NA	NA	NA	NA	NA	NA	49	PRAD	NA	NA	1	NA	Metastasis	Male	Matched	1.63333	NA	NA	NA	NA	NA	NA	NA	NA	NA	NA	NA	NA	NA	NA	NA	NA	NA	NA	NA	NA	72	NA	NA	NA
prad_p1000	PROS10448-SUTC.01115084-SM-4JC6H	PROS10448-SUTC.01115084-SM-4JC6H	prad_p1000:PROS10448-SUTC.01115084-SM-4JC6H	prad_p1000:PROS10448-SUTC.01115084-SM-4JC6H	0	NA	Prostate Cancer	Prostate Adenocarcinoma	0.0075	NA	NA	NA	NA	NA	NA	37	PRAD	NA	NA	1	NA	Metastasis	Male	Matched	1.23333	NA	NA	NA	NA	NA	NA	NA	NA	NA	NA	NA	NA	NA	NA	NA	NA	NA	NA	NA	NA	NA	NA	NA	NA
prad_p1000	PROS10448-SUTC.01115085-SM-4JC6J	PROS10448-SUTC.01115085-SM-4JC6J	prad_p1000:PROS10448-SUTC.01115085-SM-4JC6J	prad_p1000:PROS10448-SUTC.01115085-SM-4JC6J	0	NA	Prostate Cancer	Prostate Adenocarcinoma	0.0024	NA	NA	NA	NA	NA	NA	14	PRAD	NA	NA	1	NA	Metastasis	Male	Matched	0.466667	NA	NA	NA	NA	NA	NA	NA	NA	NA	NA	NA	NA	NA	NA	NA	NA	NA	NA	NA	NA	NA	NA	NA	NA
prad_p1000	PROS10448-SUTC.01115086-SM-4JC6K	PROS10448-SUTC.01115086-SM-4JC6K	prad_p1000:PROS10448-SUTC.01115086-SM-4JC6K	prad_p1000:PROS10448-SUTC.01115086-SM-4JC6K	0	NA	Prostate Cancer	Prostate Adenocarcinoma	0.1106	NA	NA	NA	NA	NA	NA	54	PRAD	NA	NA	1	NA	Metastasis	Male	Matched	1.8	NA	NA	NA	NA	NA	NA	NA	NA	NA	NA	NA	NA	NA	NA	NA	NA	NA	NA	NA	NA	79	NA	NA	NA
prad_p1000	PROS10448-SUTC.01115088-SM-4JC6Q	PROS10448-SUTC.01115088-SM-4JC6Q	prad_p1000:PROS10448-SUTC.01115088-SM-4JC6Q	prad_p1000:PROS10448-SUTC.01115088-SM-4JC6Q	0	NA	Prostate Cancer	Prostate Adenocarcinoma	0.1025	NA	NA	NA	NA	NA	NA	59	PRAD	NA	NA	1	NA	Metastasis	Male	Matched	1.96667	NA	NA	NA	NA	NA	NA	NA	NA	NA	NA	NA	NA	NA	NA	NA	NA	NA	NA	NA	NA	NA	NA	NA	NA
prad_p1000	PROS10448-SUTC.01115089-SM-4JC6T	PROS10448-SUTC.01115089-SM-4JC6T	prad_p1000:PROS10448-SUTC.01115089-SM-4JC6T	prad_p1000:PROS10448-SUTC.01115089-SM-4JC6T	0	NA	Prostate Cancer	Prostate Adenocarcinoma	0.312	NA	NA	NA	NA	NA	NA	32	PRAD	NA	NA	1	NA	Metastasis	Male	Matched	1.06667	NA	NA	NA	NA	NA	NA	NA	NA	NA	NA	NA	NA	NA	NA	NA	NA	NA	NA	NA	NA	NA	NA	NA	NA
prad_p1000	PROS10448-SUTC.01115090-SM-4JC6W	PROS10448-SUTC.01115090-SM-4JC6W	prad_p1000:PROS10448-SUTC.01115090-SM-4JC6W	prad_p1000:PROS10448-SUTC.01115090-SM-4JC6W	0	NA	Prostate Cancer	Prostate Adenocarcinoma	0.2243	NA	NA	NA	NA	NA	NA	41	PRAD	NA	NA	1	NA	Metastasis	Male	Matched	1.36667	NA	NA	NA	NA	NA	NA	NA	NA	NA	NA	NA	NA	NA	NA	NA	NA	NA	NA	NA	NA	NA	NA	NA	NA
prad_p1000	PROS10448-SUTC.01115091-SM-4JC6Y	PROS10448-SUTC.01115091-SM-4JC6Y	prad_p1000:PROS10448-SUTC.01115091-SM-4JC6Y	prad_p1000:PROS10448-SUTC.01115091-SM-4JC6Y	0	NA	Prostate Cancer	Prostate Adenocarcinoma	0.2001	NA	NA	NA	NA	NA	NA	23	PRAD	NA	NA	1	NA	Metastasis	Male	Matched	0.766667	NA	NA	NA	NA	NA	NA	NA	NA	NA	NA	NA	NA	NA	NA	NA	NA	NA	NA	NA	NA	NA	NA	NA	NA
prad_p1000	PROS10448-SUTC.01115092-SM-4JC74	PROS10448-SUTC.01115092-SM-4JC74	prad_p1000:PROS10448-SUTC.01115092-SM-4JC74	prad_p1000:PROS10448-SUTC.01115092-SM-4JC74	0	NA	Prostate Cancer	Prostate Adenocarcinoma	0.0493	NA	NA	NA	NA	NA	NA	38	PRAD	NA	NA	1	NA	Metastasis	Male	Matched	1.26667	NA	NA	NA	NA	NA	NA	NA	NA	NA	NA	NA	NA	NA	NA	NA	NA	NA	NA	NA	NA	NA	NA	NA	NA
prad_p1000	PROS10448P28-SU2C.01115016-SM-42W9D	PROS10448P28-SU2C.01115016-SM-42W9D	prad_p1000:PROS10448P28-SU2C.01115016-SM-42W9D	prad_p1000:PROS10448P28-SU2C.01115016-SM-42W9D	0	NA	Prostate Cancer	Prostate Adenocarcinoma	0.1858	NA	NA	NA	NA	NA	NA	71	PRAD	NA	NA	1	NA	Metastasis	Male	Matched	2.36667	NA	NA	NA	NA	NA	NA	NA	NA	NA	NA	NA	NA	NA	NA	NA	NA	NA	NA	NA	NA	NA	NA	NA	NA
prad_p1000	PROS11496-6115236-SM-6CNPW	PROS11496-6115236-SM-6CNPW	prad_p1000:PROS11496-6115236-SM-6CNPW	prad_p1000:PROS11496-6115236-SM-6CNPW	0	NA	Prostate Cancer	Prostate Adenocarcinoma	0.2722	NA	NA	NA	NA	NA	NA	39	PRAD	NA	NA	1	NA	Metastasis	Male	Matched	1.3	NA	NA	NA	NA	NA	NA	NA	NA	NA	NA	NA	NA	NA	NA	NA	NA	NA	NA	NA	NA	NA	NA	NA	NA
prad_p1000	PROS11496-6115285-SM-6CNPX	PROS11496-6115285-SM-6CNPX	prad_p1000:PROS11496-6115285-SM-6CNPX	prad_p1000:PROS11496-6115285-SM-6CNPX	0	NA	Prostate Cancer	Prostate Adenocarcinoma	0.05	NA	NA	NA	NA	NA	NA	41	PRAD	NA	NA	1	NA	Metastasis	Male	Matched	1.36667	NA	NA	NA	NA	NA	NA	NA	NA	NA	NA	NA	NA	NA	NA	NA	NA	NA	NA	NA	NA	NA	NA	NA	NA
prad_p1000	PROS11496-6115286-SM-6CNPY	PROS11496-6115286-SM-6CNPY	prad_p1000:PROS11496-6115286-SM-6CNPY	prad_p1000:PROS11496-6115286-SM-6CNPY	0	NA	Prostate Cancer	Prostate Adenocarcinoma	0.1882	NA	NA	NA	NA	NA	NA	105	PRAD	NA	NA	1	NA	Metastasis	Male	Matched	3.5	NA	NA	NA	NA	NA	NA	NA	NA	NA	NA	NA	NA	NA	NA	NA	NA	NA	NA	NA	NA	NA	NA	NA	NA
prad_p1000	PROS11496-6115288-SM-6CNQ1	PROS11496-6115288-SM-6CNQ1	prad_p1000:PROS11496-6115288-SM-6CNQ1	prad_p1000:PROS11496-6115288-SM-6CNQ1	0	NA	Prostate Cancer	Prostate Adenocarcinoma	0.6829	NA	NA	NA	NA	NA	NA	79	PRAD	NA	NA	1	NA	Metastasis	Male	Matched	2.63333	NA	NA	NA	NA	NA	NA	NA	NA	NA	NA	NA	NA	NA	NA	NA	NA	NA	NA	NA	NA	NA	NA	NA	NA
prad_p1000	PROS11496-6115295-SM-6CNQ7	PROS11496-6115295-SM-6CNQ7	prad_p1000:PROS11496-6115295-SM-6CNQ7	prad_p1000:PROS11496-6115295-SM-6CNQ7	0	NA	Prostate Cancer	Prostate Adenocarcinoma	0.5112	NA	NA	NA	NA	NA	NA	64	PRAD	NA	NA	1	NA	Metastasis	Male	Matched	2.13333	NA	NA	NA	NA	NA	NA	NA	NA	NA	NA	NA	NA	NA	NA	NA	NA	NA	NA	NA	NA	NA	NA	NA	NA
prad_p1000	PROS11496-6115317-SM-6CNQ2	PROS11496-6115317-SM-6CNQ2	prad_p1000:PROS11496-6115317-SM-6CNQ2	prad_p1000:PROS11496-6115317-SM-6CNQ2	0	NA	Prostate Cancer	Prostate Adenocarcinoma	0.4681	NA	NA	NA	NA	NA	NA	90	PRAD	NA	NA	1	NA	Metastasis	Male	Matched	3	NA	NA	NA	NA	NA	NA	NA	NA	NA	NA	NA	NA	NA	NA	NA	NA	NA	NA	NA	NA	NA	NA	NA	NA
prad_p1000	PROS11496-6115319-SM-6CNQ3	PROS11496-6115319-SM-6CNQ3	prad_p1000:PROS11496-6115319-SM-6CNQ3	prad_p1000:PROS11496-6115319-SM-6CNQ3	0	NA	Prostate Cancer	Prostate Adenocarcinoma	0.4868	NA	NA	NA	NA	NA	NA	66	PRAD	NA	NA	1	NA	Metastasis	Male	Matched	2.2	NA	NA	NA	NA	NA	NA	NA	NA	NA	NA	NA	NA	NA	NA	NA	NA	NA	NA	NA	NA	NA	NA	NA	NA
prad_p1000	PROS11496-6115320-SM-6CNQ4	PROS11496-6115320-SM-6CNQ4	prad_p1000:PROS11496-6115320-SM-6CNQ4	prad_p1000:PROS11496-6115320-SM-6CNQ4	0	NA	Prostate Cancer	Prostate Adenocarcinoma	0.3197	NA	NA	NA	NA	NA	NA	50	PRAD	NA	NA	1	NA	Metastasis	Male	Matched	1.66667	NA	NA	NA	NA	NA	NA	NA	NA	NA	NA	NA	NA	NA	NA	NA	NA	NA	NA	NA	NA	NA	NA	NA	NA
prad_p1000	PROS11496-6115321-SM-6CNQ5	PROS11496-6115321-SM-6CNQ5	prad_p1000:PROS11496-6115321-SM-6CNQ5	prad_p1000:PROS11496-6115321-SM-6CNQ5	0	NA	Prostate Cancer	Prostate Adenocarcinoma	0.1271	NA	NA	NA	NA	NA	NA	1065	PRAD	NA	NA	1	NA	Metastasis	Male	Matched	35.5	NA	NA	NA	NA	NA	NA	NA	NA	NA	NA	NA	NA	NA	NA	NA	NA	NA	NA	NA	NA	NA	NA	NA	NA
prad_p1000	PROS11496-6115322-SM-6CNQ6	PROS11496-6115322-SM-6CNQ6	prad_p1000:PROS11496-6115322-SM-6CNQ6	prad_p1000:PROS11496-6115322-SM-6CNQ6	0	NA	Prostate Cancer	Prostate Adenocarcinoma	0.4862	NA	NA	NA	NA	NA	NA	41	PRAD	NA	NA	1	NA	Metastasis	Male	Matched	1.36667	NA	NA	NA	NA	NA	NA	NA	NA	NA	NA	NA	NA	NA	NA	NA	NA	NA	NA	NA	NA	NA	NA	NA	NA
prad_p1000	PROS11496-6115323-SM-6CNQ8	PROS11496-6115323-SM-6CNQ8	prad_p1000:PROS11496-6115323-SM-6CNQ8	prad_p1000:PROS11496-6115323-SM-6CNQ8	0	NA	Prostate Cancer	Prostate Adenocarcinoma	0.1902	NA	NA	NA	NA	NA	NA	39	PRAD	NA	NA	1	NA	Metastasis	Male	Matched	1.3	NA	NA	NA	NA	NA	NA	NA	NA	NA	NA	NA	NA	NA	NA	NA	NA	NA	NA	NA	NA	NA	NA	NA	NA
prad_p1000	PROS12319B-SU2C-06115114-SM-4W2N9	PROS12319B-SU2C-06115114-SM-4W2N9	prad_p1000:PROS12319B-SU2C-06115114-SM-4W2N9	prad_p1000:PROS12319B-SU2C-06115114-SM-4W2N9	0	NA	Prostate Cancer	Prostate Adenocarcinoma	0.2724	NA	NA	NA	NA	NA	NA	163	PRAD	NA	NA	1	NA	Metastasis	Male	Matched	5.43333	NA	NA	NA	NA	NA	NA	NA	NA	NA	NA	NA	NA	NA	NA	NA	NA	NA	NA	NA	NA	80	NA	NA	NA
prad_p1000	PROS12319B-SU2C-06115115-SM-4W2NA	PROS12319B-SU2C-06115115-SM-4W2NA	prad_p1000:PROS12319B-SU2C-06115115-SM-4W2NA	prad_p1000:PROS12319B-SU2C-06115115-SM-4W2NA	0	NA	Prostate Cancer	Prostate Adenocarcinoma	0.5235	NA	NA	NA	NA	NA	NA	90	PRAD	NA	NA	1	NA	Metastasis	Male	Matched	3	NA	NA	NA	NA	NA	NA	NA	NA	NA	NA	NA	NA	NA	NA	NA	NA	NA	NA	NA	NA	79	NA	NA	NA
prad_p1000	PROS12319B-SU2C-06115116-SM-4W2NB	PROS12319B-SU2C-06115116-SM-4W2NB	prad_p1000:PROS12319B-SU2C-06115116-SM-4W2NB	prad_p1000:PROS12319B-SU2C-06115116-SM-4W2NB	0	NA	Prostate Cancer	Prostate Adenocarcinoma	0.0237	NA	NA	NA	NA	NA	NA	69	PRAD	NA	NA	1	NA	Metastasis	Male	Matched	2.3	NA	NA	NA	NA	NA	NA	NA	NA	NA	NA	NA	NA	NA	NA	NA	NA	NA	NA	NA	NA	83	NA	NA	NA
prad_p1000	PROS12319B-SU2C-06115117-SM-4W2NC	PROS12319B-SU2C-06115117-SM-4W2NC	prad_p1000:PROS12319B-SU2C-06115117-SM-4W2NC	prad_p1000:PROS12319B-SU2C-06115117-SM-4W2NC	0	NA	Prostate Cancer	Prostate Adenocarcinoma	0.1497	NA	NA	NA	NA	NA	NA	48	PRAD	NA	NA	1	NA	Metastasis	Male	Matched	1.6	NA	NA	NA	NA	NA	NA	NA	NA	NA	NA	NA	NA	NA	NA	NA	NA	NA	NA	NA	NA	67	NA	NA	NA
prad_p1000	PROS12319B-SU2C-06115118-SM-4W2ND	PROS12319B-SU2C-06115118-SM-4W2ND	prad_p1000:PROS12319B-SU2C-06115118-SM-4W2ND	prad_p1000:PROS12319B-SU2C-06115118-SM-4W2ND	0	NA	Prostate Cancer	Prostate Adenocarcinoma	0.3744	NA	NA	NA	NA	NA	NA	51	PRAD	NA	NA	1	NA	Metastasis	Male	Matched	1.7	NA	NA	NA	NA	NA	NA	NA	NA	NA	NA	NA	NA	NA	NA	NA	NA	NA	NA	NA	NA	69	NA	NA	NA
prad_p1000	PROS12319B-SU2C-06115119-SM-4W2NE	PROS12319B-SU2C-06115119-SM-4W2NE	prad_p1000:PROS12319B-SU2C-06115119-SM-4W2NE	prad_p1000:PROS12319B-SU2C-06115119-SM-4W2NE	0	NA	Prostate Cancer	Prostate Adenocarcinoma	0.0049	NA	NA	NA	NA	NA	NA	121	PRAD	NA	NA	1	NA	Metastasis	Male	Matched	4.03333	NA	NA	NA	NA	NA	NA	NA	NA	NA	NA	NA	NA	NA	NA	NA	NA	NA	NA	NA	NA	87	NA	NA	NA
prad_p1000	PROS12319B-SU2C-06115120-SM-4W2NF	PROS12319B-SU2C-06115120-SM-4W2NF	prad_p1000:PROS12319B-SU2C-06115120-SM-4W2NF	prad_p1000:PROS12319B-SU2C-06115120-SM-4W2NF	0	NA	Prostate Cancer	Prostate Adenocarcinoma	0.5876	NA	NA	NA	NA	NA	NA	108	PRAD	NA	NA	1	NA	Metastasis	Male	Matched	3.6	NA	NA	NA	NA	NA	NA	NA	NA	NA	NA	NA	NA	NA	NA	NA	NA	NA	NA	NA	NA	65	NA	NA	NA
prad_p1000	PROS12319B-SU2C-06115121-SM-4W2NG	PROS12319B-SU2C-06115121-SM-4W2NG	prad_p1000:PROS12319B-SU2C-06115121-SM-4W2NG	prad_p1000:PROS12319B-SU2C-06115121-SM-4W2NG	0	NA	Prostate Cancer	Prostate Adenocarcinoma	0.5844	NA	NA	NA	NA	NA	NA	47	PRAD	NA	NA	1	NA	Metastasis	Male	Matched	1.56667	NA	NA	NA	NA	NA	NA	NA	NA	NA	NA	NA	NA	NA	NA	NA	NA	NA	NA	NA	NA	55	NA	NA	NA
prad_p1000	PROS12319B-SU2C-06115122-SM-4W2NH	PROS12319B-SU2C-06115122-SM-4W2NH	prad_p1000:PROS12319B-SU2C-06115122-SM-4W2NH	prad_p1000:PROS12319B-SU2C-06115122-SM-4W2NH	0	NA	Prostate Cancer	Prostate Adenocarcinoma	0.4983	NA	NA	NA	NA	NA	NA	53	PRAD	NA	NA	1	NA	Metastasis	Male	Matched	1.76667	NA	NA	NA	NA	NA	NA	NA	NA	NA	NA	NA	NA	NA	NA	NA	NA	NA	NA	NA	NA	55	NA	NA	NA
prad_p1000	PROS12319B-SU2C-06115123-SM-4W2NI	PROS12319B-SU2C-06115123-SM-4W2NI	prad_p1000:PROS12319B-SU2C-06115123-SM-4W2NI	prad_p1000:PROS12319B-SU2C-06115123-SM-4W2NI	0	NA	Prostate Cancer	Prostate Adenocarcinoma	0.2627	NA	NA	NA	NA	NA	NA	50	PRAD	NA	NA	1	NA	Metastasis	Male	Matched	1.66667	NA	NA	NA	NA	NA	NA	NA	NA	NA	NA	NA	NA	NA	NA	NA	NA	NA	NA	NA	NA	62	NA	NA	NA
prad_p1000	SC_9001	SC_9001	prad_p1000:SC_9001	prad_p1000:SC_9001	0	NA	Prostate Cancer	Prostate Adenocarcinoma	0.2947	NA	NA	Liver	NA	NA	NA	39	PRAD	NA	NA	1	NA	Metastasis	Male	Matched	1.3	NA	NA	NA	NA	NA	NA	NA	NA	NA	NA	NA	NA	NA	NA	NA	NA	NA	NA	NA	NA	NA	NA	NA	NA
prad_p1000	SC_9002	SC_9002	prad_p1000:SC_9002	prad_p1000:SC_9002	0	NA	Prostate Cancer	Prostate Adenocarcinoma	0.0034	NA	NA	Bone	NA	NA	NA	18	PRAD	NA	NA	1	NA	Metastasis	Male	Matched	0.6	NA	NA	NA	NA	NA	NA	NA	NA	NA	NA	NA	NA	NA	NA	NA	NA	NA	NA	NA	NA	82	NA	NA	NA
prad_p1000	SC_9004	SC_9004	prad_p1000:SC_9004	prad_p1000:SC_9004	0	NA	Prostate Cancer	Prostate Adenocarcinoma	0.4538	NA	NA	Bone	NA	NA	NA	135	PRAD	NA	NA	1	NA	Metastasis	Male	Matched	4.53333	NA	NA	NA	NA	NA	NA	NA	NA	NA	NA	NA	NA	NA	NA	NA	NA	NA	NA	NA	NA	60	NA	NA	NA
prad_p1000	SC_9006	SC_9006	prad_p1000:SC_9006	prad_p1000:SC_9006	0	NA	Prostate Cancer	Prostate Adenocarcinoma	0.027	NA	NA	Lung	NA	NA	NA	51	PRAD	NA	NA	1	NA	Metastasis	Male	Matched	1.7	NA	NA	NA	NA	NA	NA	NA	NA	NA	NA	NA	NA	NA	NA	NA	NA	NA	NA	NA	NA	79	NA	NA	NA
prad_p1000	SC_9007	SC_9007	prad_p1000:SC_9007	prad_p1000:SC_9007	0	NA	Prostate Cancer	Prostate Adenocarcinoma	0.0071	NA	NA	Lymph node	NA	NA	NA	35	PRAD	NA	NA	1	NA	Metastasis	Male	Matched	1.16667	NA	NA	NA	NA	NA	NA	NA	NA	NA	NA	NA	NA	NA	NA	NA	NA	NA	NA	NA	NA	65	NA	NA	NA
prad_p1000	SC_9008	SC_9008	prad_p1000:SC_9008	prad_p1000:SC_9008	0	NA	Prostate Cancer	Prostate Adenocarcinoma	0.2086	NA	NA	Liver	NA	NA	NA	1112	PRAD	NA	NA	1	NA	Metastasis	Male	Matched	37.0667	NA	NA	NA	NA	NA	NA	NA	NA	NA	NA	NA	NA	NA	NA	NA	NA	NA	NA	NA	NA	NA	NA	NA	NA
prad_p1000	SC_9010	SC_9010	prad_p1000:SC_9010	prad_p1000:SC_9010	0	NA	Prostate Cancer	Prostate Adenocarcinoma	0.6567	NA	NA	Lymph node	NA	NA	NA	93	PRAD	NA	NA	1	NA	Metastasis	Male	Matched	3.13333	NA	NA	NA	NA	NA	NA	NA	NA	NA	NA	NA	NA	NA	NA	NA	NA	NA	NA	NA	NA	NA	NA	NA	NA
prad_p1000	SC_9011	SC_9011	prad_p1000:SC_9011	prad_p1000:SC_9011	0	NA	Prostate Cancer	Prostate Adenocarcinoma	0.1326	NA	NA	Lymph node	NA	NA	NA	33	PRAD	NA	NA	1	NA	Metastasis	Male	Matched	1.1	NA	NA	NA	NA	NA	NA	NA	NA	NA	NA	NA	NA	NA	NA	NA	NA	NA	NA	NA	NA	71	NA	NA	NA
prad_p1000	SC_9012	SC_9012	prad_p1000:SC_9012	prad_p1000:SC_9012	0	NA	Prostate Cancer	Prostate Adenocarcinoma	0.1659	NA	NA	Liver	NA	NA	NA	47	PRAD	NA	NA	1	NA	Metastasis	Male	Matched	1.56667	NA	NA	NA	NA	NA	NA	NA	NA	NA	NA	NA	NA	NA	NA	NA	NA	NA	NA	NA	NA	74	NA	NA	NA
prad_p1000	SC_9016	SC_9016	prad_p1000:SC_9016	prad_p1000:SC_9016	0	NA	Prostate Cancer	Prostate Adenocarcinoma	0.3344	NA	NA	Lymph node	NA	NA	NA	58	PRAD	NA	NA	1	NA	Metastasis	Male	Matched	1.93333	NA	NA	NA	NA	NA	NA	NA	NA	NA	NA	NA	NA	NA	NA	NA	NA	NA	NA	NA	NA	69	NA	NA	NA
prad_p1000	SC_9017	SC_9017	prad_p1000:SC_9017	prad_p1000:SC_9017	0	NA	Prostate Cancer	Prostate Adenocarcinoma	0.8393	NA	NA	Liver	NA	NA	NA	28	PRAD	NA	NA	1	NA	Metastasis	Male	Matched	0.933333	NA	NA	NA	NA	NA	NA	NA	NA	NA	NA	NA	NA	NA	NA	NA	NA	NA	NA	NA	NA	66	NA	NA	NA
prad_p1000	SC_9018	SC_9018	prad_p1000:SC_9018	prad_p1000:SC_9018	0	NA	Prostate Cancer	Prostate Adenocarcinoma	0.0193	NA	NA	Bone	NA	NA	NA	43	PRAD	NA	NA	1	NA	Metastasis	Male	Matched	1.43333	NA	NA	NA	NA	NA	NA	NA	NA	NA	NA	NA	NA	NA	NA	NA	NA	NA	NA	NA	NA	73	NA	NA	NA
prad_p1000	SC_9019	SC_9019	prad_p1000:SC_9019	prad_p1000:SC_9019	0	NA	Prostate Cancer	Prostate Adenocarcinoma	0.1345	NA	NA	Bone	NA	NA	NA	51	PRAD	NA	NA	1	NA	Metastasis	Male	Matched	1.7	NA	NA	NA	NA	NA	NA	NA	NA	NA	NA	NA	NA	NA	NA	NA	NA	NA	NA	NA	NA	85	NA	NA	NA
prad_p1000	SC_9021	SC_9021	prad_p1000:SC_9021	prad_p1000:SC_9021	0	NA	Prostate Cancer	Prostate Adenocarcinoma	0.6237	NA	NA	Lymph node	NA	NA	NA	127	PRAD	NA	NA	1	NA	Metastasis	Male	Matched	4.23333	NA	NA	NA	NA	NA	NA	NA	NA	NA	NA	NA	NA	NA	NA	NA	NA	NA	NA	NA	NA	60	NA	NA	NA
prad_p1000	SC_9022	SC_9022	prad_p1000:SC_9022	prad_p1000:SC_9022	0	NA	Prostate Cancer	Prostate Adenocarcinoma	0.3541	NA	NA	Penile	NA	NA	NA	126	PRAD	NA	NA	1	NA	Metastasis	Male	Matched	4.2	NA	NA	NA	NA	NA	NA	NA	NA	NA	NA	NA	NA	NA	NA	NA	NA	NA	NA	NA	NA	66	NA	NA	NA
prad_p1000	SC_9023	SC_9023	prad_p1000:SC_9023	prad_p1000:SC_9023	0	NA	Prostate Cancer	Prostate Adenocarcinoma	0.577	NA	NA	Bone	NA	NA	NA	71	PRAD	NA	NA	1	NA	Metastasis	Male	Matched	2.36667	NA	NA	NA	NA	NA	NA	NA	NA	NA	NA	NA	NA	NA	NA	NA	NA	NA	NA	NA	NA	78	NA	NA	NA
prad_p1000	SC_9024	SC_9024	prad_p1000:SC_9024	prad_p1000:SC_9024	0	NA	Prostate Cancer	Prostate Adenocarcinoma	0.1781	NA	NA	Lymph node	NA	NA	NA	59	PRAD	NA	NA	1	NA	Metastasis	Male	Matched	1.96667	NA	NA	NA	NA	NA	NA	NA	NA	NA	NA	NA	NA	NA	NA	NA	NA	NA	NA	NA	NA	73	NA	NA	NA
prad_p1000	SC_9025	SC_9025	prad_p1000:SC_9025	prad_p1000:SC_9025	0	NA	Prostate Cancer	Prostate Adenocarcinoma	0.0027	NA	NA	Bone	NA	NA	NA	19	PRAD	NA	NA	1	NA	Metastasis	Male	Matched	0.633333	NA	NA	NA	NA	NA	NA	NA	NA	NA	NA	NA	NA	NA	NA	NA	NA	NA	NA	NA	NA	64	NA	NA	NA
prad_p1000	SC_9026	SC_9026	prad_p1000:SC_9026	prad_p1000:SC_9026	0	NA	Prostate Cancer	Prostate Adenocarcinoma	0.3951	NA	NA	Bone	NA	NA	NA	55	PRAD	NA	NA	1	NA	Metastasis	Male	Matched	1.83333	NA	NA	NA	NA	NA	NA	NA	NA	NA	NA	NA	NA	NA	NA	NA	NA	NA	NA	NA	NA	65	NA	NA	NA
prad_p1000	SC_9027	SC_9027	prad_p1000:SC_9027	prad_p1000:SC_9027	0	NA	Prostate Cancer	Prostate Adenocarcinoma	0.462	NA	NA	Bone	NA	NA	NA	142	PRAD	NA	NA	1	NA	Metastasis	Male	Matched	4.73333	NA	NA	NA	NA	NA	NA	NA	NA	NA	NA	NA	NA	NA	NA	NA	NA	NA	NA	NA	NA	69	NA	NA	NA
prad_p1000	SC_9028	SC_9028	prad_p1000:SC_9028	prad_p1000:SC_9028	0	NA	Prostate Cancer	Prostate Adenocarcinoma	0.1934	NA	NA	Prostate	NA	NA	NA	103	PRAD	NA	NA	1	NA	Metastasis	Male	Matched	3.43333	NA	NA	NA	NA	NA	NA	NA	NA	NA	NA	NA	NA	NA	NA	NA	NA	NA	NA	NA	NA	71	NA	NA	NA
prad_p1000	SC_9029	SC_9029	prad_p1000:SC_9029	prad_p1000:SC_9029	0	NA	Prostate Cancer	Prostate Adenocarcinoma	0.2996	NA	NA	Muscle	NA	NA	NA	125	PRAD	NA	NA	1	NA	Metastasis	Male	Matched	4.16667	NA	NA	NA	NA	NA	NA	NA	NA	NA	NA	NA	NA	NA	NA	NA	NA	NA	NA	NA	NA	75	NA	NA	NA
prad_p1000	SC_9030	SC_9030	prad_p1000:SC_9030	prad_p1000:SC_9030	0	NA	Prostate Cancer	Prostate Adenocarcinoma	0.7627	NA	NA	Muscle	NA	NA	NA	70	PRAD	NA	NA	1	NA	Metastasis	Male	Matched	2.33333	NA	NA	NA	NA	NA	NA	NA	NA	NA	NA	NA	NA	NA	NA	NA	NA	NA	NA	NA	NA	66	NA	NA	NA
prad_p1000	SC_9031	SC_9031	prad_p1000:SC_9031	prad_p1000:SC_9031	0	NA	Prostate Cancer	Prostate Adenocarcinoma	0.3188	NA	NA	Liver	NA	NA	NA	36	PRAD	NA	NA	1	NA	Metastasis	Male	Matched	1.2	NA	NA	NA	NA	NA	NA	NA	NA	NA	NA	NA	NA	NA	NA	NA	NA	NA	NA	NA	NA	40	NA	NA	NA
prad_p1000	SC_9032	SC_9032	prad_p1000:SC_9032	prad_p1000:SC_9032	0	NA	Prostate Cancer	Prostate Adenocarcinoma	0.5683	NA	NA	Lymph node	NA	NA	NA	141	PRAD	NA	NA	1	NA	Metastasis	Male	Matched	4.7	NA	NA	NA	NA	NA	NA	NA	NA	NA	NA	NA	NA	NA	NA	NA	NA	NA	NA	NA	NA	80	NA	NA	NA
prad_p1000	SC_9034	SC_9034	prad_p1000:SC_9034	prad_p1000:SC_9034	0	NA	Prostate Cancer	Prostate Adenocarcinoma	0.0466	NA	NA	Bone	NA	NA	NA	125	PRAD	NA	NA	1	NA	Metastasis	Male	Matched	4.2	NA	NA	NA	NA	NA	NA	NA	NA	NA	NA	NA	NA	NA	NA	NA	NA	NA	NA	NA	NA	65	NA	NA	NA
prad_p1000	SC_9035	SC_9035	prad_p1000:SC_9035	prad_p1000:SC_9035	0	NA	Prostate Cancer	Prostate Adenocarcinoma	0.4856	NA	NA	Lymph node	NA	NA	NA	61	PRAD	NA	NA	1	NA	Metastasis	Male	Matched	2.03333	NA	NA	NA	NA	NA	NA	NA	NA	NA	NA	NA	NA	NA	NA	NA	NA	NA	NA	NA	NA	70	NA	NA	NA
prad_p1000	SC_9036	SC_9036	prad_p1000:SC_9036	prad_p1000:SC_9036	0	NA	Prostate Cancer	Prostate Adenocarcinoma	0.3101	NA	NA	Lymph node	NA	NA	NA	52	PRAD	NA	NA	1	NA	Metastasis	Male	Matched	1.73333	NA	NA	NA	NA	NA	NA	NA	NA	NA	NA	NA	NA	NA	NA	NA	NA	NA	NA	NA	NA	72	NA	NA	NA
prad_p1000	SC_9038	SC_9038	prad_p1000:SC_9038	prad_p1000:SC_9038	0	NA	Prostate Cancer	Prostate Adenocarcinoma	0.3481	NA	NA	Lymph node	NA	NA	NA	90	PRAD	NA	NA	1	NA	Metastasis	Male	Matched	3	NA	NA	NA	NA	NA	NA	NA	NA	NA	NA	NA	NA	NA	NA	NA	NA	NA	NA	NA	NA	70	NA	NA	NA
prad_p1000	SC_9039	SC_9039	prad_p1000:SC_9039	prad_p1000:SC_9039	0	NA	Prostate Cancer	Prostate Adenocarcinoma	0.6183	NA	NA	Lymph node	NA	NA	NA	33	PRAD	NA	NA	1	NA	Metastasis	Male	Matched	1.1	NA	NA	NA	NA	NA	NA	NA	NA	NA	NA	NA	NA	NA	NA	NA	NA	NA	NA	NA	NA	64	NA	NA	NA
prad_p1000	SC_9040	SC_9040	prad_p1000:SC_9040	prad_p1000:SC_9040	0	NA	Prostate Cancer	Prostate Adenocarcinoma	0.0213	NA	NA	Bone	NA	NA	NA	4	PRAD	NA	NA	1	NA	Metastasis	Male	Matched	0.133333	NA	NA	NA	NA	NA	NA	NA	NA	NA	NA	NA	NA	NA	NA	NA	NA	NA	NA	NA	NA	82	NA	NA	NA
prad_p1000	SC_9043	SC_9043	prad_p1000:SC_9043	prad_p1000:SC_9043	0	NA	Prostate Cancer	Prostate Adenocarcinoma	0.2847	NA	NA	Bone	NA	NA	NA	33	PRAD	NA	NA	1	NA	Metastasis	Male	Matched	1.1	NA	NA	NA	NA	NA	NA	NA	NA	NA	NA	NA	NA	NA	NA	NA	NA	NA	NA	NA	NA	68	NA	NA	NA
prad_p1000	SC_9046	SC_9046	prad_p1000:SC_9046	prad_p1000:SC_9046	0	NA	Prostate Cancer	Prostate Adenocarcinoma	0.1755	NA	NA	Liver	NA	NA	NA	66	PRAD	NA	NA	1	NA	Metastasis	Male	Matched	2.2	NA	NA	NA	NA	NA	NA	NA	NA	NA	NA	NA	NA	NA	NA	NA	NA	NA	NA	NA	NA	72	NA	NA	NA
prad_p1000	SC_9047	SC_9047	prad_p1000:SC_9047	prad_p1000:SC_9047	0	NA	Prostate Cancer	Prostate Adenocarcinoma	0.069	NA	NA	Bone	NA	NA	NA	885	PRAD	NA	NA	1	NA	Metastasis	Male	Matched	29.5	NA	NA	NA	NA	NA	NA	NA	NA	NA	NA	NA	NA	NA	NA	NA	NA	NA	NA	NA	NA	73	NA	NA	NA
prad_p1000	SC_9048	SC_9048	prad_p1000:SC_9048	prad_p1000:SC_9048	0	NA	Prostate Cancer	Prostate Adenocarcinoma	0.1957	NA	NA	Bone	NA	NA	NA	43	PRAD	NA	NA	1	NA	Metastasis	Male	Matched	1.4	NA	NA	NA	NA	NA	NA	NA	NA	NA	NA	NA	NA	NA	NA	NA	NA	NA	NA	NA	NA	73	NA	NA	NA
prad_p1000	SC_9049	SC_9049	prad_p1000:SC_9049	prad_p1000:SC_9049	0	NA	Prostate Cancer	Prostate Adenocarcinoma	0.1907	NA	NA	Bone	NA	NA	NA	51	PRAD	NA	NA	1	NA	Metastasis	Male	Matched	1.7	NA	NA	NA	NA	NA	NA	NA	NA	NA	NA	NA	NA	NA	NA	NA	NA	NA	NA	NA	NA	70	NA	NA	NA
prad_p1000	SC_9054	SC_9054	prad_p1000:SC_9054	prad_p1000:SC_9054	0	NA	Prostate Cancer	Prostate Adenocarcinoma	0.6375	NA	NA	Lymph node	NA	NA	NA	125	PRAD	NA	NA	1	NA	Metastasis	Male	Matched	4.16667	NA	NA	NA	NA	NA	NA	NA	NA	NA	NA	NA	NA	NA	NA	NA	NA	NA	NA	NA	NA	72	NA	NA	NA
prad_p1000	SC_9055	SC_9055	prad_p1000:SC_9055	prad_p1000:SC_9055	0	NA	Prostate Cancer	Prostate Adenocarcinoma	0.3974	NA	NA	Lymph node	NA	NA	NA	68	PRAD	NA	NA	1	NA	Metastasis	Male	Matched	2.26667	NA	NA	NA	NA	NA	NA	NA	NA	NA	NA	NA	NA	NA	NA	NA	NA	NA	NA	NA	NA	59	NA	NA	NA
prad_p1000	SC_9056	SC_9056	prad_p1000:SC_9056	prad_p1000:SC_9056	0	NA	Prostate Cancer	Prostate Adenocarcinoma	0.1167	NA	NA	Bone	NA	NA	NA	32	PRAD	NA	NA	1	NA	Metastasis	Male	Matched	1.06667	NA	NA	NA	NA	NA	NA	NA	NA	NA	NA	NA	NA	NA	NA	NA	NA	NA	NA	NA	NA	60	NA	NA	NA
prad_p1000	SC_9058	SC_9058	prad_p1000:SC_9058	prad_p1000:SC_9058	0	NA	Prostate Cancer	Prostate Adenocarcinoma	0.6395	NA	NA	Lymph node	NA	NA	NA	204	PRAD	NA	NA	1	NA	Metastasis	Male	Matched	6.8	NA	NA	NA	NA	NA	NA	NA	NA	NA	NA	NA	NA	NA	NA	NA	NA	NA	NA	NA	NA	70	NA	NA	NA
prad_p1000	SC_9059	SC_9059	prad_p1000:SC_9059	prad_p1000:SC_9059	0	NA	Prostate Cancer	Prostate Adenocarcinoma	0.6316	NA	NA	Lymph node	NA	NA	NA	45	PRAD	NA	NA	1	NA	Metastasis	Male	Matched	1.5	NA	NA	NA	NA	NA	NA	NA	NA	NA	NA	NA	NA	NA	NA	NA	NA	NA	NA	NA	NA	61	NA	NA	NA
prad_p1000	SC_9060	SC_9060	prad_p1000:SC_9060	prad_p1000:SC_9060	0	NA	Prostate Cancer	Prostate Adenocarcinoma	0.3355	NA	NA	Liver	NA	NA	NA	111	PRAD	NA	NA	1	NA	Metastasis	Male	Matched	3.7	NA	NA	NA	NA	NA	NA	NA	NA	NA	NA	NA	NA	NA	NA	NA	NA	NA	NA	NA	NA	65	NA	NA	NA
prad_p1000	SC_9061	SC_9061	prad_p1000:SC_9061	prad_p1000:SC_9061	0	NA	Prostate Cancer	Prostate Adenocarcinoma	0.5646	NA	NA	Bone	NA	NA	NA	175	PRAD	NA	NA	1	NA	Metastasis	Male	Matched	5.83333	NA	NA	NA	NA	NA	NA	NA	NA	NA	NA	NA	NA	NA	NA	NA	NA	NA	NA	NA	NA	71	NA	NA	NA
prad_p1000	SC_9063	SC_9063	prad_p1000:SC_9063	prad_p1000:SC_9063	0	NA	Prostate Cancer	Prostate Adenocarcinoma	0.2267	NA	NA	Lymph node	NA	NA	NA	41	PRAD	NA	NA	1	NA	Metastasis	Male	Matched	1.36667	NA	NA	NA	NA	NA	NA	NA	NA	NA	NA	NA	NA	NA	NA	NA	NA	NA	NA	NA	NA	66	NA	NA	NA
prad_p1000	SC_9065	SC_9065	prad_p1000:SC_9065	prad_p1000:SC_9065	0	NA	Prostate Cancer	Prostate Adenocarcinoma	0.1103	NA	NA	Bone	NA	NA	NA	43	PRAD	NA	NA	1	NA	Metastasis	Male	Matched	1.43333	NA	NA	NA	NA	NA	NA	NA	NA	NA	NA	NA	NA	NA	NA	NA	NA	NA	NA	NA	NA	NA	NA	NA	NA
prad_p1000	SC_9068	SC_9068	prad_p1000:SC_9068	prad_p1000:SC_9068	0	NA	Prostate Cancer	Prostate Adenocarcinoma	0.5245	NA	NA	Lymph node	NA	NA	NA	132	PRAD	NA	NA	1	NA	Metastasis	Male	Matched	4.4	NA	NA	NA	NA	NA	NA	NA	NA	NA	NA	NA	NA	NA	NA	NA	NA	NA	NA	NA	NA	74	NA	NA	NA
prad_p1000	SC_9071	SC_9071	prad_p1000:SC_9071	prad_p1000:SC_9071	0	NA	Prostate Cancer	Prostate Adenocarcinoma	0.35	NA	NA	Bone	NA	NA	NA	77	PRAD	NA	NA	1	NA	Metastasis	Male	Matched	2.56667	NA	NA	NA	NA	NA	NA	NA	NA	NA	NA	NA	NA	NA	NA	NA	NA	NA	NA	NA	NA	67	NA	NA	NA
prad_p1000	SC_9072	SC_9072	prad_p1000:SC_9072	prad_p1000:SC_9072	0	NA	Prostate Cancer	Prostate Adenocarcinoma	0.5316	NA	NA	Bone	NA	NA	NA	147	PRAD	NA	NA	1	NA	Metastasis	Male	Matched	4.9	NA	NA	NA	NA	NA	NA	NA	NA	NA	NA	NA	NA	NA	NA	NA	NA	NA	NA	NA	NA	74	NA	NA	NA
prad_p1000	SC_9073	SC_9073	prad_p1000:SC_9073	prad_p1000:SC_9073	0	NA	Prostate Cancer	Prostate Adenocarcinoma	0.3861	NA	NA	Lymph node	NA	NA	NA	29	PRAD	NA	NA	1	NA	Metastasis	Male	Matched	0.966667	NA	NA	NA	NA	NA	NA	NA	NA	NA	NA	NA	NA	NA	NA	NA	NA	NA	NA	NA	NA	65	NA	NA	NA
prad_p1000	SC_9075	SC_9075	prad_p1000:SC_9075	prad_p1000:SC_9075	0	NA	Prostate Cancer	Prostate Adenocarcinoma	0.007	NA	NA	Bone	NA	NA	NA	9	PRAD	NA	NA	1	NA	Metastasis	Male	Matched	0.3	NA	NA	NA	NA	NA	NA	NA	NA	NA	NA	NA	NA	NA	NA	NA	NA	NA	NA	NA	NA	67	NA	NA	NA
prad_p1000	SC_9076	SC_9076	prad_p1000:SC_9076	prad_p1000:SC_9076	0	NA	Prostate Cancer	Prostate Adenocarcinoma	0.4294	NA	NA	Lymph node	NA	NA	NA	221	PRAD	NA	NA	1	NA	Metastasis	Male	Matched	7.36667	NA	NA	NA	NA	NA	NA	NA	NA	NA	NA	NA	NA	NA	NA	NA	NA	NA	NA	NA	NA	71	NA	NA	NA
prad_p1000	SC_9079	SC_9079	prad_p1000:SC_9079	prad_p1000:SC_9079	0	NA	Prostate Cancer	Prostate Adenocarcinoma	0.0211	NA	NA	Bone	NA	NA	NA	4	PRAD	NA	NA	1	NA	Metastasis	Male	Matched	0.133333	NA	NA	NA	NA	NA	NA	NA	NA	NA	NA	NA	NA	NA	NA	NA	NA	NA	NA	NA	NA	56	NA	NA	NA
prad_p1000	SC_9080	SC_9080	prad_p1000:SC_9080	prad_p1000:SC_9080	0	NA	Prostate Cancer	Prostate Adenocarcinoma	0.3679	NA	NA	Lymph node	NA	NA	NA	61	PRAD	NA	NA	1	NA	Metastasis	Male	Matched	2.03333	NA	NA	NA	NA	NA	NA	NA	NA	NA	NA	NA	NA	NA	NA	NA	NA	NA	NA	NA	NA	76	NA	NA	NA
prad_p1000	SC_9081	SC_9081	prad_p1000:SC_9081	prad_p1000:SC_9081	0	NA	Prostate Cancer	Prostate Adenocarcinoma	0.0492	NA	NA	Lymph node	NA	NA	NA	630	PRAD	NA	NA	1	NA	Metastasis	Male	Matched	21	NA	NA	NA	NA	NA	NA	NA	NA	NA	NA	NA	NA	NA	NA	NA	NA	NA	NA	NA	NA	69	NA	NA	NA
prad_p1000	SC_9082	SC_9082	prad_p1000:SC_9082	prad_p1000:SC_9082	0	NA	Prostate Cancer	Prostate Adenocarcinoma	0.1742	NA	NA	Bone	NA	NA	NA	73	PRAD	NA	NA	1	NA	Metastasis	Male	Matched	2.43333	NA	NA	NA	NA	NA	NA	NA	NA	NA	NA	NA	NA	NA	NA	NA	NA	NA	NA	NA	NA	67	NA	NA	NA
prad_p1000	SC_9083	SC_9083	prad_p1000:SC_9083	prad_p1000:SC_9083	0	NA	Prostate Cancer	Prostate Adenocarcinoma	0.6176	NA	NA	Bone	NA	NA	NA	210	PRAD	NA	NA	1	NA	Metastasis	Male	Matched	7	NA	NA	NA	NA	NA	NA	NA	NA	NA	NA	NA	NA	NA	NA	NA	NA	NA	NA	NA	NA	62	NA	NA	NA
prad_p1000	SC_9084	SC_9084	prad_p1000:SC_9084	prad_p1000:SC_9084	0	NA	Prostate Cancer	Prostate Adenocarcinoma	0.5923	NA	NA	Lymph node	NA	NA	NA	37	PRAD	NA	NA	1	NA	Metastasis	Male	Matched	1.23333	NA	NA	NA	NA	NA	NA	NA	NA	NA	NA	NA	NA	NA	NA	NA	NA	NA	NA	NA	NA	62	NA	NA	NA
prad_p1000	SC_9085	SC_9085	prad_p1000:SC_9085	prad_p1000:SC_9085	0	NA	Prostate Cancer	Prostate Adenocarcinoma	0.0064	NA	NA	Bone	NA	NA	NA	11	PRAD	NA	NA	1	NA	Metastasis	Male	Matched	0.366667	NA	NA	NA	NA	NA	NA	NA	NA	NA	NA	NA	NA	NA	NA	NA	NA	NA	NA	NA	NA	64	NA	NA	NA
prad_p1000	SC_9086	SC_9086	prad_p1000:SC_9086	prad_p1000:SC_9086	0	NA	Prostate Cancer	Prostate Adenocarcinoma	0.3779	NA	NA	Bone	NA	NA	NA	49	PRAD	NA	NA	1	NA	Metastasis	Male	Matched	1.63333	NA	NA	NA	NA	NA	NA	NA	NA	NA	NA	NA	NA	NA	NA	NA	NA	NA	NA	NA	NA	72	NA	NA	NA
prad_p1000	SC_9087	SC_9087	prad_p1000:SC_9087	prad_p1000:SC_9087	0	NA	Prostate Cancer	Prostate Adenocarcinoma	0.0129	NA	NA	Bone	NA	NA	NA	11	PRAD	NA	NA	1	NA	Metastasis	Male	Matched	0.366667	NA	NA	NA	NA	NA	NA	NA	NA	NA	NA	NA	NA	NA	NA	NA	NA	NA	NA	NA	NA	69	NA	NA	NA
prad_p1000	SC_9088	SC_9088	prad_p1000:SC_9088	prad_p1000:SC_9088	0	NA	Prostate Cancer	Prostate Adenocarcinoma	0.0067	NA	NA	Bone	NA	NA	NA	33	PRAD	NA	NA	1	NA	Metastasis	Male	Matched	1.1	NA	NA	NA	NA	NA	NA	NA	NA	NA	NA	NA	NA	NA	NA	NA	NA	NA	NA	NA	NA	76	NA	NA	NA
prad_p1000	SC_9090	SC_9090	prad_p1000:SC_9090	prad_p1000:SC_9090	0	NA	Prostate Cancer	Prostate Adenocarcinoma	0.2614	NA	NA	Bone	NA	NA	NA	118	PRAD	NA	NA	1	NA	Metastasis	Male	Matched	3.93333	NA	NA	NA	NA	NA	NA	NA	NA	NA	NA	NA	NA	NA	NA	NA	NA	NA	NA	NA	NA	73	NA	NA	NA
prad_p1000	SC_9091	SC_9091	prad_p1000:SC_9091	prad_p1000:SC_9091	0	NA	Prostate Cancer	Prostate Adenocarcinoma	0.0781	NA	NA	Bone	NA	NA	NA	43	PRAD	NA	NA	1	NA	Metastasis	Male	Matched	1.43333	NA	NA	NA	NA	NA	NA	NA	NA	NA	NA	NA	NA	NA	NA	NA	NA	NA	NA	NA	NA	60	NA	NA	NA
prad_p1000	SC_9092	SC_9092	prad_p1000:SC_9092	prad_p1000:SC_9092	0	NA	Prostate Cancer	Prostate Adenocarcinoma	0.3102	NA	NA	Bone	NA	NA	NA	114	PRAD	NA	NA	1	NA	Metastasis	Male	Matched	3.8	NA	NA	NA	NA	NA	NA	NA	NA	NA	NA	NA	NA	NA	NA	NA	NA	NA	NA	NA	NA	76	NA	NA	NA
prad_p1000	SC_9093	SC_9093	prad_p1000:SC_9093	prad_p1000:SC_9093	0	NA	Prostate Cancer	Prostate Adenocarcinoma	0.6721	NA	NA	Soft Tissue	NA	NA	NA	131	PRAD	NA	NA	1	NA	Metastasis	Male	Matched	4.36667	NA	NA	NA	NA	NA	NA	NA	NA	NA	NA	NA	NA	NA	NA	NA	NA	NA	NA	NA	NA	56	NA	NA	NA
prad_p1000	SC_9094	SC_9094	prad_p1000:SC_9094	prad_p1000:SC_9094	0	NA	Prostate Cancer	Prostate Adenocarcinoma	0.491	NA	NA	Bone	NA	NA	NA	119	PRAD	NA	NA	1	NA	Metastasis	Male	Matched	3.96667	NA	NA	NA	NA	NA	NA	NA	NA	NA	NA	NA	NA	NA	NA	NA	NA	NA	NA	NA	NA	61	NA	NA	NA
prad_p1000	SC_9096	SC_9096	prad_p1000:SC_9096	prad_p1000:SC_9096	0	NA	Prostate Cancer	Prostate Adenocarcinoma	0.568	NA	NA	Bone	NA	NA	NA	150	PRAD	NA	NA	1	NA	Metastasis	Male	Matched	5	NA	NA	NA	NA	NA	NA	NA	NA	NA	NA	NA	NA	NA	NA	NA	NA	NA	NA	NA	NA	82	NA	NA	NA
prad_p1000	SC_9097	SC_9097	prad_p1000:SC_9097	prad_p1000:SC_9097	0	NA	Prostate Cancer	Prostate Adenocarcinoma	0.6451	NA	NA	Lymph node	NA	NA	NA	136	PRAD	NA	NA	1	NA	Metastasis	Male	Matched	4.53333	NA	NA	NA	NA	NA	NA	NA	NA	NA	NA	NA	NA	NA	NA	NA	NA	NA	NA	NA	NA	70	NA	NA	NA
prad_p1000	SC_9099	SC_9099	prad_p1000:SC_9099	prad_p1000:SC_9099	0	NA	Prostate Cancer	Prostate Adenocarcinoma	0.5915	NA	NA	Lymph node	NA	NA	NA	116	PRAD	NA	NA	1	NA	Metastasis	Male	Matched	3.86667	NA	NA	NA	NA	NA	NA	NA	NA	NA	NA	NA	NA	NA	NA	NA	NA	NA	NA	NA	NA	79	NA	NA	NA
prad_p1000	SC_9100	SC_9100	prad_p1000:SC_9100	prad_p1000:SC_9100	0	NA	Prostate Cancer	Prostate Adenocarcinoma	0.0431	NA	NA	Bone	NA	NA	NA	171	PRAD	NA	NA	1	NA	Metastasis	Male	Matched	5.73333	NA	NA	NA	NA	NA	NA	NA	NA	NA	NA	NA	NA	NA	NA	NA	NA	NA	NA	NA	NA	74	NA	NA	NA
prad_p1000	SC_9103	SC_9103	prad_p1000:SC_9103	prad_p1000:SC_9103	0	NA	Prostate Cancer	Prostate Adenocarcinoma	0.4395	NA	NA	Bone	NA	NA	NA	101	PRAD	NA	NA	1	NA	Metastasis	Male	Matched	3.36667	NA	NA	NA	NA	NA	NA	NA	NA	NA	NA	NA	NA	NA	NA	NA	NA	NA	NA	NA	NA	68	NA	NA	NA
prad_p1000	SC_9104	SC_9104	prad_p1000:SC_9104	prad_p1000:SC_9104	0	NA	Prostate Cancer	Prostate Adenocarcinoma	0.2577	NA	NA	Lymph node	NA	NA	NA	104	PRAD	NA	NA	1	NA	Metastasis	Male	Matched	3.46667	NA	NA	NA	NA	NA	NA	NA	NA	NA	NA	NA	NA	NA	NA	NA	NA	NA	NA	NA	NA	70	NA	NA	NA
prad_p1000	SC_9105	SC_9105	prad_p1000:SC_9105	prad_p1000:SC_9105	0	NA	Prostate Cancer	Prostate Adenocarcinoma	0.0649	NA	NA	Soft Tissue	NA	NA	NA	109	PRAD	NA	NA	1	NA	Metastasis	Male	Matched	3.63333	NA	NA	NA	NA	NA	NA	NA	NA	NA	NA	NA	NA	NA	NA	NA	NA	NA	NA	NA	NA	73	NA	NA	NA
prad_p1000	SC_9107	SC_9107	prad_p1000:SC_9107	prad_p1000:SC_9107	0	NA	Prostate Cancer	Prostate Adenocarcinoma	0.685	NA	NA	Liver	NA	NA	NA	123	PRAD	NA	NA	1	NA	Metastasis	Male	Matched	4.1	NA	NA	NA	NA	NA	NA	NA	NA	NA	NA	NA	NA	NA	NA	NA	NA	NA	NA	NA	NA	65	NA	NA	NA
prad_p1000	SC_9109	SC_9109	prad_p1000:SC_9109	prad_p1000:SC_9109	0	NA	Prostate Cancer	Prostate Adenocarcinoma	0.3786	NA	NA	Lymph node	NA	NA	NA	111	PRAD	NA	NA	1	NA	Metastasis	Male	Matched	3.7	NA	NA	NA	NA	NA	NA	NA	NA	NA	NA	NA	NA	NA	NA	NA	NA	NA	NA	NA	NA	55	NA	NA	NA
prad_p1000	SC_9114	SC_9114	prad_p1000:SC_9114	prad_p1000:SC_9114	0	NA	Prostate Cancer	Prostate Adenocarcinoma	0.0414	NA	NA	Bone	NA	NA	NA	119	PRAD	NA	NA	1	NA	Metastasis	Male	Matched	3.96667	NA	NA	NA	NA	NA	NA	NA	NA	NA	NA	NA	NA	NA	NA	NA	NA	NA	NA	NA	NA	68	NA	NA	NA
prad_p1000	SC_9118	SC_9118	prad_p1000:SC_9118	prad_p1000:SC_9118	0	NA	Prostate Cancer	Prostate Adenocarcinoma	0.4279	NA	NA	Lymph node	NA	NA	NA	141	PRAD	NA	NA	1	NA	Metastasis	Male	Matched	4.7	NA	NA	NA	NA	NA	NA	NA	NA	NA	NA	NA	NA	NA	NA	NA	NA	NA	NA	NA	NA	58	NA	NA	NA
prad_p1000	SC_9121	SC_9121	prad_p1000:SC_9121	prad_p1000:SC_9121	0	NA	Prostate Cancer	Prostate Adenocarcinoma	0.3862	NA	NA	Bone	NA	NA	NA	115	PRAD	NA	NA	1	NA	Metastasis	Male	Matched	3.83333	NA	NA	NA	NA	NA	NA	NA	NA	NA	NA	NA	NA	NA	NA	NA	NA	NA	NA	NA	NA	57	NA	NA	NA
prad_p1000	SC_9123	SC_9123	prad_p1000:SC_9123	prad_p1000:SC_9123	0	NA	Prostate Cancer	Prostate Adenocarcinoma	0.2212	NA	NA	Lymph node	NA	NA	NA	156	PRAD	NA	NA	1	NA	Metastasis	Male	Matched	5.2	NA	NA	NA	NA	NA	NA	NA	NA	NA	NA	NA	NA	NA	NA	NA	NA	NA	NA	NA	NA	68	NA	NA	NA
prad_p1000	SC_9124	SC_9124	prad_p1000:SC_9124	prad_p1000:SC_9124	0	NA	Prostate Cancer	Prostate Adenocarcinoma	0.5193	NA	NA	Lymph node	NA	NA	NA	101	PRAD	NA	NA	1	NA	Metastasis	Male	Matched	3.36667	NA	NA	NA	NA	NA	NA	NA	NA	NA	NA	NA	NA	NA	NA	NA	NA	NA	NA	NA	NA	69	NA	NA	NA
prad_p1000	SC_9126	SC_9126	prad_p1000:SC_9126	prad_p1000:SC_9126	0	NA	Prostate Cancer	Prostate Adenocarcinoma	0.4054	NA	NA	Lymph node	NA	NA	NA	114	PRAD	NA	NA	1	NA	Metastasis	Male	Matched	3.8	NA	NA	NA	NA	NA	NA	NA	NA	NA	NA	NA	NA	NA	NA	NA	NA	NA	NA	NA	NA	51	NA	NA	NA
prad_p1000	SC_9127	SC_9127	prad_p1000:SC_9127	prad_p1000:SC_9127	0	NA	Prostate Cancer	Prostate Adenocarcinoma	0.0052	NA	NA	Bone	NA	NA	NA	67	PRAD	NA	NA	1	NA	Metastasis	Male	Matched	2.23333	NA	NA	NA	NA	NA	NA	NA	NA	NA	NA	NA	NA	NA	NA	NA	NA	NA	NA	NA	NA	70	NA	NA	NA
prad_p1000	SC_9128	SC_9128	prad_p1000:SC_9128	prad_p1000:SC_9128	0	NA	Prostate Cancer	Prostate Adenocarcinoma	0.0075	NA	NA	Bone	NA	NA	NA	49	PRAD	NA	NA	1	NA	Metastasis	Male	Matched	1.63333	NA	NA	NA	NA	NA	NA	NA	NA	NA	NA	NA	NA	NA	NA	NA	NA	NA	NA	NA	NA	62	NA	NA	NA
prad_p1000	SC_9129	SC_9129	prad_p1000:SC_9129	prad_p1000:SC_9129	0	NA	Prostate Cancer	Prostate Adenocarcinoma	0.022	NA	NA	Lymph node	NA	NA	NA	131	PRAD	NA	NA	1	NA	Metastasis	Male	Matched	4.36667	NA	NA	NA	NA	NA	NA	NA	NA	NA	NA	NA	NA	NA	NA	NA	NA	NA	NA	NA	NA	67	NA	NA	NA
prad_p1000	SC_9130	SC_9130	prad_p1000:SC_9130	prad_p1000:SC_9130	0	NA	Prostate Cancer	Prostate Adenocarcinoma	0.011	NA	NA	Pelvic Mass	NA	NA	NA	973	PRAD	NA	NA	1	NA	Metastasis	Male	Matched	32.4667	NA	NA	NA	NA	NA	NA	NA	NA	NA	NA	NA	NA	NA	NA	NA	NA	NA	NA	NA	NA	69	NA	NA	NA
prad_p1000	SC_9132	SC_9132	prad_p1000:SC_9132	prad_p1000:SC_9132	0	NA	Prostate Cancer	Prostate Adenocarcinoma	0.5766	NA	NA	Lymph node	NA	NA	NA	138	PRAD	NA	NA	1	NA	Metastasis	Male	Matched	4.63333	NA	NA	NA	NA	NA	NA	NA	NA	NA	NA	NA	NA	NA	NA	NA	NA	NA	NA	NA	NA	66	NA	NA	NA
prad_p1000	SC_9134	SC_9134	prad_p1000:SC_9134	prad_p1000:SC_9134	0	NA	Prostate Cancer	Prostate Adenocarcinoma	0.0141	NA	NA	Bone	NA	NA	NA	36	PRAD	NA	NA	1	NA	Metastasis	Male	Matched	1.2	NA	NA	NA	NA	NA	NA	NA	NA	NA	NA	NA	NA	NA	NA	NA	NA	NA	NA	NA	NA	79	NA	NA	NA
prad_p1000	SC_9136	SC_9136	prad_p1000:SC_9136	prad_p1000:SC_9136	0	NA	Prostate Cancer	Prostate Adenocarcinoma	0.2148	NA	NA	Bone	NA	NA	NA	142	PRAD	NA	NA	1	NA	Metastasis	Male	Matched	4.73333	NA	NA	NA	NA	NA	NA	NA	NA	NA	NA	NA	NA	NA	NA	NA	NA	NA	NA	NA	NA	79	NA	NA	NA
prad_p1000	SC_9137	SC_9137	prad_p1000:SC_9137	prad_p1000:SC_9137	0	NA	Prostate Cancer	Prostate Adenocarcinoma	0.2383	NA	NA	Bone	NA	NA	NA	159	PRAD	NA	NA	1	NA	Metastasis	Male	Matched	5.3	NA	NA	NA	NA	NA	NA	NA	NA	NA	NA	NA	NA	NA	NA	NA	NA	NA	NA	NA	NA	70	NA	NA	NA
prad_p1000	SC_9138	SC_9138	prad_p1000:SC_9138	prad_p1000:SC_9138	0	NA	Prostate Cancer	Prostate Adenocarcinoma	0.0012	NA	NA	Lymph node	NA	NA	NA	114	PRAD	NA	NA	1	NA	Metastasis	Male	Matched	3.8	NA	NA	NA	NA	NA	NA	NA	NA	NA	NA	NA	NA	NA	NA	NA	NA	NA	NA	NA	NA	52	NA	NA	NA
prad_p1000	SC_9139	SC_9139	prad_p1000:SC_9139	prad_p1000:SC_9139	0	NA	Prostate Cancer	Prostate Adenocarcinoma	0.0092	NA	NA	Groin	NA	NA	NA	83	PRAD	NA	NA	1	NA	Metastasis	Male	Matched	2.76667	NA	NA	NA	NA	NA	NA	NA	NA	NA	NA	NA	NA	NA	NA	NA	NA	NA	NA	NA	NA	NA	NA	NA	NA
prad_p1000	SC_9140	SC_9140	prad_p1000:SC_9140	prad_p1000:SC_9140	0	NA	Prostate Cancer	Prostate Adenocarcinoma	0.414	NA	NA	Liver	NA	NA	NA	247	PRAD	NA	NA	1	NA	Metastasis	Male	Matched	8.23333	NA	NA	NA	NA	NA	NA	NA	NA	NA	NA	NA	NA	NA	NA	NA	NA	NA	NA	NA	NA	NA	NA	NA	NA
prad_p1000	SC_9141	SC_9141	prad_p1000:SC_9141	prad_p1000:SC_9141	0	NA	Prostate Cancer	Prostate Adenocarcinoma	0.425	NA	NA	Lymph node	NA	NA	NA	117	PRAD	NA	NA	1	NA	Metastasis	Male	Matched	3.9	NA	NA	NA	NA	NA	NA	NA	NA	NA	NA	NA	NA	NA	NA	NA	NA	NA	NA	NA	NA	NA	NA	NA	NA
prad_p1000	SC_9142	SC_9142	prad_p1000:SC_9142	prad_p1000:SC_9142	0	NA	Prostate Cancer	Prostate Adenocarcinoma	0.0123	NA	NA	Lymph node	NA	NA	NA	148	PRAD	NA	NA	1	NA	Metastasis	Male	Matched	4.93333	NA	NA	NA	NA	NA	NA	NA	NA	NA	NA	NA	NA	NA	NA	NA	NA	NA	NA	NA	NA	60	NA	NA	NA
prad_p1000	SC_9144	SC_9144	prad_p1000:SC_9144	prad_p1000:SC_9144	0	NA	Prostate Cancer	Prostate Adenocarcinoma	0.2537	NA	NA	Bone	NA	NA	NA	158	PRAD	NA	NA	1	NA	Metastasis	Male	Matched	5.26667	NA	NA	NA	NA	NA	NA	NA	NA	NA	NA	NA	NA	NA	NA	NA	NA	NA	NA	NA	NA	69	NA	NA	NA
prad_p1000	SC_9145	SC_9145	prad_p1000:SC_9145	prad_p1000:SC_9145	0	NA	Prostate Cancer	Prostate Adenocarcinoma	0.2954	NA	NA	Liver	NA	NA	NA	207	PRAD	NA	NA	1	NA	Metastasis	Male	Matched	6.9	NA	NA	NA	NA	NA	NA	NA	NA	NA	NA	NA	NA	NA	NA	NA	NA	NA	NA	NA	NA	75	NA	NA	NA
prad_p1000	SC_9148	SC_9148	prad_p1000:SC_9148	prad_p1000:SC_9148	0	NA	Prostate Cancer	Prostate Adenocarcinoma	0.3438	NA	NA	Lymph node	NA	NA	NA	138	PRAD	NA	NA	1	NA	Metastasis	Male	Matched	4.6	NA	NA	NA	NA	NA	NA	NA	NA	NA	NA	NA	NA	NA	NA	NA	NA	NA	NA	NA	NA	83	NA	NA	NA
prad_p1000	SC_9150	SC_9150	prad_p1000:SC_9150	prad_p1000:SC_9150	0	NA	Prostate Cancer	Prostate Adenocarcinoma	0.3085	NA	NA	Bone	NA	NA	NA	195	PRAD	NA	NA	1	NA	Metastasis	Male	Matched	6.5	NA	NA	NA	NA	NA	NA	NA	NA	NA	NA	NA	NA	NA	NA	NA	NA	NA	NA	NA	NA	55	NA	NA	NA
prad_p1000	SC_9151	SC_9151	prad_p1000:SC_9151	prad_p1000:SC_9151	0	NA	Prostate Cancer	Prostate Adenocarcinoma	0.2	NA	NA	Bone	NA	NA	NA	103	PRAD	NA	NA	1	NA	Metastasis	Male	Matched	3.43333	NA	NA	NA	NA	NA	NA	NA	NA	NA	NA	NA	NA	NA	NA	NA	NA	NA	NA	NA	NA	58	NA	NA	NA
prad_p1000	SC_9153	SC_9153	prad_p1000:SC_9153	prad_p1000:SC_9153	0	NA	Prostate Cancer	Prostate Adenocarcinoma	0.5546	NA	NA	Liver	NA	NA	NA	80	PRAD	NA	NA	1	NA	Metastasis	Male	Matched	2.66667	NA	NA	NA	NA	NA	NA	NA	NA	NA	NA	NA	NA	NA	NA	NA	NA	NA	NA	NA	NA	72	NA	NA	NA
prad_p1000	SC_9156	SC_9156	prad_p1000:SC_9156	prad_p1000:SC_9156	0	NA	Prostate Cancer	Prostate Adenocarcinoma	0.6309	NA	NA	Pertioneum	NA	NA	NA	122	PRAD	NA	NA	1	NA	Metastasis	Male	Matched	4.06667	NA	NA	NA	NA	NA	NA	NA	NA	NA	NA	NA	NA	NA	NA	NA	NA	NA	NA	NA	NA	60	NA	NA	NA
prad_p1000	SC_9158	SC_9158	prad_p1000:SC_9158	prad_p1000:SC_9158	0	NA	Prostate Cancer	Prostate Adenocarcinoma	0.6597	NA	NA	Bone	NA	NA	NA	103	PRAD	NA	NA	1	NA	Metastasis	Male	Matched	3.43333	NA	NA	NA	NA	NA	NA	NA	NA	NA	NA	NA	NA	NA	NA	NA	NA	NA	NA	NA	NA	73	NA	NA	NA
prad_p1000	SC_9162	SC_9162	prad_p1000:SC_9162	prad_p1000:SC_9162	0	NA	Prostate Cancer	Prostate Adenocarcinoma	0.624	NA	NA	Liver	NA	NA	NA	111	PRAD	NA	NA	1	NA	Metastasis	Male	Matched	3.7	NA	NA	NA	NA	NA	NA	NA	NA	NA	NA	NA	NA	NA	NA	NA	NA	NA	NA	NA	NA	76	NA	NA	NA
prad_p1000	SC_9163	SC_9163	prad_p1000:SC_9163	prad_p1000:SC_9163	0	NA	Prostate Cancer	Prostate Adenocarcinoma	0.1201	NA	NA	Lymph node	NA	NA	NA	1209	PRAD	NA	NA	1	NA	Metastasis	Male	Matched	40.3667	NA	NA	NA	NA	NA	NA	NA	NA	NA	NA	NA	NA	NA	NA	NA	NA	NA	NA	NA	NA	70	NA	NA	NA
prad_p1000	SC_9165	SC_9165	prad_p1000:SC_9165	prad_p1000:SC_9165	0	NA	Prostate Cancer	Prostate Adenocarcinoma	0.0409	NA	NA	Lymph node	NA	NA	NA	196	PRAD	NA	NA	1	NA	Metastasis	Male	Matched	6.53333	NA	NA	NA	NA	NA	NA	NA	NA	NA	NA	NA	NA	NA	NA	NA	NA	NA	NA	NA	NA	67	NA	NA	NA
prad_p1000	SC_9171	SC_9171	prad_p1000:SC_9171	prad_p1000:SC_9171	0	NA	Prostate Cancer	Prostate Adenocarcinoma	0.2084	NA	NA	Bone	NA	NA	NA	79	PRAD	NA	NA	1	NA	Metastasis	Male	Matched	2.63333	NA	NA	NA	NA	NA	NA	NA	NA	NA	NA	NA	NA	NA	NA	NA	NA	NA	NA	NA	NA	72	NA	NA	NA
prad_p1000	SC_9172	SC_9172	prad_p1000:SC_9172	prad_p1000:SC_9172	0	NA	Prostate Cancer	Prostate Adenocarcinoma	0.2476	NA	NA	Bone	NA	NA	NA	132	PRAD	NA	NA	1	NA	Metastasis	Male	Matched	4.43333	NA	NA	NA	NA	NA	NA	NA	NA	NA	NA	NA	NA	NA	NA	NA	NA	NA	NA	NA	NA	68	NA	NA	NA
prad_p1000	SC_9173	SC_9173	prad_p1000:SC_9173	prad_p1000:SC_9173	0	NA	Prostate Cancer	Prostate Adenocarcinoma	0.5037	NA	NA	Bone	NA	NA	NA	123	PRAD	NA	NA	1	NA	Metastasis	Male	Matched	4.1	NA	NA	NA	NA	NA	NA	NA	NA	NA	NA	NA	NA	NA	NA	NA	NA	NA	NA	NA	NA	73	NA	NA	NA
prad_p1000	SI_9157	SI_9157	prad_p1000:SI_9157	prad_p1000:SI_9157	0	NA	Prostate Cancer	Prostate Adenocarcinoma	0.1385	NA	NA	Bone	NA	NA	NA	115	PRAD	NA	NA	1	NA	Metastasis	Male	Matched	3.83333	NA	NA	NA	NA	NA	NA	NA	NA	NA	NA	NA	NA	NA	NA	NA	NA	NA	NA	NA	NA	78	NA	NA	NA
prad_p1000	TP_2001	TP_2001	prad_p1000:TP_2001	prad_p1000:TP_2001	0	NA	Prostate Cancer	Prostate Adenocarcinoma	0.4731	NA	NA	Lymph node	NA	NA	NA	33	PRAD	NA	NA	1	NA	Metastasis	Male	Matched	1.1	NA	NA	NA	NA	NA	NA	NA	NA	NA	NA	NA	NA	NA	NA	NA	NA	NA	NA	NA	NA	70	NA	NA	NA
prad_p1000	TP_2010	TP_2010	prad_p1000:TP_2010	prad_p1000:TP_2010	0	NA	Prostate Cancer	Prostate Adenocarcinoma	0.3026	NA	NA	Lymph node	NA	NA	NA	53	PRAD	NA	NA	1	NA	Metastasis	Male	Matched	1.76667	NA	NA	NA	NA	NA	NA	NA	NA	NA	NA	NA	NA	NA	NA	NA	NA	NA	NA	NA	NA	64	NA	NA	NA
prad_p1000	TP_2020	TP_2020	prad_p1000:TP_2020	prad_p1000:TP_2020	0	NA	Prostate Cancer	Prostate Adenocarcinoma	0.2056	NA	NA	Bone	NA	NA	NA	52	PRAD	NA	NA	1	NA	Metastasis	Male	Matched	1.73333	NA	NA	NA	NA	NA	NA	NA	NA	NA	NA	NA	NA	NA	NA	NA	NA	NA	NA	NA	NA	55	NA	NA	NA
prad_p1000	TP_2032	TP_2032	prad_p1000:TP_2032	prad_p1000:TP_2032	0	NA	Prostate Cancer	Prostate Adenocarcinoma	0.237	NA	NA	Lymph node	NA	NA	NA	47	PRAD	NA	NA	1	NA	Metastasis	Male	Matched	1.56667	NA	NA	NA	NA	NA	NA	NA	NA	NA	NA	NA	NA	NA	NA	NA	NA	NA	NA	NA	NA	74	NA	NA	NA
prad_p1000	TP_2034	TP_2034	prad_p1000:TP_2034	prad_p1000:TP_2034	0	NA	Prostate Cancer	Prostate Adenocarcinoma	0.2391	NA	NA	Bone	NA	NA	NA	45	PRAD	NA	NA	1	NA	Metastasis	Male	Matched	1.5	NA	NA	NA	NA	NA	NA	NA	NA	NA	NA	NA	NA	NA	NA	NA	NA	NA	NA	NA	NA	NA	NA	NA	NA
prad_p1000	TP_2054	TP_2054	prad_p1000:TP_2054	prad_p1000:TP_2054	0	NA	Prostate Cancer	Prostate Adenocarcinoma	0.362	NA	NA	Lymph node	NA	NA	NA	139	PRAD	NA	NA	1	NA	Metastasis	Male	Matched	4.63333	NA	NA	NA	NA	NA	NA	NA	NA	NA	NA	NA	NA	NA	NA	NA	NA	NA	NA	NA	NA	70	NA	NA	NA
prad_p1000	TP_2060	TP_2060	prad_p1000:TP_2060	prad_p1000:TP_2060	0	NA	Prostate Cancer	Prostate Adenocarcinoma	0.0869	NA	NA	Lymph node	NA	NA	NA	117	PRAD	NA	NA	1	NA	Metastasis	Male	Matched	3.9	NA	NA	NA	NA	NA	NA	NA	NA	NA	NA	NA	NA	NA	NA	NA	NA	NA	NA	NA	NA	72	NA	NA	NA
prad_p1000	TP_2061	TP_2061	prad_p1000:TP_2061	prad_p1000:TP_2061	0	NA	Prostate Cancer	Prostate Adenocarcinoma	0.5905	NA	NA	Pelvic mass	NA	NA	NA	71	PRAD	NA	NA	1	NA	Metastasis	Male	Matched	2.36667	NA	NA	NA	NA	NA	NA	NA	NA	NA	NA	NA	NA	NA	NA	NA	NA	NA	NA	NA	NA	65	NA	NA	NA
prad_p1000	TP_2064	TP_2064	prad_p1000:TP_2064	prad_p1000:TP_2064	0	NA	Prostate Cancer	Prostate Adenocarcinoma	0.6098	NA	NA	Lymph node	NA	NA	NA	100	PRAD	NA	NA	1	NA	Metastasis	Male	Matched	3.33333	NA	NA	NA	NA	NA	NA	NA	NA	NA	NA	NA	NA	NA	NA	NA	NA	NA	NA	NA	NA	71	NA	NA	NA
prad_p1000	TP_2069	TP_2069	prad_p1000:TP_2069	prad_p1000:TP_2069	0	NA	Prostate Cancer	Prostate Adenocarcinoma	0.2471	NA	NA	Lymph node	NA	NA	NA	180	PRAD	NA	NA	1	NA	Metastasis	Male	Matched	6	NA	NA	NA	NA	NA	NA	NA	NA	NA	NA	NA	NA	NA	NA	NA	NA	NA	NA	NA	NA	66	NA	NA	NA
prad_p1000	TP_2077	TP_2077	prad_p1000:TP_2077	prad_p1000:TP_2077	0	NA	Prostate Cancer	Prostate Adenocarcinoma	0.1205	NA	NA	Lymph node	NA	NA	NA	70	PRAD	NA	NA	1	NA	Metastasis	Male	Matched	2.33333	NA	NA	NA	NA	NA	NA	NA	NA	NA	NA	NA	NA	NA	NA	NA	NA	NA	NA	NA	NA	68	NA	NA	NA
prad_p1000	TP_2078	TP_2078	prad_p1000:TP_2078	prad_p1000:TP_2078	0	NA	Prostate Cancer	Prostate Adenocarcinoma	0.6704	NA	NA	Lymph node	NA	NA	NA	137	PRAD	NA	NA	1	NA	Metastasis	Male	Matched	4.56667	NA	NA	NA	NA	NA	NA	NA	NA	NA	NA	NA	NA	NA	NA	NA	NA	NA	NA	NA	NA	86	NA	NA	NA
prad_p1000	TP_2079	TP_2079	prad_p1000:TP_2079	prad_p1000:TP_2079	0	NA	Prostate Cancer	Prostate Adenocarcinoma	0.3696	NA	NA	Bone	NA	NA	NA	70	PRAD	NA	NA	1	NA	Metastasis	Male	Matched	2.4	NA	NA	NA	NA	NA	NA	NA	NA	NA	NA	NA	NA	NA	NA	NA	NA	NA	NA	NA	NA	66	NA	NA	NA
prad_pik3r1_msk_2021	P-0000318	P-0000318-T01-IM3	prad_pik3r1_msk_2021:P-0000318-T01-IM3	prad_pik3r1_msk_2021:P-0000318	0	NA	Prostate Cancer	Prostate Adenocarcinoma	0.5589	IMPACT341	MSKCC	Liver	NA	1.67	Stable	3	PRAD	Prostate	Tumor	1	782	Metastasis	Male	Matched	0.1	60	NA	NA	NA	NA	NA	NA	NA	NA	NA	NA	NO	NA	NA	NA	PT REFUSED TO ANSWER	NA	NA	NA	NA	NA	NA	NA	NA
prad_pik3r1_msk_2021	P-0000373	P-0000373-T02-IM5	prad_pik3r1_msk_2021:P-0000373-T02-IM5	prad_pik3r1_msk_2021:P-0000373	0	NA	Prostate Cancer	Prostate Adenocarcinoma	0.6293	IMPACT410	MSKCC	Bone	NA	0.95	Stable	1	PRAD	Prostate	Tumor	1	865	Metastasis	Male	Matched	0.0333333	30	NA	NA	NA	NA	NA	NA	NA	NA	NA	NA	YES	NA	NA	NA	WHITE	NA	NA	NA	NA	NA	NA	NA	NA
prad_pik3r1_msk_2021	P-0000431	P-0000431-T01-IM3	prad_pik3r1_msk_2021:P-0000431-T01-IM3	prad_pik3r1_msk_2021:P-0000431	0	NA	Prostate Cancer	Prostate Adenocarcinoma	0.1985	IMPACT341	MSKCC	Lymph Node	NA	0.34	Stable	1	PRAD	Prostate	Tumor	1	530	Metastasis	Male	Matched	0.0333333	60	NA	NA	NA	NA	NA	NA	NA	NA	NA	NA	YES	NA	NA	NA	WHITE	NA	NA	NA	NA	NA	NA	NA	NA
prad_pik3r1_msk_2021	P-0000441	P-0000441-T01-IM3	prad_pik3r1_msk_2021:P-0000441-T01-IM3	prad_pik3r1_msk_2021:P-0000441	0	NA	Prostate Cancer	Prostate Adenocarcinoma	0.2243	IMPACT341	MSKCC	Lymph Node	NA	1.18	Stable	6	PRAD	Prostate	Tumor	1	734	Metastasis	Male	Matched	0.2	70	NA	NA	NA	NA	NA	NA	NA	NA	NA	NA	YES	NA	NA	NA	WHITE	NA	NA	NA	NA	NA	NA	NA	NA
prad_pik3r1_msk_2021	P-0000659	P-0000659-T01-IM3	prad_pik3r1_msk_2021:P-0000659-T01-IM3	prad_pik3r1_msk_2021:P-0000659	0	NA	Prostate Cancer	Prostate Adenocarcinoma	0.2003	IMPACT341	MSKCC	Lymph Node	MICROSATELLITE STABLE (MSS). See MSI note below.	0.84	Stable	4	PRAD	Prostate	Tumor	1	1267	Metastasis	Male	Matched	0.133333	60	NA	NA	NA	NA	NA	NA	NA	NA	NA	NA	NO	NA	NA	NA	WHITE	NA	NA	NA	NA	NA	NA	NA	NA
prad_pik3r1_msk_2021	P-0000935	P-0000935-T01-IM3	prad_pik3r1_msk_2021:P-0000935-T01-IM3	prad_pik3r1_msk_2021:P-0000935	0	NA	Prostate Cancer	Prostate Adenocarcinoma	0.3718	IMPACT341	MSKCC	Liver	MICROSATELLITE STABLE (MSS). See MSI note below.	1.37	Stable	1	PRAD	Prostate	Tumor	1	578	Metastasis	Male	Unmatched	0.0333333	30	NA	NA	NA	NA	NA	NA	NA	NA	NA	NA	NO	NA	NA	NA	WHITE	NA	NA	NA	NA	NA	NA	NA	NA
prad_pik3r1_msk_2021	P-0000966	P-0000966-T01-IM3	prad_pik3r1_msk_2021:P-0000966-T01-IM3	prad_pik3r1_msk_2021:P-0000966	0	NA	Prostate Cancer	Prostate Adenocarcinoma	0.1009	IMPACT341	MSKCC	Bone	NA	1.36	Stable	2	PRAD	Prostate	Tumor	1	260	Metastasis	Male	Matched	0.0666667	20	NA	NA	NA	NA	NA	NA	NA	NA	NA	NA	YES	NA	NA	NA	WHITE	NA	NA	NA	NA	NA	NA	NA	NA
prad_pik3r1_msk_2021	P-0001021	P-0001021-T01-IM3	prad_pik3r1_msk_2021:P-0001021-T01-IM3	prad_pik3r1_msk_2021:P-0001021	0	NA	Prostate Cancer	Prostate Adenocarcinoma	0.4944	IMPACT341	MSKCC	Lymph Node	NA	1.08	Stable	5	PRAD	Prostate	Tumor	1	1072	Metastasis	Male	Matched	0.166667	80	NA	NA	NA	NA	NA	NA	NA	NA	NA	NA	NO	NA	NA	NA	WHITE	NA	NA	NA	NA	NA	NA	NA	NA
prad_pik3r1_msk_2021	P-0001141	P-0001141-T01-IM3	prad_pik3r1_msk_2021:P-0001141-T01-IM3	prad_pik3r1_msk_2021:P-0001141	0	NA	Prostate Cancer	Prostate Adenocarcinoma	0.4983	IMPACT341	MSKCC	Liver	NA	1.23	Stable	3	PRAD	Prostate	Tumor	1	730	Metastasis	Male	Matched	0.1	40	NA	NA	NA	NA	NA	NA	NA	NA	NA	NA	NO	NA	NA	NA	PT REFUSED TO ANSWER	NA	NA	NA	NA	NA	NA	NA	NA
prad_pik3r1_msk_2021	P-0001204	P-0001204-T03-IM5	prad_pik3r1_msk_2021:P-0001204-T03-IM5	prad_pik3r1_msk_2021:P-0001204	0	NA	Prostate Cancer	Prostate Adenocarcinoma	0.6399	IMPACT410	MSKCC	Brain	NA	1.65	Stable	3	PRAD	Prostate	Tumor	1	827	Metastasis	Male	Matched	0.1	70	NA	NA	NA	NA	NA	NA	NA	NA	NA	NA	YES	NA	NA	NA	WHITE	NA	NA	NA	NA	NA	NA	NA	NA
prad_pik3r1_msk_2021	P-0001274	P-0001274-T01-IM3	prad_pik3r1_msk_2021:P-0001274-T01-IM3	prad_pik3r1_msk_2021:P-0001274	0	NA	Prostate Cancer	Prostate Adenocarcinoma	0.1097	IMPACT341	MSKCC	Lymph Node	NA	0.26	Stable	3	PRAD	Prostate	Tumor	1	731	Metastasis	Male	Matched	0.1	30	NA	NA	NA	NA	NA	NA	NA	NA	NA	NA	NO	NA	NA	NA	WHITE	NA	NA	NA	NA	NA	NA	NA	NA
prad_pik3r1_msk_2021	P-0001382	P-0001382-T01-IM3	prad_pik3r1_msk_2021:P-0001382-T01-IM3	prad_pik3r1_msk_2021:P-0001382	0	NA	Prostate Cancer	Prostate Adenocarcinoma	0.0027	IMPACT341	MSKCC	Lung	NA	0	Stable	3	PRAD	Prostate	Tumor	1	619	Metastasis	Male	Matched	0.1	15	NA	NA	NA	NA	NA	NA	NA	NA	NA	NA	YES	NA	NA	NA	WHITE	NA	NA	NA	NA	NA	NA	NA	NA
prad_pik3r1_msk_2021	P-0001426	P-0001426-T01-IM3	prad_pik3r1_msk_2021:P-0001426-T01-IM3	prad_pik3r1_msk_2021:P-0001426	0	NA	Prostate Cancer	Prostate Adenocarcinoma	0.3625	IMPACT341	MSKCC	Lymph Node	NA	0.95	Stable	12	PRAD	Prostate	Tumor	1	829	Metastasis	Male	Matched	0.4	70	NA	NA	NA	NA	NA	NA	NA	NA	NA	NA	NO	NA	NA	NA	WHITE	NA	NA	NA	NA	NA	NA	NA	NA
prad_pik3r1_msk_2021	P-0001445	P-0001445-T01-IM3	prad_pik3r1_msk_2021:P-0001445-T01-IM3	prad_pik3r1_msk_2021:P-0001445	0	NA	Prostate Cancer	Prostate Adenocarcinoma	0.5991	IMPACT341	MSKCC	Bone	MICROSATELLITE STABLE (MSS). See MSI note below.	0.87	Stable	3	PRAD	Prostate	Tumor	1	537	Metastasis	Male	Matched	0.1	15	NA	NA	NA	NA	NA	NA	NA	NA	NA	NA	NO	NA	NA	NA	WHITE	NA	NA	NA	NA	NA	NA	NA	NA
prad_pik3r1_msk_2021	P-0001684	P-0001684-T01-IM3	prad_pik3r1_msk_2021:P-0001684-T01-IM3	prad_pik3r1_msk_2021:P-0001684	0	NA	Prostate Cancer	Prostate Adenocarcinoma	0.1506	IMPACT341	MSKCC	Bone	NA	0.27	Stable	1	PRAD	Prostate	Tumor	1	194	Metastasis	Male	Matched	0.0333333	20	NA	NA	NA	NA	NA	NA	NA	NA	NA	NA	YES	NA	NA	NA	WHITE	NA	NA	NA	NA	NA	NA	NA	NA
prad_pik3r1_msk_2021	P-0001697	P-0001697-T02-IM3	prad_pik3r1_msk_2021:P-0001697-T02-IM3	prad_pik3r1_msk_2021:P-0001697	0	NA	Prostate Cancer	Prostate Adenocarcinoma	0.3458	IMPACT341	MSKCC	Bone	MICROSATELLITE STABLE (MSS). See MSI note below.	0.37	Stable	3	PRAD	Prostate	Tumor	1	247	Metastasis	Male	Matched	0.1	NA	NA	NA	NA	NA	NA	NA	NA	NA	NA	NA	NO	NA	NA	NA	WHITE	NA	NA	NA	NA	NA	NA	NA	NA
prad_pik3r1_msk_2021	P-0001698	P-0001698-T01-IM3	prad_pik3r1_msk_2021:P-0001698-T01-IM3	prad_pik3r1_msk_2021:P-0001698	0	NA	Prostate Cancer	Prostate Adenocarcinoma	0.5929	IMPACT341	MSKCC	Pelvis	NA	1.06	Stable	5	PRAD	Prostate	Tumor	1	792	Metastasis	Male	Matched	0.166667	60	NA	NA	NA	NA	NA	NA	NA	NA	NA	NA	NO	NA	NA	NA	WHITE	NA	NA	NA	NA	NA	NA	NA	NA
prad_pik3r1_msk_2021	P-0001884	P-0001884-T01-IM3	prad_pik3r1_msk_2021:P-0001884-T01-IM3	prad_pik3r1_msk_2021:P-0001884	0	NA	Prostate Cancer	Prostate Adenocarcinoma	0.1583	IMPACT341	MSKCC	Bone	NA	0	Stable	8	PRAD	Prostate	Tumor	1	682	Metastasis	Male	Matched	0.266667	15	NA	NA	NA	NA	NA	NA	NA	NA	NA	NA	YES	NA	NA	NA	WHITE	NA	NA	NA	NA	NA	NA	NA	NA
prad_pik3r1_msk_2021	P-0002303	P-0002303-T01-IM3	prad_pik3r1_msk_2021:P-0002303-T01-IM3	prad_pik3r1_msk_2021:P-0002303	0	NA	Prostate Cancer	Prostate Adenocarcinoma	0.23	IMPACT341	MSKCC	Lymph Node	NA	0.53	Stable	6	PRAD	Prostate	Tumor	1	773	Metastasis	Male	Unmatched	0.2	20	NA	NA	NA	NA	NA	NA	NA	NA	NA	NA	NO	NA	NA	NA	WHITE	NA	NA	NA	NA	NA	NA	NA	NA
prad_pik3r1_msk_2021	P-0002304	P-0002304-T01-IM3	prad_pik3r1_msk_2021:P-0002304-T01-IM3	prad_pik3r1_msk_2021:P-0002304	0	NA	Prostate Cancer	Prostate Adenocarcinoma	0.1486	IMPACT341	MSKCC	Testis	NA	0.43	Stable	5	PRAD	Prostate	Tumor	1	801	Metastasis	Male	Matched	0.166667	20	NA	NA	NA	NA	NA	NA	NA	NA	NA	NA	NO	NA	NA	NA	WHITE	NA	NA	NA	NA	NA	NA	NA	NA
prad_pik3r1_msk_2021	P-0002372	P-0002372-T02-IM6	prad_pik3r1_msk_2021:P-0002372-T02-IM6	prad_pik3r1_msk_2021:P-0002372	0	NA	Prostate Cancer	Prostate Adenocarcinoma	0.0361	IMPACT468	MSKCC	Lung	MICROSATELLITE STABLE (MSS). See MSI note below.	0.45	Stable	4	PRAD	Prostate	Tumor	1	563	Metastasis	Male	Matched	0.133333	60	NA	NA	NA	NA	NA	NA	NA	NA	NA	NA	YES	NA	NA	NA	WHITE	NA	NA	NA	NA	NA	NA	NA	NA
prad_pik3r1_msk_2021	P-0002375	P-0002375-T02-IM6	prad_pik3r1_msk_2021:P-0002375-T02-IM6	prad_pik3r1_msk_2021:P-0002375	0	NA	Prostate Cancer	Prostate Adenocarcinoma	0.119	IMPACT468	MSKCC	Muscle	MICROSATELLITE STABLE (MSS). See MSI note below.	0.05	Stable	8	PRAD	Prostate	Tumor	1	699	Metastasis	Male	Matched	0.266667	20	NA	NA	NA	NA	NA	NA	NA	NA	NA	NA	YES	NA	NA	NA	WHITE	NA	NA	NA	NA	NA	NA	NA	NA
prad_pik3r1_msk_2021	P-0002398	P-0002398-T01-IM3	prad_pik3r1_msk_2021:P-0002398-T01-IM3	prad_pik3r1_msk_2021:P-0002398	0	NA	Prostate Cancer	Prostate Adenocarcinoma	0.1729	IMPACT341	MSKCC	Lymph Node	MICROSATELLITE STABLE (MSS). See MSI note below.	0	Stable	3	PRAD	Prostate	Tumor	1	659	Metastasis	Male	Matched	0.1	60	NA	NA	NA	NA	NA	NA	NA	NA	NA	NA	YES	NA	NA	NA	WHITE	NA	NA	NA	NA	NA	NA	NA	NA
prad_pik3r1_msk_2021	P-0002516	P-0002516-T01-IM3	prad_pik3r1_msk_2021:P-0002516-T01-IM3	prad_pik3r1_msk_2021:P-0002516	0	NA	Prostate Cancer	Prostate Adenocarcinoma	0.6124	IMPACT341	MSKCC	Lymph Node	NA	-1	Do not report	1	PRAD	Prostate	Tumor	1	1039	Metastasis	Male	Unmatched	0.0333333	NA	NA	NA	NA	NA	NA	NA	NA	NA	NA	NA	YES	NA	NA	NA	WHITE	NA	NA	NA	NA	NA	NA	NA	NA
prad_pik3r1_msk_2021	P-0002564	P-0002564-T01-IM3	prad_pik3r1_msk_2021:P-0002564-T01-IM3	prad_pik3r1_msk_2021:P-0002564	0	NA	Prostate Cancer	Prostate Adenocarcinoma	0.2223	IMPACT341	MSKCC	Lymph Node	NA	0.29	Stable	1	PRAD	Prostate	Tumor	1	468	Metastasis	Male	Matched	0.0333333	50	NA	NA	NA	NA	NA	NA	NA	NA	NA	NA	NO	NA	NA	NA	WHITE	NA	NA	NA	NA	NA	NA	NA	NA
prad_pik3r1_msk_2021	P-0002612	P-0002612-T01-IM3	prad_pik3r1_msk_2021:P-0002612-T01-IM3	prad_pik3r1_msk_2021:P-0002612	0	NA	Prostate Cancer	Prostate Adenocarcinoma	0.1063	IMPACT341	MSKCC	Lymph Node	MICROSATELLITE STABLE (MSS). See MSI note below.	0	Stable	NA	PRAD	Prostate	Tumor	1	511	Metastasis	Male	Matched	0	NA	NA	NA	NA	NA	NA	NA	NA	NA	NA	NA	YES	NA	NA	NA	WHITE	NA	NA	NA	NA	NA	NA	NA	NA
prad_pik3r1_msk_2021	P-0002740	P-0002740-T01-IM3	prad_pik3r1_msk_2021:P-0002740-T01-IM3	prad_pik3r1_msk_2021:P-0002740	0	NA	Prostate Cancer	Prostate Adenocarcinoma	0.0071	IMPACT341	MSKCC	Lymph Node	NA	0.86	Stable	4	PRAD	Prostate	Tumor	1	271	Metastasis	Male	Matched	0.133333	20	NA	NA	NA	NA	NA	NA	NA	NA	NA	NA	NO	NA	NA	NA	WHITE	NA	NA	NA	NA	NA	NA	NA	NA
prad_pik3r1_msk_2021	P-0002901	P-0002901-T01-IM3	prad_pik3r1_msk_2021:P-0002901-T01-IM3	prad_pik3r1_msk_2021:P-0002901	0	NA	Prostate Cancer	Prostate Adenocarcinoma	0.4539	IMPACT341	MSKCC	Lymph Node	MICROSATELLITE STABLE (MSS). See MSI note below.	0.56	Stable	2	PRAD	Prostate	Tumor	1	364	Metastasis	Male	Matched	0.0666667	60	NA	NA	NA	NA	NA	NA	NA	NA	NA	NA	YES	NA	NA	NA	WHITE	NA	NA	NA	NA	NA	NA	NA	NA
prad_pik3r1_msk_2021	P-0002990	P-0002990-T01-IM3	prad_pik3r1_msk_2021:P-0002990-T01-IM3	prad_pik3r1_msk_2021:P-0002990	0	NA	Prostate Cancer	Prostate Adenocarcinoma	0.2166	IMPACT341	MSKCC	Lymph Node	NA	0	Stable	2	PRAD	Prostate	Tumor	1	702	Metastasis	Male	Matched	0.0666667	70	NA	NA	NA	NA	NA	NA	NA	NA	NA	NA	YES	NA	NA	NA	WHITE	NA	NA	NA	NA	NA	NA	NA	NA
prad_pik3r1_msk_2021	P-0003040	P-0003040-T01-IM5	prad_pik3r1_msk_2021:P-0003040-T01-IM5	prad_pik3r1_msk_2021:P-0003040	0	NA	Prostate Cancer	Prostate Adenocarcinoma	0.5161	IMPACT410	MSKCC	Liver	MICROSATELLITE STABLE (MSS). See MSI note below.	2.12	Stable	3	PRAD	Prostate	Tumor	1	791	Metastasis	Male	Matched	0.1	70	NA	NA	NA	NA	NA	NA	NA	NA	NA	NA	NO	NA	NA	NA	WHITE	NA	NA	NA	NA	NA	NA	NA	NA
prad_pik3r1_msk_2021	P-0003101	P-0003101-T01-IM5	prad_pik3r1_msk_2021:P-0003101-T01-IM5	prad_pik3r1_msk_2021:P-0003101	0	NA	Prostate Cancer	Prostate Adenocarcinoma	0.1516	IMPACT410	MSKCC	Lung	MICROSATELLITE STABLE (MSS). See MSI note below.	0.18	Stable	5	PRAD	Prostate	Tumor	1	461	Metastasis	Male	Matched	0.166667	NA	NA	NA	NA	NA	NA	NA	NA	NA	NA	NA	NO	NA	NA	NA	WHITE	NA	NA	NA	NA	NA	NA	NA	NA
prad_pik3r1_msk_2021	P-0003150	P-0003150-T01-IM5	prad_pik3r1_msk_2021:P-0003150-T01-IM5	prad_pik3r1_msk_2021:P-0003150	0	NA	Prostate Cancer	Prostate Adenocarcinoma	0.3933	IMPACT410	MSKCC	Lung	NA	0.41	Stable	2	PRAD	Prostate	Tumor	1	221	Metastasis	Male	Matched	0.0666667	60	NA	NA	NA	NA	NA	NA	NA	NA	NA	NA	YES	NA	NA	NA	WHITE	NA	NA	NA	NA	NA	NA	NA	NA
prad_pik3r1_msk_2021	P-0003226	P-0003226-T01-IM5	prad_pik3r1_msk_2021:P-0003226-T01-IM5	prad_pik3r1_msk_2021:P-0003226	0	NA	Prostate Cancer	Prostate Adenocarcinoma	0.2004	IMPACT410	MSKCC	Bone	NA	0.66	Stable	3	PRAD	Prostate	Tumor	1	459	Metastasis	Male	Matched	0.1	20	NA	NA	NA	NA	NA	NA	NA	NA	NA	NA	YES	NA	NA	NA	PT REFUSED TO ANSWER	NA	NA	NA	NA	NA	NA	NA	NA
prad_pik3r1_msk_2021	P-0003395	P-0003395-T01-IM5	prad_pik3r1_msk_2021:P-0003395-T01-IM5	prad_pik3r1_msk_2021:P-0003395	0	NA	Prostate Cancer	Prostate Adenocarcinoma	0.5793	IMPACT410	MSKCC	Bone	MICROSATELLITE STABLE (MSS). See MSI note below.	0.66	Stable	2	PRAD	Prostate	Tumor	1	441	Metastasis	Male	Matched	0.0666667	30	NA	NA	NA	NA	NA	NA	NA	NA	NA	NA	NO	NA	NA	NA	WHITE	NA	NA	NA	NA	NA	NA	NA	NA
prad_pik3r1_msk_2021	P-0003442	P-0003442-T02-IM5	prad_pik3r1_msk_2021:P-0003442-T02-IM5	prad_pik3r1_msk_2021:P-0003442	0	NA	Prostate Cancer	Prostate Adenocarcinoma	0.289	IMPACT410	MSKCC	Bladder	NA	2.15	Stable	4	PRAD	Prostate	Tumor	1	578	Metastasis	Male	Matched	0.133333	80	NA	NA	NA	NA	NA	NA	NA	NA	NA	NA	YES	NA	NA	NA	WHITE	NA	NA	NA	NA	NA	NA	NA	NA
prad_pik3r1_msk_2021	P-0003468	P-0003468-T01-IM5	prad_pik3r1_msk_2021:P-0003468-T01-IM5	prad_pik3r1_msk_2021:P-0003468	0	NA	Prostate Cancer	Prostate Adenocarcinoma	0.6412	IMPACT410	MSKCC	Lung	NA	0.97	Stable	5	PRAD	Prostate	Tumor	1	596	Metastasis	Male	Matched	0.166667	10	NA	NA	NA	NA	NA	NA	NA	NA	NA	NA	YES	NA	NA	NA	BLACK OR AFRICAN AMERICAN	NA	NA	NA	NA	NA	NA	NA	NA
prad_pik3r1_msk_2021	P-0003619	P-0003619-T01-IM5	prad_pik3r1_msk_2021:P-0003619-T01-IM5	prad_pik3r1_msk_2021:P-0003619	0	NA	Prostate Cancer	Prostate Adenocarcinoma	0.5331	IMPACT410	MSKCC	Retroperitoneum	NA	1.21	Stable	2	PRAD	Prostate	Tumor	1	472	Metastasis	Male	Matched	0.0666667	80	NA	NA	NA	NA	NA	NA	NA	NA	NA	NA	NO	NA	NA	NA	WHITE	NA	NA	NA	NA	NA	NA	NA	NA
prad_pik3r1_msk_2021	P-0003856	P-0003856-T01-IM5	prad_pik3r1_msk_2021:P-0003856-T01-IM5	prad_pik3r1_msk_2021:P-0003856	0	NA	Prostate Cancer	Prostate Adenocarcinoma	0.1647	IMPACT410	MSKCC	Liver	NA	0	Stable	1	PRAD	Prostate	Tumor	1	329	Metastasis	Male	Matched	0.0333333	70	NA	NA	NA	NA	NA	NA	NA	NA	NA	NA	NO	NA	NA	NA	WHITE	NA	NA	NA	NA	NA	NA	NA	NA
prad_pik3r1_msk_2021	P-0003925	P-0003925-T01-IM3	prad_pik3r1_msk_2021:P-0003925-T01-IM3	prad_pik3r1_msk_2021:P-0003925	0	NA	Prostate Cancer	Prostate Adenocarcinoma	0.1975	IMPACT341	MSKCC	Lymph Node	NA	0	Stable	4	PRAD	Prostate	Tumor	1	670	Metastasis	Male	Matched	0.133333	60	NA	NA	NA	NA	NA	NA	NA	NA	NA	NA	NO	NA	NA	NA	WHITE	NA	NA	NA	NA	NA	NA	NA	NA
prad_pik3r1_msk_2021	P-0004061	P-0004061-T02-IM5	prad_pik3r1_msk_2021:P-0004061-T02-IM5	prad_pik3r1_msk_2021:P-0004061	0	NA	Prostate Cancer	Prostate Adenocarcinoma	0.1671	IMPACT410	MSKCC	Bladder	NA	0.9	Stable	2	PRAD	Prostate	Tumor	1	716	Metastasis	Male	Matched	0.0666667	50	NA	NA	NA	NA	NA	NA	NA	NA	NA	NA	NO	NA	NA	NA	PT REFUSED TO ANSWER	NA	NA	NA	NA	NA	NA	NA	NA
prad_pik3r1_msk_2021	P-0004243	P-0004243-T01-IM5	prad_pik3r1_msk_2021:P-0004243-T01-IM5	prad_pik3r1_msk_2021:P-0004243	0	NA	Prostate Cancer	Prostate Adenocarcinoma	0.3587	IMPACT410	MSKCC	Bone	NA	0.34	Stable	5	PRAD	Prostate	Tumor	1	358	Metastasis	Male	Matched	0.166667	70	NA	NA	NA	NA	NA	NA	NA	NA	NA	NA	NO	NA	NA	NA	BLACK OR AFRICAN AMERICAN	NA	NA	NA	NA	NA	NA	NA	NA
prad_pik3r1_msk_2021	P-0004285	P-0004285-T01-IM5	prad_pik3r1_msk_2021:P-0004285-T01-IM5	prad_pik3r1_msk_2021:P-0004285	0	NA	Prostate Cancer	Prostate Adenocarcinoma	0	IMPACT410	MSKCC	Lymph Node	MICROSATELLITE STABLE (MSS). See MSI note below.	0	Stable	5	PRAD	Prostate	Tumor	1	471	Metastasis	Male	Matched	0.166667	60	NA	NA	NA	NA	NA	NA	NA	NA	NA	NA	YES	NA	NA	NA	PT REFUSED TO ANSWER	NA	NA	NA	NA	NA	NA	NA	NA
prad_pik3r1_msk_2021	P-0004312	P-0004312-T01-IM5	prad_pik3r1_msk_2021:P-0004312-T01-IM5	prad_pik3r1_msk_2021:P-0004312	0	NA	Prostate Cancer	Prostate Adenocarcinoma	0.6094	IMPACT410	MSKCC	Bladder	NA	1.44	Stable	6	PRAD	Prostate	Tumor	1	388	Metastasis	Male	Matched	0.2	40	NA	NA	NA	NA	NA	NA	NA	NA	NA	NA	NO	NA	NA	NA	WHITE	NA	NA	NA	NA	NA	NA	NA	NA
prad_pik3r1_msk_2021	P-0004355	P-0004355-T01-IM5	prad_pik3r1_msk_2021:P-0004355-T01-IM5	prad_pik3r1_msk_2021:P-0004355	0	NA	Prostate Cancer	Prostate Adenocarcinoma	0.1681	IMPACT410	MSKCC	Pelvis	NA	0.17	Stable	3	PRAD	Prostate	Tumor	1	277	Metastasis	Male	Matched	0.1	40	NA	NA	NA	NA	NA	NA	NA	NA	NA	NA	NO	NA	NA	NA	PT REFUSED TO ANSWER	NA	NA	NA	NA	NA	NA	NA	NA
prad_pik3r1_msk_2021	P-0004482	P-0004482-T01-IM5	prad_pik3r1_msk_2021:P-0004482-T01-IM5	prad_pik3r1_msk_2021:P-0004482	0	NA	Prostate Cancer	Prostate Adenocarcinoma	0.0941	IMPACT410	MSKCC	Liver	NA	0.42	Stable	1	PRAD	Prostate	Tumor	1	696	Metastasis	Male	Matched	0.0333333	60	NA	NA	NA	NA	NA	NA	NA	NA	NA	NA	NO	NA	NA	NA	WHITE	NA	NA	NA	NA	NA	NA	NA	NA
prad_pik3r1_msk_2021	P-0004489	P-0004489-T01-IM5	prad_pik3r1_msk_2021:P-0004489-T01-IM5	prad_pik3r1_msk_2021:P-0004489	0	NA	Prostate Cancer	Prostate Adenocarcinoma	0.3805	IMPACT410	MSKCC	Retroperitoneum	NA	0.06	Stable	5	PRAD	Prostate	Tumor	1	484	Metastasis	Male	Matched	0.166667	40	NA	NA	NA	NA	NA	NA	NA	NA	NA	NA	YES	NA	NA	NA	WHITE	NA	NA	NA	NA	NA	NA	NA	NA
prad_pik3r1_msk_2021	P-0004600	P-0004600-T01-IM5	prad_pik3r1_msk_2021:P-0004600-T01-IM5	prad_pik3r1_msk_2021:P-0004600	0	NA	Prostate Cancer	Prostate Adenocarcinoma	0.6486	IMPACT410	MSKCC	Bone	NA	2.84	Stable	5	PRAD	Prostate	Tumor	1	1047	Metastasis	Male	Matched	0.166667	40	NA	NA	NA	NA	NA	NA	NA	NA	NA	NA	NO	NA	NA	NA	WHITE	NA	NA	NA	NA	NA	NA	NA	NA
prad_pik3r1_msk_2021	P-0004704	P-0004704-T01-IM5	prad_pik3r1_msk_2021:P-0004704-T01-IM5	prad_pik3r1_msk_2021:P-0004704	0	NA	Prostate Cancer	Prostate Adenocarcinoma	0.1668	IMPACT410	MSKCC	Bone	NA	0.81	Stable	4	PRAD	Prostate	Tumor	1	433	Metastasis	Male	Matched	0.133333	40	NA	NA	NA	NA	NA	NA	NA	NA	NA	NA	YES	NA	NA	NA	WHITE	NA	NA	NA	NA	NA	NA	NA	NA
prad_pik3r1_msk_2021	P-0004830	P-0004830-T01-IM5	prad_pik3r1_msk_2021:P-0004830-T01-IM5	prad_pik3r1_msk_2021:P-0004830	0	NA	Prostate Cancer	Prostate Adenocarcinoma	0.3858	IMPACT410	MSKCC	Lymph Node	MICROSATELLITE STABLE (MSS). See MSI note below.	1.33	Stable	3	PRAD	Prostate	Tumor	1	412	Metastasis	Male	Matched	0.1	50	NA	NA	NA	NA	NA	NA	NA	NA	NA	NA	NO	NA	NA	NA	WHITE	NA	NA	NA	NA	NA	NA	NA	NA
prad_pik3r1_msk_2021	P-0004892	P-0004892-T01-IM5	prad_pik3r1_msk_2021:P-0004892-T01-IM5	prad_pik3r1_msk_2021:P-0004892	0	NA	Prostate Cancer	Prostate Adenocarcinoma	0.1608	IMPACT410	MSKCC	Lung	NA	0.07	Stable	12	PRAD	Prostate	Tumor	1	904	Metastasis	Male	Matched	0.4	40	NA	NA	NA	NA	NA	NA	NA	NA	NA	NA	YES	NA	NA	NA	WHITE	NA	NA	NA	NA	NA	NA	NA	NA
prad_pik3r1_msk_2021	P-0005014	P-0005014-T01-IM5	prad_pik3r1_msk_2021:P-0005014-T01-IM5	prad_pik3r1_msk_2021:P-0005014	0	NA	Prostate Cancer	Prostate Adenocarcinoma	0.2337	IMPACT410	MSKCC	Lymph Node	NA	1.45	Stable	3	PRAD	Prostate	Tumor	1	759	Metastasis	Male	Matched	0.1	60	NA	NA	NA	NA	NA	NA	NA	NA	NA	NA	NO	NA	NA	NA	WHITE	NA	NA	NA	NA	NA	NA	NA	NA
prad_pik3r1_msk_2021	P-0005047	P-0005047-T01-IM5	prad_pik3r1_msk_2021:P-0005047-T01-IM5	prad_pik3r1_msk_2021:P-0005047	0	NA	Prostate Cancer	Prostate Adenocarcinoma	0.3048	IMPACT410	MSKCC	Lymph Node	NA	0.56	Stable	4	PRAD	Prostate	Tumor	1	856	Metastasis	Male	Matched	0.133333	30	NA	NA	NA	NA	NA	NA	NA	NA	NA	NA	NO	NA	NA	NA	WHITE	NA	NA	NA	NA	NA	NA	NA	NA
prad_pik3r1_msk_2021	P-0005050	P-0005050-T01-IM5	prad_pik3r1_msk_2021:P-0005050-T01-IM5	prad_pik3r1_msk_2021:P-0005050	0	NA	Prostate Cancer	Prostate Adenocarcinoma	0.1777	IMPACT410	MSKCC	Lymph Node	NA	1.06	Stable	3	PRAD	Prostate	Tumor	1	802	Metastasis	Male	Matched	0.1	80	NA	NA	NA	NA	NA	NA	NA	NA	NA	NA	NO	NA	NA	NA	WHITE	NA	NA	NA	NA	NA	NA	NA	NA
prad_pik3r1_msk_2021	P-0005111	P-0005111-T01-IM5	prad_pik3r1_msk_2021:P-0005111-T01-IM5	prad_pik3r1_msk_2021:P-0005111	0	NA	Prostate Cancer	Prostate Adenocarcinoma	0.0038	IMPACT410	MSKCC	Lymph Node	NA	2.15	Stable	5	PRAD	Prostate	Tumor	1	566	Metastasis	Male	Matched	0.166667	30	NA	NA	NA	NA	NA	NA	NA	NA	NA	NA	NO	NA	NA	NA	PT REFUSED TO ANSWER	NA	NA	NA	NA	NA	NA	NA	NA
prad_pik3r1_msk_2021	P-0005344	P-0005344-T01-IM5	prad_pik3r1_msk_2021:P-0005344-T01-IM5	prad_pik3r1_msk_2021:P-0005344	0	NA	Prostate Cancer	Prostate Adenocarcinoma	0.2371	IMPACT410	MSKCC	Lymph Node	MICROSATELLITE STABLE (MSS). See MSI note below.	0.75	Stable	3	PRAD	Prostate	Tumor	1	607	Metastasis	Male	Matched	0.1	60	NA	NA	NA	NA	NA	NA	NA	NA	NA	NA	NO	NA	NA	NA	BLACK OR AFRICAN AMERICAN	NA	NA	NA	NA	NA	NA	NA	NA
prad_pik3r1_msk_2021	P-0005428	P-0005428-T01-IM5	prad_pik3r1_msk_2021:P-0005428-T01-IM5	prad_pik3r1_msk_2021:P-0005428	0	NA	Prostate Cancer	Prostate Adenocarcinoma	0.2938	IMPACT410	MSKCC	Lymph Node	NA	0.59	Stable	5	PRAD	Prostate	Tumor	1	542	Metastasis	Male	Matched	0.166667	40	NA	NA	NA	NA	NA	NA	NA	NA	NA	NA	YES	NA	NA	NA	WHITE	NA	NA	NA	NA	NA	NA	NA	NA
prad_pik3r1_msk_2021	P-0005454	P-0005454-T01-IM5	prad_pik3r1_msk_2021:P-0005454-T01-IM5	prad_pik3r1_msk_2021:P-0005454	0	NA	Prostate Cancer	Prostate Adenocarcinoma	0.2443	IMPACT410	MSKCC	Lymph Node	NA	0.7	Stable	2	PRAD	Prostate	Tumor	1	967	Metastasis	Male	Matched	0.0666667	60	NA	NA	NA	NA	NA	NA	NA	NA	NA	NA	YES	NA	NA	NA	WHITE	NA	NA	NA	NA	NA	NA	NA	NA
prad_pik3r1_msk_2021	P-0005555	P-0005555-T01-IM5	prad_pik3r1_msk_2021:P-0005555-T01-IM5	prad_pik3r1_msk_2021:P-0005555	0	NA	Prostate Cancer	Prostate Adenocarcinoma	0.6223	IMPACT410	MSKCC	Liver	MICROSATELLITE STABLE (MSS). See MSI note below.	1.1	Stable	4	PRAD	Prostate	Tumor	1	1119	Metastasis	Male	Matched	0.133333	60	NA	NA	NA	NA	NA	NA	NA	NA	NA	NA	NO	NA	NA	NA	BLACK OR AFRICAN AMERICAN	NA	NA	NA	NA	NA	NA	NA	NA
prad_pik3r1_msk_2021	P-0005570	P-0005570-T01-IM5	prad_pik3r1_msk_2021:P-0005570-T01-IM5	prad_pik3r1_msk_2021:P-0005570	0	NA	Prostate Cancer	Prostate Adenocarcinoma	0.1246	IMPACT410	MSKCC	Lymph Node	NA	0.09	Stable	3	PRAD	Prostate	Tumor	1	529	Metastasis	Male	Matched	0.1	40	NA	NA	NA	NA	NA	NA	NA	NA	NA	NA	NO	NA	NA	NA	WHITE	NA	NA	NA	NA	NA	NA	NA	NA
prad_pik3r1_msk_2021	P-0005596	P-0005596-T01-IM5	prad_pik3r1_msk_2021:P-0005596-T01-IM5	prad_pik3r1_msk_2021:P-0005596	0	NA	Prostate Cancer	Prostate Adenocarcinoma	0.4289	IMPACT410	MSKCC	Lymph Node	MICROSATELLITE STABLE (MSS). See note.	0.95	Stable	NA	PRAD	Prostate	Tumor	1	937	Metastasis	Male	Matched	0	50	NA	NA	NA	NA	NA	NA	NA	NA	NA	NA	YES	NA	NA	NA	WHITE	NA	NA	NA	NA	NA	NA	NA	NA
prad_pik3r1_msk_2021	P-0005636	P-0005636-T01-IM5	prad_pik3r1_msk_2021:P-0005636-T01-IM5	prad_pik3r1_msk_2021:P-0005636	0	NA	Prostate Cancer	Prostate Adenocarcinoma	0.0815	IMPACT410	MSKCC	Lymph Node	NA	0.61	Stable	4	PRAD	Prostate	Tumor	1	1073	Metastasis	Male	Matched	0.133333	40	NA	NA	NA	NA	NA	NA	NA	NA	NA	NA	YES	NA	NA	NA	WHITE	NA	NA	NA	NA	NA	NA	NA	NA
prad_pik3r1_msk_2021	P-0005713	P-0005713-T01-IM5	prad_pik3r1_msk_2021:P-0005713-T01-IM5	prad_pik3r1_msk_2021:P-0005713	0	NA	Prostate Cancer	Prostate Adenocarcinoma	0.1993	IMPACT410	MSKCC	Lung	NA	0.24	Stable	4	PRAD	Prostate	Tumor	1	324	Metastasis	Male	Matched	0.133333	80	NA	NA	NA	NA	NA	NA	NA	NA	NA	NA	YES	NA	NA	NA	WHITE	NA	NA	NA	NA	NA	NA	NA	NA
prad_pik3r1_msk_2021	P-0005756	P-0005756-T01-IM5	prad_pik3r1_msk_2021:P-0005756-T01-IM5	prad_pik3r1_msk_2021:P-0005756	0	NA	Prostate Cancer	Prostate Adenocarcinoma	0.4267	IMPACT410	MSKCC	Lymph Node	NA	2.62	Stable	3	PRAD	Prostate	Tumor	1	1188	Metastasis	Male	Matched	0.1	NA	NA	NA	NA	NA	NA	NA	NA	NA	NA	NA	NO	NA	NA	NA	WHITE	NA	NA	NA	NA	NA	NA	NA	NA
prad_pik3r1_msk_2021	P-0005761	P-0005761-T01-IM5	prad_pik3r1_msk_2021:P-0005761-T01-IM5	prad_pik3r1_msk_2021:P-0005761	0	NA	Prostate Cancer	Prostate Adenocarcinoma	0.0104	IMPACT410	MSKCC	Liver	NA	0	Stable	5	PRAD	Prostate	Tumor	1	936	Metastasis	Male	Matched	0.166667	20	NA	NA	NA	NA	NA	NA	NA	NA	NA	NA	NO	NA	NA	NA	WHITE	NA	NA	NA	NA	NA	NA	NA	NA
prad_pik3r1_msk_2021	P-0005768	P-0005768-T02-IM5	prad_pik3r1_msk_2021:P-0005768-T02-IM5	prad_pik3r1_msk_2021:P-0005768	0	NA	Prostate Cancer	Prostate Adenocarcinoma	0.1909	IMPACT410	MSKCC	Lymph Node	MICROSATELLITE STABLE (MSS). See MSI note below.	1	Stable	3	PRAD	Prostate	Tumor	1	527	Metastasis	Male	Matched	0.1	70	NA	NA	NA	NA	NA	NA	NA	NA	NA	NA	NO	NA	NA	NA	WHITE	NA	NA	NA	NA	NA	NA	NA	NA
prad_pik3r1_msk_2021	P-0005787	P-0005787-T04-IM6	prad_pik3r1_msk_2021:P-0005787-T04-IM6	prad_pik3r1_msk_2021:P-0005787	0	NA	Prostate Cancer	Prostate Adenocarcinoma	0.5452	IMPACT468	MSKCC	Liver	MICROSATELLITE STABLE (MSS). See MSI note below.	2.12	Stable	1	PRAD	Prostate	Tumor	1	837	Metastasis	Male	Matched	0.0333333	60	NA	NA	NA	NA	NA	NA	NA	NA	NA	NA	YES	NA	NA	NA	WHITE	NA	NA	NA	NA	NA	NA	NA	NA
prad_pik3r1_msk_2021	P-0005806	P-0005806-T01-IM5	prad_pik3r1_msk_2021:P-0005806-T01-IM5	prad_pik3r1_msk_2021:P-0005806	0	NA	Prostate Cancer	Prostate Adenocarcinoma	0.4069	IMPACT410	MSKCC	Bone	NA	0.88	Stable	2	PRAD	Prostate	Tumor	1	484	Metastasis	Male	Matched	0.0666667	50	NA	NA	NA	NA	NA	NA	NA	NA	NA	NA	YES	NA	NA	NA	WHITE	NA	NA	NA	NA	NA	NA	NA	NA
prad_pik3r1_msk_2021	P-0005810	P-0005810-T01-IM5	prad_pik3r1_msk_2021:P-0005810-T01-IM5	prad_pik3r1_msk_2021:P-0005810	0	NA	Prostate Cancer	Prostate Adenocarcinoma	0.0978	IMPACT410	MSKCC	Lymph Node	NA	0.14	Stable	2	PRAD	Prostate	Tumor	1	974	Metastasis	Male	Matched	0.0666667	30	NA	NA	NA	NA	NA	NA	NA	NA	NA	NA	YES	NA	NA	NA	WHITE	NA	NA	NA	NA	NA	NA	NA	NA
prad_pik3r1_msk_2021	P-0005811	P-0005811-T01-IM5	prad_pik3r1_msk_2021:P-0005811-T01-IM5	prad_pik3r1_msk_2021:P-0005811	0	NA	Prostate Cancer	Prostate Adenocarcinoma	0.2094	IMPACT410	MSKCC	Lymph Node	NA	0.27	Stable	2	PRAD	Prostate	Tumor	1	1069	Metastasis	Male	Matched	0.0666667	80	NA	NA	NA	NA	NA	NA	NA	NA	NA	NA	NO	NA	NA	NA	WHITE	NA	NA	NA	NA	NA	NA	NA	NA
prad_pik3r1_msk_2021	P-0005867	P-0005867-T01-IM5	prad_pik3r1_msk_2021:P-0005867-T01-IM5	prad_pik3r1_msk_2021:P-0005867	0	NA	Prostate Cancer	Prostate Adenocarcinoma	0.1026	IMPACT410	MSKCC	Lymph Node	NA	0.26	Stable	7	PRAD	Prostate	Tumor	1	843	Metastasis	Male	Matched	0.233333	20	NA	NA	NA	NA	NA	NA	NA	NA	NA	NA	NO	NA	NA	NA	WHITE	NA	NA	NA	NA	NA	NA	NA	NA
prad_pik3r1_msk_2021	P-0005890	P-0005890-T01-IM5	prad_pik3r1_msk_2021:P-0005890-T01-IM5	prad_pik3r1_msk_2021:P-0005890	0	NA	Prostate Cancer	Prostate Adenocarcinoma	0.0171	IMPACT410	MSKCC	Bone	NA	0	Stable	1	PRAD	Prostate	Tumor	1	723	Metastasis	Male	Matched	0.0333333	20	NA	NA	NA	NA	NA	NA	NA	NA	NA	NA	YES	NA	NA	NA	WHITE	NA	NA	NA	NA	NA	NA	NA	NA
prad_pik3r1_msk_2021	P-0005933	P-0005933-T01-IM5	prad_pik3r1_msk_2021:P-0005933-T01-IM5	prad_pik3r1_msk_2021:P-0005933	0	NA	Prostate Cancer	Prostate Adenocarcinoma	0.3343	IMPACT410	MSKCC	Lymph Node	NA	0.43	Stable	1	PRAD	Prostate	Tumor	1	836	Metastasis	Male	Matched	0.0333333	70	NA	NA	NA	NA	NA	NA	NA	NA	NA	NA	YES	NA	NA	NA	WHITE	NA	NA	NA	NA	NA	NA	NA	NA
prad_pik3r1_msk_2021	P-0005953	P-0005953-T01-IM5	prad_pik3r1_msk_2021:P-0005953-T01-IM5	prad_pik3r1_msk_2021:P-0005953	0	NA	Prostate Cancer	Prostate Adenocarcinoma	0.2378	IMPACT410	MSKCC	Lymph Node	NA	1.63	Stable	2	PRAD	Prostate	Tumor	1	982	Metastasis	Male	Matched	0.0666667	70	NA	NA	NA	NA	NA	NA	NA	NA	NA	NA	YES	NA	NA	NA	WHITE	NA	NA	NA	NA	NA	NA	NA	NA
prad_pik3r1_msk_2021	P-0005970	P-0005970-T01-IM5	prad_pik3r1_msk_2021:P-0005970-T01-IM5	prad_pik3r1_msk_2021:P-0005970	0	NA	Prostate Cancer	Prostate Adenocarcinoma	0.4495	IMPACT410	MSKCC	Liver	NA	0.8	Stable	3	PRAD	Prostate	Tumor	1	925	Metastasis	Male	Matched	0.1	50	NA	NA	NA	NA	NA	NA	NA	NA	NA	NA	YES	NA	NA	NA	WHITE	NA	NA	NA	NA	NA	NA	NA	NA
prad_pik3r1_msk_2021	P-0005976	P-0005976-T01-IM5	prad_pik3r1_msk_2021:P-0005976-T01-IM5	prad_pik3r1_msk_2021:P-0005976	0	NA	Prostate Cancer	Prostate Adenocarcinoma	0.6983	IMPACT410	MSKCC	Liver	NA	3.53	Indeterminate	4	PRAD	Prostate	Tumor	1	1409	Metastasis	Male	Matched	0.133333	80	NA	NA	NA	NA	NA	NA	NA	NA	NA	NA	NO	NA	NA	NA	WHITE	NA	NA	NA	NA	NA	NA	NA	NA
prad_pik3r1_msk_2021	P-0006108	P-0006108-T01-IM5	prad_pik3r1_msk_2021:P-0006108-T01-IM5	prad_pik3r1_msk_2021:P-0006108	0	NA	Prostate Cancer	Prostate Adenocarcinoma	0.1474	IMPACT410	MSKCC	Lymph Node	NA	0.15	Stable	3	PRAD	Prostate	Tumor	1	954	Metastasis	Male	Matched	0.1	30	NA	NA	NA	NA	NA	NA	NA	NA	NA	NA	YES	NA	NA	NA	WHITE	NA	NA	NA	NA	NA	NA	NA	NA
prad_pik3r1_msk_2021	P-0006231	P-0006231-T01-IM5	prad_pik3r1_msk_2021:P-0006231-T01-IM5	prad_pik3r1_msk_2021:P-0006231	0	NA	Prostate Cancer	Prostate Adenocarcinoma	0.0907	IMPACT410	MSKCC	Soft Tissue	MICROSATELLITE STABLE (MSS). See MSI note below.	0.4	Stable	5	PRAD	Prostate	Tumor	1	1089	Metastasis	Male	Matched	0.166667	20	NA	NA	NA	NA	NA	NA	NA	NA	NA	NA	NO	NA	NA	NA	WHITE	NA	NA	NA	NA	NA	NA	NA	NA
prad_pik3r1_msk_2021	P-0006461	P-0006461-T01-IM5	prad_pik3r1_msk_2021:P-0006461-T01-IM5	prad_pik3r1_msk_2021:P-0006461	0	NA	Prostate Cancer	Prostate Adenocarcinoma	0.2022	IMPACT410	MSKCC	Bone	NA	0.08	Stable	9	PRAD	Prostate	Tumor	1	799	Metastasis	Male	Matched	0.3	30	NA	NA	NA	NA	NA	NA	NA	NA	NA	NA	YES	NA	NA	NA	WHITE	NA	NA	NA	NA	NA	NA	NA	NA
prad_pik3r1_msk_2021	P-0006584	P-0006584-T01-IM5	prad_pik3r1_msk_2021:P-0006584-T01-IM5	prad_pik3r1_msk_2021:P-0006584	0	NA	Prostate Cancer	Prostate Adenocarcinoma	0.1682	IMPACT410	MSKCC	Bone	MICROSATELLITE STABLE (MSS). See MSI note below.	0.53	Stable	3	PRAD	Prostate	Tumor	1	618	Metastasis	Male	Matched	0.1	10	NA	NA	NA	NA	NA	NA	NA	NA	NA	NA	NO	NA	NA	NA	WHITE	NA	NA	NA	NA	NA	NA	NA	NA
prad_pik3r1_msk_2021	P-0006602	P-0006602-T02-IM5	prad_pik3r1_msk_2021:P-0006602-T02-IM5	prad_pik3r1_msk_2021:P-0006602	0	NA	Prostate Cancer	Prostate Adenocarcinoma	0.1115	IMPACT410	MSKCC	Pelvis	NA	0.24	Stable	4	PRAD	Prostate	Tumor	1	199	Metastasis	Male	Matched	0.133333	30	NA	NA	NA	NA	NA	NA	NA	NA	NA	NA	YES	NA	NA	NA	WHITE	NA	NA	NA	NA	NA	NA	NA	NA
prad_pik3r1_msk_2021	P-0006670	P-0006670-T01-IM5	prad_pik3r1_msk_2021:P-0006670-T01-IM5	prad_pik3r1_msk_2021:P-0006670	0	NA	Prostate Cancer	Prostate Adenocarcinoma	0.3981	IMPACT410	MSKCC	Bone	MICROSATELLITE STABLE (MSS). See MSI note below.	1.5	Stable	1	PRAD	Prostate	Tumor	1	395	Metastasis	Male	Matched	0.0333333	60	NA	NA	NA	NA	NA	NA	NA	NA	NA	NA	YES	NA	NA	NA	WHITE	NA	NA	NA	NA	NA	NA	NA	NA
prad_pik3r1_msk_2021	P-0006684	P-0006684-T01-IM5	prad_pik3r1_msk_2021:P-0006684-T01-IM5	prad_pik3r1_msk_2021:P-0006684	0	NA	Prostate Cancer	Prostate Adenocarcinoma	0.0739	IMPACT410	MSKCC	Pancreas	NA	0.08	Stable	1	PRAD	Prostate	Tumor	1	832	Metastasis	Male	Matched	0.0333333	60	NA	NA	NA	NA	NA	NA	NA	NA	NA	NA	NO	NA	NA	NA	WHITE	NA	NA	NA	NA	NA	NA	NA	NA
prad_pik3r1_msk_2021	P-0006692	P-0006692-T01-IM5	prad_pik3r1_msk_2021:P-0006692-T01-IM5	prad_pik3r1_msk_2021:P-0006692	0	NA	Prostate Cancer	Prostate Adenocarcinoma	0.6225	IMPACT410	MSKCC	Mediastinum	NA	0.88	Stable	6	PRAD	Prostate	Tumor	1	831	Metastasis	Male	Matched	0.2	70	NA	NA	NA	NA	NA	NA	NA	NA	NA	NA	NO	NA	NA	NA	WHITE	NA	NA	NA	NA	NA	NA	NA	NA
prad_pik3r1_msk_2021	P-0006749	P-0006749-T01-IM5	prad_pik3r1_msk_2021:P-0006749-T01-IM5	prad_pik3r1_msk_2021:P-0006749	0	NA	Prostate Cancer	Prostate Adenocarcinoma	0.2604	IMPACT410	MSKCC	Lung	NA	1.21	Stable	5	PRAD	Prostate	Tumor	1	672	Metastasis	Male	Matched	0.166667	10	NA	NA	NA	NA	NA	NA	NA	NA	NA	NA	YES	NA	NA	NA	WHITE	NA	NA	NA	NA	NA	NA	NA	NA
prad_pik3r1_msk_2021	P-0006751	P-0006751-T01-IM5	prad_pik3r1_msk_2021:P-0006751-T01-IM5	prad_pik3r1_msk_2021:P-0006751	0	NA	Prostate Cancer	Prostate Adenocarcinoma	0.2454	IMPACT410	MSKCC	Epidural	MICROSATELLITE STABLE (MSS). See MSI note below.	0.28	Stable	1	PRAD	Prostate	Tumor	1	879	Metastasis	Male	Matched	0.0333333	70	NA	NA	NA	NA	NA	NA	NA	NA	NA	NA	YES	NA	NA	NA	WHITE	NA	NA	NA	NA	NA	NA	NA	NA
prad_pik3r1_msk_2021	P-0006840	P-0006840-T01-IM5	prad_pik3r1_msk_2021:P-0006840-T01-IM5	prad_pik3r1_msk_2021:P-0006840	0	NA	Prostate Cancer	Prostate Adenocarcinoma	0.3052	IMPACT410	MSKCC	Lymph Node	NA	0.85	Stable	9	PRAD	Prostate	Tumor	1	1001	Metastasis	Male	Matched	0.3	20	NA	NA	NA	NA	NA	NA	NA	NA	NA	NA	YES	NA	NA	NA	WHITE	NA	NA	NA	NA	NA	NA	NA	NA
prad_pik3r1_msk_2021	P-0006856	P-0006856-T01-IM5	prad_pik3r1_msk_2021:P-0006856-T01-IM5	prad_pik3r1_msk_2021:P-0006856	0	NA	Prostate Cancer	Prostate Adenocarcinoma	0.4961	IMPACT410	MSKCC	Liver	NA	1.51	Stable	4	PRAD	Prostate	Tumor	1	779	Metastasis	Male	Matched	0.133333	40	NA	NA	NA	NA	NA	NA	NA	NA	NA	NA	YES	NA	NA	NA	WHITE	NA	NA	NA	NA	NA	NA	NA	NA
prad_pik3r1_msk_2021	P-0006894	P-0006894-T01-IM5	prad_pik3r1_msk_2021:P-0006894-T01-IM5	prad_pik3r1_msk_2021:P-0006894	0	NA	Prostate Cancer	Prostate Adenocarcinoma	0.104	IMPACT410	MSKCC	Lymph Node	NA	0.16	Stable	2	PRAD	Prostate	Tumor	1	406	Metastasis	Male	Matched	0.0666667	10	NA	NA	NA	NA	NA	NA	NA	NA	NA	NA	YES	NA	NA	NA	WHITE	NA	NA	NA	NA	NA	NA	NA	NA
prad_pik3r1_msk_2021	P-0006905	P-0006905-T01-IM5	prad_pik3r1_msk_2021:P-0006905-T01-IM5	prad_pik3r1_msk_2021:P-0006905	0	NA	Prostate Cancer	Prostate Adenocarcinoma	0.5202	IMPACT410	MSKCC	Lymph Node	NA	2.89	Stable	6	PRAD	Prostate	Tumor	1	981	Metastasis	Male	Matched	0.2	10	NA	NA	NA	NA	NA	NA	NA	NA	NA	NA	NO	NA	NA	NA	PT REFUSED TO ANSWER	NA	NA	NA	NA	NA	NA	NA	NA
prad_pik3r1_msk_2021	P-0006931	P-0006931-T01-IM5	prad_pik3r1_msk_2021:P-0006931-T01-IM5	prad_pik3r1_msk_2021:P-0006931	0	NA	Prostate Cancer	Prostate Adenocarcinoma	0.0932	IMPACT410	MSKCC	Lymph Node	MICROSATELLITE STABLE (MSS). See MSI note below.	0.07	Stable	1	PRAD	Prostate	Tumor	1	650	Metastasis	Male	Matched	0.0333333	20	NA	NA	NA	NA	NA	NA	NA	NA	NA	NA	YES	NA	NA	NA	WHITE	NA	NA	NA	NA	NA	NA	NA	NA
prad_pik3r1_msk_2021	P-0006994	P-0006994-T01-IM5	prad_pik3r1_msk_2021:P-0006994-T01-IM5	prad_pik3r1_msk_2021:P-0006994	0	NA	Prostate Cancer	Prostate Adenocarcinoma	0.4148	IMPACT410	MSKCC	Lymph Node	NA	0.57	Stable	4	PRAD	Prostate	Tumor	1	852	Metastasis	Male	Matched	0.133333	40	NA	NA	NA	NA	NA	NA	NA	NA	NA	NA	YES	NA	NA	NA	WHITE	NA	NA	NA	NA	NA	NA	NA	NA
prad_pik3r1_msk_2021	P-0007006	P-0007006-T01-IM5	prad_pik3r1_msk_2021:P-0007006-T01-IM5	prad_pik3r1_msk_2021:P-0007006	0	NA	Prostate Cancer	Prostate Adenocarcinoma	0.1034	IMPACT410	MSKCC	Soft Tissue	NA	0.07	Stable	4	PRAD	Prostate	Tumor	1	578	Metastasis	Male	Matched	0.133333	20	NA	NA	NA	NA	NA	NA	NA	NA	NA	NA	NO	NA	NA	NA	WHITE	NA	NA	NA	NA	NA	NA	NA	NA
prad_pik3r1_msk_2021	P-0007025	P-0007025-T01-IM5	prad_pik3r1_msk_2021:P-0007025-T01-IM5	prad_pik3r1_msk_2021:P-0007025	0	NA	Prostate Cancer	Prostate Adenocarcinoma	0.249	IMPACT410	MSKCC	Lymph Node	NA	0.3	Stable	2	PRAD	Prostate	Tumor	1	981	Metastasis	Male	Matched	0.0666667	10	NA	NA	NA	NA	NA	NA	NA	NA	NA	NA	YES	NA	NA	NA	WHITE	NA	NA	NA	NA	NA	NA	NA	NA
prad_pik3r1_msk_2021	P-0007043	P-0007043-T01-IM5	prad_pik3r1_msk_2021:P-0007043-T01-IM5	prad_pik3r1_msk_2021:P-0007043	0	NA	Prostate Cancer	Prostate Adenocarcinoma	0.2194	IMPACT410	MSKCC	Soft Tissue	MICROSATELLITE STABLE (MSS). See MSI note below.	0.29	Stable	3	PRAD	Prostate	Tumor	1	470	Metastasis	Male	Matched	0.1	30	NA	NA	NA	NA	NA	NA	NA	NA	NA	NA	YES	NA	NA	NA	WHITE	NA	NA	NA	NA	NA	NA	NA	NA
prad_pik3r1_msk_2021	P-0007182	P-0007182-T01-IM5	prad_pik3r1_msk_2021:P-0007182-T01-IM5	prad_pik3r1_msk_2021:P-0007182	0	NA	Prostate Cancer	Prostate Adenocarcinoma	0.6109	IMPACT410	MSKCC	Spine	NA	0.97	Stable	3	PRAD	Prostate	Tumor	1	387	Metastasis	Male	Matched	0.1	70	NA	NA	NA	NA	NA	NA	NA	NA	NA	NA	YES	NA	NA	NA	WHITE	NA	NA	NA	NA	NA	NA	NA	NA
prad_pik3r1_msk_2021	P-0007289	P-0007289-T02-IM5	prad_pik3r1_msk_2021:P-0007289-T02-IM5	prad_pik3r1_msk_2021:P-0007289	0	NA	Prostate Cancer	Prostate Adenocarcinoma	0.5668	IMPACT410	MSKCC	Bladder	MICROSATELLITE STABLE (MSS). See MSI note below.	1.84	Stable	5	PRAD	Prostate	Tumor	1	657	Metastasis	Male	Matched	0.166667	80	NA	NA	NA	NA	NA	NA	NA	NA	NA	NA	NO	NA	NA	NA	WHITE	NA	NA	NA	NA	NA	NA	NA	NA
prad_pik3r1_msk_2021	P-0007402	P-0007402-T01-IM5	prad_pik3r1_msk_2021:P-0007402-T01-IM5	prad_pik3r1_msk_2021:P-0007402	0	NA	Prostate Cancer	Prostate Adenocarcinoma	0.192	IMPACT410	MSKCC	Lymph Node	NA	0.17	Stable	3	PRAD	Prostate	Tumor	1	763	Metastasis	Male	Matched	0.1	25	NA	NA	NA	NA	NA	NA	NA	NA	NA	NA	YES	NA	NA	NA	WHITE	NA	NA	NA	NA	NA	NA	NA	NA
prad_pik3r1_msk_2021	P-0007411	P-0007411-T02-IM5	prad_pik3r1_msk_2021:P-0007411-T02-IM5	prad_pik3r1_msk_2021:P-0007411	0	NA	Prostate Cancer	Prostate Adenocarcinoma	0.2297	IMPACT410	MSKCC	Lymph Node	NA	0.41	Stable	4	PRAD	Prostate	Tumor	1	854	Metastasis	Male	Matched	0.133333	40	NA	NA	NA	NA	NA	NA	NA	NA	NA	NA	YES	NA	NA	NA	WHITE	NA	NA	NA	NA	NA	NA	NA	NA
prad_pik3r1_msk_2021	P-0007416	P-0007416-T01-IM5	prad_pik3r1_msk_2021:P-0007416-T01-IM5	prad_pik3r1_msk_2021:P-0007416	0	NA	Prostate Cancer	Prostate Adenocarcinoma	0.6236	IMPACT410	MSKCC	Bone	NA	2.88	Stable	2	PRAD	Prostate	Tumor	1	361	Metastasis	Male	Matched	0.0666667	95	NA	NA	NA	NA	NA	NA	NA	NA	NA	NA	NO	NA	NA	NA	WHITE	NA	NA	NA	NA	NA	NA	NA	NA
prad_pik3r1_msk_2021	P-0007515	P-0007515-T01-IM5	prad_pik3r1_msk_2021:P-0007515-T01-IM5	prad_pik3r1_msk_2021:P-0007515	0	NA	Prostate Cancer	Prostate Adenocarcinoma	0.5095	IMPACT410	MSKCC	Bone	NA	1.43	Stable	3	PRAD	Prostate	Tumor	1	924	Metastasis	Male	Matched	0.1	95	NA	NA	NA	NA	NA	NA	NA	NA	NA	NA	YES	NA	NA	NA	WHITE	NA	NA	NA	NA	NA	NA	NA	NA
prad_pik3r1_msk_2021	P-0007529	P-0007529-T01-IM5	prad_pik3r1_msk_2021:P-0007529-T01-IM5	prad_pik3r1_msk_2021:P-0007529	0	NA	Prostate Cancer	Prostate Adenocarcinoma	0.0001	IMPACT410	MSKCC	Lymph Node	NA	0.09	Stable	4	PRAD	Prostate	Tumor	1	721	Metastasis	Male	Matched	0.133333	40	NA	NA	NA	NA	NA	NA	NA	NA	NA	NA	YES	NA	NA	NA	WHITE	NA	NA	NA	NA	NA	NA	NA	NA
prad_pik3r1_msk_2021	P-0007533	P-0007533-T01-IM5	prad_pik3r1_msk_2021:P-0007533-T01-IM5	prad_pik3r1_msk_2021:P-0007533	0	NA	Prostate Cancer	Prostate Adenocarcinoma	0.3178	IMPACT410	MSKCC	Liver	NA	1.22	Stable	3	PRAD	Prostate	Tumor	1	811	Metastasis	Male	Matched	0.1	80	NA	NA	NA	NA	NA	NA	NA	NA	NA	NA	YES	NA	NA	NA	WHITE	NA	NA	NA	NA	NA	NA	NA	NA
prad_pik3r1_msk_2021	P-0007629	P-0007629-T01-IM5	prad_pik3r1_msk_2021:P-0007629-T01-IM5	prad_pik3r1_msk_2021:P-0007629	0	NA	Prostate Cancer	Prostate Adenocarcinoma	0.2669	IMPACT410	MSKCC	Bone	NA	0.45	Stable	4	PRAD	Prostate	Tumor	1	455	Metastasis	Male	Matched	0.133333	20	NA	NA	NA	NA	NA	NA	NA	NA	NA	NA	YES	NA	NA	NA	WHITE	NA	NA	NA	NA	NA	NA	NA	NA
prad_pik3r1_msk_2021	P-0007749	P-0007749-T01-IM5	prad_pik3r1_msk_2021:P-0007749-T01-IM5	prad_pik3r1_msk_2021:P-0007749	0	NA	Prostate Cancer	Prostate Adenocarcinoma	0.2429	IMPACT410	MSKCC	Omentum	NA	0.38	Stable	2	PRAD	Prostate	Tumor	1	884	Metastasis	Male	Matched	0.0666667	40	NA	NA	NA	NA	NA	NA	NA	NA	NA	NA	NO	NA	NA	NA	WHITE	NA	NA	NA	NA	NA	NA	NA	NA
prad_pik3r1_msk_2021	P-0007856	P-0007856-T01-IM5	prad_pik3r1_msk_2021:P-0007856-T01-IM5	prad_pik3r1_msk_2021:P-0007856	0	NA	Prostate Cancer	Prostate Adenocarcinoma	0.228	IMPACT410	MSKCC	Pelvic Nodule	MICROSATELLITE STABLE (MSS). See MSI note below.	0.22	Stable	3	PRAD	Prostate	Tumor	1	724	Metastasis	Male	Matched	0.1	30	NA	NA	NA	NA	NA	NA	NA	NA	NA	NA	YES	NA	NA	NA	PT REFUSED TO ANSWER	NA	NA	NA	NA	NA	NA	NA	NA
prad_pik3r1_msk_2021	P-0008048	P-0008048-T01-IM5	prad_pik3r1_msk_2021:P-0008048-T01-IM5	prad_pik3r1_msk_2021:P-0008048	0	NA	Prostate Cancer	Prostate Adenocarcinoma	0.0188	IMPACT410	MSKCC	Bone	NA	0	Stable	5	PRAD	Prostate	Tumor	1	918	Metastasis	Male	Matched	0.166667	20	NA	NA	NA	NA	NA	NA	NA	NA	NA	NA	YES	NA	NA	NA	WHITE	NA	NA	NA	NA	NA	NA	NA	NA
prad_pik3r1_msk_2021	P-0008069	P-0008069-T01-IM5	prad_pik3r1_msk_2021:P-0008069-T01-IM5	prad_pik3r1_msk_2021:P-0008069	0	NA	Prostate Cancer	Prostate Adenocarcinoma	0.0028	IMPACT410	MSKCC	Liver	NA	0.08	Stable	1	PRAD	Prostate	Tumor	1	895	Metastasis	Male	Matched	0.0333333	15	NA	NA	NA	NA	NA	NA	NA	NA	NA	NA	NO	NA	NA	NA	WHITE	NA	NA	NA	NA	NA	NA	NA	NA
prad_pik3r1_msk_2021	P-0008074	P-0008074-T01-IM5	prad_pik3r1_msk_2021:P-0008074-T01-IM5	prad_pik3r1_msk_2021:P-0008074	0	NA	Prostate Cancer	Prostate Adenocarcinoma	0.1784	IMPACT410	MSKCC	Lymph Node	NA	0.33	Stable	2	PRAD	Prostate	Tumor	1	862	Metastasis	Male	Matched	0.0666667	70	NA	NA	NA	NA	NA	NA	NA	NA	NA	NA	YES	NA	NA	NA	WHITE	NA	NA	NA	NA	NA	NA	NA	NA
prad_pik3r1_msk_2021	P-0008098	P-0008098-T01-IM5	prad_pik3r1_msk_2021:P-0008098-T01-IM5	prad_pik3r1_msk_2021:P-0008098	0	NA	Prostate Cancer	Prostate Adenocarcinoma	0.2853	IMPACT410	MSKCC	Bone	NA	0.47	Stable	5	PRAD	Prostate	Tumor	1	882	Metastasis	Male	Matched	0.166667	20	NA	NA	NA	NA	NA	NA	NA	NA	NA	NA	YES	NA	NA	NA	WHITE	NA	NA	NA	NA	NA	NA	NA	NA
prad_pik3r1_msk_2021	P-0008139	P-0008139-T01-IM5	prad_pik3r1_msk_2021:P-0008139-T01-IM5	prad_pik3r1_msk_2021:P-0008139	0	NA	Prostate Cancer	Prostate Adenocarcinoma	0.1754	IMPACT410	MSKCC	Lymph Node	NA	1.61	Stable	1	PRAD	Prostate	Tumor	1	256	Metastasis	Male	Matched	0.0333333	10	NA	NA	NA	NA	NA	NA	NA	NA	NA	NA	YES	NA	NA	NA	WHITE	NA	NA	NA	NA	NA	NA	NA	NA
prad_pik3r1_msk_2021	P-0008206	P-0008206-T01-IM5	prad_pik3r1_msk_2021:P-0008206-T01-IM5	prad_pik3r1_msk_2021:P-0008206	0	NA	Prostate Cancer	Prostate Adenocarcinoma	0.6754	IMPACT410	MSKCC	Neck	NA	1.55	Stable	1	PRAD	Prostate	Tumor	1	1141	Metastasis	Male	Matched	0.0333333	70	NA	NA	NA	NA	NA	NA	NA	NA	NA	NA	NO	NA	NA	NA	WHITE	NA	NA	NA	NA	NA	NA	NA	NA
prad_pik3r1_msk_2021	P-0008315	P-0008315-T01-IM5	prad_pik3r1_msk_2021:P-0008315-T01-IM5	prad_pik3r1_msk_2021:P-0008315	0	NA	Prostate Cancer	Prostate Adenocarcinoma	0.2679	IMPACT410	MSKCC	Liver	NA	0.92	Stable	5	PRAD	Prostate	Tumor	1	987	Metastasis	Male	Matched	0.166667	60	NA	NA	NA	NA	NA	NA	NA	NA	NA	NA	YES	NA	NA	NA	WHITE	NA	NA	NA	NA	NA	NA	NA	NA
prad_pik3r1_msk_2021	P-0008390	P-0008390-T01-IM5	prad_pik3r1_msk_2021:P-0008390-T01-IM5	prad_pik3r1_msk_2021:P-0008390	0	NA	Prostate Cancer	Prostate Adenocarcinoma	0.5594	IMPACT410	MSKCC	Liver	NA	2.48	Stable	6	PRAD	Prostate	Tumor	1	1331	Metastasis	Male	Matched	0.2	70	NA	NA	NA	NA	NA	NA	NA	NA	NA	NA	NO	NA	NA	NA	WHITE	NA	NA	NA	NA	NA	NA	NA	NA
prad_pik3r1_msk_2021	P-0008441	P-0008441-T01-IM5	prad_pik3r1_msk_2021:P-0008441-T01-IM5	prad_pik3r1_msk_2021:P-0008441	0	NA	Prostate Cancer	Prostate Adenocarcinoma	0.5474	IMPACT410	MSKCC	Lymph Node	NA	2.07	Stable	1	PRAD	Prostate	Tumor	1	960	Metastasis	Male	Matched	0.0333333	70	NA	NA	NA	NA	NA	NA	NA	NA	NA	NA	NO	NA	NA	NA	WHITE	NA	NA	NA	NA	NA	NA	NA	NA
prad_pik3r1_msk_2021	P-0008461	P-0008461-T01-IM5	prad_pik3r1_msk_2021:P-0008461-T01-IM5	prad_pik3r1_msk_2021:P-0008461	0	NA	Prostate Cancer	Prostate Adenocarcinoma	0.118	IMPACT410	MSKCC	Retroperitoneum	NA	0.72	Stable	6	PRAD	Prostate	Tumor	1	716	Metastasis	Male	Matched	0.2	40	NA	NA	NA	NA	NA	NA	NA	NA	NA	NA	YES	NA	NA	NA	BLACK OR AFRICAN AMERICAN	NA	NA	NA	NA	NA	NA	NA	NA
prad_pik3r1_msk_2021	P-0008591	P-0008591-T01-IM5	prad_pik3r1_msk_2021:P-0008591-T01-IM5	prad_pik3r1_msk_2021:P-0008591	0	NA	Prostate Cancer	Prostate Adenocarcinoma	0.5429	IMPACT410	MSKCC	Brain	NA	2.23	Stable	2	PRAD	Prostate	Tumor	1	794	Metastasis	Male	Matched	0.0666667	70	NA	NA	NA	NA	NA	NA	NA	NA	NA	NA	NO	NA	NA	NA	WHITE	NA	NA	NA	NA	NA	NA	NA	NA
prad_pik3r1_msk_2021	P-0008769	P-0008769-T02-IM5	prad_pik3r1_msk_2021:P-0008769-T02-IM5	prad_pik3r1_msk_2021:P-0008769	0	NA	Prostate Cancer	Prostate Adenocarcinoma	0.1887	IMPACT410	MSKCC	Lung	MICROSATELLITE STABLE (MSS). See MSI note below.	0.25	Stable	4	PRAD	Prostate	Tumor	1	673	Metastasis	Male	Matched	0.133333	80	NA	NA	NA	NA	NA	NA	NA	NA	NA	NA	YES	NA	NA	NA	PT REFUSED TO ANSWER	NA	NA	NA	NA	NA	NA	NA	NA
prad_pik3r1_msk_2021	P-0008771	P-0008771-T01-IM5	prad_pik3r1_msk_2021:P-0008771-T01-IM5	prad_pik3r1_msk_2021:P-0008771	0	NA	Prostate Cancer	Prostate Adenocarcinoma	0.1756	IMPACT410	MSKCC	Lymph Node	NA	0.16	Stable	3	PRAD	Prostate	Tumor	1	826	Metastasis	Male	Matched	0.1	80	NA	NA	NA	NA	NA	NA	NA	NA	NA	NA	YES	NA	NA	NA	WHITE	NA	NA	NA	NA	NA	NA	NA	NA
prad_pik3r1_msk_2021	P-0008954	P-0008954-T01-IM5	prad_pik3r1_msk_2021:P-0008954-T01-IM5	prad_pik3r1_msk_2021:P-0008954	0	NA	Prostate Cancer	Prostate Adenocarcinoma	0.3322	IMPACT410	MSKCC	Lymph Node	MICROSATELLITE STABLE (MSS). See MSI note below.	1.26	Stable	1	PRAD	Prostate	Tumor	1	919	Metastasis	Male	Matched	0.0333333	95	NA	NA	NA	NA	NA	NA	NA	NA	NA	NA	YES	NA	NA	NA	WHITE	NA	NA	NA	NA	NA	NA	NA	NA
prad_pik3r1_msk_2021	P-0008966	P-0008966-T01-IM5	prad_pik3r1_msk_2021:P-0008966-T01-IM5	prad_pik3r1_msk_2021:P-0008966	0	NA	Prostate Cancer	Prostate Adenocarcinoma	0.2619	IMPACT410	MSKCC	Pelvis	NA	0.88	Stable	6	PRAD	Prostate	Tumor	1	876	Metastasis	Male	Matched	0.2	50	NA	NA	NA	NA	NA	NA	NA	NA	NA	NA	NO	NA	NA	NA	ASIAN-FAR EAST/INDIAN SUBCONT	NA	NA	NA	NA	NA	NA	NA	NA
prad_pik3r1_msk_2021	P-0009024	P-0009024-T01-IM5	prad_pik3r1_msk_2021:P-0009024-T01-IM5	prad_pik3r1_msk_2021:P-0009024	0	NA	Prostate Cancer	Prostate Adenocarcinoma	0.3222	IMPACT410	MSKCC	Bladder	NA	0.83	Stable	1	PRAD	Prostate	Tumor	1	938	Metastasis	Male	Matched	0.0333333	75	NA	NA	NA	NA	NA	NA	NA	NA	NA	NA	YES	NA	NA	NA	WHITE	NA	NA	NA	NA	NA	NA	NA	NA
prad_pik3r1_msk_2021	P-0009374	P-0009374-T02-IM5	prad_pik3r1_msk_2021:P-0009374-T02-IM5	prad_pik3r1_msk_2021:P-0009374	0	NA	Prostate Cancer	Prostate Adenocarcinoma	0.4093	IMPACT410	MSKCC	Liver	MICROSATELLITE STABLE (MSS). See MSI note below.	2.7	Stable	3	PRAD	Prostate	Tumor	1	943	Metastasis	Male	Matched	0.1	60	NA	NA	NA	NA	NA	NA	NA	NA	NA	NA	YES	NA	NA	NA	WHITE	NA	NA	NA	NA	NA	NA	NA	NA
prad_pik3r1_msk_2021	P-0009393	P-0009393-T01-IM5	prad_pik3r1_msk_2021:P-0009393-T01-IM5	prad_pik3r1_msk_2021:P-0009393	0	NA	Prostate Cancer	Prostate Adenocarcinoma	0.1164	IMPACT410	MSKCC	Lymph Node	NA	1.43	Stable	1	PRAD	Prostate	Tumor	1	201	Metastasis	Male	Matched	0.0333333	60	NA	NA	NA	NA	NA	NA	NA	NA	NA	NA	YES	NA	NA	NA	WHITE	NA	NA	NA	NA	NA	NA	NA	NA
prad_pik3r1_msk_2021	P-0009399	P-0009399-T01-IM5	prad_pik3r1_msk_2021:P-0009399-T01-IM5	prad_pik3r1_msk_2021:P-0009399	0	NA	Prostate Cancer	Prostate Adenocarcinoma	0.5588	IMPACT410	MSKCC	Pleura	NA	4.1	Indeterminate	5	PRAD	Prostate	Tumor	1	1211	Metastasis	Male	Matched	0.166667	80	NA	NA	NA	NA	NA	NA	NA	NA	NA	NA	YES	NA	NA	NA	WHITE	NA	NA	NA	NA	NA	NA	NA	NA
prad_pik3r1_msk_2021	P-0009401	P-0009401-T01-IM5	prad_pik3r1_msk_2021:P-0009401-T01-IM5	prad_pik3r1_msk_2021:P-0009401	0	NA	Prostate Cancer	Prostate Adenocarcinoma	0.1717	IMPACT410	MSKCC	Lymph Node	NA	1.78	Stable	3	PRAD	Prostate	Tumor	1	184	Metastasis	Male	Matched	0.1	60	NA	NA	NA	NA	NA	NA	NA	NA	NA	NA	YES	NA	NA	NA	WHITE	NA	NA	NA	NA	NA	NA	NA	NA
prad_pik3r1_msk_2021	P-0009402	P-0009402-T02-IM6	prad_pik3r1_msk_2021:P-0009402-T02-IM6	prad_pik3r1_msk_2021:P-0009402	0	NA	Prostate Cancer	Prostate Adenocarcinoma	0.3269	IMPACT468	MSKCC	Liver	MICROSATELLITE STABLE (MSS). See MSI note below.	0.18	Stable	5	PRAD	Prostate	Tumor	1	645	Metastasis	Male	Matched	0.166667	50	NA	NA	NA	NA	NA	NA	NA	NA	NA	NA	YES	NA	NA	NA	WHITE	NA	NA	NA	NA	NA	NA	NA	NA
prad_pik3r1_msk_2021	P-0009463	P-0009463-T01-IM5	prad_pik3r1_msk_2021:P-0009463-T01-IM5	prad_pik3r1_msk_2021:P-0009463	0	NA	Prostate Cancer	Prostate Adenocarcinoma	0.139	IMPACT410	MSKCC	Soft Tissue	NA	0	Stable	2	PRAD	Prostate	Tumor	1	758	Metastasis	Male	Matched	0.0666667	20	NA	NA	NA	NA	NA	NA	NA	NA	NA	NA	YES	NA	NA	NA	PT REFUSED TO ANSWER	NA	NA	NA	NA	NA	NA	NA	NA
prad_pik3r1_msk_2021	P-0009543	P-0009543-T01-IM5	prad_pik3r1_msk_2021:P-0009543-T01-IM5	prad_pik3r1_msk_2021:P-0009543	0	NA	Prostate Cancer	Prostate Adenocarcinoma	0.5193	IMPACT410	MSKCC	Lung	NA	1.72	Stable	2	PRAD	Prostate	Tumor	1	1069	Metastasis	Male	Matched	0.0666667	40	NA	NA	NA	NA	NA	NA	NA	NA	NA	NA	YES	NA	NA	NA	WHITE	NA	NA	NA	NA	NA	NA	NA	NA
prad_pik3r1_msk_2021	P-0009640	P-0009640-T02-IM6	prad_pik3r1_msk_2021:P-0009640-T02-IM6	prad_pik3r1_msk_2021:P-0009640	0	NA	Prostate Cancer	Prostate Adenocarcinoma	0.3193	IMPACT468	MSKCC	Hip	NA	1.04	Do not report	2	PRAD	Prostate	Tumor	1	199	Metastasis	Male	Matched	0.0666667	40	NA	NA	NA	NA	NA	NA	NA	NA	NA	NA	YES	NA	NA	NA	WHITE	NA	NA	NA	NA	NA	NA	NA	NA
prad_pik3r1_msk_2021	P-0009654	P-0009654-T02-IM6	prad_pik3r1_msk_2021:P-0009654-T02-IM6	prad_pik3r1_msk_2021:P-0009654	0	NA	Prostate Cancer	Prostate Adenocarcinoma	0.3903	IMPACT468	MSKCC	Bone	MICROSATELLITE STABLE (MSS). See MSI note below.	0.75	Stable	10	PRAD	Prostate	Tumor	1	692	Metastasis	Male	Matched	0.333333	40	NA	NA	NA	NA	NA	NA	NA	NA	NA	NA	YES	NA	NA	NA	WHITE	NA	NA	NA	NA	NA	NA	NA	NA
prad_pik3r1_msk_2021	P-0009656	P-0009656-T01-IM5	prad_pik3r1_msk_2021:P-0009656-T01-IM5	prad_pik3r1_msk_2021:P-0009656	0	NA	Prostate Cancer	Prostate Adenocarcinoma	0.4492	IMPACT410	MSKCC	Kidney	MICROSATELLITE STABLE (MSS). See MSI note below.	0.86	Stable	3	PRAD	Prostate	Tumor	1	762	Metastasis	Male	Matched	0.1	30	NA	NA	NA	NA	NA	NA	NA	NA	NA	NA	NO	NA	NA	NA	WHITE	NA	NA	NA	NA	NA	NA	NA	NA
prad_pik3r1_msk_2021	P-0009679	P-0009679-T02-IM6	prad_pik3r1_msk_2021:P-0009679-T02-IM6	prad_pik3r1_msk_2021:P-0009679	0	NA	Prostate Cancer	Prostate Adenocarcinoma	0.4483	IMPACT468	MSKCC	Neck	MICROSATELLITE STABLE (MSS). See MSI note below.	0.82	Stable	1	PRAD	Prostate	Tumor	1	832	Metastasis	Male	Matched	0.0333333	60	NA	NA	NA	NA	NA	NA	NA	NA	NA	NA	NO	NA	NA	NA	WHITE	NA	NA	NA	NA	NA	NA	NA	NA
prad_pik3r1_msk_2021	P-0009728	P-0009728-T01-IM5	prad_pik3r1_msk_2021:P-0009728-T01-IM5	prad_pik3r1_msk_2021:P-0009728	0	NA	Prostate Cancer	Prostate Adenocarcinoma	0.0918	IMPACT410	MSKCC	Liver	NA	0.18	Stable	3	PRAD	Prostate	Tumor	1	957	Metastasis	Male	Matched	0.1	30	NA	NA	NA	NA	NA	NA	NA	NA	NA	NA	YES	NA	NA	NA	ASIAN-FAR EAST/INDIAN SUBCONT	NA	NA	NA	NA	NA	NA	NA	NA
prad_pik3r1_msk_2021	P-0009853	P-0009853-T01-IM5	prad_pik3r1_msk_2021:P-0009853-T01-IM5	prad_pik3r1_msk_2021:P-0009853	0	NA	Prostate Cancer	Prostate Adenocarcinoma	0.2129	IMPACT410	MSKCC	Bladder	NA	1	Stable	6	PRAD	Prostate	Tumor	1	932	Metastasis	Male	Matched	0.2	50	NA	NA	NA	NA	NA	NA	NA	NA	NA	NA	YES	NA	NA	NA	WHITE	NA	NA	NA	NA	NA	NA	NA	NA
prad_pik3r1_msk_2021	P-0009908	P-0009908-T01-IM5	prad_pik3r1_msk_2021:P-0009908-T01-IM5	prad_pik3r1_msk_2021:P-0009908	0	NA	Prostate Cancer	Prostate Adenocarcinoma	0.0652	IMPACT410	MSKCC	Lymph Node	NA	0.07	Stable	2	PRAD	Prostate	Tumor	1	872	Metastasis	Male	Matched	0.0666667	40	NA	NA	NA	NA	NA	NA	NA	NA	NA	NA	YES	NA	NA	NA	PT REFUSED TO ANSWER	NA	NA	NA	NA	NA	NA	NA	NA
prad_pik3r1_msk_2021	P-0009982	P-0009982-T01-IM5	prad_pik3r1_msk_2021:P-0009982-T01-IM5	prad_pik3r1_msk_2021:P-0009982	0	NA	Prostate Cancer	Prostate Adenocarcinoma	0.0668	IMPACT410	MSKCC	Bone	NA	0.34	Stable	4	PRAD	Prostate	Tumor	1	1017	Metastasis	Male	Matched	0.133333	20	NA	NA	NA	NA	NA	NA	NA	NA	NA	NA	YES	NA	NA	NA	WHITE	NA	NA	NA	NA	NA	NA	NA	NA
prad_pik3r1_msk_2021	P-0009989	P-0009989-T01-IM5	prad_pik3r1_msk_2021:P-0009989-T01-IM5	prad_pik3r1_msk_2021:P-0009989	0	NA	Prostate Cancer	Prostate Adenocarcinoma	0.3444	IMPACT410	MSKCC	Lymph Node	NA	0.79	Stable	5	PRAD	Prostate	Tumor	1	1140	Metastasis	Male	Matched	0.166667	70	NA	NA	NA	NA	NA	NA	NA	NA	NA	NA	YES	NA	NA	NA	WHITE	NA	NA	NA	NA	NA	NA	NA	NA
prad_pik3r1_msk_2021	P-0010015	P-0010015-T01-IM5	prad_pik3r1_msk_2021:P-0010015-T01-IM5	prad_pik3r1_msk_2021:P-0010015	0	NA	Prostate Cancer	Prostate Adenocarcinoma	0.426	IMPACT410	MSKCC	Lymph Node	NA	1.42	Stable	4	PRAD	Prostate	Tumor	1	1199	Metastasis	Male	Matched	0.133333	80	NA	NA	NA	NA	NA	NA	NA	NA	NA	NA	NO	NA	NA	NA	WHITE	NA	NA	NA	NA	NA	NA	NA	NA
prad_pik3r1_msk_2021	P-0010078	P-0010078-T01-IM5	prad_pik3r1_msk_2021:P-0010078-T01-IM5	prad_pik3r1_msk_2021:P-0010078	0	NA	Prostate Cancer	Prostate Adenocarcinoma	0.3405	IMPACT410	MSKCC	Adrenal Gland	NA	0.38	Stable	5	PRAD	Prostate	Tumor	1	617	Metastasis	Male	Matched	0.166667	30	NA	NA	NA	NA	NA	NA	NA	NA	NA	NA	NO	NA	NA	NA	WHITE	NA	NA	NA	NA	NA	NA	NA	NA
prad_pik3r1_msk_2021	P-0010240	P-0010240-T01-IM5	prad_pik3r1_msk_2021:P-0010240-T01-IM5	prad_pik3r1_msk_2021:P-0010240	0	NA	Prostate Cancer	Prostate Adenocarcinoma	0.0476	IMPACT410	MSKCC	Lymph Node	MICROSATELLITE STABLE (MSS). See MSI note below.	0	Stable	5	PRAD	Prostate	Tumor	1	655	Metastasis	Male	Matched	0.166667	70	NA	NA	NA	NA	NA	NA	NA	NA	NA	NA	YES	NA	NA	NA	WHITE	NA	NA	NA	NA	NA	NA	NA	NA
prad_pik3r1_msk_2021	P-0010272	P-0010272-T01-IM5	prad_pik3r1_msk_2021:P-0010272-T01-IM5	prad_pik3r1_msk_2021:P-0010272	0	NA	Prostate Cancer	Prostate Adenocarcinoma	0.4341	IMPACT410	MSKCC	Bone	NA	0.67	Stable	4	PRAD	Prostate	Tumor	1	889	Metastasis	Male	Matched	0.133333	60	NA	NA	NA	NA	NA	NA	NA	NA	NA	NA	YES	NA	NA	NA	ASIAN-FAR EAST/INDIAN SUBCONT	NA	NA	NA	NA	NA	NA	NA	NA
prad_pik3r1_msk_2021	P-0010309	P-0010309-T01-IM5	prad_pik3r1_msk_2021:P-0010309-T01-IM5	prad_pik3r1_msk_2021:P-0010309	0	NA	Prostate Cancer	Prostate Adenocarcinoma	0.1962	IMPACT410	MSKCC	Lymph Node	NA	0.49	Stable	4	PRAD	Prostate	Tumor	1	1175	Metastasis	Male	Matched	0.133333	30	NA	NA	NA	NA	NA	NA	NA	NA	NA	NA	YES	NA	NA	NA	WHITE	NA	NA	NA	NA	NA	NA	NA	NA
prad_pik3r1_msk_2021	P-0010315	P-0010315-T03-IM5	prad_pik3r1_msk_2021:P-0010315-T03-IM5	prad_pik3r1_msk_2021:P-0010315	0	NA	Prostate Cancer	Prostate Adenocarcinoma	0.157	IMPACT410	MSKCC	NA	NA	0.27	Do not report	3	PRAD	Prostate	Tumor	1	834	Metastasis	Male	Matched	0.1	20	NA	NA	NA	NA	NA	NA	NA	NA	NA	NA	YES	NA	NA	NA	WHITE	NA	NA	NA	NA	NA	NA	NA	NA
prad_pik3r1_msk_2021	P-0010518	P-0010518-T01-IM5	prad_pik3r1_msk_2021:P-0010518-T01-IM5	prad_pik3r1_msk_2021:P-0010518	0	NA	Prostate Cancer	Prostate Adenocarcinoma	0.5777	IMPACT410	MSKCC	Lung	NA	1.15	Stable	7	PRAD	Prostate	Tumor	1	1080	Metastasis	Male	Matched	0.233333	50	NA	NA	NA	NA	NA	NA	NA	NA	NA	NA	NO	NA	NA	NA	WHITE	NA	NA	NA	NA	NA	NA	NA	NA
prad_pik3r1_msk_2021	P-0010523	P-0010523-T01-IM5	prad_pik3r1_msk_2021:P-0010523-T01-IM5	prad_pik3r1_msk_2021:P-0010523	0	NA	Prostate Cancer	Prostate Adenocarcinoma	0.164	IMPACT410	MSKCC	Bone	NA	0.47	Stable	1	PRAD	Prostate	Tumor	1	1336	Metastasis	Male	Matched	0.0333333	30	NA	NA	NA	NA	NA	NA	NA	NA	NA	NA	YES	NA	NA	NA	WHITE	NA	NA	NA	NA	NA	NA	NA	NA
prad_pik3r1_msk_2021	P-0010746	P-0010746-T01-IM5	prad_pik3r1_msk_2021:P-0010746-T01-IM5	prad_pik3r1_msk_2021:P-0010746	0	NA	Prostate Cancer	Prostate Adenocarcinoma	0.1932	IMPACT410	MSKCC	Bone	NA	0.23	Stable	2	PRAD	Prostate	Tumor	1	1191	Metastasis	Male	Matched	0.0666667	30	NA	NA	NA	NA	NA	NA	NA	NA	NA	NA	NO	NA	NA	NA	WHITE	NA	NA	NA	NA	NA	NA	NA	NA
prad_pik3r1_msk_2021	P-0010959	P-0010959-T01-IM5	prad_pik3r1_msk_2021:P-0010959-T01-IM5	prad_pik3r1_msk_2021:P-0010959	0	NA	Prostate Cancer	Prostate Adenocarcinoma	0.1053	IMPACT410	MSKCC	Rectum	NA	0	Stable	3	PRAD	Prostate	Tumor	1	614	Metastasis	Male	Matched	0.1	40	NA	NA	NA	NA	NA	NA	NA	NA	NA	NA	YES	NA	NA	NA	WHITE	NA	NA	NA	NA	NA	NA	NA	NA
prad_pik3r1_msk_2021	P-0011003	P-0011003-T01-IM5	prad_pik3r1_msk_2021:P-0011003-T01-IM5	prad_pik3r1_msk_2021:P-0011003	0	NA	Prostate Cancer	Prostate Adenocarcinoma	0.0881	IMPACT410	MSKCC	Liver	NA	0	Stable	7	PRAD	Prostate	Tumor	1	1267	Metastasis	Male	Matched	0.233333	25	NA	NA	NA	NA	NA	NA	NA	NA	NA	NA	YES	NA	NA	NA	ASIAN-FAR EAST/INDIAN SUBCONT	NA	NA	NA	NA	NA	NA	NA	NA
prad_pik3r1_msk_2021	P-0011088	P-0011088-T01-IM5	prad_pik3r1_msk_2021:P-0011088-T01-IM5	prad_pik3r1_msk_2021:P-0011088	0	NA	Prostate Cancer	Prostate Adenocarcinoma	0.2735	IMPACT410	MSKCC	Lymph Node	NA	1.59	Stable	3	PRAD	Prostate	Tumor	1	1544	Metastasis	Male	Matched	0.1	40	NA	NA	NA	NA	NA	NA	NA	NA	NA	NA	YES	NA	NA	NA	WHITE	NA	NA	NA	NA	NA	NA	NA	NA
prad_pik3r1_msk_2021	P-0011090	P-0011090-T01-IM5	prad_pik3r1_msk_2021:P-0011090-T01-IM5	prad_pik3r1_msk_2021:P-0011090	0	NA	Prostate Cancer	Prostate Adenocarcinoma	0.2085	IMPACT410	MSKCC	Lymph Node	NA	1.1	Stable	5	PRAD	Prostate	Tumor	1	1492	Metastasis	Male	Matched	0.166667	25	NA	NA	NA	NA	NA	NA	NA	NA	NA	NA	NO	NA	NA	NA	WHITE	NA	NA	NA	NA	NA	NA	NA	NA
prad_pik3r1_msk_2021	P-0011093	P-0011093-T01-IM5	prad_pik3r1_msk_2021:P-0011093-T01-IM5	prad_pik3r1_msk_2021:P-0011093	0	NA	Prostate Cancer	Prostate Adenocarcinoma	0.2086	IMPACT410	MSKCC	Bone	NA	1.14	Stable	2	PRAD	Prostate	Tumor	1	911	Metastasis	Male	Matched	0.0666667	10	NA	NA	NA	NA	NA	NA	NA	NA	NA	NA	YES	NA	NA	NA	WHITE	NA	NA	NA	NA	NA	NA	NA	NA
prad_pik3r1_msk_2021	P-0011096	P-0011096-T01-IM5	prad_pik3r1_msk_2021:P-0011096-T01-IM5	prad_pik3r1_msk_2021:P-0011096	0	NA	Prostate Cancer	Prostate Adenocarcinoma	0.3468	IMPACT410	MSKCC	Lymph Node	NA	2.89	Stable	4	PRAD	Prostate	Tumor	1	1269	Metastasis	Male	Matched	0.133333	20	NA	NA	NA	NA	NA	NA	NA	NA	NA	NA	NO	NA	NA	NA	WHITE	NA	NA	NA	NA	NA	NA	NA	NA
prad_pik3r1_msk_2021	P-0011290	P-0011290-T01-IM5	prad_pik3r1_msk_2021:P-0011290-T01-IM5	prad_pik3r1_msk_2021:P-0011290	0	NA	Prostate Cancer	Prostate Adenocarcinoma	0.061	IMPACT410	MSKCC	Sacral Mass	MICROSATELLITE STABLE (MSS). See MSI note below.	0.49	Stable	3	PRAD	Prostate	Tumor	1	753	Metastasis	Male	Matched	0.1	15	NA	NA	NA	NA	NA	NA	NA	NA	NA	NA	YES	NA	NA	NA	BLACK OR AFRICAN AMERICAN	NA	NA	NA	NA	NA	NA	NA	NA
prad_pik3r1_msk_2021	P-0011299	P-0011299-T01-IM5	prad_pik3r1_msk_2021:P-0011299-T01-IM5	prad_pik3r1_msk_2021:P-0011299	0	NA	Prostate Cancer	Prostate Adenocarcinoma	0.0304	IMPACT410	MSKCC	Lymph Node	NA	0.09	Stable	2	PRAD	Prostate	Tumor	1	814	Metastasis	Male	Matched	0.0666667	60	NA	NA	NA	NA	NA	NA	NA	NA	NA	NA	YES	NA	NA	NA	BLACK OR AFRICAN AMERICAN	NA	NA	NA	NA	NA	NA	NA	NA
prad_pik3r1_msk_2021	P-0011367	P-0011367-T01-IM5	prad_pik3r1_msk_2021:P-0011367-T01-IM5	prad_pik3r1_msk_2021:P-0011367	0	NA	Prostate Cancer	Prostate Adenocarcinoma	0.3809	IMPACT410	MSKCC	Bone	NA	0.72	Stable	2	PRAD	Prostate	Tumor	1	1042	Metastasis	Male	Matched	0.0666667	80	NA	NA	NA	NA	NA	NA	NA	NA	NA	NA	YES	NA	NA	NA	WHITE	NA	NA	NA	NA	NA	NA	NA	NA
prad_pik3r1_msk_2021	P-0011368	P-0011368-T01-IM5	prad_pik3r1_msk_2021:P-0011368-T01-IM5	prad_pik3r1_msk_2021:P-0011368	0	NA	Prostate Cancer	Prostate Adenocarcinoma	0.0491	IMPACT410	MSKCC	Pelvis	MICROSATELLITE STABLE (MSS). See MSI note below.	0.17	Stable	3	PRAD	Prostate	Tumor	1	1195	Metastasis	Male	Matched	0.1	30	NA	NA	NA	NA	NA	NA	NA	NA	NA	NA	YES	NA	NA	NA	WHITE	NA	NA	NA	NA	NA	NA	NA	NA
prad_pik3r1_msk_2021	P-0011377	P-0011377-T01-IM5	prad_pik3r1_msk_2021:P-0011377-T01-IM5	prad_pik3r1_msk_2021:P-0011377	0	NA	Prostate Cancer	Prostate Adenocarcinoma	0.1621	IMPACT410	MSKCC	Lymph Node	NA	1.03	Stable	4	PRAD	Prostate	Tumor	1	894	Metastasis	Male	Matched	0.133333	70	NA	NA	NA	NA	NA	NA	NA	NA	NA	NA	YES	NA	NA	NA	WHITE	NA	NA	NA	NA	NA	NA	NA	NA
prad_pik3r1_msk_2021	P-0011483	P-0011483-T01-IM5	prad_pik3r1_msk_2021:P-0011483-T01-IM5	prad_pik3r1_msk_2021:P-0011483	0	NA	Prostate Cancer	Prostate Adenocarcinoma	0.2114	IMPACT410	MSKCC	Lung	NA	0.3	Stable	4	PRAD	Prostate	Tumor	1	962	Metastasis	Male	Matched	0.133333	60	NA	NA	NA	NA	NA	NA	NA	NA	NA	NA	NO	NA	NA	NA	BLACK OR AFRICAN AMERICAN	NA	NA	NA	NA	NA	NA	NA	NA
prad_pik3r1_msk_2021	P-0011534	P-0011534-T01-IM5	prad_pik3r1_msk_2021:P-0011534-T01-IM5	prad_pik3r1_msk_2021:P-0011534	0	NA	Prostate Cancer	Prostate Adenocarcinoma	0.0262	IMPACT410	MSKCC	Lymph Node	NA	0	Stable	1	PRAD	Prostate	Tumor	1	799	Metastasis	Male	Matched	0.0333333	30	NA	NA	NA	NA	NA	NA	NA	NA	NA	NA	YES	NA	NA	NA	WHITE	NA	NA	NA	NA	NA	NA	NA	NA
prad_pik3r1_msk_2021	P-0012109	P-0012109-T01-IM5	prad_pik3r1_msk_2021:P-0012109-T01-IM5	prad_pik3r1_msk_2021:P-0012109	0	NA	Prostate Cancer	Prostate Adenocarcinoma	0.5739	IMPACT410	MSKCC	Liver	NA	2.72	Stable	5	PRAD	Prostate	Tumor	1	1001	Metastasis	Male	Matched	0.166667	60	NA	NA	NA	NA	NA	NA	NA	NA	NA	NA	YES	NA	NA	NA	WHITE	NA	NA	NA	NA	NA	NA	NA	NA
prad_pik3r1_msk_2021	P-0012258	P-0012258-T01-IM5	prad_pik3r1_msk_2021:P-0012258-T01-IM5	prad_pik3r1_msk_2021:P-0012258	0	NA	Prostate Cancer	Prostate Adenocarcinoma	0.1771	IMPACT410	MSKCC	Lymph Node	NA	0.08	Stable	3	PRAD	Prostate	Tumor	1	566	Metastasis	Male	Matched	0.1	50	NA	NA	NA	NA	NA	NA	NA	NA	NA	NA	YES	NA	NA	NA	ASIAN-FAR EAST/INDIAN SUBCONT	NA	NA	NA	NA	NA	NA	NA	NA
prad_pik3r1_msk_2021	P-0012513	P-0012513-T01-IM5	prad_pik3r1_msk_2021:P-0012513-T01-IM5	prad_pik3r1_msk_2021:P-0012513	0	NA	Prostate Cancer	Prostate Adenocarcinoma	0.1019	IMPACT410	MSKCC	Lymph Node	NA	0.16	Stable	6	PRAD	Prostate	Tumor	1	772	Metastasis	Male	Matched	0.2	60	NA	NA	NA	NA	NA	NA	NA	NA	NA	NA	YES	NA	NA	NA	WHITE	NA	NA	NA	NA	NA	NA	NA	NA
prad_pik3r1_msk_2021	P-0012555	P-0012555-T01-IM5	prad_pik3r1_msk_2021:P-0012555-T01-IM5	prad_pik3r1_msk_2021:P-0012555	0	NA	Prostate Cancer	Prostate Adenocarcinoma	0.1184	IMPACT410	MSKCC	Lymph Node	NA	0.28	Stable	1	PRAD	Prostate	Tumor	1	1036	Metastasis	Male	Matched	0.0333333	60	NA	NA	NA	NA	NA	NA	NA	NA	NA	NA	YES	NA	NA	NA	WHITE	NA	NA	NA	NA	NA	NA	NA	NA
prad_pik3r1_msk_2021	P-0012630	P-0012630-T01-IM5	prad_pik3r1_msk_2021:P-0012630-T01-IM5	prad_pik3r1_msk_2021:P-0012630	0	NA	Prostate Cancer	Prostate Adenocarcinoma	0.2618	IMPACT410	MSKCC	Lymph Node	NA	0.15	Stable	2	PRAD	Prostate	Tumor	1	636	Metastasis	Male	Matched	0.0666667	60	NA	NA	NA	NA	NA	NA	NA	NA	NA	NA	NO	NA	NA	NA	WHITE	NA	NA	NA	NA	NA	NA	NA	NA
prad_pik3r1_msk_2021	P-0012643	P-0012643-T01-IM5	prad_pik3r1_msk_2021:P-0012643-T01-IM5	prad_pik3r1_msk_2021:P-0012643	0	NA	Prostate Cancer	Prostate Adenocarcinoma	0.4849	IMPACT410	MSKCC	Bone	NA	1.11	Stable	3	PRAD	Prostate	Tumor	1	1015	Metastasis	Male	Matched	0.1	60	NA	NA	NA	NA	NA	NA	NA	NA	NA	NA	YES	NA	NA	NA	WHITE	NA	NA	NA	NA	NA	NA	NA	NA
[truncated: 5,497 more rows]
[truncated: 114 more columns]
