# Supplementary material for: Integrated Genomic Analysis of Primary Prostate Tumor Foci and Corresponding Lymph Node Metastases Identifies Mutations and Pathways Associated with Metastasis
Source: Preprints.org preprint supplement (doi:10.20944/preprints202310.1586.v1), 2023-10-25
Supplement: Supplementary file 5 [file Table_S14_genes_enriched_in_mets_or_primary.xlsx]

## Sheet: Table_S14_genes_enriched_in_met
Gene	Cytoband	(A) Metastasis	(B) Primary	Log2 Ratio	p-Value	q-Value	Enriched in
AR	Xq12	975 (35.83%)	58 (1.48%)	4.6	0	0	(A) Metastasis
TP53	17p13.1	1074 (39.47%)	779 (19.83%)	0.99	1.73e-68	1.99e-64	(A) Metastasis
GAGE12H	Xp11.23	49 (24.75%)	0 (0.00%)	>10	4.72e-68	3.62e-64	(A) Metastasis
PTEN	10q23.31	839 (30.83%)	570 (14.51%)	1.09	4.77e-57	2.74e-53	(A) Metastasis
MT-ND5	mitochondria	30 (20.00%)	0 (0.00%)	>10	4.58e-45	2.11e-41	(A) Metastasis
MT-CYB	mitochondria	28 (18.67%)	0 (0.00%)	>10	5.1e-42	1.95e-38	(A) Metastasis
DLEU7-AS1	13q14.3	0 (0.00%)	49 (9.92%)	<-10	1.7e-41	4.35e-38	(B) Primary
LRRC63	13q14.13	0 (0.00%)	49 (9.92%)	<-10	1.7e-41	4.35e-38	(B) Primary
RNASEH2B-AS1	13q14.3	0 (0.00%)	49 (9.92%)	<-10	1.7e-41	4.35e-38	(B) Primary
HTR2A-AS1	13q14.2	0 (0.00%)	48 (9.72%)	<-10	1.21e-40	2.31e-37	(B) Primary
INTS6-AS1	13q14.3	0 (0.00%)	48 (9.72%)	<-10	1.21e-40	2.31e-37	(B) Primary
LINC00563	13q14.13	0 (0.00%)	48 (9.72%)	<-10	1.21e-40	2.31e-37	(B) Primary
LINC01700	21q22.2	0 (0.00%)	47 (9.51%)	<-10	8.57e-40	1.41e-36	(B) Primary
MRPS31P5	13q14.3	0 (0.00%)	47 (9.51%)	<-10	8.57e-40	1.41e-36	(B) Primary
LINC00462	13q14.2	0 (0.00%)	46 (9.31%)	<-10	6.06e-39	8.19e-36	(B) Primary
MED4-AS1	13q14.2	0 (0.00%)	46 (9.31%)	<-10	6.06e-39	8.19e-36	(B) Primary
RB1-DT	13q14.2	0 (0.00%)	46 (9.31%)	<-10	6.06e-39	8.19e-36	(B) Primary
MANEA-DT	6q16.1	0 (0.00%)	45 (9.11%)	<-10	4.28e-38	5.46e-35	(B) Primary
GAGE6	Xp11.4-p11.2	55 (36.67%)	1 (0.20%)	7.5	9.08e-38	1.1e-34	(A) Metastasis
MT-ND4	mitochondria	25 (16.67%)	0 (0.00%)	>10	1.78e-37	2.04e-34	(A) Metastasis
LIN28B-AS1	6q16.3	0 (0.00%)	44 (8.91%)	<-10	3.01e-37	2.89e-34	(B) Primary
SMIM2-AS1	13q14.11	0 (0.00%)	44 (8.91%)	<-10	3.01e-37	2.89e-34	(B) Primary
SMIM2-IT1	13q14.11	0 (0.00%)	44 (8.91%)	<-10	3.01e-37	2.89e-34	(B) Primary
TUSC8	13q14.11	0 (0.00%)	44 (8.91%)	<-10	3.01e-37	2.89e-34	(B) Primary
AMER1	Xq11.2	154 (6.45%)	22 (0.68%)	3.25	1.17e-36	1.08e-33	(A) Metastasis
MT-CO1	mitochondria	24 (16.00%)	0 (0.00%)	>10	5.73e-36	5.06e-33	(A) Metastasis
BRWD1-AS1	21q22.2	0 (0.00%)	42 (8.50%)	<-10	1.49e-35	1.14e-32	(B) Primary
CCAT1	8q24.21	0 (0.00%)	42 (8.50%)	<-10	1.49e-35	1.14e-32	(B) Primary
DSCAM-IT1	21q22.2	0 (0.00%)	42 (8.50%)	<-10	1.49e-35	1.14e-32	(B) Primary
PRNCR1	8q24.21	0 (0.00%)	42 (8.50%)	<-10	1.49e-35	1.14e-32	(B) Primary
YIPF6	Xq12-q13.1	77 (14.50%)	5 (0.43%)	5.09	9.22e-35	6.66e-32	(A) Metastasis
ARMC2-AS1	6q21	0 (0.00%)	41 (8.30%)	<-10	1.04e-34	6.66e-32	(B) Primary
CCAT2	8q24.21	0 (0.00%)	41 (8.30%)	<-10	1.04e-34	6.66e-32	(B) Primary
LINC00458	13q14.3	0 (0.00%)	41 (8.30%)	<-10	1.04e-34	6.66e-32	(B) Primary
LINC00534	8q21.3	0 (0.00%)	41 (8.30%)	<-10	1.04e-34	6.66e-32	(B) Primary
LINC00558	13q14.3	0 (0.00%)	41 (8.30%)	<-10	1.04e-34	6.66e-32	(B) Primary
RB1	13q14.2	308 (11.32%)	141 (3.59%)	1.66	1.3e-34	8.07e-32	(A) Metastasis
CT47A9	Xq24	23 (15.33%)	0 (0.00%)	>10	1.83e-34	1.11e-31	(A) Metastasis
HEPH	Xq12	85 (16.01%)	10 (0.85%)	4.23	2.48e-34	1.46e-31	(A) Metastasis
LINC01111	8q21.13	0 (0.00%)	40 (8.10%)	<-10	7.29e-34	4.19e-31	(B) Primary
VSIG4	Xq12	77 (14.50%)	6 (0.51%)	4.83	9.24e-34	5.18e-31	(A) Metastasis
GAGE12B	Xp11.23	49 (32.67%)	1 (0.20%)	7.33	3.81e-33	2.04e-30	(A) Metastasis
GAGE12G	Xp11.23	49 (32.67%)	1 (0.20%)	7.33	3.81e-33	2.04e-30	(A) Metastasis
GAGE12C	Xp11.23	48 (32.00%)	1 (0.20%)	7.3	2.18e-32	1.09e-29	(A) Metastasis
GAGE12D	Xp11.23	48 (32.00%)	1 (0.20%)	7.3	2.18e-32	1.09e-29	(A) Metastasis
GAGE12E	Xp11.23	48 (32.00%)	1 (0.20%)	7.3	2.18e-32	1.09e-29	(A) Metastasis
CASC9	8q21.13	0 (0.00%)	38 (7.69%)	<-10	3.55e-32	1.63e-29	(B) Primary
LINC00332	13q14.11	0 (0.00%)	38 (7.69%)	<-10	3.55e-32	1.63e-29	(B) Primary
LINC01030	8q21.3	0 (0.00%)	38 (7.69%)	<-10	3.55e-32	1.63e-29	(B) Primary
LINC02912		0 (0.00%)	38 (7.69%)	<-10	3.55e-32	1.63e-29	(B) Primary
C4ORF46P3		0 (0.00%)	37 (7.49%)	<-10	2.47e-31	1.01e-28	(B) Primary
DIAPH3-AS1	13q21.2	0 (0.00%)	37 (7.49%)	<-10	2.47e-31	1.01e-28	(B) Primary
FER1L6-AS2	8q24.13	0 (0.00%)	37 (7.49%)	<-10	2.47e-31	1.01e-28	(B) Primary
LINC00378	13q21.2	0 (0.00%)	37 (7.49%)	<-10	2.47e-31	1.01e-28	(B) Primary
OTUD6B-AS1	8q21.3	0 (0.00%)	37 (7.49%)	<-10	2.47e-31	1.01e-28	(B) Primary
RNF139-DT		0 (0.00%)	37 (7.49%)	<-10	2.47e-31	1.01e-28	(B) Primary
EIF1AY	Yq11.223	15 (31.25%)	0 (0.00%)	>10	1.49e-30	5.91e-28	(A) Metastasis
TXLNGY	Yq11.222-q11.223	15 (31.25%)	0 (0.00%)	>10	1.49e-30	5.91e-28	(A) Metastasis
DIAPH3-AS2	13q21.2	0 (0.00%)	36 (7.29%)	<-10	1.71e-30	6.45e-28	(B) Primary
LINC01603	8q13.2	0 (0.00%)	36 (7.29%)	<-10	1.71e-30	6.45e-28	(B) Primary
RNU6-83P	13q32.3	0 (0.00%)	36 (7.29%)	<-10	1.71e-30	6.45e-28	(B) Primary
MT-ND1	mitochondria	20 (13.33%)	0 (0.00%)	>10	5.69e-30	2.11e-27	(A) Metastasis
STARD8	Xq13.1	71 (13.37%)	7 (0.60%)	4.49	9.41e-30	3.43e-27	(A) Metastasis
LINC03093		0 (0.00%)	35 (7.09%)	<-10	1.19e-29	4.19e-27	(B) Primary
LZTS1-AS1	8p21.3	0 (0.00%)	35 (7.09%)	<-10	1.19e-29	4.19e-27	(B) Primary
FRMD8P1	Xq12	49 (32.67%)	4 (0.81%)	5.33	1.29e-29	4.49e-27	(A) Metastasis
LAS1L	Xq12	67 (12.62%)	5 (0.43%)	4.89	1.49e-29	5.09e-27	(A) Metastasis
LINC00358	13q21.31	0 (0.00%)	34 (6.88%)	<-10	8.2e-29	2.69e-26	(B) Primary
LINC00366	13q13.3	0 (0.00%)	34 (6.88%)	<-10	8.2e-29	2.69e-26	(B) Primary
LINC03020		0 (0.00%)	34 (6.88%)	<-10	8.2e-29	2.69e-26	(B) Primary
DAZ2	Yq11.223	14 (29.17%)	0 (0.00%)	>10	1.74e-28	5.4e-26	(A) Metastasis
DAZ4	Yq11.23	14 (29.17%)	0 (0.00%)	>10	1.74e-28	5.4e-26	(A) Metastasis
RBMY1A1	Yq11.223	14 (29.17%)	0 (0.00%)	>10	1.74e-28	5.4e-26	(A) Metastasis
RBMY1E	Yq11.223	14 (29.17%)	0 (0.00%)	>10	1.74e-28	5.4e-26	(A) Metastasis
MSN	Xq12	66 (12.43%)	6 (0.51%)	4.6	4.2e-28	1.29e-25	(A) Metastasis
APC	5q22.2	338 (12.42%)	196 (5.00%)	1.31	2.01e-27	6.09e-25	(A) Metastasis
LINC00395	13q21.31	0 (0.00%)	32 (6.48%)	<-10	3.9e-27	1.16e-24	(B) Primary
NRG1-IT3	8p12	0 (0.00%)	31 (6.28%)	<-10	2.68e-26	7.8e-24	(B) Primary
TONSL-AS1	8q24.3	0 (0.00%)	31 (6.28%)	<-10	2.68e-26	7.8e-24	(B) Primary
IQANK1	8q24.3	0 (0.00%)	30 (6.07%)	<-10	1.84e-25	4.98e-23	(B) Primary
LINC00571	13q13.3	0 (0.00%)	30 (6.07%)	<-10	1.84e-25	4.98e-23	(B) Primary
NRG1-IT1	8p12	0 (0.00%)	30 (6.07%)	<-10	1.84e-25	4.98e-23	(B) Primary
PCDH9-AS2	13q21.32	0 (0.00%)	30 (6.07%)	<-10	1.84e-25	4.98e-23	(B) Primary
PCDH9-AS3	13q21.32	0 (0.00%)	30 (6.07%)	<-10	1.84e-25	4.98e-23	(B) Primary
PCDH9-AS4	13q21.32	0 (0.00%)	30 (6.07%)	<-10	1.84e-25	4.98e-23	(B) Primary
CDC42P3	8q24.3	0 (0.00%)	29 (5.87%)	<-10	1.26e-24	3.33e-22	(B) Primary
FAM87A	8p23.3	0 (0.00%)	29 (5.87%)	<-10	1.26e-24	3.33e-22	(B) Primary
PJA1	Xq13.1	57 (10.73%)	5 (0.43%)	4.66	1.85e-24	4.84e-22	(A) Metastasis
MYC	8q24.21	312 (11.47%)	185 (4.72%)	1.28	2.12e-24	5.47e-22	(A) Metastasis
CD24	6q21	12 (25.00%)	0 (0.00%)	>10	2.17e-24	5.53e-22	(A) Metastasis
MTMR8	Xq11.2	56 (10.55%)	5 (0.43%)	4.63	5.9e-24	1.49e-21	(A) Metastasis
DLGAP2-AS1	8p23.3	0 (0.00%)	28 (5.67%)	<-10	8.63e-24	2.11e-21	(B) Primary
LINC00348	13q21.33	0 (0.00%)	28 (5.67%)	<-10	8.63e-24	2.11e-21	(B) Primary
LINC02113	5q21.1	0 (0.00%)	28 (5.67%)	<-10	8.63e-24	2.11e-21	(B) Primary
EDA2R	Xq12	96 (18.08%)	5 (1.01%)	4.16	1.39e-23	3.36e-21	(A) Metastasis
FAM90A2P	8p23.1	0 (0.00%)	27 (5.47%)	<-10	5.89e-23	1.36e-20	(B) Primary
LINC00681	8p23.1	0 (0.00%)	27 (5.47%)	<-10	5.89e-23	1.36e-20	(B) Primary
USP17L7	8p23.1	0 (0.00%)	27 (5.47%)	<-10	5.89e-23	1.36e-20	(B) Primary
YTHDF3-DT	8q12.3	0 (0.00%)	27 (5.47%)	<-10	5.89e-23	1.36e-20	(B) Primary
VXN	8q13.1	62 (11.68%)	55 (1.80%)	2.7	5.91e-23	1.36e-20	(A) Metastasis
MUC4	3q29	106 (19.96%)	52 (4.43%)	2.17	1.37e-22	3.11e-20	(A) Metastasis
PTPRN2	7q36.3	38 (7.16%)	19 (0.48%)	3.88	1.78e-22	4.01e-20	(A) Metastasis
RPS4Y1	Yp11.2	11 (22.92%)	0 (0.00%)	>10	2.32e-22	5.13e-20	(A) Metastasis
TMSB4Y	Yq11.221	11 (22.92%)	0 (0.00%)	>10	2.32e-22	5.13e-20	(A) Metastasis
GAGE4	Xp11.4-p11.2	40 (20.20%)	1 (0.20%)	6.64	2.63e-22	5.64e-20	(A) Metastasis
GAGE5	Xp11.4-p11.2	40 (20.20%)	1 (0.20%)	6.64	2.63e-22	5.64e-20	(A) Metastasis
GAGE7	Xp11.4-p11.2	40 (20.20%)	1 (0.20%)	6.64	2.63e-22	5.64e-20	(A) Metastasis
LINC00381	13q22.1	0 (0.00%)	26 (5.26%)	<-10	4.01e-22	8.31e-20	(B) Primary
LINC00877	3p13	0 (0.00%)	26 (5.26%)	<-10	4.01e-22	8.31e-20	(B) Primary
LINC01081	16q24.1	0 (0.00%)	26 (5.26%)	<-10	4.01e-22	8.31e-20	(B) Primary
LINC02905	8p23.1	0 (0.00%)	26 (5.26%)	<-10	4.01e-22	8.31e-20	(B) Primary
KLF8	Xp11.21	16 (8.08%)	0 (0.00%)	>10	4.35e-22	8.93e-20	(A) Metastasis
SPIN4	Xq11.1	41 (20.71%)	2 (0.40%)	5.68	1.07e-21	2.18e-19	(A) Metastasis
ATAD1	10q23.31	106 (3.90%)	148 (12.49%)	-1.68	1.19e-21	2.4e-19	(B) Primary
DEFA11P	8p23.1	0 (0.00%)	25 (5.06%)	<-10	2.73e-21	5.02e-19	(B) Primary
LINC01082	16q24.1	0 (0.00%)	25 (5.06%)	<-10	2.73e-21	5.02e-19	(B) Primary
LINC01301	8q12.1	0 (0.00%)	25 (5.06%)	<-10	2.73e-21	5.02e-19	(B) Primary
LMO7DN	13q22.2	0 (0.00%)	25 (5.06%)	<-10	2.73e-21	5.02e-19	(B) Primary
PRR23D1	8p23.1	0 (0.00%)	25 (5.06%)	<-10	2.73e-21	5.02e-19	(B) Primary
PRR23D2	8p23.1	0 (0.00%)	25 (5.06%)	<-10	2.73e-21	5.02e-19	(B) Primary
SDR16C6P	8q12.1	0 (0.00%)	25 (5.06%)	<-10	2.73e-21	5.02e-19	(B) Primary
USP17L1	8p23.1	0 (0.00%)	25 (5.06%)	<-10	2.73e-21	5.02e-19	(B) Primary
USP17L3	8p23.1	0 (0.00%)	25 (5.06%)	<-10	2.73e-21	5.02e-19	(B) Primary
USP17L4	8p23.1	0 (0.00%)	25 (5.06%)	<-10	2.73e-21	5.02e-19	(B) Primary
USP17L8	8p23.1	0 (0.00%)	25 (5.06%)	<-10	2.73e-21	5.02e-19	(B) Primary
LINC01278	Xq11.1	34 (22.67%)	2 (0.40%)	5.81	5.38e-21	9.82e-19	(A) Metastasis
ASB12	Xq11.2	50 (9.42%)	5 (0.43%)	4.47	5.77e-21	1.04e-18	(A) Metastasis
RPS4Y2	Yq11.223	15 (31.25%)	2 (0.17%)	7.52	9.94e-21	1.79e-18	(A) Metastasis
GAGE12I	Xp11.23	37 (18.69%)	1 (0.20%)	6.53	1.66e-20	2.95e-18	(A) Metastasis
LINC03054		0 (0.00%)	24 (4.86%)	<-10	1.85e-20	3.25e-18	(B) Primary
MYCBP2-AS1	13q22.3	0 (0.00%)	24 (4.86%)	<-10	1.85e-20	3.25e-18	(B) Primary
ARHGEF9	Xq11.1	47 (8.85%)	4 (0.34%)	4.7	2.33e-20	4.06e-18	(A) Metastasis
GAGE12F	Xp11.23	31 (20.67%)	1 (0.20%)	6.67	4.66e-20	8.05e-18	(A) Metastasis
IGBP1	Xq13.1	29 (14.65%)	6 (0.51%)	4.84	4.84e-20	8.3e-18	(A) Metastasis
ACOD1	13q22.3	0 (0.00%)	23 (4.66%)	<-10	1.26e-19	2.06e-17	(B) Primary
DEFA8P	8p23.1	0 (0.00%)	23 (4.66%)	<-10	1.26e-19	2.06e-17	(B) Primary
DEFA9P	8p23.1	0 (0.00%)	23 (4.66%)	<-10	1.26e-19	2.06e-17	(B) Primary
IL6ST-DT		0 (0.00%)	23 (4.66%)	<-10	1.26e-19	2.06e-17	(B) Primary
MAFTRR	16q23.2	0 (0.00%)	23 (4.66%)	<-10	1.26e-19	2.06e-17	(B) Primary
NCKAP5-AS2	2q21.2	0 (0.00%)	23 (4.66%)	<-10	1.26e-19	2.06e-17	(B) Primary
USP51	Xp11.21	14 (7.07%)	0 (0.00%)	>10	2.19e-19	3.56e-17	(A) Metastasis
LINC01229	16q23.2	0 (0.00%)	22 (4.45%)	<-10	8.5e-19	1.36e-16	(B) Primary
LINC01950	5q21.3	0 (0.00%)	22 (4.45%)	<-10	8.5e-19	1.36e-16	(B) Primary
PSMD7-DT	16q23.1	0 (0.00%)	22 (4.45%)	<-10	8.5e-19	1.36e-16	(B) Primary
GAGE2D	Xp11.23	29 (19.33%)	1 (0.20%)	6.58	1.13e-18	1.8e-16	(A) Metastasis
PRDM14	8q13.3	211 (10.86%)	130 (4.30%)	1.34	1.3e-18	2.05e-16	(A) Metastasis
C5ORF67	5q11.2	0 (0.00%)	21 (4.25%)	<-10	5.74e-18	8.56e-16	(B) Primary
CD109-AS1		0 (0.00%)	21 (4.25%)	<-10	5.74e-18	8.56e-16	(B) Primary
KCNQ5-AS1	6q13	0 (0.00%)	21 (4.25%)	<-10	5.74e-18	8.56e-16	(B) Primary
LINC01227	16q23.2	0 (0.00%)	21 (4.25%)	<-10	5.74e-18	8.56e-16	(B) Primary
LINC01412	2q22.3	0 (0.00%)	21 (4.25%)	<-10	5.74e-18	8.56e-16	(B) Primary
LINC01948	5q11.2	0 (0.00%)	21 (4.25%)	<-10	5.74e-18	8.56e-16	(B) Primary
LINC02108	5q11.2	0 (0.00%)	21 (4.25%)	<-10	5.74e-18	8.56e-16	(B) Primary
MEI4	6q14.1	0 (0.00%)	21 (4.25%)	<-10	5.74e-18	8.56e-16	(B) Primary
TBC1D10C	11q13.2	41 (7.72%)	40 (1.02%)	2.92	7.37e-18	1.09e-15	(A) Metastasis
ELOC	8q21.11	227 (8.81%)	136 (3.64%)	1.28	7.38e-18	1.09e-15	(A) Metastasis
LINC00491	5q21.1	0 (0.00%)	20 (4.05%)	<-10	3.87e-17	5.48e-15	(B) Primary
LINC00492	5q21.1	0 (0.00%)	20 (4.05%)	<-10	3.87e-17	5.48e-15	(B) Primary
LINC01080	13q31.1	0 (0.00%)	20 (4.05%)	<-10	3.87e-17	5.48e-15	(B) Primary
LINC02101	5q11.2	0 (0.00%)	20 (4.05%)	<-10	3.87e-17	5.48e-15	(B) Primary
LINC02115	5q21.2	0 (0.00%)	20 (4.05%)	<-10	3.87e-17	5.48e-15	(B) Primary
OCLNP1	5q13.2	0 (0.00%)	20 (4.05%)	<-10	3.87e-17	5.48e-15	(B) Primary
RNLS	10q23.31	109 (20.53%)	166 (7.39%)	1.47	4.19e-17	5.9e-15	(A) Metastasis
CENPE	4q24	14 (0.66%)	63 (5.32%)	-3	8.05e-17	1.13e-14	(B) Primary
SKIL	3q26.2	44 (8.29%)	53 (1.35%)	2.62	8.32e-17	1.16e-14	(A) Metastasis
HTR1E	6q14.3	32 (2.81%)	134 (11.41%)	-2.02	1.12e-16	1.55e-14	(B) Primary
C13ORF42	13q14.3	1 (0.16%)	48 (9.72%)	-5.88	1.44e-16	1.98e-14	(B) Primary
ZC3H12B	Xq11.2-q12	69 (12.99%)	4 (0.81%)	4	1.63e-16	2.23e-14	(A) Metastasis
FGF4	11q13.3	127 (4.67%)	52 (1.33%)	1.81	1.99e-16	2.71e-14	(A) Metastasis
BPY2C	Yq11.23	8 (16.67%)	0 (0.00%)	>10	2.45e-16	3.21e-14	(A) Metastasis
AK6	5q13.2	0 (0.00%)	19 (3.85%)	<-10	2.6e-16	3.21e-14	(B) Primary
EDNRB-AS1	13q22.3	0 (0.00%)	19 (3.85%)	<-10	2.6e-16	3.21e-14	(B) Primary
LINC00331	13q31.1	0 (0.00%)	19 (3.85%)	<-10	2.6e-16	3.21e-14	(B) Primary
LINC00423	13q13.1	0 (0.00%)	19 (3.85%)	<-10	2.6e-16	3.21e-14	(B) Primary
LINC00446	13q22.3	0 (0.00%)	19 (3.85%)	<-10	2.6e-16	3.21e-14	(B) Primary
LINC01069	13q22.3	0 (0.00%)	19 (3.85%)	<-10	2.6e-16	3.21e-14	(B) Primary
LINC01087	2q21.1	0 (0.00%)	19 (3.85%)	<-10	2.6e-16	3.21e-14	(B) Primary
LINC01920	2q23.3	0 (0.00%)	19 (3.85%)	<-10	2.6e-16	3.21e-14	(B) Primary
LINC02219	5q13.1	0 (0.00%)	19 (3.85%)	<-10	2.6e-16	3.21e-14	(B) Primary
LINC02225	5q11.2	0 (0.00%)	19 (3.85%)	<-10	2.6e-16	3.21e-14	(B) Primary
LINC02229	5q12.3	0 (0.00%)	19 (3.85%)	<-10	2.6e-16	3.21e-14	(B) Primary
LINC02612	2q23.3	0 (0.00%)	19 (3.85%)	<-10	2.6e-16	3.21e-14	(B) Primary
NDFIP2-AS1	13q31.1	0 (0.00%)	19 (3.85%)	<-10	2.6e-16	3.21e-14	(B) Primary
OBI1-AS1	13q22.3-q31.1	0 (0.00%)	19 (3.85%)	<-10	2.6e-16	3.21e-14	(B) Primary
RNU6-81P	13q21.31	0 (0.00%)	19 (3.85%)	<-10	2.6e-16	3.21e-14	(B) Primary
RUNDC3A-AS1	17q21.31	0 (0.00%)	19 (3.85%)	<-10	2.6e-16	3.21e-14	(B) Primary
NBN	8q21.3	209 (7.68%)	126 (3.22%)	1.26	4.59e-16	5.64e-14	(A) Metastasis
ZMIZ1	10q22.3	65 (12.24%)	26 (2.21%)	2.47	5.08e-16	6.21e-14	(A) Metastasis
CTSE	1q32.1	30 (5.65%)	12 (0.42%)	3.75	6.05e-16	7.36e-14	(A) Metastasis
GAGE2B	Xp11.23	29 (14.65%)	1 (0.20%)	6.18	8.25e-16	9.92e-14	(A) Metastasis
GAGE2C	Xp11.23	29 (14.65%)	1 (0.20%)	6.18	8.25e-16	9.92e-14	(A) Metastasis
CT47A7	Xq24	26 (17.33%)	2 (0.40%)	5.42	1.45e-15	1.73e-13	(A) Metastasis
C5ORF64-AS1	5q12.1	0 (0.00%)	18 (3.64%)	<-10	1.75e-15	1.98e-13	(B) Primary
DARS1-AS1	2q21.3	0 (0.00%)	18 (3.64%)	<-10	1.75e-15	1.98e-13	(B) Primary
FRY-AS1	13q13.1	0 (0.00%)	18 (3.64%)	<-10	1.75e-15	1.98e-13	(B) Primary
LINC00501	3q26.32	0 (0.00%)	18 (3.64%)	<-10	1.75e-15	1.98e-13	(B) Primary
LINC00578	3q26.32	0 (0.00%)	18 (3.64%)	<-10	1.75e-15	1.98e-13	(B) Primary
LINC01180	17q21.31	0 (0.00%)	18 (3.64%)	<-10	1.75e-15	1.98e-13	(B) Primary
LINC01856	2q21.1	0 (0.00%)	18 (3.64%)	<-10	1.75e-15	1.98e-13	(B) Primary
LINC02056	5q13.2	0 (0.00%)	18 (3.64%)	<-10	1.75e-15	1.98e-13	(B) Primary
MMADHC-DT	2q23.3	0 (0.00%)	18 (3.64%)	<-10	1.75e-15	1.98e-13	(B) Primary
SMIM15-AS1	5q12.1	0 (0.00%)	18 (3.64%)	<-10	1.75e-15	1.98e-13	(B) Primary
STARD13-AS	13q13.1	0 (0.00%)	18 (3.64%)	<-10	1.75e-15	1.98e-13	(B) Primary
SFTPD	10q22.3	58 (10.92%)	21 (1.79%)	2.61	2.93e-15	3.3e-13	(A) Metastasis
SNORD115-19	15q11.2	10 (6.67%)	0 (0.00%)	>10	3.37e-15	3.7e-13	(A) Metastasis
SNORD115-21	15q11.2	10 (6.67%)	0 (0.00%)	>10	3.37e-15	3.7e-13	(A) Metastasis
SNORD115-42	15q11.2	10 (6.67%)	0 (0.00%)	>10	3.37e-15	3.7e-13	(A) Metastasis
SNORD115-43	15q11.2	10 (6.67%)	0 (0.00%)	>10	3.37e-15	3.7e-13	(A) Metastasis
SNORD115-9	15q11.2	10 (6.67%)	0 (0.00%)	>10	3.37e-15	3.7e-13	(A) Metastasis
NFASC	1q32.1	46 (8.66%)	11 (0.94%)	3.21	5.51e-15	6.03e-13	(A) Metastasis
KLHDC8A	1q32.1	36 (6.78%)	4 (0.34%)	4.31	5.82e-15	6.34e-13	(A) Metastasis
EIF5AL1	10q22.3	56 (10.55%)	20 (1.70%)	2.63	7.12e-15	7.71e-13	(A) Metastasis
SAR1A	10q22.1	48 (9.04%)	13 (1.11%)	3.03	8.59e-15	9.26e-13	(A) Metastasis
CYP4F62P	2q21.1	0 (0.00%)	17 (3.44%)	<-10	1.17e-14	1.21e-12	(B) Primary
DUSP3	17q21.31	0 (0.00%)	17 (3.44%)	<-10	1.17e-14	1.21e-12	(B) Primary
LINC01014	3q26.32	0 (0.00%)	17 (3.44%)	<-10	1.17e-14	1.21e-12	(B) Primary
LINC01333	5q13.3	0 (0.00%)	17 (3.44%)	<-10	1.17e-14	1.21e-12	(B) Primary
LINC01335	5q13.3	0 (0.00%)	17 (3.44%)	<-10	1.17e-14	1.21e-12	(B) Primary
LINC02015	3q26.32	0 (0.00%)	17 (3.44%)	<-10	1.17e-14	1.21e-12	(B) Primary
MICOS10P1	13q13.1	0 (0.00%)	17 (3.44%)	<-10	1.17e-14	1.21e-12	(B) Primary
POTEI	2q21.1	0 (0.00%)	17 (3.44%)	<-10	1.17e-14	1.21e-12	(B) Primary
POTEJ	2q21.1	0 (0.00%)	17 (3.44%)	<-10	1.17e-14	1.21e-12	(B) Primary
TAT-AS1	16q22.2	0 (0.00%)	17 (3.44%)	<-10	1.17e-14	1.21e-12	(B) Primary
MRPL9	1q21.3	37 (6.97%)	31 (1.01%)	2.78	1.52e-14	1.56e-12	(A) Metastasis
UTY	Yq11.221	13 (3.41%)	0 (0.00%)	>10	1.67e-14	1.7e-12	(A) Metastasis
LEMD1	1q32.1	35 (6.59%)	4 (0.34%)	4.27	1.76e-14	1.79e-12	(A) Metastasis
KCNMA1	10q22.3	61 (11.49%)	26 (2.21%)	2.37	1.85e-14	1.87e-12	(A) Metastasis
PPIF	10q22.3	56 (10.55%)	21 (1.79%)	2.56	1.86e-14	1.87e-12	(A) Metastasis
ZCCHC24	10q22.3	56 (10.55%)	21 (1.79%)	2.56	1.86e-14	1.87e-12	(A) Metastasis
KLHL15	Xp22.11	22 (11.11%)	6 (0.51%)	4.44	1.91e-14	1.91e-12	(A) Metastasis
FGF19	11q13.3	127 (4.67%)	59 (1.51%)	1.63	2.3e-14	2.28e-12	(A) Metastasis
RBMY1F	Yq11.223	7 (14.58%)	0 (0.00%)	>10	2.37e-14	2.34e-12	(A) Metastasis
TSPY3	Yp11.2	7 (14.58%)	0 (0.00%)	>10	2.37e-14	2.34e-12	(A) Metastasis
REN	1q32.1	42 (7.91%)	9 (0.77%)	3.37	2.38e-14	2.34e-12	(A) Metastasis
PREX2	8q13.2	197 (10.14%)	137 (4.53%)	1.16	2.64e-14	2.58e-12	(A) Metastasis
CTNNB1	3p22.1	169 (6.21%)	97 (2.48%)	1.33	3.31e-14	3.22e-12	(A) Metastasis
MYPN	10q21.3	56 (10.55%)	22 (1.86%)	2.51	3.47e-14	3.36e-12	(A) Metastasis
PLAC9	10q22.3	54 (10.17%)	20 (1.70%)	2.58	4.53e-14	4.38e-12	(A) Metastasis
CNTN2	1q32.1	45 (8.47%)	12 (1.02%)	3.05	5.12e-14	4.92e-12	(A) Metastasis
CCNB3	Xp11.22	10 (5.05%)	0 (0.00%)	>10	5.18e-14	4.96e-12	(A) Metastasis
GAGE2E	Xp11.23	22 (14.67%)	1 (0.20%)	6.18	6.3e-14	6.01e-12	(A) Metastasis
NPFFR1	10q22.1	47 (8.85%)	14 (1.19%)	2.89	7.15e-14	6.79e-12	(A) Metastasis
ANKDD1B	5q13.3	0 (0.00%)	16 (3.24%)	<-10	7.84e-14	7.15e-12	(B) Primary
CCDC148-AS1	2q24.1	0 (0.00%)	16 (3.24%)	<-10	7.84e-14	7.15e-12	(B) Primary
CFAP97D1	17q21.31	0 (0.00%)	16 (3.24%)	<-10	7.84e-14	7.15e-12	(B) Primary
FAM215A	17q21.31	0 (0.00%)	16 (3.24%)	<-10	7.84e-14	7.15e-12	(B) Primary
LINC01023	5q21.3	0 (0.00%)	16 (3.24%)	<-10	7.84e-14	7.15e-12	(B) Primary
LINC02653	10q23.31	0 (0.00%)	16 (3.24%)	<-10	7.84e-14	7.15e-12	(B) Primary
NSFP1	17q21.31	0 (0.00%)	16 (3.24%)	<-10	7.84e-14	7.15e-12	(B) Primary
RNU6-19P	15q22.31	0 (0.00%)	16 (3.24%)	<-10	7.84e-14	7.15e-12	(B) Primary
XXYLT1-AS1	3q29	0 (0.00%)	16 (3.24%)	<-10	7.84e-14	7.15e-12	(B) Primary
XXYLT1-AS2	3q29	0 (0.00%)	16 (3.24%)	<-10	7.84e-14	7.15e-12	(B) Primary
MUC16	19p13.2	104 (19.59%)	82 (6.98%)	1.49	9.31e-14	8.45e-12	(A) Metastasis
MT-CO2	mitochondria	9 (6.00%)	0 (0.00%)	>10	9.71e-14	8.75e-12	(A) Metastasis
SNORD116-19	15q11.2	9 (6.00%)	0 (0.00%)	>10	9.71e-14	8.75e-12	(A) Metastasis
VPS13B	8q22.2	96 (18.08%)	71 (6.05%)	1.58	9.82e-14	8.81e-12	(A) Metastasis
ANXA11	10q22.3	55 (10.36%)	22 (1.87%)	2.47	1.16e-13	1.04e-11	(A) Metastasis
DLG5	10q22.3	55 (10.36%)	22 (1.87%)	2.47	1.16e-13	1.04e-11	(A) Metastasis
EFNB1	Xq13.1	59 (11.11%)	4 (0.81%)	3.78	1.17e-13	1.04e-11	(A) Metastasis
CT47A1	Xq24	23 (15.33%)	2 (0.40%)	5.24	1.36e-13	1.17e-11	(A) Metastasis
CT47A10	Xq24	23 (15.33%)	2 (0.40%)	5.24	1.36e-13	1.17e-11	(A) Metastasis
CT47A11	Xq24	23 (15.33%)	2 (0.40%)	5.24	1.36e-13	1.17e-11	(A) Metastasis
CT47A12	Xq24	23 (15.33%)	2 (0.40%)	5.24	1.36e-13	1.17e-11	(A) Metastasis
CT47A2	Xq24	23 (15.33%)	2 (0.40%)	5.24	1.36e-13	1.17e-11	(A) Metastasis
CT47A3	Xq24	23 (15.33%)	2 (0.40%)	5.24	1.36e-13	1.17e-11	(A) Metastasis
CT47A4	Xq24	23 (15.33%)	2 (0.40%)	5.24	1.36e-13	1.17e-11	(A) Metastasis
CT47A5	Xq24	23 (15.33%)	2 (0.40%)	5.24	1.36e-13	1.17e-11	(A) Metastasis
CT47A8	Xq24	23 (15.33%)	2 (0.40%)	5.24	1.36e-13	1.17e-11	(A) Metastasis
GLRA2	Xp22.2	18 (9.09%)	11 (0.49%)	4.21	1.81e-13	1.54e-11	(A) Metastasis
DSTYK	1q32.1	40 (7.53%)	9 (0.77%)	3.3	1.84e-13	1.57e-11	(A) Metastasis
APOO	Xp22.11	24 (12.12%)	11 (0.94%)	3.69	1.85e-13	1.57e-11	(A) Metastasis
ZFY	Yp11.2	12 (3.15%)	0 (0.00%)	>10	1.94e-13	1.64e-11	(A) Metastasis
PLEKHG4B	5p15.33	31 (6.42%)	36 (0.92%)	2.8	1.97e-13	1.65e-11	(A) Metastasis
TSPY2	Yp11.2	10 (20.83%)	2 (0.17%)	6.93	2.07e-13	1.73e-11	(A) Metastasis
ZFHX3	16q22.2-q22.3	267 (10.36%)	203 (5.42%)	0.94	2.2e-13	1.84e-11	(A) Metastasis
MYEOV	11q13.3	60 (11.30%)	28 (2.39%)	2.24	2.31e-13	1.93e-11	(A) Metastasis
TMCC2	1q32.1	41 (7.72%)	10 (0.85%)	3.18	2.41e-13	2e-11	(A) Metastasis
RPS6KA3	Xp22.12	19 (9.60%)	4 (0.34%)	4.82	2.56e-13	2.11e-11	(A) Metastasis
PRXL2A	10q23.1	53 (9.98%)	21 (1.79%)	2.48	2.85e-13	2.35e-11	(A) Metastasis
PPA1	10q22.1	45 (8.47%)	14 (1.18%)	2.84	3.78e-13	3.1e-11	(A) Metastasis
ZC4H2	Xq11.2	57 (10.73%)	4 (0.81%)	3.73	4.26e-13	3.48e-11	(A) Metastasis
TYSND1	10q22.1	44 (8.29%)	13 (1.11%)	2.9	4.29e-13	3.49e-11	(A) Metastasis
SLC26A9	1q32.1	39 (7.34%)	9 (0.77%)	3.26	5.08e-13	4.12e-11	(A) Metastasis
BAZ2B-AS1		0 (0.00%)	15 (3.04%)	<-10	5.24e-13	4.14e-11	(B) Primary
LINC00457	13q13.2	0 (0.00%)	15 (3.04%)	<-10	5.24e-13	4.14e-11	(B) Primary
LINC00502	10q23.31	0 (0.00%)	15 (3.04%)	<-10	5.24e-13	4.14e-11	(B) Primary
LINC01208	3q26.32	0 (0.00%)	15 (3.04%)	<-10	5.24e-13	4.14e-11	(B) Primary
LINC01375	10q23.31	0 (0.00%)	15 (3.04%)	<-10	5.24e-13	4.14e-11	(B) Primary
PSMD14-DT		0 (0.00%)	15 (3.04%)	<-10	5.24e-13	4.14e-11	(B) Primary
TMEM44-AS1	3q29	0 (0.00%)	15 (3.04%)	<-10	5.24e-13	4.14e-11	(B) Primary
TNKS2-DT		0 (0.00%)	15 (3.04%)	<-10	5.24e-13	4.14e-11	(B) Primary
GAGE8	Xp11	24 (12.12%)	1 (0.20%)	5.9	5.95e-13	4.68e-11	(A) Metastasis
MBL1P	10q22.3	48 (9.94%)	20 (1.70%)	2.54	6.03e-13	4.73e-11	(A) Metastasis
PDHA1	Xp22.12	20 (10.10%)	6 (0.51%)	4.3	6.73e-13	5.24e-11	(A) Metastasis
PRDX4	Xp22.11	20 (10.10%)	6 (0.51%)	4.3	6.73e-13	5.24e-11	(A) Metastasis
CDRT4	17p12	13 (2.45%)	0 (0.00%)	>10	8.48e-13	6.56e-11	(A) Metastasis
PMP22	17p12	13 (2.45%)	0 (0.00%)	>10	8.48e-13	6.56e-11	(A) Metastasis
IKBKE	1q32.1	67 (2.46%)	18 (0.46%)	2.42	8.94e-13	6.89e-11	(A) Metastasis
CDK18	1q32.1	37 (6.97%)	8 (0.68%)	3.35	1.04e-12	8.01e-11	(A) Metastasis
FGF3	11q13.3	122 (4.48%)	61 (1.56%)	1.53	1.06e-12	8.13e-11	(A) Metastasis
BCLAF3	Xp22.12	19 (9.60%)	5 (0.43%)	4.49	1.07e-12	8.19e-11	(A) Metastasis
DDX3Y	Yq11.221	11 (22.92%)	6 (0.51%)	5.49	1.09e-12	8.26e-11	(A) Metastasis
TVP23C-CDRT4	17p12	9 (4.55%)	0 (0.00%)	>10	1.13e-12	8.57e-11	(A) Metastasis
NAALADL2	3q26.31	36 (6.78%)	50 (1.27%)	2.41	1.21e-12	9.12e-11	(A) Metastasis
SFTPA2	10q22.3	50 (10.35%)	23 (1.96%)	2.4	1.22e-12	9.21e-11	(A) Metastasis
UNC5B	10q22.1	57 (10.73%)	27 (2.30%)	2.22	1.35e-12	1.02e-10	(A) Metastasis
SFTPA1	10q22.3	48 (9.94%)	21 (1.79%)	2.47	1.45e-12	1.09e-10	(A) Metastasis
AWAT1	Xq13.1	18 (9.09%)	4 (0.34%)	4.74	1.59e-12	1.18e-10	(A) Metastasis
MECP2	Xq28	18 (9.09%)	4 (0.34%)	4.74	1.59e-12	1.18e-10	(A) Metastasis
CRISPLD1	8q21.13	92 (17.33%)	71 (6.05%)	1.52	1.64e-12	1.21e-10	(A) Metastasis
GRHL2	8q22.3	89 (16.76%)	67 (5.71%)	1.55	1.75e-12	1.29e-10	(A) Metastasis
CASC6	6q15	0 (0.00%)	44 (1.36%)	<-10	1.93e-12	1.42e-10	(B) Primary
GAGE2A	Xp11.23	23 (11.62%)	1 (0.20%)	5.84	2.18e-12	1.6e-10	(A) Metastasis
UBQLN2	Xp11.21	16 (8.08%)	2 (0.17%)	5.57	2.42e-12	1.77e-10	(A) Metastasis
COL14A1	8q24.12	84 (15.82%)	61 (5.20%)	1.61	2.62e-12	1.91e-10	(A) Metastasis
CTAG1B	Xq28	8 (5.33%)	0 (0.00%)	>10	2.79e-12	1.96e-10	(A) Metastasis
F8A3	Xq28	8 (5.33%)	0 (0.00%)	>10	2.79e-12	1.96e-10	(A) Metastasis
FAM223B	Xq28	8 (5.33%)	0 (0.00%)	>10	2.79e-12	1.96e-10	(A) Metastasis
H2AB3	Xq28	8 (5.33%)	0 (0.00%)	>10	2.79e-12	1.96e-10	(A) Metastasis
MT-CO3	mitochondria	8 (5.33%)	0 (0.00%)	>10	2.79e-12	1.96e-10	(A) Metastasis
MT-ND4L	mitochondria	8 (5.33%)	0 (0.00%)	>10	2.79e-12	1.96e-10	(A) Metastasis
PNMA6B	Xq28	8 (5.33%)	0 (0.00%)	>10	2.79e-12	1.96e-10	(A) Metastasis
PRR20E	13q21.1	8 (5.33%)	0 (0.00%)	>10	2.79e-12	1.96e-10	(A) Metastasis
SNORD109B	15q11.2	8 (5.33%)	0 (0.00%)	>10	2.79e-12	1.96e-10	(A) Metastasis
SNORD116-6	15q11.2	8 (5.33%)	0 (0.00%)	>10	2.79e-12	1.96e-10	(A) Metastasis
SNORD116-7	15q11.2	8 (5.33%)	0 (0.00%)	>10	2.79e-12	1.96e-10	(A) Metastasis
TMLHE-AS1	Xq28	8 (5.33%)	0 (0.00%)	>10	2.79e-12	1.96e-10	(A) Metastasis
ETNK2	1q32.1	36 (6.78%)	8 (0.68%)	3.31	2.88e-12	2.02e-10	(A) Metastasis
MACROH2A2	10q22.1	42 (7.91%)	13 (1.11%)	2.84	2.92e-12	2.04e-10	(A) Metastasis
AIFM2	10q22.1	46 (8.66%)	17 (1.43%)	2.59	3.07e-12	2.14e-10	(A) Metastasis
RAD21	8q24.11	162 (6.29%)	101 (2.70%)	1.22	3.28e-12	2.28e-10	(A) Metastasis
NCALD	8q22.3	86 (16.20%)	65 (5.49%)	1.56	3.44e-12	2.29e-10	(A) Metastasis
ADIPOQ-AS1	3q27.3	0 (0.00%)	14 (2.83%)	<-10	3.49e-12	2.29e-10	(B) Primary
ARF2P	17q21.31	0 (0.00%)	14 (2.83%)	<-10	3.49e-12	2.29e-10	(B) Primary
ARL17B	17q21.31	0 (0.00%)	14 (2.83%)	<-10	3.49e-12	2.29e-10	(B) Primary
KANSL1-AS1	17q21.31	0 (0.00%)	14 (2.83%)	<-10	3.49e-12	2.29e-10	(B) Primary
LINC01206	3q26.33	0 (0.00%)	14 (2.83%)	<-10	3.49e-12	2.29e-10	(B) Primary
LINC01209	3q26.32	0 (0.00%)	14 (2.83%)	<-10	3.49e-12	2.29e-10	(B) Primary
LINC01806	2q24.2	0 (0.00%)	14 (2.83%)	<-10	3.49e-12	2.29e-10	(B) Primary
LINC01876	2q24.1	0 (0.00%)	14 (2.83%)	<-10	3.49e-12	2.29e-10	(B) Primary
LINC02210	17q21.31	0 (0.00%)	14 (2.83%)	<-10	3.49e-12	2.29e-10	(B) Primary
LINC02466	4q28.2	0 (0.00%)	14 (2.83%)	<-10	3.49e-12	2.29e-10	(B) Primary
LINC02516	4q28.1	0 (0.00%)	14 (2.83%)	<-10	3.49e-12	2.29e-10	(B) Primary
LINC02998		0 (0.00%)	14 (2.83%)	<-10	3.49e-12	2.29e-10	(B) Primary
LRRC37A4P	17q21.31	0 (0.00%)	14 (2.83%)	<-10	3.49e-12	2.29e-10	(B) Primary
MAP3K14-AS1	17q21.31	0 (0.00%)	14 (2.83%)	<-10	3.49e-12	2.29e-10	(B) Primary
MAPK8IP1P2	17q21.31	0 (0.00%)	14 (2.83%)	<-10	3.49e-12	2.29e-10	(B) Primary
MAPT-AS1	17q21.31	0 (0.00%)	14 (2.83%)	<-10	3.49e-12	2.29e-10	(B) Primary
MAPT-IT1	17q21.31	0 (0.00%)	14 (2.83%)	<-10	3.49e-12	2.29e-10	(B) Primary
SMG1P7	16q22.1	0 (0.00%)	14 (2.83%)	<-10	3.49e-12	2.29e-10	(B) Primary
TPRG1-AS2	3q28	0 (0.00%)	14 (2.83%)	<-10	3.49e-12	2.29e-10	(B) Primary
RRM2B	8q22.3	82 (15.44%)	59 (5.03%)	1.62	3.75e-12	2.45e-10	(A) Metastasis
EDA	Xq13.1	33 (6.21%)	6 (0.51%)	3.6	3.98e-12	2.58e-10	(A) Metastasis
FAM72A	1q32.1	33 (6.21%)	6 (0.51%)	3.6	3.98e-12	2.58e-10	(A) Metastasis
SCML2	Xp22.13	22 (11.11%)	11 (0.94%)	3.57	5.03e-12	3.25e-10	(A) Metastasis
RNF19A	8q22.2	86 (16.20%)	65 (5.54%)	1.55	5.12e-12	3.3e-10	(A) Metastasis
TMEM70	8q21.11	91 (17.14%)	72 (6.13%)	1.48	5.31e-12	3.42e-10	(A) Metastasis
CT47A6	Xq24	24 (12.12%)	2 (0.40%)	4.9	5.8e-12	3.72e-10	(A) Metastasis
ZNF706	8q22.3	85 (16.01%)	64 (5.45%)	1.55	6.17e-12	3.95e-10	(A) Metastasis
DYDC1	10q23.1	52 (9.79%)	24 (2.03%)	2.27	6.67e-12	4.26e-10	(A) Metastasis
NAP1L2	Xq13.2	12 (2.26%)	0 (0.00%)	>10	7.26e-12	4.62e-10	(A) Metastasis
LTO1	11q13.2	54 (10.17%)	26 (2.21%)	2.2	7.81e-12	4.96e-10	(A) Metastasis
NUAK2	1q32.1	35 (6.59%)	8 (0.68%)	3.27	7.93e-12	5.01e-10	(A) Metastasis
TMEM81	1q32.1	35 (6.59%)	8 (0.68%)	3.27	7.93e-12	5.01e-10	(A) Metastasis
NALF2		46 (8.66%)	2 (0.40%)	4.42	8.14e-12	5.12e-10	(A) Metastasis
FAAH2	Xp11.21	17 (8.59%)	4 (0.34%)	4.66	9.71e-12	6.1e-10	(A) Metastasis
SLC29A3	10q22.1	46 (8.66%)	18 (1.53%)	2.5	1e-11	6.27e-10	(A) Metastasis
ARID5B	10q21.2	94 (3.45%)	41 (1.05%)	1.72	1.03e-11	6.41e-10	(A) Metastasis
SPAG1	8q22.2	84 (15.82%)	64 (5.45%)	1.54	1.23e-11	7.68e-10	(A) Metastasis
CR1L	1q32.2	37 (6.97%)	10 (0.85%)	3.03	1.27e-11	7.85e-10	(A) Metastasis
UBR5	8q22.3	89 (16.76%)	71 (6.05%)	1.47	1.27e-11	7.85e-10	(A) Metastasis
IDH3G	Xq28	16 (8.08%)	3 (0.26%)	4.98	1.34e-11	8.25e-10	(A) Metastasis
SLC6A8	Xq28	16 (8.08%)	3 (0.26%)	4.98	1.34e-11	8.25e-10	(A) Metastasis
PI15	8q21.13	91 (17.14%)	74 (6.30%)	1.44	1.38e-11	8.46e-10	(A) Metastasis
JPH1	8q21.11	93 (17.51%)	77 (6.56%)	1.42	1.47e-11	9.02e-10	(A) Metastasis
RBBP5	1q32.1	38 (7.16%)	11 (0.94%)	2.93	1.5e-11	9.19e-10	(A) Metastasis
RDH10	8q21.11	88 (16.57%)	70 (5.96%)	1.47	1.54e-11	9.38e-10	(A) Metastasis
RHEX	1q32.1	33 (6.21%)	7 (0.60%)	3.38	1.61e-11	9.82e-10	(A) Metastasis
ATOH7	10q21.3	46 (8.66%)	19 (1.60%)	2.43	1.9e-11	1.15e-09	(A) Metastasis
DNA2	10q21.3	46 (8.66%)	19 (1.60%)	2.43	1.9e-11	1.15e-09	(A) Metastasis
EGFL6	Xp22.2	18 (9.09%)	6 (0.51%)	4.17	1.94e-11	1.17e-09	(A) Metastasis
DYDC2	10q23.1	51 (9.60%)	24 (2.04%)	2.23	2.05e-11	1.23e-09	(A) Metastasis
AWAT2	Xq13.1	30 (5.65%)	5 (0.43%)	3.73	2.08e-11	1.25e-09	(A) Metastasis
ADAMTS14	10q22.1	50 (9.42%)	23 (1.96%)	2.26	2.16e-11	1.29e-09	(A) Metastasis
CUL9	6p21.1	34 (6.40%)	8 (0.68%)	3.23	2.17e-11	1.29e-09	(A) Metastasis
LINC00333	13q31.1	0 (0.00%)	13 (2.63%)	<-10	2.33e-11	1.35e-09	(B) Primary
LINC00397	13q31.2	0 (0.00%)	13 (2.63%)	<-10	2.33e-11	1.35e-09	(B) Primary
LINC00559	13q31.3	0 (0.00%)	13 (2.63%)	<-10	2.33e-11	1.35e-09	(B) Primary
LINC02180	16q12.1	0 (0.00%)	13 (2.63%)	<-10	2.33e-11	1.35e-09	(B) Primary
LINC02478	2q24.2	0 (0.00%)	13 (2.63%)	<-10	2.33e-11	1.35e-09	(B) Primary
LPP-AS1	3q28	0 (0.00%)	13 (2.63%)	<-10	2.33e-11	1.35e-09	(B) Primary
OPA1-AS1	3q29	0 (0.00%)	13 (2.63%)	<-10	2.33e-11	1.35e-09	(B) Primary
PEX5L-AS2	3q26.33	0 (0.00%)	13 (2.63%)	<-10	2.33e-11	1.35e-09	(B) Primary
SCAMP1-AS1	5q14.1	0 (0.00%)	13 (2.63%)	<-10	2.33e-11	1.35e-09	(B) Primary
ZBED3-AS1	5q13.3	0 (0.00%)	13 (2.63%)	<-10	2.33e-11	1.35e-09	(B) Primary
SPOCK2	10q22.1	47 (8.85%)	20 (1.70%)	2.38	2.41e-11	1.4e-09	(A) Metastasis
PAGE4	Xp11.23	8 (4.04%)	0 (0.00%)	>10	2.45e-11	1.41e-09	(A) Metastasis
USP27X	Xp11.23	8 (4.04%)	0 (0.00%)	>10	2.45e-11	1.41e-09	(A) Metastasis
TSPY1	Yp11.2	10 (2.62%)	0 (0.00%)	>10	2.61e-11	1.51e-09	(A) Metastasis
KDM5C	Xp11.22	69 (2.54%)	23 (0.59%)	2.11	2.69e-11	1.54e-09	(A) Metastasis
SNX31	8q22.3	85 (16.01%)	67 (5.71%)	1.49	2.74e-11	1.57e-09	(A) Metastasis
NAV1	1q32.1	36 (6.78%)	10 (0.85%)	2.99	3.35e-11	1.92e-09	(A) Metastasis
EYA1	8q13.3	81 (15.25%)	62 (5.28%)	1.53	3.55e-11	2.03e-09	(A) Metastasis
LRP5	11q13.2	52 (9.79%)	26 (2.21%)	2.14	4.13e-11	2.35e-09	(A) Metastasis
GDAP1	8q21.11	90 (16.95%)	75 (6.39%)	1.41	4.22e-11	2.39e-09	(A) Metastasis
CCAR1	10q21.3	47 (8.85%)	21 (1.77%)	2.32	4.32e-11	2.44e-09	(A) Metastasis
COL13A1	10q22.1	41 (7.72%)	15 (1.27%)	2.61	4.45e-11	2.51e-09	(A) Metastasis
KISS1	1q32.1	38 (7.16%)	12 (1.02%)	2.81	4.46e-11	2.51e-09	(A) Metastasis
PBLD	10q21.3	45 (8.47%)	19 (1.60%)	2.4	4.59e-11	2.58e-09	(A) Metastasis
RUFY2	10q21.3	43 (8.10%)	17 (1.43%)	2.5	4.66e-11	2.61e-09	(A) Metastasis
TRAM1	8q13.3	82 (15.44%)	64 (5.45%)	1.5	4.83e-11	2.7e-09	(A) Metastasis
REXO1L1P	8q21.2	66 (12.43%)	19 (2.79%)	2.15	5.01e-11	2.79e-09	(A) Metastasis
PSAP	10q22.1	49 (9.23%)	23 (1.96%)	2.24	5.05e-11	2.81e-09	(A) Metastasis
LY96	8q21.11	89 (16.76%)	74 (6.30%)	1.41	5.14e-11	2.85e-09	(A) Metastasis
LINC00303	1q32.1	30 (6.21%)	7 (0.60%)	3.38	5.15e-11	2.85e-09	(A) Metastasis
DNAJB12	10q22.1	48 (9.04%)	22 (1.87%)	2.27	5.32e-11	2.94e-09	(A) Metastasis
ANXA7	10q22.2	46 (8.66%)	20 (1.70%)	2.35	5.73e-11	3.16e-09	(A) Metastasis
NLGN4Y	Yq11.221	11 (22.92%)	2 (0.40%)	5.82	5.76e-11	3.17e-09	(A) Metastasis
CBLL2	Xp22.11	16 (8.08%)	4 (0.34%)	4.57	5.85e-11	3.2e-09	(A) Metastasis
PNCK	Xq28	16 (8.08%)	4 (0.34%)	4.57	5.85e-11	3.2e-09	(A) Metastasis
TBATA	10q22.1	45 (8.47%)	19 (1.62%)	2.39	5.86e-11	3.2e-09	(A) Metastasis
KDM5B	1q32.1	33 (6.21%)	8 (0.68%)	3.19	5.88e-11	3.2e-09	(A) Metastasis
AMELY	Yp11.2	11 (2.07%)	0 (0.00%)	>10	6.21e-11	3.38e-09	(A) Metastasis
PSKH2	8q21.3	75 (14.12%)	55 (4.68%)	1.59	6.33e-11	3.43e-09	(A) Metastasis
VGLL3	3p12.1	26 (4.90%)	29 (0.74%)	2.73	6.97e-11	3.77e-09	(A) Metastasis
MAT1A	10q22.3	54 (10.17%)	29 (2.47%)	2.04	7.12e-11	3.84e-09	(A) Metastasis
CXORF49B	Xq13.1	7 (4.67%)	0 (0.00%)	>10	7.93e-11	4.23e-09	(A) Metastasis
MT-ND6	mitochondria	7 (4.67%)	0 (0.00%)	>10	7.93e-11	4.23e-09	(A) Metastasis
SNORA11E	Xp11.22	7 (4.67%)	0 (0.00%)	>10	7.93e-11	4.23e-09	(A) Metastasis
SNORD116-9	15q11.2	7 (4.67%)	0 (0.00%)	>10	7.93e-11	4.23e-09	(A) Metastasis
THSD1P1	13q14.3	7 (4.67%)	0 (0.00%)	>10	7.93e-11	4.23e-09	(A) Metastasis
FOXR2	Xp11.21	15 (7.58%)	3 (0.26%)	4.89	8.36e-11	4.45e-09	(A) Metastasis
ESRP1	8q22.1	84 (15.82%)	68 (5.79%)	1.45	8.58e-11	4.56e-09	(A) Metastasis
TTC7A	2p21	24 (4.97%)	12 (0.54%)	3.21	8.87e-11	4.69e-09	(A) Metastasis
RBM10	Xp11.3	57 (2.09%)	16 (0.41%)	2.36	9.3e-11	4.91e-09	(A) Metastasis
ADO	10q21.3	51 (9.60%)	26 (2.21%)	2.12	9.38e-11	4.94e-09	(A) Metastasis
ANKRD46	8q22.3	81 (15.25%)	64 (5.45%)	1.48	9.46e-11	4.97e-09	(A) Metastasis
CHST3	10q22.1	50 (9.42%)	25 (2.13%)	2.14	1.02e-10	5.32e-09	(A) Metastasis
AVPR1B	1q32.1	36 (6.78%)	11 (0.94%)	2.86	1.02e-10	5.32e-09	(A) Metastasis
GOLT1A	1q32.1	36 (6.78%)	11 (0.94%)	2.86	1.02e-10	5.32e-09	(A) Metastasis
SCFD2	4q12	27 (5.08%)	4 (0.34%)	3.9	1.05e-10	5.49e-09	(A) Metastasis
SLC25A16	10q21.3	42 (7.91%)	17 (1.43%)	2.46	1.14e-10	5.91e-09	(A) Metastasis
POLR2K	8q22.2	80 (15.07%)	63 (5.37%)	1.49	1.14e-10	5.92e-09	(A) Metastasis
JAK1	1p31.3	134 (4.92%)	81 (2.07%)	1.25	1.2e-10	6.2e-09	(A) Metastasis
SRGAP2	1q32.1	31 (5.84%)	7 (0.60%)	3.29	1.22e-10	6.32e-09	(A) Metastasis
LGR6	1q32.1	38 (7.16%)	13 (1.11%)	2.69	1.24e-10	6.4e-09	(A) Metastasis
PCYT1B	Xp22.11	17 (8.59%)	6 (0.51%)	4.07	1.25e-10	6.43e-09	(A) Metastasis
PLEKHA6	1q32.1	45 (8.47%)	20 (1.70%)	2.31	1.35e-10	6.95e-09	(A) Metastasis
FAM241B	10q22.1	40 (7.53%)	15 (1.28%)	2.56	1.38e-10	7.07e-09	(A) Metastasis
GRPR	Xp22.2	21 (10.61%)	13 (1.11%)	3.26	1.4e-10	7.15e-09	(A) Metastasis
GTF2IRD2	7q11.23	41 (7.72%)	16 (1.36%)	2.5	1.42e-10	7.19e-09	(A) Metastasis
DYNC2I1	7q36.3	43 (8.10%)	18 (1.53%)	2.4	1.42e-10	7.19e-09	(A) Metastasis
EIF4EBP2	10q22.1	43 (8.10%)	18 (1.53%)	2.4	1.42e-10	7.19e-09	(A) Metastasis
LRRC20	10q22.1	43 (8.10%)	18 (1.53%)	2.4	1.42e-10	7.19e-09	(A) Metastasis
ABCC5-AS1	3q27.1	0 (0.00%)	12 (2.43%)	<-10	1.55e-10	7.52e-09	(B) Primary
AHCTF1P1	2q24.2	0 (0.00%)	12 (2.43%)	<-10	1.55e-10	7.52e-09	(B) Primary
IL21-AS1	4q27	0 (0.00%)	12 (2.43%)	<-10	1.55e-10	7.52e-09	(B) Primary
KCNH7-AS1	2q24.2	0 (0.00%)	12 (2.43%)	<-10	1.55e-10	7.52e-09	(B) Primary
LINC00353	13q31.3	0 (0.00%)	12 (2.43%)	<-10	1.55e-10	7.52e-09	(B) Primary
LINC00433	13q31.2	0 (0.00%)	12 (2.43%)	<-10	1.55e-10	7.52e-09	(B) Primary
LINC01365	4q26	0 (0.00%)	12 (2.43%)	<-10	1.55e-10	7.52e-09	(B) Primary
LINC02069	3q27.1	0 (0.00%)	12 (2.43%)	<-10	1.55e-10	7.52e-09	(B) Primary
LINC02082	3q26.2	0 (0.00%)	12 (2.43%)	<-10	1.55e-10	7.52e-09	(B) Primary
LINC02106	5q11.1	0 (0.00%)	12 (2.43%)	<-10	1.55e-10	7.52e-09	(B) Primary
LINC02133	16q12.1	0 (0.00%)	12 (2.43%)	<-10	1.55e-10	7.52e-09	(B) Primary
LINC02192	16q12.1	0 (0.00%)	12 (2.43%)	<-10	1.55e-10	7.52e-09	(B) Primary
LINC02359	12q24.32	0 (0.00%)	12 (2.43%)	<-10	1.55e-10	7.52e-09	(B) Primary
LINC02881	10q11.21	0 (0.00%)	12 (2.43%)	<-10	1.55e-10	7.52e-09	(B) Primary
LIPE-AS1	19q13.2	0 (0.00%)	12 (2.43%)	<-10	1.55e-10	7.52e-09	(B) Primary
NAALADL2-AS3	3q26.3	0 (0.00%)	12 (2.43%)	<-10	1.55e-10	7.52e-09	(B) Primary
THBS4-AS1	5q14.1	0 (0.00%)	12 (2.43%)	<-10	1.55e-10	7.52e-09	(B) Primary
TRDN-AS1	6q22.31	0 (0.00%)	12 (2.43%)	<-10	1.55e-10	7.52e-09	(B) Primary
STAU2	8q21.11	90 (16.95%)	78 (6.64%)	1.35	1.6e-10	7.75e-09	(A) Metastasis
SOX17	8q11.23	116 (4.26%)	65 (1.66%)	1.36	1.8e-10	8.73e-09	(A) Metastasis
ODF1	8q22.3	78 (14.69%)	62 (5.23%)	1.49	1.89e-10	9.15e-09	(A) Metastasis
FGF12	3q28-q29	29 (5.46%)	40 (1.02%)	2.42	1.91e-10	9.23e-09	(A) Metastasis
POLR3A	10q22.3	57 (10.73%)	34 (2.90%)	1.89	1.92e-10	9.23e-09	(A) Metastasis
NCAM1	11q23.2	28 (5.27%)	37 (0.94%)	2.48	1.97e-10	9.49e-09	(A) Metastasis
ATP6V1C1	8q22.3	77 (14.50%)	60 (5.11%)	1.5	2e-10	9.58e-09	(A) Metastasis
YWHAZ	8q22.3	82 (15.44%)	67 (5.71%)	1.44	2.01e-10	9.61e-09	(A) Metastasis
HNRNPH3	10q21.3	47 (8.85%)	23 (1.94%)	2.19	2.1e-10	1e-08	(A) Metastasis
COX6C	8q22.2	74 (13.94%)	56 (4.77%)	1.55	2.1e-10	1e-08	(A) Metastasis
C4BPB	1q32.1	29 (5.46%)	6 (0.51%)	3.42	2.47e-10	1.17e-08	(A) Metastasis
PPP1R12B	1q32.1	29 (5.46%)	6 (0.51%)	3.42	2.47e-10	1.17e-08	(A) Metastasis
C10ORF105	10q22.1	48 (9.04%)	24 (2.04%)	2.14	2.5e-10	1.18e-08	(A) Metastasis
CHST12	7p22.3	26 (4.90%)	23 (0.74%)	2.72	2.5e-10	1.18e-08	(A) Metastasis
CCND1	11q13.3	130 (4.78%)	79 (2.02%)	1.24	2.78e-10	1.31e-08	(A) Metastasis
SGPL1	10q22.1	46 (8.66%)	22 (1.87%)	2.21	2.86e-10	1.35e-08	(A) Metastasis
PABPC1	8q22.3	80 (15.07%)	65 (5.54%)	1.44	2.94e-10	1.38e-08	(A) Metastasis
PRF1	10q22.1	45 (8.47%)	21 (1.79%)	2.24	3.03e-10	1.42e-08	(A) Metastasis
SYT2	1q32.1	26 (4.90%)	4 (0.34%)	3.85	3.05e-10	1.43e-08	(A) Metastasis
BRCA2	13q13.1	228 (8.38%)	181 (4.61%)	0.86	3.14e-10	1.47e-08	(A) Metastasis
LRRCC1	8q21.2	82 (15.44%)	68 (5.79%)	1.41	3.17e-10	1.48e-08	(A) Metastasis
ATP2B4	1q32.1	44 (8.29%)	20 (1.70%)	2.28	3.18e-10	1.48e-08	(A) Metastasis
NODAL	10q22.1	43 (8.10%)	19 (1.62%)	2.32	3.3e-10	1.53e-08	(A) Metastasis
OIT3	10q22.1	43 (8.10%)	19 (1.62%)	2.32	3.3e-10	1.53e-08	(A) Metastasis
MAML3	4q31.1	40 (7.53%)	16 (1.36%)	2.47	3.44e-10	1.59e-08	(A) Metastasis
RRAGB	Xp11.21	15 (7.58%)	4 (0.34%)	4.47	3.47e-10	1.6e-08	(A) Metastasis
GEM	8q22.1	79 (14.88%)	64 (5.45%)	1.45	3.56e-10	1.64e-08	(A) Metastasis
SBSPON	8q21.11	83 (15.63%)	70 (5.96%)	1.39	4.1e-10	1.88e-08	(A) Metastasis
C5ORF64	5q12.1	21 (0.77%)	44 (3.71%)	-2.27	4.32e-10	1.98e-08	(B) Primary
TSPYL5	8q22.1	75 (14.12%)	59 (5.03%)	1.49	4.69e-10	2.15e-08	(A) Metastasis
SNRPE	1q32.1	35 (3.07%)	9 (0.40%)	2.93	4.7e-10	2.15e-08	(A) Metastasis
TSPAN14	10q23.1	49 (9.23%)	26 (2.21%)	2.06	4.73e-10	2.16e-08	(A) Metastasis
LINC00260	1q32.1	29 (6.00%)	8 (0.68%)	3.14	5.05e-10	2.29e-08	(A) Metastasis
SNORA77	1q32.1	29 (6.00%)	8 (0.68%)	3.14	5.05e-10	2.29e-08	(A) Metastasis
RASSF5	1q32.1	32 (6.03%)	9 (0.77%)	2.97	5.13e-10	2.32e-08	(A) Metastasis
RGS22	8q22.2	77 (14.50%)	62 (5.28%)	1.46	5.19e-10	2.35e-08	(A) Metastasis
NUDT12	5q21.2	41 (7.72%)	65 (2.09%)	1.88	5.27e-10	2.38e-08	(A) Metastasis
DGKK	Xp11.22	7 (3.54%)	0 (0.00%)	>10	5.28e-10	2.38e-08	(A) Metastasis
DCX	Xq23	10 (1.88%)	0 (0.00%)	>10	5.31e-10	2.39e-08	(A) Metastasis
ZXDA	Xp11.21	36 (6.78%)	1 (0.20%)	5.07	5.48e-10	2.46e-08	(A) Metastasis
FBXO43	8q22.2	79 (14.88%)	65 (5.54%)	1.43	5.65e-10	2.53e-08	(A) Metastasis
PLCG2	16q24.1	117 (4.54%)	69 (1.85%)	1.3	5.95e-10	2.66e-08	(A) Metastasis
VSIR	10q22.1	53 (9.98%)	31 (2.64%)	1.92	6.02e-10	2.68e-08	(A) Metastasis
AZIN1	8q22.3	76 (14.31%)	61 (5.20%)	1.46	6.26e-10	2.79e-08	(A) Metastasis
KLF10	8q22.3	79 (14.88%)	66 (5.57%)	1.42	6.28e-10	2.79e-08	(A) Metastasis
MYORG	9p13.3	32 (6.63%)	11 (0.94%)	2.82	6.35e-10	2.82e-08	(A) Metastasis
ZFAND1	8q21.13	83 (15.63%)	71 (6.05%)	1.37	6.37e-10	2.82e-08	(A) Metastasis
GRM8	7q31.33	23 (4.33%)	25 (0.64%)	2.76	6.42e-10	2.84e-08	(A) Metastasis
RPL7	8q21.11	85 (16.01%)	74 (6.30%)	1.34	6.63e-10	2.92e-08	(A) Metastasis
RIBC1	Xp11.22	13 (6.57%)	2 (0.17%)	5.27	6.68e-10	2.94e-08	(A) Metastasis
SOX13	1q32.1	34 (6.40%)	11 (0.94%)	2.77	6.68e-10	2.94e-08	(A) Metastasis
MAPKAPK2	1q32.1	28 (5.27%)	6 (0.51%)	3.37	6.82e-10	2.99e-08	(A) Metastasis
JCAD	10p11.23	35 (6.59%)	12 (1.02%)	2.69	7.29e-10	3.18e-08	(A) Metastasis
LAX1	1q32.1	35 (6.59%)	12 (1.02%)	2.69	7.29e-10	3.18e-08	(A) Metastasis
TET1	10q21.3	118 (4.34%)	70 (1.78%)	1.28	7.53e-10	3.28e-08	(A) Metastasis
CCNE1	19q12	44 (1.65%)	10 (0.26%)	2.69	7.55e-10	3.29e-08	(A) Metastasis
MSS51	10q22.2	42 (7.91%)	19 (1.62%)	2.29	7.73e-10	3.35e-08	(A) Metastasis
PALD1	10q22.1	42 (7.91%)	19 (1.62%)	2.29	7.73e-10	3.35e-08	(A) Metastasis
PCBD1	10q22.1	42 (7.91%)	19 (1.62%)	2.29	7.73e-10	3.35e-08	(A) Metastasis
SLC10A5	8q21.13	82 (15.44%)	70 (5.96%)	1.37	7.75e-10	3.35e-08	(A) Metastasis
RASL11B	4q12	25 (5.18%)	5 (0.43%)	3.6	7.78e-10	3.35e-08	(A) Metastasis
RICTOR	5p13.1	58 (2.13%)	19 (0.48%)	2.14	7.93e-10	3.41e-08	(A) Metastasis
MCU	10q22.1	39 (7.34%)	16 (1.36%)	2.43	8.28e-10	3.55e-08	(A) Metastasis
GAGE1	Xp11.23	20 (10.10%)	2 (0.40%)	4.64	8.54e-10	3.66e-08	(A) Metastasis
FABP9	8q21.13	81 (15.25%)	69 (5.88%)	1.38	9.41e-10	4.03e-08	(A) Metastasis
ITGB8-AS1	7p21.1	0 (0.00%)	11 (2.23%)	<-10	1.03e-09	4.32e-08	(B) Primary
LINC00351	13q31.1	0 (0.00%)	11 (2.23%)	<-10	1.03e-09	4.32e-08	(B) Primary
LINC01340	5q15	0 (0.00%)	11 (2.23%)	<-10	1.03e-09	4.32e-08	(B) Primary
MACC1-AS1	7p21.1	0 (0.00%)	11 (2.23%)	<-10	1.03e-09	4.32e-08	(B) Primary
NREP-AS1	5q22.1	0 (0.00%)	11 (2.23%)	<-10	1.03e-09	4.32e-08	(B) Primary
PRRT3-AS1	3p25.3	0 (0.00%)	11 (2.23%)	<-10	1.03e-09	4.32e-08	(B) Primary
RNU6-76P	13q11	0 (0.00%)	11 (2.23%)	<-10	1.03e-09	4.32e-08	(B) Primary
TM4SF1-AS1	3q25.1	0 (0.00%)	11 (2.23%)	<-10	1.03e-09	4.32e-08	(B) Primary
PIK3CB	3q22.3	110 (4.04%)	63 (1.61%)	1.33	1.07e-09	4.5e-08	(A) Metastasis
SRGN	10q22.1	44 (8.29%)	22 (1.86%)	2.16	1.19e-09	4.99e-08	(A) Metastasis
BAALC	8q22.3	75 (14.12%)	61 (5.20%)	1.44	1.2e-09	5.05e-08	(A) Metastasis
BGN	Xq28	15 (7.58%)	5 (0.43%)	4.15	1.21e-09	5.07e-08	(A) Metastasis
VCX	Xp22.31	15 (7.58%)	5 (0.43%)	4.15	1.21e-09	5.07e-08	(A) Metastasis
ASB9	Xp22.2	18 (9.09%)	10 (0.85%)	3.42	1.27e-09	5.29e-08	(A) Metastasis
KIFBP	10q22.1	43 (8.10%)	21 (1.77%)	2.19	1.28e-09	5.33e-08	(A) Metastasis
NIPAL2	8q22.2	72 (13.56%)	57 (4.86%)	1.48	1.31e-09	5.46e-08	(A) Metastasis
MYOG	1q32.1	31 (5.84%)	9 (0.77%)	2.93	1.34e-09	5.54e-08	(A) Metastasis
PRELP	1q32.1	31 (5.84%)	9 (0.77%)	2.93	1.34e-09	5.54e-08	(A) Metastasis
TSPAN15	10q22.1	42 (7.91%)	20 (1.69%)	2.23	1.37e-09	5.65e-08	(A) Metastasis
PTPRN2-AS1	7q36.3	36 (7.45%)	16 (1.36%)	2.45	1.42e-09	5.83e-08	(A) Metastasis
ZBED6	1q32.1	28 (5.80%)	8 (0.68%)	3.09	1.42e-09	5.83e-08	(A) Metastasis
CA3	8q21.2	74 (13.94%)	60 (5.11%)	1.45	1.45e-09	5.94e-08	(A) Metastasis
CDH17	8q22.1	81 (15.25%)	70 (5.96%)	1.36	1.45e-09	5.94e-08	(A) Metastasis
FABP12	8q21.13	81 (15.25%)	70 (5.96%)	1.36	1.45e-09	5.94e-08	(A) Metastasis
NCOA2	8q13.3	81 (15.25%)	70 (5.96%)	1.36	1.45e-09	5.94e-08	(A) Metastasis
GNAS	20q13.32	57 (2.09%)	19 (0.48%)	2.11	1.48e-09	6.03e-08	(A) Metastasis
TMSB4X	Xp22.2	21 (10.61%)	3 (0.61%)	4.13	1.48e-09	6.05e-08	(A) Metastasis
GHR	5p13.1-p12	23 (4.33%)	3 (0.26%)	4.08	1.49e-09	6.05e-08	(A) Metastasis
ASCC1	10q22.1	44 (8.29%)	22 (1.87%)	2.14	1.49e-09	6.05e-08	(A) Metastasis
NEUROG3	10q22.1	44 (8.29%)	22 (1.87%)	2.14	1.49e-09	6.05e-08	(A) Metastasis
ZC3H11A	1q32.1	32 (6.03%)	10 (0.85%)	2.82	1.53e-09	6.19e-08	(A) Metastasis
ZRSR2	Xp22.2	62 (2.41%)	23 (0.62%)	1.97	1.55e-09	6.24e-08	(A) Metastasis
OSR2	8q22.2	71 (13.37%)	56 (4.77%)	1.49	1.58e-09	6.37e-08	(A) Metastasis
HKDC1	10q22.1	50 (9.42%)	29 (2.47%)	1.93	1.65e-09	6.65e-08	(A) Metastasis
CHIT1	1q32.1	33 (6.21%)	11 (0.94%)	2.73	1.69e-09	6.79e-08	(A) Metastasis
CR2	1q32.2	33 (6.21%)	11 (0.94%)	2.73	1.69e-09	6.79e-08	(A) Metastasis
TERF1	8q21.11	80 (15.07%)	69 (5.88%)	1.36	1.77e-09	7.07e-08	(A) Metastasis
LPA	6q25.3-q26	11 (0.72%)	73 (3.65%)	-2.34	1.78e-09	7.12e-08	(B) Primary
FAM20C	7p22.3	34 (6.40%)	12 (1.02%)	2.65	1.82e-09	7.26e-08	(A) Metastasis
LACTB2	8q13.3	75 (14.12%)	62 (5.28%)	1.42	1.9e-09	7.56e-08	(A) Metastasis
MTDH	8q22.1	75 (14.12%)	62 (5.28%)	1.42	1.9e-09	7.56e-08	(A) Metastasis
CACNA1S	1q32.1	39 (7.34%)	17 (1.45%)	2.34	1.94e-09	7.69e-08	(A) Metastasis
MSL3	Xp22.2	16 (8.08%)	7 (0.60%)	3.76	1.97e-09	7.82e-08	(A) Metastasis
LRRN2	1q32.1	37 (6.97%)	15 (1.28%)	2.45	1.99e-09	7.86e-08	(A) Metastasis
CETN2	Xq28	14 (7.07%)	4 (0.34%)	4.38	2.02e-09	7.98e-08	(A) Metastasis
PTDSS1	8q22.1	72 (13.56%)	58 (4.94%)	1.46	2.11e-09	8.3e-08	(A) Metastasis
CENPVL2	Xp11.22	6 (4.00%)	0 (0.00%)	>10	2.24e-09	8.74e-08	(A) Metastasis
DEFB130B	8p23.1	6 (4.00%)	0 (0.00%)	>10	2.24e-09	8.74e-08	(A) Metastasis
DMRTC1	Xq13.1	6 (4.00%)	0 (0.00%)	>10	2.24e-09	8.74e-08	(A) Metastasis
JPX	Xq13.2	6 (4.00%)	0 (0.00%)	>10	2.24e-09	8.74e-08	(A) Metastasis
NAP1L6P	Xq13.2	6 (4.00%)	0 (0.00%)	>10	2.24e-09	8.74e-08	(A) Metastasis
PABPC1L2A	Xq13.2	6 (4.00%)	0 (0.00%)	>10	2.24e-09	8.74e-08	(A) Metastasis
VPS26A	10q22.1	45 (8.47%)	24 (2.03%)	2.06	2.24e-09	8.74e-08	(A) Metastasis
LAPTM4B	8q22.1	74 (13.94%)	61 (5.20%)	1.42	2.3e-09	8.91e-08	(A) Metastasis
PIP4P2	8q21.3	74 (13.94%)	61 (5.20%)	1.42	2.3e-09	8.91e-08	(A) Metastasis
FADD	11q13.3	47 (8.85%)	26 (2.21%)	2	2.31e-09	8.95e-08	(A) Metastasis
SH2D4B	10q23.1	47 (8.85%)	26 (2.21%)	2	2.31e-09	8.95e-08	(A) Metastasis
ANK3	10q21.2	63 (11.86%)	46 (3.92%)	1.6	2.4e-09	9.27e-08	(A) Metastasis
IL20	1q32.1	28 (5.27%)	7 (0.60%)	3.14	2.42e-09	9.33e-08	(A) Metastasis
OSMR	5p13.1	28 (5.27%)	7 (0.60%)	3.14	2.42e-09	9.33e-08	(A) Metastasis
MSC	8q13.3	76 (14.31%)	64 (5.45%)	1.39	2.46e-09	9.45e-08	(A) Metastasis
RIMS2	8q22.3	76 (14.31%)	64 (5.45%)	1.39	2.46e-09	9.45e-08	(A) Metastasis
HERC4	10q21.3	44 (8.29%)	23 (1.94%)	2.09	2.47e-09	9.45e-08	(A) Metastasis
SYNE1	6q25.2	74 (15.32%)	70 (5.91%)	1.37	2.49e-09	9.54e-08	(A) Metastasis
GATA1	Xp11.23	43 (1.80%)	9 (0.28%)	2.7	2.54e-09	9.68e-08	(A) Metastasis
PKIA	8q21.13	80 (15.07%)	70 (5.96%)	1.34	2.71e-09	1.03e-07	(A) Metastasis
PMP2	8q21.13	80 (15.07%)	70 (5.96%)	1.34	2.71e-09	1.03e-07	(A) Metastasis
PDE4D	5q11.2-q12.1	34 (1.60%)	63 (5.32%)	-1.74	2.87e-09	1.09e-07	(B) Primary
SETDB1	1q21.3	51 (9.59%)	31 (2.64%)	1.86	2.91e-09	1.1e-07	(A) Metastasis
DDX21	10q22.1	42 (7.91%)	21 (1.77%)	2.16	2.92e-09	1.11e-07	(A) Metastasis
OPTC	1q32.1	29 (5.46%)	8 (0.68%)	3	2.97e-09	1.12e-07	(A) Metastasis
TMEM183A	1q32.1	29 (5.46%)	8 (0.68%)	3	2.97e-09	1.12e-07	(A) Metastasis
UBE2T	1q32.1	29 (5.46%)	8 (0.68%)	3	2.97e-09	1.12e-07	(A) Metastasis
YOD1	1q32.1	29 (5.46%)	8 (0.68%)	3	2.97e-09	1.12e-07	(A) Metastasis
SLC26A7	8q21.3	75 (14.12%)	63 (5.37%)	1.4	2.98e-09	1.12e-07	(A) Metastasis
ANAPC16	10q22.1	44 (8.29%)	23 (1.96%)	2.08	3.09e-09	1.16e-07	(A) Metastasis
OPN1MW2	Xq28	13 (6.57%)	3 (0.26%)	4.68	3.11e-09	1.16e-07	(A) Metastasis
SSX7	Xp11.22	13 (6.57%)	3 (0.26%)	4.68	3.11e-09	1.16e-07	(A) Metastasis
CPT1A	11q13.3	50 (9.42%)	30 (2.56%)	1.88	3.14e-09	1.17e-07	(A) Metastasis
DPY19L4	8q22.1	77 (14.50%)	66 (5.62%)	1.37	3.15e-09	1.17e-07	(A) Metastasis
SNORD98	10q21.3	36 (7.45%)	17 (1.45%)	2.36	3.22e-09	1.2e-07	(A) Metastasis
MCL1	1q21.2	100 (3.68%)	56 (1.43%)	1.36	3.27e-09	1.21e-07	(A) Metastasis
ZC2HC1A	8q21.13	79 (14.88%)	69 (5.88%)	1.34	3.29e-09	1.22e-07	(A) Metastasis
C7	5p13.1	21 (4.35%)	3 (0.26%)	4.09	3.3e-09	1.22e-07	(A) Metastasis
FABP4	8q21.13	81 (15.25%)	72 (6.13%)	1.31	3.39e-09	1.25e-07	(A) Metastasis
PKHD1L1	8q23.1-q23.2	89 (16.76%)	84 (7.16%)	1.23	3.43e-09	1.26e-07	(A) Metastasis
KLHL12	1q32.1	30 (5.65%)	9 (0.77%)	2.88	3.47e-09	1.27e-07	(A) Metastasis
ZBTB10	8q21.13	87 (16.38%)	81 (6.90%)	1.25	3.47e-09	1.27e-07	(A) Metastasis
MATN2	8q22.1-q22.2	74 (13.94%)	62 (5.28%)	1.4	3.6e-09	1.32e-07	(A) Metastasis
ZFHX4	8q21.13	96 (18.08%)	96 (8.10%)	1.16	3.63e-09	1.33e-07	(A) Metastasis
ADAMTSL4	1q21.2	53 (9.98%)	34 (2.90%)	1.79	3.85e-09	1.41e-07	(A) Metastasis
ANO1	11q13.3	53 (9.98%)	34 (2.90%)	1.79	3.85e-09	1.41e-07	(A) Metastasis
TRPC1	3q23	41 (7.72%)	20 (1.70%)	2.18	3.9e-09	1.42e-07	(A) Metastasis
C4BPA	1q32.2	31 (5.84%)	10 (0.85%)	2.78	3.9e-09	1.42e-07	(A) Metastasis
NACA4P	8q22.3	70 (14.49%)	64 (5.45%)	1.41	3.93e-09	1.43e-07	(A) Metastasis
ATF7IP	12p13.1	9 (0.38%)	32 (2.70%)	-2.84	4e-09	1.45e-07	(B) Primary
C8ORF34	8q13.2	71 (13.37%)	58 (4.94%)	1.44	4.03e-09	1.45e-07	(A) Metastasis
ERICH5	8q22.2	71 (13.37%)	58 (4.94%)	1.44	4.03e-09	1.45e-07	(A) Metastasis
KCNS2	8q22.2	71 (13.37%)	58 (4.94%)	1.44	4.03e-09	1.45e-07	(A) Metastasis
POP1	8q22.2	71 (13.37%)	58 (4.94%)	1.44	4.03e-09	1.45e-07	(A) Metastasis
MICU1	10q22.1	40 (7.53%)	19 (1.62%)	2.22	4.14e-09	1.49e-07	(A) Metastasis
INS-IGF2	11p15.5	16 (1.21%)	61 (5.20%)	-2.1	4.17e-09	1.5e-07	(B) Primary
IMPA1	8q21.13	82 (15.44%)	74 (6.30%)	1.29	4.2e-09	1.51e-07	(A) Metastasis
CCDC160	Xq26.2	12 (6.06%)	2 (0.17%)	5.15	4.24e-09	1.52e-07	(A) Metastasis
TNIK	3q26.2-q26.31	61 (11.49%)	45 (3.80%)	1.6	4.27e-09	1.53e-07	(A) Metastasis
TRPA1	8q21.11	82 (15.44%)	75 (6.33%)	1.29	4.47e-09	1.6e-07	(A) Metastasis
EGR2	10q21.3	47 (8.85%)	27 (2.30%)	1.94	4.51e-09	1.61e-07	(A) Metastasis
SPIN2A	Xp11.21	17 (8.59%)	1 (0.20%)	5.41	4.67e-09	1.66e-07	(A) Metastasis
SPIN2B	Xp11.21	17 (8.59%)	1 (0.20%)	5.41	4.67e-09	1.66e-07	(A) Metastasis
IGFN1	1q32.1	36 (6.78%)	15 (1.28%)	2.41	4.75e-09	1.69e-07	(A) Metastasis
NR2F1-AS1	5q15	23 (0.86%)	43 (3.66%)	-2.09	5.16e-09	1.83e-07	(B) Primary
NDUFAF6	8q22.1	72 (13.56%)	60 (5.11%)	1.41	5.25e-09	1.86e-07	(A) Metastasis
CCN3	8q24.12	67 (12.62%)	53 (4.51%)	1.48	5.26e-09	1.86e-07	(A) Metastasis
CDH23	10q22.1	58 (10.92%)	41 (3.49%)	1.65	5.51e-09	1.94e-07	(A) Metastasis
CA2	8q21.2	74 (13.94%)	63 (5.37%)	1.38	5.6e-09	1.97e-07	(A) Metastasis
DCAF13	8q22.3	74 (13.94%)	63 (5.37%)	1.38	5.6e-09	1.97e-07	(A) Metastasis
CCDC152	5p12	19 (3.93%)	2 (0.17%)	4.53	5.85e-09	2.06e-07	(A) Metastasis
STOX1	10q22.1	42 (7.91%)	22 (1.86%)	2.09	6.06e-09	2.13e-07	(A) Metastasis
CTNNA3	10q21.3	44 (8.29%)	24 (2.04%)	2.02	6.23e-09	2.18e-07	(A) Metastasis
PIGA	Xp22.2	18 (9.09%)	12 (1.02%)	3.15	6.38e-09	2.23e-07	(A) Metastasis
TMEM183BP		27 (5.08%)	7 (0.60%)	3.09	6.46e-09	2.25e-07	(A) Metastasis
ATAD2	8q24.13	73 (13.75%)	62 (5.28%)	1.38	6.77e-09	2.25e-07	(A) Metastasis
CFAP418		73 (13.75%)	62 (5.28%)	1.38	6.77e-09	2.25e-07	(A) Metastasis
TATDN1	8q24.13	73 (13.75%)	62 (5.28%)	1.38	6.77e-09	2.25e-07	(A) Metastasis
CCDC197	14q32.12	0 (0.00%)	10 (2.02%)	<-10	6.79e-09	2.25e-07	(B) Primary
EMC3-AS1	3p25.3	0 (0.00%)	10 (2.02%)	<-10	6.79e-09	2.25e-07	(B) Primary
FAM181A-AS1	14q32.12	0 (0.00%)	10 (2.02%)	<-10	6.79e-09	2.25e-07	(B) Primary
GPC5-AS1	13q31.3	0 (0.00%)	10 (2.02%)	<-10	6.79e-09	2.25e-07	(B) Primary
HLTF-AS1	3q24	0 (0.00%)	10 (2.02%)	<-10	6.79e-09	2.25e-07	(B) Primary
IFI27L1	14q32.12	0 (0.00%)	10 (2.02%)	<-10	6.79e-09	2.25e-07	(B) Primary
IFI27L2	14q32.12	0 (0.00%)	10 (2.02%)	<-10	6.79e-09	2.25e-07	(B) Primary
LINC00379	13q31.3	0 (0.00%)	10 (2.02%)	<-10	6.79e-09	2.25e-07	(B) Primary
LINC00380	13q31.3	0 (0.00%)	10 (2.02%)	<-10	6.79e-09	2.25e-07	(B) Primary
LINC00507	12q24.32	0 (0.00%)	10 (2.02%)	<-10	6.79e-09	2.25e-07	(B) Primary
LINC01214	3q25.1	0 (0.00%)	10 (2.02%)	<-10	6.79e-09	2.25e-07	(B) Primary
LINC01363	1q24.1	0 (0.00%)	10 (2.02%)	<-10	6.79e-09	2.25e-07	(B) Primary
LINC01473	2q32.1	0 (0.00%)	10 (2.02%)	<-10	6.79e-09	2.25e-07	(B) Primary
LINC01541	18q22.3	0 (0.00%)	10 (2.02%)	<-10	6.79e-09	2.25e-07	(B) Primary
LINC02200	5q22.2	0 (0.00%)	10 (2.02%)	<-10	6.79e-09	2.25e-07	(B) Primary
LINC02368	12q24.32	0 (0.00%)	10 (2.02%)	<-10	6.79e-09	2.25e-07	(B) Primary
LINC02369	12q24.32	0 (0.00%)	10 (2.02%)	<-10	6.79e-09	2.25e-07	(B) Primary
LINC02375	12q24.32	0 (0.00%)	10 (2.02%)	<-10	6.79e-09	2.25e-07	(B) Primary
LINC02405	12q24.32	0 (0.00%)	10 (2.02%)	<-10	6.79e-09	2.25e-07	(B) Primary
LINC02582	18q22.3	0 (0.00%)	10 (2.02%)	<-10	6.79e-09	2.25e-07	(B) Primary
LINC02584	11q13.3	0 (0.00%)	10 (2.02%)	<-10	6.79e-09	2.25e-07	(B) Primary
LINC02864	18q22.3	0 (0.00%)	10 (2.02%)	<-10	6.79e-09	2.25e-07	(B) Primary
MALT1-AS1	18q21.32	0 (0.00%)	10 (2.02%)	<-10	6.79e-09	2.25e-07	(B) Primary
MEF2C-AS1	5q14.3	0 (0.00%)	10 (2.02%)	<-10	6.79e-09	2.25e-07	(B) Primary
NKX2-1-AS1	14q13.3	0 (0.00%)	10 (2.02%)	<-10	6.79e-09	2.25e-07	(B) Primary
OTUB2	14q32.12	0 (0.00%)	10 (2.02%)	<-10	6.79e-09	2.25e-07	(B) Primary
PAFAH1B2P2	12q23.1	0 (0.00%)	10 (2.02%)	<-10	6.79e-09	2.25e-07	(B) Primary
PRIMA1	14q32.12	0 (0.00%)	10 (2.02%)	<-10	6.79e-09	2.25e-07	(B) Primary
RASGRF2-AS1	5q14.1	0 (0.00%)	10 (2.02%)	<-10	6.79e-09	2.25e-07	(B) Primary
STEAP1B-AS1		0 (0.00%)	10 (2.02%)	<-10	6.79e-09	2.25e-07	(B) Primary
TICAM2-AS1		0 (0.00%)	10 (2.02%)	<-10	6.79e-09	2.25e-07	(B) Primary
ZNF32-AS1	10q11.21	0 (0.00%)	10 (2.02%)	<-10	6.79e-09	2.25e-07	(B) Primary
ZNF32-AS2	10q11.21	0 (0.00%)	10 (2.02%)	<-10	6.79e-09	2.25e-07	(B) Primary
MYBL1	8q13.1	68 (12.81%)	55 (4.68%)	1.45	7.01e-09	2.32e-07	(A) Metastasis
HNF4G	8q21.13	81 (15.25%)	74 (6.30%)	1.28	7.67e-09	2.53e-07	(A) Metastasis
VIRMA	8q22.1	81 (15.25%)	74 (6.30%)	1.28	7.67e-09	2.53e-07	(A) Metastasis
FCMR	1q32.1	28 (5.27%)	8 (0.68%)	2.95	7.75e-09	2.55e-07	(A) Metastasis
LMOD1	1q32.1	28 (5.27%)	8 (0.68%)	2.95	7.75e-09	2.55e-07	(A) Metastasis
DNAH8	6p21.2	41 (7.72%)	21 (1.79%)	2.11	8.18e-09	2.68e-07	(A) Metastasis
USP54	10q22.2	41 (7.72%)	21 (1.79%)	2.11	8.18e-09	2.68e-07	(A) Metastasis
DNAJC12	10q21.3	38 (7.16%)	18 (1.52%)	2.24	8.23e-09	2.69e-07	(A) Metastasis
MRPL13	8q24.12	67 (12.62%)	54 (4.60%)	1.46	8.42e-09	2.75e-07	(A) Metastasis
ZEB1-AS1	10p11.22	24 (4.97%)	6 (0.51%)	3.28	8.43e-09	2.75e-07	(A) Metastasis
SAT1	Xp22.11	22 (11.11%)	5 (1.01%)	3.46	8.76e-09	2.85e-07	(A) Metastasis
NUCKS1	1q32.1	40 (7.53%)	20 (1.70%)	2.14	8.83e-09	2.87e-07	(A) Metastasis
STAG3L2	7q11.23	40 (7.53%)	20 (1.70%)	2.14	8.83e-09	2.87e-07	(A) Metastasis
DYRK3	1q32.1	29 (5.46%)	9 (0.77%)	2.83	8.89e-09	2.89e-07	(A) Metastasis
CPQ	8q22.1	69 (12.99%)	57 (4.86%)	1.42	9.2e-09	2.97e-07	(A) Metastasis
RIDA	8q22.2	69 (12.99%)	57 (4.86%)	1.42	9.2e-09	2.97e-07	(A) Metastasis
RPL30	8q22.2	69 (12.99%)	57 (4.86%)	1.42	9.2e-09	2.97e-07	(A) Metastasis
PIK3R1	5q13.1	151 (5.55%)	109 (2.77%)	1	9.65e-09	3.12e-07	(A) Metastasis
RAB29	1q32.1	38 (7.16%)	18 (1.53%)	2.22	1e-08	3.24e-07	(A) Metastasis
E2F5	8q21.2	73 (13.75%)	63 (5.37%)	1.36	1.04e-08	3.36e-07	(A) Metastasis
ALAS2	Xp11.21	13 (6.57%)	4 (0.34%)	4.28	1.05e-08	3.36e-07	(A) Metastasis
THBS2	6q27	26 (5.38%)	8 (0.68%)	2.98	1.08e-08	3.48e-07	(A) Metastasis
PIK3C2B	1q32.1	45 (8.47%)	26 (2.21%)	1.94	1.09e-08	3.5e-07	(A) Metastasis
STK3	8q22.2	68 (12.81%)	56 (4.77%)	1.42	1.11e-08	3.54e-07	(A) Metastasis
CHMP4C	8q21.13	77 (14.50%)	69 (5.88%)	1.3	1.12e-08	3.57e-07	(A) Metastasis
CR1	1q32.2	35 (6.59%)	15 (1.28%)	2.37	1.13e-08	3.59e-07	(A) Metastasis
CASTOR2	7q11.23	38 (7.87%)	21 (1.79%)	2.14	1.13e-08	3.6e-07	(A) Metastasis
LPAR4	Xq21.1	6 (3.03%)	0 (0.00%)	>10	1.13e-08	3.6e-07	(A) Metastasis
FABP5	8q21.13	79 (14.88%)	72 (6.13%)	1.28	1.14e-08	3.6e-07	(A) Metastasis
PEX2	8q21.13	83 (15.63%)	78 (6.64%)	1.23	1.14e-08	3.6e-07	(A) Metastasis
BRCC3	Xq28	13 (6.57%)	4 (0.34%)	4.27	1.16e-08	3.65e-07	(A) Metastasis
FUNDC2	Xq28	13 (6.57%)	4 (0.34%)	4.27	1.16e-08	3.65e-07	(A) Metastasis
TAFAZZIN		13 (6.57%)	4 (0.34%)	4.27	1.16e-08	3.65e-07	(A) Metastasis
NECAB1	8q21.3	70 (13.18%)	59 (5.03%)	1.39	1.19e-08	3.75e-07	(A) Metastasis
OTUD6B	8q21.3	70 (13.18%)	59 (5.03%)	1.39	1.19e-08	3.75e-07	(A) Metastasis
PLEKHF2	8q22.1	70 (13.18%)	59 (5.03%)	1.39	1.19e-08	3.75e-07	(A) Metastasis
ETS2	21q22.2	10 (1.88%)	50 (9.90%)	-2.39	1.2e-08	3.78e-07	(B) Primary
CACNA1I	22q13.1	21 (3.95%)	3 (0.26%)	3.95	1.27e-08	3.97e-07	(A) Metastasis
CA13	8q21.2	74 (13.94%)	65 (5.54%)	1.33	1.32e-08	4.12e-07	(A) Metastasis
FZD6	8q22.3	74 (13.94%)	65 (5.54%)	1.33	1.32e-08	4.12e-07	(A) Metastasis
SLC25A32	8q22.3	74 (13.94%)	65 (5.54%)	1.33	1.32e-08	4.12e-07	(A) Metastasis
TACR2	10q22.1	43 (8.10%)	24 (2.04%)	1.99	1.36e-08	4.25e-07	(A) Metastasis
ZNF365	10q21.2	48 (9.04%)	30 (2.56%)	1.82	1.4e-08	4.37e-07	(A) Metastasis
RAB5C	17q21.2	0 (0.00%)	15 (1.28%)	<-10	1.45e-08	4.5e-07	(B) Primary
RNF139	8q24.13	71 (13.37%)	61 (5.20%)	1.36	1.53e-08	4.74e-07	(A) Metastasis
TP53INP1	8q22.1	71 (13.37%)	61 (5.20%)	1.36	1.53e-08	4.74e-07	(A) Metastasis
FER1L6	8q24.13	73 (13.75%)	64 (5.45%)	1.33	1.6e-08	4.95e-07	(A) Metastasis
CFAP70	10q22.2	47 (8.85%)	29 (2.47%)	1.84	1.6e-08	4.95e-07	(A) Metastasis
ZNF503	10q22.2	47 (8.85%)	29 (2.47%)	1.84	1.6e-08	4.95e-07	(A) Metastasis
ZNF704	8q21.13	85 (16.01%)	82 (6.98%)	1.2	1.63e-08	5.04e-07	(A) Metastasis
SPIN3	Xp11.21	16 (8.08%)	1 (0.20%)	5.32	1.64e-08	5.05e-07	(A) Metastasis
PPP3CB	10q22.2	41 (7.72%)	22 (1.87%)	2.04	1.66e-08	5.12e-07	(A) Metastasis
TERT	5p15.33	57 (2.09%)	22 (0.56%)	1.9	1.66e-08	5.12e-07	(A) Metastasis
RAD54B	8q22.1	77 (14.50%)	70 (5.96%)	1.28	1.68e-08	5.15e-07	(A) Metastasis
EIF2D	1q32.1	26 (4.90%)	7 (0.60%)	3.04	1.71e-08	5.22e-07	(A) Metastasis
PFKFB2	1q32.1	26 (4.90%)	7 (0.60%)	3.04	1.71e-08	5.22e-07	(A) Metastasis
MTBP	8q24.12	68 (12.81%)	57 (4.86%)	1.4	1.73e-08	5.3e-07	(A) Metastasis
MRPS16	10q22.2	40 (7.53%)	21 (1.79%)	2.07	1.82e-08	5.56e-07	(A) Metastasis
NCAPG2	7q36.3	40 (7.53%)	21 (1.79%)	2.07	1.82e-08	5.56e-07	(A) Metastasis
PDE7A	8q13.1	60 (11.30%)	46 (3.92%)	1.53	1.83e-08	5.57e-07	(A) Metastasis
PAGE2	Xp11.21	12 (6.06%)	3 (0.26%)	4.57	1.85e-08	5.63e-07	(A) Metastasis
SELENOP	5p12	18 (3.73%)	2 (0.17%)	4.45	1.87e-08	5.67e-07	(A) Metastasis
RECQL4	8q24.3	219 (8.05%)	185 (4.71%)	0.77	1.87e-08	5.69e-07	(A) Metastasis
SYNPO2L	10q22.2	44 (8.29%)	26 (2.19%)	1.92	1.88e-08	5.71e-07	(A) Metastasis
CA1	8q21.2	72 (13.56%)	63 (5.37%)	1.34	1.93e-08	5.84e-07	(A) Metastasis
CTHRC1	8q22.3	72 (13.56%)	63 (5.37%)	1.34	1.93e-08	5.84e-07	(A) Metastasis
RBIS	8q21.2	72 (13.56%)	63 (5.37%)	1.34	1.93e-08	5.84e-07	(A) Metastasis
HAUS7	Xq28	14 (7.07%)	6 (0.51%)	3.79	1.95e-08	5.89e-07	(A) Metastasis
DANCR	4q12	22 (4.55%)	5 (0.43%)	3.42	1.98e-08	5.94e-07	(A) Metastasis
DCUN1D4	4q12	22 (4.55%)	5 (0.43%)	3.42	1.98e-08	5.94e-07	(A) Metastasis
SNORA26	4q12	22 (4.55%)	5 (0.43%)	3.42	1.98e-08	5.94e-07	(A) Metastasis
PLA2G12B	10q22.1	39 (7.34%)	20 (1.70%)	2.11	1.98e-08	5.95e-07	(A) Metastasis
TNNT2	1q32.1	27 (5.08%)	8 (0.68%)	2.9	2.01e-08	6.01e-07	(A) Metastasis
HK1	10q22.1	45 (8.47%)	27 (2.30%)	1.88	2.07e-08	6.19e-07	(A) Metastasis
TAF2	8q24.12	67 (12.62%)	56 (4.77%)	1.4	2.09e-08	6.24e-07	(A) Metastasis
RBM33	7q36.3	21 (3.95%)	19 (0.62%)	2.67	2.12e-08	6.33e-07	(A) Metastasis
SUPT20HL2	Xp22.11	20 (10.10%)	4 (0.81%)	3.64	2.19e-08	6.54e-07	(A) Metastasis
ARNT	1q21.3	49 (9.23%)	32 (2.73%)	1.76	2.2e-08	6.55e-07	(A) Metastasis
AGO2	8q24.3	164 (8.44%)	138 (4.55%)	0.89	2.25e-08	6.68e-07	(A) Metastasis
PMS2P5	7q11.23	38 (7.87%)	22 (1.87%)	2.07	2.25e-08	6.69e-07	(A) Metastasis
FASN	17q25.3	28 (5.27%)	9 (0.77%)	2.78	2.26e-08	6.71e-07	(A) Metastasis
SLC41A1	1q32.1	37 (6.97%)	18 (1.53%)	2.18	2.29e-08	6.78e-07	(A) Metastasis
ENPP2	8q24.12	71 (13.37%)	62 (5.28%)	1.34	2.34e-08	6.91e-07	(A) Metastasis
MTSS1	8q24.13	71 (13.37%)	62 (5.28%)	1.34	2.34e-08	6.91e-07	(A) Metastasis
ARHGEF38	4q24	12 (0.45%)	31 (2.62%)	-2.54	2.38e-08	7.01e-07	(B) Primary
PM20D1	1q32.1	36 (6.78%)	17 (1.45%)	2.23	2.43e-08	7.16e-07	(A) Metastasis
LAMA5	20q13.33	29 (5.46%)	10 (0.85%)	2.68	2.46e-08	7.24e-07	(A) Metastasis
MYO16	13q33.3	29 (5.46%)	10 (0.85%)	2.68	2.46e-08	7.24e-07	(A) Metastasis
COL6A6	3q22.1	48 (9.04%)	31 (2.64%)	1.78	2.54e-08	7.46e-07	(A) Metastasis
ASL	7q11.21	30 (5.65%)	11 (0.94%)	2.59	2.61e-08	7.63e-07	(A) Metastasis
TTBK1	6p21.1	30 (5.65%)	11 (0.94%)	2.59	2.61e-08	7.63e-07	(A) Metastasis
DNAJC9-AS1	10q22.2	37 (7.66%)	21 (1.79%)	2.1	2.63e-08	7.68e-07	(A) Metastasis
MRGPRF	11q13.3	43 (8.10%)	25 (2.13%)	1.93	2.63e-08	7.68e-07	(A) Metastasis
MYOZ1	10q22.2	43 (8.10%)	25 (2.13%)	1.93	2.63e-08	7.68e-07	(A) Metastasis
ARSI	5q32	34 (6.40%)	15 (1.28%)	2.33	2.64e-08	7.68e-07	(A) Metastasis
MYBPH	1q32.1	34 (6.40%)	15 (1.28%)	2.33	2.64e-08	7.68e-07	(A) Metastasis
PIN4	Xq13.1	11 (5.56%)	2 (0.17%)	5.03	2.64e-08	7.68e-07	(A) Metastasis
IPO9	1q32.1	31 (5.84%)	12 (1.02%)	2.51	2.69e-08	7.81e-07	(A) Metastasis
FAM219A	9p13.3	24 (4.97%)	7 (0.60%)	3.06	2.72e-08	7.9e-07	(A) Metastasis
MDM4	1q32.1	72 (2.65%)	35 (0.89%)	1.57	2.78e-08	8.03e-07	(A) Metastasis
FYB1	5p13.1	23 (4.33%)	5 (0.43%)	3.35	2.84e-08	8.2e-07	(A) Metastasis
IL10	1q32.1	52 (1.91%)	19 (0.48%)	1.98	2.91e-08	8.41e-07	(A) Metastasis
CCNE2	8q22.1	72 (13.56%)	64 (5.45%)	1.31	2.93e-08	8.44e-07	(A) Metastasis
XKR9	8q13.3	72 (13.56%)	64 (5.45%)	1.31	2.93e-08	8.44e-07	(A) Metastasis
SLCO5A1	8q13.3	74 (13.94%)	67 (5.71%)	1.29	3e-08	8.63e-07	(A) Metastasis
C9ORF24	9p13.3	27 (5.59%)	10 (0.85%)	2.71	3.1e-08	8.9e-07	(A) Metastasis
DNAI1	9p13.3	27 (5.59%)	10 (0.85%)	2.71	3.1e-08	8.9e-07	(A) Metastasis
SRY	Yp11.2	13 (6.57%)	1 (0.15%)	5.48	3.2e-08	9.17e-07	(A) Metastasis
BMT2	7q31.1	13 (0.48%)	31 (2.64%)	-2.47	3.5e-08	1e-06	(B) Primary
PCDH11Y	Yp11.2	9 (18.75%)	13 (1.11%)	4.08	3.5e-08	1e-06	(A) Metastasis
ZNF572	8q24.13	71 (13.37%)	63 (5.37%)	1.32	3.55e-08	1.01e-06	(A) Metastasis
MPP1	Xq28	13 (6.57%)	5 (0.43%)	3.95	3.63e-08	1.04e-06	(A) Metastasis
TRPS1	8q23.3	73 (13.75%)	66 (5.62%)	1.29	3.64e-08	1.04e-06	(A) Metastasis
DDX53	Xp22.11	20 (3.77%)	3 (0.26%)	3.88	3.66e-08	1.04e-06	(A) Metastasis
PTCHD1	Xp22.11	20 (3.77%)	3 (0.26%)	3.88	3.66e-08	1.04e-06	(A) Metastasis
SNX16	8q21.13	75 (14.12%)	69 (5.88%)	1.26	3.69e-08	1.05e-06	(A) Metastasis
CHIC1	Xq13.2	8 (1.51%)	0 (0.00%)	>10	3.85e-08	1.09e-06	(A) Metastasis
PTK2	8q24.3	70 (3.31%)	91 (7.68%)	-1.21	3.87e-08	1.1e-06	(B) Primary
ABCA13	7p12.3	51 (9.60%)	36 (3.04%)	1.66	3.9e-08	1.1e-06	(A) Metastasis
CCNQ	Xq28	32 (1.99%)	6 (0.26%)	2.96	3.95e-08	1.12e-06	(A) Metastasis
FAM149B1	10q22.2	39 (7.34%)	21 (1.79%)	2.04	4.03e-08	1.13e-06	(A) Metastasis
LRRTM3	10q21.3	39 (7.34%)	21 (1.79%)	2.04	4.03e-08	1.13e-06	(A) Metastasis
PLXNA2	1q32.2	38 (7.16%)	20 (1.70%)	2.07	4.41e-08	1.21e-06	(A) Metastasis
ADAMTSL4-AS1	1q21.2	0 (0.00%)	9 (1.82%)	<-10	4.49e-08	1.21e-06	(B) Primary
AGAP12P	10q11.22	0 (0.00%)	9 (1.82%)	<-10	4.49e-08	1.21e-06	(B) Primary
ANTXRLP1	10q11.22	0 (0.00%)	9 (1.82%)	<-10	4.49e-08	1.21e-06	(B) Primary
CKMT2-AS1	5q14.1	0 (0.00%)	9 (1.82%)	<-10	4.49e-08	1.21e-06	(B) Primary
CRADD-AS1		0 (0.00%)	9 (1.82%)	<-10	4.49e-08	1.21e-06	(B) Primary
CRPPA-AS1	7p21.2	0 (0.00%)	9 (1.82%)	<-10	4.49e-08	1.21e-06	(B) Primary
FALEC	1q21.2	0 (0.00%)	9 (1.82%)	<-10	4.49e-08	1.21e-06	(B) Primary
FTO-IT1	16q12.2	0 (0.00%)	9 (1.82%)	<-10	4.49e-08	1.21e-06	(B) Primary
GLUD1P2	10q11.22	0 (0.00%)	9 (1.82%)	<-10	4.49e-08	1.21e-06	(B) Primary
GLUD1P3	10q22.2	0 (0.00%)	9 (1.82%)	<-10	4.49e-08	1.21e-06	(B) Primary
GOLGA7B-DT		0 (0.00%)	9 (1.82%)	<-10	4.49e-08	1.21e-06	(B) Primary
GPC6-AS1	13q31.3	0 (0.00%)	9 (1.82%)	<-10	4.49e-08	1.21e-06	(B) Primary
HAGLROS	2q31.1	0 (0.00%)	9 (1.82%)	<-10	4.49e-08	1.21e-06	(B) Primary
LINC00908	18q23	0 (0.00%)	9 (1.82%)	<-10	4.49e-08	1.21e-06	(B) Primary
LINC01117	2q31.1	0 (0.00%)	9 (1.82%)	<-10	4.49e-08	1.21e-06	(B) Primary
LINC01213	3q25.1	0 (0.00%)	9 (1.82%)	<-10	4.49e-08	1.21e-06	(B) Primary
LINC01544	18q21.33	0 (0.00%)	9 (1.82%)	<-10	4.49e-08	1.21e-06	(B) Primary
LINC02059	5q14.3	0 (0.00%)	9 (1.82%)	<-10	4.49e-08	1.21e-06	(B) Primary
LINC02888	7p21.1	0 (0.00%)	9 (1.82%)	<-10	4.49e-08	1.21e-06	(B) Primary
LINC02889	7p21.1	0 (0.00%)	9 (1.82%)	<-10	4.49e-08	1.21e-06	(B) Primary
NPY4R2	10q11.22	0 (0.00%)	9 (1.82%)	<-10	4.49e-08	1.21e-06	(B) Primary
NT5C3B	17q21.2	0 (0.00%)	9 (1.82%)	<-10	4.49e-08	1.21e-06	(B) Primary
NUDT4B	1q21.2	0 (0.00%)	9 (1.82%)	<-10	4.49e-08	1.21e-06	(B) Primary
NUDT4P2	1q21.1	0 (0.00%)	9 (1.82%)	<-10	4.49e-08	1.21e-06	(B) Primary
NUTM2B	10q22.3	0 (0.00%)	9 (1.82%)	<-10	4.49e-08	1.21e-06	(B) Primary
OACYLP	18q21.32	0 (0.00%)	9 (1.82%)	<-10	4.49e-08	1.21e-06	(B) Primary
ODAD4	17q21.2	0 (0.00%)	9 (1.82%)	<-10	4.49e-08	1.21e-06	(B) Primary
PGAM1P5	12q22	0 (0.00%)	9 (1.82%)	<-10	4.49e-08	1.21e-06	(B) Primary
PPEF1-AS1	Xp22.13	0 (0.00%)	9 (1.82%)	<-10	4.49e-08	1.21e-06	(B) Primary
RERG-AS1	12p12.3	0 (0.00%)	9 (1.82%)	<-10	4.49e-08	1.21e-06	(B) Primary
SOX21-AS1	13q32.1	0 (0.00%)	9 (1.82%)	<-10	4.49e-08	1.21e-06	(B) Primary
THRIL	12q24.31	0 (0.00%)	9 (1.82%)	<-10	4.49e-08	1.21e-06	(B) Primary
ZNF516-DT	18q23	0 (0.00%)	9 (1.82%)	<-10	4.49e-08	1.21e-06	(B) Primary
ZNF84-DT	12q24.33	0 (0.00%)	9 (1.82%)	<-10	4.49e-08	1.21e-06	(B) Primary
ZNF891	12q24.33	0 (0.00%)	9 (1.82%)	<-10	4.49e-08	1.21e-06	(B) Primary
INPPL1	11q13.4	59 (3.04%)	28 (0.93%)	1.71	4.57e-08	1.23e-06	(A) Metastasis
FLCN	17p11.2	50 (1.84%)	18 (0.46%)	2	4.64e-08	1.25e-06	(A) Metastasis
ANKRD11	16q24.3	115 (4.46%)	77 (2.06%)	1.11	4.9e-08	1.32e-06	(A) Metastasis
AP2A2	11p15.5	18 (3.73%)	85 (12.50%)	-1.75	4.92e-08	1.32e-06	(B) Primary
TPD52	8q21.13	83 (15.63%)	82 (6.98%)	1.16	5.06e-08	1.36e-06	(A) Metastasis
MAK	6p24.2	26 (4.90%)	8 (0.68%)	2.85	5.15e-08	1.38e-06	(A) Metastasis
TMEM9	1q32.1	26 (4.90%)	8 (0.68%)	2.85	5.15e-08	1.38e-06	(A) Metastasis
FAM9C	Xp22.2	18 (9.09%)	3 (0.61%)	3.9	5.16e-08	1.38e-06	(A) Metastasis
SMPX	Xp22.12	18 (9.09%)	3 (0.61%)	3.9	5.16e-08	1.38e-06	(A) Metastasis
TCEANC	Xp22.2	18 (9.09%)	3 (0.61%)	3.9	5.16e-08	1.38e-06	(A) Metastasis
TRMT12	8q24.13	69 (12.99%)	61 (5.20%)	1.32	5.19e-08	1.38e-06	(A) Metastasis
MRPS28	8q21.13	81 (15.25%)	79 (6.73%)	1.18	5.22e-08	1.39e-06	(A) Metastasis
RTKN2	10q21.2	47 (8.85%)	31 (2.64%)	1.75	5.23e-08	1.39e-06	(A) Metastasis
TESMIN	11q13.3	47 (8.85%)	31 (2.64%)	1.75	5.23e-08	1.39e-06	(A) Metastasis
STMN2	8q21.13	79 (14.88%)	76 (6.47%)	1.2	5.35e-08	1.42e-06	(A) Metastasis
IL7	8q21.13	77 (14.50%)	73 (6.22%)	1.22	5.43e-08	1.44e-06	(A) Metastasis
RUNX1T1	8q21.3	73 (13.75%)	67 (5.71%)	1.27	5.43e-08	1.44e-06	(A) Metastasis
KDM5D	Yq11.223	17 (3.20%)	6 (0.30%)	3.44	5.55e-08	1.47e-06	(A) Metastasis
C4ORF48	4p16.3	19 (0.70%)	36 (3.07%)	-2.13	5.56e-08	1.47e-06	(B) Primary
AGAP5	10q22.2	42 (7.91%)	25 (2.13%)	1.89	5.62e-08	1.48e-06	(A) Metastasis
ARL8A	1q32.1	27 (5.08%)	9 (0.77%)	2.73	5.7e-08	1.5e-06	(A) Metastasis
PHLDA3	1q32.1	27 (5.08%)	9 (0.77%)	2.73	5.7e-08	1.5e-06	(A) Metastasis
ERVMER34-1	4q12	21 (4.35%)	5 (0.43%)	3.35	5.72e-08	1.5e-06	(A) Metastasis
LINC01618	4q12	21 (4.35%)	5 (0.43%)	3.35	5.72e-08	1.5e-06	(A) Metastasis
ZEB1	10p11.22	34 (6.40%)	16 (1.36%)	2.23	5.86e-08	1.54e-06	(A) Metastasis
TTN	2q31.2	143 (26.93%)	184 (15.67%)	0.78	6.09e-08	1.59e-06	(A) Metastasis
CHI3L1	1q32.1	28 (5.27%)	10 (0.85%)	2.63	6.11e-08	1.6e-06	(A) Metastasis
ANXA13	8q24.13	68 (12.81%)	60 (5.11%)	1.33	6.28e-08	1.62e-06	(A) Metastasis
DERL1	8q24.13	68 (12.81%)	60 (5.11%)	1.33	6.28e-08	1.62e-06	(A) Metastasis
GSDMC	8q24.21	68 (12.81%)	60 (5.11%)	1.33	6.28e-08	1.62e-06	(A) Metastasis
UQCRB	8q22.1	68 (12.81%)	60 (5.11%)	1.33	6.28e-08	1.62e-06	(A) Metastasis
CXORF51B	Xq27.3	5 (3.33%)	0 (0.00%)	>10	6.3e-08	1.62e-06	(A) Metastasis
DMRTC1B	Xq13.1	5 (3.33%)	0 (0.00%)	>10	6.3e-08	1.62e-06	(A) Metastasis
FAM226A	Xq13.1	5 (3.33%)	0 (0.00%)	>10	6.3e-08	1.62e-06	(A) Metastasis
FAM226B	Xq13.1	5 (3.33%)	0 (0.00%)	>10	6.3e-08	1.62e-06	(A) Metastasis
FAM236A	Xq13.1	5 (3.33%)	0 (0.00%)	>10	6.3e-08	1.62e-06	(A) Metastasis
GOLGA2P6	10p11.23	5 (3.33%)	0 (0.00%)	>10	6.3e-08	1.62e-06	(A) Metastasis
MAP2K4P1	Xq13.2	5 (3.33%)	0 (0.00%)	>10	6.3e-08	1.62e-06	(A) Metastasis
MIR646HG	20q13.33	5 (3.33%)	0 (0.00%)	>10	6.3e-08	1.62e-06	(A) Metastasis
MT-ATP6	mitochondria	5 (3.33%)	0 (0.00%)	>10	6.3e-08	1.62e-06	(A) Metastasis
PABPC1L2B	Xq13.2	5 (3.33%)	0 (0.00%)	>10	6.3e-08	1.62e-06	(A) Metastasis
TSIX	Xq13.2	5 (3.33%)	0 (0.00%)	>10	6.3e-08	1.62e-06	(A) Metastasis
XIST	Xq13.2	5 (3.33%)	0 (0.00%)	>10	6.3e-08	1.62e-06	(A) Metastasis
CENPF	1q41	32 (6.03%)	14 (1.19%)	2.34	6.35e-08	1.63e-06	(A) Metastasis
CYB5R1	1q32.1	29 (5.46%)	11 (0.94%)	2.54	6.36e-08	1.63e-06	(A) Metastasis
CANT1	17q25.3	12 (6.06%)	4 (0.34%)	4.15	6.47e-08	1.65e-06	(A) Metastasis
NPFFR2	4q13.3	31 (5.84%)	13 (1.11%)	2.4	6.47e-08	1.65e-06	(A) Metastasis
FMOD	1q32.1	30 (5.65%)	12 (1.02%)	2.47	6.48e-08	1.65e-06	(A) Metastasis
CSPP1	8q13.1-q13.2	72 (13.56%)	66 (5.62%)	1.27	6.58e-08	1.68e-06	(A) Metastasis
SGCB	4q12	22 (4.55%)	6 (0.51%)	3.16	6.75e-08	1.72e-06	(A) Metastasis
MED30	8q24.11	63 (11.86%)	53 (4.51%)	1.39	6.81e-08	1.73e-06	(A) Metastasis
SUPT20HL1	Xp22.11	19 (9.60%)	4 (0.81%)	3.57	6.86e-08	1.74e-06	(A) Metastasis
BMS1P4	10q22.2	39 (8.07%)	25 (2.13%)	1.92	6.89e-08	1.75e-06	(A) Metastasis
IL11RA	9p13.3	29 (6.00%)	13 (1.11%)	2.44	6.92e-08	1.76e-06	(A) Metastasis
KCNN3	1q21.3	37 (6.97%)	40 (2.00%)	1.8	6.96e-08	1.76e-06	(A) Metastasis
CTSK	1q21.3	45 (8.47%)	29 (2.47%)	1.78	6.96e-08	1.76e-06	(A) Metastasis
DUSP4	8p12	97 (4.99%)	66 (2.18%)	1.19	7.32e-08	1.85e-06	(A) Metastasis
VCP	9p13.3	28 (5.80%)	12 (1.02%)	2.5	7.43e-08	1.88e-06	(A) Metastasis
DEPTOR	8q24.12	67 (12.62%)	59 (5.03%)	1.33	7.58e-08	1.91e-06	(A) Metastasis
LRRC69	8q21.3	67 (12.62%)	59 (5.03%)	1.33	7.58e-08	1.91e-06	(A) Metastasis
HEY1	8q21.13	79 (14.88%)	77 (6.56%)	1.18	7.74e-08	1.95e-06	(A) Metastasis
PAPSS2	10q23.2-q23.31	102 (19.21%)	115 (9.70%)	0.99	7.78e-08	1.96e-06	(A) Metastasis
MTERF3	8q22.1	69 (12.99%)	62 (5.28%)	1.3	7.83e-08	1.97e-06	(A) Metastasis
ELK4	1q32.1	39 (7.34%)	22 (1.87%)	1.97	7.93e-08	1.99e-06	(A) Metastasis
DDIT4	10q22.1	44 (8.29%)	28 (2.39%)	1.8	7.99e-08	2e-06	(A) Metastasis
MTFR1	8q13.1	57 (10.73%)	45 (3.83%)	1.49	8.09e-08	2.02e-06	(A) Metastasis
CNTFR	9p13.3	25 (5.18%)	9 (0.77%)	2.76	8.14e-08	2.04e-06	(A) Metastasis
C10ORF55	10q22.2	46 (8.66%)	31 (2.62%)	1.73	8.59e-08	2.14e-06	(A) Metastasis
ATP6V0D2	8q21.3	64 (12.05%)	55 (4.68%)	1.36	8.73e-08	2.18e-06	(A) Metastasis
ESYT2	7q36.3	38 (7.16%)	21 (1.79%)	2	8.8e-08	2.19e-06	(A) Metastasis
PCOLCE2	3q23	38 (7.16%)	21 (1.79%)	2	8.8e-08	2.19e-06	(A) Metastasis
RCC1L	7q11.23	38 (7.16%)	21 (1.79%)	2	8.8e-08	2.19e-06	(A) Metastasis
SPEG	2q35	38 (7.16%)	21 (1.79%)	2	8.8e-08	2.19e-06	(A) Metastasis
CEP70	3q22.3	43 (8.10%)	27 (2.30%)	1.82	9.15e-08	2.27e-06	(A) Metastasis
P4HA1	10q22.1	43 (8.10%)	27 (2.30%)	1.82	9.15e-08	2.27e-06	(A) Metastasis
NTAQ1	8q24.13	66 (12.43%)	58 (4.94%)	1.33	9.16e-08	2.27e-06	(A) Metastasis
GRK2	11q13.2	47 (8.85%)	32 (2.73%)	1.7	9.18e-08	2.27e-06	(A) Metastasis
ZNF148	3q21.2	21 (3.95%)	22 (0.71%)	2.48	9.37e-08	2.32e-06	(A) Metastasis
SULF1	8q13.2-q13.3	76 (14.31%)	73 (6.22%)	1.2	9.61e-08	2.37e-06	(A) Metastasis
CYP7B1	8q12.3	56 (10.55%)	44 (3.75%)	1.49	9.64e-08	2.38e-06	(A) Metastasis
SQLE	8q24.13	70 (13.18%)	64 (5.45%)	1.27	9.66e-08	2.38e-06	(A) Metastasis
ELOVL2	6p24.2	23 (4.33%)	6 (0.51%)	3.08	9.75e-08	2.39e-06	(A) Metastasis
FZD8	10p11.21	23 (4.33%)	6 (0.51%)	3.08	9.75e-08	2.39e-06	(A) Metastasis
OFD1	Xp22.2	23 (4.33%)	6 (0.51%)	3.08	9.75e-08	2.39e-06	(A) Metastasis
FGFR1	8p11.23	143 (5.26%)	107 (2.73%)	0.94	1.02e-07	2.5e-06	(A) Metastasis
RUSC2	9p13.3	34 (6.40%)	17 (1.43%)	2.16	1.05e-07	2.57e-06	(A) Metastasis
ARHGAP4	Xq28	19 (3.58%)	3 (0.26%)	3.81	1.05e-07	2.57e-06	(A) Metastasis
ZXDB	Xp11.21	28 (5.27%)	1 (0.20%)	4.7	1.05e-07	2.57e-06	(A) Metastasis
SLC9A6	Xq26.3	11 (5.56%)	3 (0.26%)	4.44	1.08e-07	2.63e-06	(A) Metastasis
SPANXN5	Xp11.22	11 (5.56%)	3 (0.26%)	4.44	1.08e-07	2.63e-06	(A) Metastasis
ANXA2P3	10q21.3	32 (6.63%)	17 (1.45%)	2.19	1.09e-07	2.65e-06	(A) Metastasis
DLL1	6q27	18 (5.41%)	7 (0.60%)	3.18	1.1e-07	2.67e-06	(A) Metastasis
BCAP31	Xq28	16 (8.08%)	2 (0.40%)	4.32	1.1e-07	2.67e-06	(A) Metastasis
SSR4	Xq28	16 (8.08%)	2 (0.40%)	4.32	1.1e-07	2.67e-06	(A) Metastasis
SDC2	8q22.1	65 (12.24%)	57 (4.86%)	1.33	1.1e-07	2.68e-06	(A) Metastasis
PAG1	8q21.13	79 (14.88%)	78 (6.64%)	1.16	1.11e-07	2.7e-06	(A) Metastasis
ARMC1	8q13.1	55 (10.36%)	43 (3.66%)	1.5	1.15e-07	2.78e-06	(A) Metastasis
CD55	1q32.2	24 (4.52%)	7 (0.60%)	2.92	1.16e-07	2.8e-06	(A) Metastasis
SHISA4	1q32.1	24 (4.52%)	7 (0.60%)	2.92	1.16e-07	2.8e-06	(A) Metastasis
FAM91A1	8q24.13	69 (12.99%)	63 (5.37%)	1.28	1.17e-07	2.82e-06	(A) Metastasis
KLHL38	8q24.13	69 (12.99%)	63 (5.37%)	1.28	1.17e-07	2.82e-06	(A) Metastasis
COMTD1	10q22.2	45 (8.47%)	30 (2.56%)	1.73	1.24e-07	2.98e-06	(A) Metastasis
DNAAF5	7p22.3	34 (6.40%)	17 (1.45%)	2.14	1.25e-07	3.01e-06	(A) Metastasis
KIF5B	10p11.22	27 (5.08%)	10 (0.84%)	2.59	1.29e-07	3.11e-06	(A) Metastasis
GCM2	6p24.2	25 (4.71%)	8 (0.68%)	2.79	1.31e-07	3.14e-06	(A) Metastasis
IL19	1q32.1	25 (4.71%)	8 (0.68%)	2.79	1.31e-07	3.14e-06	(A) Metastasis
ZFX	Xp22.11	25 (4.71%)	8 (0.68%)	2.79	1.31e-07	3.14e-06	(A) Metastasis
RECK	9p13.3	28 (5.27%)	11 (0.93%)	2.51	1.32e-07	3.16e-06	(A) Metastasis
CCIN	9p13.3	29 (5.46%)	12 (1.01%)	2.43	1.32e-07	3.16e-06	(A) Metastasis
AFDN	6q27	20 (4.14%)	23 (0.74%)	2.48	1.33e-07	3.17e-06	(A) Metastasis
C8ORF44	8q13.1	64 (12.05%)	56 (4.77%)	1.34	1.33e-07	3.18e-06	(A) Metastasis
VPS37D	7q11.23	33 (6.21%)	16 (1.36%)	2.19	1.34e-07	3.18e-06	(A) Metastasis
NUDT13	10q22.2	40 (7.53%)	24 (2.04%)	1.88	1.35e-07	3.21e-06	(A) Metastasis
C8ORF76	8q24.13	66 (12.43%)	59 (5.03%)	1.31	1.38e-07	3.29e-06	(A) Metastasis
GC	4q13.3	32 (6.03%)	15 (1.28%)	2.24	1.41e-07	3.35e-06	(A) Metastasis
HTR5A	7q36.2	32 (6.03%)	15 (1.28%)	2.24	1.41e-07	3.35e-06	(A) Metastasis
GDF6	8q22.1	68 (12.81%)	62 (5.28%)	1.28	1.42e-07	3.35e-06	(A) Metastasis
NDUFB9	8q24.13	68 (12.81%)	62 (5.28%)	1.28	1.42e-07	3.35e-06	(A) Metastasis
RBM12B	8q22.1	72 (13.56%)	68 (5.79%)	1.23	1.43e-07	3.39e-06	(A) Metastasis
ADAM19	5q33.3	27 (5.08%)	10 (0.85%)	2.58	1.5e-07	3.54e-06	(A) Metastasis
ZNF503-AS1	10q22.2	41 (8.49%)	29 (2.47%)	1.78	1.51e-07	3.57e-06	(A) Metastasis
ZNF503-AS2	10q22.2	41 (8.49%)	29 (2.47%)	1.78	1.51e-07	3.57e-06	(A) Metastasis
ECD	10q22.2	39 (7.34%)	23 (1.96%)	1.91	1.52e-07	3.57e-06	(A) Metastasis
PAQR9	3q23	39 (7.34%)	23 (1.96%)	1.91	1.52e-07	3.57e-06	(A) Metastasis
ZBTB38	3q23	39 (7.34%)	23 (1.96%)	1.91	1.52e-07	3.57e-06	(A) Metastasis
IPMK	10q21.1	28 (5.27%)	11 (0.94%)	2.49	1.54e-07	3.61e-06	(A) Metastasis
ARHGAP12	10p11.22	29 (5.46%)	12 (1.02%)	2.42	1.54e-07	3.61e-06	(A) Metastasis
BTG2	1q32.1	29 (5.46%)	12 (1.02%)	2.42	1.54e-07	3.61e-06	(A) Metastasis
C9ORF131	9p13.3	29 (5.46%)	12 (1.02%)	2.42	1.54e-07	3.61e-06	(A) Metastasis
PPFIA4	1q32.1	29 (5.46%)	12 (1.02%)	2.42	1.54e-07	3.61e-06	(A) Metastasis
TSR2	Xp11.22	10 (5.05%)	2 (0.17%)	4.89	1.62e-07	3.79e-06	(A) Metastasis
ZNF449	Xq26.3	10 (5.05%)	2 (0.17%)	4.89	1.62e-07	3.79e-06	(A) Metastasis
DGAT2L6	Xq13.1	17 (8.59%)	3 (0.61%)	3.82	1.65e-07	3.84e-06	(A) Metastasis
SMS	Xp22.11	17 (8.59%)	3 (0.61%)	3.82	1.65e-07	3.84e-06	(A) Metastasis
COL6A5	3q22.1	43 (8.10%)	28 (2.39%)	1.76	1.65e-07	3.84e-06	(A) Metastasis
TBC1D31	8q24.13	65 (12.24%)	58 (4.94%)	1.31	1.67e-07	3.88e-06	(A) Metastasis
FIRRM		19 (3.58%)	25 (0.64%)	2.49	1.67e-07	3.88e-06	(A) Metastasis
IQSEC2	Xp11.22	17 (3.20%)	2 (0.17%)	4.23	1.77e-07	4.11e-06	(A) Metastasis
PPFIA1	11q13.3	46 (8.66%)	32 (2.73%)	1.67	1.85e-07	4.29e-06	(A) Metastasis
DNAJC9	10q22.2	37 (6.97%)	21 (1.79%)	1.96	1.91e-07	4.41e-06	(A) Metastasis
NIPBL	5p13.2	37 (6.97%)	21 (1.79%)	1.96	1.91e-07	4.41e-06	(A) Metastasis
RBP2	3q23	37 (6.97%)	21 (1.79%)	1.96	1.91e-07	4.41e-06	(A) Metastasis
MAGEH1	Xp11.21	14 (7.07%)	1 (0.20%)	5.13	1.97e-07	4.55e-06	(A) Metastasis
COLEC10	8q24.12	64 (12.05%)	57 (4.86%)	1.31	2.02e-07	4.65e-06	(A) Metastasis
KCNB2	8q21.11	83 (15.63%)	86 (7.33%)	1.09	2.04e-07	4.71e-06	(A) Metastasis
VCPIP1	8q13.1	66 (12.43%)	60 (5.11%)	1.28	2.07e-07	4.77e-06	(A) Metastasis
SPATA31F1		25 (5.18%)	10 (0.85%)	2.6	2.08e-07	4.79e-06	(A) Metastasis
INTS8	8q22.1	70 (13.18%)	66 (5.62%)	1.23	2.1e-07	4.83e-06	(A) Metastasis
EPCAM	2p21	42 (1.54%)	14 (0.36%)	2.11	2.11e-07	4.83e-06	(A) Metastasis
TRAPPC2	Xp22.2	18 (9.09%)	4 (0.81%)	3.49	2.12e-07	4.86e-06	(A) Metastasis
CNGA1	4p12	23 (4.76%)	8 (0.68%)	2.8	2.12e-07	4.86e-06	(A) Metastasis
CCL19	9p13.3	24 (4.97%)	9 (0.77%)	2.7	2.13e-07	4.88e-06	(A) Metastasis
PPP6R3	11q13	41 (7.72%)	26 (2.21%)	1.8	2.18e-07	4.97e-06	(A) Metastasis
PRR23C	3q23	41 (7.72%)	26 (2.21%)	1.8	2.18e-07	4.97e-06	(A) Metastasis
KCNK12	2p16.3	22 (4.14%)	6 (0.51%)	3.03	2.26e-07	5.15e-06	(A) Metastasis
LRIT2	10q23.1	48 (9.04%)	35 (2.98%)	1.6	2.28e-07	5.2e-06	(A) Metastasis
GOLGA6L10	15q25.2	5 (2.53%)	0 (0.00%)	>10	2.42e-07	5.52e-06	(A) Metastasis
HAS2	8q24.13	63 (11.86%)	56 (4.77%)	1.31	2.43e-07	5.53e-06	(A) Metastasis
SAMD12	8q24.11-q24.12	63 (11.86%)	56 (4.77%)	1.31	2.43e-07	5.53e-06	(A) Metastasis
FUT11	10q22.2	44 (8.29%)	30 (2.56%)	1.7	2.51e-07	5.69e-06	(A) Metastasis
NAXD	13q34	13 (6.57%)	7 (0.60%)	3.46	2.51e-07	5.69e-06	(A) Metastasis
PLAU	10q22.2	46 (8.66%)	33 (2.78%)	1.64	2.54e-07	5.77e-06	(A) Metastasis
MTPAP	10p11.23	22 (4.14%)	6 (0.51%)	3.02	2.56e-07	5.8e-06	(A) Metastasis
CABCOCO1	10q21.2	47 (8.85%)	34 (2.90%)	1.61	2.68e-07	6.06e-06	(A) Metastasis
ZSWIM8	10q22.2	47 (8.85%)	34 (2.90%)	1.61	2.68e-07	6.06e-06	(A) Metastasis
CSMD3	8q23.3	102 (19.21%)	118 (10.05%)	0.93	2.73e-07	6.15e-06	(A) Metastasis
AFP	4q13.3	31 (5.84%)	15 (1.27%)	2.21	2.74e-07	6.15e-06	(A) Metastasis
GPR37L1	1q32.1	33 (6.21%)	17 (1.45%)	2.1	2.79e-07	6.15e-06	(A) Metastasis
TCOF1	5q32-q33.1	33 (6.21%)	17 (1.45%)	2.1	2.79e-07	6.15e-06	(A) Metastasis
MRPS22	3q23	39 (7.34%)	24 (2.04%)	1.85	2.83e-07	6.15e-06	(A) Metastasis
MNX1-AS1	7q36.3	30 (6.21%)	16 (1.36%)	2.19	2.92e-07	6.15e-06	(A) Metastasis
BAALC-AS2	8q22.3	62 (12.84%)	62 (5.28%)	1.28	2.94e-07	6.15e-06	(A) Metastasis
AARSD1	17q21.31	0 (0.00%)	8 (1.62%)	<-10	2.96e-07	6.15e-06	(B) Primary
ANKRD20A19P	13q12.12	0 (0.00%)	8 (1.62%)	<-10	2.96e-07	6.15e-06	(B) Primary
BEAN1-AS1	16q21	0 (0.00%)	8 (1.62%)	<-10	2.96e-07	6.15e-06	(B) Primary
CCDC144NL-AS1	17p11.2	0 (0.00%)	8 (1.62%)	<-10	2.96e-07	6.15e-06	(B) Primary
CCDC200	17q21.31	0 (0.00%)	8 (1.62%)	<-10	2.96e-07	6.15e-06	(B) Primary
CCNYL2	10q11.21	0 (0.00%)	8 (1.62%)	<-10	2.96e-07	6.15e-06	(B) Primary
CCR10	17q21.2	0 (0.00%)	8 (1.62%)	<-10	2.96e-07	6.15e-06	(B) Primary
CDK6-AS1	7q21.2	0 (0.00%)	8 (1.62%)	<-10	2.96e-07	6.15e-06	(B) Primary
CHL1-AS1	3p26.3	0 (0.00%)	8 (1.62%)	<-10	2.96e-07	6.15e-06	(B) Primary
CHROMR	2q31.2	0 (0.00%)	8 (1.62%)	<-10	2.96e-07	6.15e-06	(B) Primary
CNTN4-AS2	3p26.3	0 (0.00%)	8 (1.62%)	<-10	2.96e-07	6.15e-06	(B) Primary
CNTNAP2-AS1	7q35	0 (0.00%)	8 (1.62%)	<-10	2.96e-07	6.15e-06	(B) Primary
CTAGE8	7q35	0 (0.00%)	8 (1.62%)	<-10	2.96e-07	6.15e-06	(B) Primary
DPEP2NB	16q22.1	0 (0.00%)	8 (1.62%)	<-10	2.96e-07	6.15e-06	(B) Primary
EPN2-AS1	17p11.2	0 (0.00%)	8 (1.62%)	<-10	2.96e-07	6.15e-06	(B) Primary
EPN2-IT1	17p11.2	0 (0.00%)	8 (1.62%)	<-10	2.96e-07	6.15e-06	(B) Primary
ERICH2-DT		0 (0.00%)	8 (1.62%)	<-10	2.96e-07	6.15e-06	(B) Primary
FLG-AS1	1q21.3	0 (0.00%)	8 (1.62%)	<-10	2.96e-07	6.15e-06	(B) Primary
FMC1-LUC7L2	7q34	0 (0.00%)	8 (1.62%)	<-10	2.96e-07	6.15e-06	(B) Primary
GOLGA6L7	15q13.1	0 (0.00%)	8 (1.62%)	<-10	2.96e-07	6.15e-06	(B) Primary
GOLGA8H	15q13.2	0 (0.00%)	8 (1.62%)	<-10	2.96e-07	6.15e-06	(B) Primary
GOLGA8J	15q13.2	0 (0.00%)	8 (1.62%)	<-10	2.96e-07	6.15e-06	(B) Primary
GOLGA8M	15q13.1	0 (0.00%)	8 (1.62%)	<-10	2.96e-07	6.15e-06	(B) Primary
GOLGA8R	15q13.2	0 (0.00%)	8 (1.62%)	<-10	2.96e-07	6.15e-06	(B) Primary
HCRT	17q21.2	0 (0.00%)	8 (1.62%)	<-10	2.96e-07	6.15e-06	(B) Primary
HERC2P10	15q13.2	0 (0.00%)	8 (1.62%)	<-10	2.96e-07	6.15e-06	(B) Primary
HMMR-AS1	5q34	0 (0.00%)	8 (1.62%)	<-10	2.96e-07	6.15e-06	(B) Primary
HSPB9	17q21.2	0 (0.00%)	8 (1.62%)	<-10	2.96e-07	6.15e-06	(B) Primary
IL12A-AS1	3q25.33	0 (0.00%)	8 (1.62%)	<-10	2.96e-07	6.15e-06	(B) Primary
KCNIP1-OT1	5q35.1	0 (0.00%)	8 (1.62%)	<-10	2.96e-07	6.15e-06	(B) Primary
LINC00367	13q12.11	0 (0.00%)	8 (1.62%)	<-10	2.96e-07	6.15e-06	(B) Primary
LINC00540	13q12.11	0 (0.00%)	8 (1.62%)	<-10	2.96e-07	6.15e-06	(B) Primary
LINC00850	Xq28	0 (0.00%)	8 (1.62%)	<-10	2.96e-07	6.15e-06	(B) Primary
LINC00910	17q21.31	0 (0.00%)	8 (1.62%)	<-10	2.96e-07	6.15e-06	(B) Primary
LINC01100	3q25.33	0 (0.00%)	8 (1.62%)	<-10	2.96e-07	6.15e-06	(B) Primary
LINC01210	3q22.3	0 (0.00%)	8 (1.62%)	<-10	2.96e-07	6.15e-06	(B) Primary
LINC01266	3p26.3	0 (0.00%)	8 (1.62%)	<-10	2.96e-07	6.15e-06	(B) Primary
LINC01358	1p32.1	0 (0.00%)	8 (1.62%)	<-10	2.96e-07	6.15e-06	(B) Primary
LINC01563	17p11.2	0 (0.00%)	8 (1.62%)	<-10	2.96e-07	6.15e-06	(B) Primary
LINC01744	1q42.2	0 (0.00%)	8 (1.62%)	<-10	2.96e-07	6.15e-06	(B) Primary
LINC01910	18q22.2	0 (0.00%)	8 (1.62%)	<-10	2.96e-07	6.15e-06	(B) Primary
LINC01927	18q23	0 (0.00%)	8 (1.62%)	<-10	2.96e-07	6.15e-06	(B) Primary
LINC01947	5q34	0 (0.00%)	8 (1.62%)	<-10	2.96e-07	6.15e-06	(B) Primary
LINC01986	3p26.3	0 (0.00%)	8 (1.62%)	<-10	2.96e-07	6.15e-06	(B) Primary
LINC02016	3q21.3	0 (0.00%)	8 (1.62%)	<-10	2.96e-07	6.15e-06	(B) Primary
LINC02147	5q23.1	0 (0.00%)	8 (1.62%)	<-10	2.96e-07	6.15e-06	(B) Primary
LINC02208	5q23.1	0 (0.00%)	8 (1.62%)	<-10	2.96e-07	6.15e-06	(B) Primary
LINC02215	5q23.1	0 (0.00%)	8 (1.62%)	<-10	2.96e-07	6.15e-06	(B) Primary
LINC02291	14q32.2	0 (0.00%)	8 (1.62%)	<-10	2.96e-07	6.15e-06	(B) Primary
LINC02470	12p13.31	0 (0.00%)	8 (1.62%)	<-10	2.96e-07	6.15e-06	(B) Primary
LINC02587	7p21.2	0 (0.00%)	8 (1.62%)	<-10	2.96e-07	6.15e-06	(B) Primary
LINC02764	11q23.1	0 (0.00%)	8 (1.62%)	<-10	2.96e-07	6.15e-06	(B) Primary
LUCAT1	5q14.3	0 (0.00%)	8 (1.62%)	<-10	2.96e-07	6.15e-06	(B) Primary
MAGEA8-AS1	Xq28	0 (0.00%)	8 (1.62%)	<-10	2.96e-07	6.15e-06	(B) Primary
NALCN-AS1	13q32.3	0 (0.00%)	8 (1.62%)	<-10	2.96e-07	6.15e-06	(B) Primary
NBR2	17q21.31	0 (0.00%)	8 (1.62%)	<-10	2.96e-07	6.15e-06	(B) Primary
NEXN-AS1	1p31.1	0 (0.00%)	8 (1.62%)	<-10	2.96e-07	6.15e-06	(B) Primary
NHS-AS1	Xp22.13	0 (0.00%)	8 (1.62%)	<-10	2.96e-07	6.15e-06	(B) Primary
NUP133-DT		0 (0.00%)	8 (1.62%)	<-10	2.96e-07	6.15e-06	(B) Primary
PRSS59P		0 (0.00%)	8 (1.62%)	<-10	2.96e-07	6.15e-06	(B) Primary
PTPRD-DT		0 (0.00%)	8 (1.62%)	<-10	2.96e-07	6.15e-06	(B) Primary
PVRIG2P	7q22.1	0 (0.00%)	8 (1.62%)	<-10	2.96e-07	6.15e-06	(B) Primary
RAMP2-AS1	17q21.2	0 (0.00%)	8 (1.62%)	<-10	2.96e-07	6.15e-06	(B) Primary
RNU6-57P	13q14.11	0 (0.00%)	8 (1.62%)	<-10	2.96e-07	6.15e-06	(B) Primary
RPL27	17q21.31	0 (0.00%)	8 (1.62%)	<-10	2.96e-07	6.15e-06	(B) Primary
SAMMSON	3p13	0 (0.00%)	8 (1.62%)	<-10	2.96e-07	6.15e-06	(B) Primary
SCN1A-AS1	2q24.3	0 (0.00%)	8 (1.62%)	<-10	2.96e-07	6.15e-06	(B) Primary
SERPINA13P	14q32.13	0 (0.00%)	8 (1.62%)	<-10	2.96e-07	6.15e-06	(B) Primary
SERPINA2	14q32.13	0 (0.00%)	8 (1.62%)	<-10	2.96e-07	6.15e-06	(B) Primary
SLC25A48-AS1	5q31.1	0 (0.00%)	8 (1.62%)	<-10	2.96e-07	6.15e-06	(B) Primary
SRGAP3-AS3	3p25.3	0 (0.00%)	8 (1.62%)	<-10	2.96e-07	6.15e-06	(B) Primary
STAG3L5P	7q22.1	0 (0.00%)	8 (1.62%)	<-10	2.96e-07	6.15e-06	(B) Primary
STAG3L5P-PVRIG2P-PILRB	7q22.1	0 (0.00%)	8 (1.62%)	<-10	2.96e-07	6.15e-06	(B) Primary
SWINGN		0 (0.00%)	8 (1.62%)	<-10	2.96e-07	6.15e-06	(B) Primary
TENM2-AS1		0 (0.00%)	8 (1.62%)	<-10	2.96e-07	6.15e-06	(B) Primary
TMEM132D-AS1	12q24.33	0 (0.00%)	8 (1.62%)	<-10	2.96e-07	6.15e-06	(B) Primary
TMEM132D-AS2	12q24.33	0 (0.00%)	8 (1.62%)	<-10	2.96e-07	6.15e-06	(B) Primary
TRIM67-AS1	1q42.2	0 (0.00%)	8 (1.62%)	<-10	2.96e-07	6.15e-06	(B) Primary
TTC21B-AS1	2q24.3	0 (0.00%)	8 (1.62%)	<-10	2.96e-07	6.15e-06	(B) Primary
VPS25	17q21.31	0 (0.00%)	8 (1.62%)	<-10	2.96e-07	6.15e-06	(B) Primary
ZASP	7q22.1	0 (0.00%)	8 (1.62%)	<-10	2.96e-07	6.15e-06	(B) Primary
ZNF407-AS1	18q22.3	0 (0.00%)	8 (1.62%)	<-10	2.96e-07	6.15e-06	(B) Primary
ZNRF3-AS1	22q12.1	0 (0.00%)	8 (1.62%)	<-10	2.96e-07	6.15e-06	(B) Primary
P2RY4	Xq13.1	23 (4.33%)	7 (0.60%)	2.86	2.97e-07	6.16e-06	(A) Metastasis
BRSK2	11p15.5	17 (3.52%)	78 (11.47%)	-1.7	2.98e-07	6.17e-06	(B) Primary
CDKN1B	12p13.1	182 (6.69%)	153 (3.91%)	0.78	2.98e-07	6.17e-06	(A) Metastasis
TMEM65	8q24.13	66 (12.43%)	61 (5.20%)	1.26	3.07e-07	6.35e-06	(A) Metastasis
TLE1	9q21.32	16 (3.31%)	20 (0.51%)	2.7	3.14e-07	6.5e-06	(A) Metastasis
TIMP3	22q12.3	7 (1.32%)	0 (0.00%)	>10	3.27e-07	6.76e-06	(A) Metastasis
KIF4B	5q33.2	24 (4.52%)	8 (0.68%)	2.73	3.29e-07	6.78e-06	(A) Metastasis
USP46	4q12	24 (4.52%)	8 (0.68%)	2.73	3.29e-07	6.78e-06	(A) Metastasis
TRIM55	8q13.1	59 (11.11%)	51 (4.34%)	1.35	3.37e-07	6.94e-06	(A) Metastasis
FIP1L1	4q12	25 (4.71%)	9 (0.77%)	2.62	3.51e-07	7.21e-06	(A) Metastasis
LYZL2	10p11.23	25 (4.71%)	9 (0.77%)	2.62	3.51e-07	7.21e-06	(A) Metastasis
TNNI1	1q32.1	25 (4.71%)	9 (0.77%)	2.62	3.51e-07	7.21e-06	(A) Metastasis
TG	8q24.22	93 (17.51%)	105 (8.86%)	0.98	3.53e-07	7.23e-06	(A) Metastasis
AARD	8q24.11	61 (11.49%)	54 (4.60%)	1.32	3.53e-07	7.23e-06	(A) Metastasis
ELF4	Xq26.1	11 (5.56%)	4 (0.34%)	4.03	3.54e-07	7.23e-06	(A) Metastasis
GPR101	Xq26.3	11 (5.56%)	4 (0.34%)	4.03	3.54e-07	7.23e-06	(A) Metastasis
RBMX	Xq26.3	11 (5.56%)	4 (0.34%)	4.03	3.54e-07	7.23e-06	(A) Metastasis
RENBP	Xq28	15 (7.58%)	2 (0.40%)	4.23	3.62e-07	7.39e-06	(A) Metastasis
GRK7	3q23	37 (6.97%)	22 (1.87%)	1.89	3.63e-07	7.4e-06	(A) Metastasis
RASA2	3q23	37 (6.97%)	22 (1.87%)	1.89	3.63e-07	7.4e-06	(A) Metastasis
CISD1	10q21.1	26 (4.90%)	10 (0.85%)	2.52	3.64e-07	7.41e-06	(A) Metastasis
FRMPD4	Xp22.2	26 (4.90%)	10 (0.85%)	2.52	3.64e-07	7.41e-06	(A) Metastasis
RNPEP	1q32.1	27 (5.08%)	11 (0.94%)	2.44	3.68e-07	7.47e-06	(A) Metastasis
ZNF438	10p11.23	27 (5.08%)	11 (0.94%)	2.44	3.68e-07	7.47e-06	(A) Metastasis
CCSER2	10q23.1	45 (8.47%)	32 (2.73%)	1.64	3.69e-07	7.48e-06	(A) Metastasis
NDST2	10q22.2	51 (9.60%)	40 (3.41%)	1.5	3.69e-07	7.49e-06	(A) Metastasis
CPNE3	8q21.3	65 (12.24%)	60 (5.11%)	1.26	3.71e-07	7.52e-06	(A) Metastasis
CIBAR1	8q22.1	67 (12.62%)	63 (5.37%)	1.23	3.73e-07	7.55e-06	(A) Metastasis
TRIQK	8q22.1	67 (12.62%)	63 (5.37%)	1.23	3.73e-07	7.55e-06	(A) Metastasis
ANXA9	1q21.3	41 (7.72%)	27 (2.30%)	1.75	3.89e-07	7.85e-06	(A) Metastasis
PIK3R4	3q22.1	41 (7.72%)	27 (2.30%)	1.75	3.89e-07	7.85e-06	(A) Metastasis
PRR23B	3q23	41 (7.72%)	27 (2.30%)	1.75	3.89e-07	7.85e-06	(A) Metastasis
SPTBN2	11q13.2	41 (7.72%)	27 (2.30%)	1.75	3.89e-07	7.85e-06	(A) Metastasis
RBP1	3q23	36 (6.78%)	21 (1.79%)	1.92	4.08e-07	8.21e-06	(A) Metastasis
SLC25A36	3q23	36 (6.78%)	21 (1.79%)	1.92	4.08e-07	8.21e-06	(A) Metastasis
LYN	8q12.1	94 (4.84%)	67 (2.22%)	1.13	4.09e-07	8.23e-06	(A) Metastasis
NUB1	7q36.1	29 (5.46%)	28 (1.40%)	1.96	4.17e-07	8.38e-06	(A) Metastasis
IQSEC3	12p13.33	19 (3.58%)	4 (0.34%)	3.39	4.29e-07	8.61e-06	(A) Metastasis
YY2	Xp22.12	19 (3.58%)	4 (0.34%)	3.39	4.29e-07	8.61e-06	(A) Metastasis
CHCHD1	10q22.2	44 (8.29%)	31 (2.64%)	1.65	4.31e-07	8.63e-06	(A) Metastasis
LRIT1	10q23.1	44 (8.29%)	31 (2.64%)	1.65	4.31e-07	8.63e-06	(A) Metastasis
CATSPER1	11q13.1	32 (6.63%)	19 (1.62%)	2.03	4.32e-07	8.64e-06	(A) Metastasis
LMBR1	7q36.3	32 (6.63%)	19 (1.62%)	2.03	4.32e-07	8.64e-06	(A) Metastasis
CPA6	8q13.2	62 (11.68%)	56 (4.77%)	1.29	4.4e-07	8.77e-06	(A) Metastasis
SNTB1	8q24.12	62 (11.68%)	56 (4.77%)	1.29	4.4e-07	8.77e-06	(A) Metastasis
ZHX1-C8ORF76	8q24.13	64 (12.05%)	59 (5.03%)	1.26	4.48e-07	8.94e-06	(A) Metastasis
TMEM67	8q22.1	68 (12.81%)	65 (5.54%)	1.21	4.5e-07	8.96e-06	(A) Metastasis
CNGB3	8q21.3	66 (12.43%)	62 (5.28%)	1.23	4.52e-07	8.99e-06	(A) Metastasis
RNF7	3q23	35 (6.59%)	20 (1.70%)	1.95	4.57e-07	9.08e-06	(A) Metastasis
DDX50	10q22.1	42 (7.91%)	29 (2.45%)	1.69	4.82e-07	9.57e-06	(A) Metastasis
GAL	11q13.2	43 (8.10%)	30 (2.56%)	1.66	5.03e-07	9.98e-06	(A) Metastasis
MAGEA1	Xq28	12 (6.06%)	6 (0.51%)	3.57	5.04e-07	9.99e-06	(A) Metastasis
NSUN5P1	7q11.23	31 (6.42%)	18 (1.53%)	2.07	5.06e-07	1e-05	(A) Metastasis
STAG3L1	7q11.23	31 (6.42%)	18 (1.53%)	2.07	5.06e-07	1e-05	(A) Metastasis
RRS1	8q13.1	59 (11.11%)	52 (4.43%)	1.33	5.12e-07	1.01e-05	(A) Metastasis
REEP3	10q21.3	39 (7.34%)	25 (2.13%)	1.79	5.15e-07	1.02e-05	(A) Metastasis
MROH2B	5p13.1	20 (4.14%)	6 (0.51%)	3.02	5.18e-07	1.02e-05	(A) Metastasis
PHEX	Xp22.11	16 (8.08%)	3 (0.61%)	3.73	5.2e-07	1.03e-05	(A) Metastasis
TRO	Xp11.21	16 (3.01%)	2 (0.17%)	4.14	5.21e-07	1.03e-05	(A) Metastasis
SEC24C	10q22.2	46 (8.66%)	34 (2.90%)	1.58	5.26e-07	1.04e-05	(A) Metastasis
PTPRVP	1q32.1	24 (4.97%)	10 (0.85%)	2.54	5.29e-07	1.04e-05	(A) Metastasis
UBAP1	9p13.3	24 (4.97%)	10 (0.85%)	2.54	5.29e-07	1.04e-05	(A) Metastasis
RBM12	20q11.22	0 (0.00%)	12 (1.02%)	<-10	5.41e-07	1.06e-05	(B) Primary
SNORD97	11p15.3	0 (0.00%)	12 (1.02%)	<-10	5.41e-07	1.06e-05	(B) Primary
TRIB1	8q24.13	67 (12.62%)	64 (5.45%)	1.21	5.45e-07	1.07e-05	(A) Metastasis
FBXO32	8q24.13	65 (12.24%)	61 (5.20%)	1.24	5.46e-07	1.07e-05	(A) Metastasis
WWP1	8q21.3	65 (12.24%)	61 (5.20%)	1.24	5.46e-07	1.07e-05	(A) Metastasis
TMEM187	Xq28	20 (3.77%)	5 (0.43%)	3.14	5.55e-07	1.09e-05	(A) Metastasis
ENHO	9p13.3	22 (4.55%)	8 (0.68%)	2.74	5.6e-07	1.09e-05	(A) Metastasis
TRIM74	7q11.23	33 (6.21%)	18 (1.53%)	2.02	5.62e-07	1.1e-05	(A) Metastasis
AIFM1	Xq26.1	10 (5.05%)	3 (0.25%)	4.32	5.7e-07	1.11e-05	(A) Metastasis
HORMAD1	1q21.3	42 (7.91%)	29 (2.47%)	1.68	5.86e-07	1.14e-05	(A) Metastasis
MRPL21	11q13.3	42 (7.91%)	29 (2.47%)	1.68	5.86e-07	1.14e-05	(A) Metastasis
NMNAT3	3q23	38 (7.16%)	24 (2.04%)	1.81	5.9e-07	1.15e-05	(A) Metastasis
CT45A5	Xq26.3	10 (5.05%)	3 (0.26%)	4.3	6.15e-07	1.19e-05	(A) Metastasis
GPC3	Xq26.2	10 (5.05%)	3 (0.26%)	4.3	6.15e-07	1.19e-05	(A) Metastasis
TRIM73	7q11.23	32 (6.03%)	17 (1.45%)	2.06	6.16e-07	1.2e-05	(A) Metastasis
CARD11	7p22.2	83 (3.05%)	51 (1.30%)	1.23	6.34e-07	1.23e-05	(A) Metastasis
SLC30A8	8q24.11	60 (11.30%)	54 (4.60%)	1.3	6.39e-07	1.24e-05	(A) Metastasis
MOSPD2	Xp22.2	17 (8.59%)	4 (0.81%)	3.41	6.46e-07	1.25e-05	(A) Metastasis
RPRD2	1q21.2	53 (9.98%)	44 (3.75%)	1.41	6.5e-07	1.26e-05	(A) Metastasis
ABRA	8q23.1	68 (12.81%)	66 (5.62%)	1.19	6.51e-07	1.26e-05	(A) Metastasis
SLC7A13	8q21.3	62 (11.68%)	57 (4.86%)	1.27	6.54e-07	1.26e-05	(A) Metastasis
BMPR1A	10q23.2	99 (3.64%)	67 (1.71%)	1.09	6.57e-07	1.27e-05	(A) Metastasis
RALYL	8q21.2	77 (14.50%)	80 (6.81%)	1.09	6.58e-07	1.27e-05	(A) Metastasis
ANGPT1	8q23.1	66 (12.43%)	63 (5.37%)	1.21	6.59e-07	1.27e-05	(A) Metastasis
FAM83A	8q24.13	64 (12.05%)	60 (5.11%)	1.24	6.6e-07	1.27e-05	(A) Metastasis
TMEM64	8q21.3	64 (12.05%)	60 (5.11%)	1.24	6.6e-07	1.27e-05	(A) Metastasis
LMBRD2	5p13.2	21 (3.95%)	6 (0.51%)	2.95	6.66e-07	1.28e-05	(A) Metastasis
ANKRD17	4q13.3	37 (6.97%)	23 (1.96%)	1.83	6.73e-07	1.29e-05	(A) Metastasis
ARHGAP22	10q11.22-q11.23	37 (6.97%)	23 (1.96%)	1.83	6.73e-07	1.29e-05	(A) Metastasis
CHST2	3q24	37 (6.97%)	23 (1.96%)	1.83	6.73e-07	1.29e-05	(A) Metastasis
PLS1	3q23	37 (6.97%)	23 (1.96%)	1.83	6.73e-07	1.29e-05	(A) Metastasis
GABPB2	1q21.3	41 (7.72%)	28 (2.39%)	1.69	6.81e-07	1.3e-05	(A) Metastasis
MRGPRD	11q13.3	41 (7.72%)	28 (2.39%)	1.69	6.81e-07	1.3e-05	(A) Metastasis
PIP5K1A	1q21.3	41 (7.72%)	28 (2.39%)	1.69	6.81e-07	1.3e-05	(A) Metastasis
RS1	Xp22.13	22 (11.11%)	9 (1.82%)	2.61	6.83e-07	1.3e-05	(A) Metastasis
RNF38	9p13.2	28 (5.27%)	13 (1.10%)	2.27	7.04e-07	1.34e-05	(A) Metastasis
BPESC1	3q23	36 (7.45%)	25 (2.13%)	1.81	7.1e-07	1.35e-05	(A) Metastasis
PISRT1	3q23	36 (7.45%)	25 (2.13%)	1.81	7.1e-07	1.35e-05	(A) Metastasis
CFAP206	6q15	23 (4.33%)	133 (11.33%)	-1.39	7.16e-07	1.36e-05	(B) Primary
CALM2	2p21	23 (4.33%)	8 (0.68%)	2.68	7.2e-07	1.37e-05	(A) Metastasis
OTUD6A	Xq13.1	31 (5.84%)	3 (0.61%)	3.27	7.3e-07	1.39e-05	(A) Metastasis
JMJD1C	10q21.3	51 (9.60%)	42 (3.54%)	1.44	7.44e-07	1.41e-05	(A) Metastasis
WWC3	Xp22.2	22 (4.14%)	7 (0.60%)	2.8	7.55e-07	1.43e-05	(A) Metastasis
GK5	3q23	36 (6.78%)	22 (1.87%)	1.86	7.64e-07	1.45e-05	(A) Metastasis
NBDY	Xp11.21	11 (7.33%)	1 (0.20%)	5.18	7.85e-07	1.49e-05	(A) Metastasis
UQCRBP1	Xp11.21	11 (7.33%)	1 (0.20%)	5.18	7.85e-07	1.49e-05	(A) Metastasis
NSMCE2	8q24.13	67 (12.62%)	65 (5.54%)	1.19	7.88e-07	1.49e-05	(A) Metastasis
MAL2	8q24.12	61 (11.49%)	56 (4.77%)	1.27	7.89e-07	1.49e-05	(A) Metastasis
ACAD9	3q21.3	40 (7.53%)	27 (2.30%)	1.71	7.9e-07	1.49e-05	(A) Metastasis
CCNC	6q16.2	19 (3.58%)	119 (10.14%)	-1.5	8.09e-07	1.52e-05	(B) Primary
FAXC	6q16.2	19 (3.58%)	119 (10.14%)	-1.5	8.09e-07	1.52e-05	(B) Primary
USP45	6q16.2	19 (3.58%)	119 (10.14%)	-1.5	8.09e-07	1.52e-05	(B) Primary
CPLANE1	5p13.2	28 (5.27%)	13 (1.11%)	2.25	8.16e-07	1.53e-05	(A) Metastasis
PTPN7	1q32.1	28 (5.27%)	13 (1.11%)	2.25	8.16e-07	1.53e-05	(A) Metastasis
TFAP2A	6p24.3	23 (4.33%)	8 (0.68%)	2.67	8.19e-07	1.54e-05	(A) Metastasis
TMEM14B	6p24.2	23 (4.33%)	8 (0.68%)	2.67	8.19e-07	1.54e-05	(A) Metastasis
IGSF10	3q25.1	49 (9.23%)	39 (3.32%)	1.47	8.36e-07	1.57e-05	(A) Metastasis
DUSP9	Xq28	17 (3.20%)	3 (0.26%)	3.65	8.42e-07	1.58e-05	(A) Metastasis
BDP1	5q13.2	32 (1.51%)	52 (4.39%)	-1.53	8.44e-07	1.58e-05	(B) Primary
C1ORF116	1q32.1	27 (5.08%)	12 (1.02%)	2.31	8.49e-07	1.59e-05	(A) Metastasis
PHKA2	Xp22.13	27 (5.08%)	12 (1.02%)	2.31	8.49e-07	1.59e-05	(A) Metastasis
MINDY1	1q21.3	43 (8.10%)	31 (2.64%)	1.62	8.53e-07	1.59e-05	(A) Metastasis
VDAC2	10q22.2	43 (8.10%)	31 (2.64%)	1.62	8.53e-07	1.59e-05	(A) Metastasis
HERC1	15q22.31	24 (4.52%)	9 (0.77%)	2.56	8.58e-07	1.6e-05	(A) Metastasis
MAP3K8	10p11.23	24 (4.52%)	9 (0.77%)	2.56	8.58e-07	1.6e-05	(A) Metastasis
U2SURP	3q23	35 (6.59%)	21 (1.79%)	1.88	8.65e-07	1.61e-05	(A) Metastasis
RHOBTB1	10q21.2	46 (8.66%)	35 (2.98%)	1.54	8.65e-07	1.61e-05	(A) Metastasis
FCAMR	1q32.1	26 (4.90%)	11 (0.94%)	2.39	8.7e-07	1.61e-05	(A) Metastasis
PKP1	1q32.1	26 (4.90%)	11 (0.94%)	2.39	8.7e-07	1.61e-05	(A) Metastasis
RBBP7	Xp22.2	25 (4.71%)	10 (0.85%)	2.47	8.74e-07	1.62e-05	(A) Metastasis
SLC1A3	5p13.2	25 (4.71%)	10 (0.85%)	2.47	8.74e-07	1.62e-05	(A) Metastasis
COPB2	3q23	39 (7.34%)	26 (2.21%)	1.73	9.14e-07	1.69e-05	(A) Metastasis
UNC13B	9p13.3	33 (6.21%)	19 (1.60%)	1.95	9.27e-07	1.71e-05	(A) Metastasis
CRH	8q13.1	58 (10.92%)	52 (4.43%)	1.3	9.27e-07	1.71e-05	(A) Metastasis
BHLHE22	8q12.3	51 (9.60%)	42 (3.58%)	1.42	9.28e-07	1.71e-05	(A) Metastasis
EFR3A	8q24.22	62 (11.68%)	58 (4.94%)	1.24	9.63e-07	1.78e-05	(A) Metastasis
DCSTAMP	8q22.3	64 (12.05%)	61 (5.20%)	1.21	9.63e-07	1.78e-05	(A) Metastasis
SIRT1	10q21.3	41 (7.72%)	29 (2.45%)	1.66	9.67e-07	1.78e-05	(A) Metastasis
ATP1B3	3q23	34 (6.40%)	20 (1.70%)	1.91	9.74e-07	1.79e-05	(A) Metastasis
SEPTIN6	Xq24	9 (4.55%)	2 (0.17%)	4.74	9.77e-07	1.8e-05	(A) Metastasis
TRIM16	17p12	9 (4.55%)	2 (0.17%)	4.74	9.77e-07	1.8e-05	(A) Metastasis
OTUD5	Xp11.23	11 (5.56%)	5 (0.43%)	3.71	9.89e-07	1.82e-05	(A) Metastasis
BNIPL	1q21.3	42 (7.91%)	30 (2.56%)	1.63	9.99e-07	1.83e-05	(A) Metastasis
CTSS	1q21.3	42 (7.91%)	30 (2.56%)	1.63	9.99e-07	1.83e-05	(A) Metastasis
FSIP2	2q32.1	42 (7.91%)	30 (2.56%)	1.63	9.99e-07	1.83e-05	(A) Metastasis
IGHMBP2	11q13.3	42 (7.91%)	30 (2.56%)	1.63	9.99e-07	1.83e-05	(A) Metastasis
FANCA	16q24.3	104 (3.82%)	73 (1.86%)	1.04	1.03e-06	1.89e-05	(A) Metastasis
IGF2R	6q25.3	32 (6.03%)	18 (1.52%)	1.99	1.04e-06	1.89e-05	(A) Metastasis
COQ3	6q16.2	19 (3.58%)	118 (10.05%)	-1.49	1.04e-06	1.9e-05	(B) Primary
CLRN1	3q25.1	38 (7.16%)	25 (2.13%)	1.75	1.06e-06	1.92e-05	(A) Metastasis
FAIM	3q22.3	38 (7.16%)	25 (2.13%)	1.75	1.06e-06	1.92e-05	(A) Metastasis
RABIF	1q32.1	28 (5.27%)	5 (0.74%)	2.84	1.06e-06	1.93e-05	(A) Metastasis
RPS6KB2	11q13.2	95 (3.49%)	64 (1.63%)	1.1	1.07e-06	1.96e-05	(A) Metastasis
KRTAP10-1	21q22.3	12 (6.06%)	7 (0.59%)	3.36	1.09e-06	1.99e-05	(A) Metastasis
C6	5p13.1	25 (5.18%)	12 (1.02%)	2.34	1.12e-06	2.04e-05	(A) Metastasis
ADK	10q22.2	46 (8.66%)	36 (3.04%)	1.51	1.14e-06	2.07e-05	(A) Metastasis
VCL	10q22.2	46 (8.66%)	36 (3.04%)	1.51	1.14e-06	2.07e-05	(A) Metastasis
EXT1	8q24.11	61 (11.49%)	57 (4.86%)	1.24	1.16e-06	2.11e-05	(A) Metastasis
COPS5	8q13.1	63 (11.86%)	60 (5.11%)	1.22	1.16e-06	2.11e-05	(A) Metastasis
KMT5B	11q13.2	41 (7.72%)	29 (2.47%)	1.64	1.17e-06	2.11e-05	(A) Metastasis
TRIM42	3q23	41 (7.72%)	29 (2.47%)	1.64	1.17e-06	2.11e-05	(A) Metastasis
XRN1	3q23	41 (7.72%)	29 (2.47%)	1.64	1.17e-06	2.11e-05	(A) Metastasis
ASXL3	18q12.1	18 (3.39%)	4 (0.34%)	3.31	1.17e-06	2.11e-05	(A) Metastasis
SAMD8	10q22.2	43 (8.10%)	32 (2.70%)	1.58	1.17e-06	2.11e-05	(A) Metastasis
ARR3	Xq13.1	14 (7.07%)	2 (0.40%)	4.13	1.18e-06	2.11e-05	(A) Metastasis
GDPD2	Xq13.1	14 (7.07%)	2 (0.40%)	4.13	1.18e-06	2.11e-05	(A) Metastasis
GJB1	Xq13.1	14 (7.07%)	2 (0.40%)	4.13	1.18e-06	2.11e-05	(A) Metastasis
IKBKG	Xq28	14 (7.07%)	2 (0.40%)	4.13	1.18e-06	2.11e-05	(A) Metastasis
IL2RG	Xq13.1	14 (7.07%)	2 (0.40%)	4.13	1.18e-06	2.11e-05	(A) Metastasis
RAB41	Xq13.1	14 (7.07%)	2 (0.40%)	4.13	1.18e-06	2.11e-05	(A) Metastasis
SNX12	Xq13.1	14 (7.07%)	2 (0.40%)	4.13	1.18e-06	2.11e-05	(A) Metastasis
MNX1	7q36.3	32 (6.03%)	18 (1.53%)	1.97	1.22e-06	2.18e-05	(A) Metastasis
MAOB	Xp11.3	13 (6.57%)	9 (0.77%)	3.1	1.23e-06	2.2e-05	(A) Metastasis
MAP3K7	6q15	24 (4.52%)	134 (11.41%)	-1.34	1.24e-06	2.22e-05	(B) Primary
PRKDC	8q11.21	61 (11.49%)	58 (4.89%)	1.23	1.33e-06	2.38e-05	(A) Metastasis
CCL27	9p13.3	23 (4.76%)	10 (0.85%)	2.48	1.33e-06	2.38e-05	(A) Metastasis
NUDT2	9p13.3	23 (4.76%)	10 (0.85%)	2.48	1.33e-06	2.38e-05	(A) Metastasis
WASHC5	8q24.13	68 (12.81%)	68 (5.79%)	1.14	1.33e-06	2.38e-05	(A) Metastasis
PNISR	6q16.2	19 (3.58%)	117 (9.97%)	-1.48	1.34e-06	2.38e-05	(B) Primary
PRDM13	6q16.2	19 (3.58%)	117 (9.97%)	-1.48	1.34e-06	2.38e-05	(B) Primary
KMT2C	7q36.1	270 (9.92%)	262 (6.69%)	0.57	1.34e-06	2.38e-05	(A) Metastasis
CDH9	5p14.1	31 (5.84%)	17 (1.45%)	2.01	1.35e-06	2.39e-05	(A) Metastasis
SPATA18	4q12	31 (5.84%)	17 (1.45%)	2.01	1.35e-06	2.39e-05	(A) Metastasis
C1ORF56	1q21.3	40 (7.53%)	28 (2.39%)	1.66	1.36e-06	2.42e-05	(A) Metastasis
DSP	6p24.3	40 (7.53%)	28 (2.39%)	1.66	1.36e-06	2.42e-05	(A) Metastasis
P2RY14	3q25.1	40 (7.53%)	28 (2.39%)	1.66	1.36e-06	2.42e-05	(A) Metastasis
AADACL2	3q25.1	36 (6.78%)	23 (1.96%)	1.79	1.39e-06	2.47e-05	(A) Metastasis
TRH	3q22.1	36 (6.78%)	23 (1.96%)	1.79	1.39e-06	2.47e-05	(A) Metastasis
DPYS	8q22.3	64 (12.05%)	62 (5.28%)	1.19	1.39e-06	2.47e-05	(A) Metastasis
LRMDA	10q22.2-q22.3	46 (8.66%)	36 (3.07%)	1.5	1.4e-06	2.48e-05	(A) Metastasis
TMEM26	10q21.2	46 (8.66%)	36 (3.07%)	1.5	1.4e-06	2.48e-05	(A) Metastasis
UTP23	8q24.11	60 (11.30%)	56 (4.77%)	1.24	1.4e-06	2.48e-05	(A) Metastasis
CAB39	2q37.1	19 (3.93%)	6 (0.51%)	2.94	1.41e-06	2.49e-05	(A) Metastasis
ITM2C	2q37.1	19 (3.93%)	6 (0.51%)	2.94	1.41e-06	2.49e-05	(A) Metastasis
PTGER4	5p13.1	19 (3.93%)	6 (0.51%)	2.94	1.41e-06	2.49e-05	(A) Metastasis
S100G	Xp22.2	23 (11.62%)	11 (2.23%)	2.38	1.43e-06	2.52e-05	(A) Metastasis
FAT1	4q35.2	106 (3.90%)	76 (1.94%)	1.01	1.47e-06	2.57e-05	(A) Metastasis
DAB2	5p13.1	19 (3.58%)	5 (0.43%)	3.07	1.47e-06	2.57e-05	(A) Metastasis
HCFC1	Xq28	19 (3.58%)	5 (0.43%)	3.07	1.47e-06	2.57e-05	(A) Metastasis
MRPS18A	6p21.1	19 (3.58%)	5 (0.43%)	3.07	1.47e-06	2.57e-05	(A) Metastasis
PLEKHB1	11q13.4	19 (3.58%)	5 (0.43%)	3.07	1.47e-06	2.57e-05	(A) Metastasis
SRSF12	6q15	23 (4.33%)	130 (11.07%)	-1.35	1.47e-06	2.58e-05	(B) Primary
SLC45A4	8q24.3	78 (14.69%)	85 (7.17%)	1.03	1.48e-06	2.58e-05	(A) Metastasis
CLRN1-AS1	3q25.1	35 (7.25%)	25 (2.13%)	1.77	1.51e-06	2.64e-05	(A) Metastasis
APEX2	Xp11.21	15 (2.82%)	2 (0.17%)	4.05	1.52e-06	2.66e-05	(A) Metastasis
CNTRL	9q33.2	16 (3.01%)	21 (0.54%)	2.49	1.58e-06	2.76e-05	(A) Metastasis
SIAH2	3q25.1	39 (7.34%)	27 (2.30%)	1.68	1.59e-06	2.77e-05	(A) Metastasis
HHLA1	8q24.22	62 (11.68%)	60 (5.06%)	1.21	1.59e-06	2.77e-05	(A) Metastasis
OGDHL	10q11.23	35 (6.59%)	22 (1.87%)	1.81	1.59e-06	2.77e-05	(A) Metastasis
PLCL2	3p24.3	29 (5.46%)	15 (1.28%)	2.1	1.61e-06	2.81e-05	(A) Metastasis
MGME1	20p11.23	3 (6.25%)	0 (0.00%)	>10	1.65e-06	2.87e-05	(A) Metastasis
ZHX2	8q24.13	65 (12.24%)	64 (5.45%)	1.17	1.66e-06	2.88e-05	(A) Metastasis
KAT6B	10q22.2	49 (9.23%)	41 (3.46%)	1.42	1.67e-06	2.9e-05	(A) Metastasis
RANGAP1	22q13.2	6 (1.24%)	0 (0.00%)	>10	1.67e-06	2.91e-05	(A) Metastasis
TIMM44	19p13.2	6 (1.24%)	0 (0.00%)	>10	1.67e-06	2.91e-05	(A) Metastasis
C8ORF44-SGK3	8q13.1	61 (11.49%)	58 (4.94%)	1.22	1.7e-06	2.94e-05	(A) Metastasis
DSCC1	8q24.12	61 (11.49%)	58 (4.94%)	1.22	1.7e-06	2.94e-05	(A) Metastasis
CLINT1	5q33.3	20 (3.77%)	6 (0.51%)	2.88	1.71e-06	2.96e-05	(A) Metastasis
ERVFRD-1	6p24.2	20 (3.77%)	6 (0.51%)	2.88	1.71e-06	2.96e-05	(A) Metastasis
KIF24	9p13.3	28 (5.27%)	14 (1.19%)	2.14	1.74e-06	3.01e-05	(A) Metastasis
UBE2D1	10q21.1	28 (5.27%)	14 (1.19%)	2.14	1.74e-06	3.01e-05	(A) Metastasis
FAM237A	2q33.3	4 (2.67%)	0 (0.00%)	>10	1.76e-06	3.03e-05	(A) Metastasis
MGAT4EP	1q32.1	4 (2.67%)	0 (0.00%)	>10	1.76e-06	3.03e-05	(A) Metastasis
USP27X-DT	Xp11.23	4 (2.67%)	0 (0.00%)	>10	1.76e-06	3.03e-05	(A) Metastasis
CDK4	12q14.1	45 (1.65%)	19 (0.48%)	1.77	1.79e-06	3.07e-05	(A) Metastasis
ATF7IP2	16p13.2-p13.13	0 (0.00%)	11 (0.94%)	<-10	1.81e-06	3.1e-05	(B) Primary
MYG1	12q13.13	0 (0.00%)	11 (0.94%)	<-10	1.81e-06	3.1e-05	(B) Primary
SOAT2	12q13.13	0 (0.00%)	11 (0.94%)	<-10	1.81e-06	3.1e-05	(B) Primary
TMEM106A	17q21.31	0 (0.00%)	11 (0.94%)	<-10	1.81e-06	3.1e-05	(B) Primary
CD74	5q33.1	24 (4.52%)	10 (0.84%)	2.42	1.82e-06	3.1e-05	(A) Metastasis
LRRC4C	11p12	15 (0.72%)	34 (2.90%)	-2.01	1.84e-06	3.1e-05	(B) Primary
MLLT11	1q21.3	38 (7.16%)	26 (2.21%)	1.69	1.85e-06	3.1e-05	(A) Metastasis
CDX1	5q32	27 (5.08%)	13 (1.11%)	2.2	1.86e-06	3.1e-05	(A) Metastasis
TRAF3IP1	2q37.3	27 (5.08%)	13 (1.11%)	2.2	1.86e-06	3.1e-05	(A) Metastasis
PM20D2	6q15	23 (4.33%)	129 (10.99%)	-1.34	1.87e-06	3.1e-05	(B) Primary
PIK3C2G	12p12.3	73 (2.68%)	44 (1.12%)	1.26	1.88e-06	3.1e-05	(A) Metastasis
BRS3	Xq26.3	10 (5.05%)	4 (0.34%)	3.89	1.88e-06	3.1e-05	(A) Metastasis
REXO1L2P	8q21.2	54 (11.18%)	54 (4.60%)	1.28	1.89e-06	3.1e-05	(A) Metastasis
CDK12	17q12	195 (7.17%)	175 (4.47%)	0.68	1.9e-06	3.1e-05	(A) Metastasis
ARFGEF1	8q13.2	66 (12.43%)	66 (5.62%)	1.14	1.95e-06	3.1e-05	(A) Metastasis
LRATD2	8q24.21	66 (12.43%)	66 (5.62%)	1.14	1.95e-06	3.1e-05	(A) Metastasis
ACTR3-AS1	2q14.1	0 (0.00%)	7 (1.42%)	<-10	1.95e-06	3.1e-05	(B) Primary
AOC4P	17q21.31	0 (0.00%)	7 (1.42%)	<-10	1.95e-06	3.1e-05	(B) Primary
AREL1	14q24.3	0 (0.00%)	7 (1.42%)	<-10	1.95e-06	3.1e-05	(B) Primary
ATP8B1-AS1		0 (0.00%)	7 (1.42%)	<-10	1.95e-06	3.1e-05	(B) Primary
BMP7-AS1	20q13.31	0 (0.00%)	7 (1.42%)	<-10	1.95e-06	3.1e-05	(B) Primary
BPIFB3	20q11.21	0 (0.00%)	7 (1.42%)	<-10	1.95e-06	3.1e-05	(B) Primary
BTNL10P		0 (0.00%)	7 (1.42%)	<-10	1.95e-06	3.1e-05	(B) Primary
C14ORF132	14q32.2	0 (0.00%)	7 (1.42%)	<-10	1.95e-06	3.1e-05	(B) Primary
CCDC85C	14q32.2	0 (0.00%)	7 (1.42%)	<-10	1.95e-06	3.1e-05	(B) Primary
CERNA1	15q21.2	0 (0.00%)	7 (1.42%)	<-10	1.95e-06	3.1e-05	(B) Primary
CFAP58-DT	10q25.1	0 (0.00%)	7 (1.42%)	<-10	1.95e-06	3.1e-05	(B) Primary
CHRM3-AS1	1q43	0 (0.00%)	7 (1.42%)	<-10	1.95e-06	3.1e-05	(B) Primary
CHRM3-AS2	1q43	0 (0.00%)	7 (1.42%)	<-10	1.95e-06	3.1e-05	(B) Primary
COA3	17q21.2	0 (0.00%)	7 (1.42%)	<-10	1.95e-06	3.1e-05	(B) Primary
DICER1-AS1	14q32.13	0 (0.00%)	7 (1.42%)	<-10	1.95e-06	3.1e-05	(B) Primary
DLGAP4-AS1	20q11.23	0 (0.00%)	7 (1.42%)	<-10	1.95e-06	3.1e-05	(B) Primary
DOCK4-AS1	7q31.1	0 (0.00%)	7 (1.42%)	<-10	1.95e-06	3.1e-05	(B) Primary
DPP10-AS1	2q14.1	0 (0.00%)	7 (1.42%)	<-10	1.95e-06	3.1e-05	(B) Primary
EFCAB13-DT	17q21.32	0 (0.00%)	7 (1.42%)	<-10	1.95e-06	3.1e-05	(B) Primary
EMSLR	7q22.1	0 (0.00%)	7 (1.42%)	<-10	1.95e-06	3.1e-05	(B) Primary
FANK1-AS1	10q26.2	0 (0.00%)	7 (1.42%)	<-10	1.95e-06	3.1e-05	(B) Primary
FSIP2-AS2	2q32.1	0 (0.00%)	7 (1.42%)	<-10	1.95e-06	3.1e-05	(B) Primary
GLRX5	14q32.13	0 (0.00%)	7 (1.42%)	<-10	1.95e-06	3.1e-05	(B) Primary
GPC6-AS2	13q31.3	0 (0.00%)	7 (1.42%)	<-10	1.95e-06	3.1e-05	(B) Primary
GSN-AS1	9q33.2	0 (0.00%)	7 (1.42%)	<-10	1.95e-06	3.1e-05	(B) Primary
GTSCR1	18q22.2	0 (0.00%)	7 (1.42%)	<-10	1.95e-06	3.1e-05	(B) Primary
LINC00408	13q12.11	0 (0.00%)	7 (1.42%)	<-10	1.95e-06	3.1e-05	(B) Primary
LINC00417	13q11	0 (0.00%)	7 (1.42%)	<-10	1.95e-06	3.1e-05	(B) Primary
LINC00424	13q12.11	0 (0.00%)	7 (1.42%)	<-10	1.95e-06	3.1e-05	(B) Primary
LINC00513	7q32.3	0 (0.00%)	7 (1.42%)	<-10	1.95e-06	3.1e-05	(B) Primary
LINC00539	13q12.11	0 (0.00%)	7 (1.42%)	<-10	1.95e-06	3.1e-05	(B) Primary
LINC00595	10q22.3	0 (0.00%)	7 (1.42%)	<-10	1.95e-06	3.1e-05	(B) Primary
LINC00609	14q13.2-q13.3	0 (0.00%)	7 (1.42%)	<-10	1.95e-06	3.1e-05	(B) Primary
LINC00613	4q28.3	0 (0.00%)	7 (1.42%)	<-10	1.95e-06	3.1e-05	(B) Primary
LINC00618	14q32.2	0 (0.00%)	7 (1.42%)	<-10	1.95e-06	3.1e-05	(B) Primary
LINC00671	17q21.31	0 (0.00%)	7 (1.42%)	<-10	1.95e-06	3.1e-05	(B) Primary
LINC01070	13q34	0 (0.00%)	7 (1.42%)	<-10	1.95e-06	3.1e-05	(B) Primary
LINC01187	5q35.1	0 (0.00%)	7 (1.42%)	<-10	1.95e-06	3.1e-05	(B) Primary
LINC01550	14q32.2	0 (0.00%)	7 (1.42%)	<-10	1.95e-06	3.1e-05	(B) Primary
LINC01929	18q21.2	0 (0.00%)	7 (1.42%)	<-10	1.95e-06	3.1e-05	(B) Primary
LINC02060	5q14.3	0 (0.00%)	7 (1.42%)	<-10	1.95e-06	3.1e-05	(B) Primary
LINC02067	3q26.1	0 (0.00%)	7 (1.42%)	<-10	1.95e-06	3.1e-05	(B) Primary
LINC02143	5q34	0 (0.00%)	7 (1.42%)	<-10	1.95e-06	3.1e-05	(B) Primary
LINC02148	5q23.1	0 (0.00%)	7 (1.42%)	<-10	1.95e-06	3.1e-05	(B) Primary
LINC02214	5q23.1	0 (0.00%)	7 (1.42%)	<-10	1.95e-06	3.1e-05	(B) Primary
LINC02292	14q32.13	0 (0.00%)	7 (1.42%)	<-10	1.95e-06	3.1e-05	(B) Primary
LINC02325	14q32.2	0 (0.00%)	7 (1.42%)	<-10	1.95e-06	3.1e-05	(B) Primary
LINC02370	12q24.33	0 (0.00%)	7 (1.42%)	<-10	1.95e-06	3.1e-05	(B) Primary
LINC02401	12q23.3	0 (0.00%)	7 (1.42%)	<-10	1.95e-06	3.1e-05	(B) Primary
MEG9	14q32.31	0 (0.00%)	7 (1.42%)	<-10	1.95e-06	3.1e-05	(B) Primary
MIATNB	22q12.1	0 (0.00%)	7 (1.42%)	<-10	1.95e-06	3.1e-05	(B) Primary
MIPEPP3	13q12.11	0 (0.00%)	7 (1.42%)	<-10	1.95e-06	3.1e-05	(B) Primary
MIR381HG	14q32.31	0 (0.00%)	7 (1.42%)	<-10	1.95e-06	3.1e-05	(B) Primary
MYO3B-AS1	2q31.1	0 (0.00%)	7 (1.42%)	<-10	1.95e-06	3.1e-05	(B) Primary
NBPF18P	1q21.3	0 (0.00%)	7 (1.42%)	<-10	1.95e-06	3.1e-05	(B) Primary
NFIA-AS1	1p31.3	0 (0.00%)	7 (1.42%)	<-10	1.95e-06	3.1e-05	(B) Primary
NPAP1L	16q21	0 (0.00%)	7 (1.42%)	<-10	1.95e-06	3.1e-05	(B) Primary
PAPOLA	14q32.2	0 (0.00%)	7 (1.42%)	<-10	1.95e-06	3.1e-05	(B) Primary
PRDM10-DT		0 (0.00%)	7 (1.42%)	<-10	1.95e-06	3.1e-05	(B) Primary
PSD2-AS1	5q31.2	0 (0.00%)	7 (1.42%)	<-10	1.95e-06	3.1e-05	(B) Primary
PTCSC3	14q13.3	0 (0.00%)	7 (1.42%)	<-10	1.95e-06	3.1e-05	(B) Primary
PTGES3L	17q21.31	0 (0.00%)	7 (1.42%)	<-10	1.95e-06	3.1e-05	(B) Primary
RALY-AS1	20q11.22	0 (0.00%)	7 (1.42%)	<-10	1.95e-06	3.1e-05	(B) Primary
RBFADN	18q23	0 (0.00%)	7 (1.42%)	<-10	1.95e-06	3.1e-05	(B) Primary
RND2	17q21.31	0 (0.00%)	7 (1.42%)	<-10	1.95e-06	3.1e-05	(B) Primary
RNU6-52P	13q12.11	0 (0.00%)	7 (1.42%)	<-10	1.95e-06	3.1e-05	(B) Primary
ROR1-AS1	1p31.3	0 (0.00%)	7 (1.42%)	<-10	1.95e-06	3.1e-05	(B) Primary
SACS-AS1	13q12.12	0 (0.00%)	7 (1.42%)	<-10	1.95e-06	3.1e-05	(B) Primary
SCARNA13	14q32.12	0 (0.00%)	7 (1.42%)	<-10	1.95e-06	3.1e-05	(B) Primary
SCHLAP1	2q31.3	0 (0.00%)	7 (1.42%)	<-10	1.95e-06	3.1e-05	(B) Primary
SEMA6A-AS1	5q23.1	0 (0.00%)	7 (1.42%)	<-10	1.95e-06	3.1e-05	(B) Primary
SLC9A9-AS1	3q24	0 (0.00%)	7 (1.42%)	<-10	1.95e-06	3.1e-05	(B) Primary
SLIT3-AS1	5q35.1	0 (0.00%)	7 (1.42%)	<-10	1.95e-06	3.1e-05	(B) Primary
SNAR-A10	19q13.33	0 (0.00%)	7 (1.42%)	<-10	1.95e-06	3.1e-05	(B) Primary
SNAR-A11	19q13.33	0 (0.00%)	7 (1.42%)	<-10	1.95e-06	3.1e-05	(B) Primary
SNAR-A14	19q13.33	0 (0.00%)	7 (1.42%)	<-10	1.95e-06	3.1e-05	(B) Primary
SNAR-A3	19q13.33	0 (0.00%)	7 (1.42%)	<-10	1.95e-06	3.1e-05	(B) Primary
SNAR-A4	19q13.33	0 (0.00%)	7 (1.42%)	<-10	1.95e-06	3.1e-05	(B) Primary
SNAR-A5	19q13.33	0 (0.00%)	7 (1.42%)	<-10	1.95e-06	3.1e-05	(B) Primary
SNAR-A6	19q13.33	0 (0.00%)	7 (1.42%)	<-10	1.95e-06	3.1e-05	(B) Primary
SNAR-A7	19q13.33	0 (0.00%)	7 (1.42%)	<-10	1.95e-06	3.1e-05	(B) Primary
SNAR-A8	19q13.33	0 (0.00%)	7 (1.42%)	<-10	1.95e-06	3.1e-05	(B) Primary
SNHG10	14q32.13	0 (0.00%)	7 (1.42%)	<-10	1.95e-06	3.1e-05	(B) Primary
SPATA13-AS1	13q12.12	0 (0.00%)	7 (1.42%)	<-10	1.95e-06	3.1e-05	(B) Primary
STPG2-AS1	4q22.3	0 (0.00%)	7 (1.42%)	<-10	1.95e-06	3.1e-05	(B) Primary
STPG3-AS1	9q34.3	0 (0.00%)	7 (1.42%)	<-10	1.95e-06	3.1e-05	(B) Primary
TARBP2	12q13.13	0 (0.00%)	7 (1.42%)	<-10	1.95e-06	3.1e-05	(B) Primary
TCAF2P1	7q35	0 (0.00%)	7 (1.42%)	<-10	1.95e-06	3.1e-05	(B) Primary
TIMM23B	10q11.23	0 (0.00%)	7 (1.42%)	<-10	1.95e-06	3.1e-05	(B) Primary
TUNAR	14q32.2	0 (0.00%)	7 (1.42%)	<-10	1.95e-06	3.1e-05	(B) Primary
VRK1	14q32.2	0 (0.00%)	7 (1.42%)	<-10	1.95e-06	3.1e-05	(B) Primary
ZBTB46-AS1	20q13.33	0 (0.00%)	7 (1.42%)	<-10	1.95e-06	3.1e-05	(B) Primary
ZNF236-DT	18q23	0 (0.00%)	7 (1.42%)	<-10	1.95e-06	3.1e-05	(B) Primary
ZNF341-AS1	20q11.22	0 (0.00%)	7 (1.42%)	<-10	1.95e-06	3.1e-05	(B) Primary
ZNF385C	17q21.2	0 (0.00%)	7 (1.42%)	<-10	1.95e-06	3.1e-05	(B) Primary
ADIPOR1	1q32.1	26 (4.90%)	12 (1.02%)	2.26	1.96e-06	3.11e-05	(A) Metastasis
LAD1	1q32.1	26 (4.90%)	12 (1.02%)	2.26	1.96e-06	3.11e-05	(A) Metastasis
UGT1A6	2q37.1	26 (4.90%)	12 (1.02%)	2.26	1.96e-06	3.11e-05	(A) Metastasis
C11ORF24	11q13.2	41 (7.72%)	30 (2.56%)	1.6	1.96e-06	3.12e-05	(A) Metastasis
CASP8AP2	6q15	24 (4.52%)	132 (11.24%)	-1.31	1.99e-06	3.15e-05	(B) Primary
SLC30A1	1q32.3	22 (4.14%)	8 (0.68%)	2.6	2.01e-06	3.18e-05	(A) Metastasis
THG1L	5q33.3	22 (4.14%)	8 (0.68%)	2.6	2.01e-06	3.18e-05	(A) Metastasis
TLR7	Xp22.2	22 (4.14%)	8 (0.68%)	2.6	2.01e-06	3.18e-05	(A) Metastasis
TLR8	Xp22.2	22 (4.14%)	8 (0.68%)	2.6	2.01e-06	3.18e-05	(A) Metastasis
CDKL5	Xp22.13	25 (4.71%)	11 (0.94%)	2.33	2.03e-06	3.21e-05	(A) Metastasis
CFAP44	3q13.2	25 (4.71%)	11 (0.94%)	2.33	2.03e-06	3.21e-05	(A) Metastasis
TXLNG	Xp22.2	25 (4.71%)	11 (0.94%)	2.33	2.03e-06	3.21e-05	(A) Metastasis
PLEC	8q24.3	97 (18.27%)	118 (9.96%)	0.88	2.04e-06	3.21e-05	(A) Metastasis
YTHDF3	8q12.3	49 (9.23%)	41 (3.49%)	1.4	2.06e-06	3.25e-05	(A) Metastasis
MAP3K15	Xp22.12	23 (4.33%)	9 (0.77%)	2.5	2.07e-06	3.25e-05	(A) Metastasis
AARS2	6p21.1	24 (4.52%)	10 (0.85%)	2.41	2.07e-06	3.25e-05	(A) Metastasis
ACE2	Xp22.2	24 (4.52%)	10 (0.85%)	2.41	2.07e-06	3.25e-05	(A) Metastasis
SOX30	5q33.3	24 (4.52%)	10 (0.85%)	2.41	2.07e-06	3.25e-05	(A) Metastasis
TIMM17A	1q32.1	24 (4.52%)	10 (0.85%)	2.41	2.07e-06	3.25e-05	(A) Metastasis
NEK11	3q22.1	37 (6.97%)	25 (2.13%)	1.71	2.14e-06	3.35e-05	(A) Metastasis
PRR23A	3q23	37 (6.97%)	25 (2.13%)	1.71	2.14e-06	3.35e-05	(A) Metastasis
OXR1	8q23.1	69 (12.99%)	71 (6.05%)	1.1	2.19e-06	3.42e-05	(A) Metastasis
PDCD1	2q37.3	53 (1.95%)	26 (0.66%)	1.55	2.2e-06	3.45e-05	(A) Metastasis
DSCAM	21q22.2	17 (1.49%)	57 (4.86%)	-1.7	2.23e-06	3.49e-05	(B) Primary
GHSR	3q26.31	52 (9.79%)	46 (3.88%)	1.33	2.25e-06	3.52e-05	(A) Metastasis
KRTAP10-11	21q22.3	11 (5.56%)	6 (0.51%)	3.46	2.26e-06	3.53e-05	(A) Metastasis
GPR173	Xp11.22	12 (6.06%)	1 (0.20%)	4.9	2.29e-06	3.57e-05	(A) Metastasis
NHSL2	Xq13.1	12 (6.06%)	1 (0.20%)	4.9	2.29e-06	3.57e-05	(A) Metastasis
PAGE2B	Xp11.21	12 (6.06%)	1 (0.20%)	4.9	2.29e-06	3.57e-05	(A) Metastasis
GALNT11	7q36.1	22 (4.14%)	29 (1.02%)	2.03	2.3e-06	3.58e-05	(A) Metastasis
CCDC6	10q21.2	40 (7.53%)	29 (2.47%)	1.61	2.3e-06	3.59e-05	(A) Metastasis
DUSP13B		43 (8.10%)	33 (2.81%)	1.53	2.32e-06	3.61e-05	(A) Metastasis
RGR	10q23.1	43 (8.10%)	33 (2.81%)	1.53	2.32e-06	3.61e-05	(A) Metastasis
PML	15q24.1	16 (3.01%)	3 (0.26%)	3.56	2.35e-06	3.66e-05	(A) Metastasis
ZNF831	20q13.32	25 (5.18%)	13 (1.11%)	2.22	2.39e-06	3.71e-05	(A) Metastasis
NDUFAF4	6q16.1	20 (3.77%)	118 (10.05%)	-1.42	2.4e-06	3.73e-05	(B) Primary
ENOX2	Xq26.1	11 (5.56%)	6 (0.51%)	3.44	2.45e-06	3.8e-05	(A) Metastasis
C11ORF80	11q13.2	36 (6.78%)	24 (2.04%)	1.73	2.47e-06	3.82e-05	(A) Metastasis
DIP2C	10p15.3	36 (6.78%)	24 (2.04%)	1.73	2.47e-06	3.82e-05	(A) Metastasis
NUDT16	3q22.1	36 (6.78%)	24 (2.04%)	1.73	2.47e-06	3.82e-05	(A) Metastasis
P2RY13	3q25.1	36 (6.78%)	24 (2.04%)	1.73	2.47e-06	3.82e-05	(A) Metastasis
EIF1AX	Xp22.12	50 (1.84%)	18 (0.56%)	1.72	2.57e-06	3.97e-05	(A) Metastasis
LINC00856	10q22.3	15 (10.00%)	6 (1.21%)	3.04	2.59e-06	4e-05	(A) Metastasis
MAGEA6	Xq28	12 (6.06%)	8 (0.68%)	3.15	2.61e-06	4.03e-05	(A) Metastasis
OTC	Xp11.4	12 (6.06%)	8 (0.68%)	3.15	2.61e-06	4.03e-05	(A) Metastasis
GPS2	17p13.1	73 (2.83%)	45 (1.20%)	1.23	2.64e-06	4.07e-05	(A) Metastasis
PDP1	8q22.1	68 (12.81%)	70 (5.96%)	1.1	2.64e-06	4.07e-05	(A) Metastasis
PXDNL	8q11.22-q11.23	50 (9.42%)	43 (3.66%)	1.36	2.65e-06	4.08e-05	(A) Metastasis
RET	10q11.21	66 (2.43%)	38 (0.97%)	1.32	2.65e-06	4.08e-05	(A) Metastasis
LIPK	10q23.31	90 (16.95%)	107 (9.03%)	0.91	2.67e-06	4.1e-05	(A) Metastasis
CERS2	1q21.3	39 (7.34%)	28 (2.39%)	1.62	2.7e-06	4.14e-05	(A) Metastasis
MINPP1	10q23.2	78 (14.69%)	87 (7.34%)	1	2.73e-06	4.19e-05	(A) Metastasis
ATM	11q22.3	175 (6.43%)	154 (3.92%)	0.71	2.74e-06	4.2e-05	(A) Metastasis
VEGFA	6p21.1	35 (1.36%)	12 (0.32%)	2.08	2.75e-06	4.2e-05	(A) Metastasis
DUSP29	10q22.2	42 (7.91%)	32 (2.73%)	1.54	2.75e-06	4.2e-05	(A) Metastasis
ENSA	1q21.3	42 (7.91%)	32 (2.73%)	1.54	2.75e-06	4.2e-05	(A) Metastasis
ERICH6	3q25.1	42 (7.91%)	32 (2.73%)	1.54	2.75e-06	4.2e-05	(A) Metastasis
NRG1	8p12	30 (5.65%)	57 (1.86%)	1.6	2.79e-06	4.27e-05	(A) Metastasis
FHL5	6q16.1	22 (4.14%)	124 (10.56%)	-1.35	2.81e-06	4.29e-05	(B) Primary
SIM1	6q16.3	22 (4.14%)	124 (10.56%)	-1.35	2.81e-06	4.29e-05	(B) Primary
LINC01298	8q22.1	57 (11.80%)	60 (5.11%)	1.21	2.81e-06	4.29e-05	(A) Metastasis
PLPP1	5q11.2	32 (6.03%)	64 (2.08%)	1.53	2.81e-06	4.29e-05	(A) Metastasis
SPSB4	3q23	35 (6.59%)	23 (1.96%)	1.75	2.85e-06	4.34e-05	(A) Metastasis
NUTM2D	10q23.2	68 (12.81%)	71 (5.99%)	1.1	2.85e-06	4.34e-05	(A) Metastasis
ADORA1	1q32.1	30 (5.65%)	17 (1.45%)	1.96	2.9e-06	4.42e-05	(A) Metastasis
CDHR1	10q23.1	47 (8.85%)	39 (3.32%)	1.41	2.94e-06	4.47e-05	(A) Metastasis
MED12	Xq13.1	123 (4.52%)	96 (2.45%)	0.88	2.95e-06	4.48e-05	(A) Metastasis
GPR20	8q24.3	76 (14.31%)	84 (7.09%)	1.01	2.97e-06	4.51e-05	(A) Metastasis
ETV5	3q27.2	24 (4.52%)	51 (1.30%)	1.8	2.98e-06	4.51e-05	(A) Metastasis
GSX2	4q12	17 (3.20%)	4 (0.34%)	3.23	3.15e-06	4.76e-05	(A) Metastasis
IRAK1	Xq28	17 (3.20%)	4 (0.34%)	3.23	3.15e-06	4.76e-05	(A) Metastasis
KIF4A	Xq13.1	17 (3.20%)	4 (0.34%)	3.23	3.15e-06	4.76e-05	(A) Metastasis
MAGEA3	Xq28	17 (3.20%)	4 (0.34%)	3.23	3.15e-06	4.76e-05	(A) Metastasis
MED12L	3q25.1	44 (8.29%)	35 (2.98%)	1.47	3.15e-06	4.76e-05	(A) Metastasis
CDC42SE1	1q21.3	38 (7.16%)	27 (2.30%)	1.64	3.15e-06	4.76e-05	(A) Metastasis
FOXL2NB	3q22.3	38 (7.16%)	27 (2.30%)	1.64	3.15e-06	4.76e-05	(A) Metastasis
P2RY12	3q25.1	38 (7.16%)	27 (2.30%)	1.64	3.15e-06	4.76e-05	(A) Metastasis
ALB	4q13.3	28 (5.26%)	15 (1.27%)	2.06	3.17e-06	4.78e-05	(A) Metastasis
GPATCH11	2p22.2	16 (3.31%)	4 (0.34%)	3.28	3.17e-06	4.78e-05	(A) Metastasis
UBE2J1	6q15	24 (4.52%)	130 (11.07%)	-1.29	3.17e-06	4.78e-05	(B) Primary
GRID1	10q23.1-q23.2	49 (9.23%)	42 (3.58%)	1.37	3.17e-06	4.78e-05	(A) Metastasis
BMP6	6p24.3	29 (5.46%)	16 (1.36%)	2	3.22e-06	4.84e-05	(A) Metastasis
SYNE2	14q23.2	29 (5.46%)	16 (1.36%)	2	3.22e-06	4.84e-05	(A) Metastasis
LIPJ	10q23.31	100 (18.83%)	125 (10.55%)	0.84	3.24e-06	4.87e-05	(A) Metastasis
PAGE3	Xp11.21	10 (6.67%)	1 (0.20%)	5.04	3.26e-06	4.9e-05	(A) Metastasis
NCF1C	7q11.23	31 (6.42%)	21 (1.79%)	1.84	3.27e-06	4.91e-05	(A) Metastasis
TFDP2	3q23	34 (6.40%)	22 (1.87%)	1.77	3.28e-06	4.91e-05	(A) Metastasis
RPP25L	9p13.3	22 (4.55%)	10 (0.85%)	2.42	3.29e-06	4.94e-05	(A) Metastasis
GABRR1	6q15	25 (4.71%)	133 (11.33%)	-1.27	3.34e-06	5e-05	(B) Primary
ASXL2	2p23.3	97 (3.56%)	69 (1.76%)	1.02	3.34e-06	5.01e-05	(A) Metastasis
SDCBP	8q12.1	51 (9.60%)	45 (3.83%)	1.33	3.36e-06	5.02e-05	(A) Metastasis
PPP1R42	8q13.1	63 (11.86%)	63 (5.37%)	1.14	3.44e-06	5.14e-05	(A) Metastasis
NKX3-1	8p21.2	148 (5.44%)	124 (3.16%)	0.78	3.52e-06	5.25e-05	(A) Metastasis
FSBP	8q22.1	59 (12.22%)	64 (5.45%)	1.16	3.53e-06	5.26e-05	(A) Metastasis
AGAP1	2q37.2	28 (5.27%)	15 (1.28%)	2.05	3.54e-06	5.28e-05	(A) Metastasis
FANCG	9p13.3	28 (5.27%)	15 (1.28%)	2.05	3.54e-06	5.28e-05	(A) Metastasis
DNAJC5B	8q13.1	55 (10.36%)	51 (4.34%)	1.25	3.56e-06	5.31e-05	(A) Metastasis
EPC1	10p11.22	26 (4.90%)	13 (1.10%)	2.16	3.65e-06	5.44e-05	(A) Metastasis
NOM1	7q36.3	32 (6.03%)	20 (1.69%)	1.84	3.67e-06	5.46e-05	(A) Metastasis
CAMK2G	10q22.2	42 (7.91%)	33 (2.78%)	1.51	3.68e-06	5.48e-05	(A) Metastasis
GALNTL5	7q36.1	21 (3.95%)	30 (0.98%)	2.01	3.7e-06	5.51e-05	(A) Metastasis
ECM1	1q21.2	43 (8.10%)	34 (2.90%)	1.48	3.74e-06	5.55e-05	(A) Metastasis
TMPPE	3p22.3	20 (4.14%)	8 (0.68%)	2.6	3.74e-06	5.55e-05	(A) Metastasis
PKHD1	6p12.3-p12.2	33 (6.21%)	21 (1.79%)	1.8	3.75e-06	5.57e-05	(A) Metastasis
CMC4	Xq28	13 (6.57%)	2 (0.40%)	4.02	3.78e-06	5.59e-05	(A) Metastasis
HSD17B10	Xp11.22	13 (6.57%)	2 (0.40%)	4.02	3.78e-06	5.59e-05	(A) Metastasis
OPN1MW	Xq28	13 (6.57%)	2 (0.40%)	4.02	3.78e-06	5.59e-05	(A) Metastasis
RAB39B	Xq28	13 (6.57%)	2 (0.40%)	4.02	3.78e-06	5.59e-05	(A) Metastasis
VBP1	Xq28	13 (6.57%)	2 (0.40%)	4.02	3.78e-06	5.59e-05	(A) Metastasis
PURPL	5p14.1	18 (3.73%)	6 (0.51%)	2.87	3.79e-06	5.6e-05	(A) Metastasis
DNAH11	7p15.3	40 (7.53%)	30 (2.56%)	1.56	3.82e-06	5.64e-05	(A) Metastasis
MELK	9p13.2	19 (3.58%)	14 (0.70%)	2.36	3.83e-06	5.64e-05	(A) Metastasis
CARD14	17q25.3	18 (3.39%)	5 (0.43%)	2.99	3.83e-06	5.64e-05	(A) Metastasis
DCAF8L1	Xp21.3	18 (3.39%)	5 (0.43%)	2.99	3.83e-06	5.64e-05	(A) Metastasis
STS	Xp22.31	18 (3.39%)	5 (0.43%)	2.99	3.83e-06	5.64e-05	(A) Metastasis
EGFLAM-AS4	5p13.2	19 (3.93%)	7 (0.60%)	2.72	3.83e-06	5.64e-05	(A) Metastasis
SMIM13	6p24.2	19 (3.93%)	7 (0.60%)	2.72	3.83e-06	5.64e-05	(A) Metastasis
MGST2	4q31.1	27 (5.08%)	14 (1.19%)	2.09	3.86e-06	5.68e-05	(A) Metastasis
LINC01590	6q15-q16.1	20 (4.14%)	126 (10.73%)	-1.37	3.91e-06	5.74e-05	(B) Primary
CLTA	9p13.3	25 (4.71%)	12 (1.01%)	2.22	3.91e-06	5.74e-05	(A) Metastasis
ITGB1	10p11.22	25 (4.71%)	12 (1.01%)	2.22	3.91e-06	5.74e-05	(A) Metastasis
FAM110B	8q12.1	50 (9.42%)	44 (3.75%)	1.33	4.03e-06	5.9e-05	(A) Metastasis
BCL2L14	12p13.2	5 (0.42%)	17 (3.44%)	-3.03	4.03e-06	5.9e-05	(B) Primary
FAM186A	12q13.12	11 (7.33%)	2 (0.40%)	4.18	4.08e-06	5.97e-05	(A) Metastasis
ASAP1	8q24.21-q24.22	62 (11.68%)	62 (5.28%)	1.14	4.15e-06	6.08e-05	(A) Metastasis
SLC34A2	4p15.2	26 (4.90%)	13 (1.11%)	2.14	4.17e-06	6.1e-05	(A) Metastasis
TXNDC5	6p24.3	26 (4.90%)	13 (1.11%)	2.14	4.17e-06	6.1e-05	(A) Metastasis
PPM1D	17q23.3	42 (1.63%)	18 (0.48%)	1.76	4.18e-06	6.1e-05	(A) Metastasis
CA5B	Xp22.2	21 (10.61%)	10 (2.02%)	2.39	4.23e-06	6.18e-05	(A) Metastasis
CYRIB	8q24.21	60 (11.30%)	59 (5.03%)	1.17	4.25e-06	6.2e-05	(A) Metastasis
COX7C	5q14.3	18 (0.70%)	31 (2.62%)	-1.9	4.27e-06	6.22e-05	(B) Primary
ANKHD1	5q31.3	32 (6.03%)	20 (1.70%)	1.82	4.28e-06	6.22e-05	(A) Metastasis
DYSF	2p13.2	32 (6.03%)	20 (1.70%)	1.82	4.28e-06	6.22e-05	(A) Metastasis
WDFY4	10q11.23	32 (6.03%)	20 (1.70%)	1.82	4.28e-06	6.22e-05	(A) Metastasis
H2BC18	1q21.2	21 (0.77%)	32 (2.73%)	-1.82	4.28e-06	6.22e-05	(B) Primary
GPR171	3q25.1	36 (6.78%)	25 (2.13%)	1.67	4.28e-06	6.22e-05	(A) Metastasis
PXYLP1	3q23	36 (6.78%)	25 (2.13%)	1.67	4.28e-06	6.22e-05	(A) Metastasis
NUP153	6p22.3	23 (4.33%)	10 (0.84%)	2.36	4.3e-06	6.24e-05	(A) Metastasis
GOLPH3L	1q21.3	42 (7.91%)	33 (2.81%)	1.49	4.43e-06	6.43e-05	(A) Metastasis
PI4KB	1q21.3	42 (7.91%)	33 (2.81%)	1.49	4.43e-06	6.43e-05	(A) Metastasis
NRBF2	10q21.3	38 (7.16%)	28 (2.36%)	1.6	4.44e-06	6.44e-05	(A) Metastasis
SNORA72	8q22.2	55 (11.39%)	58 (4.94%)	1.2	4.45e-06	6.44e-05	(A) Metastasis
IL24	1q32.1	25 (4.71%)	12 (1.02%)	2.2	4.46e-06	6.44e-05	(A) Metastasis
SLC6A7	5q32	25 (4.71%)	12 (1.02%)	2.2	4.46e-06	6.44e-05	(A) Metastasis
PRUNE1	1q21.3	39 (7.34%)	29 (2.47%)	1.57	4.49e-06	6.49e-05	(A) Metastasis
SCN5A	3p22.2	39 (7.34%)	29 (2.47%)	1.57	4.49e-06	6.49e-05	(A) Metastasis
EIF4G1	3q27.1	47 (8.85%)	40 (3.41%)	1.38	4.54e-06	6.55e-05	(A) Metastasis
RAD51C	17q22	33 (1.21%)	11 (0.28%)	2.11	4.56e-06	6.58e-05	(A) Metastasis
ZNF804A	2q32.1	25 (0.92%)	35 (2.98%)	-1.7	4.63e-06	6.68e-05	(B) Primary
PSMB1	6q27	17 (5.11%)	10 (0.85%)	2.58	4.67e-06	6.72e-05	(A) Metastasis
COL4A1	13q34	24 (4.52%)	11 (0.94%)	2.27	4.69e-06	6.74e-05	(A) Metastasis
CRCP	7q11.21	24 (4.52%)	11 (0.94%)	2.27	4.69e-06	6.74e-05	(A) Metastasis
GDNF	5p13.2	24 (4.52%)	11 (0.94%)	2.27	4.69e-06	6.74e-05	(A) Metastasis
HMGXB3	5q32	24 (4.52%)	11 (0.94%)	2.27	4.69e-06	6.74e-05	(A) Metastasis
C5ORF52	5q33.3	20 (3.77%)	7 (0.60%)	2.66	4.7e-06	6.76e-05	(A) Metastasis
IKZF1	7p12.2	48 (1.76%)	23 (0.59%)	1.59	4.77e-06	6.84e-05	(A) Metastasis
C6ORF163	6q15	23 (4.33%)	125 (10.65%)	-1.3	4.77e-06	6.84e-05	(B) Primary
NUTM2A	10q23.2	67 (12.62%)	71 (5.99%)	1.07	4.8e-06	6.88e-05	(A) Metastasis
CLTRN	Xp22.2	20 (10.10%)	9 (1.82%)	2.47	4.81e-06	6.89e-05	(A) Metastasis
ZNF81	Xp11.23	10 (1.88%)	7 (0.18%)	3.4	4.81e-06	6.89e-05	(A) Metastasis
SHANK2	11q13.3-q13.4	49 (9.23%)	43 (3.66%)	1.33	4.83e-06	6.9e-05	(A) Metastasis
ENY2	8q23.1	63 (11.86%)	64 (5.45%)	1.12	4.86e-06	6.94e-05	(A) Metastasis
SGK3	8q13.1	63 (11.86%)	64 (5.45%)	1.12	4.86e-06	6.94e-05	(A) Metastasis
BMX	Xp22.2	23 (4.33%)	10 (0.85%)	2.35	4.86e-06	6.94e-05	(A) Metastasis
MLXIPL	7q11.23	31 (5.84%)	19 (1.62%)	1.85	4.86e-06	6.94e-05	(A) Metastasis
DNAH12	3p14.3	21 (3.95%)	8 (0.68%)	2.54	4.89e-06	6.98e-05	(A) Metastasis
ASPM	1q31.3	43 (8.10%)	35 (2.95%)	1.46	4.91e-06	7e-05	(A) Metastasis
PVT1	8q24.21	59 (12.22%)	65 (5.54%)	1.14	4.92e-06	7.01e-05	(A) Metastasis
BEND2	Xp22.13	22 (4.14%)	9 (0.77%)	2.43	4.93e-06	7.01e-05	(A) Metastasis
DCAF12	9p13.3	22 (4.14%)	9 (0.77%)	2.43	4.93e-06	7.01e-05	(A) Metastasis
POLA1	Xp22.11-p21.3	22 (4.14%)	9 (0.77%)	2.43	4.93e-06	7.01e-05	(A) Metastasis
SDK2	17q25.1	22 (4.14%)	9 (0.77%)	2.43	4.93e-06	7.01e-05	(A) Metastasis
ZNF157	Xp11.3	10 (5.05%)	5 (0.43%)	3.57	4.94e-06	7.02e-05	(A) Metastasis
PPP1R15B	1q32.1	35 (6.59%)	24 (2.04%)	1.69	4.98e-06	7.05e-05	(A) Metastasis
NSDHL	Xq28	14 (7.07%)	3 (0.61%)	3.54	4.98e-06	7.05e-05	(A) Metastasis
PDZD11	Xq13.1	14 (7.07%)	3 (0.61%)	3.54	4.98e-06	7.05e-05	(A) Metastasis
TREX2	Xq28	14 (7.07%)	3 (0.61%)	3.54	4.98e-06	7.05e-05	(A) Metastasis
ACTG1P25	1q32.1	24 (4.97%)	5 (0.74%)	2.76	5.07e-06	7.18e-05	(A) Metastasis
PCAT6	1q32.1	24 (4.97%)	5 (0.74%)	2.76	5.07e-06	7.18e-05	(A) Metastasis
TNFRSF11B	8q24.12	59 (11.11%)	58 (4.94%)	1.17	5.13e-06	7.26e-05	(A) Metastasis
KMT2D	12q13.12	223 (8.20%)	213 (5.42%)	0.6	5.2e-06	7.35e-05	(A) Metastasis
SH3BGR	21q22.2	14 (0.81%)	45 (2.87%)	-1.83	5.24e-06	7.4e-05	(B) Primary
CLSTN2	3q23	38 (7.16%)	28 (2.39%)	1.59	5.28e-06	7.44e-05	(A) Metastasis
DNAH3	16p12.3	38 (7.16%)	28 (2.39%)	1.59	5.28e-06	7.44e-05	(A) Metastasis
PTPRC	1q31.3-q32.1	38 (7.16%)	28 (2.39%)	1.59	5.28e-06	7.44e-05	(A) Metastasis
MSH2	2p21-p16.3	50 (1.84%)	25 (0.64%)	1.53	5.32e-06	7.49e-05	(A) Metastasis
KLHL32	6q16.1	21 (3.95%)	118 (10.05%)	-1.35	5.32e-06	7.49e-05	(B) Primary
WNK3	Xp11.22	12 (6.06%)	9 (0.77%)	2.98	5.33e-06	7.49e-05	(A) Metastasis
OPN4	10q23.2	45 (8.47%)	38 (3.21%)	1.4	5.35e-06	7.52e-05	(A) Metastasis
CNR1	6q15	26 (4.90%)	134 (11.41%)	-1.22	5.47e-06	7.69e-05	(B) Primary
BICC1	10q21.1	30 (5.65%)	18 (1.53%)	1.88	5.5e-06	7.72e-05	(A) Metastasis
SPDYE5	7q11.23	30 (5.65%)	18 (1.53%)	1.88	5.5e-06	7.72e-05	(A) Metastasis
DUSP21	Xp11.3	11 (5.56%)	7 (0.60%)	3.22	5.51e-06	7.73e-05	(A) Metastasis
ARID3C	9p13.3	24 (4.97%)	13 (1.11%)	2.17	5.61e-06	7.86e-05	(A) Metastasis
VCX2	Xp22.31	15 (7.58%)	4 (0.81%)	3.23	5.75e-06	8.05e-05	(A) Metastasis
CLCN5	Xp11.23	8 (4.04%)	2 (0.17%)	4.57	5.75e-06	8.05e-05	(A) Metastasis
RAP2C	Xq26.2	8 (4.04%)	2 (0.17%)	4.57	5.75e-06	8.05e-05	(A) Metastasis
USH2A	1q41	59 (11.11%)	59 (4.98%)	1.16	5.81e-06	8.12e-05	(A) Metastasis
MCMDC2	8q13.1	62 (11.68%)	63 (5.37%)	1.12	5.86e-06	8.19e-05	(A) Metastasis
ANKRD13D	11q13.2	43 (8.10%)	35 (2.98%)	1.44	5.92e-06	8.27e-05	(A) Metastasis
CLPTM1	19q13.32	0 (0.00%)	10 (0.85%)	<-10	6.03e-06	8.39e-05	(B) Primary
HOXC4	12q13.13	0 (0.00%)	10 (0.85%)	<-10	6.03e-06	8.39e-05	(B) Primary
IZUMO1	19q13.33	0 (0.00%)	10 (0.85%)	<-10	6.03e-06	8.39e-05	(B) Primary
PSME3	17q21.31	0 (0.00%)	10 (0.85%)	<-10	6.03e-06	8.39e-05	(B) Primary
SERPINA9	14q32.13	0 (0.00%)	10 (0.85%)	<-10	6.03e-06	8.39e-05	(B) Primary
ZBTB44	11q24.3	0 (0.00%)	10 (0.85%)	<-10	6.03e-06	8.39e-05	(B) Primary
RMDN1	8q21.3	60 (11.30%)	60 (5.11%)	1.14	6.05e-06	8.41e-05	(A) Metastasis
AMELX	Xp22.2	17 (8.59%)	6 (1.21%)	2.82	6.07e-06	8.43e-05	(A) Metastasis
HCCS	Xp22.2	17 (8.59%)	6 (1.21%)	2.82	6.07e-06	8.43e-05	(A) Metastasis
ADCY8	8q24.22	67 (12.62%)	71 (6.05%)	1.06	6.16e-06	8.56e-05	(A) Metastasis
PKD1L1	7p12.3	29 (5.46%)	17 (1.45%)	1.92	6.19e-06	8.59e-05	(A) Metastasis
ZNF687	1q21.3	37 (6.97%)	27 (2.30%)	1.6	6.19e-06	8.59e-05	(A) Metastasis
GHITM	10q23.1	40 (7.53%)	31 (2.64%)	1.51	6.21e-06	8.61e-05	(A) Metastasis
NSMAF	8q12.1	54 (10.17%)	51 (4.34%)	1.23	6.27e-06	8.69e-05	(A) Metastasis
DLG5-AS1	10q22.3	15 (10.00%)	7 (1.42%)	2.82	6.5e-06	8.98e-05	(A) Metastasis
ZMIZ1-AS1	10q22.3	15 (10.00%)	7 (1.42%)	2.82	6.5e-06	8.98e-05	(A) Metastasis
AGAP2	12q14.1	15 (2.82%)	3 (0.26%)	3.47	6.51e-06	8.98e-05	(A) Metastasis
CCDC40	17q25.3	15 (2.82%)	3 (0.26%)	3.47	6.51e-06	8.98e-05	(A) Metastasis
EMD	Xq28	15 (2.82%)	3 (0.26%)	3.47	6.51e-06	8.98e-05	(A) Metastasis
PHOX2A	11q13.4	15 (2.82%)	3 (0.26%)	3.47	6.51e-06	8.98e-05	(A) Metastasis
RRAGD	6q15	25 (4.71%)	130 (11.07%)	-1.23	6.59e-06	9.09e-05	(B) Primary
NPR2	9p13.3	32 (6.03%)	21 (1.77%)	1.77	6.59e-06	9.09e-05	(A) Metastasis
LIPF	10q23.31	92 (17.33%)	114 (9.62%)	0.85	6.85e-06	9.44e-05	(A) Metastasis
BUD23	7q11.23	28 (5.27%)	16 (1.36%)	1.95	6.92e-06	9.52e-05	(A) Metastasis
CAMK2A	5q32	28 (5.27%)	16 (1.36%)	1.95	6.92e-06	9.52e-05	(A) Metastasis
NCF1	7q11.23	28 (5.27%)	16 (1.36%)	1.95	6.92e-06	9.52e-05	(A) Metastasis
FER1L6-AS1	8q24.13	56 (11.59%)	61 (5.20%)	1.16	7.01e-06	9.63e-05	(A) Metastasis
LYRM2	6q15	27 (5.08%)	136 (11.58%)	-1.19	7.06e-06	9.7e-05	(B) Primary
GPR63	6q16.1	22 (4.14%)	120 (10.22%)	-1.3	7.16e-06	9.83e-05	(B) Primary
CCL21	9p13.3	22 (4.55%)	11 (0.94%)	2.28	7.22e-06	9.9e-05	(A) Metastasis
DNAJB5	9p13.3	22 (4.55%)	11 (0.94%)	2.28	7.22e-06	9.9e-05	(A) Metastasis
EIF3H	8q23.3-q24.11	59 (11.11%)	59 (5.03%)	1.14	7.3e-06	0.0001	(A) Metastasis
TCHHL1	1q21.3	39 (7.34%)	30 (2.56%)	1.52	7.34e-06	0.000101	(A) Metastasis
ZFPM2	8q23	71 (13.37%)	78 (6.64%)	1.01	7.41e-06	0.000101	(A) Metastasis
PRKAA1	5p13.1	14 (2.90%)	3 (0.26%)	3.5	7.51e-06	0.000103	(A) Metastasis
CITED1	Xq13.1	11 (5.56%)	1 (0.20%)	4.78	7.71e-06	0.000105	(A) Metastasis
GPR34	Xp11.4	11 (5.56%)	1 (0.20%)	4.78	7.71e-06	0.000105	(A) Metastasis
GPR82	Xp11.4	11 (5.56%)	1 (0.20%)	4.78	7.71e-06	0.000105	(A) Metastasis
NUDT11	Xp11.22	11 (5.56%)	1 (0.20%)	4.78	7.71e-06	0.000105	(A) Metastasis
RBMX2	Xq26.1	11 (5.56%)	1 (0.20%)	4.78	7.71e-06	0.000105	(A) Metastasis
TVP23C	17p12	11 (5.56%)	1 (0.20%)	4.78	7.71e-06	0.000105	(A) Metastasis
XAGE3	Xp11.22	11 (5.56%)	1 (0.20%)	4.78	7.71e-06	0.000105	(A) Metastasis
EPPK1	8q24.3	90 (16.95%)	111 (9.37%)	0.86	7.72e-06	0.000105	(A) Metastasis
ORC3	6q15	24 (4.52%)	126 (10.73%)	-1.25	7.92e-06	0.000108	(B) Primary
SMIM8	6q15	24 (4.52%)	126 (10.73%)	-1.25	7.92e-06	0.000108	(B) Primary
ALOX12B	17p13.1	70 (2.93%)	52 (1.33%)	1.14	8.03e-06	0.000109	(A) Metastasis
SPATA31F2P		21 (4.35%)	10 (0.85%)	2.35	8.04e-06	0.000109	(A) Metastasis
SNORA58	3q22.1	32 (6.63%)	24 (2.04%)	1.7	8.05e-06	0.000109	(A) Metastasis
EIF3E	8q23.1	62 (11.68%)	64 (5.45%)	1.1	8.21e-06	0.000111	(A) Metastasis
GPR15LG		41 (7.72%)	33 (2.81%)	1.46	8.36e-06	0.000113	(A) Metastasis
DDX3X	Xp11.4	16 (3.01%)	4 (0.34%)	3.14	8.4e-06	0.000113	(A) Metastasis
FAM120C	Xp11.22	16 (3.01%)	4 (0.34%)	3.14	8.4e-06	0.000113	(A) Metastasis
FOLR2	11q13.4	16 (3.01%)	4 (0.34%)	3.14	8.4e-06	0.000113	(A) Metastasis
LNX1	4q12	16 (3.01%)	4 (0.34%)	3.14	8.4e-06	0.000113	(A) Metastasis
OPN1LW	Xq28	16 (3.01%)	4 (0.34%)	3.14	8.4e-06	0.000113	(A) Metastasis
PNMA3	Xq28	16 (3.01%)	4 (0.34%)	3.14	8.4e-06	0.000113	(A) Metastasis
SLC7A3	Xq13.1	16 (3.01%)	4 (0.34%)	3.14	8.4e-06	0.000113	(A) Metastasis
TCF24	8q13.1	60 (11.30%)	61 (5.20%)	1.12	8.53e-06	0.000115	(A) Metastasis
SGMS2	4q25	10 (2.07%)	9 (0.23%)	3.17	8.54e-06	0.000115	(A) Metastasis
OSBPL2	20q13.33	13 (2.45%)	7 (0.31%)	2.97	8.62e-06	0.000116	(A) Metastasis
MX1	21q22.3	15 (0.55%)	55 (1.78%)	-1.69	8.72e-06	0.000118	(B) Primary
DNAH10	12q24.31	31 (5.84%)	20 (1.70%)	1.78	8.81e-06	0.000119	(A) Metastasis
GLIPR2	9p13.3	24 (4.52%)	12 (1.01%)	2.16	8.84e-06	0.000119	(A) Metastasis
HAS2-AS1	8q24.13	52 (10.77%)	55 (4.68%)	1.2	8.84e-06	0.000119	(A) Metastasis
RPL21P44	4q12	15 (3.11%)	4 (0.34%)	3.19	8.93e-06	0.00012	(A) Metastasis
CYP7A1	8q12.1	50 (9.42%)	46 (3.92%)	1.26	8.95e-06	0.00012	(A) Metastasis
TOX	8q12.1	50 (9.42%)	46 (3.92%)	1.26	8.95e-06	0.00012	(A) Metastasis
ASCC3	6q16.3	22 (4.14%)	119 (10.14%)	-1.29	9.02e-06	0.000121	(B) Primary
PPEF2	4q21.1	25 (4.71%)	13 (1.11%)	2.09	9.26e-06	0.000124	(A) Metastasis
ZAR1	4p11	19 (3.93%)	8 (0.68%)	2.53	9.47e-06	0.000127	(A) Metastasis
MANEA	6q16.1	23 (4.33%)	122 (10.39%)	-1.26	9.49e-06	0.000127	(B) Primary
ELF3	1q32.1	46 (2.37%)	25 (0.83%)	1.52	9.6e-06	0.000128	(A) Metastasis
CEP78	9q21.2	16 (3.31%)	5 (0.43%)	2.96	9.76e-06	0.000131	(A) Metastasis
CABIN1	22q11.23	17 (3.20%)	5 (0.43%)	2.91	9.89e-06	0.000132	(A) Metastasis
FAM9A	Xp22.31	17 (3.20%)	5 (0.43%)	2.91	9.89e-06	0.000132	(A) Metastasis
PLXNB3	Xq28	17 (3.20%)	5 (0.43%)	2.91	9.89e-06	0.000132	(A) Metastasis
PNMA5	Xq28	17 (3.20%)	5 (0.43%)	2.91	9.89e-06	0.000132	(A) Metastasis
SRPK3	Xq28	17 (3.20%)	5 (0.43%)	2.91	9.89e-06	0.000132	(A) Metastasis
ABHD1	2p23.3	18 (3.73%)	7 (0.60%)	2.64	9.91e-06	0.000132	(A) Metastasis
FBXL2	3p22.3	18 (3.73%)	7 (0.60%)	2.64	9.91e-06	0.000132	(A) Metastasis
FEZ2	2p22.2	18 (3.73%)	7 (0.60%)	2.64	9.91e-06	0.000132	(A) Metastasis
OBSL1	2q35	18 (3.73%)	7 (0.60%)	2.64	9.91e-06	0.000132	(A) Metastasis
PDGFRB	5q32	50 (1.84%)	26 (0.66%)	1.47	9.95e-06	0.000132	(A) Metastasis
ARHGEF17	11q13.4	24 (4.52%)	12 (1.02%)	2.14	1e-05	0.000133	(A) Metastasis
CELSR1	22q13.31	24 (4.52%)	12 (1.02%)	2.14	1e-05	0.000133	(A) Metastasis
PWWP2A	5q33.3	24 (4.52%)	12 (1.02%)	2.14	1e-05	0.000133	(A) Metastasis
TIGD6	5q32	24 (4.52%)	12 (1.02%)	2.14	1e-05	0.000133	(A) Metastasis
ATP2C1	3q22.1	37 (6.97%)	28 (2.39%)	1.55	1.02e-05	0.000135	(A) Metastasis
CHKA	11q13.2	37 (6.97%)	28 (2.39%)	1.55	1.02e-05	0.000135	(A) Metastasis
ESYT3	3q22.3	37 (6.97%)	28 (2.39%)	1.55	1.02e-05	0.000135	(A) Metastasis
MRPL3	3q22.1	37 (6.97%)	28 (2.39%)	1.55	1.02e-05	0.000135	(A) Metastasis
POU5F1B	8q24.21	66 (12.43%)	71 (6.05%)	1.04	1.02e-05	0.000135	(A) Metastasis
TSPAN7	Xp11.4	12 (6.06%)	10 (0.85%)	2.83	1.02e-05	0.000135	(A) Metastasis
GJA10	6q15	25 (4.71%)	128 (10.90%)	-1.21	1.03e-05	0.000136	(B) Primary
TSNARE1	8q24.3	71 (13.37%)	80 (6.75%)	0.99	1.05e-05	0.000138	(A) Metastasis
ZNF286A	17p12	9 (4.55%)	1 (0.15%)	4.95	1.05e-05	0.000139	(A) Metastasis
ADCY5	3q21.1	23 (4.33%)	11 (0.94%)	2.21	1.07e-05	0.000141	(A) Metastasis
ESPNL	2q37.3	23 (4.33%)	11 (0.94%)	2.21	1.07e-05	0.000141	(A) Metastasis
PPEF1	Xp22.13	23 (4.33%)	11 (0.94%)	2.21	1.07e-05	0.000141	(A) Metastasis
SCLY	2q37.3	23 (4.33%)	11 (0.94%)	2.21	1.07e-05	0.000141	(A) Metastasis
SLC38A10	17q25.3	18 (3.39%)	6 (0.51%)	2.73	1.09e-05	0.000144	(A) Metastasis
ABCF3	3q27.1	42 (7.91%)	35 (2.98%)	1.41	1.1e-05	0.000145	(A) Metastasis
EED	11q14.2	34 (1.32%)	14 (0.36%)	1.89	1.1e-05	0.000145	(A) Metastasis
MCHR2	6q16.2	22 (4.14%)	118 (10.05%)	-1.28	1.13e-05	0.000149	(B) Primary
MMS22L	6q16.1	22 (4.14%)	118 (10.05%)	-1.28	1.13e-05	0.000149	(B) Primary
MAOA	Xp11.3	11 (5.56%)	8 (0.68%)	3.03	1.14e-05	0.00015	(A) Metastasis
C7ORF33	7q36.1	29 (5.46%)	18 (1.53%)	1.83	1.15e-05	0.000151	(A) Metastasis
CYFIP2	5q33.3	29 (5.46%)	18 (1.53%)	1.83	1.15e-05	0.000151	(A) Metastasis
APOB	2p24.1	33 (6.21%)	23 (1.96%)	1.67	1.15e-05	0.000151	(A) Metastasis
UBE3C	7q36.3	33 (6.21%)	23 (1.96%)	1.67	1.15e-05	0.000151	(A) Metastasis
FNDC9	5q33.3	19 (3.58%)	7 (0.60%)	2.59	1.15e-05	0.000151	(A) Metastasis
LGALS9C	17p11.2	10 (5.05%)	6 (0.51%)	3.3	1.15e-05	0.000151	(A) Metastasis
PHKA1	Xq13.1	10 (5.05%)	6 (0.51%)	3.3	1.15e-05	0.000151	(A) Metastasis
NKX2-8	14q13.3	7 (0.26%)	11 (2.23%)	-3.11	1.16e-05	0.000151	(B) Primary
CUL7	6p21.1	21 (3.95%)	9 (0.77%)	2.37	1.16e-05	0.000151	(A) Metastasis
GCNT2	6p24.3-p24.2	21 (3.95%)	9 (0.77%)	2.37	1.16e-05	0.000151	(A) Metastasis
NLGN4X	Xp22.32-p22.31	21 (3.95%)	9 (0.77%)	2.37	1.16e-05	0.000151	(A) Metastasis
PSMD1	2q37.1	21 (3.95%)	9 (0.77%)	2.37	1.16e-05	0.000151	(A) Metastasis
C6ORF52	6p24.2	20 (3.77%)	8 (0.68%)	2.47	1.17e-05	0.000152	(A) Metastasis
FBF1	17q25.1	20 (3.77%)	8 (0.68%)	2.47	1.17e-05	0.000152	(A) Metastasis
MAP7D2	Xp22.12	20 (3.77%)	8 (0.68%)	2.47	1.17e-05	0.000152	(A) Metastasis
MARCHF4	2q35	20 (3.77%)	8 (0.68%)	2.47	1.17e-05	0.000152	(A) Metastasis
SLC10A4	4p11	20 (3.77%)	8 (0.68%)	2.47	1.17e-05	0.000152	(A) Metastasis
FOXL2	3q22.3	75 (2.76%)	50 (1.28%)	1.11	1.17e-05	0.000153	(A) Metastasis
TMEM74	8q23.1	60 (11.30%)	62 (5.28%)	1.1	1.19e-05	0.000153	(A) Metastasis
FAM104B	Xp11.21	12 (6.06%)	2 (0.40%)	3.9	1.2e-05	0.000153	(A) Metastasis
LAGE3	Xq28	12 (6.06%)	2 (0.40%)	3.9	1.2e-05	0.000153	(A) Metastasis
PAGE5	Xp11.21	12 (6.06%)	2 (0.40%)	3.9	1.2e-05	0.000153	(A) Metastasis
VPS72	1q21.3	36 (6.78%)	27 (2.30%)	1.56	1.2e-05	0.000153	(A) Metastasis
PLK2	5q11.2	112 (4.12%)	89 (2.27%)	0.86	1.22e-05	0.000153	(A) Metastasis
ADAMTS12	5p13.3-p13.2	27 (5.59%)	18 (1.53%)	1.87	1.24e-05	0.000153	(A) Metastasis
PCNX3	11q13.1	27 (5.59%)	18 (1.53%)	1.87	1.24e-05	0.000153	(A) Metastasis
PIGO	9p13.3	27 (5.59%)	18 (1.53%)	1.87	1.24e-05	0.000153	(A) Metastasis
TMEM254	10q22.3	19 (9.60%)	9 (1.82%)	2.4	1.24e-05	0.000153	(A) Metastasis
BPNT2	8q12.1	46 (8.66%)	41 (3.49%)	1.31	1.25e-05	0.000153	(A) Metastasis
CRIPT	2p21	16 (4.80%)	10 (0.84%)	2.51	1.26e-05	0.000153	(A) Metastasis
RPS4X	Xq13.1	13 (2.45%)	2 (0.17%)	3.85	1.26e-05	0.000153	(A) Metastasis
AADACL2-AS1	3q25.1	0 (0.00%)	6 (1.21%)	<-10	1.28e-05	0.000153	(B) Primary
ACTG1P4	1p21.1	0 (0.00%)	6 (1.21%)	<-10	1.28e-05	0.000153	(B) Primary
ADAMTS9-AS1	3p14.1	0 (0.00%)	6 (1.21%)	<-10	1.28e-05	0.000153	(B) Primary
ADNP-AS1	20q13.13	0 (0.00%)	6 (1.21%)	<-10	1.28e-05	0.000153	(B) Primary
ALDH1L1-AS1	3q21.3	0 (0.00%)	6 (1.21%)	<-10	1.28e-05	0.000153	(B) Primary
AMHR2	12q13.13	0 (0.00%)	6 (1.21%)	<-10	1.28e-05	0.000153	(B) Primary
AMIGO2	12q13.11	0 (0.00%)	6 (1.21%)	<-10	1.28e-05	0.000153	(B) Primary
ATP5MC2	12q13.13	0 (0.00%)	6 (1.21%)	<-10	1.28e-05	0.000153	(B) Primary
BPIFA3	20q11.21	0 (0.00%)	6 (1.21%)	<-10	1.28e-05	0.000153	(B) Primary
BPIFA4P	20q11.21	0 (0.00%)	6 (1.21%)	<-10	1.28e-05	0.000153	(B) Primary
BPIFB2	20q11.21	0 (0.00%)	6 (1.21%)	<-10	1.28e-05	0.000153	(B) Primary
C10ORF71-AS1	10q11.23	0 (0.00%)	6 (1.21%)	<-10	1.28e-05	0.000153	(B) Primary
C12ORF75	12q23.3	0 (0.00%)	6 (1.21%)	<-10	1.28e-05	0.000153	(B) Primary
C20ORF173	20q11.22	0 (0.00%)	6 (1.21%)	<-10	1.28e-05	0.000153	(B) Primary
CACNA2D1-AS1	7q21.11	0 (0.00%)	6 (1.21%)	<-10	1.28e-05	0.000153	(B) Primary
CARD8-AS1	19q13.33	0 (0.00%)	6 (1.21%)	<-10	1.28e-05	0.000153	(B) Primary
CASC18	12q23.3	0 (0.00%)	6 (1.21%)	<-10	1.28e-05	0.000153	(B) Primary
CFAP20DC-AS1	3p14.2	0 (0.00%)	6 (1.21%)	<-10	1.28e-05	0.000153	(B) Primary
CLDN10-AS1	13q32.1	0 (0.00%)	6 (1.21%)	<-10	1.28e-05	0.000153	(B) Primary
CLSTN2-AS1	3q23	0 (0.00%)	6 (1.21%)	<-10	1.28e-05	0.000153	(B) Primary
COPRS	17q11.2	0 (0.00%)	6 (1.21%)	<-10	1.28e-05	0.000153	(B) Primary
CPNE1	20q11.22	0 (0.00%)	6 (1.21%)	<-10	1.28e-05	0.000153	(B) Primary
DAB1-AS1	1p32.2	0 (0.00%)	6 (1.21%)	<-10	1.28e-05	0.000153	(B) Primary
DBH-AS1	9q34.2	0 (0.00%)	6 (1.21%)	<-10	1.28e-05	0.000153	(B) Primary
DEXI	16p13.13	0 (0.00%)	6 (1.21%)	<-10	1.28e-05	0.000153	(B) Primary
DGUOK-AS1	2p13.1	0 (0.00%)	6 (1.21%)	<-10	1.28e-05	0.000153	(B) Primary
DISC1FP1	11q14.3	0 (0.00%)	6 (1.21%)	<-10	1.28e-05	0.000153	(B) Primary
DOCK9-AS1	13q32.3	0 (0.00%)	6 (1.21%)	<-10	1.28e-05	0.000153	(B) Primary
DOCK9-DT	13q32.3	0 (0.00%)	6 (1.21%)	<-10	1.28e-05	0.000153	(B) Primary
DYNLL2-DT	17q22	0 (0.00%)	6 (1.21%)	<-10	1.28e-05	0.000153	(B) Primary
FAM27E2	9p11.2	0 (0.00%)	6 (1.21%)	<-10	1.28e-05	0.000153	(B) Primary
FAM27E3	9q21.11	0 (0.00%)	6 (1.21%)	<-10	1.28e-05	0.000153	(B) Primary
FAM72C	1q21.1	0 (0.00%)	6 (1.21%)	<-10	1.28e-05	0.000153	(B) Primary
FBXL19-AS1	16p11.2	0 (0.00%)	6 (1.21%)	<-10	1.28e-05	0.000153	(B) Primary
FEZF1-AS1	7q31.32	0 (0.00%)	6 (1.21%)	<-10	1.28e-05	0.000153	(B) Primary
FTHL18P		0 (0.00%)	6 (1.21%)	<-10	1.28e-05	0.000153	(B) Primary
GARS1-DT	7p14.3	0 (0.00%)	6 (1.21%)	<-10	1.28e-05	0.000153	(B) Primary
GOLGA8K	15q13.3	0 (0.00%)	6 (1.21%)	<-10	1.28e-05	0.000153	(B) Primary
GOLGA8N	15q13.3	0 (0.00%)	6 (1.21%)	<-10	1.28e-05	0.000153	(B) Primary
GOLGA8O	15q13.3	0 (0.00%)	6 (1.21%)	<-10	1.28e-05	0.000153	(B) Primary
GREM1-AS1	15q13.3	0 (0.00%)	6 (1.21%)	<-10	1.28e-05	0.000153	(B) Primary
GRM7-AS3	3p26.1	0 (0.00%)	6 (1.21%)	<-10	1.28e-05	0.000153	(B) Primary
HAPSTR1		0 (0.00%)	6 (1.21%)	<-10	1.28e-05	0.000153	(B) Primary
IBA57-DT	1q42.13	0 (0.00%)	6 (1.21%)	<-10	1.28e-05	0.000153	(B) Primary
ITPKB-IT1	1q42.12	0 (0.00%)	6 (1.21%)	<-10	1.28e-05	0.000153	(B) Primary
ITPR1-DT	3p26.1	0 (0.00%)	6 (1.21%)	<-10	1.28e-05	0.000153	(B) Primary
JRKL-AS1	11q21	0 (0.00%)	6 (1.21%)	<-10	1.28e-05	0.000153	(B) Primary
KCNAB1-AS1	3q25.31	0 (0.00%)	6 (1.21%)	<-10	1.28e-05	0.000153	(B) Primary
KCNAB1-AS2	3q25.31	0 (0.00%)	6 (1.21%)	<-10	1.28e-05	0.000153	(B) Primary
LCMT1-AS2	16p12.1	0 (0.00%)	6 (1.21%)	<-10	1.28e-05	0.000153	(B) Primary
LINC-ROR	18q21.31	0 (0.00%)	6 (1.21%)	<-10	1.28e-05	0.000153	(B) Primary
LINC00210	1q41	0 (0.00%)	6 (1.21%)	<-10	1.28e-05	0.000153	(B) Primary
LINC00297	13q12.3	0 (0.00%)	6 (1.21%)	<-10	1.28e-05	0.000153	(B) Primary
LINC00359	13q32.1	0 (0.00%)	6 (1.21%)	<-10	1.28e-05	0.000153	(B) Primary
LINC00545	13q12.3	0 (0.00%)	6 (1.21%)	<-10	1.28e-05	0.000153	(B) Primary
LINC00572	13q12.3	0 (0.00%)	6 (1.21%)	<-10	1.28e-05	0.000153	(B) Primary
LINC00601	10q26.2	0 (0.00%)	6 (1.21%)	<-10	1.28e-05	0.000153	(B) Primary
LINC00871	14q21.2	0 (0.00%)	6 (1.21%)	<-10	1.28e-05	0.000153	(B) Primary
LINC00994	3p14.1	0 (0.00%)	6 (1.21%)	<-10	1.28e-05	0.000153	(B) Primary
LINC01007	7q22.1	0 (0.00%)	6 (1.21%)	<-10	1.28e-05	0.000153	(B) Primary
LINC01029	18q23	0 (0.00%)	6 (1.21%)	<-10	1.28e-05	0.000153	(B) Primary
LINC01106	2q13	0 (0.00%)	6 (1.21%)	<-10	1.28e-05	0.000153	(B) Primary
LINC01123	2q13	0 (0.00%)	6 (1.21%)	<-10	1.28e-05	0.000153	(B) Primary
LINC01176	7p14.3	0 (0.00%)	6 (1.21%)	<-10	1.28e-05	0.000153	(B) Primary
LINC01191	2q14.1	0 (0.00%)	6 (1.21%)	<-10	1.28e-05	0.000153	(B) Primary
LINC01232	13q32.3	0 (0.00%)	6 (1.21%)	<-10	1.28e-05	0.000153	(B) Primary
LINC01234	12q24.13	0 (0.00%)	6 (1.21%)	<-10	1.28e-05	0.000153	(B) Primary
LINC01271	20q13.13	0 (0.00%)	6 (1.21%)	<-10	1.28e-05	0.000153	(B) Primary
LINC01273	20q13.13	0 (0.00%)	6 (1.21%)	<-10	1.28e-05	0.000153	(B) Primary
LINC01360	1p31.1	0 (0.00%)	6 (1.21%)	<-10	1.28e-05	0.000153	(B) Primary
LINC01416	18q21.2	0 (0.00%)	6 (1.21%)	<-10	1.28e-05	0.000153	(B) Primary
LINC01422	22q12.1	0 (0.00%)	6 (1.21%)	<-10	1.28e-05	0.000153	(B) Primary
LINC01440	20q13.2	0 (0.00%)	6 (1.21%)	<-10	1.28e-05	0.000153	(B) Primary
LINC01441	20q13.2	0 (0.00%)	6 (1.21%)	<-10	1.28e-05	0.000153	(B) Primary
LINC01505	9q31.2	0 (0.00%)	6 (1.21%)	<-10	1.28e-05	0.000153	(B) Primary
LINC01522	20q13.13	0 (0.00%)	6 (1.21%)	<-10	1.28e-05	0.000153	(B) Primary
LINC01523	20q13.13	0 (0.00%)	6 (1.21%)	<-10	1.28e-05	0.000153	(B) Primary
LINC01653	1q41	0 (0.00%)	6 (1.21%)	<-10	1.28e-05	0.000153	(B) Primary
LINC02256	15q13.3	0 (0.00%)	6 (1.21%)	<-10	1.28e-05	0.000153	(B) Primary
LINC02992		0 (0.00%)	6 (1.21%)	<-10	1.28e-05	0.000153	(B) Primary
LINC03017		0 (0.00%)	6 (1.21%)	<-10	1.28e-05	0.000153	(B) Primary
LOC388282	16q21	0 (0.00%)	6 (1.21%)	<-10	1.28e-05	0.000153	(B) Primary
LOC730183	16p11.2	0 (0.00%)	6 (1.21%)	<-10	1.28e-05	0.000153	(B) Primary
MALINC1	5q31.2	0 (0.00%)	6 (1.21%)	<-10	1.28e-05	0.000153	(B) Primary
MAN1B1-DT	9q34.3	0 (0.00%)	6 (1.21%)	<-10	1.28e-05	0.000153	(B) Primary
MIR4435-2HG	2q13	0 (0.00%)	6 (1.21%)	<-10	1.28e-05	0.000153	(B) Primary
MLF1-DT		0 (0.00%)	6 (1.21%)	<-10	1.28e-05	0.000153	(B) Primary
MTHFD2P1	3q11.2	0 (0.00%)	6 (1.21%)	<-10	1.28e-05	0.000153	(B) Primary
MTUS2-AS1	13q12.3	0 (0.00%)	6 (1.21%)	<-10	1.28e-05	0.000153	(B) Primary
NBPF20	1q21.1	0 (0.00%)	6 (1.21%)	<-10	1.28e-05	0.000153	(B) Primary
NBPF8	1p11.2	0 (0.00%)	6 (1.21%)	<-10	1.28e-05	0.000153	(B) Primary
NCK1-DT	3q22.3	0 (0.00%)	6 (1.21%)	<-10	1.28e-05	0.000153	(B) Primary
NFIA-AS2	1p31.3	0 (0.00%)	6 (1.21%)	<-10	1.28e-05	0.000153	(B) Primary
NPIPA2	16p13.11	0 (0.00%)	6 (1.21%)	<-10	1.28e-05	0.000153	(B) Primary
NPIPA3	16p13.11	0 (0.00%)	6 (1.21%)	<-10	1.28e-05	0.000153	(B) Primary
NPIPA5	16p13.11	0 (0.00%)	6 (1.21%)	<-10	1.28e-05	0.000153	(B) Primary
NPIPA7	16p13.11	0 (0.00%)	6 (1.21%)	<-10	1.28e-05	0.000153	(B) Primary
NPIPB9	16p11.2	0 (0.00%)	6 (1.21%)	<-10	1.28e-05	0.000153	(B) Primary
NUCB1-AS1	19q13.33	0 (0.00%)	6 (1.21%)	<-10	1.28e-05	0.000153	(B) Primary
OBSCN-AS1	1q42.13	0 (0.00%)	6 (1.21%)	<-10	1.28e-05	0.000153	(B) Primary
OR2L5	1q44	0 (0.00%)	6 (1.21%)	<-10	1.28e-05	0.000153	(B) Primary
OVOL1-AS1	11q13.1	0 (0.00%)	6 (1.21%)	<-10	1.28e-05	0.000153	(B) Primary
PCBP2-OT1	12q13.13	0 (0.00%)	6 (1.21%)	<-10	1.28e-05	0.000153	(B) Primary
PCCA-AS1	13q32.3	0 (0.00%)	6 (1.21%)	<-10	1.28e-05	0.000153	(B) Primary
PCDHB1-AS1		0 (0.00%)	6 (1.21%)	<-10	1.28e-05	0.000153	(B) Primary
PELATON	20q13.13	0 (0.00%)	6 (1.21%)	<-10	1.28e-05	0.000153	(B) Primary
PLUT	13q12.2	0 (0.00%)	6 (1.21%)	<-10	1.28e-05	0.000153	(B) Primary
PPP1R26-AS1	9q34.3	0 (0.00%)	6 (1.21%)	<-10	1.28e-05	0.000153	(B) Primary
PRICKLE2-AS1	3p14.1	0 (0.00%)	6 (1.21%)	<-10	1.28e-05	0.000153	(B) Primary
PRICKLE2-AS2	3p14.1	0 (0.00%)	6 (1.21%)	<-10	1.28e-05	0.000153	(B) Primary
PRR13	12q13.13	0 (0.00%)	6 (1.21%)	<-10	1.28e-05	0.000153	(B) Primary
PSMD6-AS2	3p14.1	0 (0.00%)	6 (1.21%)	<-10	1.28e-05	0.000153	(B) Primary
RGS5-AS1	1q23.3	0 (0.00%)	6 (1.21%)	<-10	1.28e-05	0.000153	(B) Primary
RNPC3-DT		0 (0.00%)	6 (1.21%)	<-10	1.28e-05	0.000153	(B) Primary
RNU6-16P	11q14.3	0 (0.00%)	6 (1.21%)	<-10	1.28e-05	0.000153	(B) Primary
SC5D	11q23.3-q24.1	0 (0.00%)	6 (1.21%)	<-10	1.28e-05	0.000153	(B) Primary
SHANK2-AS1	11q13.4	0 (0.00%)	6 (1.21%)	<-10	1.28e-05	0.000153	(B) Primary
SLC26A5-AS1		0 (0.00%)	6 (1.21%)	<-10	1.28e-05	0.000153	(B) Primary
SLC6A1-AS1	3p25.3	0 (0.00%)	6 (1.21%)	<-10	1.28e-05	0.000153	(B) Primary
SLC8A1-AS1	2p22.1	0 (0.00%)	6 (1.21%)	<-10	1.28e-05	0.000153	(B) Primary
SMIM23	5q35.1	0 (0.00%)	6 (1.21%)	<-10	1.28e-05	0.000153	(B) Primary
SNORA30	16p11.2	0 (0.00%)	6 (1.21%)	<-10	1.28e-05	0.000153	(B) Primary
SORCS3-AS1	10q25.1	0 (0.00%)	6 (1.21%)	<-10	1.28e-05	0.000153	(B) Primary
SP7	12q13.13	0 (0.00%)	6 (1.21%)	<-10	1.28e-05	0.000153	(B) Primary
SPAG4	20q11.22	0 (0.00%)	6 (1.21%)	<-10	1.28e-05	0.000153	(B) Primary
SRGAP2D	1q21.1	0 (0.00%)	6 (1.21%)	<-10	1.28e-05	0.000153	(B) Primary
SULT2B1	19q13.33	0 (0.00%)	6 (1.21%)	<-10	1.28e-05	0.000153	(B) Primary
SYNPR-AS1	3p14.2	0 (0.00%)	6 (1.21%)	<-10	1.28e-05	0.000153	(B) Primary
SZRD1P1		0 (0.00%)	6 (1.21%)	<-10	1.28e-05	0.000153	(B) Primary
TAF1A-AS1	1q41	0 (0.00%)	6 (1.21%)	<-10	1.28e-05	0.000153	(B) Primary
TEX36-AS1	10q26.13	0 (0.00%)	6 (1.21%)	<-10	1.28e-05	0.000153	(B) Primary
THOC7-AS1	3p14.1	0 (0.00%)	6 (1.21%)	<-10	1.28e-05	0.000153	(B) Primary
TMED2-DT	12q24.31	0 (0.00%)	6 (1.21%)	<-10	1.28e-05	0.000153	(B) Primary
TMEM210	9q34.3	0 (0.00%)	6 (1.21%)	<-10	1.28e-05	0.000153	(B) Primary
TMEM265	16p11.2	0 (0.00%)	6 (1.21%)	<-10	1.28e-05	0.000153	(B) Primary
TNS2-AS1		0 (0.00%)	6 (1.21%)	<-10	1.28e-05	0.000153	(B) Primary
TP53AIP1	11q24.3	0 (0.00%)	6 (1.21%)	<-10	1.28e-05	0.000153	(B) Primary
TRERNA1	20q13.13	0 (0.00%)	6 (1.21%)	<-10	1.28e-05	0.000153	(B) Primary
UCA1	19p13.12	0 (0.00%)	6 (1.21%)	<-10	1.28e-05	0.000153	(B) Primary
UQCC1	20q11.22	0 (0.00%)	6 (1.21%)	<-10	1.28e-05	0.000153	(B) Primary
XIRP2-AS1	2q24.3	0 (0.00%)	6 (1.21%)	<-10	1.28e-05	0.000153	(B) Primary
ZSWIM9	19q13.33	0 (0.00%)	6 (1.21%)	<-10	1.28e-05	0.000153	(B) Primary
B2M	15q21.1	36 (1.35%)	15 (0.38%)	1.81	1.28e-05	0.000153	(A) Metastasis
AKIRIN2	6q15	25 (4.71%)	127 (10.82%)	-1.2	1.29e-05	0.000153	(B) Primary
SLC35A1	6q15	25 (4.71%)	127 (10.82%)	-1.2	1.29e-05	0.000153	(B) Primary
PARD3	10p11.22-p11.21	27 (5.08%)	16 (1.35%)	1.91	1.29e-05	0.000153	(A) Metastasis
FLAD1	1q21.3	48 (9.04%)	44 (3.75%)	1.27	1.29e-05	0.000154	(A) Metastasis
GALT	9p13.3	23 (4.76%)	13 (1.11%)	2.1	1.3e-05	0.000154	(A) Metastasis
SIGMAR1	9p13.3	23 (4.76%)	13 (1.11%)	2.1	1.3e-05	0.000154	(A) Metastasis
FSTL1	3q13.33	11 (2.07%)	11 (0.28%)	2.88	1.3e-05	0.000154	(A) Metastasis
OC90	8q24.22	60 (11.30%)	63 (5.32%)	1.09	1.33e-05	0.000158	(A) Metastasis
MTRNR2L10	Xp11.21	9 (6.00%)	1 (0.20%)	4.89	1.34e-05	0.000159	(A) Metastasis
SNORA11	Xp11.21	9 (6.00%)	1 (0.20%)	4.89	1.34e-05	0.000159	(A) Metastasis
KIF21B	1q32.1	31 (5.84%)	21 (1.77%)	1.72	1.34e-05	0.000159	(A) Metastasis
GPR87	3q25.1	38 (7.16%)	30 (2.56%)	1.49	1.39e-05	0.000165	(A) Metastasis
PIR	Xp22.2	18 (9.09%)	8 (1.62%)	2.49	1.41e-05	0.000167	(A) Metastasis
S100A11	1q21.3	35 (6.59%)	26 (2.21%)	1.57	1.41e-05	0.000167	(A) Metastasis
CGN	1q21.3	43 (8.10%)	37 (3.15%)	1.36	1.42e-05	0.000168	(A) Metastasis
FUT9	6q16.1	22 (4.14%)	117 (9.97%)	-1.27	1.42e-05	0.000169	(B) Primary
EMC2	8q23.1	59 (11.11%)	61 (5.20%)	1.1	1.44e-05	0.00017	(A) Metastasis
ADAMTS20	12q12	20 (3.77%)	18 (0.90%)	2.06	1.45e-05	0.000171	(A) Metastasis
CLASP1	2q14.2-q14.3	21 (1.38%)	47 (4.00%)	-1.54	1.47e-05	0.000173	(B) Primary
FBXW7	4q31.3	35 (1.29%)	14 (0.36%)	1.85	1.47e-05	0.000173	(A) Metastasis
COX18	4q13.3	27 (5.08%)	16 (1.36%)	1.9	1.47e-05	0.000173	(A) Metastasis
KLHL30	2q37.3	27 (5.08%)	16 (1.36%)	1.9	1.47e-05	0.000173	(A) Metastasis
CRLF2	Xp22.3 and Yp11.3	32 (1.37%)	11 (0.34%)	2.01	1.49e-05	0.000176	(A) Metastasis
JMJD1C-AS1	10q21.3	15 (10.00%)	8 (1.62%)	2.63	1.49e-05	0.000176	(A) Metastasis
UNC5B-AS1	10q22.1	15 (10.00%)	8 (1.62%)	2.63	1.49e-05	0.000176	(A) Metastasis
RB1CC1	8q11.23	45 (8.47%)	40 (3.41%)	1.31	1.5e-05	0.000176	(A) Metastasis
GAB3	Xq28	13 (6.57%)	3 (0.61%)	3.43	1.51e-05	0.000177	(A) Metastasis
ZFP92	Xq28	13 (6.57%)	3 (0.61%)	3.43	1.51e-05	0.000177	(A) Metastasis
MAP3K1	5q11.2	133 (4.89%)	113 (2.88%)	0.77	1.53e-05	0.00018	(A) Metastasis
SRSF3P2	8q22.1	54 (11.18%)	60 (5.11%)	1.13	1.54e-05	0.00018	(A) Metastasis
ACSL4	Xq23	5 (1.04%)	0 (0.00%)	>10	1.54e-05	0.000181	(A) Metastasis
TTPA	8q12.3	47 (8.85%)	43 (3.66%)	1.27	1.55e-05	0.000182	(A) Metastasis
PDK3	Xp22.11	17 (8.59%)	7 (1.42%)	2.6	1.55e-05	0.000182	(A) Metastasis
SETD1B	12q24.31	17 (8.59%)	7 (1.42%)	2.6	1.55e-05	0.000182	(A) Metastasis
CCND2	12p13.32	31 (1.14%)	11 (0.28%)	2.02	1.56e-05	0.000183	(A) Metastasis
CEBPD	8q11.21	40 (7.53%)	33 (2.81%)	1.42	1.56e-05	0.000183	(A) Metastasis
TEX28	Xq28	10 (6.67%)	2 (0.40%)	4.04	1.57e-05	0.000183	(A) Metastasis
DCST2	1q21.3	49 (9.23%)	46 (3.92%)	1.24	1.58e-05	0.000185	(A) Metastasis
DBI	2q14.2	15 (0.99%)	39 (3.32%)	-1.75	1.58e-05	0.000185	(B) Primary
LIPM	10q23.31	82 (15.44%)	100 (8.44%)	0.87	1.59e-05	0.000186	(A) Metastasis
IRS1	2q36.3	45 (1.68%)	23 (0.59%)	1.52	1.6e-05	0.000187	(A) Metastasis
OR2S2	9p13.3	25 (4.71%)	14 (1.18%)	1.99	1.62e-05	0.000189	(A) Metastasis
MUC1	1q22	36 (1.32%)	41 (3.49%)	-1.4	1.64e-05	0.000191	(B) Primary
SNHG5	6q14.3	21 (4.35%)	123 (10.48%)	-1.27	1.64e-05	0.000191	(B) Primary
SNORD50A	6q14.3	21 (4.35%)	123 (10.48%)	-1.27	1.64e-05	0.000191	(B) Primary
SEMA5A	5p15.31	26 (4.90%)	15 (1.28%)	1.94	1.65e-05	0.000192	(A) Metastasis
SVIL	10p11.23	26 (4.90%)	15 (1.28%)	1.94	1.65e-05	0.000192	(A) Metastasis
OR3A3	17p13.2	5 (10.42%)	5 (0.43%)	4.61	1.65e-05	0.000192	(A) Metastasis
LINC01565	3q21.3	37 (6.97%)	29 (2.47%)	1.5	1.65e-05	0.000192	(A) Metastasis
LYSMD1	1q21.3	37 (6.97%)	29 (2.47%)	1.5	1.65e-05	0.000192	(A) Metastasis
RBP3	10q11.22	37 (6.97%)	29 (2.47%)	1.5	1.65e-05	0.000192	(A) Metastasis
PUDP	Xp22.31	16 (8.08%)	6 (1.21%)	2.73	1.67e-05	0.000194	(A) Metastasis
GPR143	Xp22.2	14 (7.07%)	4 (0.81%)	3.13	1.67e-05	0.000194	(A) Metastasis
TBL1X	Xp22.31-p22.2	14 (7.07%)	4 (0.81%)	3.13	1.67e-05	0.000194	(A) Metastasis
VCX3A	Xp22.31	14 (7.07%)	4 (0.81%)	3.13	1.67e-05	0.000194	(A) Metastasis
CNKSR2	Xp22.12	23 (4.33%)	2 (0.40%)	3.42	1.69e-05	0.000196	(A) Metastasis
PTP4A3	8q24.3	70 (13.18%)	80 (6.75%)	0.97	1.69e-05	0.000196	(A) Metastasis
BLOC1S5-TXNDC5	6p24.3	21 (4.35%)	11 (0.94%)	2.21	1.71e-05	0.000198	(A) Metastasis
DCTN3	9p13.3	21 (4.35%)	11 (0.94%)	2.21	1.71e-05	0.000198	(A) Metastasis
NEK10	3p24.1	21 (4.35%)	11 (0.94%)	2.21	1.71e-05	0.000198	(A) Metastasis
PIP5K1P1	6p24.3	21 (4.35%)	11 (0.94%)	2.21	1.71e-05	0.000198	(A) Metastasis
CT47B1	Xq24	15 (7.58%)	5 (1.01%)	2.9	1.72e-05	0.000198	(A) Metastasis
PRLR	5p13.2	20 (4.14%)	10 (0.84%)	2.29	1.74e-05	0.000201	(A) Metastasis
PRKCI	3q26.2	80 (4.12%)	62 (2.04%)	1.01	1.76e-05	0.000204	(A) Metastasis
ZNF280C	Xq26.1	14 (2.64%)	3 (0.26%)	3.37	1.78e-05	0.000206	(A) Metastasis
CLIP2	7q11.23	30 (5.65%)	20 (1.70%)	1.73	1.79e-05	0.000207	(A) Metastasis
NADSYN1	11q13.4	30 (5.65%)	20 (1.70%)	1.73	1.79e-05	0.000207	(A) Metastasis
PF4V1	4q13.3	25 (4.71%)	14 (1.19%)	1.98	1.83e-05	0.000211	(A) Metastasis
CDRT15	17p12	8 (4.04%)	3 (0.26%)	3.98	1.85e-05	0.000213	(A) Metastasis
CHD7	8q12.2	54 (10.17%)	54 (4.60%)	1.14	1.85e-05	0.000213	(A) Metastasis
GGH	8q12.3	46 (8.66%)	42 (3.58%)	1.28	1.86e-05	0.000214	(A) Metastasis
PIK3CD	1p36.22	52 (1.91%)	29 (0.74%)	1.37	1.89e-05	0.000217	(A) Metastasis
SNX14	6q14.3	24 (4.52%)	122 (10.39%)	-1.2	1.93e-05	0.000222	(B) Primary
CAVIN2	2q32.3	20 (4.14%)	10 (0.85%)	2.28	1.93e-05	0.000222	(A) Metastasis
[truncated: 5,020 more rows]
