# Supplementary material for: Integrated Genomic Analysis of Primary Prostate Tumor Foci and Corresponding Lymph Node Metastases Identifies Mutations and Pathways Associated with Metastasis
Source: Preprints.org preprint supplement (doi:10.20944/preprints202310.1586.v1), 2023-10-25
Supplement: Supplementary file 6 [file Table_S1_clinical_metadata.xlsx]

## Sheet: Table_S1_clinical_metadata
PatientID	Race	Pre_biopsy_PSA_(ng/mL)	Bx.Gleason.Sum	RP.Gleason.Sum	Group	Treatments
PCM001	White	31.78	8	9	Met	Androgen Deprivation Therapy (ADT)
PCM002	White	3.3	6	9	Non.Met	Pelvic Node Radiation Therapy,Prostate Bed Radiation Therapy,Androgen Deprivation Therapy (ADT)
PCM003	Asian	10.62	10	9	Met	Pelvic Radiation Therapy,Pelvic Node Radiation Therapy,Prostate Bed Radiation Therapy
PCM004	White	5.41	9	9	Non.Met
PCM005	White	24.7	7	7	Met
PCM006	Unknown	4.2	9	9	Non.Met
PCM007	White	13.7	7	9	Non.Met
PCM008	White	8.6	9	9	Met	Androgen Deprivation Therapy (ADT),Chemotherapy
PCM009	White	24.7	8	8	Met	Pelvic Node Radiation Therapy,Prostate Bed Radiation Therapy,Androgen Deprivation Therapy (ADT)
PCM010	White	5.3	9	9	Met	Pelvic Radiation Therapy
PCM012	White	22.5	7	7	Non.Met
PCM013	AA	97.37	8	9	Met	Pelvic Node Radiation Therapy,Prostate Bed Radiation Therapy,Androgen Deprivation Therapy (ADT)
PCM015	Unknown	6.58	8	7	Non.Met
PCM016	AA	4.7	9	9	Non.Met
PCM021	White	44.5	9	9	Met	Pelvic Node Radiation Therapy,Prostate Bed Radiation Therapy,Androgen Deprivation Therapy (ADT)
PCM022	AA	19.52	7	7	Non.Met
PCM023	White	4.24	0	9	Non.Met	Prostate Bed Radiation Therapy
PCM024	Asian	7.43	8	7	Non.Met
PCM025	White	7.27	8	7	Non.Met	Prostate Bed Radiation Therapy
PCM026	White	2.49	8	7	Non.Met
PCM027	AA	42.74	7	7	Non.Met
PCM029	AA	18.19	8	7	Non.Met
PCM030	AA	60.72	8	9	Non.Met	Pelvic Node Radiation Therapy,Prostate Bed Radiation Therapy
PCM031	AA	6.92	9	7	Non.Met
PCM032	White	16.2	9	9	Met
PCM033	AA	4.92	8	7	Met	Pelvic Node Radiation Therapy,Prostate Bed Radiation Therapy,Androgen Deprivation Therapy (ADT)
PCM034	White	115.85	9	9	Met
PCM035	AA	5.5	8	7	Non.Met
PCM036	AA	19.34	10	9	Non.Met	Pelvic Radiation Therapy
PCM037	White	150.8	8	9	Met
PCM038	White	6	7	9	Met	Androgen Deprivation Therapy (ADT)
PCM039	AA	33.89	8	9	Met
PCM041	White	76.64	9	9	Met	Pelvic Radiation Therapy,Androgen Deprivation Therapy (ADT)
PCM043	AA	9.47	NA	8	Non.Met
PCM044	AA	19.27	9	7	Met	Prostate Bed Radiation Therapy,Androgen Deprivation Therapy (ADT)
PCM045	AA	18.7	8	9	Non.Met
PCM047	White	NA	10	9	Non.Met	Prostate Bed Radiation Therapy,Androgen Deprivation Therapy (ADT)
PCM049	White	64.8	9	9	Met	Pelvic Radiation Therapy,Androgen Deprivation Therapy (ADT)
PCM050	White	23.05	9	9	Met	Androgen Deprivation Therapy (ADT)
PCM051	White	7.3	9	9	Non.Met
PCM053	White	16	10	9	Met
PCM054	Unknown	9.5	7	9	Met	Pelvic Node Radiation Therapy,Prostate Bed Radiation Therapy,Androgen Deprivation Therapy (ADT)
PCM055	Unknown	NA	NA	NA	NA	NA
