# Supplementary material for: Integrated Genomic Analysis of Primary Prostate Tumor Foci and Corresponding Lymph Node Metastases Identifies Mutations and Pathways Associated with Metastasis
Source: Preprints.org preprint supplement (doi:10.20944/preprints202310.1586.v1), 2023-10-25
Supplement: Supplementary file 7 [file Table_S2_RNAseq_sample.metadata.165samples.xlsx]

## Sheet: Table_S2_RNAseq_sample.metadata
SampleID	PatientID	Site	Type	Group	Batch	RNA.total.counts	Class	Clone	Race	RP.Gleason.Sum	Carcinoma Ecotype	CE1	CE2	CE3	CE4	CE5	CE6	CE7	CE8	CE9	CE10
PCM001L1	PCM001	Lymph	Normal	Met	Batch2	9298019	1	NA	White	9	CE10	0.0302753	0.0496804	0.0892623	0.0930887	0.0826162	0.0607917	0.0326801	0.0734351	0.191393	0.296777
PCM001L2	PCM001	Lymph	Metastasis	Met	Batch2	7343554	2	Met	White	9	CE5	0.0330765	0.139199	0.0498042	0.211538	0.250508	0.0169275	0.0144376	0.224484	0.0306554	0.0293708
PCM001P1	PCM001	Prostate	Tumor	Met	Batch2	13240243	2	Met	White	9	NA	0.0384263	0.0135305	0.0119247	0.0244395	0.0878067	0.000281949	0.459883	0.355218	0.00681743	0.00167205
PCM001P3	PCM001	Prostate	Tumor	Met	Batch2	11487206	2	Non.Met	White	9	CE1	0.367832	0.0127827	0.00652462	0.0304673	0.0569933	0.0282843	0.249544	0.24595	0.00134988	0.000271943
PCM001P4	PCM001	Prostate	Tumor	Met	Batch2	9774509	2	Non.Met	White	9	NA	0.0528996	0.196196	0.0346793	0.22916	0.226996	0.0570852	0.00260301	0.169507	0.0138903	0.0169844
PCM002L1	PCM002	Lymph	Normal	Non.Met	Batch1	10119068	1	NA	White	9	CE9	0.0720762	0.00374554	0.104821	0.00207249	0.00481525	0.0712171	0.113798	0.0468363	0.290982	0.289635
PCM002P1	PCM002	Prostate	Tumor	Non.Met	Batch1	2154265	2	Non.Met	White	9	CE1	0.333788	0.123939	0.0630296	0.116678	0.0321593	0.0970868	0.147589	0.0687334	0.0149868	0.00200884
PCM002P3	PCM002	Prostate	Tumor	Non.Met	Batch1	15031514	2	Non.Met	White	9	CE1	0.429982	0.0786562	0.0265508	0.0157024	0.0335249	0.0960025	0.229331	0.0846352	0.0028409	0.0027735
PCM003L1	PCM003	Lymph	Normal	Met	Batch2	11712532	1	NA	Asian	9	CE6	0.19037	0.0250901	0.0400881	0.0259727	0.100461	0.460091	0.0766823	0.0641956	0.0157775	0.0012713
PCM003L2	PCM003	Lymph	Metastasis	Met	Batch2	8123236	2	Met	Asian	9	NA	0.0399775	0.135199	0.0624194	0.179623	0.166838	0.00986088	0.030099	0.153835	0.0772899	0.144859
PCM003P2	PCM003	Prostate	Tumor	Met	Batch2	15386174	2	Met	Asian	9	CE7	0.271104	0.07136	0.0735573	0.0357233	0.0215185	0.0165812	0.299143	0.11618	0.0943267	0.000506202
PCM003P3	PCM003	Prostate	Tumor	Met	Batch2	11421032	2	Met	Asian	9	CE1	0.36408	0.0908432	0.0272442	0.00947654	0.0110718	0.0643787	0.265784	0.108318	0.0570827	0.00172101
PCM003P4	PCM003	Prostate	Tumor	Met	Batch2	7927761	2	NA	Asian	9	NA	0.0728365	0.197033	0.0705809	0.209337	0.205695	0.0715037	0.000511344	0.111481	0.0367725	0.0242489
PCM004L1	PCM004	Lymph	Normal	Non.Met	Batch1	8821661	1	NA	White	9	CE10	0.0854991	0.00836979	0.083401	0.00180164	0.0192637	0.127036	0.07508	0.0468447	0.233119	0.319585
PCM004P1	PCM004	Prostate	Tumor	Non.Met	Batch1	2315700	2	NA	White	9	CE2	0.173299	0.194069	0.0951404	0.138157	0.109502	0.112725	0.0793246	0.0719469	0.0203047	0.00553167
PCM004P3	PCM004	Prostate	Tumor	Non.Met	Batch1	5966703	2	NA	White	9	CE2	0.180393	0.227889	0.0929248	0.105792	0.11775	0.114985	0.0840778	0.0596721	0.0112349	0.00528062
PCM005P1	PCM005	Prostate	Tumor	Non.Met	Batch1	3435872	2	NA	White	7	NA	0.0461323	0.167478	0.0617231	0.225186	0.215004	0.0781777	0.000389113	0.119916	0.0406558	0.0453385
PCM006L1	PCM006	Lymph	Normal	Non.Met	Batch1	10406660	1	NA	Unknown	9	CE10	0.0455526	0.0243044	0.0796268	0.0162246	0.0149251	0.0892447	0.109977	0.0685486	0.240119	0.311478
PCM006P2	PCM006	Prostate	Tumor	Non.Met	Batch1	5618515	2	Non.Met	Unknown	9	CE2	0.0545418	0.203269	0.0636298	0.202172	0.174309	0.0381293	0.0545144	0.164614	0.0260079	0.018813
PCM006P3	PCM006	Prostate	Tumor	Non.Met	Batch1	8039753	2	NA	Unknown	9	NA	0.0618683	0.189255	0.0878724	0.208731	0.203985	0.0866545	0.00123922	0.0862747	0.0334789	0.0406416
PCM007L1	PCM007	Lymph	Normal	Non.Met	Batch1	9868614	1	NA	White	9	CE10	0.077977	0.0109214	0.105098	0.00397362	0.00344134	0.100722	0.0886764	0.0471862	0.251624	0.310379
PCM007P1	PCM007	Prostate	Tumor	Non.Met	Batch1	13411695	2	Non.Met	White	9	CE1	0.427766	0.0616079	0.126741	0.088976	0.00995262	0.128315	0.111758	0.0287465	0.0133452	0.00279188
PCM007P3B	PCM007	Prostate	Tumor	Non.Met	Batch2	15157267	2	Non.Met	White	9	CE1	0.39654	0.0886143	0.172733	0.00988368	0.01668	0.188774	0.0925007	0.0177792	0.0125354	0.00395956
PCM007P4	PCM007	Prostate	Normal	Non.Met	Batch3	6764828	1	NA	White	9	CE1	0.356248	0.144271	0.136705	0.00308091	0.0210569	0.192319	0.123609	0.0133582	0.00622772	0.00312416
PCM008L2	PCM008	Lymph	Normal	Met	Batch2	9815272	1	NA	White	9	CE10	0.0359142	0.100881	0.0955218	0.161676	0.153399	0.0458534	0.000646864	0.0825909	0.125643	0.197874
PCM008L3	PCM008	Lymph	Metastasis	Met	Batch2	10250329	2	Met	White	9	CE5	0.0751887	0.155563	0.0896402	0.160766	0.235784	0.0895696	0.030502	0.135141	0.0163128	0.0115319
PCM008P1	PCM008	Prostate	Tumor	Met	Batch2	16557267	2	Met	White	9	CE1	0.359678	0.0815394	0.070357	0.0183602	0.0539761	0.250194	0.104513	0.0493379	0.0100084	0.00203549
PCM008P2	PCM008	Prostate	Tumor	Met	Batch2	12771505	2	Met	White	9	CE1	0.323118	0.0147789	0.00466885	0.0096205	0.0546561	0.0565807	0.298694	0.228404	0.00948041	1.76e-14
PCM008P4	PCM008	Prostate	Tumor	Met	Batch2	13305670	2	Met	White	9	CE1	0.276465	0.0331661	0.0296	0.0160789	0.12004	0.11188	0.190753	0.211205	0.00963958	0.00117268
PCM009L1	PCM009	Lymph	Normal	Met	Batch2	8491181	1	NA	White	8	CE10	0.0485734	0.0218957	0.109142	0.0258095	0.030116	0.101032	0.0437894	0.0475594	0.249139	0.322944
PCM009L2	PCM009	Lymph	Metastasis	Met	Batch2	6530368	2	NA	White	8	NA	0.0424149	0.154454	0.0656936	0.198357	0.184971	0.0246864	0.00731121	0.124055	0.0850065	0.113051
PCM009P2	PCM009	Prostate	Tumor	Met	Batch2	10071287	2	NA	White	8	CE6	0.219034	0.128083	0.0561775	0.0919801	0.121322	0.262637	0.0338177	0.0692629	0.00632473	0.0113612
PCM009P3	PCM009	Prostate	Tumor	Met	Batch2	9664153	2	NA	White	8	CE1	0.306247	0.0814249	0.0597364	0.060443	0.0764532	0.225803	0.0767013	0.0900234	0.0206763	0.0024915
PCM009P4	PCM009	Prostate	Tumor	Met	Batch2	9011399	2	NA	White	8	CE1	0.45413	0.058786	0.0140005	0.0224919	0.0195877	0.276361	0.0891857	0.0632569	1.77e-14	0.0022001
PCM010L1	PCM010	Lymph	Normal	Met	Batch2	5900604	1	NA	White	9	CE10	0.0393929	0.0866167	0.111495	0.138282	0.11885	0.0363617	0.0106453	0.0770445	0.160563	0.220749
PCM010L2	PCM010	Lymph	Metastasis	Met	Batch2	9975658	2	Met	White	9	CE10	0.0429581	0.081756	0.0767196	0.127066	0.128372	0.00692232	0.00331938	0.0887868	0.178979	0.265121
PCM010P2	PCM010	Prostate	Tumor	Non.Met	Batch1	11697728	2	Met	White	9	CE1	0.43913	0.0367278	0.0200698	0.00922428	0.0197707	0.150975	0.221455	0.0802202	0.0224273	2.24e-14
PCM010P3	PCM010	Prostate	Tumor	Non.Met	Batch1	10472835	2	NA	White	9	CE1	0.376767	0.041236	0.0248644	0.0332113	0.0764345	0.209852	0.154925	0.0760514	0.00582471	0.00083278
PCM010P4	PCM010	Prostate	Tumor	Non.Met	Batch1	8317444	2	Met	White	9	CE1	0.39329	0.0535024	0.0175506	0.0245298	0.0479055	0.227864	0.134271	0.0934675	0.00744643	0.000173464
PCM012L1	PCM012	Lymph	Normal	Non.Met	Batch1	8981514	1	NA	White	7	CE6	0.0730104	0.0642735	0.0928952	0.0890749	0.0703119	0.265342	0.00625227	0.0415002	0.107803	0.189537
PCM012P2	PCM012	Prostate	Tumor	Non.Met	Batch1	19494087	2	Non.Met	White	7	CE7	0.204769	0.0843336	0.0223927	0.0695034	0.0724751	0.125236	0.221951	0.182962	0.01411	0.00226741
PCM012P3	PCM012	Prostate	Tumor	Non.Met	Batch1	10815431	2	NA	White	7	NA	0.062469	0.192091	0.0432658	0.257388	0.179493	0.0995729	0.00365767	0.1277	0.0228342	0.0115293
PCM013P1	PCM013	Prostate	Tumor	Non.Met	Batch1	14892763	2	NA	AA	9	CE6	0.131488	0.17924	0.00686659	0.103998	0.133521	0.214725	0.0971571	0.130098	0.00119052	0.00171628
PCM015L1	PCM015	Lymph	Normal	Non.Met	Batch1	10072908	1	NA	Unknown	7	CE10	0.0992992	0.00717721	0.101173	0.00748142	0.0145424	0.109561	0.0694425	0.0447891	0.24782	0.298714
PCM015P3	PCM015	Prostate	Tumor	Non.Met	Batch1	10377947	2	Non.Met	Unknown	7	NA	0.102558	0.17959	0.0692539	0.194586	0.161712	0.109542	0.0268446	0.105814	0.0289668	0.021133
PCM015P8	PCM015	Prostate	Tumor	Non.Met	Batch2	8273069	2	Non.Met	Unknown	7	CE6	0.156489	0.153343	0.0931342	0.166263	0.128187	0.177078	0.00235058	0.075072	0.0294069	0.018677
PCM016L1	PCM016	Lymph	Normal	Non.Met	Batch1	10992025	1	NA	AA	9	CE6	0.139267	0.0143358	0.0428596	0.0293334	0.0106471	0.337277	0.0418316	0.0283516	0.136607	0.21949
PCM016P1	PCM016	Prostate	Tumor	Non.Met	Batch1	12858247	2	Non.Met	AA	9	CE1	0.411449	0.0663454	2.08e-14	0.00482226	0.0222847	0.22315	0.142497	0.124064	0.00440963	0.000978193
PCM016P3	PCM016	Prostate	Tumor	Non.Met	Batch2	15580364	2	Non.Met	AA	9	CE6	0.317082	0.0390165	0.0348757	0.0336623	0.0555199	0.41035	0.0695316	0.034436	0.00107594	0.00445001
PCM021L1	PCM021	Lymph	Normal	Met	Batch2	11408245	1	NA	White	9	CE10	0.0731867	0.0186237	0.0971576	0.00658563	0.015945	0.0893587	0.0740061	0.0460896	0.222826	0.356221
PCM021L2	PCM021	Lymph	Metastasis	Met	Batch2	11067931	2	Met	White	9	CE8	0.0554467	0.134118	0.0265242	0.187471	0.177036	0.0367298	0.0970953	0.23866	0.0230698	0.0238499
PCM021P1	PCM021	Prostate	Tumor	Met	Batch2	10841245	2	Met	White	9	CE1	0.36753	0.0766794	0.00111237	0.0148323	0.0143182	0.0947487	0.226878	0.201283	0.00189755	0.000720521
PCM021P4	PCM021	Prostate	Tumor	Met	Batch2	11712532	2	NA	White	9	CE1	0.473447	0.0800254	7.44e-11	0.0187154	0.0126862	0.188069	0.100925	0.125737	1.97e-14	0.000395006
PCM021P6	PCM021	Prostate	Tumor	Met	Batch2	11665992	2	Met	White	9	CE1	0.176708	0.171782	0.0410322	0.15468	0.139457	0.0707907	0.0543415	0.156709	0.0222346	0.0122651
PCM022L1	PCM022	Lymph	Normal	Non.Met	Batch2	9131803	1	NA	AA	7	CE10	0.0708811	0.0125919	0.0826573	0.00233577	0.0158038	0.0300292	0.112921	0.0596986	0.26191	0.351171
PCM022P1	PCM022	Prostate	Tumor	Non.Met	Batch1	11044608	2	Non.Met	AA	7	NA	0.0757208	0.155793	0.0569423	0.274755	0.203126	0.0438891	0.00626749	0.128291	0.0281699	0.027045
PCM022P10	PCM022	Prostate	Tumor	Non.Met	Batch2	10203429	2	Non.Met	AA	7	NA	0.106858	0.163213	0.0589494	0.246551	0.17979	0.053065	0.0156234	0.13182	0.0238957	0.0202356
PCM022P2	PCM022	Prostate	Normal	Non.Met	Batch3	5155121	1	NA	AA	7	CE4	0.142933	0.142003	0.0661447	0.230569	0.0863976	0.193057	0.0313746	0.06736	0.022958	0.0172029
PCM023L1	PCM023	Lymph	Normal	Non.Met	Batch1	2773891	1	NA	White	9	CE10	0.054205	0.0602832	0.080861	0.0757608	0.0650861	0.157277	0.0177696	0.0718002	0.164612	0.252345
PCM023P1	PCM023	Prostate	Tumor	Non.Met	Batch1	5829431	2	NA	White	9	NA	0.0454641	0.169361	0.0751922	0.212626	0.211341	0.0925775	0.000323503	0.0946914	0.0412863	0.0571369
PCM023P3	PCM023	Prostate	Tumor	Non.Met	Batch1	7236156	2	NA	White	9	CE2	0.0532336	0.208854	0.0771341	0.19975	0.197967	0.0276394	0.0560475	0.121547	0.0379114	0.0199156
PCM024L1	PCM024	Lymph	Normal	Non.Met	Batch1	2892560	1	NA	Asian	7	CE10	0.0682735	0.0121967	0.0937154	0.00747386	0.0202942	0.0701762	0.10515	0.0693265	0.246768	0.306626
PCM024P1	PCM024	Prostate	Tumor	Non.Met	Batch1	2349486	2	NA	Asian	7	CE5	0.0291223	0.196993	0.0322617	0.209275	0.238712	0.0537626	0.00813909	0.178305	0.0298484	0.0235795
PCM024P2	PCM024	Prostate	Tumor	Non.Met	Batch1	4184476	2	NA	Asian	7	NA	0.254972	0.171776	0.0312053	0.0406319	0.0836015	0.0898962	0.19944	0.100767	0.0229023	0.00480736
PCM025L1	PCM025	Lymph	Normal	Non.Met	Batch1	12062523	1	NA	White	7	CE10	0.059109	0.0113489	0.0840331	0.00350443	0.0266181	0.0874443	0.0871554	0.0567888	0.246418	0.33758
PCM025P1	PCM025	Prostate	Tumor	Non.Met	Batch1	9338083	2	Non.Met	White	7	CE7	0.184773	0.0250155	0.0158333	0.00611068	0.0133633	0.00968424	0.441178	0.227997	0.0748945	0.00115132
PCM025P3	PCM025	Prostate	Tumor	Non.Met	Batch1	9123888	2	NA	White	7	CE5	0.0414805	0.19276	0.0637635	0.216335	0.225759	0.0470484	0.00841251	0.141387	0.0432907	0.0197637
PCM026L1	PCM026	Lymph	Normal	Non.Met	Batch1	9276647	1	NA	White	7	CE6	0.121194	0.0632287	0.100212	0.0792022	0.067123	0.289537	0.0159632	0.0241173	0.0965417	0.14288
PCM026P1	PCM026	Prostate	Tumor	Non.Met	Batch1	10574300	2	Non.Met	White	7	CE6	0.154814	0.159886	0.080974	0.155185	0.151751	0.183695	0.0222111	0.0733935	0.00939145	0.00869843
PCM026P2	PCM026	Prostate	Tumor	Non.Met	Batch1	5084102	2	Non.Met	White	7	NA	0.0517755	0.196913	0.10703	0.208293	0.19507	0.0387751	0.00529939	0.0923467	0.0581597	0.046338
PCM027L1	PCM027	Lymph	Normal	Non.Met	Batch1	12580513	1	NA	AA	7	CE10	0.0706907	0.0194374	0.0986166	0.0151926	0.0106483	0.119895	0.0602728	0.0468318	0.243528	0.314887
PCM027P1	PCM027	Prostate	Tumor	Non.Met	Batch1	12424200	2	Non.Met	AA	7	CE1	0.326956	0.0302601	0.00752241	0.00446168	0.041762	0.131737	0.229089	0.213838	0.0137616	0.00061202
PCM027P3A	PCM027	Prostate	Tumor	Non.Met	Batch1	9469618	2	Non.Met	AA	7	CE1	0.220521	0.177811	2.19e-14	0.0147996	0.0956331	0.172278	0.111132	0.20638	0.000693155	0.000751132
PCM029P1	PCM029	Prostate	Tumor	Non.Met	Batch1	9966355	2	Non.Met	AA	7	CE2	0.106195	0.206048	0.0449917	0.171891	0.132882	0.0514476	0.0570906	0.150354	0.0639243	0.0151758
PCM029P2	PCM029	Prostate	Tumor	Non.Met	Batch1	12263867	2	Non.Met	AA	7	CE8	0.175279	0.101009	0.0289951	0.100673	0.102129	0.0693003	0.166022	0.242489	0.0078299	0.00627373
PCM030L1	PCM030	Lymph	Normal	Non.Met	Batch1	8871228	1	NA	AA	9	CE10	0.0430957	0.0770588	0.102049	0.141458	0.141838	0.0643215	0.00292028	0.0648495	0.14591	0.216499
PCM030P1	PCM030	Prostate	Tumor	Non.Met	Batch1	7498627	2	Non.Met	AA	9	NA	0.182282	0.0379952	0.0169744	0.0365131	0.0273457	0.0397206	0.403277	0.254872	2.64e-14	0.00101998
PCM030P3	PCM030	Prostate	Normal	Non.Met	Batch3	6894272	1	NA	AA	9	CE1	0.340483	0.0842912	0.00745403	0.0207077	0.0160975	0.284678	0.150431	0.0957345	0.000123737	1.87e-14
PCM030P6	PCM030	Prostate	Tumor	Non.Met	Batch1	13117688	2	Non.Met	AA	9	CE4	0.122541	0.105747	0.0127964	0.240912	0.141442	0.193337	0.030386	0.146786	0.00410268	0.00194947
PCM031L1	PCM031	Lymph	Normal	Non.Met	Batch2	8854163	1	NA	AA	7	CE10	0.0533526	0.0280439	0.0792871	0.0367801	0.032833	0.13435	0.0756665	0.0568065	0.211301	0.291579
PCM031P1	PCM031	Prostate	Tumor	Non.Met	Batch2	10222342	2	Non.Met	AA	7	NA	0.250921	0.223443	0.00178437	0.0185981	0.0454492	0.107232	0.23522	0.107451	0.00983649	6.45e-05
PCM031P10	PCM031	Prostate	Tumor	Non.Met	Batch2	10915551	2	Non.Met	AA	7	CE2	0.0521477	0.221896	0.0725589	0.207399	0.191525	0.0495566	0.0101531	0.113886	0.0419096	0.0389681
PCM032L1	PCM032	Lymph	Normal	Met	Batch2	1708176	1	NA	White	9	CE6	0.0841416	0.142495	0.058175	0.144968	0.160513	0.176909	0.00693056	0.0810284	0.0670341	0.0778063
PCM032L2	PCM032	Lymph	Metastasis	Met	Batch1	10351239	2	Met	White	9	CE7	0.0441274	0.0415553	0.0101078	0.0308772	0.0407177	0.000835483	0.276303	0.165511	0.161724	0.228242
PCM032P14	PCM032	Prostate	Tumor	Met	Batch2	1140839	2	Non.Met	White	9	CE2	0.0523983	0.204154	0.0350136	0.203073	0.183179	0.0624	0.0121537	0.175734	0.0397828	0.0321123
PCM032P2	PCM032	Prostate	Tumor	Met	Batch1	1813693	2	Met	White	9	CE1	0.287665	0.0312831	0.0588765	0.179137	0.0249147	0.140229	0.138036	0.10299	0.0304333	0.00643575
PCM032P9	PCM032	Prostate	Tumor	Met	Batch2	8764309	2	Non.Met	White	9	NA	0.0635268	0.180556	0.0803228	0.224663	0.1967	0.0860685	0.000321378	0.0899756	0.0348089	0.0430564
PCM033L1	PCM033	Lymph	Normal	Met	Batch1	12238895	1	NA	AA	7	CE10	0.097223	0.0135185	0.0608655	0.00525059	0.0113158	0.14713	0.0683346	0.0305159	0.264947	0.300899
PCM033L2	PCM033	Lymph	Metastasis	Met	Batch1	12564847	2	Met	AA	7	CE10	0.052911	0.0609044	0.0631594	0.0867085	0.0611044	0.0473429	0.044108	0.057497	0.229957	0.296307
PCM033P10	PCM033	Prostate	Tumor	Met	Batch1	15082973	2	Non.Met	AA	7	CE6	0.156913	0.121031	0.00686463	0.0923081	0.145685	0.252747	0.0710116	0.147402	0.00419457	0.00184206
PCM033P2	PCM033	Prostate	Tumor	Met	Batch1	11418567	2	Met	AA	7	CE8	0.125338	0.181536	0.0164615	0.184224	0.138691	0.0665288	0.0542687	0.193119	0.0329013	0.00693165
PCM033P3	PCM033	Prostate	Normal	Met	Batch3	6458418	1	NA	AA	7	CE6	0.15256	0.189303	0.0252963	0.106628	0.144862	0.216686	0.034997	0.0983923	0.0210484	0.0102266
PCM033P8	PCM033	Prostate	Tumor	Met	Batch1	9002712	2	Non.Met	AA	7	NA	0.0445244	0.184302	0.0524819	0.228903	0.222564	0.0723434	0.000400538	0.121769	0.0336056	0.0391061
PCM034L1	PCM034	Lymph	Normal	Met	Batch1	9165958	1	NA	White	9	CE10	0.0772881	0.0089889	0.0917663	0.00174217	0.00943692	0.0490036	0.0862085	0.0480415	0.283391	0.344133
PCM034L2A	PCM034	Lymph	Metastasis	Met	Batch1	16673589	2	Met	White	9	CE7	0.0153563	0.0224641	2.69e-14	0.00787535	0.0263794	0.00786566	0.536564	0.348644	0.00808553	0.0267657
PCM034L2B	PCM034	Lymph	Metastasis	Met	Batch1	11079614	2	Met	White	9	NA	0.0171521	0.0249026	2.7e-14	0.0103733	0.0185974	0.00707033	0.539054	0.369343	0.0122318	0.00127509
PCM034L2C	PCM034	Lymph	Metastasis	Met	Batch1	13994967	2	Met	White	9	NA	0.0102207	0.0193905	0.000486957	0.0111763	0.0257191	0.0148148	0.509076	0.364016	0.0050918	0.0400081
PCM034P10B	PCM034	Prostate	Tumor	Met	Batch1	8324243	2	Non.Met	White	9	NA	0.0440545	0.195207	0.0406921	0.23414	0.233116	0.0651115	0.000806813	0.154146	0.0128323	0.0198924
PCM034P2	PCM034	Prostate	Tumor	Met	Batch1	13717341	2	Met	White	9	CE7	0.174898	0.0406071	0.00992068	0.00647769	0.0154971	0.0134347	0.461186	0.272334	0.00511607	0.000528696
PCM034P6	PCM034	Prostate	Tumor	Met	Batch1	16119364	2	Met	White	9	CE7	0.117644	0.0419029	0.043232	0.0457241	0.0231362	0.0275487	0.460854	0.234906	0.00463138	0.000420188
PCM035L1	PCM035	Lymph	Normal	Non.Met	Batch1	10907208	1	NA	AA	7	CE10	0.0526604	0.0156153	0.0831346	0.00397283	0.0198164	0.0409094	0.094539	0.0569165	0.290879	0.341557
PCM035P1C	PCM035	Prostate	Tumor	Non.Met	Batch1	7715724	2	Non.Met	AA	7	CE5	0.0454555	0.168397	0.0796705	0.212914	0.216593	0.0353655	0.00131542	0.118251	0.0687322	0.0533076
PCM035P3	PCM035	Prostate	Tumor	Non.Met	Batch1	14350281	2	Non.Met	AA	7	CE7	0.168144	0.102513	0.0374226	0.0409499	0.089535	0.0273599	0.269263	0.138481	0.11197	0.0143615
PCM036L1	PCM036	Lymph	Normal	Non.Met	Batch2	5440993	1	NA	AA	9	NA	0.0452303	0.11269	0.11777	0.162082	0.152456	0.0830789	0.000431189	0.0662156	0.114985	0.145062
PCM036P2	PCM036	Prostate	Tumor	Non.Met	Batch1	11639767	2	Non.Met	AA	9	CE1	0.348561	0.0974226	0.0100159	0.0133409	0.0310715	0.162018	0.166999	0.168935	0.00163539	2.77e-14
PCM036P3	PCM036	Prostate	Tumor	Non.Met	Batch2	10571662	2	Non.Met	AA	9	CE1	0.331972	0.131459	0.00246401	0.0167094	0.0390614	0.208111	0.119035	0.150178	2.11e-14	0.00101018
PCM036P4	PCM036	Prostate	Normal	Non.Met	Batch3	4730294	1	NA	AA	9	CE5	0.0536608	0.198814	0.0581827	0.211508	0.211854	0.104134	0.000344775	0.102063	0.0275419	0.0318956
PCM037L1	PCM037	Lymph	Normal	Met	Batch1	7498950	1	NA	White	9	CE10	0.0918362	0.0116937	0.0761242	0.00764253	0.00627857	0.14477	0.091548	0.0431825	0.240348	0.286576
PCM037L2	PCM037	Lymph	Metastasis	Met	Batch1	5690572	2	Met	White	9	CE5	0.0361368	0.149644	0.070547	0.212282	0.219012	0.0296346	0.00227539	0.136891	0.0581263	0.0854517
PCM037P2	PCM037	Prostate	Tumor	Met	Batch1	15412668	2	Met	White	9	CE1	0.244012	0.064353	0.0310383	0.0554952	0.0825372	0.0303032	0.215154	0.22753	0.0467683	0.00280856
PCM037P3	PCM037	Prostate	Tumor	Met	Batch1	13488005	2	Met	White	9	CE7	0.301086	0.0301892	0.00948367	0.0130754	0.0129661	0.0276771	0.347871	0.253753	0.00389844	2.49e-14
PCM038L1	PCM038	Lymph	Metastasis	Met	Batch1	10070488	2	Met	White	9	CE10	0.0849724	0.00701071	0.0903456	0.00936215	0.0114841	0.0710539	0.084161	0.0529841	0.272701	0.315925
PCM038L2	PCM038	Lymph	Normal	Met	Batch1	7519439	1	NA	White	9	CE10	0.0337862	0.0958864	0.101481	0.147069	0.128276	0.0801489	0.00109909	0.0719973	0.13674	0.203516
PCM038P1	PCM038	Prostate	Tumor	Met	Batch1	12772210	2	NA	White	9	NA	0.148209	0.246378	3.01e-14	0.0272593	0.0474546	0.1632	0.154496	0.21012	0.00240998	0.000473312
PCM038P2	PCM038	Prostate	Normal	Met	Batch3	4208832	1	NA	White	9	NA	0.0410341	0.201071	0.0622377	0.215537	0.208081	0.063728	0.00189896	0.118347	0.0380075	0.0500574
PCM038P3	PCM038	Prostate	Tumor	Met	Batch1	13822868	2	Met	White	9	CE1	0.322374	0.0420198	0.00863172	0.00812226	0.0440665	0.142975	0.203925	0.150726	0.0702874	0.00687359
PCM038P4	PCM038	Prostate	Tumor	Met	Batch1	15174615	2	Non.Met	White	9	CE6	0.222603	0.136185	0.00895671	0.0327277	0.0884618	0.329007	0.0596597	0.117764	0.000479812	0.00415642
PCM039L1	PCM039	Lymph	Normal	Met	Batch1	4941193	1	NA	AA	9	CE6	0.0785884	0.0812466	0.0842372	0.105048	0.0711148	0.249162	0.0107828	0.0488187	0.105846	0.165156
PCM039L2	PCM039	Lymph	Metastasis	Met	Batch1	8184943	2	Met	AA	9	CE10	0.061209	0.0223667	0.0689284	0.010913	0.0280626	0.0306412	0.0802799	0.0580232	0.261168	0.378408
PCM039P1	PCM039	Prostate	Tumor	Met	Batch1	14181802	2	Met	AA	9	CE4	0.159374	0.054828	0.0436478	0.301756	0.0811674	0.23647	0.0490162	0.0604374	0.0127733	0.000529945
PCM039P2	PCM039	Prostate	Tumor	Met	Batch1	12360991	2	Met	AA	9	CE7	0.0991919	0.00685625	0.00658593	0.00668025	0.14642	0.00882554	0.393795	0.327594	0.0010402	0.00301076
PCM039P3	PCM039	Prostate	Normal	Met	Batch3	5640841	1	NA	AA	9	NA	0.0488348	0.18585	0.0648022	0.210166	0.206212	0.103081	0.000415221	0.0968745	0.034665	0.0490995
PCM039P4	PCM039	Prostate	Tumor	Met	Batch1	13411832	2	Met	AA	9	CE1	0.412773	0.0301937	0.0811622	0.0135592	0.0729884	0.138576	0.149824	0.0902815	0.00851702	0.00212441
PCM041L1	PCM041	Lymph	Normal	Met	Batch1	9941341	1	NA	White	9	CE10	0.0381544	0.0722648	0.0912296	0.128325	0.135293	0.023184	0.0117566	0.0707591	0.16772	0.261314
PCM041L2	PCM041	Lymph	Metastasis	Met	Batch1	9207758	2	Met	White	9	CE10	0.0312725	0.10363	0.0805888	0.1715	0.161531	0.0269478	0.00606678	0.100605	0.123424	0.194435
PCM041P1	PCM041	Prostate	Tumor	Met	Batch1	13631438	2	Met	White	9	CE7	0.22637	0.0113596	0.0318816	0.00758696	0.0284711	0.0110284	0.400899	0.256855	0.0217429	0.00380582
PCM041P3	PCM041	Prostate	Tumor	Met	Batch1	13185640	2	Met	White	9	CE8	0.189307	0.108414	0.0421886	0.067478	0.104164	0.0217812	0.22646	0.227552	0.00936277	0.00329311
PCM041P4	PCM041	Prostate	Tumor	Met	Batch1	14538728	2	Met	White	9	NA	0.113695	0.0317878	0.0248651	0.0210696	0.0567067	0.00936232	0.386852	0.341148	0.00770995	0.0068038
PCM043L1	PCM043	Lymph	Normal	Non.Met	Batch2	9221830	1	NA	AA	8	CE10	0.086027	0.000332402	0.0772777	0.000891881	0.0100576	0.0638765	0.133263	0.0517658	0.249955	0.326553
PCM043P2	PCM043	Prostate	Tumor	Non.Met	Batch2	9725931	2	Non.Met	AA	8	CE7	0.175093	0.0579253	0.00527538	0.0110414	0.0194312	0.00957902	0.462928	0.234435	0.0188411	0.00545135
PCM043P3	PCM043	Prostate	Normal	Non.Met	Batch3	8199416	1	NA	AA	8	CE4	0.137394	0.137025	0.0473444	0.233121	0.0952619	0.184411	0.0626342	0.073289	0.0144266	0.0150929
PCM043P9	PCM043	Prostate	Tumor	Non.Met	Batch2	11065631	2	Non.Met	AA	8	NA	0.0624462	0.190591	0.0485598	0.22227	0.196934	0.0219792	0.0117347	0.171725	0.0448606	0.0288989
PCM044L1	PCM044	Lymph	Normal	Met	Batch2	8064815	1	NA	AA	7	CE10	0.0411458	0.107522	0.0941865	0.159817	0.135337	0.0394913	0.00390042	0.0826497	0.138475	0.197475
PCM044L6	PCM044	Lymph	Metastasis	Met	Batch2	8848300	2	Met	AA	7	CE10	0.0407534	0.108427	0.0726587	0.149445	0.13128	0.0178178	0.00556484	0.100342	0.14464	0.22907
PCM044P1B	PCM044	Prostate	Tumor	Met	Batch2	15724553	2	Met	AA	7	CE1	0.289225	0.113684	0.0137609	0.0329879	0.0611665	0.205792	0.154987	0.0928341	0.0177479	0.017814
PCM044P3	PCM044	Prostate	Tumor	Met	Batch2	11927601	2	Met	AA	7	CE1	0.187208	0.146031	0.0296135	0.152613	0.177648	0.141326	0.0256504	0.114135	0.0179773	0.00779758
PCM044P4	PCM044	Prostate	Tumor	Met	Batch2	11009030	2	Met	AA	7	CE5	0.129795	0.169184	0.018921	0.184946	0.204857	0.108653	0.0141006	0.143153	0.0152884	0.0111011
PCM045L1	PCM045	Lymph	Normal	Non.Met	Batch2	5717358	1	NA	AA	9	NA	0.0383709	0.13805	0.0898955	0.186001	0.181067	0.0438777	0.000581072	0.0955596	0.0835987	0.142999
PCM045P2	PCM045	Prostate	Tumor	Non.Met	Batch2	6246722	2	Non.Met	AA	9	CE8	0.0398626	0.160169	0.0295572	0.190735	0.195013	0.0225294	0.102258	0.237326	0.0197534	0.00279713
PCM045P3	PCM045	Prostate	Tumor	Non.Met	Batch2	8573861	2	Non.Met	AA	9	NA	0.044349	0.167624	0.0689536	0.250773	0.203736	0.0612428	0.00140701	0.12257	0.0358521	0.0434929
PCM047L1	PCM047	Lymph	Normal	Non.Met	Batch2	6331494	1	NA	White	9	CE10	0.0336395	0.114506	0.0927256	0.17551	0.159428	0.0567367	0.00035411	0.0789568	0.111206	0.176939
PCM047P1	PCM047	Prostate	Tumor	Non.Met	Batch2	10245910	2	Non.Met	White	9	CE10	0.0887397	0.128038	0.127854	0.0664645	0.0724756	0.0579043	0.054078	0.0375816	0.163572	0.203293
PCM047P2	PCM047	Prostate	Tumor	Non.Met	Batch2	5786432	2	Non.Met	White	9	NA	0.0722477	0.186484	0.0381492	0.218937	0.218596	0.0502926	0.0130619	0.140177	0.0354163	0.0266374
PCM049P4	PCM049	Prostate	Normal	Met	Batch3	9666423	1	NA	White	9	CE1	0.350529	0.0437517	0.116758	0.00250341	0.0281256	0.279337	0.131786	0.0216629	0.0173707	0.0081748
PCM050L1	PCM050	Lymph	Normal	Met	Batch2	7193911	1	NA	White	9	NA	0.0369146	0.124973	0.0933335	0.177789	0.173951	0.053	0.00111692	0.0842786	0.101342	0.153301
PCM050L7	PCM050	Lymph	Metastasis	Met	Batch2	13874999	2	Met	White	9	CE10	0.0383873	0.000129646	0.0119391	0.00102441	0.0182561	0.0041279	0.159806	0.145752	0.272291	0.348286
PCM050P1	PCM050	Prostate	Tumor	Met	Batch2	15707122	2	Met	White	9	CE7	0.272922	0.00607781	0.00167192	0.00487017	0.0370006	0.0370647	0.385557	0.212503	0.0376741	0.00465963
PCM050P2	PCM050	Prostate	Normal	Met	Batch3	11602664	1	NA	White	9	CE7	0.187652	0.0110766	0.00277432	0.00538474	0.0211698	0.00762413	0.477315	0.24882	0.0377702	0.000413781
PCM050P3	PCM050	Prostate	Tumor	Met	Batch2	10472842	2	Met	White	9	CE5	0.0967032	0.157431	0.0420031	0.17947	0.196753	0.0189716	0.0534335	0.142611	0.087333	0.0252901
PCM050P4	PCM050	Prostate	Tumor	Met	Batch2	11639865	2	Met	White	9	CE5	0.0842346	0.164843	0.0418824	0.185141	0.186889	0.021278	0.0443372	0.146953	0.084838	0.0396043
PCM051L1	PCM051	Lymph	Normal	Non.Met	Batch2	5805657	1	NA	White	9	NA	0.0324552	0.100762	0.0807282	0.248958	0.122666	0.0521001	0.0025459	0.0634879	0.119189	0.177109
PCM051P2	PCM051	Prostate	Tumor	Non.Met	Batch2	10063408	2	Non.Met	White	9	CE2	0.141174	0.208488	0.0530538	0.157039	0.138113	0.120102	0.041541	0.118738	0.0164081	0.00534397
PCM051P3B	PCM051	Prostate	Tumor	Non.Met	Batch2	10931638	2	Non.Met	White	9	CE1	0.375932	0.0900065	0.246433	0.00968544	0.00259616	0.15598	0.056612	0.00604729	0.0465568	0.0101508
PCM053L1	PCM053	Lymph	Normal	Met	Batch2	6556658	1	NA	White	9	CE10	0.0934782	0.0106493	0.0929952	0.00564186	0.00764854	0.0808024	0.094438	0.0407796	0.280318	0.293249
PCM053L2	PCM053	Lymph	Metastasis	Met	Batch2	8229663	2	Met	White	9	CE9	0.124895	0.0097402	0.0481216	0.00892677	0.0189103	0.00359896	0.0843138	0.0798775	0.315384	0.306232
PCM053P3	PCM053	Prostate	Tumor	Met	Batch2	9211456	2	NA	White	9	CE7	0.093846	0.14659	0.0322825	0.15659	0.170279	0.039243	0.189301	0.151701	0.0153999	0.00476786
PCM053P4	PCM053	Prostate	Tumor	Met	Batch2	5671102	2	NA	White	9	CE5	0.0645509	0.16247	0.0156602	0.182893	0.219156	0.0722874	0.0981059	0.16826	0.0122176	0.00439961
PCM054L1	PCM054	Lymph	Normal	Met	Batch2	5725745	1	NA	Unknown	9	NA	0.0352759	0.120285	0.100284	0.179274	0.165062	0.0467705	0.000441191	0.0775088	0.109313	0.165784
PCM054L11	PCM054	Lymph	Metastasis	Met	Batch2	11931836	2	Met	Unknown	9	CE10	0.0465862	0.108973	0.055716	0.132934	0.113486	0.00826737	0.011398	0.10379	0.153656	0.265194
PCM054P1	PCM054	Prostate	Tumor	Met	Batch2	10259202	2	Met	Unknown	9	CE1	0.445013	0.0609277	0.000652945	0.0269421	0.0243955	0.0768369	0.252405	0.0995696	0.0110632	0.00219456
PCM054P3	PCM054	Prostate	Tumor	Met	Batch2	13126585	2	Met	Unknown	9	NA	0.0997119	0.1873	0.0331986	0.193444	0.172195	0.141266	0.0283059	0.122628	0.0112385	0.0107132
PCM054P4	PCM054	Prostate	Tumor	Met	Batch2	11971718	2	Met	Unknown	9	CE1	0.454127	0.0552279	0.00356545	0.0250626	0.0113476	0.103786	0.20425	0.13659	0.00504888	0.000993686
PCM055L1	PCM055	Lymph	Normal	Non.Met	Batch2	8859885	1	NA	Unknown	NA	CE10	0.0838614	0.0212204	0.118565	0.0101572	0.0122061	0.0896214	0.0831225	0.0375385	0.265557	0.27815
PCM055P1	PCM055	Prostate	Tumor	Non.Met	Batch2	6647909	2	Non.Met	Unknown	NA	CE5	0.0394857	0.176199	0.0647361	0.219452	0.229736	0.0303152	0.00889775	0.142553	0.0511274	0.037498
PCM055P2	PCM055	Prostate	Tumor	Non.Met	Batch2	8710768	2	Non.Met	Unknown	NA	CE8	0.0638883	0.189644	0.0237167	0.175522	0.151061	0.0116374	0.137502	0.200911	0.0392316	0.00688636
