# Supplementary material for: Integrated Genomic Analysis of Primary Prostate Tumor Foci and Corresponding Lymph Node Metastases Identifies Mutations and Pathways Associated with Metastasis
Source: Preprints.org preprint supplement (doi:10.20944/preprints202310.1586.v1), 2023-10-25
Supplement: Supplementary file 8 [file Table_S4_WES_metadata.xlsx]

## Sheet: Table_S4_WES_metadata
Tumor_Sample_Barcode	Matched_Norm_Sample_Barcode	patient_id	Site	Type	Group	Batch	Clone	Race	RP.Gleason.Sum
PCM001L2	PCM001L5	PCM001	Lymph	Metastasis	Met	Batch1	Met	White	9
PCM001P1	PCM001L5	PCM001	Primary	Tumor	Met	Batch1	Met	White	9
PCM001P3	PCM001L5	PCM001	Primary	Tumor	Met	Batch1	Non.Met	White	9
PCM001P4	PCM001L5	PCM001	Primary	Tumor	Met	Batch1	Non.Met	White	9
PCM002P1	PCM002L1	PCM002	Primary	Tumor	Non.Met	Batch1	Non.Met	White	9
PCM002P3	PCM002L1	PCM002	Primary	Tumor	Non.Met	Batch1	Non.Met	White	9
PCM003L2	PCM003L1	PCM003	Lymph	Metastasis	Met	Batch2	Met	Asian	9
PCM003P2	PCM003L1	PCM003	Primary	Tumor	Met	Batch2	Met	Asian	9
PCM003P3	PCM003L1	PCM003	Primary	Tumor	Met	Batch2	Met	Asian	9
PCM003P6	PCM003L1	PCM003	Primary	Tumor	Met	Batch3	Met	Asian	9
PCM006P2	PCM006L1	PCM006	Primary	Tumor	Non.Met	Batch1	Non.Met	White	9
PCM006P5	PCM006L1	PCM006	Primary	Tumor	Non.Met	Batch3	Non.Met	White	9
PCM007P1	PCM007L1	PCM007	Primary	Tumor	Non.Met	Batch1	Non.Met	White	9
PCM007P3B	PCM007L1	PCM007	Primary	Tumor	Non.Met	Batch1	Non.Met	White	9
PCM008L3	PCM008L2	PCM008	Lymph	Metastasis	Met	Batch1	Met	White	9
PCM008P1	PCM008L2	PCM008	Primary	Tumor	Met	Batch1	Met	White	9
PCM008P2	PCM008L2	PCM008	Primary	Tumor	Met	Batch1	Met	White	9
PCM008P4	PCM008L2	PCM008	Primary	Tumor	Met	Batch1	Met	White	9
PCM010L2	PCM010L1	PCM010	Lymph	Metastasis	Met	Batch2	Met	White	9
PCM010P1	PCM010L1	PCM010	Primary	Tumor	Met	Batch3	Met	White	9
PCM010P2	PCM010L1	PCM010	Primary	Tumor	Met	Batch2	Met	White	9
PCM010P4	PCM010L1	PCM010	Primary	Tumor	Met	Batch2	Met	White	9
PCM012P2	PCM012L1	PCM012	Primary	Tumor	Non.Met	Batch1	Non.Met	White	7
PCM012P4	PCM012L1	PCM012	Primary	Tumor	Non.Met	Batch1	Non.Met	White	7
PCM015P3	PCM015L1	PCM015	Primary	Tumor	Non.Met	Batch2	Non.Met	White	7
PCM015P8	PCM015L1	PCM015	Primary	Tumor	Non.Met	Batch2	Non.Met	White	7
PCM016P1	PCM016L1	PCM016	Primary	Tumor	Non.Met	Batch1	Non.Met	AA	9
PCM016P3	PCM016L1	PCM016	Primary	Tumor	Non.Met	Batch1	Non.Met	AA	9
PCM021L2	PCM021L1	PCM021	Lymph	Metastasis	Met	Batch2	Met	White	9
PCM021P1	PCM021L1	PCM021	Primary	Tumor	Met	Batch2	Met	White	9
PCM021P10B	PCM021L1	PCM021	Primary	Tumor	Met	Batch3	Met	White	9
PCM021P6	PCM021L1	PCM021	Primary	Tumor	Met	Batch2	Met	White	9
PCM022P1	PCM022L3	PCM022	Primary	Tumor	Non.Met	Batch2	Non.Met	AA	7
PCM022P10	PCM022L3	PCM022	Primary	Tumor	Non.Met	Batch2	Non.Met	AA	7
PCM025P1	PCM025L1	PCM025	Primary	Tumor	Non.Met	Batch1	Non.Met	White	7
PCM025P2	PCM025L1	PCM025	Primary	Tumor	Non.Met	Batch3	Non.Met	White	7
PCM026P1	PCM026L2	PCM026	Primary	Tumor	Non.Met	Batch2	Non.Met	White	7
PCM026P2	PCM026L2	PCM026	Primary	Tumor	Non.Met	Batch2	Non.Met	White	7
PCM027P1	PCM027L1	PCM027	Primary	Tumor	Non.Met	Batch1	Non.Met	AA	7
PCM027P3A	PCM027L1	PCM027	Primary	Tumor	Non.Met	Batch1	Non.Met	AA	7
PCM029P1	PCM029L1	PCM029	Primary	Tumor	Non.Met	Batch1	Non.Met	AA	7
PCM029P2	PCM029L1	PCM029	Primary	Tumor	Non.Met	Batch1	Non.Met	AA	7
PCM030P1	PCM030L1	PCM030	Primary	Tumor	Non.Met	Batch1	Non.Met	AA	9
PCM030P6	PCM030L1	PCM030	Primary	Tumor	Non.Met	Batch1	Non.Met	AA	9
PCM031P1	PCM031L1	PCM031	Primary	Tumor	Non.Met	Batch2	Non.Met	AA	7
PCM031P10	PCM031L1	PCM031	Primary	Tumor	Non.Met	Batch2	Non.Met	AA	7
PCM032L2	PCM032L1	PCM032	Lymph	Metastasis	Met	Batch1	Met	White	9
PCM032P14	PCM032L1	PCM032	Primary	Tumor	Met	Batch1	Non.Met	White	9
PCM032P2	PCM032L1	PCM032	Primary	Tumor	Met	Batch1	Met	White	9
PCM032P9	PCM032L1	PCM032	Primary	Tumor	Met	Batch1	Non.Met	White	9
PCM033L2	PCM033L1	PCM033	Lymph	Metastasis	Met	Batch1	Met	AA	7
PCM033P10	PCM033L1	PCM033	Primary	Tumor	Met	Batch1	Non.Met	AA	7
PCM033P2	PCM033L1	PCM033	Primary	Tumor	Met	Batch1	Met	AA	7
PCM033P8	PCM033L1	PCM033	Primary	Tumor	Met	Batch1	Non.Met	AA	7
PCM034L2A	PCM034L1	PCM034	Lymph	Metastasis	Met	Batch1	Met	White	9
PCM034L2B	PCM034L1	PCM034	Lymph	Metastasis	Met	Batch1	Met	White	9
PCM034L2C	PCM034L1	PCM034	Lymph	Metastasis	Met	Batch1	Met	White	9
PCM034P10B	PCM034L1	PCM034	Primary	Tumor	Met	Batch2	Non.Met	White	9
PCM034P2	PCM034L1	PCM034	Primary	Tumor	Met	Batch1	Met	White	9
PCM034P6	PCM034L1	PCM034	Primary	Tumor	Met	Batch1	Met	White	9
PCM035P1C	PCM035L1	PCM035	Primary	Tumor	Non.Met	Batch1	Non.Met	AA	7
PCM035P3	PCM035L1	PCM035	Primary	Tumor	Non.Met	Batch1	Non.Met	AA	7
PCM036P2	PCM036L1	PCM036	Primary	Tumor	Non.Met	Batch1	Non.Met	AA	9
PCM036P3	PCM036L1	PCM036	Primary	Tumor	Non.Met	Batch1	Non.Met	AA	9
PCM037L2	PCM037L1	PCM037	Lymph	Metastasis	Met	Batch1	Met	White	9
PCM037P2	PCM037L1	PCM037	Primary	Tumor	Met	Batch1	Met	White	9
PCM037P3	PCM037L1	PCM037	Primary	Tumor	Met	Batch1	Met	White	9
PCM037P4	PCM037L1	PCM037	Primary	Tumor	Met	Batch1	Met	White	9
PCM038L1	PCM038L2	PCM038	Lymph	Metastasis	Met	Batch2	Met	White	9
PCM038P3	PCM038L2	PCM038	Primary	Tumor	Met	Batch2	Met	White	9
PCM038P4	PCM038L2	PCM038	Primary	Tumor	Met	Batch2	Non.Met	White	9
PCM038P6	PCM038L2	PCM038	Primary	Tumor	Met	Batch3	Met	White	9
PCM039L2	PCM039L1	PCM039	Lymph	Metastasis	Met	Batch1	Met	AA	9
PCM039P1	PCM039L1	PCM039	Primary	Tumor	Met	Batch1	Met	AA	9
PCM039P2	PCM039L1	PCM039	Primary	Tumor	Met	Batch1	Met	AA	9
PCM039P4	PCM039L1	PCM039	Primary	Tumor	Met	Batch1	Met	AA	9
PCM041L2	PCM041L1	PCM041	Lymph	Metastasis	Met	Batch1	Met	White	9
PCM041P1	PCM041L1	PCM041	Primary	Tumor	Met	Batch1	Met	White	9
PCM041P3	PCM041L1	PCM041	Primary	Tumor	Met	Batch1	Met	White	9
PCM041P4	PCM041L1	PCM041	Primary	Tumor	Met	Batch1	Met	White	9
PCM043P2	PCM043L1	PCM043	Primary	Tumor	Non.Met	Batch2	Non.Met	AA	8
PCM043P9	PCM043L1	PCM043	Primary	Tumor	Non.Met	Batch2	Non.Met	AA	8
PCM044L6	PCM044L1	PCM044	Lymph	Metastasis	Met	Batch2	Met	AA	7
PCM044P1B	PCM044L1	PCM044	Primary	Tumor	Met	Batch2	Met	AA	7
PCM044P3	PCM044L1	PCM044	Primary	Tumor	Met	Batch2	Met	AA	7
PCM044P4	PCM044L1	PCM044	Primary	Tumor	Met	Batch2	Met	AA	7
PCM045P2	PCM045L1	PCM045	Primary	Tumor	Non.Met	Batch2	Non.Met	AA	9
PCM045P3	PCM045L1	PCM045	Primary	Tumor	Non.Met	Batch2	Non.Met	AA	9
PCM047P1	PCM047L1	PCM047	Primary	Tumor	Non.Met	Batch2	Non.Met	White	9
PCM047P2	PCM047L1	PCM047	Primary	Tumor	Non.Met	Batch2	Non.Met	White	9
PCM050L7	PCM050L1	PCM050	Lymph	Metastasis	Met	Batch2	Met	White	9
PCM050P1	PCM050L1	PCM050	Primary	Tumor	Met	Batch2	Met	White	9
PCM050P3	PCM050L1	PCM050	Primary	Tumor	Met	Batch2	Met	White	9
PCM050P4	PCM050L1	PCM050	Primary	Tumor	Met	Batch2	Met	White	9
PCM051P2	PCM051L1	PCM051	Primary	Tumor	Non.Met	Batch2	Non.Met	White	9
PCM051P3B	PCM051L1	PCM051	Primary	Tumor	Non.Met	Batch2	Non.Met	White	9
PCM054L11	PCM054L1	PCM054	Lymph	Metastasis	Met	Batch2	Met	White	9
PCM054P1	PCM054L1	PCM054	Primary	Tumor	Met	Batch2	Met	White	9
PCM054P3	PCM054L1	PCM054	Primary	Tumor	Met	Batch2	Met	White	9
PCM054P4	PCM054L1	PCM054	Primary	Tumor	Met	Batch2	Met	White	9
PCM055P1	PCM055L1	PCM055	Primary	Tumor	Non.Met	Batch1	Non.Met	NA	NA
PCM055P2	PCM055L1	PCM055	Primary	Tumor	Non.Met	Batch1	Non.Met	NA	NA
