# Supplementary material for: Integrated Genomic Analysis of Primary Prostate Tumor Foci and Corresponding Lymph Node Metastases Identifies Mutations and Pathways Associated with Metastasis
Source: Preprints.org preprint supplement (doi:10.20944/preprints202310.1586.v1), 2023-10-25
Supplement: Supplementary file 9 [file Table_S7_N.v.PTF.ML.sig.05.trend.xlsx]

## Sheet: Table_S7_N.v.PTF.ML.sig.05.tren
symbol	ensgene	baseMean.x	log2FoldChange.x	lfcSE.x	stat.x	pvalue.x	padj.x	gene_id.x	chr.x	start.x	end.x	strand.x	gene_type.x	source.x	cds.start.x	cds.end.x	protein_id.x	ensgene.y.x	baseMean.y	log2FoldChange.y	lfcSE.y	stat.y	pvalue.y	padj.y	gene_id.y	chr.y	start.y	end.y	strand.y	symbol.y	gene_type.y	source.y	cds.start.y	cds.end.y	protein_id.y	ensgene.y.y
SPON2	ENSG00000159674	4432	4.34194	0.243196	17.8537	2.71e-71	9.22e-68	ENSG00000159674.11	chr4	1166932	1208962	-	protein_coding	HAVANA|ENSEMBL	1167475	1172071	ENSP00000290902.5|ENSP00000394832.1|ENSP00000483599.1|ENSP00000424542.1|ENSP00000425871.1|ENSP00000422516.1|ENSP00000421634.1|ENSP00000421379.1|ENSP00000423414.1|ENSP00000421858.1	ENSG00000159674	6439.3	-1.05475	0.376124	-2.80425	0.00504332	0.0236539	ENSG00000159674.11	chr4	1166932	1208962	-	SPON2	protein_coding	HAVANA|ENSEMBL	1167475	1172071	ENSP00000290902.5|ENSP00000394832.1|ENSP00000483599.1|ENSP00000424542.1|ENSP00000425871.1|ENSP00000422516.1|ENSP00000421634.1|ENSP00000421379.1|ENSP00000423414.1|ENSP00000421858.1	ENSG00000159674
ACACA	ENSG00000278540	3170.58	2.29329	0.138473	16.5613	1.33e-61	1.31e-58	ENSG00000278540.4	chr17	37084988	37406818	-	protein_coding	HAVANA	37087056	37406299	ENSP00000483300.1|ENSP00000482269.1|ENSP00000478547.1|ENSP00000483969.1|ENSP00000482368.1|ENSP00000480371.1|ENSP00000482064.1|ENSP00000482498.1|ENSP00000483696.1|ENSP00000479621.1|ENSP00000481900.1|ENSP00000477912.1|ENSP00000483852.1|ENSP00000484948.1	ENSG00000278540	4323.64	-0.570446	0.202313	-2.81962	0.00480813	0.0227047	ENSG00000278540.4	chr17	37084988	37406818	-	ACACA	protein_coding	HAVANA	37087056	37406299	ENSP00000483300.1|ENSP00000482269.1|ENSP00000478547.1|ENSP00000483969.1|ENSP00000482368.1|ENSP00000480371.1|ENSP00000482064.1|ENSP00000482498.1|ENSP00000483696.1|ENSP00000479621.1|ENSP00000481900.1|ENSP00000477912.1|ENSP00000483852.1|ENSP00000484948.1	ENSG00000278540
RDH11	ENSG00000072042	3442.38	3.26788	0.205263	15.9204	4.57e-57	2.89e-54	ENSG00000072042.12	chr14	67676801	67695814	-	protein_coding	HAVANA	67678324	67695703	ENSP00000370750.4|ENSP00000452079.1|ENSP00000416395.2|ENSP00000451280.1|ENSP00000450802.1|ENSP00000450651.1|ENSP00000450435.1|ENSP00000452108.1	ENSG00000072042	4881.61	-0.846391	0.292882	-2.88987	0.00385398	0.0188461	ENSG00000072042.12	chr14	67676801	67695814	-	RDH11	protein_coding	HAVANA	67678324	67695703	ENSP00000370750.4|ENSP00000452079.1|ENSP00000416395.2|ENSP00000451280.1|ENSP00000450802.1|ENSP00000450651.1|ENSP00000450435.1|ENSP00000452108.1	ENSG00000072042
RP11-20I20.4	ENSG00000273179	182.38	4.09583	0.261739	15.6486	3.4e-55	1.84e-52	ENSG00000273179.1	chr4	1167778	1168174	+	antisense	HAVANA	NA	NA		ENSG00000273179	264.236	-1.14075	0.398632	-2.86167	0.0042141	0.020331	ENSG00000273179.1	chr4	1167778	1168174	+	RP11-20I20.4	antisense	HAVANA	NA	NA		ENSG00000273179
PODXL2	ENSG00000114631	277.118	2.56186	0.164142	15.6076	6.47e-55	3.37e-52	ENSG00000114631.10	chr3	127629181	127672809	+	protein_coding	HAVANA	127629220	127672477	ENSP00000345359.6	ENSG00000114631	383.15	-0.749884	0.227151	-3.30126	0.00096252	0.00575369	ENSG00000114631.10	chr3	127629181	127672809	+	PODXL2	protein_coding	HAVANA	127629220	127672477	ENSP00000345359.6	ENSG00000114631
RP11-718I15.1	ENSG00000267743	139.698	3.05267	0.197654	15.4445	8.21e-54	3.87e-51	ENSG00000267743.5	chr18	58189834	58195696	-	antisense	HAVANA	NA	NA		ENSG00000267743	196.581	-0.738902	0.264864	-2.78974	0.00527498	0.0245997	ENSG00000267743.5	chr18	58189834	58195696	-	RP11-718I15.1	antisense	HAVANA	NA	NA		ENSG00000267743
NPY	ENSG00000122585	1568.22	5.42757	0.354446	15.3128	6.28e-53	2.75e-50	ENSG00000122585.7	chr7	24284163	24291865	+	protein_coding	HAVANA	24285241	24291684	ENSP00000242152.2|ENSP00000384364.1|ENSP00000385282.1	ENSG00000122585	2301.39	-1.44212	0.5015	-2.87561	0.00403253	0.0195701	ENSG00000122585.7	chr7	24284163	24291865	+	NPY	protein_coding	HAVANA	24285241	24291684	ENSP00000242152.2|ENSP00000384364.1|ENSP00000385282.1	ENSG00000122585
HMGB1P24	ENSG00000275029	61.9463	1.88895	0.144184	13.101	3.25e-39	3.57e-37	ENSG00000275029.1	chr17	37143607	37144463	-	transcribed_processed_pseudogene	HAVANA	NA	NA		ENSG00000275029	82.3774	-0.579812	0.202841	-2.85845	0.00425714	0.020494	ENSG00000275029.1	chr17	37143607	37144463	-	HMGB1P24	transcribed_processed_pseudogene	HAVANA	NA	NA		ENSG00000275029
TMEFF2	ENSG00000144339	1843.31	3.79227	0.289974	13.078	4.4e-39	4.75e-37	ENSG00000144339.11	chr2	191949043	192195709	-	protein_coding	HAVANA	191950314	192194524	ENSP00000376128.1|ENSP00000272771.5|ENSP00000386871.3	ENSG00000144339	2649.06	-1.04968	0.363942	-2.88421	0.00392402	0.0191336	ENSG00000144339.11	chr2	191949043	192195709	-	TMEFF2	protein_coding	HAVANA	191950314	192194524	ENSP00000376128.1|ENSP00000272771.5|ENSP00000386871.3	ENSG00000144339
NAALADL2	ENSG00000177694	1002.54	2.44831	0.194473	12.5894	2.41e-36	1.89e-34	ENSG00000177694.14	chr3	174438573	175810552	+	protein_coding	HAVANA|ENSEMBL	174859408	175803200	ENSP00000409858.1|ENSP00000404705.1|ENSP00000479989.1|ENSP00000396969.1	ENSG00000177694	1377.13	-1.16741	0.278314	-4.19457	2.73e-05	0.000248216	ENSG00000177694.14	chr3	174438573	175810552	+	NAALADL2	protein_coding	HAVANA|ENSEMBL	174859408	175803200	ENSP00000409858.1|ENSP00000404705.1|ENSP00000479989.1|ENSP00000396969.1	ENSG00000177694
FLNB	ENSG00000136068	5324.21	1.36525	0.109	12.5253	5.43e-36	4.08e-34	ENSG00000136068.14	chr3	58008400	58172251	+	protein_coding	HAVANA|ENSEMBL	58008565	58170859	ENSP00000420213.1|ENSP00000295956.4|ENSP00000351339.3|ENSP00000415599.2|ENSP00000418510.1|ENSP00000420199.1|ENSP00000419954.1|ENSP00000414532.3	ENSG00000136068	6782.93	-0.488931	0.163555	-2.98939	0.00279535	0.0143109	ENSG00000136068.14	chr3	58008400	58172251	+	FLNB	protein_coding	HAVANA|ENSEMBL	58008565	58170859	ENSP00000420213.1|ENSP00000295956.4|ENSP00000351339.3|ENSP00000415599.2|ENSP00000418510.1|ENSP00000420199.1|ENSP00000419954.1|ENSP00000414532.3	ENSG00000136068
AC098617.1	ENSG00000233766	609.856	3.20465	0.256076	12.5145	6.22e-36	4.65e-34	ENSG00000233766.7	chr2	191846539	192044525	+	antisense	HAVANA	NA	NA		ENSG00000233766	863.775	-1.00208	0.349832	-2.86446	0.00417716	0.0201703	ENSG00000233766.7	chr2	191846539	192044525	+	AC098617.1	antisense	HAVANA	NA	NA		ENSG00000233766
MAOA	ENSG00000189221	1351.69	2.01496	0.166319	12.115	8.79e-34	5.21e-32	ENSG00000189221.9	chrX	43654907	43746824	+	protein_coding	HAVANA|ENSEMBL	43656342	43744510	ENSP00000440846.1|ENSP00000340684.3	ENSG00000189221	1812.76	-0.758816	0.208723	-3.63551	0.000277428	0.00195622	ENSG00000189221.9	chrX	43654907	43746824	+	MAOA	protein_coding	HAVANA|ENSEMBL	43656342	43744510	ENSP00000440846.1|ENSP00000340684.3	ENSG00000189221
KCNN2	ENSG00000080709	208.087	2.83939	0.237251	11.9679	5.23e-33	2.82e-31	ENSG00000080709.14	chr5	114360945	114496500	+	protein_coding	HAVANA|ENSEMBL	114362776	114496179	ENSP00000427120.3|ENSP00000483124.1|ENSP00000264773.2|ENSP00000487849.1|ENSP00000421439.1|ENSP00000421095.1	ENSG00000080709	290.966	-1.47975	0.33605	-4.40337	1.07e-05	0.000106051	ENSG00000080709.14	chr5	114360945	114496500	+	KCNN2	protein_coding	HAVANA|ENSEMBL	114362776	114496179	ENSP00000427120.3|ENSP00000483124.1|ENSP00000264773.2|ENSP00000487849.1|ENSP00000421439.1|ENSP00000421095.1	ENSG00000080709
MCCC2	ENSG00000131844	2043.03	2.35033	0.205704	11.4258	3.11e-30	1.24e-28	ENSG00000131844.15	chr5	71587288	71658704	+	protein_coding	HAVANA|ENSEMBL	71587426	71656857	ENSP00000486535.1|ENSP00000423202.2|ENSP00000343657.6|ENSP00000420994.2|ENSP00000425474.2	ENSG00000131844	2794.57	-1.24359	0.304207	-4.08798	4.35e-05	0.000377515	ENSG00000131844.15	chr5	71587288	71658704	+	MCCC2	protein_coding	HAVANA|ENSEMBL	71587426	71656857	ENSP00000486535.1|ENSP00000423202.2|ENSP00000343657.6|ENSP00000420994.2|ENSP00000425474.2	ENSG00000131844
RP11-744O11.2	ENSG00000236241	45.4757	2.42088	0.214704	11.2754	1.74e-29	6.46e-28	ENSG00000236241.1	chr3	175675087	175676801	-	processed_pseudogene	HAVANA	NA	NA		ENSG00000236241	62.2682	-1.23948	0.279105	-4.44091	8.96e-06	9.06e-05	ENSG00000236241.1	chr3	175675087	175676801	-	RP11-744O11.2	processed_pseudogene	HAVANA	NA	NA		ENSG00000236241
RP11-19G24.1	ENSG00000274308	24.7832	1.84724	0.163837	11.2749	1.75e-29	6.49e-28	ENSG00000274308.1	chr17	37140611	37141424	-	processed_pseudogene	HAVANA	NA	NA		ENSG00000274308	32.7565	-0.670342	0.219552	-3.05323	0.00226394	0.0119737	ENSG00000274308.1	chr17	37140611	37141424	-	RP11-19G24.1	processed_pseudogene	HAVANA	NA	NA		ENSG00000274308
RP11-388N2.1	ENSG00000233516	206.034	3.34241	0.296452	11.2747	1.75e-29	6.5e-28	ENSG00000233516.1	chr9	117462294	117466260	-	lincRNA	HAVANA	NA	NA		ENSG00000233516	292.925	-0.940971	0.336456	-2.79672	0.00516244	0.0241334	ENSG00000233516.1	chr9	117462294	117466260	-	RP11-388N2.1	lincRNA	HAVANA	NA	NA		ENSG00000233516
FGFRL1	ENSG00000127418	647.723	2.3122	0.205776	11.2365	2.7e-29	9.8e-28	ENSG00000127418.14	chr4	1009936	1026897	+	protein_coding	HAVANA|ENSEMBL	1012486	1025344	ENSP00000381498.2|ENSP00000425025.1|ENSP00000423091.1|ENSP00000426740.1|ENSP00000424037.1|ENSP00000264748.6	ENSG00000127418	885.448	-0.836409	0.308246	-2.71344	0.00665881	0.0298736	ENSG00000127418.14	chr4	1009936	1026897	+	FGFRL1	protein_coding	HAVANA|ENSEMBL	1012486	1025344	ENSP00000381498.2|ENSP00000425025.1|ENSP00000423091.1|ENSP00000426740.1|ENSP00000424037.1|ENSP00000264748.6	ENSG00000127418
C8orf34-AS1	ENSG00000248801	35.8733	2.10743	0.19811	10.6377	1.99e-26	5.35e-25	ENSG00000248801.6	chr8	68303468	68331491	-	antisense	HAVANA	NA	NA		ENSG00000248801	48.3325	-0.735802	0.254953	-2.88602	0.00390142	0.0190507	ENSG00000248801.6	chr8	68303468	68331491	-	C8orf34-AS1	antisense	HAVANA	NA	NA		ENSG00000248801
SCHLAP1	ENSG00000281131	124.55	3.98483	0.376004	10.5978	3.05e-26	8.06e-25	ENSG00000281131.1	chr2	180692104	180916939	+	lincRNA	HAVANA	NA	NA		ENSG00000281131	179.785	-2.30155	0.540953	-4.25462	2.09e-05	0.000194718	ENSG00000281131.1	chr2	180692104	180916939	+	SCHLAP1	lincRNA	HAVANA	NA	NA		ENSG00000281131
RWDD2A	ENSG00000013392	125.639	1.29502	0.122247	10.5935	3.19e-26	8.43e-25	ENSG00000013392.7	chr6	83193379	83198932	+	protein_coding	HAVANA	83194452	83196269	ENSP00000358739.3	ENSG00000013392	158.785	-0.530484	0.174914	-3.03283	0.00242275	0.0126728	ENSG00000013392.7	chr6	83193379	83198932	+	RWDD2A	protein_coding	HAVANA	83194452	83196269	ENSP00000358739.3	ENSG00000013392
PCAT4	ENSG00000251321	246.582	3.63339	0.344993	10.5318	6.17e-26	1.58e-24	ENSG00000251321.1	chr4	79827471	79877770	+	lincRNA	HAVANA	NA	NA		ENSG00000251321	352.67	-1.2506	0.484366	-2.58193	0.00982497	0.0411323	ENSG00000251321.1	chr4	79827471	79877770	+	PCAT4	lincRNA	HAVANA	NA	NA		ENSG00000251321
C15orf48	ENSG00000166920	36.4593	3.56696	0.339384	10.5101	7.76e-26	1.97e-24	ENSG00000166920.10	chr15	45430529	45448761	+	protein_coding	HAVANA	45430797	45448761	ENSP00000379887.2|ENSP00000452967.1|ENSP00000341610.3	ENSG00000166920	52.0789	-1.86583	0.482111	-3.87012	0.000108781	0.000857409	ENSG00000166920.10	chr15	45430529	45448761	+	C15orf48	protein_coding	HAVANA	45430797	45448761	ENSP00000379887.2|ENSP00000452967.1|ENSP00000341610.3	ENSG00000166920
RP11-739A13.1	ENSG00000279559	31.9564	5.08446	0.49243	10.3252	5.42e-25	1.27e-23	ENSG00000279559.1	chr2	180801227	180801533	+	TEC	HAVANA	NA	NA		ENSG00000279559	46.7394	-2.37867	0.659774	-3.60528	0.000311815	0.00216446	ENSG00000279559.1	chr2	180801227	180801533	+	RP11-739A13.1	TEC	HAVANA	NA	NA		ENSG00000279559
MFSD3	ENSG00000167700	69.4365	0.912908	0.0909741	10.0348	1.07e-23	2.23e-22	ENSG00000167700.8	chr8	144509074	144511213	+	protein_coding	HAVANA	144509334	144511161	ENSP00000301327.3	ENSG00000167700	83.8159	-0.349913	0.130076	-2.69006	0.00714383	0.031633	ENSG00000167700.8	chr8	144509074	144511213	+	MFSD3	protein_coding	HAVANA	144509334	144511161	ENSP00000301327.3	ENSG00000167700
PSAT1	ENSG00000135069	103.143	1.62157	0.163062	9.94445	2.67e-23	5.35e-22	ENSG00000135069.13	chr9	78297143	78330093	+	protein_coding	HAVANA	78297211	78329083	ENSP00000317606.2|ENSP00000365773.3	ENSG00000135069	134.447	-0.70003	0.238243	-2.9383	0.00330017	0.0164837	ENSG00000135069.13	chr9	78297143	78330093	+	PSAT1	protein_coding	HAVANA	78297211	78329083	ENSP00000317606.2|ENSP00000365773.3	ENSG00000135069
NAALADL2-AS1	ENSG00000225552	25.1308	2.3057	0.232088	9.93458	2.94e-23	5.89e-22	ENSG00000225552.1	chr3	175773145	175776333	-	antisense	HAVANA	NA	NA		ENSG00000225552	34.1863	-1.19381	0.289496	-4.12375	3.73e-05	0.00032834	ENSG00000225552.1	chr3	175773145	175776333	-	NAALADL2-AS1	antisense	HAVANA	NA	NA		ENSG00000225552
SLC27A2	ENSG00000140284	58.7842	1.72482	0.174881	9.86283	6.03e-23	1.17e-21	ENSG00000140284.10	chr15	50182196	50236395	+	protein_coding	HAVANA	50182428	50236093	ENSP00000267842.5|ENSP00000370289.4|ENSP00000444549.1	ENSG00000140284	77.1025	-0.755929	0.225794	-3.34787	0.000814349	0.00498365	ENSG00000140284.10	chr15	50182196	50236395	+	SLC27A2	protein_coding	HAVANA	50182428	50236093	ENSP00000267842.5|ENSP00000370289.4|ENSP00000444549.1	ENSG00000140284
NAALADL2-AS3	ENSG00000230292	15.2829	2.10051	0.215753	9.73573	2.12e-22	3.91e-21	ENSG00000230292.5	chr3	175079307	175115242	-	processed_transcript	HAVANA	NA	NA		ENSG00000230292	20.5644	-0.734901	0.268208	-2.74004	0.0061431	0.0279415	ENSG00000230292.5	chr3	175079307	175115242	-	NAALADL2-AS3	processed_transcript	HAVANA	NA	NA		ENSG00000230292
NDRG3	ENSG00000101079	628.899	1.27124	0.133033	9.55582	1.23e-21	2.11e-20	ENSG00000101079.20	chr20	36651766	36746078	-	protein_coding	HAVANA|ENSEMBL	36653523	36721735	ENSP00000362909.2|ENSP00000352703.2|ENSP00000345292.1|ENSP00000362878.3|ENSP00000416636.1	ENSG00000101079	793.095	-0.833029	0.200766	-4.14925	3.34e-05	0.000297374	ENSG00000101079.20	chr20	36651766	36746078	-	NDRG3	protein_coding	HAVANA|ENSEMBL	36653523	36721735	ENSP00000362909.2|ENSP00000352703.2|ENSP00000345292.1|ENSP00000362878.3|ENSP00000416636.1	ENSG00000101079
POP7	ENSG00000172336	56.9018	0.782528	0.0824852	9.48689	2.38e-21	3.99e-20	ENSG00000172336.4	chr7	100706053	100707495	+	protein_coding	HAVANA	100706831	100707250	ENSP00000304353.4|ENSP00000387814.1	ENSG00000172336	67.6547	-0.300133	0.118821	-2.52593	0.0115393	0.0469167	ENSG00000172336.4	chr7	100706053	100707495	+	POP7	protein_coding	HAVANA	100706831	100707250	ENSP00000304353.4|ENSP00000387814.1	ENSG00000172336
RP11-315E17.1	ENSG00000258162	83.4088	2.57167	0.272937	9.42221	4.42e-21	7.23e-20	ENSG00000258162.2	chr12	81378042	81472954	+	antisense	HAVANA	NA	NA		ENSG00000258162	115.276	-2.34297	0.363935	-6.43788	1.21e-10	2.71e-09	ENSG00000258162.2	chr12	81378042	81472954	+	RP11-315E17.1	antisense	HAVANA	NA	NA		ENSG00000258162
MIR4664	ENSG00000265660	5.58631	2.05984	0.221307	9.30761	1.31e-20	2.05e-19	ENSG00000265660.1	chr8	143733083	143733153	-	miRNA	ENSEMBL	NA	NA		ENSG00000265660	7.56183	-0.654297	0.222418	-2.94175	0.00326367	0.0163235	ENSG00000265660.1	chr8	143733083	143733153	-	MIR4664	miRNA	ENSEMBL	NA	NA		ENSG00000265660
LYPLA1	ENSG00000120992	451.498	0.947929	0.104369	9.08246	1.06e-19	1.54e-18	ENSG00000120992.17	chr8	54046367	54102017	-	protein_coding	HAVANA|ENSEMBL	54048068	54101823	ENSP00000320043.3|ENSP00000484280.1|ENSP00000482430.1|ENSP00000344477.6|ENSP00000428729.1|ENSP00000427967.1|ENSP00000428306.1|ENSP00000430791.2	ENSG00000120992	548.995	-0.475813	0.162987	-2.91934	0.00350778	0.0173815	ENSG00000120992.17	chr8	54046367	54102017	-	LYPLA1	protein_coding	HAVANA|ENSEMBL	54048068	54101823	ENSP00000320043.3|ENSP00000484280.1|ENSP00000482430.1|ENSP00000344477.6|ENSP00000428729.1|ENSP00000427967.1|ENSP00000428306.1|ENSP00000430791.2	ENSG00000120992
PIGH	ENSG00000100564	107.115	0.832702	0.0922313	9.02841	1.74e-19	2.47e-18	ENSG00000100564.8	chr14	67581955	67600287	-	protein_coding	HAVANA	67582170	67600203	ENSP00000453759.1|ENSP00000216452.4|ENSP00000452816.1|ENSP00000453394.1|ENSP00000453158.1|ENSP00000452924.1|ENSP00000452974.1|ENSP00000454061.1|ENSP00000453733.1|ENSP00000452996.1	ENSG00000100564	128.438	-0.357292	0.141781	-2.52004	0.0117343	0.0475218	ENSG00000100564.8	chr14	67581955	67600287	-	PIGH	protein_coding	HAVANA	67582170	67600203	ENSP00000453759.1|ENSP00000216452.4|ENSP00000452816.1|ENSP00000453394.1|ENSP00000453158.1|ENSP00000452924.1|ENSP00000452974.1|ENSP00000454061.1|ENSP00000453733.1|ENSP00000452996.1	ENSG00000100564
IFT57	ENSG00000114446	662.832	1.23066	0.138178	8.90631	5.28e-19	7.17e-18	ENSG00000114446.4	chr3	108160812	108222570	-	protein_coding	HAVANA	108162480	108222322	ENSP00000264538.3|ENSP00000417768.1|ENSP00000417439.1	ENSG00000114446	832.292	-0.9915	0.207482	-4.77874	1.76e-06	2.05e-05	ENSG00000114446.4	chr3	108160812	108222570	-	IFT57	protein_coding	HAVANA	108162480	108222322	ENSP00000264538.3|ENSP00000417768.1|ENSP00000417439.1	ENSG00000114446
PPFIA2	ENSG00000139220	421.515	2.3555	0.265685	8.86576	7.6e-19	1.02e-17	ENSG00000139220.16	chr12	81257975	81759553	-	protein_coding	HAVANA|ENSEMBL	81259635	81754221	ENSP00000445532.1|ENSP00000327416.8|ENSP00000450337.1|ENSP00000449558.2|ENSP00000450298.1|ENSP00000438337.2|ENSP00000449821.1|ENSP00000447273.2|ENSP00000385093.4|ENSP00000449338.1|ENSP00000388373.3|ENSP00000447868.1|ENSP00000447189.1|ENSP00000449524.1|ENSP00000448941.1|ENSP00000447792.1|ENSP00000446555.1|ENSP00000449469.1|ENSP00000447918.1	ENSG00000139220	576.864	-2.47514	0.357374	-6.9259	4.33e-12	1.17e-10	ENSG00000139220.16	chr12	81257975	81759553	-	PPFIA2	protein_coding	HAVANA|ENSEMBL	81259635	81754221	ENSP00000445532.1|ENSP00000327416.8|ENSP00000450337.1|ENSP00000449558.2|ENSP00000450298.1|ENSP00000438337.2|ENSP00000449821.1|ENSP00000447273.2|ENSP00000385093.4|ENSP00000449338.1|ENSP00000388373.3|ENSP00000447868.1|ENSP00000447189.1|ENSP00000449524.1|ENSP00000448941.1|ENSP00000447792.1|ENSP00000446555.1|ENSP00000449469.1|ENSP00000447918.1	ENSG00000139220
DSCAM-AS1	ENSG00000235123	47.0666	2.81803	0.322307	8.7433	2.26e-18	2.9e-17	ENSG00000235123.5	chr21	40383083	40385358	+	antisense	HAVANA	NA	NA		ENSG00000235123	65.7234	-1.11381	0.436523	-2.55156	0.0107243	0.0442388	ENSG00000235123.5	chr21	40383083	40385358	+	DSCAM-AS1	antisense	HAVANA	NA	NA		ENSG00000235123
RP11-242F11.2	ENSG00000234675	12.9658	1.91342	0.220826	8.66484	4.52e-18	5.64e-17	ENSG00000234675.1	chr6	148017422	148020974	-	lincRNA	HAVANA	NA	NA		ENSG00000234675	17.2483	-0.731135	0.273307	-2.67514	0.00746983	0.0328206	ENSG00000234675.1	chr6	148017422	148020974	-	RP11-242F11.2	lincRNA	HAVANA	NA	NA		ENSG00000234675
RPL36AP43	ENSG00000241362	22.4704	1.19512	0.139446	8.57046	1.03e-17	1.24e-16	ENSG00000241362.2	chr15	89687937	89688243	-	processed_pseudogene	HAVANA	NA	NA		ENSG00000241362	28.0972	-0.582875	0.192788	-3.0234	0.0024995	0.0130067	ENSG00000241362.2	chr15	89687937	89688243	-	RPL36AP43	processed_pseudogene	HAVANA	NA	NA		ENSG00000241362
AC005538.5	ENSG00000237581	14.2572	2.86398	0.334552	8.56066	1.12e-17	1.35e-16	ENSG00000237581.1	chr2	233946146	233955435	-	antisense	HAVANA	NA	NA		ENSG00000237581	19.7891	-1.04626	0.409474	-2.55513	0.0106148	0.0438299	ENSG00000237581.1	chr2	233946146	233955435	-	AC005538.5	antisense	HAVANA	NA	NA		ENSG00000237581
MALT1	ENSG00000172175	1658.35	1.40062	0.164627	8.50783	1.77e-17	2.09e-16	ENSG00000172175.12	chr18	58671386	58754477	+	protein_coding	HAVANA	58671644	58747839	ENSP00000319279.4|ENSP00000304161.3|ENSP00000467222.1	ENSG00000172175	2118.11	-0.712659	0.26819	-2.65729	0.00787708	0.0342733	ENSG00000172175.12	chr18	58671386	58754477	+	MALT1	protein_coding	HAVANA	58671644	58747839	ENSP00000319279.4|ENSP00000304161.3|ENSP00000467222.1	ENSG00000172175
MIR4789	ENSG00000264974	4.73322	2.56465	0.301592	8.50371	1.84e-17	2.17e-16	ENSG00000264974.1	chr3	175369540	175369621	+	miRNA	ENSEMBL	NA	NA		ENSG00000264974	6.5558	-0.84886	0.32459	-2.61518	0.00891809	0.0380294	ENSG00000264974.1	chr3	175369540	175369621	+	MIR4789	miRNA	ENSEMBL	NA	NA		ENSG00000264974
AC243654.1	ENSG00000278660	11.9048	1.61972	0.193887	8.35394	6.6e-17	7.4e-16	ENSG00000278660.1	chr17	37314341	37314439	+	miRNA	ENSEMBL	NA	NA		ENSG00000278660	15.5011	-0.646716	0.236184	-2.73818	0.00617801	0.0280691	ENSG00000278660.1	chr17	37314341	37314439	+	AC243654.1	miRNA	ENSEMBL	NA	NA		ENSG00000278660
RRS1-AS1	ENSG00000246145	61.6242	1.17323	0.141198	8.30912	9.64e-17	1.06e-15	ENSG00000246145.1	chr8	66419589	66428977	-	lincRNA	HAVANA	NA	NA		ENSG00000246145	76.7917	-0.561361	0.202095	-2.77771	0.00547438	0.0254012	ENSG00000246145.1	chr8	66419589	66428977	-	RRS1-AS1	lincRNA	HAVANA	NA	NA		ENSG00000246145
BMPR1B-AS1	ENSG00000249599	14.7478	2.10338	0.254912	8.25139	1.57e-16	1.69e-15	ENSG00000249599.1	chr4	94743800	94757533	-	lincRNA	HAVANA	NA	NA		ENSG00000249599	19.8705	-1.01419	0.284922	-3.55952	0.000371538	0.00253233	ENSG00000249599.1	chr4	94743800	94757533	-	BMPR1B-AS1	lincRNA	HAVANA	NA	NA		ENSG00000249599
NUDT8	ENSG00000167799	42.7311	1.65635	0.203281	8.1481	3.7e-16	3.88e-15	ENSG00000167799.9	chr11	67627938	67629930	-	protein_coding	HAVANA	67627949	67629911	ENSP00000301490.4|ENSP00000365883.2	ENSG00000167799	55.6491	-0.807022	0.288101	-2.80118	0.00509156	0.0238498	ENSG00000167799.9	chr11	67627938	67629930	-	NUDT8	protein_coding	HAVANA	67627949	67629911	ENSP00000301490.4|ENSP00000365883.2	ENSG00000167799
RP11-368L12.1	ENSG00000260658	38.7106	2.44533	0.300925	8.12602	4.44e-16	4.63e-15	ENSG00000260658.5	chr16	63314264	63618046	-	lincRNA	HAVANA	NA	NA		ENSG00000260658	53.1274	-1.00287	0.397659	-2.52192	0.0116715	0.0473153	ENSG00000260658.5	chr16	63314264	63618046	-	RP11-368L12.1	lincRNA	HAVANA	NA	NA		ENSG00000260658
CCNG2	ENSG00000138764	1090.98	0.895471	0.110406	8.11069	5.03e-16	5.22e-15	ENSG00000138764.13	chr4	77157151	77433388	+	protein_coding	HAVANA|ENSEMBL	77158533	77179142	ENSP00000315743.5|ENSP00000346379.6|ENSP00000424665.1|ENSP00000379002.1|ENSP00000426085.1|ENSP00000426476.1	ENSG00000138764	1317.75	-0.465202	0.174626	-2.66399	0.00772204	0.0337346	ENSG00000138764.13	chr4	77157151	77433388	+	CCNG2	protein_coding	HAVANA|ENSEMBL	77158533	77179142	ENSP00000315743.5|ENSP00000346379.6|ENSP00000424665.1|ENSP00000379002.1|ENSP00000426085.1|ENSP00000426476.1	ENSG00000138764
AC093642.5	ENSG00000220804	154.859	1.03561	0.128391	8.06606	7.26e-16	7.43e-15	ENSG00000220804.8	chr2	242088633	242160153	+	transcribed_unprocessed_pseudogene	HAVANA	NA	NA		ENSG00000220804	190.295	-0.665661	0.196405	-3.38923	0.000700891	0.0043727	ENSG00000220804.8	chr2	242088633	242160153	+	AC093642.5	transcribed_unprocessed_pseudogene	HAVANA	NA	NA		ENSG00000220804
BEND3	ENSG00000178409	114.247	0.971054	0.120392	8.06577	7.28e-16	7.45e-15	ENSG00000178409.13	chr6	107065182	107115269	-	protein_coding	HAVANA|ENSEMBL	107068707	107099285	ENSP00000358038.1|ENSP00000411268.2	ENSG00000178409	139.245	-0.572782	0.158756	-3.60794	0.000308632	0.00214517	ENSG00000178409.13	chr6	107065182	107115269	-	BEND3	protein_coding	HAVANA|ENSEMBL	107068707	107099285	ENSP00000358038.1|ENSP00000411268.2	ENSG00000178409
PPP1R14B	ENSG00000173457	128.715	0.685271	0.0859839	7.96976	1.59e-15	1.59e-14	ENSG00000173457.10	chr11	64244480	64246941	-	protein_coding	HAVANA	64244757	64246673	ENSP00000441067.1|ENSP00000310117.3|ENSP00000439333.1	ENSG00000173457	151.208	-0.373006	0.127162	-2.93332	0.00335359	0.0167094	ENSG00000173457.10	chr11	64244480	64246941	-	PPP1R14B	protein_coding	HAVANA	64244757	64246673	ENSP00000441067.1|ENSP00000310117.3|ENSP00000439333.1	ENSG00000173457
MCCC1	ENSG00000078070	427.922	0.576381	0.0726634	7.93221	2.15e-15	2.12e-14	ENSG00000078070.11	chr3	183015218	183116075	-	protein_coding	HAVANA|ENSEMBL	183015441	183099440	ENSP00000265594.4|ENSP00000419898.1|ENSP00000441253.2|ENSP00000420088.1|ENSP00000480435.1|ENSP00000486824.1|ENSP00000420648.1|ENSP00000419658.1|ENSP00000420433.1|ENSP00000419328.1|ENSP00000420591.1|ENSP00000418979.1|ENSP00000420223.1	ENSG00000078070	494.334	-0.295415	0.116176	-2.54281	0.0109964	0.0451737	ENSG00000078070.11	chr3	183015218	183116075	-	MCCC1	protein_coding	HAVANA|ENSEMBL	183015441	183099440	ENSP00000265594.4|ENSP00000419898.1|ENSP00000441253.2|ENSP00000420088.1|ENSP00000480435.1|ENSP00000486824.1|ENSP00000420648.1|ENSP00000419658.1|ENSP00000420433.1|ENSP00000419328.1|ENSP00000420591.1|ENSP00000418979.1|ENSP00000420223.1	ENSG00000078070
MANF	ENSG00000145050	235.966	0.724617	0.0918746	7.88702	3.09e-15	3.01e-14	ENSG00000145050.15	chr3	51385047	51389397	+	protein_coding	HAVANA	51385334	51389086	ENSP00000432799.2|ENSP00000405280.1	ENSG00000145050	278.625	-0.565068	0.137267	-4.11655	3.85e-05	0.000337617	ENSG00000145050.15	chr3	51385047	51389397	+	MANF	protein_coding	HAVANA	51385334	51389086	ENSP00000432799.2|ENSP00000405280.1	ENSG00000145050
UBE2V1P2	ENSG00000214192	14.1958	1.54691	0.197986	7.81323	5.57e-15	5.3e-14	ENSG00000214192.3	chr3	175718231	175718670	-	processed_pseudogene	HAVANA	NA	NA		ENSG00000214192	18.3459	-0.959543	0.246281	-3.89614	9.77e-05	0.00078122	ENSG00000214192.3	chr3	175718231	175718670	-	UBE2V1P2	processed_pseudogene	HAVANA	NA	NA		ENSG00000214192
RBBP4P1	ENSG00000249485	82.5005	1.06073	0.137601	7.7087	1.27e-14	1.17e-13	ENSG00000249485.1	chr5	14797125	14798400	-	processed_pseudogene	HAVANA	NA	NA		ENSG00000249485	101.741	-0.727496	0.210717	-3.45247	0.000555473	0.0035815	ENSG00000249485.1	chr5	14797125	14798400	-	RBBP4P1	processed_pseudogene	HAVANA	NA	NA		ENSG00000249485
PDE10A	ENSG00000112541	372.385	1.15688	0.151	7.66143	1.84e-14	1.67e-13	ENSG00000112541.13	chr6	165327287	165986603	-	protein_coding	HAVANA|ENSEMBL	165333028	165662013	ENSP00000355847.1|ENSP00000438284.2|ENSP00000478556.1	ENSG00000112541	463.64	-0.71599	0.233681	-3.06396	0.00218425	0.0116021	ENSG00000112541.13	chr6	165327287	165986603	-	PDE10A	protein_coding	HAVANA|ENSEMBL	165333028	165662013	ENSP00000355847.1|ENSP00000438284.2|ENSP00000478556.1	ENSG00000112541
SPATA13	ENSG00000182957	556.786	0.591347	0.0774569	7.63453	2.27e-14	2.04e-13	ENSG00000182957.15	chr13	23979805	24307074	+	protein_coding	HAVANA|ENSEMBL	24222930	24302770	ENSP00000398560.2|ENSP00000371542.3|ENSP00000371527.4|ENSP00000401605.1|ENSP00000477296.1|ENSP00000343631.6|ENSP00000382830.2|ENSP00000386471.1|ENSP00000397498.1|ENSP00000477304.1	ENSG00000182957	645.089	-0.306269	0.119996	-2.55234	0.0107004	0.0441543	ENSG00000182957.15	chr13	23979805	24307074	+	SPATA13	protein_coding	HAVANA|ENSEMBL	24222930	24302770	ENSP00000398560.2|ENSP00000371542.3|ENSP00000371527.4|ENSP00000401605.1|ENSP00000477296.1|ENSP00000343631.6|ENSP00000382830.2|ENSP00000386471.1|ENSP00000397498.1|ENSP00000477304.1	ENSG00000182957
PYCRL	ENSG00000104524	76.9931	0.673554	0.0886818	7.59518	3.07e-14	2.74e-13	ENSG00000104524.13	chr8	143603913	143609773	-	protein_coding	HAVANA	143605703	143609584	ENSP00000220966.6|ENSP00000480945.1|ENSP00000401804.2|ENSP00000404493.2|ENSP00000366802.3|ENSP00000478138.1	ENSG00000104524	90.2146	-0.385303	0.126141	-3.05454	0.00225403	0.0119355	ENSG00000104524.13	chr8	143603913	143609773	-	PYCRL	protein_coding	HAVANA	143605703	143609584	ENSP00000220966.6|ENSP00000480945.1|ENSP00000401804.2|ENSP00000404493.2|ENSP00000366802.3|ENSP00000478138.1	ENSG00000104524
MRPL15	ENSG00000137547	111.331	0.641966	0.0846095	7.5874	3.26e-14	2.9e-13	ENSG00000137547.8	chr8	54135210	54147901	+	protein_coding	HAVANA	54135284	54147716	ENSP00000260102.4|ENSP00000428581.1|ENSP00000429252.2	ENSG00000137547	130.005	-0.335553	0.128507	-2.61115	0.00902372	0.0383911	ENSG00000137547.8	chr8	54135210	54147901	+	MRPL15	protein_coding	HAVANA	54135284	54147716	ENSP00000260102.4|ENSP00000428581.1|ENSP00000429252.2	ENSG00000137547
RAB18	ENSG00000099246	710.692	0.728526	0.0967604	7.52917	5.11e-14	4.45e-13	ENSG00000099246.16	chr10	27504174	27542237	+	protein_coding	HAVANA|ENSEMBL	27504370	27538048	ENSP00000439321.1|ENSP00000483927.1|ENSP00000349415.6|ENSP00000364960.3|ENSP00000478479.1|ENSP00000407872.1	ENSG00000099246	839.495	-0.477081	0.146506	-3.2564	0.00112835	0.00660239	ENSG00000099246.16	chr10	27504174	27542237	+	RAB18	protein_coding	HAVANA|ENSEMBL	27504370	27538048	ENSP00000439321.1|ENSP00000483927.1|ENSP00000349415.6|ENSP00000364960.3|ENSP00000478479.1|ENSP00000407872.1	ENSG00000099246
PRDX4	ENSG00000123131	191.045	0.859908	0.115145	7.46807	8.14e-14	6.97e-13	ENSG00000123131.12	chrX	23664262	23686399	+	protein_coding	HAVANA	23664520	23686332	ENSP00000368654.1|ENSP00000368646.4|ENSP00000368635.3|ENSP00000413736.1	ENSG00000123131	229.876	-0.451001	0.172857	-2.60911	0.00907786	0.038577	ENSG00000123131.12	chrX	23664262	23686399	+	PRDX4	protein_coding	HAVANA	23664520	23686332	ENSP00000368654.1|ENSP00000368646.4|ENSP00000368635.3|ENSP00000413736.1	ENSG00000123131
PWAR1	ENSG00000279050	39.9611	0.950389	0.12768	7.44353	9.8e-14	8.33e-13	ENSG00000279050.1	chr15	25135642	25138055	+	TEC	HAVANA	NA	NA		ENSG00000279050	48.4893	-0.521105	0.173222	-3.00831	0.00262708	0.0135718	ENSG00000279050.1	chr15	25135642	25138055	+	PWAR1	TEC	HAVANA	NA	NA		ENSG00000279050
PDSS2	ENSG00000164494	210.255	0.666839	0.0896117	7.44142	9.96e-14	8.46e-13	ENSG00000164494.11	chr6	107152557	107459564	-	protein_coding	HAVANA	107154622	107459285	ENSP00000358033.4|ENSP00000392613.1|ENSP00000358027.4	ENSG00000164494	246.31	-0.42751	0.13819	-3.09363	0.00197721	0.010683	ENSG00000164494.11	chr6	107152557	107459564	-	PDSS2	protein_coding	HAVANA	107154622	107459285	ENSP00000358033.4|ENSP00000392613.1|ENSP00000358027.4	ENSG00000164494
TWISTNB	ENSG00000105849	260.683	0.844174	0.113964	7.40736	1.29e-13	1.08e-12	ENSG00000105849.5	chr7	19695462	19709087	-	protein_coding	HAVANA	19698319	19709016	ENSP00000222567.5	ENSG00000105849	312.738	-0.572666	0.184303	-3.1072	0.00188866	0.0102779	ENSG00000105849.5	chr7	19695462	19709087	-	TWISTNB	protein_coding	HAVANA	19698319	19709016	ENSP00000222567.5	ENSG00000105849
AC004066.3	ENSG00000250522	14.1402	1.77188	0.239583	7.39568	1.41e-13	1.18e-12	ENSG00000250522.1	chr4	105540190	105552355	-	antisense	HAVANA	NA	NA		ENSG00000250522	18.5793	-0.756211	0.26834	-2.8181	0.00483081	0.0227826	ENSG00000250522.1	chr4	105540190	105552355	-	AC004066.3	antisense	HAVANA	NA	NA		ENSG00000250522
DPY19L2	ENSG00000177990	423.142	1.37781	0.186503	7.3876	1.49e-13	1.25e-12	ENSG00000177990.11	chr12	63558913	63668939	-	protein_coding	HAVANA	63560515	63668393	ENSP00000315988.4|ENSP00000437474.1|ENSP00000445878.1|ENSP00000443126.1|ENSP00000439567.1|ENSP00000444932.1	ENSG00000177990	539.224	-0.913539	0.27922	-3.27176	0.00106881	0.00629895	ENSG00000177990.11	chr12	63558913	63668939	-	DPY19L2	protein_coding	HAVANA	63560515	63668393	ENSP00000315988.4|ENSP00000437474.1|ENSP00000445878.1|ENSP00000443126.1|ENSP00000439567.1|ENSP00000444932.1	ENSG00000177990
SSR2	ENSG00000163479	538.275	0.374911	0.0513083	7.30703	2.73e-13	2.22e-12	ENSG00000163479.13	chr1	156009048	156020959	-	protein_coding	HAVANA	156009543	156020896	ENSP00000295702.4|ENSP00000434870.1|ENSP00000436201.1|ENSP00000432831.1|ENSP00000434306.1|ENSP00000431366.1|ENSP00000436228.1|ENSP00000437239.1|ENSP00000435692.1|ENSP00000434532.2	ENSG00000163479	602.105	-0.201678	0.0770425	-2.61775	0.00885111	0.0377947	ENSG00000163479.13	chr1	156009048	156020959	-	SSR2	protein_coding	HAVANA	156009543	156020896	ENSP00000295702.4|ENSP00000434870.1|ENSP00000436201.1|ENSP00000432831.1|ENSP00000434306.1|ENSP00000431366.1|ENSP00000436228.1|ENSP00000437239.1|ENSP00000435692.1|ENSP00000434532.2	ENSG00000163479
PRMT6	ENSG00000198890	135.946	0.586394	0.0805633	7.27867	3.37e-13	2.72e-12	ENSG00000198890.7	chr1	107056679	107059294	+	protein_coding	HAVANA	107056716	107057840	ENSP00000359095.1	ENSG00000198890	157.275	-0.315953	0.122303	-2.58336	0.00978445	0.0409897	ENSG00000198890.7	chr1	107056679	107059294	+	PRMT6	protein_coding	HAVANA	107056716	107057840	ENSP00000359095.1	ENSG00000198890
LINC01137	ENSG00000233621	47.4739	0.947198	0.131287	7.21471	5.41e-13	4.29e-12	ENSG00000233621.1	chr1	37454879	37474411	-	antisense	HAVANA	NA	NA		ENSG00000233621	57.5687	-0.674541	0.188154	-3.58505	0.000337012	0.00232021	ENSG00000233621.1	chr1	37454879	37474411	-	LINC01137	antisense	HAVANA	NA	NA		ENSG00000233621
THEM6	ENSG00000130193	97.4743	0.691889	0.0959464	7.2112	5.55e-13	4.39e-12	ENSG00000130193.7	chr8	142727203	142736927	+	protein_coding	HAVANA	142727347	142735436	ENSP00000338607.3|ENSP00000427970.1	ENSG00000130193	114.488	-0.606231	0.140962	-4.30067	1.7e-05	0.000162536	ENSG00000130193.7	chr8	142727203	142736927	+	THEM6	protein_coding	HAVANA	142727347	142735436	ENSP00000338607.3|ENSP00000427970.1	ENSG00000130193
CTB-107G13.1	ENSG00000234715	46.8327	1.47426	0.204604	7.20546	5.78e-13	4.57e-12	ENSG00000234715.1	chr7	103445207	103514007	+	antisense	HAVANA	NA	NA		ENSG00000234715	60.0898	-0.931662	0.286967	-3.24658	0.001168	0.00680381	ENSG00000234715.1	chr7	103445207	103514007	+	CTB-107G13.1	antisense	HAVANA	NA	NA		ENSG00000234715
COASY	ENSG00000068120	231.539	0.351843	0.0488562	7.20161	5.95e-13	4.7e-12	ENSG00000068120.14	chr17	42561467	42566277	+	protein_coding	HAVANA	42562412	42565965	ENSP00000467174.1|ENSP00000467519.1|ENSP00000466838.1|ENSP00000393564.2|ENSP00000467687.1|ENSP00000468755.1|ENSP00000468583.1|ENSP00000467322.1|ENSP00000464814.1|ENSP00000377406.1	ENSG00000068120	257.935	-0.197252	0.0740535	-2.66365	0.0077298	0.0337552	ENSG00000068120.14	chr17	42561467	42566277	+	COASY	protein_coding	HAVANA	42562412	42565965	ENSP00000467174.1|ENSP00000467519.1|ENSP00000466838.1|ENSP00000393564.2|ENSP00000467687.1|ENSP00000468755.1|ENSP00000468583.1|ENSP00000467322.1|ENSP00000464814.1|ENSP00000377406.1	ENSG00000068120
RP11-33A14.1	ENSG00000223930	79.7564	2.12032	0.297449	7.12836	1.02e-12	7.83e-12	ENSG00000223930.5	chr3	178202050	178385417	-	lincRNA	HAVANA	NA	NA		ENSG00000223930	107.381	-1.10131	0.412792	-2.66796	0.00763125	0.0333973	ENSG00000223930.5	chr3	178202050	178385417	-	RP11-33A14.1	lincRNA	HAVANA	NA	NA		ENSG00000223930
PCCB	ENSG00000114054	259.827	0.644496	0.0904215	7.12768	1.02e-12	7.87e-12	ENSG00000114054.13	chr3	136250306	136337896	+	protein_coding	HAVANA	136250376	136334304	ENSP00000251654.4|ENSP00000418307.1|ENSP00000420639.1|ENSP00000419129.1|ENSP00000420391.1|ENSP00000420158.1|ENSP00000417937.1|ENSP00000417253.1|ENSP00000417549.1|ENSP00000419027.1|ENSP00000419263.1|ENSP00000420759.1|ENSP00000419563.1|ENSP00000418020.1|ENSP00000419293.1	ENSG00000114054	302.837	-0.569751	0.141096	-4.03804	5.39e-05	0.000457829	ENSG00000114054.13	chr3	136250306	136337896	+	PCCB	protein_coding	HAVANA	136250376	136334304	ENSP00000251654.4|ENSP00000418307.1|ENSP00000420639.1|ENSP00000419129.1|ENSP00000420391.1|ENSP00000420158.1|ENSP00000417937.1|ENSP00000417253.1|ENSP00000417549.1|ENSP00000419027.1|ENSP00000419263.1|ENSP00000420759.1|ENSP00000419563.1|ENSP00000418020.1|ENSP00000419293.1	ENSG00000114054
NDUFB4	ENSG00000065518	178.922	0.623773	0.0876457	7.11699	1.1e-12	8.49e-12	ENSG00000065518.7	chr3	120596309	120602500	+	protein_coding	HAVANA	120596360	120602267	ENSP00000184266.2|ENSP00000419578.1|ENSP00000419128.1|ENSP00000417714.1|ENSP00000417755.1	ENSG00000065518	208.193	-0.453941	0.133842	-3.39162	0.000694808	0.00434024	ENSG00000065518.7	chr3	120596309	120602500	+	NDUFB4	protein_coding	HAVANA	120596360	120602267	ENSP00000184266.2|ENSP00000419578.1|ENSP00000419128.1|ENSP00000417714.1|ENSP00000417755.1	ENSG00000065518
DNAH8	ENSG00000124721	329.871	1.60139	0.231226	6.92567	4.34e-12	3.16e-11	ENSG00000124721.17	chr6	38715341	39030529	+	protein_coding	HAVANA	38722810	39030389	ENSP00000333363.7|ENSP00000362375.4|ENSP00000415331.2|ENSP00000352312.3|ENSP00000377916.3	ENSG00000124721	428.368	-0.930647	0.338688	-2.7478	0.00599965	0.0273965	ENSG00000124721.17	chr6	38715341	39030529	+	DNAH8	protein_coding	HAVANA	38722810	39030389	ENSP00000333363.7|ENSP00000362375.4|ENSP00000415331.2|ENSP00000352312.3|ENSP00000377916.3	ENSG00000124721
RP11-20B24.6	ENSG00000265908	50.9026	0.698116	0.100887	6.9198	4.52e-12	3.29e-11	ENSG00000265908.1	chr17	28944796	28945394	+	antisense	HAVANA	NA	NA		ENSG00000265908	59.896	-0.387265	0.142319	-2.72111	0.00650628	0.0292723	ENSG00000265908.1	chr17	28944796	28945394	+	RP11-20B24.6	antisense	HAVANA	NA	NA		ENSG00000265908
GP2	ENSG00000169347	190.077	2.00296	0.289909	6.90894	4.88e-12	3.54e-11	ENSG00000169347.16	chr16	20309572	20327808	-	protein_coding	HAVANA	20311226	20326431	ENSP00000304044.5|ENSP00000343861.5|ENSP00000370767.4|ENSP00000370765.5|ENSP00000460466.1|ENSP00000460124.1|ENSP00000461632.1|ENSP00000461061.1|ENSP00000460059.1	ENSG00000169347	254.986	-1.11556	0.373195	-2.98921	0.00279698	0.0143176	ENSG00000169347.16	chr16	20309572	20327808	-	GP2	protein_coding	HAVANA	20311226	20326431	ENSP00000304044.5|ENSP00000343861.5|ENSP00000370767.4|ENSP00000370765.5|ENSP00000460466.1|ENSP00000460124.1|ENSP00000461632.1|ENSP00000461061.1|ENSP00000460059.1	ENSG00000169347
FTH1P20	ENSG00000226564	43.4943	1.94607	0.283339	6.86835	6.49e-12	4.64e-11	ENSG00000226564.1	chr2	180872867	180873414	-	processed_pseudogene	HAVANA	NA	NA		ENSG00000226564	58.1089	-2.19256	0.400358	-5.47649	4.34e-08	6.58e-07	ENSG00000226564.1	chr2	180872867	180873414	-	FTH1P20	processed_pseudogene	HAVANA	NA	NA		ENSG00000226564
AIFM1	ENSG00000156709	219.988	0.425768	0.0628271	6.77682	1.23e-11	8.57e-11	ENSG00000156709.13	chrX	130129362	130165887	-	protein_coding	HAVANA|ENSEMBL	130129560	130165656	ENSP00000431222.1|ENSP00000402535.2|ENSP00000435955.1|ENSP00000316320.3|ENSP00000315122.3|ENSP00000446113.2|ENSP00000287295.3|ENSP00000432998.1	ENSG00000156709	247.823	-0.262339	0.0959187	-2.73501	0.00623778	0.0282827	ENSG00000156709.13	chrX	130129362	130165887	-	AIFM1	protein_coding	HAVANA|ENSEMBL	130129560	130165656	ENSP00000431222.1|ENSP00000402535.2|ENSP00000435955.1|ENSP00000316320.3|ENSP00000315122.3|ENSP00000446113.2|ENSP00000287295.3|ENSP00000432998.1	ENSG00000156709
IDUA	ENSG00000127415	175.004	0.660758	0.0979513	6.74578	1.52e-11	1.05e-10	ENSG00000127415.12	chr4	986997	1004506	+	protein_coding	HAVANA	987085	1004390	ENSP00000247933.4|ENSP00000422952.1|ENSP00000424847.1|ENSP00000423685.1|ENSP00000424227.1|ENSP00000425081.1	ENSG00000127415	204.796	-0.400695	0.158173	-2.53327	0.0113003	0.0461953	ENSG00000127415.12	chr4	986997	1004506	+	IDUA	protein_coding	HAVANA	987085	1004390	ENSP00000247933.4|ENSP00000422952.1|ENSP00000424847.1|ENSP00000423685.1|ENSP00000424227.1|ENSP00000425081.1	ENSG00000127415
RAB19	ENSG00000146955	26.2119	1.12805	0.167417	6.73793	1.61e-11	1.11e-10	ENSG00000146955.10	chr7	140404043	140426250	+	protein_coding	HAVANA|ENSEMBL	140407647	140426147	ENSP00000420782.1|ENSP00000440167.1|ENSP00000348778.3	ENSG00000146955	32.4331	-0.723029	0.219749	-3.29025	0.00100099	0.00595074	ENSG00000146955.10	chr7	140404043	140426250	+	RAB19	protein_coding	HAVANA|ENSEMBL	140407647	140426147	ENSP00000420782.1|ENSP00000440167.1|ENSP00000348778.3	ENSG00000146955
UQCC2	ENSG00000137288	171.077	0.468653	0.0696389	6.72976	1.7e-11	1.17e-10	ENSG00000137288.9	chr6	33694293	33711727	-	protein_coding	HAVANA	33697656	33711686	ENSP00000363348.4|ENSP00000476140.1|ENSP00000363331.3	ENSG00000137288	194.354	-0.341412	0.105908	-3.22366	0.00126563	0.00728281	ENSG00000137288.9	chr6	33694293	33711727	-	UQCC2	protein_coding	HAVANA	33697656	33711686	ENSP00000363348.4|ENSP00000476140.1|ENSP00000363331.3	ENSG00000137288
MRPL14	ENSG00000180992	71.9605	0.478081	0.0719303	6.64644	3e-11	2.02e-10	ENSG00000180992.6	chr6	44113454	44127457	-	protein_coding	HAVANA	44113846	44116611	ENSP00000361084.3	ENSG00000180992	81.8135	-0.285162	0.103976	-2.74257	0.006096	0.0277478	ENSG00000180992.6	chr6	44113454	44127457	-	MRPL14	protein_coding	HAVANA	44113846	44116611	ENSP00000361084.3	ENSG00000180992
DEGS1	ENSG00000143753	594.626	1.07089	0.161683	6.62339	3.51e-11	2.35e-10	ENSG00000143753.12	chr1	224175756	224193441	+	protein_coding	HAVANA|ENSEMBL	224175929	224192475	ENSP00000400545.1|ENSP00000316476.4|ENSP00000375749.3	ENSG00000143753	734.508	-0.71975	0.231474	-3.10942	0.00187455	0.0102106	ENSG00000143753.12	chr1	224175756	224193441	+	DEGS1	protein_coding	HAVANA|ENSEMBL	224175929	224192475	ENSP00000400545.1|ENSP00000316476.4|ENSP00000375749.3	ENSG00000143753
ZNF239	ENSG00000196793	72.3055	0.530284	0.0804452	6.59187	4.34e-11	2.89e-10	ENSG00000196793.13	chr10	43556344	43574618	-	protein_coding	HAVANA|ENSEMBL	43556706	43558079	ENSP00000307774.6|ENSP00000363569.1|ENSP00000443907.1|ENSP00000398202.1	ENSG00000196793	82.6777	-0.310256	0.114507	-2.7095	0.0067384	0.0301626	ENSG00000196793.13	chr10	43556344	43574618	-	ZNF239	protein_coding	HAVANA|ENSEMBL	43556706	43558079	ENSP00000307774.6|ENSP00000363569.1|ENSP00000443907.1|ENSP00000398202.1	ENSG00000196793
GSTZ1	ENSG00000100577	216.562	0.462173	0.0711924	6.49188	8.48e-11	5.51e-10	ENSG00000100577.18	chr14	77320884	77331597	+	protein_coding	HAVANA|ENSEMBL	77321169	77331192	ENSP00000216465.5|ENSP00000354959.4|ENSP00000452498.1|ENSP00000451927.1|ENSP00000314404.5|ENSP00000450487.1|ENSP00000451150.1|ENSP00000452531.1|ENSP00000377335.1|ENSP00000451976.1|ENSP00000452346.1|ENSP00000451850.1	ENSG00000100577	245.549	-0.325105	0.103271	-3.14807	0.00164351	0.00911465	ENSG00000100577.18	chr14	77320884	77331597	+	GSTZ1	protein_coding	HAVANA|ENSEMBL	77321169	77331192	ENSP00000216465.5|ENSP00000354959.4|ENSP00000452498.1|ENSP00000451927.1|ENSP00000314404.5|ENSP00000450487.1|ENSP00000451150.1|ENSP00000452531.1|ENSP00000377335.1|ENSP00000451976.1|ENSP00000452346.1|ENSP00000451850.1	ENSG00000100577
SMIM4	ENSG00000168273	81.4772	0.509784	0.0790814	6.44632	1.15e-10	7.35e-10	ENSG00000168273.7	chr3	52534013	52579237	+	protein_coding	HAVANA	52536756	52579043	ENSP00000305661.3|ENSP00000417806.1|ENSP00000418000.1	ENSG00000168273	93.0732	-0.319583	0.121888	-2.62193	0.00874325	0.0374244	ENSG00000168273.7	chr3	52534013	52579237	+	SMIM4	protein_coding	HAVANA	52536756	52579043	ENSP00000305661.3|ENSP00000417806.1|ENSP00000418000.1	ENSG00000168273
CTC-425K20.1	ENSG00000253946	6.71912	2.26003	0.351096	6.43707	1.22e-10	7.79e-10	ENSG00000253946.1	chr5	165905126	165905608	+	processed_pseudogene	HAVANA	NA	NA		ENSG00000253946	9.14896	-1.32283	0.434731	-3.04288	0.00234329	0.0123257	ENSG00000253946.1	chr5	165905126	165905608	+	CTC-425K20.1	processed_pseudogene	HAVANA	NA	NA		ENSG00000253946
RUVBL1	ENSG00000175792	289.322	0.39099	0.0609345	6.41657	1.39e-10	8.85e-10	ENSG00000175792.11	chr3	128064778	128153914	-	protein_coding	HAVANA	128065031	128123724	ENSP00000463669.1|ENSP00000417370.1|ENSP00000420738.1|ENSP00000318297.5|ENSP00000417254.1	ENSG00000175792	324.548	-0.404098	0.0922991	-4.37813	1.2e-05	0.000117836	ENSG00000175792.11	chr3	128064778	128153914	-	RUVBL1	protein_coding	HAVANA	128065031	128123724	ENSP00000463669.1|ENSP00000417370.1|ENSP00000420738.1|ENSP00000318297.5|ENSP00000417254.1	ENSG00000175792
EPHA6	ENSG00000080224	171.586	1.45139	0.226713	6.40188	1.53e-10	9.69e-10	ENSG00000080224.17	chr3	96814581	97752460	+	protein_coding	HAVANA	96814624	97748698	ENSP00000420598.2|ENSP00000374323.5|ENSP00000425132.1|ENSP00000421260.1|ENSP00000419470.2|ENSP00000421711.1|ENSP00000424638.1|ENSP00000423950.1|ENSP00000421353.1	ENSG00000080224	219.765	-0.711588	0.277103	-2.56796	0.01023	0.0424943	ENSG00000080224.17	chr3	96814581	97752460	+	EPHA6	protein_coding	HAVANA	96814624	97748698	ENSP00000420598.2|ENSP00000374323.5|ENSP00000425132.1|ENSP00000421260.1|ENSP00000419470.2|ENSP00000421711.1|ENSP00000424638.1|ENSP00000423950.1|ENSP00000421353.1	ENSG00000080224
MRPS33	ENSG00000090263	172.008	0.557909	0.0875763	6.37055	1.88e-10	1.18e-09	ENSG00000090263.15	chr7	141002610	141015228	-	protein_coding	HAVANA	141006433	141010633	ENSP00000320567.5|ENSP00000376732.3|ENSP00000418451.1|ENSP00000417287.1|ENSP00000420709.1	ENSG00000090263	198.068	-0.550296	0.129054	-4.26409	2.01e-05	0.000187505	ENSG00000090263.15	chr7	141002610	141015228	-	MRPS33	protein_coding	HAVANA	141006433	141010633	ENSP00000320567.5|ENSP00000376732.3|ENSP00000418451.1|ENSP00000417287.1|ENSP00000420709.1	ENSG00000090263
RP11-384F7.2	ENSG00000239268	78.825	1.32254	0.208156	6.35359	2.1e-10	1.31e-09	ENSG00000239268.2	chr3	117672154	117997592	-	lincRNA	HAVANA	NA	NA		ENSG00000239268	99.9241	-0.872494	0.250288	-3.48596	0.000490372	0.00321797	ENSG00000239268.2	chr3	117672154	117997592	-	RP11-384F7.2	lincRNA	HAVANA	NA	NA		ENSG00000239268
UNC5C	ENSG00000182168	440.085	0.752648	0.118461	6.35352	2.1e-10	1.31e-09	ENSG00000182168.14	chr4	95162504	95549206	-	protein_coding	HAVANA|ENSEMBL	95169237	95548857	ENSP00000483905.1|ENSP00000406022.1|ENSP00000426924.1|ENSP00000426153.1|ENSP00000425117.1	ENSG00000182168	521.303	-0.55921	0.158486	-3.52845	0.000418007	0.0027995	ENSG00000182168.14	chr4	95162504	95549206	-	UNC5C	protein_coding	HAVANA|ENSEMBL	95169237	95548857	ENSP00000483905.1|ENSP00000406022.1|ENSP00000426924.1|ENSP00000426153.1|ENSP00000425117.1	ENSG00000182168
RHPN1	ENSG00000158106	126.499	0.68074	0.108278	6.28699	3.24e-10	1.98e-09	ENSG00000158106.12	chr8	143368855	143384220	+	protein_coding	HAVANA|ENSEMBL	143368988	143382648	ENSP00000484724.1|ENSP00000289013.6	ENSG00000158106	148.385	-0.660356	0.158	-4.17946	2.92e-05	0.000263781	ENSG00000158106.12	chr8	143368855	143384220	+	RHPN1	protein_coding	HAVANA|ENSEMBL	143368988	143382648	ENSP00000484724.1|ENSP00000289013.6	ENSG00000158106
AGPAT3	ENSG00000160216	814.441	0.259408	0.0412944	6.28191	3.34e-10	2.04e-09	ENSG00000160216.18	chr21	43865186	43986536	+	protein_coding	HAVANA|ENSEMBL	43959682	43982389	ENSP00000291572.8|ENSP00000389318.1|ENSP00000381138.1|ENSP00000332989.2|ENSP00000412079.1|ENSP00000381140.2|ENSP00000381135.1|ENSP00000413906.1|ENSP00000394102.1|ENSP00000414440.1|ENSP00000443510.1	ENSG00000160216	893.166	-0.15488	0.0613852	-2.52308	0.0116332	0.0472077	ENSG00000160216.18	chr21	43865186	43986536	+	AGPAT3	protein_coding	HAVANA|ENSEMBL	43959682	43982389	ENSP00000291572.8|ENSP00000389318.1|ENSP00000381138.1|ENSP00000332989.2|ENSP00000412079.1|ENSP00000381140.2|ENSP00000381135.1|ENSP00000413906.1|ENSP00000394102.1|ENSP00000414440.1|ENSP00000443510.1	ENSG00000160216
XACT	ENSG00000241743	4.99701	2.80933	0.447674	6.27539	3.49e-10	2.13e-09	ENSG00000241743.2	chrX	113616300	113938218	-	lincRNA	HAVANA	NA	NA		ENSG00000241743	6.99517	-2.31695	0.550802	-4.20651	2.59e-05	0.000236637	ENSG00000241743.2	chrX	113616300	113938218	-	XACT	lincRNA	HAVANA	NA	NA		ENSG00000241743
LRRC9	ENSG00000131951	81.6749	1.4087	0.225372	6.25054	4.09e-10	2.48e-09	ENSG00000131951.10	chr14	59919713	60063559	+	protein_coding	HAVANA	59927944	60063405	ENSP00000454748.1|ENSP00000454848.1|ENSP00000457773.1|ENSP00000457559.1	ENSG00000131951	104.141	-1.26321	0.325451	-3.8814	0.000103856	0.000824167	ENSG00000131951.10	chr14	59919713	60063559	+	LRRC9	protein_coding	HAVANA	59927944	60063405	ENSP00000454748.1|ENSP00000454848.1|ENSP00000457773.1|ENSP00000457559.1	ENSG00000131951
SPATA13	ENSG00000228741	20.812	1.20932	0.193703	6.24317	4.29e-10	2.59e-09	ENSG00000228741.2	chr13	23979810	24035027	+	lincRNA	HAVANA	NA	NA		ENSG00000228741	26.0047	-1.03818	0.233724	-4.4419	8.92e-06	9.03e-05	ENSG00000228741.2	chr13	23979810	24035027	+	SPATA13	lincRNA	HAVANA	NA	NA		ENSG00000228741
AC005538.1	ENSG00000274951	2.66924	2.2782	0.367194	6.20434	5.49e-10	3.29e-09	ENSG00000274951.1	chr2	234012157	234012265	-	miRNA	ENSEMBL	NA	NA		ENSG00000274951	3.62085	-0.993408	0.387562	-2.56322	0.0103706	0.0429661	ENSG00000274951.1	chr2	234012157	234012265	-	AC005538.1	miRNA	ENSEMBL	NA	NA		ENSG00000274951
SYT1	ENSG00000067715	215.404	1.09236	0.177378	6.15837	7.35e-10	4.33e-09	ENSG00000067715.13	chr12	78863993	79452008	+	protein_coding	HAVANA	79217520	79449121	ENSP00000376932.3|ENSP00000261205.4|ENSP00000391056.2|ENSP00000447035.1|ENSP00000448964.1|ENSP00000450321.1|ENSP00000447656.1|ENSP00000447575.1|ENSP00000448861.1|ENSP00000401559.2	ENSG00000067715	266.506	-0.633525	0.239037	-2.65032	0.00804153	0.0348502	ENSG00000067715.13	chr12	78863993	79452008	+	SYT1	protein_coding	HAVANA	79217520	79449121	ENSP00000376932.3|ENSP00000261205.4|ENSP00000391056.2|ENSP00000447035.1|ENSP00000448964.1|ENSP00000450321.1|ENSP00000447656.1|ENSP00000447575.1|ENSP00000448861.1|ENSP00000401559.2	ENSG00000067715
AC016683.5	ENSG00000234174	36.6785	0.675801	0.109976	6.14501	8e-10	4.7e-09	ENSG00000234174.1	chr2	113171535	113175360	-	antisense	HAVANA	NA	NA		ENSG00000234174	42.9635	-0.420279	0.127843	-3.28746	0.00101097	0.00600077	ENSG00000234174.1	chr2	113171535	113175360	-	AC016683.5	antisense	HAVANA	NA	NA		ENSG00000234174
TTTY15	ENSG00000233864	489.679	0.699585	0.113966	6.13854	8.33e-10	4.89e-09	ENSG00000233864.7	chrY	12662334	12692233	+	lincRNA	HAVANA	NA	NA		ENSG00000233864	576.237	-0.527812	0.171931	-3.06991	0.00214124	0.0114065	ENSG00000233864.7	chrY	12662334	12692233	+	TTTY15	lincRNA	HAVANA	NA	NA		ENSG00000233864
SUDS3P1	ENSG00000249129	50.7117	0.991081	0.161876	6.12246	9.21e-10	5.39e-09	ENSG00000249129.1	chr5	177971316	177972281	+	processed_pseudogene	HAVANA	NA	NA		ENSG00000249129	61.991	-0.741662	0.23835	-3.11165	0.00186047	0.0101401	ENSG00000249129.1	chr5	177971316	177972281	+	SUDS3P1	processed_pseudogene	HAVANA	NA	NA		ENSG00000249129
RP11-423H2.3	ENSG00000249684	61.7514	0.956625	0.156325	6.11945	9.39e-10	5.49e-09	ENSG00000249684.5	chr5	177950335	177963960	+	antisense	HAVANA	NA	NA		ENSG00000249684	75.0471	-0.73588	0.237746	-3.09523	0.00196657	0.0106372	ENSG00000249684.5	chr5	177950335	177963960	+	RP11-423H2.3	antisense	HAVANA	NA	NA		ENSG00000249684
GPR158	ENSG00000151025	108.471	1.4863	0.243789	6.09666	1.08e-09	6.29e-09	ENSG00000151025.9	chr10	25175062	25602226	+	protein_coding	HAVANA	25175421	25599271	ENSP00000365529.3	ENSG00000151025	139.391	-1.06867	0.317579	-3.36507	0.000765247	0.00471902	ENSG00000151025.9	chr10	25175062	25602226	+	GPR158	protein_coding	HAVANA	25175421	25599271	ENSP00000365529.3	ENSG00000151025
APEH	ENSG00000164062	346.098	0.439495	0.0722845	6.08007	1.2e-09	6.96e-09	ENSG00000164062.12	chr3	49674002	49683963	+	protein_coding	HAVANA	49674367	49683339	ENSP00000296456.5|ENSP00000414369.1|ENSP00000410149.1|ENSP00000402365.1|ENSP00000415862.1|ENSP00000401871.1|ENSP00000410366.1|ENSP00000404353.1|ENSP00000438180.1	ENSG00000164062	391.3	-0.370089	0.113412	-3.26322	0.00110153	0.00647024	ENSG00000164062.12	chr3	49674002	49683963	+	APEH	protein_coding	HAVANA	49674367	49683339	ENSP00000296456.5|ENSP00000414369.1|ENSP00000410149.1|ENSP00000402365.1|ENSP00000415862.1|ENSP00000401871.1|ENSP00000410366.1|ENSP00000404353.1|ENSP00000438180.1	ENSG00000164062
SERPINB11	ENSG00000206072	179.05	2.16243	0.356139	6.07187	1.26e-09	7.3e-09	ENSG00000206072.12	chr18	63647579	63726432	+	protein_coding	HAVANA	63710194	63723396	ENSP00000480275.1|ENSP00000421854.1|ENSP00000441497.1|ENSP00000441708.2|ENSP00000485532.1|ENSP00000485426.1	ENSG00000206072	242.43	-1.88144	0.477384	-3.94113	8.11e-05	0.000660119	ENSG00000206072.12	chr18	63647579	63726432	+	SERPINB11	protein_coding	HAVANA	63710194	63723396	ENSP00000480275.1|ENSP00000421854.1|ENSP00000441497.1|ENSP00000441708.2|ENSP00000485532.1|ENSP00000485426.1	ENSG00000206072
EDARADD	ENSG00000186197	68.7472	1.01118	0.16681	6.06188	1.35e-09	7.75e-09	ENSG00000186197.12	chr1	236348262	236484914	+	protein_coding	HAVANA	236394445	236482646	ENSP00000405815.1|ENSP00000335076.4|ENSP00000352320.4	ENSG00000186197	84.1868	-0.788431	0.220579	-3.57436	0.00035108	0.00240547	ENSG00000186197.12	chr1	236348262	236484914	+	EDARADD	protein_coding	HAVANA	236394445	236482646	ENSP00000405815.1|ENSP00000335076.4|ENSP00000352320.4	ENSG00000186197
RP11-512G4.1	ENSG00000270289	6.76027	2.38327	0.393522	6.05625	1.39e-09	8.01e-09	ENSG00000270289.1	chr2	180473137	180473419	-	processed_pseudogene	HAVANA	NA	NA		ENSG00000270289	9.19148	-1.67843	0.490839	-3.41951	0.000627342	0.00397885	ENSG00000270289.1	chr2	180473137	180473419	-	RP11-512G4.1	processed_pseudogene	HAVANA	NA	NA		ENSG00000270289
MRPS7	ENSG00000125445	150.043	0.326483	0.0543292	6.00935	1.86e-09	1.06e-08	ENSG00000125445.10	chr17	75261674	75266373	+	protein_coding	HAVANA	75261901	75265920	ENSP00000463263.1|ENSP00000245539.6|ENSP00000463683.1|ENSP00000462677.1|ENSP00000463870.1|ENSP00000462506.1	ENSG00000125445	166.4	-0.216332	0.0803918	-2.69097	0.00712447	0.03156	ENSG00000125445.10	chr17	75261674	75266373	+	MRPS7	protein_coding	HAVANA	75261901	75265920	ENSP00000463263.1|ENSP00000245539.6|ENSP00000463683.1|ENSP00000462677.1|ENSP00000463870.1|ENSP00000462506.1	ENSG00000125445
TUSC7	ENSG00000243197	107.64	1.28367	0.214894	5.97353	2.32e-09	1.31e-08	ENSG00000243197.7	chr3	116709235	116723581	+	antisense	HAVANA	NA	NA		ENSG00000243197	135.741	-1.28422	0.271484	-4.73035	2.24e-06	2.55e-05	ENSG00000243197.7	chr3	116709235	116723581	+	TUSC7	antisense	HAVANA	NA	NA		ENSG00000243197
CTC-535M15.2	ENSG00000253693	13.5998	1.72152	0.290592	5.92419	3.14e-09	1.75e-08	ENSG00000253693.1	chr5	165349030	165778689	+	lincRNA	HAVANA	NA	NA		ENSG00000253693	17.85	-0.974669	0.356981	-2.73031	0.00632749	0.0286074	ENSG00000253693.1	chr5	165349030	165778689	+	CTC-535M15.2	lincRNA	HAVANA	NA	NA		ENSG00000253693
APOO	ENSG00000184831	54.117	0.423762	0.0719399	5.8905	3.85e-09	2.13e-08	ENSG00000184831.13	chrX	23833353	23907934	-	protein_coding	HAVANA	23840345	23907702	ENSP00000488538.1|ENSP00000368528.4|ENSP00000488146.1|ENSP00000402557.1|ENSP00000434341.1|ENSP00000488524.1	ENSG00000184831	61.0325	-0.285954	0.10119	-2.8259	0.00471475	0.0223396	ENSG00000184831.13	chrX	23833353	23907934	-	APOO	protein_coding	HAVANA	23840345	23907702	ENSP00000488538.1|ENSP00000368528.4|ENSP00000488146.1|ENSP00000402557.1|ENSP00000434341.1|ENSP00000488524.1	ENSG00000184831
LINC00467	ENSG00000153363	84.8908	0.490124	0.0836007	5.86268	4.55e-09	2.5e-08	ENSG00000153363.12	chr1	211382803	211435333	+	lincRNA	HAVANA	NA	NA		ENSG00000153363	96.71	-0.460928	0.121084	-3.80669	0.000140839	0.00107843	ENSG00000153363.12	chr1	211382803	211435333	+	LINC00467	lincRNA	HAVANA	NA	NA		ENSG00000153363
SPCS1	ENSG00000114902	255.094	0.45556	0.0777411	5.85996	4.63e-09	2.54e-08	ENSG00000114902.13	chr3	52704955	52711146	+	protein_coding	HAVANA|ENSEMBL	52706046	52707809	ENSP00000391610.1|ENSP00000478310.1|ENSP00000233025.7|ENSP00000473265.1	ENSG00000114902	289.525	-0.394173	0.113666	-3.46783	0.000524681	0.00340977	ENSG00000114902.13	chr3	52704955	52711146	+	SPCS1	protein_coding	HAVANA|ENSEMBL	52706046	52707809	ENSP00000391610.1|ENSP00000478310.1|ENSP00000233025.7|ENSP00000473265.1	ENSG00000114902
UBE2FP2	ENSG00000261199	9.11234	1.85206	0.317723	5.82917	5.57e-09	3.03e-08	ENSG00000261199.1	chr16	63180610	63181071	-	processed_pseudogene	HAVANA	NA	NA		ENSG00000261199	12.0622	-1.10529	0.413656	-2.672	0.0075401	0.0330828	ENSG00000261199.1	chr16	63180610	63181071	-	UBE2FP2	processed_pseudogene	HAVANA	NA	NA		ENSG00000261199
RP11-545E17.3	ENSG00000223478	25.6522	0.489778	0.0840667	5.82606	5.68e-09	3.08e-08	ENSG00000223478.1	chr9	128724445	128733194	+	antisense	HAVANA	NA	NA		ENSG00000223478	29.2302	-0.30998	0.113132	-2.73998	0.00614424	0.0279415	ENSG00000223478.1	chr9	128724445	128733194	+	RP11-545E17.3	antisense	HAVANA	NA	NA		ENSG00000223478
TBPL1	ENSG00000028839	160.795	0.455805	0.078569	5.80134	6.58e-09	3.54e-08	ENSG00000028839.9	chr6	133952170	133990432	+	protein_coding	HAVANA|ENSEMBL	133980126	133987037	ENSP00000402864.1|ENSP00000478795.1|ENSP00000398186.1|ENSP00000356845.1|ENSP00000237264.3|ENSP00000356843.1	ENSG00000028839	182.201	-0.301559	0.120696	-2.4985	0.012472	0.0499342	ENSG00000028839.9	chr6	133952170	133990432	+	TBPL1	protein_coding	HAVANA|ENSEMBL	133980126	133987037	ENSP00000402864.1|ENSP00000478795.1|ENSP00000398186.1|ENSP00000356845.1|ENSP00000237264.3|ENSP00000356843.1	ENSG00000028839
SUMF1	ENSG00000144455	326.014	0.301736	0.0521601	5.78481	7.26e-09	3.9e-08	ENSG00000144455.13	chr3	3700814	4467281	-	protein_coding	HAVANA	3827423	4467245	ENSP00000404384.1|ENSP00000272902.5|ENSP00000373355.5|ENSP00000410060.2|ENSP00000384977.2	ENSG00000144455	359.983	-0.209521	0.079041	-2.65079	0.00803033	0.0348204	ENSG00000144455.13	chr3	3700814	4467281	-	SUMF1	protein_coding	HAVANA	3827423	4467245	ENSP00000404384.1|ENSP00000272902.5|ENSP00000373355.5|ENSP00000410060.2|ENSP00000384977.2	ENSG00000144455
EEF1B2P8	ENSG00000230497	15.0081	1.14084	0.200666	5.68525	1.31e-08	6.86e-08	ENSG00000230497.2	chr3	175059361	175060031	-	processed_pseudogene	HAVANA	NA	NA		ENSG00000230497	18.529	-0.881779	0.235182	-3.74935	0.000177295	0.00132125	ENSG00000230497.2	chr3	175059361	175060031	-	EEF1B2P8	processed_pseudogene	HAVANA	NA	NA		ENSG00000230497
SLC33A1	ENSG00000169359	472.027	0.469588	0.0827279	5.6763	1.38e-08	7.21e-08	ENSG00000169359.13	chr3	155821024	155854429	-	protein_coding	HAVANA	155828213	155853997	ENSP00000376587.2|ENSP00000352456.3|ENSP00000419066.1|ENSP00000419165.1|ENSP00000418847.1	ENSG00000169359	536.221	-0.387382	0.131216	-2.95226	0.0031546	0.0158604	ENSG00000169359.13	chr3	155821024	155854429	-	SLC33A1	protein_coding	HAVANA	155828213	155853997	ENSP00000376587.2|ENSP00000352456.3|ENSP00000419066.1|ENSP00000419165.1|ENSP00000418847.1	ENSG00000169359
RP11-1081M5.3	ENSG00000274295	5.53958	2.17442	0.384145	5.66042	1.51e-08	7.87e-08	ENSG00000274295.1	chr8	53394215	53394795	+	processed_pseudogene	HAVANA	NA	NA		ENSG00000274295	13.4901	-2.9565	0.532777	-5.54922	2.87e-08	4.49e-07	ENSG00000274295.1	chr8	53394215	53394795	+	RP11-1081M5.3	processed_pseudogene	HAVANA	NA	NA		ENSG00000274295
RP11-1012A1.4	ENSG00000258466	3.74227	1.65768	0.295087	5.61762	1.94e-08	9.97e-08	ENSG00000258466.5	chr14	67659820	67690367	-	protein_coding	HAVANA	67659864	67690367	ENSP00000450554.1|ENSP00000450614.1	ENSG00000258466	4.87645	-1.12586	0.328141	-3.43103	0.000601291	0.00383064	ENSG00000258466.5	chr14	67659820	67690367	-	RP11-1012A1.4	protein_coding	HAVANA	67659864	67690367	ENSP00000450554.1|ENSP00000450614.1	ENSG00000258466
PIK3CB	ENSG00000051382	583.078	0.53078	0.0946569	5.60741	2.05e-08	1.05e-07	ENSG00000051382.8	chr3	138652699	138834938	-	protein_coding	HAVANA|ENSEMBL	138655392	138759343	ENSP00000289153.2|ENSP00000418143.1|ENSP00000419513.2|ENSP00000438259.1|ENSP00000420108.1|ENSP00000417869.1|ENSP00000419091.1|ENSP00000418834.1|ENSP00000419857.1|ENSP00000420399.1|ENSP00000417329.1	ENSG00000051382	668.569	-0.629652	0.14731	-4.27433	1.92e-05	0.000179989	ENSG00000051382.8	chr3	138652699	138834938	-	PIK3CB	protein_coding	HAVANA|ENSEMBL	138655392	138759343	ENSP00000289153.2|ENSP00000418143.1|ENSP00000419513.2|ENSP00000438259.1|ENSP00000420108.1|ENSP00000417869.1|ENSP00000419091.1|ENSP00000418834.1|ENSP00000419857.1|ENSP00000420399.1|ENSP00000417329.1	ENSG00000051382
HIST1H4H	ENSG00000158406	199.544	0.581651	0.103831	5.60191	2.12e-08	1.09e-07	ENSG00000158406.4	chr6	26277609	26285638	-	protein_coding	HAVANA|ENSEMBL	26285191	26285499	ENSP00000489567.1|ENSP00000489319.1|ENSP00000489236.1|ENSP00000366956.1	ENSG00000158406	230.688	-0.609838	0.157525	-3.87137	0.000108224	0.000853674	ENSG00000158406.4	chr6	26277609	26285638	-	HIST1H4H	protein_coding	HAVANA|ENSEMBL	26285191	26285499	ENSP00000489567.1|ENSP00000489319.1|ENSP00000489236.1|ENSP00000366956.1	ENSG00000158406
PSMD13	ENSG00000185627	398.75	0.368702	0.0662605	5.56442	2.63e-08	1.34e-07	ENSG00000185627.17	chr11	236546	252984	+	protein_coding	HAVANA|ENSEMBL	237050	252597	ENSP00000436186.1|ENSP00000436795.1|ENSP00000396937.2|ENSP00000433364.1|ENSP00000478756.1|ENSP00000434587.1|ENSP00000333811.5|ENSP00000372117.4|ENSP00000433115.1	ENSG00000185627	445.819	-0.268647	0.100984	-2.6603	0.0078071	0.0340257	ENSG00000185627.17	chr11	236546	252984	+	PSMD13	protein_coding	HAVANA|ENSEMBL	237050	252597	ENSP00000436186.1|ENSP00000436795.1|ENSP00000396937.2|ENSP00000433364.1|ENSP00000478756.1|ENSP00000434587.1|ENSP00000333811.5|ENSP00000372117.4|ENSP00000433115.1	ENSG00000185627
HES6	ENSG00000144485	25.0161	1.04349	0.187973	5.55126	2.84e-08	1.43e-07	ENSG00000144485.10	chr2	238238267	238240662	-	protein_coding	HAVANA	238238830	238240662	ENSP00000272937.5|ENSP00000387215.3|ENSP00000387155.3|ENSP00000387343.1|ENSP00000401797.1|ENSP00000387008.1|ENSP00000387107.1|ENSP00000392596.1|ENSP00000390870.1	ENSG00000144485	30.7996	-0.922225	0.262859	-3.50844	0.000450737	0.00298943	ENSG00000144485.10	chr2	238238267	238240662	-	HES6	protein_coding	HAVANA	238238830	238240662	ENSP00000272937.5|ENSP00000387215.3|ENSP00000387155.3|ENSP00000387343.1|ENSP00000401797.1|ENSP00000387008.1|ENSP00000387107.1|ENSP00000392596.1|ENSP00000390870.1	ENSG00000144485
CTC-459F4.1	ENSG00000261770	187.802	0.828723	0.15022	5.51673	3.45e-08	1.73e-07	ENSG00000261770.1	chr19	27757184	27760849	-	lincRNA	HAVANA	NA	NA		ENSG00000261770	224.913	-0.716454	0.226025	-3.1698	0.00152546	0.0085618	ENSG00000261770.1	chr19	27757184	27760849	-	CTC-459F4.1	lincRNA	HAVANA	NA	NA		ENSG00000261770
SSTR1	ENSG00000139874	71.1787	1.25175	0.227088	5.51219	3.54e-08	1.78e-07	ENSG00000139874.5	chr14	38207999	38213067	+	protein_coding	HAVANA	38209390	38210562	ENSP00000267377.2	ENSG00000139874	89.5286	-1.21386	0.305467	-3.97379	7.07e-05	0.00058364	ENSG00000139874.5	chr14	38207999	38213067	+	SSTR1	protein_coding	HAVANA	38209390	38210562	ENSP00000267377.2	ENSG00000139874
AKR1A1	ENSG00000117448	448.72	0.379179	0.0689611	5.49845	3.83e-08	1.92e-07	ENSG00000117448.13	chr1	45550543	45570049	+	protein_coding	HAVANA|ENSEMBL	45561795	45569953	ENSP00000361140.3|ENSP00000480713.1|ENSP00000398414.1|ENSP00000476978.1|ENSP00000312606.4|ENSP00000476713.1	ENSG00000117448	502.418	-0.325191	0.102602	-3.16944	0.00152734	0.008568	ENSG00000117448.13	chr1	45550543	45570049	+	AKR1A1	protein_coding	HAVANA|ENSEMBL	45561795	45569953	ENSP00000361140.3|ENSP00000480713.1|ENSP00000398414.1|ENSP00000476978.1|ENSP00000312606.4|ENSP00000476713.1	ENSG00000117448
EAF1	ENSG00000144597	185.327	0.505133	0.0925102	5.46029	4.75e-08	2.36e-07	ENSG00000144597.13	chr3	15427355	15450635	+	protein_coding	HAVANA	15427780	15439152	ENSP00000380054.2|ENSP00000399636.1	ENSG00000144597	211.736	-0.470536	0.143333	-3.28282	0.00102774	0.00608359	ENSG00000144597.13	chr3	15427355	15450635	+	EAF1	protein_coding	HAVANA	15427780	15439152	ENSP00000380054.2|ENSP00000399636.1	ENSG00000144597
RP11-456H18.2	ENSG00000229896	16.4296	1.10587	0.202801	5.45296	4.95e-08	2.45e-07	ENSG00000229896.2	chr6	12007670	12008856	+	lincRNA	HAVANA	NA	NA		ENSG00000229896	20.2505	-0.867285	0.265337	-3.26862	0.00108073	0.00636072	ENSG00000229896.2	chr6	12007670	12008856	+	RP11-456H18.2	lincRNA	HAVANA	NA	NA		ENSG00000229896
GPT	ENSG00000167701	89.9052	0.504205	0.0930852	5.4166	6.07e-08	2.97e-07	ENSG00000167701.13	chr8	144502973	144507174	+	protein_coding	HAVANA|ENSEMBL	144504305	144506997	ENSP00000433586.1|ENSP00000378408.2	ENSG00000167701	102.784	-0.415202	0.140915	-2.94647	0.00321427	0.0161165	ENSG00000167701.13	chr8	144502973	144507174	+	GPT	protein_coding	HAVANA|ENSEMBL	144504305	144506997	ENSP00000433586.1|ENSP00000378408.2	ENSG00000167701
C1QBP	ENSG00000108561	273.672	0.411594	0.0759904	5.41639	6.08e-08	2.98e-07	ENSG00000108561.8	chr17	5432777	5448830	-	protein_coding	HAVANA	5433018	5439073	ENSP00000225698.4|ENSP00000460308.1|ENSP00000460638.1|ENSP00000458624.1	ENSG00000108561	308.007	-0.340003	0.118211	-2.87624	0.00402447	0.0195388	ENSG00000108561.8	chr17	5432777	5448830	-	C1QBP	protein_coding	HAVANA	5433018	5439073	ENSP00000225698.4|ENSP00000460308.1|ENSP00000460638.1|ENSP00000458624.1	ENSG00000108561
MTHFS	ENSG00000136371	31.6837	0.734269	0.136246	5.38931	7.07e-08	3.44e-07	ENSG00000136371.10	chr15	79833585	79897379	-	protein_coding	HAVANA	79845213	79897364	ENSP00000454318.1|ENSP00000258874.3|ENSP00000489076.1|ENSP00000454626.1	ENSG00000136371	37.4075	-0.761574	0.195542	-3.89468	9.83e-05	0.000785081	ENSG00000136371.10	chr15	79833585	79897379	-	MTHFS	protein_coding	HAVANA	79845213	79897364	ENSP00000454318.1|ENSP00000258874.3|ENSP00000489076.1|ENSP00000454626.1	ENSG00000136371
RP11-519G16.5	ENSG00000259342	13.6692	1.53603	0.28508	5.38806	7.12e-08	3.46e-07	ENSG00000259342.1	chr15	45430652	45441808	-	antisense	HAVANA	NA	NA		ENSG00000259342	17.5883	-1.42373	0.37674	-3.77908	0.000157408	0.00118764	ENSG00000259342.1	chr15	45430652	45441808	-	RP11-519G16.5	antisense	HAVANA	NA	NA		ENSG00000259342
NCOA2	ENSG00000140396	1387.07	0.379706	0.0709494	5.35179	8.71e-08	4.2e-07	ENSG00000140396.12	chr8	70109762	70403805	-	protein_coding	HAVANA	70113635	70216745	ENSP00000399968.2|ENSP00000430148.2|ENSP00000429132.2|ENSP00000430348.1|ENSP00000430850.1	ENSG00000140396	1553.19	-0.297779	0.110073	-2.7053	0.00682434	0.0304742	ENSG00000140396.12	chr8	70109762	70403805	-	NCOA2	protein_coding	HAVANA	70113635	70216745	ENSP00000399968.2|ENSP00000430148.2|ENSP00000429132.2|ENSP00000430348.1|ENSP00000430850.1	ENSG00000140396
SDHAF3	ENSG00000196636	67.7252	0.512005	0.0957105	5.34952	8.82e-08	4.25e-07	ENSG00000196636.7	chr7	97116590	97181763	+	protein_coding	HAVANA	97117724	97181212	ENSP00000414066.2|ENSP00000353548.4	ENSG00000196636	77.157	-0.504916	0.138583	-3.64341	0.000269046	0.00190653	ENSG00000196636.7	chr7	97116590	97181763	+	SDHAF3	protein_coding	HAVANA	97117724	97181212	ENSP00000414066.2|ENSP00000353548.4	ENSG00000196636
ACY1	ENSG00000243989	37.7452	0.579796	0.108557	5.34094	9.25e-08	4.45e-07	ENSG00000243989.7	chr3	51983340	51989197	+	protein_coding	HAVANA	51984065	51989072	ENSP00000418683.1|ENSP00000419262.1|ENSP00000417056.1|ENSP00000417618.1|ENSP00000384296.2|ENSP00000419830.1	ENSG00000243989	43.3785	-0.382865	0.144656	-2.64672	0.0081276	0.0351458	ENSG00000243989.7	chr3	51983340	51989197	+	ACY1	protein_coding	HAVANA	51984065	51989072	ENSP00000418683.1|ENSP00000419262.1|ENSP00000417056.1|ENSP00000417618.1|ENSP00000384296.2|ENSP00000419830.1	ENSG00000243989
RP11-121G22.3	ENSG00000257467	58.859	1.45791	0.274829	5.30477	1.13e-07	5.38e-07	ENSG00000257467.5	chr12	81270675	81312422	+	lincRNA	HAVANA	NA	NA		ENSG00000257467	75.5008	-2.37185	0.338727	-7.00226	2.52e-12	7.06e-11	ENSG00000257467.5	chr12	81270675	81312422	+	RP11-121G22.3	lincRNA	HAVANA	NA	NA		ENSG00000257467
DNPH1	ENSG00000112667	110.104	0.369882	0.0698649	5.29424	1.2e-07	5.69e-07	ENSG00000112667.12	chr6	43225629	43229484	-	protein_coding	HAVANA	43225736	43229456	ENSP00000230431.6|ENSP00000422440.1|ENSP00000377556.2	ENSG00000112667	123.186	-0.259565	0.100955	-2.57111	0.0101374	0.0421773	ENSG00000112667.12	chr6	43225629	43229484	-	DNPH1	protein_coding	HAVANA	43225736	43229456	ENSP00000230431.6|ENSP00000422440.1|ENSP00000377556.2	ENSG00000112667
RP11-145P16.2	ENSG00000280234	15.0554	1.14261	0.216136	5.28652	1.25e-07	5.93e-07	ENSG00000280234.1	chr15	25255579	25257027	+	TEC	HAVANA	NA	NA		ENSG00000280234	18.5445	-0.65293	0.251307	-2.59813	0.00937317	0.0395791	ENSG00000280234.1	chr15	25255579	25257027	+	RP11-145P16.2	TEC	HAVANA	NA	NA		ENSG00000280234
MOSPD3	ENSG00000106330	67.1867	0.375024	0.0715883	5.23863	1.62e-07	7.6e-07	ENSG00000106330.11	chr7	100612102	100615384	+	protein_coding	HAVANA|ENSEMBL	100612792	100615180	ENSP00000223054.4|ENSP00000419535.1|ENSP00000417276.1|ENSP00000368842.2|ENSP00000377522.2|ENSP00000404626.2	ENSG00000106330	75.0193	-0.25222	0.0926806	-2.72139	0.00650088	0.029254	ENSG00000106330.11	chr7	100612102	100615384	+	MOSPD3	protein_coding	HAVANA|ENSEMBL	100612792	100615180	ENSP00000223054.4|ENSP00000419535.1|ENSP00000417276.1|ENSP00000368842.2|ENSP00000377522.2|ENSP00000404626.2	ENSG00000106330
RP11-1081M5.1	ENSG00000253369	11.0496	1.71625	0.328513	5.22431	1.75e-07	8.18e-07	ENSG00000253369.1	chr8	53395211	53395946	-	lincRNA	HAVANA	NA	NA		ENSG00000253369	27.2323	-3.03234	0.473466	-6.40455	1.51e-10	3.33e-09	ENSG00000253369.1	chr8	53395211	53395946	-	RP11-1081M5.1	lincRNA	HAVANA	NA	NA		ENSG00000253369
RP1-221C16.8	ENSG00000283064	25.0509	0.900461	0.172505	5.21991	1.79e-07	8.36e-07	ENSG00000283064.1	chr6	26160765	26172802	-	antisense	HAVANA	NA	NA		ENSG00000283064	30.1988	-0.788038	0.244318	-3.22546	0.0012577	0.0072444	ENSG00000283064.1	chr6	26160765	26172802	-	RP1-221C16.8	antisense	HAVANA	NA	NA		ENSG00000283064
KCNMB2	ENSG00000197584	27.8129	0.988808	0.190075	5.2022	1.97e-07	9.15e-07	ENSG00000197584.11	chr3	178272932	178844429	+	protein_coding	HAVANA|ENSEMBL	178807410	178842934	ENSP00000395807.1|ENSP00000408252.2|ENSP00000397483.1|ENSP00000407592.1|ENSP00000399100.1|ENSP00000414228.1|ENSP00000351068.3|ENSP00000484788.1	ENSG00000197584	33.8987	-0.732645	0.256521	-2.85608	0.00428903	0.0206273	ENSG00000197584.11	chr3	178272932	178844429	+	KCNMB2	protein_coding	HAVANA|ENSEMBL	178807410	178842934	ENSP00000395807.1|ENSP00000408252.2|ENSP00000397483.1|ENSP00000407592.1|ENSP00000399100.1|ENSP00000414228.1|ENSP00000351068.3|ENSP00000484788.1	ENSG00000197584
SAC3D1	ENSG00000168061	38.9024	0.433446	0.083568	5.18674	2.14e-07	9.91e-07	ENSG00000168061.13	chr11	65040901	65044828	+	protein_coding	HAVANA|ENSEMBL	65041154	65044724	ENSP00000436649.1|ENSP00000381824.1|ENSP00000482039.1|ENSP00000436704.1	ENSG00000168061	44.0463	-0.289423	0.105198	-2.75122	0.00593746	0.0271713	ENSG00000168061.13	chr11	65040901	65044828	+	SAC3D1	protein_coding	HAVANA|ENSEMBL	65041154	65044724	ENSP00000436649.1|ENSP00000381824.1|ENSP00000482039.1|ENSP00000436704.1	ENSG00000168061
SELT	ENSG00000198843	455.775	0.608288	0.117294	5.186	2.15e-07	9.94e-07	ENSG00000198843.12	chr3	150602875	150630445	+	protein_coding	HAVANA|ENSEMBL	150603363	150627131	ENSP00000417762.1|ENSP00000479292.1|ENSP00000418910.1|ENSP00000417932.1|ENSP00000417703.1|ENSP00000420390.1	ENSG00000198843	529.03	-0.561077	0.183821	-3.05231	0.00227089	0.0120004	ENSG00000198843.12	chr3	150602875	150630445	+	SELT	protein_coding	HAVANA|ENSEMBL	150603363	150627131	ENSP00000417762.1|ENSP00000479292.1|ENSP00000418910.1|ENSP00000417932.1|ENSP00000417703.1|ENSP00000420390.1	ENSG00000198843
SLC10A7	ENSG00000120519	238.885	0.730478	0.14132	5.16898	2.35e-07	1.08e-06	ENSG00000120519.14	chr4	146253975	146521964	-	protein_coding	HAVANA	146256494	146521717	ENSP00000411297.2|ENSP00000334594.7|ENSP00000421275.1|ENSP00000377623.4|ENSP00000421603.1|ENSP00000422577.1	ENSG00000120519	282.02	-1.10508	0.211872	-5.21581	1.83e-07	2.5e-06	ENSG00000120519.14	chr4	146253975	146521964	-	SLC10A7	protein_coding	HAVANA	146256494	146521717	ENSP00000411297.2|ENSP00000334594.7|ENSP00000421275.1|ENSP00000377623.4|ENSP00000421603.1|ENSP00000422577.1	ENSG00000120519
ATP6V1H	ENSG00000047249	282.37	0.32808	0.063517	5.16522	2.4e-07	1.11e-06	ENSG00000047249.16	chr8	53715557	53843558	-	protein_coding	HAVANA|ENSEMBL	53715967	53841690	ENSP00000347359.3|ENSP00000429947.1|ENSP00000352522.2|ENSP00000379995.2|ENSP00000428255.1|ENSP00000428625.1|ENSP00000428969.1|ENSP00000429786.1|ENSP00000427835.1|ENSP00000487194.1	ENSG00000047249	313.47	-0.265095	0.0985502	-2.68995	0.00714635	0.0316389	ENSG00000047249.16	chr8	53715557	53843558	-	ATP6V1H	protein_coding	HAVANA|ENSEMBL	53715967	53841690	ENSP00000347359.3|ENSP00000429947.1|ENSP00000352522.2|ENSP00000379995.2|ENSP00000428255.1|ENSP00000428625.1|ENSP00000428969.1|ENSP00000429786.1|ENSP00000427835.1|ENSP00000487194.1	ENSG00000047249
INTS5	ENSG00000185085	101.428	0.299798	0.0581535	5.15528	2.53e-07	1.16e-06	ENSG00000185085.2	chr11	62646848	62653302	-	protein_coding	HAVANA	62647023	62653249	ENSP00000327889.2	ENSG00000185085	112.15	-0.208645	0.0830897	-2.51109	0.012036	0.0485312	ENSG00000185085.2	chr11	62646848	62653302	-	INTS5	protein_coding	HAVANA	62647023	62653249	ENSP00000327889.2	ENSG00000185085
RP11-768G7.2	ENSG00000241213	48.9673	1.07875	0.209412	5.15134	2.59e-07	1.19e-06	ENSG00000241213.1	chr3	117678693	117690932	-	lincRNA	HAVANA	NA	NA		ENSG00000241213	60.4389	-0.890524	0.239847	-3.71289	0.000204909	0.00150153	ENSG00000241213.1	chr3	117678693	117690932	-	RP11-768G7.2	lincRNA	HAVANA	NA	NA		ENSG00000241213
SAYSD1	ENSG00000112167	146.34	0.35196	0.0685553	5.13396	2.84e-07	1.3e-06	ENSG00000112167.9	chr6	39104064	39115189	-	protein_coding	HAVANA	39105435	39115089	ENSP00000362346.1|ENSP00000229903.4	ENSG00000112167	163.064	-0.430088	0.10313	-4.17036	3.04e-05	0.000273389	ENSG00000112167.9	chr6	39104064	39115189	-	SAYSD1	protein_coding	HAVANA	39105435	39115089	ENSP00000362346.1|ENSP00000229903.4	ENSG00000112167
MEN1	ENSG00000133895	228.209	0.256441	0.0502455	5.10377	3.33e-07	1.51e-06	ENSG00000133895.14	chr11	64803510	64811294	-	protein_coding	HAVANA|ENSEMBL	64804337	64810109	ENSP00000366533.1|ENSP00000366538.1|ENSP00000366543.3|ENSP00000308975.6|ENSP00000323747.4|ENSP00000377899.2|ENSP00000377901.1|ENSP00000337088.1|ENSP00000366530.1|ENSP00000413944.1|ENSP00000394933.1|ENSP00000411218.1|ENSP00000402752.1|ENSP00000388016.1	ENSG00000133895	249.997	-0.248023	0.0726243	-3.41515	0.000637472	0.00403386	ENSG00000133895.14	chr11	64803510	64811294	-	MEN1	protein_coding	HAVANA|ENSEMBL	64804337	64810109	ENSP00000366533.1|ENSP00000366538.1|ENSP00000366543.3|ENSP00000308975.6|ENSP00000323747.4|ENSP00000377899.2|ENSP00000377901.1|ENSP00000337088.1|ENSP00000366530.1|ENSP00000413944.1|ENSP00000394933.1|ENSP00000411218.1|ENSP00000402752.1|ENSP00000388016.1	ENSG00000133895
AC092171.4	ENSG00000230733	78.0884	0.431746	0.0846297	5.10159	3.37e-07	1.53e-06	ENSG00000230733.2	chr7	5475804	5479811	+	lincRNA	HAVANA	NA	NA		ENSG00000230733	87.8438	-0.327315	0.124049	-2.63859	0.00832524	0.0359023	ENSG00000230733.2	chr7	5475804	5479811	+	AC092171.4	lincRNA	HAVANA	NA	NA		ENSG00000230733
DMRTA1	ENSG00000176399	81.5661	0.84162	0.165233	5.09353	3.51e-07	1.59e-06	ENSG00000176399.3	chr9	22446841	22455740	+	protein_coding	HAVANA	22447066	22451908	ENSP00000319651.1	ENSG00000176399	97.726	-1.14052	0.242578	-4.70164	2.58e-06	2.9e-05	ENSG00000176399.3	chr9	22446841	22455740	+	DMRTA1	protein_coding	HAVANA	22447066	22451908	ENSP00000319651.1	ENSG00000176399
ICT1	ENSG00000167862	81.1914	0.320802	0.0629965	5.09237	3.54e-07	1.6e-06	ENSG00000167862.9	chr17	75012670	75021261	+	protein_coding	HAVANA	75012687	75021002	ENSP00000462256.1|ENSP00000301585.5|ENSP00000464192.1	ENSG00000167862	89.8964	-0.270586	0.0938427	-2.8834	0.00393411	0.0191765	ENSG00000167862.9	chr17	75012670	75021261	+	ICT1	protein_coding	HAVANA	75012687	75021002	ENSP00000462256.1|ENSP00000301585.5|ENSP00000464192.1	ENSG00000167862
LINC00998	ENSG00000214194	113.757	0.553443	0.108689	5.09198	3.54e-07	1.6e-06	ENSG00000214194.8	chr7	113116718	113118613	-	lincRNA	HAVANA	NA	NA		ENSG00000214194	130.888	-0.444537	0.168862	-2.63256	0.00847449	0.036443	ENSG00000214194.8	chr7	113116718	113118613	-	LINC00998	lincRNA	HAVANA	NA	NA		ENSG00000214194
ABCC11	ENSG00000121270	154.014	1.26737	0.249602	5.07756	3.82e-07	1.72e-06	ENSG00000121270.15	chr16	48166910	48247568	-	protein_coding	HAVANA|ENSEMBL	48167277	48231921	ENSP00000311326.6|ENSP00000349017.2|ENSP00000378230.1|ENSP00000378231.1|ENSP00000456268.1	ENSG00000121270	193.545	-1.31948	0.33222	-3.97171	7.14e-05	0.000588149	ENSG00000121270.15	chr16	48166910	48247568	-	ABCC11	protein_coding	HAVANA|ENSEMBL	48167277	48231921	ENSP00000311326.6|ENSP00000349017.2|ENSP00000378230.1|ENSP00000378231.1|ENSP00000456268.1	ENSG00000121270
MIR4637	ENSG00000264792	8.56333	1.03046	0.203342	5.06762	4.03e-07	1.81e-06	ENSG00000264792.1	chr5	14825929	14826012	-	miRNA	ENSEMBL	NA	NA		ENSG00000264792	10.5267	-0.721982	0.277816	-2.59878	0.0093556	0.0395297	ENSG00000264792.1	chr5	14825929	14826012	-	MIR4637	miRNA	ENSEMBL	NA	NA		ENSG00000264792
RP11-423H2.4	ENSG00000280207	16.4759	0.883705	0.175183	5.04447	4.55e-07	2.03e-06	ENSG00000280207.1	chr5	177967004	177967457	+	lincRNA	HAVANA	NA	NA		ENSG00000280207	19.8376	-0.849058	0.23828	-3.56328	0.000366251	0.0024986	ENSG00000280207.1	chr5	177967004	177967457	+	RP11-423H2.4	lincRNA	HAVANA	NA	NA		ENSG00000280207
SI	ENSG00000090402	77.1816	1.42368	0.282313	5.04292	4.58e-07	2.05e-06	ENSG00000090402.7	chr3	164978898	165078495	-	protein_coding	HAVANA	164979365	165076012	ENSP00000264382.3|ENSP00000419450.1	ENSG00000090402	98.6532	-1.53886	0.370571	-4.15267	3.29e-05	0.000293259	ENSG00000090402.7	chr3	164978898	165078495	-	SI	protein_coding	HAVANA	164979365	165076012	ENSP00000264382.3|ENSP00000419450.1	ENSG00000090402
TFB2M	ENSG00000162851	83.5223	0.345491	0.0687018	5.02885	4.93e-07	2.19e-06	ENSG00000162851.7	chr1	246540560	246566324	-	protein_coding	HAVANA	246541034	246566138	ENSP00000355471.4	ENSG00000162851	92.9232	-0.270799	0.10004	-2.70692	0.00679101	0.030356	ENSG00000162851.7	chr1	246540560	246566324	-	TFB2M	protein_coding	HAVANA	246541034	246566138	ENSP00000355471.4	ENSG00000162851
BOP1	ENSG00000261236	183.256	0.357846	0.0713902	5.01253	5.37e-07	2.38e-06	ENSG00000261236.5	chr8	144262102	144291370	-	protein_coding	HAVANA	144262167	144291370	ENSP00000455106.1|ENSP00000456082.1	ENSG00000261236	204.309	-0.339892	0.111339	-3.05278	0.00226733	0.011983	ENSG00000261236.5	chr8	144262102	144291370	-	BOP1	protein_coding	HAVANA	144262167	144291370	ENSP00000455106.1|ENSP00000456082.1	ENSG00000261236
LSAMP-AS1	ENSG00000240922	25.7267	0.838371	0.16745	5.00668	5.54e-07	2.45e-06	ENSG00000240922.1	chr3	116360024	116370090	+	antisense	HAVANA	NA	NA		ENSG00000240922	30.8544	-0.655357	0.217309	-3.01578	0.00256317	0.013271	ENSG00000240922.1	chr3	116360024	116370090	+	LSAMP-AS1	antisense	HAVANA	NA	NA		ENSG00000240922
SLC50A1	ENSG00000169241	183.255	0.417088	0.0834274	4.99941	5.75e-07	2.54e-06	ENSG00000169241.17	chr1	155135344	155138857	+	protein_coding	HAVANA|ENSEMBL	155135672	155138278	ENSP00000420189.1|ENSP00000481368.1|ENSP00000306146.8|ENSP00000357389.4|ENSP00000357386.5	ENSG00000169241	206.475	-0.376506	0.132554	-2.8404	0.0045057	0.0215268	ENSG00000169241.17	chr1	155135344	155138857	+	SLC50A1	protein_coding	HAVANA|ENSEMBL	155135672	155138278	ENSP00000420189.1|ENSP00000481368.1|ENSP00000306146.8|ENSP00000357389.4|ENSP00000357386.5	ENSG00000169241
RP11-123O22.1	ENSG00000250064	15.8609	1.89188	0.380626	4.97045	6.68e-07	2.93e-06	ENSG00000250064.1	chr4	28435449	28600275	+	lincRNA	HAVANA	NA	NA		ENSG00000250064	21.0266	-2.1036	0.522748	-4.02411	5.72e-05	0.000483014	ENSG00000250064.1	chr4	28435449	28600275	+	RP11-123O22.1	lincRNA	HAVANA	NA	NA		ENSG00000250064
APELA	ENSG00000248329	23.2121	1.16571	0.235971	4.94006	7.81e-07	3.4e-06	ENSG00000248329.5	chr4	164877004	164898965	+	protein_coding	HAVANA	164877332	164879005	ENSP00000484618.1|ENSP00000480045.1|ENSP00000478306.1	ENSG00000248329	28.8736	-0.747133	0.282661	-2.64321	0.0082124	0.0354744	ENSG00000248329.5	chr4	164877004	164898965	+	APELA	protein_coding	HAVANA	164877332	164879005	ENSP00000484618.1|ENSP00000480045.1|ENSP00000478306.1	ENSG00000248329
RP3-431C21.1	ENSG00000236190	6.42225	2.38233	0.483699	4.92523	8.43e-07	3.65e-06	ENSG00000236190.1	chrX	86888586	86888816	+	processed_pseudogene	HAVANA	NA	NA		ENSG00000236190	15.4743	-3.18181	0.654919	-4.85832	1.18e-06	1.41e-05	ENSG00000236190.1	chrX	86888586	86888816	+	RP3-431C21.1	processed_pseudogene	HAVANA	NA	NA		ENSG00000236190
C1orf233	ENSG00000228594	18.5849	0.911933	0.185729	4.91001	9.11e-07	3.93e-06	ENSG00000228594.3	chr1	1598012	1600096	-	protein_coding	HAVANA	1599338	1600015	ENSP00000389111.1	ENSG00000228594	22.428	-0.72387	0.251109	-2.88269	0.00394293	0.0192068	ENSG00000228594.3	chr1	1598012	1600096	-	C1orf233	protein_coding	HAVANA	1599338	1600015	ENSP00000389111.1	ENSG00000228594
SLX4IP	ENSG00000149346	279.547	0.367809	0.0750334	4.90194	9.49e-07	4.09e-06	ENSG00000149346.14	chr20	10435303	10636829	+	protein_coding	HAVANA	10458205	10636361	ENSP00000335557.5|ENSP00000432784.1	ENSG00000149346	312.414	-0.353986	0.108633	-3.25856	0.00111978	0.006564	ENSG00000149346.14	chr20	10435303	10636829	+	SLX4IP	protein_coding	HAVANA	10458205	10636361	ENSP00000335557.5|ENSP00000432784.1	ENSG00000149346
RP11-768G7.1	ENSG00000240393	20.0103	1.03295	0.211242	4.88988	1.01e-06	4.33e-06	ENSG00000240393.1	chr3	117674342	117675144	-	processed_pseudogene	HAVANA	NA	NA		ENSG00000240393	24.5535	-0.993883	0.249077	-3.99026	6.6e-05	0.000549139	ENSG00000240393.1	chr3	117674342	117675144	-	RP11-768G7.1	processed_pseudogene	HAVANA	NA	NA		ENSG00000240393
MRPL44	ENSG00000135900	94.8976	0.307243	0.0631453	4.86565	1.14e-06	4.87e-06	ENSG00000135900.3	chr2	223957404	223967714	+	protein_coding	HAVANA	223957473	223967031	ENSP00000258383.3	ENSG00000135900	105.094	-0.292457	0.0857401	-3.41097	0.000647328	0.00408524	ENSG00000135900.3	chr2	223957404	223967714	+	MRPL44	protein_coding	HAVANA	223957473	223967031	ENSP00000258383.3	ENSG00000135900
PGD	ENSG00000142657	289.72	0.283837	0.0590385	4.80767	1.53e-06	6.42e-06	ENSG00000142657.20	chr1	10398592	10420144	+	protein_coding	HAVANA	10399118	10419746	ENSP00000466358.1|ENSP00000465311.1|ENSP00000270776.8|ENSP00000466156.1|ENSP00000466574.1|ENSP00000467362.1	ENSG00000142657	319.1	-0.258771	0.0876336	-2.95287	0.00314834	0.0158379	ENSG00000142657.20	chr1	10398592	10420144	+	PGD	protein_coding	HAVANA	10399118	10419746	ENSP00000466358.1|ENSP00000465311.1|ENSP00000270776.8|ENSP00000466156.1|ENSP00000466574.1|ENSP00000467362.1	ENSG00000142657
RAB26	ENSG00000167964	54.4245	0.528788	0.109999	4.8072	1.53e-06	6.43e-06	ENSG00000167964.12	chr16	2140803	2154165	+	protein_coding	HAVANA	2148784	2153902	ENSP00000454373.1|ENSP00000441580.1|ENSP00000210187.6|ENSP00000455675.1	ENSG00000167964	62.3982	-0.450653	0.155484	-2.8984	0.00375073	0.018398	ENSG00000167964.12	chr16	2140803	2154165	+	RAB26	protein_coding	HAVANA	2148784	2153902	ENSP00000454373.1|ENSP00000441580.1|ENSP00000210187.6|ENSP00000455675.1	ENSG00000167964
CBX8	ENSG00000141570	121.259	0.575479	0.119902	4.79958	1.59e-06	6.67e-06	ENSG00000141570.10	chr17	79792132	79801683	-	protein_coding	HAVANA	79794638	79798280	ENSP00000269385.4|ENSP00000405058.1|ENSP00000408753.2	ENSG00000141570	139.92	-0.597052	0.143659	-4.15604	3.24e-05	0.00028937	ENSG00000141570.10	chr17	79792132	79801683	-	CBX8	protein_coding	HAVANA	79794638	79798280	ENSP00000269385.4|ENSP00000405058.1|ENSP00000408753.2	ENSG00000141570
RP11-96H17.1	ENSG00000261502	40.4255	1.2771	0.266187	4.79775	1.6e-06	6.73e-06	ENSG00000261502.3	chr16	63056786	63129654	-	processed_transcript	HAVANA	NA	NA		ENSG00000261502	50.8136	-1.23667	0.34822	-3.5514	0.000383184	0.00260409	ENSG00000261502.3	chr16	63056786	63129654	-	RP11-96H17.1	processed_transcript	HAVANA	NA	NA		ENSG00000261502
AC009478.1	ENSG00000225258	16.6535	1.69155	0.352745	4.7954	1.62e-06	6.8e-06	ENSG00000225258.1	chr2	180571712	180692454	-	lincRNA	HAVANA	NA	NA		ENSG00000225258	21.8569	-1.65787	0.44251	-3.74651	0.000179309	0.00133469	ENSG00000225258.1	chr2	180571712	180692454	-	AC009478.1	lincRNA	HAVANA	NA	NA		ENSG00000225258
NOA1	ENSG00000084092	165.824	0.270351	0.0564434	4.78978	1.67e-06	6.99e-06	ENSG00000084092.6	chr4	56963370	56978823	-	protein_coding	HAVANA	56963453	56977585	ENSP00000264230.4	ENSG00000084092	182.076	-0.229376	0.0861592	-2.66224	0.00776228	0.033877	ENSG00000084092.6	chr4	56963370	56978823	-	NOA1	protein_coding	HAVANA	56963453	56977585	ENSP00000264230.4	ENSG00000084092
NAALADL2-AS2	ENSG00000226779	23.6183	1.04289	0.218013	4.78361	1.72e-06	7.19e-06	ENSG00000226779.1	chr3	175234861	175271096	-	antisense	HAVANA	NA	NA		ENSG00000226779	28.922	-1.10275	0.25224	-4.37184	1.23e-05	0.000121042	ENSG00000226779.1	chr3	175234861	175271096	-	NAALADL2-AS2	antisense	HAVANA	NA	NA		ENSG00000226779
CRELD2	ENSG00000184164	236.259	0.329593	0.068954	4.7799	1.75e-06	7.32e-06	ENSG00000184164.14	chr22	49918167	49927540	+	protein_coding	HAVANA	49918770	49927304	ENSP00000387769.1|ENSP00000383938.3|ENSP00000332223.4|ENSP00000386034.3|ENSP00000384111.3	ENSG00000184164	262.231	-0.314366	0.107522	-2.92374	0.0034585	0.0171662	ENSG00000184164.14	chr22	49918167	49927540	+	CRELD2	protein_coding	HAVANA	49918770	49927304	ENSP00000387769.1|ENSP00000383938.3|ENSP00000332223.4|ENSP00000386034.3|ENSP00000384111.3	ENSG00000184164
PRKG2	ENSG00000138669	132.917	1.03656	0.217284	4.77052	1.84e-06	7.65e-06	ENSG00000138669.9	chr4	81087370	81215117	-	protein_coding	HAVANA|ENSEMBL	81089711	81205047	ENSP00000439967.1|ENSP00000264399.1|ENSP00000378945.1|ENSP00000486129.1	ENSG00000138669	163.169	-1.29835	0.260749	-4.97931	6.38e-07	7.99e-06	ENSG00000138669.9	chr4	81087370	81215117	-	PRKG2	protein_coding	HAVANA|ENSEMBL	81089711	81205047	ENSP00000439967.1|ENSP00000264399.1|ENSP00000378945.1|ENSP00000486129.1	ENSG00000138669
TCTA	ENSG00000145022	228.507	0.333553	0.0700303	4.76298	1.91e-06	7.92e-06	ENSG00000145022.4	chr3	49412206	49416475	+	protein_coding	HAVANA	49412427	49414859	ENSP00000273590.3	ENSG00000145022	253.637	-0.31574	0.111217	-2.83895	0.00452625	0.0216063	ENSG00000145022.4	chr3	49412206	49416475	+	TCTA	protein_coding	HAVANA	49412427	49414859	ENSP00000273590.3	ENSG00000145022
B3GNT6	ENSG00000198488	33.7057	1.45052	0.305107	4.75414	1.99e-06	8.25e-06	ENSG00000198488.10	chr11	77034398	77041973	+	protein_coding	HAVANA	77039552	77040703	ENSP00000435628.1|ENSP00000484640.1	ENSG00000198488	43.2244	-1.56516	0.413804	-3.78237	0.000155344	0.00117407	ENSG00000198488.10	chr11	77034398	77041973	+	B3GNT6	protein_coding	HAVANA	77039552	77040703	ENSP00000435628.1|ENSP00000484640.1	ENSG00000198488
RP11-738B7.1	ENSG00000242078	7.16047	1.04344	0.219772	4.74784	2.06e-06	8.51e-06	ENSG00000242078.1	chr7	129783370	129785185	-	lincRNA	HAVANA	NA	NA		ENSG00000242078	8.70422	-0.723114	0.242401	-2.98313	0.00285321	0.014565	ENSG00000242078.1	chr7	129783370	129785185	-	RP11-738B7.1	lincRNA	HAVANA	NA	NA		ENSG00000242078
LINC00662	ENSG00000261824	312.822	0.639131	0.135204	4.72716	2.28e-06	9.38e-06	ENSG00000261824.6	chr19	27684580	27793940	-	lincRNA	HAVANA	NA	NA		ENSG00000261824	364.882	-0.663487	0.203241	-3.26454	0.00109642	0.00644279	ENSG00000261824.6	chr19	27684580	27793940	-	LINC00662	lincRNA	HAVANA	NA	NA		ENSG00000261824
ATP2A1	ENSG00000196296	227.379	0.491846	0.105016	4.68353	2.82e-06	1.15e-05	ENSG00000196296.13	chr16	28878405	28904509	+	protein_coding	HAVANA	28878672	28904202	ENSP00000349595.3|ENSP00000378879.4|ENSP00000458035.1|ENSP00000457798.1|ENSP00000443101.1|ENSP00000457357.1|ENSP00000457148.1|ENSP00000457793.1	ENSG00000196296	258.906	-0.428809	0.15026	-2.85378	0.00432025	0.0207617	ENSG00000196296.13	chr16	28878405	28904509	+	ATP2A1	protein_coding	HAVANA	28878672	28904202	ENSP00000349595.3|ENSP00000378879.4|ENSP00000458035.1|ENSP00000457798.1|ENSP00000443101.1|ENSP00000457357.1|ENSP00000457148.1|ENSP00000457793.1	ENSG00000196296
TCAIM	ENSG00000179152	331.696	0.329525	0.0704271	4.67896	2.88e-06	1.17e-05	ENSG00000179152.19	chr3	44338119	44409451	+	protein_coding	HAVANA	44354783	44407679	ENSP00000373252.3|ENSP00000402581.1|ENSP00000379388.3|ENSP00000341539.4|ENSP00000392032.2|ENSP00000489162.1|ENSP00000387842.1|ENSP00000402604.1	ENSG00000179152	367.646	-0.305063	0.109514	-2.78562	0.00534257	0.0248861	ENSG00000179152.19	chr3	44338119	44409451	+	TCAIM	protein_coding	HAVANA	44354783	44407679	ENSP00000373252.3|ENSP00000402581.1|ENSP00000379388.3|ENSP00000341539.4|ENSP00000392032.2|ENSP00000489162.1|ENSP00000387842.1|ENSP00000402604.1	ENSG00000179152
PRRT3	ENSG00000163704	103.97	0.395264	0.0852298	4.63763	3.52e-06	1.42e-05	ENSG00000163704.11	chr3	9945542	9952394	-	protein_coding	HAVANA	9946230	9950115	ENSP00000295984.3|ENSP00000392511.1|ENSP00000404512.2	ENSG00000163704	116.453	-0.335765	0.132018	-2.54333	0.01098	0.0451234	ENSG00000163704.11	chr3	9945542	9952394	-	PRRT3	protein_coding	HAVANA	9946230	9950115	ENSP00000295984.3|ENSP00000392511.1|ENSP00000404512.2	ENSG00000163704
BTD	ENSG00000169814	145.299	0.339392	0.0737654	4.60096	4.21e-06	1.68e-05	ENSG00000169814.12	chr3	15601341	15645822	+	protein_coding	HAVANA|ENSEMBL	15601405	15645485	ENSP00000397113.1|ENSP00000403775.1|ENSP00000388212.1|ENSP00000306477.5|ENSP00000400995.1|ENSP00000394277.1|ENSP00000373288.4	ENSG00000169814	161.133	-0.305908	0.111807	-2.73605	0.00621817	0.0282204	ENSG00000169814.12	chr3	15601341	15645822	+	BTD	protein_coding	HAVANA|ENSEMBL	15601405	15645485	ENSP00000397113.1|ENSP00000403775.1|ENSP00000388212.1|ENSP00000306477.5|ENSP00000400995.1|ENSP00000394277.1|ENSP00000373288.4	ENSG00000169814
RP11-617J18.1	ENSG00000258375	14.4393	1.29027	0.280825	4.59455	4.34e-06	1.73e-05	ENSG00000258375.2	chr12	81545326	81546450	-	processed_pseudogene	HAVANA	NA	NA		ENSG00000258375	18.2179	-1.88225	0.325501	-5.78263	7.35e-09	1.27e-07	ENSG00000258375.2	chr12	81545326	81546450	-	RP11-617J18.1	processed_pseudogene	HAVANA	NA	NA		ENSG00000258375
ATP8A1	ENSG00000124406	1164.26	0.437504	0.0953873	4.5866	4.51e-06	1.79e-05	ENSG00000124406.16	chr4	42408373	42657105	-	protein_coding	HAVANA	42412919	42656873	ENSP00000426495.1|ENSP00000371084.5|ENSP00000264449.10|ENSP00000421164.1|ENSP00000426935.1|ENSP00000427295.1|ENSP00000426636.1	ENSG00000124406	1316.21	-0.499504	0.139229	-3.58765	0.000333671	0.00229936	ENSG00000124406.16	chr4	42408373	42657105	-	ATP8A1	protein_coding	HAVANA	42412919	42656873	ENSP00000426495.1|ENSP00000371084.5|ENSP00000264449.10|ENSP00000421164.1|ENSP00000426935.1|ENSP00000427295.1|ENSP00000426636.1	ENSG00000124406
FAAP24	ENSG00000131944	33.2321	0.653372	0.142457	4.58644	4.51e-06	1.79e-05	ENSG00000131944.9	chr19	32972209	32978222	+	protein_coding	HAVANA	32973197	32976679	ENSP00000254262.5|ENSP00000465569.1|ENSP00000466121.1|ENSP00000465728.1|ENSP00000468475.1	ENSG00000131944	38.6549	-0.574501	0.198142	-2.89944	0.00373825	0.0183531	ENSG00000131944.9	chr19	32972209	32978222	+	FAAP24	protein_coding	HAVANA	32973197	32976679	ENSP00000254262.5|ENSP00000465569.1|ENSP00000466121.1|ENSP00000465728.1|ENSP00000468475.1	ENSG00000131944
ZNF680	ENSG00000173041	389.666	0.503596	0.110182	4.57058	4.86e-06	1.93e-05	ENSG00000173041.11	chr7	64519884	64563106	-	protein_coding	HAVANA	64521164	64562954	ENSP00000309330.6|ENSP00000393506.2	ENSG00000173041	445.113	-0.469255	0.170929	-2.74533	0.00604509	0.0275727	ENSG00000173041.11	chr7	64519884	64563106	-	ZNF680	protein_coding	HAVANA	64521164	64562954	ENSP00000309330.6|ENSP00000393506.2	ENSG00000173041
RP11-96H17.3	ENSG00000269986	3.43792	1.71895	0.377894	4.54876	5.4e-06	2.13e-05	ENSG00000269986.1	chr16	63066526	63066990	-	sense_intronic	HAVANA	NA	NA		ENSG00000269986	4.50997	-1.42049	0.466749	-3.04337	0.00233945	0.012307	ENSG00000269986.1	chr16	63066526	63066990	-	RP11-96H17.3	sense_intronic	HAVANA	NA	NA		ENSG00000269986
C8orf34	ENSG00000165084	104.704	0.811828	0.17888	4.53839	5.67e-06	2.23e-05	ENSG00000165084.15	chr8	68330722	68819022	+	protein_coding	HAVANA	68331013	68818243	ENSP00000427820.1|ENSP00000429102.1|ENSP00000345255.2|ENSP00000337174.4|ENSP00000429081.1|ENSP00000319532.3	ENSG00000165084	124.772	-0.680278	0.208509	-3.26258	0.00110404	0.00647983	ENSG00000165084.15	chr8	68330722	68819022	+	C8orf34	protein_coding	HAVANA	68331013	68818243	ENSP00000427820.1|ENSP00000429102.1|ENSP00000345255.2|ENSP00000337174.4|ENSP00000429081.1|ENSP00000319532.3	ENSG00000165084
LINC00901	ENSG00000242385	28.8778	1.01198	0.222999	4.53805	5.68e-06	2.23e-05	ENSG00000242385.1	chr3	116921431	116932238	+	antisense	HAVANA	NA	NA		ENSG00000242385	35.2764	-1.33405	0.273078	-4.88523	1.03e-06	1.24e-05	ENSG00000242385.1	chr3	116921431	116932238	+	LINC00901	antisense	HAVANA	NA	NA		ENSG00000242385
MARK2P15	ENSG00000234931	25.5318	1.48553	0.327417	4.53713	5.7e-06	2.24e-05	ENSG00000234931.1	chr10	83311628	83314475	-	processed_pseudogene	HAVANA	NA	NA		ENSG00000234931	44.4282	-2.21493	0.470688	-4.70573	2.53e-06	2.84e-05	ENSG00000234931.1	chr10	83311628	83314475	-	MARK2P15	processed_pseudogene	HAVANA	NA	NA		ENSG00000234931
GDPD1	ENSG00000153982	50.3919	0.58757	0.129514	4.53674	5.71e-06	2.25e-05	ENSG00000153982.10	chr17	59220467	59275967	+	protein_coding	HAVANA	59220610	59275195	ENSP00000462895.1|ENSP00000284116.4|ENSP00000463273.1|ENSP00000463818.1|ENSP00000464690.1|ENSP00000464351.1	ENSG00000153982	58.1615	-0.633248	0.176304	-3.5918	0.000328396	0.00226724	ENSG00000153982.10	chr17	59220467	59275967	+	GDPD1	protein_coding	HAVANA	59220610	59275195	ENSP00000462895.1|ENSP00000284116.4|ENSP00000463273.1|ENSP00000463818.1|ENSP00000464690.1|ENSP00000464351.1	ENSG00000153982
LDHD	ENSG00000166816	57.1628	0.790233	0.174862	4.51917	6.21e-06	2.43e-05	ENSG00000166816.13	chr16	75111860	75116771	-	protein_coding	HAVANA	75112359	75116720	ENSP00000300051.4|ENSP00000417011.2|ENSP00000454260.1	ENSG00000166816	67.8118	-0.667284	0.253734	-2.62986	0.00854204	0.0366908	ENSG00000166816.13	chr16	75111860	75116771	-	LDHD	protein_coding	HAVANA	75112359	75116720	ENSP00000300051.4|ENSP00000417011.2|ENSP00000454260.1	ENSG00000166816
KLK15	ENSG00000174562	32.6361	1.04467	0.231258	4.51734	6.26e-06	2.45e-05	ENSG00000174562.13	chr19	50825289	50837213	-	protein_coding	HAVANA	50825799	50831492	ENSP00000314783.4|ENSP00000469315.1|ENSP00000471164.1|ENSP00000468856.1|ENSP00000472523.1	ENSG00000174562	39.9285	-0.703941	0.273335	-2.57538	0.0100131	0.0417621	ENSG00000174562.13	chr19	50825289	50837213	-	KLK15	protein_coding	HAVANA	50825799	50831492	ENSP00000314783.4|ENSP00000469315.1|ENSP00000471164.1|ENSP00000468856.1|ENSP00000472523.1	ENSG00000174562
TKFC	ENSG00000149476	211.558	0.25611	0.0567511	4.51287	6.4e-06	2.5e-05	ENSG00000149476.14	chr11	61333210	61353295	+	protein_coding	HAVANA|ENSEMBL	61334729	61352988	ENSP00000378360.3|ENSP00000431844.2|ENSP00000434405.1|ENSP00000478735.1|ENSP00000432539.1|ENSP00000459382.1	ENSG00000149476	231.475	-0.333433	0.0797196	-4.18257	2.88e-05	0.000260361	ENSG00000149476.14	chr11	61333210	61353295	+	TKFC	protein_coding	HAVANA|ENSEMBL	61334729	61352988	ENSP00000378360.3|ENSP00000431844.2|ENSP00000434405.1|ENSP00000478735.1|ENSP00000432539.1|ENSP00000459382.1	ENSG00000149476
AC005062.2	ENSG00000243004	51.3713	1.10015	0.244394	4.50157	6.75e-06	2.63e-05	ENSG00000243004.5	chr7	19918981	20140453	-	sense_overlapping	HAVANA	NA	NA		ENSG00000243004	63.4787	-1.20997	0.351001	-3.44719	0.000566448	0.00363849	ENSG00000243004.5	chr7	19918981	20140453	-	AC005062.2	sense_overlapping	HAVANA	NA	NA		ENSG00000243004
AC067940.1	ENSG00000238259	26.4343	0.591421	0.132159	4.47507	7.64e-06	2.96e-05	ENSG00000238259.1	chr2	168231921	168232220	-	processed_pseudogene	HAVANA	NA	NA		ENSG00000238259	30.697	-0.519802	0.191798	-2.71015	0.00672529	0.0301169	ENSG00000238259.1	chr2	168231921	168232220	-	AC067940.1	processed_pseudogene	HAVANA	NA	NA		ENSG00000238259
ATP5EP1	ENSG00000250922	4.61235	1.32376	0.296191	4.46927	7.85e-06	3.04e-05	ENSG00000250922.1	chr4	105532475	105532630	+	processed_pseudogene	HAVANA	NA	NA		ENSG00000250922	5.79254	-0.845985	0.327571	-2.5826	0.00980578	0.0410636	ENSG00000250922.1	chr4	105532475	105532630	+	ATP5EP1	processed_pseudogene	HAVANA	NA	NA		ENSG00000250922
SLC26A5	ENSG00000170615	81.6779	0.609784	0.136791	4.45777	8.28e-06	3.19e-05	ENSG00000170615.14	chr7	103352730	103446177	-	protein_coding	HAVANA|ENSEMBL	103352893	103421514	ENSP00000342396.6|ENSP00000349210.4|ENSP00000377336.2|ENSP00000396833.1|ENSP00000416502.1|ENSP00000377331.1|ENSP00000304783.3|ENSP00000389733.2|ENSP00000346325.5|ENSP00000389018.1|ENSP00000395568.1|ENSP00000377330.1|ENSP00000377328.1|ENSP00000377324.1	ENSG00000170615	94.5722	-0.538371	0.18862	-2.85427	0.00431364	0.0207366	ENSG00000170615.14	chr7	103352730	103446177	-	SLC26A5	protein_coding	HAVANA|ENSEMBL	103352893	103421514	ENSP00000342396.6|ENSP00000349210.4|ENSP00000377336.2|ENSP00000396833.1|ENSP00000416502.1|ENSP00000377331.1|ENSP00000304783.3|ENSP00000389733.2|ENSP00000346325.5|ENSP00000389018.1|ENSP00000395568.1|ENSP00000377330.1|ENSP00000377328.1|ENSP00000377324.1	ENSG00000170615
GPR176	ENSG00000166073	158.955	0.507837	0.115437	4.39925	1.09e-05	4.13e-05	ENSG00000166073.8	chr15	39799023	39920892	-	protein_coding	HAVANA|ENSEMBL	39801135	39920026	ENSP00000439361.1|ENSP00000299092.3|ENSP00000453076.1	ENSG00000166073	181.633	-0.471574	0.186331	-2.53085	0.0113788	0.0464303	ENSG00000166073.8	chr15	39799023	39920892	-	GPR176	protein_coding	HAVANA|ENSEMBL	39801135	39920026	ENSP00000439361.1|ENSP00000299092.3|ENSP00000453076.1	ENSG00000166073
CICP10	ENSG00000224160	3.68314	1.02149	0.234105	4.36341	1.28e-05	4.84e-05	ENSG00000224160.1	chr2	242119856	242120053	-	processed_pseudogene	HAVANA	NA	NA		ENSG00000224160	4.53361	-0.897959	0.276987	-3.24188	0.00118745	0.0069035	ENSG00000224160.1	chr2	242119856	242120053	-	CICP10	processed_pseudogene	HAVANA	NA	NA		ENSG00000224160
BMS1P22	ENSG00000232775	5.96262	1.32236	0.304182	4.34727	1.38e-05	5.18e-05	ENSG00000232775.6	chr22	15805263	15820884	-	transcribed_unprocessed_pseudogene	HAVANA	NA	NA		ENSG00000232775	7.55706	-1.6745	0.407172	-4.11252	3.91e-05	0.000343031	ENSG00000232775.6	chr22	15805263	15820884	-	BMS1P22	transcribed_unprocessed_pseudogene	HAVANA	NA	NA		ENSG00000232775
RGS10	ENSG00000148908	249.469	0.442717	0.101954	4.34233	1.41e-05	5.29e-05	ENSG00000148908.14	chr10	119499828	119542708	-	protein_coding	HAVANA|ENSEMBL	119500116	119542638	ENSP00000376605.1|ENSP00000358097.3|ENSP00000358099.2	ENSG00000148908	282.464	-0.457302	0.154344	-2.96288	0.00304771	0.0153999	ENSG00000148908.14	chr10	119499828	119542708	-	RGS10	protein_coding	HAVANA|ENSEMBL	119500116	119542638	ENSP00000376605.1|ENSP00000358097.3|ENSP00000358099.2	ENSG00000148908
WDR12	ENSG00000138442	209.518	0.232389	0.0536702	4.32995	1.49e-05	5.58e-05	ENSG00000138442.9	chr2	202874782	203014798	-	protein_coding	HAVANA	202880863	202911476	ENSP00000261015.3	ENSG00000138442	228.224	-0.300761	0.0751327	-4.00307	6.25e-05	0.000522694	ENSG00000138442.9	chr2	202874782	203014798	-	WDR12	protein_coding	HAVANA	202880863	202911476	ENSP00000261015.3	ENSG00000138442
GLT8D1	ENSG00000016864	268.245	0.265156	0.0613615	4.32121	1.55e-05	5.8e-05	ENSG00000016864.16	chr3	52694485	52706083	-	protein_coding	HAVANA|ENSEMBL	52694771	52700460	ENSP00000266014.5|ENSP00000419612.2|ENSP00000378263.3|ENSP00000418853.1|ENSP00000418300.1|ENSP00000385730.4|ENSP00000417713.1|ENSP00000417551.2|ENSP00000420286.1|ENSP00000419094.1|ENSP00000420462.1|ENSP00000417858.1	ENSG00000016864	294.664	-0.271602	0.095347	-2.84857	0.00439167	0.0210569	ENSG00000016864.16	chr3	52694485	52706083	-	GLT8D1	protein_coding	HAVANA|ENSEMBL	52694771	52700460	ENSP00000266014.5|ENSP00000419612.2|ENSP00000378263.3|ENSP00000418853.1|ENSP00000418300.1|ENSP00000385730.4|ENSP00000417713.1|ENSP00000417551.2|ENSP00000420286.1|ENSP00000419094.1|ENSP00000420462.1|ENSP00000417858.1	ENSG00000016864
RP11-972L6.2	ENSG00000257005	5.88293	1.00158	0.235762	4.24826	2.15e-05	7.91e-05	ENSG00000257005.1	chr12	63651627	63651930	+	processed_pseudogene	HAVANA	NA	NA		ENSG00000257005	7.18056	-0.956917	0.308289	-3.10396	0.00190947	0.0103693	ENSG00000257005.1	chr12	63651627	63651930	+	RP11-972L6.2	processed_pseudogene	HAVANA	NA	NA		ENSG00000257005
RP11-62H20.1	ENSG00000261120	7.53082	1.29127	0.304727	4.23748	2.26e-05	8.29e-05	ENSG00000261120.1	chr14	59919423	59920339	-	antisense	HAVANA	NA	NA		ENSG00000261120	9.4333	-1.4127	0.401216	-3.52105	0.000429848	0.00286797	ENSG00000261120.1	chr14	59919423	59920339	-	RP11-62H20.1	antisense	HAVANA	NA	NA		ENSG00000261120
RP11-1C8.7	ENSG00000271830	2.98254	1.51141	0.356771	4.23635	2.27e-05	8.32e-05	ENSG00000271830.1	chr8	103481266	103481619	-	lincRNA	HAVANA	NA	NA		ENSG00000271830	3.82378	-1.03204	0.408799	-2.52457	0.0115841	0.0470667	ENSG00000271830.1	chr8	103481266	103481619	-	RP11-1C8.7	lincRNA	HAVANA	NA	NA		ENSG00000271830
PTRHD1	ENSG00000184924	34.7416	0.455625	0.108111	4.21441	2.5e-05	9.12e-05	ENSG00000184924.5	chr2	24789734	24793382	-	protein_coding	HAVANA	24790414	24793377	ENSP00000330389.4	ENSG00000184924	39.3444	-0.392085	0.136004	-2.8829	0.00394037	0.0191986	ENSG00000184924.5	chr2	24789734	24793382	-	PTRHD1	protein_coding	HAVANA	24790414	24793377	ENSP00000330389.4	ENSG00000184924
RALGAPA2	ENSG00000188559	2329.32	0.46496	0.111602	4.16622	3.1e-05	0.000111485	ENSG00000188559.13	chr20	20389552	20712488	-	protein_coding	HAVANA|ENSEMBL	20393102	20712480	ENSP00000400085.1|ENSP00000202677.6|ENSP00000481660.1|ENSP00000388695.1	ENSG00000188559	2646.19	-0.46172	0.173381	-2.66303	0.007744	0.0338072	ENSG00000188559.13	chr20	20389552	20712488	-	RALGAPA2	protein_coding	HAVANA|ENSEMBL	20393102	20712480	ENSP00000400085.1|ENSP00000202677.6|ENSP00000481660.1|ENSP00000388695.1	ENSG00000188559
TMEM186	ENSG00000184857	38.4087	0.346274	0.0831173	4.16609	3.1e-05	0.000111539	ENSG00000184857.7	chr16	8780384	8797648	-	protein_coding	HAVANA	8795955	8797614	ENSP00000331640.6	ENSG00000184857	42.6897	-0.326307	0.123111	-2.6505	0.00803722	0.03484	ENSG00000184857.7	chr16	8780384	8797648	-	TMEM186	protein_coding	HAVANA	8795955	8797614	ENSP00000331640.6	ENSG00000184857
RRP9	ENSG00000114767	95.5239	0.320782	0.0770293	4.16441	3.12e-05	0.000112319	ENSG00000114767.6	chr3	51933430	51941941	-	protein_coding	HAVANA	51933509	51941867	ENSP00000232888.6	ENSG00000114767	105.77	-0.359679	0.114025	-3.15439	0.00160832	0.0089565	ENSG00000114767.6	chr3	51933430	51941941	-	RRP9	protein_coding	HAVANA	51933509	51941867	ENSP00000232888.6	ENSG00000114767
HIST1H1T	ENSG00000187475	11.113	1.13522	0.272792	4.1615	3.16e-05	0.00011364	ENSG00000187475.5	chr6	26107419	26108136	-	protein_coding	HAVANA	26107473	26108093	ENSP00000341214.4	ENSG00000187475	13.7675	-0.884437	0.331532	-2.66772	0.0076367	0.0334178	ENSG00000187475.5	chr6	26107419	26108136	-	HIST1H1T	protein_coding	HAVANA	26107473	26108093	ENSP00000341214.4	ENSG00000187475
ADCK2	ENSG00000133597	117.47	0.294067	0.0710637	4.13808	3.5e-05	0.000125202	ENSG00000133597.9	chr7	140673153	140696261	+	protein_coding	HAVANA|ENSEMBL	140673331	140696182	ENSP00000072869.4|ENSP00000420512.1|ENSP00000480996.1|ENSP00000417367.1|ENSP00000420288.1	ENSG00000133597	129.321	-0.296109	0.111083	-2.66565	0.00768404	0.0335951	ENSG00000133597.9	chr7	140673153	140696261	+	ADCK2	protein_coding	HAVANA|ENSEMBL	140673331	140696182	ENSP00000072869.4|ENSP00000420512.1|ENSP00000480996.1|ENSP00000417367.1|ENSP00000420288.1	ENSG00000133597
MRPS18B	ENSG00000204568	219.574	0.210229	0.0512992	4.09809	4.17e-05	0.000147504	ENSG00000204568.11	chr6	30617709	30626395	+	protein_coding	HAVANA	30617866	30625794	ENSP00000259873.4	ENSG00000204568	238.743	-0.205002	0.0795817	-2.57599	0.00999523	0.0417003	ENSG00000204568.11	chr6	30617709	30626395	+	MRPS18B	protein_coding	HAVANA	30617866	30625794	ENSP00000259873.4	ENSG00000204568
AC093323.3	ENSG00000170846	143.221	0.289096	0.0706164	4.09389	4.24e-05	0.000150033	ENSG00000170846.16	chr4	6673451	6676047	+	lincRNA	HAVANA	NA	NA		ENSG00000170846	157.978	-0.462859	0.101114	-4.5776	4.7e-06	5.04e-05	ENSG00000170846.16	chr4	6673451	6676047	+	AC093323.3	lincRNA	HAVANA	NA	NA		ENSG00000170846
DNAJC1	ENSG00000136770	292.677	0.461249	0.112943	4.08391	4.43e-05	0.000156264	ENSG00000136770.10	chr10	21756537	22003769	-	protein_coding	HAVANA	21756690	22003434	ENSP00000366179.3|ENSP00000431248.1	ENSG00000136770	332.223	-0.487468	0.178678	-2.72818	0.00636839	0.0287512	ENSG00000136770.10	chr10	21756537	22003769	-	DNAJC1	protein_coding	HAVANA	21756690	22003434	ENSP00000366179.3|ENSP00000431248.1	ENSG00000136770
NLGN1-AS1	ENSG00000228213	30.8651	0.713336	0.176007	4.05288	5.06e-05	0.000177038	ENSG00000228213.5	chr3	173910498	173920796	-	antisense	HAVANA	NA	NA		ENSG00000228213	36.258	-0.795937	0.233161	-3.41368	0.000640909	0.00405272	ENSG00000228213.5	chr3	173910498	173920796	-	NLGN1-AS1	antisense	HAVANA	NA	NA		ENSG00000228213
RN7SL101P	ENSG00000243548	7.21811	1.39948	0.346373	4.04039	5.34e-05	0.00018618	ENSG00000243548.3	chr4	28711198	28711476	+	misc_RNA	ENSEMBL	NA	NA		ENSG00000243548	9.11598	-1.77591	0.463626	-3.83047	0.000127898	0.000988909	ENSG00000243548.3	chr4	28711198	28711476	+	RN7SL101P	misc_RNA	ENSEMBL	NA	NA		ENSG00000243548
USP9Y	ENSG00000114374	1452.46	0.455188	0.113119	4.02396	5.72e-05	0.000198849	ENSG00000114374.12	chrY	12701231	12860839	+	protein_coding	HAVANA	12709448	12859413	ENSP00000342812.3|ENSP00000406876.1	ENSG00000114374	1646.42	-0.625312	0.170326	-3.67127	0.000241352	0.00173247	ENSG00000114374.12	chrY	12701231	12860839	+	USP9Y	protein_coding	HAVANA	12709448	12859413	ENSP00000342812.3|ENSP00000406876.1	ENSG00000114374
CTB-181F24.1	ENSG00000254066	27.2314	1.0813	0.270729	3.99403	6.5e-05	0.00022382	ENSG00000254066.1	chr5	165220577	165241752	-	lincRNA	HAVANA	NA	NA		ENSG00000254066	33.5282	-1.12875	0.348539	-3.23853	0.00120148	0.00696678	ENSG00000254066.1	chr5	165220577	165241752	-	CTB-181F24.1	lincRNA	HAVANA	NA	NA		ENSG00000254066
ZNF582	ENSG00000018869	64.2587	0.285235	0.0715513	3.98644	6.71e-05	0.00023078	ENSG00000018869.16	chr19	56375846	56393545	-	protein_coding	HAVANA|ENSEMBL	56376044	56391752	ENSP00000468679.1|ENSP00000301310.3|ENSP00000483414.1|ENSP00000465619.1|ENSP00000466875.1|ENSP00000466452.1|ENSP00000465639.1	ENSG00000018869	70.7386	-0.267372	0.1015	-2.63419	0.00843381	0.0362928	ENSG00000018869.16	chr19	56375846	56393545	-	ZNF582	protein_coding	HAVANA|ENSEMBL	56376044	56391752	ENSP00000468679.1|ENSP00000301310.3|ENSP00000483414.1|ENSP00000465619.1|ENSP00000466875.1|ENSP00000466452.1|ENSP00000465639.1	ENSG00000018869
FEN1	ENSG00000168496	74.2861	0.276541	0.0697071	3.96719	7.27e-05	0.000249011	ENSG00000168496.3	chr11	61792637	61797244	+	protein_coding	HAVANA	61795362	61796924	ENSP00000305480.2|ENSP00000445692.1|ENSP00000460402.1	ENSG00000168496	81.7323	-0.384463	0.0890014	-4.31974	1.56e-05	0.00015037	ENSG00000168496.3	chr11	61792637	61797244	+	FEN1	protein_coding	HAVANA	61795362	61796924	ENSP00000305480.2|ENSP00000445692.1|ENSP00000460402.1	ENSG00000168496
ZWINT	ENSG00000122952	49.9806	0.471675	0.11991	3.93358	8.37e-05	0.000284311	ENSG00000122952.16	chr10	56357228	56361275	-	protein_coding	HAVANA|ENSEMBL	56358421	56361236	ENSP00000363055.3|ENSP00000378801.1|ENSP00000322850.2|ENSP00000473330.1|ENSP00000354921.6	ENSG00000122952	56.6797	-0.599971	0.160256	-3.74383	0.000181235	0.00134812	ENSG00000122952.16	chr10	56357228	56361275	-	ZWINT	protein_coding	HAVANA|ENSEMBL	56358421	56361236	ENSP00000363055.3|ENSP00000378801.1|ENSP00000322850.2|ENSP00000473330.1|ENSP00000354921.6	ENSG00000122952
IGSF21	ENSG00000117154	73.9042	0.702331	0.178944	3.92486	8.68e-05	0.000294171	ENSG00000117154.11	chr1	18107746	18378483	+	protein_coding	HAVANA	18108129	18378323	ENSP00000251296.1	ENSG00000117154	86.6311	-0.668044	0.258624	-2.58307	0.00979248	0.0410156	ENSG00000117154.11	chr1	18107746	18378483	+	IGSF21	protein_coding	HAVANA	18108129	18378323	ENSP00000251296.1	ENSG00000117154
TBC1D4	ENSG00000136111	1019.93	0.498759	0.127491	3.91212	9.15e-05	0.000309023	ENSG00000136111.12	chr13	75284665	75482114	-	protein_coding	HAVANA|ENSEMBL	75286795	75481767	ENSP00000366852.2|ENSP00000395986.2|ENSP00000366863.3|ENSP00000396932.1	ENSG00000136111	1164.15	-0.665376	0.193226	-3.44352	0.000574198	0.00367974	ENSG00000136111.12	chr13	75284665	75482114	-	TBC1D4	protein_coding	HAVANA|ENSEMBL	75286795	75481767	ENSP00000366852.2|ENSP00000395986.2|ENSP00000366863.3|ENSP00000396932.1	ENSG00000136111
YBEY	ENSG00000182362	93.9496	0.267552	0.0690659	3.87386	0.000107124	0.000358693	ENSG00000182362.13	chr21	46286337	46297751	+	protein_coding	HAVANA	46286914	46297631	ENSP00000380813.4|ENSP00000380808.1|ENSP00000329614.3|ENSP00000340675.6|ENSP00000380806.1|ENSP00000380805.1	ENSG00000182362	102.939	-0.267317	0.10056	-2.65829	0.0078539	0.0341825	ENSG00000182362.13	chr21	46286337	46297751	+	YBEY	protein_coding	HAVANA	46286914	46297631	ENSP00000380813.4|ENSP00000380808.1|ENSP00000329614.3|ENSP00000340675.6|ENSP00000380806.1|ENSP00000380805.1	ENSG00000182362
ABHD10	ENSG00000144827	245.607	0.347575	0.0898837	3.86694	0.00011021	0.000368467	ENSG00000144827.8	chr3	111979010	111993363	+	protein_coding	HAVANA	111979062	111991718	ENSP00000418162.1|ENSP00000273359.3|ENSP00000417880.1|ENSP00000418973.1	ENSG00000144827	273.372	-0.431536	0.140818	-3.06449	0.00218041	0.0115831	ENSG00000144827.8	chr3	111979010	111993363	+	ABHD10	protein_coding	HAVANA	111979062	111991718	ENSP00000418162.1|ENSP00000273359.3|ENSP00000417880.1|ENSP00000418973.1	ENSG00000144827
GALE	ENSG00000117308	81.0456	0.328319	0.0851769	3.85455	0.000115943	0.000386324	ENSG00000117308.14	chr1	23795599	23800804	-	protein_coding	HAVANA|ENSEMBL	23795952	23799007	ENSP00000483375.1|ENSP00000363621.3|ENSP00000397045.1|ENSP00000398585.1|ENSP00000414719.1|ENSP00000393359.1|ENSP00000398257.1	ENSG00000117308	89.762	-0.380979	0.122723	-3.10438	0.00190676	0.0103592	ENSG00000117308.14	chr1	23795599	23800804	-	GALE	protein_coding	HAVANA|ENSEMBL	23795952	23799007	ENSP00000483375.1|ENSP00000363621.3|ENSP00000397045.1|ENSP00000398585.1|ENSP00000414719.1|ENSP00000393359.1|ENSP00000398257.1	ENSG00000117308
TXNL4A	ENSG00000141759	261.563	0.216377	0.0562377	3.84754	0.000119309	0.00039679	ENSG00000141759.14	chr18	79970811	80033949	-	protein_coding	HAVANA	79973688	79988392	ENSP00000269601.4|ENSP00000465572.1|ENSP00000465321.1|ENSP00000465493.1|ENSP00000347678.4|ENSP00000466266.1|ENSP00000468761.1|ENSP00000468493.1|ENSP00000467304.1|ENSP00000466694.1	ENSG00000141759	284.604	-0.234516	0.0883527	-2.65432	0.00794691	0.0345195	ENSG00000141759.14	chr18	79970811	80033949	-	TXNL4A	protein_coding	HAVANA	79973688	79988392	ENSP00000269601.4|ENSP00000465572.1|ENSP00000465321.1|ENSP00000465493.1|ENSP00000347678.4|ENSP00000466266.1|ENSP00000468761.1|ENSP00000468493.1|ENSP00000467304.1|ENSP00000466694.1	ENSG00000141759
SPICE1	ENSG00000163611	449.775	0.208828	0.0542889	3.8466	0.000119769	0.000398232	ENSG00000163611.11	chr3	113442718	113515187	-	protein_coding	HAVANA	113445310	113506605	ENSP00000295872.4|ENSP00000420363.1|ENSP00000417944.1|ENSP00000418681.1|ENSP00000417137.1	ENSG00000163611	488.628	-0.233043	0.0848702	-2.74588	0.00603497	0.0275322	ENSG00000163611.11	chr3	113442718	113515187	-	SPICE1	protein_coding	HAVANA	113445310	113506605	ENSP00000295872.4|ENSP00000420363.1|ENSP00000417944.1|ENSP00000418681.1|ENSP00000417137.1	ENSG00000163611
TMCC1-AS1	ENSG00000271270	74.7243	0.392709	0.102348	3.83699	0.00012455	0.000413076	ENSG00000271270.5	chr3	129893871	129918575	+	antisense	HAVANA	NA	NA		ENSG00000271270	83.5375	-0.604617	0.138964	-4.35089	1.36e-05	0.000132267	ENSG00000271270.5	chr3	129893871	129918575	+	TMCC1-AS1	antisense	HAVANA	NA	NA		ENSG00000271270
C9orf163	ENSG00000196366	14.3172	0.691872	0.180909	3.82442	0.00013108	0.000433692	ENSG00000196366.3	chr9	136483495	136486067	+	lincRNA	HAVANA|ENSEMBL	NA	NA		ENSG00000196366	16.7353	-0.661669	0.222828	-2.96942	0.00298364	0.0151227	ENSG00000196366.3	chr9	136483495	136486067	+	C9orf163	lincRNA	HAVANA|ENSEMBL	NA	NA		ENSG00000196366
PLEKHB1	ENSG00000021300	163.993	0.459911	0.120385	3.82034	0.000133269	0.000440441	ENSG00000021300.13	chr11	73646178	73662819	+	protein_coding	HAVANA	73646609	73661599	ENSP00000346127.5|ENSP00000381505.4|ENSP00000440122.1|ENSP00000227214.6|ENSP00000381507.4|ENSP00000441224.1|ENSP00000443899.1|ENSP00000445990.1|ENSP00000439714.1|ENSP00000438809.1|ENSP00000445807.1|ENSP00000444453.1|ENSP00000442136.1|ENSP00000442616.1|ENSP00000440102.1|ENSP00000441558.1	ENSG00000021300	185.851	-0.684078	0.173729	-3.93761	8.23e-05	0.000669041	ENSG00000021300.13	chr11	73646178	73662819	+	PLEKHB1	protein_coding	HAVANA	73646609	73661599	ENSP00000346127.5|ENSP00000381505.4|ENSP00000440122.1|ENSP00000227214.6|ENSP00000381507.4|ENSP00000441224.1|ENSP00000443899.1|ENSP00000445990.1|ENSP00000439714.1|ENSP00000438809.1|ENSP00000445807.1|ENSP00000444453.1|ENSP00000442136.1|ENSP00000442616.1|ENSP00000440102.1|ENSP00000441558.1	ENSG00000021300
NDUFB3	ENSG00000119013	86.0158	0.252268	0.0662955	3.80521	0.000141686	0.000466309	ENSG00000119013.8	chr2	201071433	201085750	+	protein_coding	HAVANA	201078883	201085612	ENSP00000401834.1|ENSP00000237889.4|ENSP00000410600.1|ENSP00000407336.1	ENSG00000119013	94.3021	-0.361892	0.0948056	-3.81721	0.000134972	0.00103889	ENSG00000119013.8	chr2	201071433	201085750	+	NDUFB3	protein_coding	HAVANA	201078883	201085612	ENSP00000401834.1|ENSP00000237889.4|ENSP00000410600.1|ENSP00000407336.1	ENSG00000119013
ATP2A1-AS1	ENSG00000260442	4.12611	0.829374	0.218565	3.79463	0.000147862	0.000485588	ENSG00000260442.5	chr16	28878957	28879920	-	antisense	HAVANA	NA	NA		ENSG00000260442	4.95748	-0.950099	0.252346	-3.76507	0.000166503	0.00125072	ENSG00000260442.5	chr16	28878957	28879920	-	ATP2A1-AS1	antisense	HAVANA	NA	NA		ENSG00000260442
LSM3	ENSG00000170860	198.457	0.259708	0.0687325	3.77853	0.000157754	0.000515826	ENSG00000170860.3	chr3	14178358	14201119	+	protein_coding	HAVANA	14178861	14198113	ENSP00000302160.3	ENSG00000170860	217.569	-0.447039	0.100602	-4.44366	8.84e-06	8.97e-05	ENSG00000170860.3	chr3	14178358	14201119	+	LSM3	protein_coding	HAVANA	14178861	14198113	ENSP00000302160.3	ENSG00000170860
MCM4	ENSG00000104738	201.772	0.265634	0.0718973	3.69463	0.000220204	0.000705025	ENSG00000104738.16	chr8	47960185	47978160	+	protein_coding	HAVANA	47961145	47976775	ENSP00000430329.1|ENSP00000430194.1|ENSP00000262105.2|ENSP00000427829.1|ENSP00000428833.1|ENSP00000427875.1|ENSP00000430864.2	ENSG00000104738	221.193	-0.520164	0.0936736	-5.55294	2.81e-08	4.4e-07	ENSG00000104738.16	chr8	47960185	47978160	+	MCM4	protein_coding	HAVANA	47961145	47976775	ENSP00000430329.1|ENSP00000430194.1|ENSP00000262105.2|ENSP00000427829.1|ENSP00000428833.1|ENSP00000427875.1|ENSP00000430864.2	ENSG00000104738
WDR3	ENSG00000065183	349.228	0.181793	0.0493533	3.6835	0.000230051	0.000734058	ENSG00000065183.15	chr1	117929720	117966542	+	protein_coding	HAVANA|ENSEMBL	117933320	117959444	ENSP00000358449.3|ENSP00000308179.4	ENSG00000065183	377.805	-0.232557	0.071618	-3.24718	0.00116555	0.00679222	ENSG00000065183.15	chr1	117929720	117966542	+	WDR3	protein_coding	HAVANA|ENSEMBL	117933320	117959444	ENSP00000358449.3|ENSP00000308179.4	ENSG00000065183
LY6K	ENSG00000160886	13.8318	1.04204	0.282947	3.6828	0.000230687	0.000735877	ENSG00000160886.13	chr8	142700111	142705127	+	protein_coding	HAVANA	142700528	142703368	ENSP00000292430.6|ENSP00000427749.1|ENSP00000429695.1|ENSP00000428432.1	ENSG00000160886	16.9372	-1.32157	0.402118	-3.28652	0.00101434	0.00601873	ENSG00000160886.13	chr8	142700111	142705127	+	LY6K	protein_coding	HAVANA	142700528	142703368	ENSP00000292430.6|ENSP00000427749.1|ENSP00000429695.1|ENSP00000428432.1	ENSG00000160886
CSTF2	ENSG00000101811	87.7682	0.251197	0.0687579	3.65335	0.000258843	0.000819202	ENSG00000101811.13	chrX	100820359	100840932	+	protein_coding	HAVANA|ENSEMBL	100820417	100838358	ENSP00000387996.2|ENSP00000362063.2|ENSP00000432060.1|ENSP00000415705.1	ENSG00000101811	96.1701	-0.492844	0.0941413	-5.23516	1.65e-07	2.27e-06	ENSG00000101811.13	chrX	100820359	100840932	+	CSTF2	protein_coding	HAVANA|ENSEMBL	100820417	100838358	ENSP00000387996.2|ENSP00000362063.2|ENSP00000432060.1|ENSP00000415705.1	ENSG00000101811
GCDH	ENSG00000105607	165.726	0.191415	0.0525633	3.64161	0.000270941	0.000854863	ENSG00000105607.12	chr19	12891026	12914207	+	protein_coding	HAVANA	12891305	12914089	ENSP00000222214.4|ENSP00000465618.1|ENSP00000466845.1|ENSP00000468125.1|ENSP00000468452.1|ENSP00000465770.1|ENSP00000468584.1|ENSP00000468625.2|ENSP00000467735.1	ENSG00000105607	179.325	-0.262744	0.0768244	-3.42006	0.000626078	0.00397197	ENSG00000105607.12	chr19	12891026	12914207	+	GCDH	protein_coding	HAVANA	12891305	12914089	ENSP00000222214.4|ENSP00000465618.1|ENSP00000466845.1|ENSP00000468125.1|ENSP00000468452.1|ENSP00000465770.1|ENSP00000468584.1|ENSP00000468625.2|ENSP00000467735.1	ENSG00000105607
PIGP	ENSG00000185808	176.498	0.236957	0.0651919	3.63476	0.000278237	0.00087601	ENSG00000185808.13	chr21	37059170	37073170	-	protein_coding	HAVANA	37065585	37072587	ENSP00000353719.3|ENSP00000420037.1|ENSP00000382053.1|ENSP00000382054.1|ENSP00000382049.1|ENSP00000388372.1	ENSG00000185808	192.358	-0.259038	0.0949321	-2.72867	0.00635911	0.0287197	ENSG00000185808.13	chr21	37059170	37073170	-	PIGP	protein_coding	HAVANA	37065585	37072587	ENSP00000353719.3|ENSP00000420037.1|ENSP00000382053.1|ENSP00000382054.1|ENSP00000382049.1|ENSP00000388372.1	ENSG00000185808
HAX1	ENSG00000143575	275.13	0.171298	0.0472121	3.62826	0.00028534	0.000896887	ENSG00000143575.14	chr1	154272511	154275875	+	protein_coding	HAVANA	154272724	154275698	ENSP00000329002.7|ENSP00000411448.2|ENSP00000435088.1|ENSP00000403848.2|ENSP00000394920.1|ENSP00000433951.1	ENSG00000143575	296.693	-0.228109	0.0739517	-3.08457	0.00203846	0.0109445	ENSG00000143575.14	chr1	154272511	154275875	+	HAX1	protein_coding	HAVANA	154272724	154275698	ENSP00000329002.7|ENSP00000411448.2|ENSP00000435088.1|ENSP00000403848.2|ENSP00000394920.1|ENSP00000433951.1	ENSG00000143575
KIAA1024	ENSG00000169330	59.8502	0.520465	0.143971	3.61507	0.000300264	0.000940083	ENSG00000169330.8	chr15	79432516	79472290	+	protein_coding	HAVANA	79456148	79468381	ENSP00000307461.3|ENSP00000454088.1	ENSG00000169330	68.4357	-0.562734	0.187449	-3.00206	0.00268158	0.0138146	ENSG00000169330.8	chr15	79432516	79472290	+	KIAA1024	protein_coding	HAVANA	79456148	79468381	ENSP00000307461.3|ENSP00000454088.1	ENSG00000169330
RNU6-1200P	ENSG00000206889	5.04719	0.909967	0.25214	3.60898	0.000307405	0.000961011	ENSG00000206889.1	chr3	117544205	117544311	+	snRNA	ENSEMBL	NA	NA		ENSG00000206889	6.10088	-1.02437	0.311695	-3.28644	0.00101463	0.00601886	ENSG00000206889.1	chr3	117544205	117544311	+	RNU6-1200P	snRNA	ENSEMBL	NA	NA		ENSG00000206889
AC002383.2	ENSG00000227863	14.5927	0.845587	0.234496	3.60598	0.000310983	0.000971511	ENSG00000227863.2	chr7	89443974	89494262	+	lincRNA	HAVANA	NA	NA		ENSG00000227863	17.4437	-0.756184	0.270446	-2.79606	0.00517296	0.0241774	ENSG00000227863.2	chr7	89443974	89494262	+	AC002383.2	lincRNA	HAVANA	NA	NA		ENSG00000227863
YRDC	ENSG00000196449	55.2686	0.299139	0.0833185	3.59031	0.000330282	0.00102796	ENSG00000196449.3	chr1	37802944	37808185	-	protein_coding	HAVANA	37803928	37808180	ENSP00000362135.2	ENSG00000196449	60.9638	-0.339899	0.122506	-2.77454	0.00552803	0.0256046	ENSG00000196449.3	chr1	37802944	37808185	-	YRDC	protein_coding	HAVANA	37803928	37808180	ENSP00000362135.2	ENSG00000196449
SLC25A5	ENSG00000005022	278.644	0.303876	0.0848989	3.57927	0.00034456	0.00106973	ENSG00000005022.5	chrX	119468400	119471319	+	protein_coding	HAVANA	119468516	119471055	ENSP00000360671.4	ENSG00000005022	308.157	-0.335231	0.128775	-2.60323	0.00923491	0.039113	ENSG00000005022.5	chrX	119468400	119471319	+	SLC25A5	protein_coding	HAVANA	119468516	119471055	ENSP00000360671.4	ENSG00000005022
LRRTM4	ENSG00000176204	56.9435	0.915251	0.257681	3.55188	0.000382485	0.00117998	ENSG00000176204.13	chr2	76747719	77593319	-	protein_coding	HAVANA	76748698	77522115	ENSP00000387228.1|ENSP00000387297.1|ENSP00000386357.1|ENSP00000386236.3|ENSP00000386286.1|ENSP00000408722.1	ENSG00000176204	68.7221	-1.31764	0.332868	-3.95843	7.54e-05	0.000617731	ENSG00000176204.13	chr2	76747719	77593319	-	LRRTM4	protein_coding	HAVANA	76748698	77522115	ENSP00000387228.1|ENSP00000387297.1|ENSP00000386357.1|ENSP00000386236.3|ENSP00000386286.1|ENSP00000408722.1	ENSG00000176204
TEX264	ENSG00000164081	304.671	0.258228	0.0728905	3.54268	0.000396089	0.00121873	ENSG00000164081.12	chr3	51662693	51704323	+	protein_coding	HAVANA|ENSEMBL	51674305	51704013	ENSP00000408989.1|ENSP00000478139.1|ENSP00000408186.1|ENSP00000477946.1|ENSP00000340969.5|ENSP00000393736.1|ENSP00000405783.1|ENSP00000396628.1|ENSP00000378497.1|ENSP00000398802.1|ENSP00000407151.1|ENSP00000415957.1	ENSG00000164081	333.755	-0.476153	0.106781	-4.45914	8.23e-06	8.42e-05	ENSG00000164081.12	chr3	51662693	51704323	+	TEX264	protein_coding	HAVANA|ENSEMBL	51674305	51704013	ENSP00000408989.1|ENSP00000478139.1|ENSP00000408186.1|ENSP00000477946.1|ENSP00000340969.5|ENSP00000393736.1|ENSP00000405783.1|ENSP00000396628.1|ENSP00000378497.1|ENSP00000398802.1|ENSP00000407151.1|ENSP00000415957.1	ENSG00000164081
ARHGAP42P1	ENSG00000227817	13.5602	0.978711	0.277997	3.52058	0.000430602	0.00131869	ENSG00000227817.4	chr2	131328176	131330857	-	unprocessed_pseudogene	HAVANA	NA	NA		ENSG00000227817	16.487	-1.39865	0.351435	-3.97981	6.9e-05	0.00057075	ENSG00000227817.4	chr2	131328176	131330857	-	ARHGAP42P1	unprocessed_pseudogene	HAVANA	NA	NA		ENSG00000227817
SNRPD2	ENSG00000125743	263.005	0.198608	0.0564987	3.51527	0.000439312	0.00134314	ENSG00000125743.10	chr19	45687454	45692569	-	protein_coding	HAVANA	45687556	45691888	ENSP00000342374.2|ENSP00000465101.1|ENSP00000465952.1|ENSP00000466152.1|ENSP00000375798.2|ENSP00000465216.1|ENSP00000468247.1	ENSG00000125743	285.395	-0.254281	0.083723	-3.03717	0.00238813	0.0125243	ENSG00000125743.10	chr19	45687454	45692569	-	SNRPD2	protein_coding	HAVANA	45687556	45691888	ENSP00000342374.2|ENSP00000465101.1|ENSP00000465952.1|ENSP00000466152.1|ENSP00000375798.2|ENSP00000465216.1|ENSP00000468247.1	ENSG00000125743
SNORA43	ENSG00000252461	4.39461	0.675922	0.192298	3.51498	0.000439791	0.00134442	ENSG00000252461.1	chr16	28881480	28881607	-	snoRNA	ENSEMBL	NA	NA		ENSG00000252461	5.10433	-0.690487	0.228877	-3.01685	0.00255419	0.0132292	ENSG00000252461.1	chr16	28881480	28881607	-	SNORA43	snoRNA	ENSEMBL	NA	NA		ENSG00000252461
NLGN1	ENSG00000169760	170.177	0.555119	0.157971	3.51405	0.000441328	0.00134847	ENSG00000169760.17	chr3	173396284	174286644	+	protein_coding	HAVANA|ENSEMBL	173604599	174281300	ENSP00000407255.1|ENSP00000401843.1|ENSP00000392500.1|ENSP00000354541.4|ENSP00000410374.1|ENSP00000385750.4	ENSG00000169760	195.751	-0.77147	0.211908	-3.64059	0.000272017	0.00192404	ENSG00000169760.17	chr3	173396284	174286644	+	NLGN1	protein_coding	HAVANA|ENSEMBL	173604599	174281300	ENSP00000407255.1|ENSP00000401843.1|ENSP00000392500.1|ENSP00000354541.4|ENSP00000410374.1|ENSP00000385750.4	ENSG00000169760
LARS2	ENSG00000011376	266.204	0.212778	0.0607145	3.50458	0.000457334	0.0013941	ENSG00000011376.9	chr3	45388506	45549421	+	protein_coding	HAVANA	45394454	45547527	ENSP00000265537.3|ENSP00000408576.1|ENSP00000406611.1|ENSP00000412893.1|ENSP00000401388.1	ENSG00000011376	289.183	-0.291657	0.0947094	-3.07949	0.00207354	0.0111046	ENSG00000011376.9	chr3	45388506	45549421	+	LARS2	protein_coding	HAVANA	45394454	45547527	ENSP00000265537.3|ENSP00000408576.1|ENSP00000406611.1|ENSP00000412893.1|ENSP00000401388.1	ENSG00000011376
LINC01036	ENSG00000236030	15.0505	0.942226	0.271832	3.46621	0.000527847	0.00159467	ENSG00000236030.1	chr1	187092842	187360323	+	lincRNA	HAVANA	NA	NA		ENSG00000236030	18.2456	-1.31396	0.40621	-3.23467	0.00121782	0.00704954	ENSG00000236030.1	chr1	187092842	187360323	+	LINC01036	lincRNA	HAVANA	NA	NA		ENSG00000236030
FAM134B	ENSG00000154153	180.893	0.376066	0.108803	3.4564	0.000547449	0.0016504	ENSG00000154153.13	chr5	16473038	16617058	-	protein_coding	HAVANA	16474744	16616971	ENSP00000425089.1|ENSP00000382691.2|ENSP00000304642.9	ENSG00000154153	202.452	-0.719082	0.164096	-4.38208	1.18e-05	0.000115927	ENSG00000154153.13	chr5	16473038	16617058	-	FAM134B	protein_coding	HAVANA	16474744	16616971	ENSP00000425089.1|ENSP00000382691.2|ENSP00000304642.9	ENSG00000154153
GTF2IP20	ENSG00000272645	96.6453	0.236358	0.0685304	3.44895	0.000562779	0.00169338	ENSG00000272645.3	chr1	223951394	223992594	-	transcribed_unprocessed_pseudogene	HAVANA	NA	NA		ENSG00000272645	105.407	-0.28705	0.102051	-2.8128	0.00491122	0.02312	ENSG00000272645.3	chr1	223951394	223992594	-	GTF2IP20	transcribed_unprocessed_pseudogene	HAVANA	NA	NA		ENSG00000272645
RP11-337A23.6	ENSG00000253400	9.56663	1.07643	0.312163	3.44831	0.000564113	0.00169728	ENSG00000253400.1	chr9	26801733	26805862	+	lincRNA	HAVANA	NA	NA		ENSG00000253400	11.725	-1.27786	0.427337	-2.99028	0.00278725	0.0142777	ENSG00000253400.1	chr9	26801733	26805862	+	RP11-337A23.6	lincRNA	HAVANA	NA	NA		ENSG00000253400
HIST1H4I	ENSG00000276180	70.8421	0.46142	0.133891	3.44625	0.000568433	0.00170923	ENSG00000276180.1	chr6	27138588	27139881	+	protein_coding	HAVANA	27139309	27139617	ENSP00000481486.1	ENSG00000276180	80.3534	-0.913282	0.190563	-4.79255	1.65e-06	1.92e-05	ENSG00000276180.1	chr6	27138588	27139881	+	HIST1H4I	protein_coding	HAVANA	27139309	27139617	ENSP00000481486.1	ENSG00000276180
DNAJC16	ENSG00000116138	476.69	0.134606	0.0394507	3.412	0.000644883	0.00192293	ENSG00000116138.12	chr1	15526813	15592379	+	protein_coding	HAVANA|ENSEMBL	15529106	15574775	ENSP00000364998.1|ENSP00000480224.1|ENSP00000431886.1|ENSP00000365007.3|ENSP00000365009.1|ENSP00000431982.1	ENSG00000116138	510.684	-0.170178	0.0569453	-2.98844	0.00280405	0.0143488	ENSG00000116138.12	chr1	15526813	15592379	+	DNAJC16	protein_coding	HAVANA|ENSEMBL	15529106	15574775	ENSP00000364998.1|ENSP00000480224.1|ENSP00000431886.1|ENSP00000365007.3|ENSP00000365009.1|ENSP00000431982.1	ENSG00000116138
ST6GALNAC5	ENSG00000117069	52.3311	0.592392	0.174488	3.39504	0.000686194	0.00203665	ENSG00000117069.14	chr1	76867441	77065711	+	protein_coding	HAVANA	76867676	77063203	ENSP00000417583.1|ENSP00000436263.1	ENSG00000117069	60.3873	-0.851297	0.244401	-3.48319	0.000495475	0.00324713	ENSG00000117069.14	chr1	76867441	77065711	+	ST6GALNAC5	protein_coding	HAVANA	76867676	77063203	ENSP00000417583.1|ENSP00000436263.1	ENSG00000117069
AC073869.2	ENSG00000224425	7.02997	1.02444	0.302811	3.38309	0.000716753	0.00211954	ENSG00000224425.2	chr2	131352214	131353239	-	processed_pseudogene	HAVANA	NA	NA		ENSG00000224425	8.50794	-1.06693	0.36216	-2.94603	0.00321883	0.0161338	ENSG00000224425.2	chr2	131352214	131353239	-	AC073869.2	processed_pseudogene	HAVANA	NA	NA		ENSG00000224425
RP11-557L19.1	ENSG00000272002	7.13426	0.556822	0.165354	3.36745	0.00075866	0.00223555	ENSG00000272002.1	chr2	7260871	7261504	+	lincRNA	HAVANA	NA	NA		ENSG00000272002	8.15228	-0.605505	0.202166	-2.99509	0.00274365	0.0140885	ENSG00000272002.1	chr2	7260871	7261504	+	RP11-557L19.1	lincRNA	HAVANA	NA	NA		ENSG00000272002
PKIA	ENSG00000171033	146.203	0.42319	0.125838	3.36299	0.000771032	0.00227004	ENSG00000171033.12	chr8	78516139	78605267	+	protein_coding	HAVANA	78598385	78601818	ENSP00000379696.2|ENSP00000336552.5|ENSP00000430887.1	ENSG00000171033	164.775	-0.757588	0.188406	-4.02105	5.79e-05	0.000488687	ENSG00000171033.12	chr8	78516139	78605267	+	PKIA	protein_coding	HAVANA	78598385	78601818	ENSP00000379696.2|ENSP00000336552.5|ENSP00000430887.1	ENSG00000171033
LACTB2	ENSG00000147592	66.8602	0.319459	0.0953771	3.34943	0.000809777	0.00237708	ENSG00000147592.8	chr8	70635318	70669174	-	protein_coding	HAVANA	70637863	70669120	ENSP00000428801.1|ENSP00000276590.4	ENSG00000147592	73.9144	-0.470498	0.147353	-3.193	0.00140805	0.00798169	ENSG00000147592.8	chr8	70635318	70669174	-	LACTB2	protein_coding	HAVANA	70637863	70669120	ENSP00000428801.1|ENSP00000276590.4	ENSG00000147592
ZNF524	ENSG00000171443	43.8135	0.241355	0.0721197	3.34659	0.000818124	0.00239841	ENSG00000171443.6	chr19	55600022	55603138	+	protein_coding	HAVANA	55602113	55602904	ENSP00000467175.1|ENSP00000301073.2|ENSP00000466907.1	ENSG00000171443	47.9585	-0.263212	0.100981	-2.60655	0.00914595	0.0388142	ENSG00000171443.6	chr19	55600022	55603138	+	ZNF524	protein_coding	HAVANA	55602113	55602904	ENSP00000467175.1|ENSP00000301073.2|ENSP00000466907.1	ENSG00000171443
SLC25A38	ENSG00000144659	219.521	0.208408	0.0624422	3.33761	0.000845026	0.00247081	ENSG00000144659.10	chr3	39383348	39397351	+	protein_coding	HAVANA	39383725	39396517	ENSP00000273158.3|ENSP00000394244.1	ENSG00000144659	238.317	-0.290048	0.0953751	-3.04113	0.00235695	0.0123784	ENSG00000144659.10	chr3	39383348	39397351	+	SLC25A38	protein_coding	HAVANA	39383725	39396517	ENSP00000273158.3|ENSP00000394244.1	ENSG00000144659
RP11-226L15.5	ENSG00000260766	37.546	0.264188	0.0796134	3.31838	0.000905398	0.0026336	ENSG00000260766.1	chr1	160024953	160026794	-	sense_overlapping	HAVANA	NA	NA		ENSG00000260766	41.2337	-0.289947	0.113048	-2.5648	0.0103235	0.042813	ENSG00000260766.1	chr1	160024953	160026794	-	RP11-226L15.5	sense_overlapping	HAVANA	NA	NA		ENSG00000260766
MAPKAPK3	ENSG00000114738	214.209	0.225148	0.0680626	3.30796	0.000939784	0.00272789	ENSG00000114738.10	chr3	50611520	50649297	+	protein_coding	HAVANA|ENSEMBL	50617566	50648043	ENSP00000396467.1|ENSP00000410970.1|ENSP00000478922.1|ENSP00000350639.2|ENSP00000402045.1|ENSP00000394894.1	ENSG00000114738	233.096	-0.333685	0.104088	-3.2058	0.00134688	0.00768222	ENSG00000114738.10	chr3	50611520	50649297	+	MAPKAPK3	protein_coding	HAVANA|ENSEMBL	50617566	50648043	ENSP00000396467.1|ENSP00000410970.1|ENSP00000478922.1|ENSP00000350639.2|ENSP00000402045.1|ENSP00000394894.1	ENSG00000114738
RABEP2	ENSG00000177548	522.386	0.303752	0.0920449	3.30005	0.000966686	0.00280102	ENSG00000177548.12	chr16	28904421	28936526	-	protein_coding	HAVANA	28904946	28925163	ENSP00000350186.6|ENSP00000350934.4|ENSP00000442798.1|ENSP00000454968.1|ENSP00000457040.1|ENSP00000457495.1|ENSP00000454974.1|ENSP00000454510.1	ENSG00000177548	577.142	-0.446649	0.13562	-3.29339	0.000989885	0.00589102	ENSG00000177548.12	chr16	28904421	28936526	-	RABEP2	protein_coding	HAVANA	28904946	28925163	ENSP00000350186.6|ENSP00000350934.4|ENSP00000442798.1|ENSP00000454968.1|ENSP00000457040.1|ENSP00000457495.1|ENSP00000454974.1|ENSP00000454510.1	ENSG00000177548
RP11-44F14.10	ENSG00000280027	15.6343	0.472319	0.143797	3.28463	0.00102115	0.00294744	ENSG00000280027.1	chr16	53391089	53392473	+	TEC	HAVANA	NA	NA		ENSG00000280027	17.7982	-0.47349	0.189434	-2.4995	0.0124367	0.0498382	ENSG00000280027.1	chr16	53391089	53392473	+	RP11-44F14.10	TEC	HAVANA	NA	NA		ENSG00000280027
OR52Q1P	ENSG00000277514	5.83737	1.30039	0.396449	3.2801	0.00103772	0.00299312	ENSG00000277514.1	chr11	5903767	5904448	+	unprocessed_pseudogene	HAVANA	NA	NA		ENSG00000277514	7.37143	-1.61783	0.541477	-2.98781	0.00280988	0.0143703	ENSG00000277514.1	chr11	5903767	5904448	+	OR52Q1P	unprocessed_pseudogene	HAVANA	NA	NA		ENSG00000277514
ELP6	ENSG00000163832	137.868	0.161121	0.0493162	3.26711	0.00108652	0.00312291	ENSG00000163832.15	chr3	47495640	47513761	-	protein_coding	HAVANA	47496072	47513590	ENSP00000296149.4|ENSP00000390437.2|ENSP00000412593.1|ENSP00000402399.1|ENSP00000415301.1|ENSP00000406130.1|ENSP00000394673.1|ENSP00000400643.1|ENSP00000410790.1|ENSP00000402445.1	ENSG00000163832	148.458	-0.186949	0.0726134	-2.57459	0.010036	0.0418337	ENSG00000163832.15	chr3	47495640	47513761	-	ELP6	protein_coding	HAVANA	47496072	47513590	ENSP00000296149.4|ENSP00000390437.2|ENSP00000412593.1|ENSP00000402399.1|ENSP00000415301.1|ENSP00000406130.1|ENSP00000394673.1|ENSP00000400643.1|ENSP00000410790.1|ENSP00000402445.1	ENSG00000163832
MRPL55	ENSG00000162910	89.6035	0.191609	0.0587573	3.26103	0.00111009	0.00318507	ENSG00000162910.18	chr1	228106679	228109312	-	protein_coding	HAVANA|ENSEMBL	228106763	228108260	ENSP00000482290.1|ENSP00000355693.2|ENSP00000355694.1|ENSP00000355695.1|ENSP00000355696.1|ENSP00000355697.1|ENSP00000355699.1|ENSP00000355702.1|ENSP00000355701.1|ENSP00000355700.1|ENSP00000355703.1|ENSP00000355705.1|ENSP00000338189.5|ENSP00000355708.3|ENSP00000355707.3|ENSP00000355692.6|ENSP00000295008.4|ENSP00000337342.3|ENSP00000337361.5|ENSP00000375740.3|ENSP00000403614.1|ENSP00000409966.1|ENS…	ENSG00000162910	97.0614	-0.293218	0.0828426	-3.53945	0.000400957	0.00271073	ENSG00000162910.18	chr1	228106679	228109312	-	MRPL55	protein_coding	HAVANA|ENSEMBL	228106763	228108260	ENSP00000482290.1|ENSP00000355693.2|ENSP00000355694.1|ENSP00000355695.1|ENSP00000355696.1|ENSP00000355697.1|ENSP00000355699.1|ENSP00000355702.1|ENSP00000355701.1|ENSP00000355700.1|ENSP00000355703.1|ENSP00000355705.1|ENSP00000338189.5|ENSP00000355708.3|ENSP00000355707.3|ENSP00000355692.6|ENSP00000295008.4|ENSP00000337342.3|ENSP00000337361.5|ENSP00000375740.3|ENSP00000403614.1|ENSP00000409966.1|ENS…	ENSG00000162910
HNRNPA1P57	ENSG00000237442	19.0617	0.993336	0.304746	3.25955	0.00111587	0.00320021	ENSG00000237442.3	chr2	41143780	41157555	+	transcribed_processed_pseudogene	HAVANA	NA	NA		ENSG00000237442	27.2667	-1.55158	0.448101	-3.46256	0.000535053	0.00346903	ENSG00000237442.3	chr2	41143780	41157555	+	HNRNPA1P57	transcribed_processed_pseudogene	HAVANA	NA	NA		ENSG00000237442
CENPU	ENSG00000151725	61.6621	0.44491	0.136712	3.25437	0.00113644	0.00325626	ENSG00000151725.11	chr4	184694618	184734133	-	protein_coding	HAVANA	184695291	184734062	ENSP00000281453.5|ENSP00000423248.1|ENSP00000423167.1	ENSG00000151725	69.7552	-0.657835	0.192541	-3.4166	0.000634091	0.00401534	ENSG00000151725.11	chr4	184694618	184734133	-	CENPU	protein_coding	HAVANA	184695291	184734062	ENSP00000281453.5|ENSP00000423248.1|ENSP00000423167.1	ENSG00000151725
OXSM	ENSG00000151093	58.1087	0.287439	0.088871	3.23434	0.00121924	0.00347327	ENSG00000151093.7	chr3	25782917	25794534	+	protein_coding	HAVANA|ENSEMBL	25791021	25794491	ENSP00000392334.1|ENSP00000280701.3|ENSP00000404115.1|ENSP00000411303.2|ENSP00000409817.1|ENSP00000487031.1	ENSG00000151093	63.9703	-0.581051	0.126492	-4.59359	4.36e-06	4.69e-05	ENSG00000151093.7	chr3	25782917	25794534	+	OXSM	protein_coding	HAVANA|ENSEMBL	25791021	25794491	ENSP00000392334.1|ENSP00000280701.3|ENSP00000404115.1|ENSP00000411303.2|ENSP00000409817.1|ENSP00000487031.1	ENSG00000151093
RABL3	ENSG00000144840	202.388	0.179775	0.0557425	3.2251	0.00125929	0.00357723	ENSG00000144840.8	chr3	120686681	120742993	-	protein_coding	HAVANA	120689826	120742507	ENSP00000273375.3|ENSP00000419310.1|ENSP00000417266.1|ENSP00000418854.1|ENSP00000420573.1|ENSP00000419986.1	ENSG00000144840	218.609	-0.225514	0.0871997	-2.58618	0.00970468	0.0407249	ENSG00000144840.8	chr3	120686681	120742993	-	RABL3	protein_coding	HAVANA	120689826	120742507	ENSP00000273375.3|ENSP00000419310.1|ENSP00000417266.1|ENSP00000418854.1|ENSP00000420573.1|ENSP00000419986.1	ENSG00000144840
NDUFB5	ENSG00000136521	284.923	0.166354	0.052401	3.17464	0.00150021	0.00420389	ENSG00000136521.12	chr3	179604690	179627647	+	protein_coding	HAVANA|ENSEMBL	179604816	179624037	ENSP00000259037.3|ENSP00000481703.1|ENSP00000419656.1|ENSP00000419248.1|ENSP00000420538.1|ENSP00000353026.6|ENSP00000418354.1|ENSP00000419099.1|ENSP00000419501.1	ENSG00000136521	306.808	-0.258392	0.0815394	-3.16893	0.00153003	0.00858199	ENSG00000136521.12	chr3	179604690	179627647	+	NDUFB5	protein_coding	HAVANA|ENSEMBL	179604816	179624037	ENSP00000259037.3|ENSP00000481703.1|ENSP00000419656.1|ENSP00000419248.1|ENSP00000420538.1|ENSP00000353026.6|ENSP00000418354.1|ENSP00000419099.1|ENSP00000419501.1	ENSG00000136521
BRWD1-AS2	ENSG00000255568	11.323	0.422538	0.133304	3.16973	0.0015258	0.00426939	ENSG00000255568.3	chr21	39313935	39314962	+	antisense	HAVANA	NA	NA		ENSG00000255568	12.7399	-0.530244	0.177919	-2.98026	0.00288004	0.0146732	ENSG00000255568.3	chr21	39313935	39314962	+	BRWD1-AS2	antisense	HAVANA	NA	NA		ENSG00000255568
AC009478.2	ENSG00000264976	8.05625	1.27254	0.404175	3.1485	0.0016411	0.00456664	ENSG00000264976.1	chr2	180617118	180617206	-	miRNA	ENSEMBL	NA	NA		ENSG00000264976	10.1657	-1.7131	0.507116	-3.37812	0.000729831	0.004529	ENSG00000264976.1	chr2	180617118	180617206	-	AC009478.2	miRNA	ENSEMBL	NA	NA		ENSG00000264976
NIT2	ENSG00000114021	394.652	0.151989	0.0484862	3.13469	0.00172038	0.00477406	ENSG00000114021.11	chr3	100334701	100361635	+	protein_coding	HAVANA	100334792	100355265	ENSP00000377696.3|ENSP00000419157.1|ENSP00000419239.1|ENSP00000419189.1	ENSG00000114021	423.809	-0.252538	0.0723141	-3.49223	0.000479	0.00315128	ENSG00000114021.11	chr3	100334701	100361635	+	NIT2	protein_coding	HAVANA	100334792	100355265	ENSP00000377696.3|ENSP00000419157.1|ENSP00000419239.1|ENSP00000419189.1	ENSG00000114021
CTD-3020H12.4	ENSG00000271717	28.8941	0.363714	0.116256	3.12854	0.00175674	0.00486581	ENSG00000271717.1	chr19	8222153	8239648	-	antisense	HAVANA	NA	NA		ENSG00000271717	32.1971	-0.438502	0.168126	-2.60817	0.00910265	0.0386655	ENSG00000271717.1	chr19	8222153	8239648	-	CTD-3020H12.4	antisense	HAVANA	NA	NA		ENSG00000271717
AC009495.3	ENSG00000232411	16.9769	0.444203	0.142411	3.11917	0.00181362	0.00501364	ENSG00000232411.1	chr2	165833048	165839098	-	lincRNA	HAVANA	NA	NA		ENSG00000232411	19.2644	-0.506183	0.19866	-2.54799	0.0108347	0.0446091	ENSG00000232411.1	chr2	165833048	165839098	-	AC009495.3	lincRNA	HAVANA	NA	NA		ENSG00000232411
TMEM134	ENSG00000172663	237.644	0.197671	0.0637452	3.10096	0.00192894	0.00530528	ENSG00000172663.8	chr11	67461710	67469272	-	protein_coding	HAVANA	67464617	67469192	ENSP00000312615.2|ENSP00000438439.1|ENSP00000481549.1|ENSP00000377455.3|ENSP00000483083.1|ENSP00000440630.1|ENSP00000441975.1	ENSG00000172663	257.651	-0.397021	0.0878336	-4.52015	6.18e-06	6.46e-05	ENSG00000172663.8	chr11	67461710	67469272	-	TMEM134	protein_coding	HAVANA	67464617	67469192	ENSP00000312615.2|ENSP00000438439.1|ENSP00000481549.1|ENSP00000377455.3|ENSP00000483083.1|ENSP00000440630.1|ENSP00000441975.1	ENSG00000172663
DNAJB5P1	ENSG00000230335	4.15062	0.884181	0.286093	3.09053	0.00199798	0.00547951	ENSG00000230335.1	chr9	76931261	76932066	-	processed_pseudogene	HAVANA	NA	NA		ENSG00000230335	4.99257	-0.83773	0.331004	-2.53088	0.0113778	0.0464303	ENSG00000230335.1	chr9	76931261	76932066	-	DNAJB5P1	processed_pseudogene	HAVANA	NA	NA		ENSG00000230335
FOXRED2	ENSG00000100350	266.093	0.217983	0.0707734	3.08001	0.00206991	0.00566274	ENSG00000100350.14	chr22	36487190	36507101	-	protein_coding	HAVANA	36490011	36506422	ENSP00000380401.4|ENSP00000216187.6|ENSP00000380400.4|ENSP00000409692.1	ENSG00000100350	289.345	-0.358081	0.102262	-3.5016	0.000462467	0.0030575	ENSG00000100350.14	chr22	36487190	36507101	-	FOXRED2	protein_coding	HAVANA	36490011	36506422	ENSP00000380401.4|ENSP00000216187.6|ENSP00000380400.4|ENSP00000409692.1	ENSG00000100350
CLPB	ENSG00000162129	167.936	0.163441	0.0531455	3.07534	0.00210262	0.00574443	ENSG00000162129.12	chr11	72292425	72434680	-	protein_coding	HAVANA|ENSEMBL	72293370	72434474	ENSP00000294053.3|ENSP00000407296.2|ENSP00000441518.1|ENSP00000443822.1|ENSP00000340385.5|ENSP00000439746.1|ENSP00000445180.2|ENSP00000440423.1|ENSP00000442651.1|ENSP00000445327.1|ENSP00000441804.1	ENSG00000162129	180.754	-0.191885	0.0748173	-2.56472	0.010326	0.042813	ENSG00000162129.12	chr11	72292425	72434680	-	CLPB	protein_coding	HAVANA|ENSEMBL	72293370	72434474	ENSP00000294053.3|ENSP00000407296.2|ENSP00000441518.1|ENSP00000443822.1|ENSP00000340385.5|ENSP00000439746.1|ENSP00000445180.2|ENSP00000440423.1|ENSP00000442651.1|ENSP00000445327.1|ENSP00000441804.1	ENSG00000162129
TBL1XR1-AS1	ENSG00000231310	35.762	0.270303	0.0879092	3.0748	0.00210642	0.00575304	ENSG00000231310.3	chr3	177037405	177047923	+	antisense	HAVANA	NA	NA		ENSG00000231310	39.3453	-0.321351	0.128328	-2.50414	0.0122749	0.0493369	ENSG00000231310.3	chr3	177037405	177047923	+	TBL1XR1-AS1	antisense	HAVANA	NA	NA		ENSG00000231310
EEFSEC	ENSG00000132394	95.897	0.175725	0.0573804	3.06246	0.00219529	0.00597587	ENSG00000132394.10	chr3	128153454	128408646	+	protein_coding	HAVANA	128153508	128408256	ENSP00000254730.5|ENSP00000417660.1	ENSG00000132394	103.576	-0.280895	0.0828714	-3.38954	0.00070011	0.00436844	ENSG00000132394.10	chr3	128153454	128408646	+	EEFSEC	protein_coding	HAVANA	128153508	128408256	ENSP00000254730.5|ENSP00000417660.1	ENSG00000132394
UMPS	ENSG00000114491	265.248	0.151751	0.0497239	3.05188	0.0022741	0.00616953	ENSG00000114491.13	chr3	124730366	124749273	+	protein_coding	HAVANA|ENSEMBL	124730472	124744081	ENSP00000232607.2|ENSP00000417893.1|ENSP00000486143.1|ENSP00000419618.1|ENSP00000420348.1|ENSP00000419121.1|ENSP00000420409.1|ENSP00000420754.1	ENSG00000114491	285.111	-0.323731	0.0712554	-4.54325	5.54e-06	5.84e-05	ENSG00000114491.13	chr3	124730366	124749273	+	UMPS	protein_coding	HAVANA|ENSEMBL	124730472	124744081	ENSP00000232607.2|ENSP00000417893.1|ENSP00000486143.1|ENSP00000419618.1|ENSP00000420348.1|ENSP00000419121.1|ENSP00000420409.1|ENSP00000420754.1	ENSG00000114491
PPAT	ENSG00000128059	125.468	0.201148	0.0667447	3.01369	0.00258092	0.00692766	ENSG00000128059.8	chr4	56393362	56435615	-	protein_coding	HAVANA	56395355	56435477	ENSP00000264220.2|ENSP00000423781.1|ENSP00000425119.1	ENSG00000128059	136.068	-0.30098	0.0964324	-3.12115	0.00180145	0.00986213	ENSG00000128059.8	chr4	56393362	56435615	-	PPAT	protein_coding	HAVANA	56395355	56435477	ENSP00000264220.2|ENSP00000423781.1|ENSP00000425119.1	ENSG00000128059
CCNL2P1	ENSG00000248283	49.2933	0.342002	0.113552	3.01186	0.00259649	0.00696734	ENSG00000248283.2	chr4	42561457	42562425	-	processed_pseudogene	HAVANA	NA	NA		ENSG00000248283	54.8608	-0.596553	0.160708	-3.71203	0.000205604	0.00150637	ENSG00000248283.2	chr4	42561457	42562425	-	CCNL2P1	processed_pseudogene	HAVANA	NA	NA		ENSG00000248283
SLC25A17	ENSG00000100372	182.336	0.160279	0.0534059	3.00114	0.00268972	0.00720268	ENSG00000100372.14	chr22	40769630	40819399	-	protein_coding	HAVANA|ENSEMBL	40770837	40819248	ENSP00000263255.6|ENSP00000390722.2|ENSP00000438355.2|ENSP00000385303.3|ENSP00000390502.1|ENSP00000394539.1|ENSP00000407096.1|ENSP00000416618.1|ENSP00000387478.1|ENSP00000414908.1|ENSP00000400053.1|ENSP00000388966.1|ENSP00000410565.1|ENSP00000409781.1|ENSP00000404200.1	ENSG00000100372	196.436	-0.280999	0.0773635	-3.63219	0.000281021	0.00197778	ENSG00000100372.14	chr22	40769630	40819399	-	SLC25A17	protein_coding	HAVANA|ENSEMBL	40770837	40819248	ENSP00000263255.6|ENSP00000390722.2|ENSP00000438355.2|ENSP00000385303.3|ENSP00000390502.1|ENSP00000394539.1|ENSP00000407096.1|ENSP00000416618.1|ENSP00000387478.1|ENSP00000414908.1|ENSP00000400053.1|ENSP00000388966.1|ENSP00000410565.1|ENSP00000409781.1|ENSP00000404200.1	ENSG00000100372
C1orf109	ENSG00000116922	122.189	0.182219	0.06083	2.99555	0.00273953	0.00732278	ENSG00000116922.14	chr1	37681570	37692249	-	protein_coding	HAVANA	37683126	37689880	ENSP00000350704.4|ENSP00000477273.1|ENSP00000477159.1|ENSP00000477011.1|ENSP00000476934.1|ENSP00000476341.1|ENSP00000476779.1|ENSP00000477078.2|ENSP00000479011.1	ENSG00000116922	131.666	-0.258175	0.0871003	-2.96411	0.00303563	0.0153507	ENSG00000116922.14	chr1	37681570	37692249	-	C1orf109	protein_coding	HAVANA	37683126	37689880	ENSP00000350704.4|ENSP00000477273.1|ENSP00000477159.1|ENSP00000477011.1|ENSP00000476934.1|ENSP00000476341.1|ENSP00000476779.1|ENSP00000477078.2|ENSP00000479011.1	ENSG00000116922
ATIC	ENSG00000138363	316.137	0.192824	0.0645997	2.98491	0.00283662	0.00756358	ENSG00000138363.14	chr2	215311817	215349773	+	protein_coding	HAVANA	215312143	215349652	ENSP00000236959.9|ENSP00000388675.1|ENSP00000406792.1|ENSP00000415935.1|ENSP00000394317.1|ENSP00000402393.1|ENSP00000401936.1	ENSG00000138363	342.782	-0.252341	0.0981304	-2.57149	0.0101262	0.0421344	ENSG00000138363.14	chr2	215311817	215349773	+	ATIC	protein_coding	HAVANA	215312143	215349652	ENSP00000236959.9|ENSP00000388675.1|ENSP00000406792.1|ENSP00000415935.1|ENSP00000394317.1|ENSP00000402393.1|ENSP00000401936.1	ENSG00000138363
PPP4C	ENSG00000149923	269.268	0.146086	0.0493572	2.95976	0.00307876	0.00815748	ENSG00000149923.13	chr16	30075978	30085377	+	protein_coding	HAVANA|ENSEMBL	30076378	30085059	ENSP00000455394.1|ENSP00000279387.7|ENSP00000458079.1|ENSP00000461609.1|ENSP00000457089.1|ENSP00000486140.1|ENSP00000457915.1|ENSP00000455995.1	ENSG00000149923	289.188	-0.191784	0.0722453	-2.65463	0.00793959	0.0344945	ENSG00000149923.13	chr16	30075978	30085377	+	PPP4C	protein_coding	HAVANA|ENSEMBL	30076378	30085059	ENSP00000455394.1|ENSP00000279387.7|ENSP00000458079.1|ENSP00000461609.1|ENSP00000457089.1|ENSP00000486140.1|ENSP00000457915.1|ENSP00000455995.1	ENSG00000149923
AC104076.3	ENSG00000236153	5.00682	0.910781	0.311425	2.92456	0.00344944	0.00905209	ENSG00000236153.1	chr2	180979427	180980090	-	antisense	HAVANA	NA	NA		ENSG00000236153	6.06561	-1.23324	0.385647	-3.19785	0.00138456	0.0078687	ENSG00000236153.1	chr2	180979427	180980090	-	AC104076.3	antisense	HAVANA	NA	NA		ENSG00000236153
RP11-91I8.3	ENSG00000266441	3.31073	0.8811	0.302536	2.91238	0.00358682	0.00937706	ENSG00000266441.1	chr18	6728821	6729862	-	antisense	HAVANA	NA	NA		ENSG00000266441	3.88857	-1.19072	0.369887	-3.21914	0.00128576	0.00737727	ENSG00000266441.1	chr18	6728821	6729862	-	RP11-91I8.3	antisense	HAVANA	NA	NA		ENSG00000266441
UBTFL9	ENSG00000254567	10.7964	0.790897	0.271665	2.9113	0.0035993	0.00940579	ENSG00000254567.2	chr11	49133653	49134800	-	processed_pseudogene	HAVANA	NA	NA		ENSG00000254567	12.8211	-1.21108	0.313211	-3.86664	0.000110344	0.000868527	ENSG00000254567.2	chr11	49133653	49134800	-	UBTFL9	processed_pseudogene	HAVANA	NA	NA		ENSG00000254567
NARS2	ENSG00000137513	135.661	0.166738	0.0574797	2.90081	0.00372196	0.0096966	ENSG00000137513.9	chr11	78435961	78574874	-	protein_coding	HAVANA	78436673	78574488	ENSP00000281038.5|ENSP00000435298.1|ENSP00000432635.1|ENSP00000436114.1|ENSP00000432240.1|ENSP00000433478.1	ENSG00000137513	146.279	-0.217968	0.0868827	-2.50877	0.0121153	0.0487885	ENSG00000137513.9	chr11	78435961	78574874	-	NARS2	protein_coding	HAVANA	78436673	78574488	ENSP00000281038.5|ENSP00000435298.1|ENSP00000432635.1|ENSP00000436114.1|ENSP00000432240.1|ENSP00000433478.1	ENSG00000137513
ACTL6A	ENSG00000136518	192.563	0.162189	0.0560257	2.89491	0.00379266	0.00987148	ENSG00000136518.16	chr3	179562880	179588408	+	protein_coding	HAVANA|ENSEMBL	179563093	179588007	ENSP00000397552.2|ENSP00000394014.2|ENSP00000376430.1|ENSP00000420153.1|ENSP00000420694.1	ENSG00000136518	207.455	-0.289674	0.0802704	-3.60873	0.000307705	0.00213939	ENSG00000136518.16	chr3	179562880	179588408	+	ACTL6A	protein_coding	HAVANA|ENSEMBL	179563093	179588007	ENSP00000397552.2|ENSP00000394014.2|ENSP00000376430.1|ENSP00000420153.1|ENSP00000420694.1	ENSG00000136518
C9orf85	ENSG00000155621	138.341	0.142438	0.0492766	2.89059	0.00384523	0.00999714	ENSG00000155621.14	chr9	71911510	71986054	+	protein_coding	HAVANA	71911735	71982870	ENSP00000433086.1|ENSP00000334289.2|ENSP00000366230.3|ENSP00000434838.1|ENSP00000431527.1|ENSP00000366226.1	ENSG00000155621	148.281	-0.182034	0.0695176	-2.61852	0.0088311	0.0377358	ENSG00000155621.14	chr9	71911510	71986054	+	C9orf85	protein_coding	HAVANA	71911735	71982870	ENSP00000433086.1|ENSP00000334289.2|ENSP00000366230.3|ENSP00000434838.1|ENSP00000431527.1|ENSP00000366226.1	ENSG00000155621
RP11-206M11.7	ENSG00000244468	8.66492	0.914634	0.319867	2.85942	0.00424417	0.0109616	ENSG00000244468.1	chr3	149284782	149333653	+	antisense	HAVANA	NA	NA		ENSG00000244468	8.23218	-0.939608	0.37263	-2.52156	0.0116837	0.0473603	ENSG00000244468.1	chr3	149284782	149333653	+	RP11-206M11.7	antisense	HAVANA	NA	NA		ENSG00000244468
CARTPT	ENSG00000164326	15.8712	0.749648	0.262699	2.85363	0.00432222	0.011147	ENSG00000164326.4	chr5	71719163	71721048	+	protein_coding	HAVANA	71719294	71720612	ENSP00000296777.4	ENSG00000164326	18.7777	-0.828605	0.330242	-2.50908	0.0121046	0.0487586	ENSG00000164326.4	chr5	71719163	71721048	+	CARTPT	protein_coding	HAVANA	71719294	71720612	ENSP00000296777.4	ENSG00000164326
TIMM17A	ENSG00000134375	155.202	0.177707	0.0624576	2.84524	0.00443782	0.0114158	ENSG00000134375.10	chr1	201955491	201970661	+	protein_coding	HAVANA	201955527	201969551	ENSP00000356256.4	ENSG00000134375	167.887	-0.251958	0.0938844	-2.6837	0.00728121	0.0321449	ENSG00000134375.10	chr1	201955491	201970661	+	TIMM17A	protein_coding	HAVANA	201955527	201969551	ENSP00000356256.4	ENSG00000134375
NPM1P39	ENSG00000225159	19.0816	0.293556	0.103332	2.8409	0.00449861	0.0115601	ENSG00000225159.1	chr1	27206930	27207796	+	processed_pseudogene	HAVANA	NA	NA		ENSG00000225159	21.1033	-0.304512	0.120479	-2.52752	0.011487	0.0467601	ENSG00000225159.1	chr1	27206930	27207796	+	NPM1P39	processed_pseudogene	HAVANA	NA	NA		ENSG00000225159
CA13	ENSG00000185015	85.5075	0.408416	0.144114	2.83397	0.00459741	0.0117894	ENSG00000185015.7	chr8	85220587	85284073	+	protein_coding	HAVANA	85245829	85281346	ENSP00000318912.3	ENSG00000185015	96.0353	-0.793149	0.21902	-3.62136	0.000293056	0.00205139	ENSG00000185015.7	chr8	85220587	85284073	+	CA13	protein_coding	HAVANA	85245829	85281346	ENSP00000318912.3	ENSG00000185015
PDCD6	ENSG00000249915	504.285	0.15537	0.0551093	2.81931	0.00481273	0.0122916	ENSG00000249915.7	chr5	271621	353856	+	protein_coding	HAVANA|ENSEMBL	271721	343903	ENSP00000264933.4|ENSP00000482332.1|ENSP00000485024.1|ENSP00000485941.1|ENSP00000422085.1|ENSP00000422691.1|ENSP00000423815.1|ENSP00000424201.1|ENSP00000426003.1|ENSP00000425370.1	ENSG00000249915	542.707	-0.234355	0.0781858	-2.99742	0.00272278	0.0139976	ENSG00000249915.7	chr5	271621	353856	+	PDCD6	protein_coding	HAVANA|ENSEMBL	271721	343903	ENSP00000264933.4|ENSP00000482332.1|ENSP00000485024.1|ENSP00000485941.1|ENSP00000422085.1|ENSP00000422691.1|ENSP00000423815.1|ENSP00000424201.1|ENSP00000426003.1|ENSP00000425370.1	ENSG00000249915
DICER1-AS1	ENSG00000235706	77.0435	0.23009	0.0819919	2.80625	0.00501216	0.0127621	ENSG00000235706.7	chr14	95157645	95179933	+	antisense	HAVANA	NA	NA		ENSG00000235706	83.8933	-0.310934	0.123777	-2.51205	0.0120033	0.0484168	ENSG00000235706.7	chr14	95157645	95179933	+	DICER1-AS1	antisense	HAVANA	NA	NA		ENSG00000235706
NBPF3	ENSG00000142794	171.685	0.175811	0.0627801	2.80043	0.00510342	0.0129765	ENSG00000142794.18	chr1	21440128	21485005	+	protein_coding	HAVANA|ENSEMBL	21445087	21483383	ENSP00000415711.2|ENSP00000316739.7|ENSP00000340336.5|ENSP00000478530.1|ENSP00000316782.5|ENSP00000391865.2|ENSP00000479028.1|ENSP00000484028.1	ENSG00000142794	185.123	-0.238078	0.0837914	-2.84132	0.00449278	0.0214812	ENSG00000142794.18	chr1	21440128	21485005	+	NBPF3	protein_coding	HAVANA|ENSEMBL	21445087	21483383	ENSP00000415711.2|ENSP00000316739.7|ENSP00000340336.5|ENSP00000478530.1|ENSP00000316782.5|ENSP00000391865.2|ENSP00000479028.1|ENSP00000484028.1	ENSG00000142794
EIF2B5	ENSG00000145191	509.27	0.129979	0.0464498	2.79826	0.00513781	0.0130557	ENSG00000145191.11	chr3	184135038	184684758	+	protein_coding	HAVANA	184135386	184684494	ENSP00000273783.3|ENSP00000414775.1|ENSP00000409142.1|ENSP00000408198.1	ENSG00000145191	545.005	-0.25498	0.0702538	-3.62941	0.000284067	0.00199636	ENSG00000145191.11	chr3	184135038	184684758	+	EIF2B5	protein_coding	HAVANA	184135386	184684494	ENSP00000273783.3|ENSP00000414775.1|ENSP00000409142.1|ENSP00000408198.1	ENSG00000145191
C21orf58	ENSG00000160298	89.52	0.207408	0.0741385	2.79757	0.00514886	0.0130831	ENSG00000160298.17	chr21	46300181	46323875	-	protein_coding	HAVANA	46300777	46322738	ENSP00000431312.1|ENSP00000380799.1|ENSP00000402356.1|ENSP00000380798.3|ENSP00000291691.7|ENSP00000380796.1|ENSP00000380797.1|ENSP00000390432.1	ENSG00000160298	97.1102	-0.421381	0.1014	-4.15562	3.24e-05	0.000289732	ENSG00000160298.17	chr21	46300181	46323875	-	C21orf58	protein_coding	HAVANA	46300777	46322738	ENSP00000431312.1|ENSP00000380799.1|ENSP00000402356.1|ENSP00000380798.3|ENSP00000291691.7|ENSP00000380796.1|ENSP00000380797.1|ENSP00000390432.1	ENSG00000160298
HIST3H2BB	ENSG00000196890	37.4854	0.375171	0.135054	2.77793	0.00547067	0.0138341	ENSG00000196890.4	chr1	228458107	228460470	+	protein_coding	HAVANA	228458130	228458507	ENSP00000479284.1	ENSG00000196890	41.9418	-0.733191	0.192227	-3.8142	0.000136623	0.00104959	ENSG00000196890.4	chr1	228458107	228460470	+	HIST3H2BB	protein_coding	HAVANA	228458130	228458507	ENSP00000479284.1	ENSG00000196890
EFNA3	ENSG00000143590	16.8394	0.491309	0.178121	2.75829	0.00581043	0.0146312	ENSG00000143590.13	chr1	155078872	155087538	+	protein_coding	HAVANA	155078942	155086540	ENSP00000357393.3	ENSG00000143590	19.0676	-0.659963	0.227721	-2.89812	0.00375401	0.0184081	ENSG00000143590.13	chr1	155078872	155087538	+	EFNA3	protein_coding	HAVANA	155078942	155086540	ENSP00000357393.3	ENSG00000143590
MKI67	ENSG00000148773	471.129	0.39205	0.142154	2.75792	0.00581712	0.0146466	ENSG00000148773.12	chr10	128096659	128126385	-	protein_coding	HAVANA|ENSEMBL	128099193	128125667	ENSP00000357642.3|ENSP00000357643.3|ENSP00000479215.1	ENSG00000148773	528.863	-0.896407	0.200495	-4.47096	7.79e-06	8e-05	ENSG00000148773.12	chr10	128096659	128126385	-	MKI67	protein_coding	HAVANA|ENSEMBL	128099193	128125667	ENSP00000357642.3|ENSP00000357643.3|ENSP00000479215.1	ENSG00000148773
MFN1	ENSG00000171109	724.328	0.209108	0.0760746	2.74872	0.00598285	0.0150306	ENSG00000171109.18	chr3	179347692	179394931	+	protein_coding	HAVANA	179348852	179392056	ENSP00000420617.1|ENSP00000349963.4|ENSP00000419134.2|ENSP00000263969.5|ENSP00000420148.1|ENSP00000419926.1	ENSG00000171109	786.721	-0.323079	0.110233	-2.93087	0.00338009	0.0168165	ENSG00000171109.18	chr3	179347692	179394931	+	MFN1	protein_coding	HAVANA	179348852	179392056	ENSP00000420617.1|ENSP00000349963.4|ENSP00000419134.2|ENSP00000263969.5|ENSP00000420148.1|ENSP00000419926.1	ENSG00000171109
LRGUK	ENSG00000155530	50.1901	0.337247	0.123594	2.72866	0.00635913	0.0158938	ENSG00000155530.2	chr7	134127299	134264591	+	protein_coding	HAVANA	134127368	134263972	ENSP00000285928.2	ENSG00000155530	55.6088	-0.423703	0.144049	-2.94138	0.00326749	0.0163388	ENSG00000155530.2	chr7	134127299	134264591	+	LRGUK	protein_coding	HAVANA	134127368	134263972	ENSP00000285928.2	ENSG00000155530
GNG10	ENSG00000242616	11.6589	0.376712	0.138124	2.72735	0.0063845	0.0159501	ENSG00000242616.3	chr9	111661335	111670246	+	protein_coding	HAVANA	111661635	111666937	ENSP00000363411.3	ENSG00000242616	13.0482	-0.56185	0.194041	-2.89552	0.00378533	0.0185452	ENSG00000242616.3	chr9	111661335	111670246	+	GNG10	protein_coding	HAVANA	111661635	111666937	ENSP00000363411.3	ENSG00000242616
RN7SL582P	ENSG00000241156	7.62387	0.496715	0.182163	2.72676	0.00639601	0.015977	ENSG00000241156.3	chr3	116582552	116582830	-	misc_RNA	ENSEMBL	NA	NA		ENSG00000241156	8.67539	-0.776675	0.233586	-3.32501	0.000884157	0.00534367	ENSG00000241156.3	chr3	116582552	116582830	-	RN7SL582P	misc_RNA	ENSEMBL	NA	NA		ENSG00000241156
BX255923.2	ENSG00000204790	4.33318	0.751339	0.276055	2.7217	0.00649466	0.0162034	ENSG00000204790.9	chr9	63974762	64004155	-	unprocessed_pseudogene	HAVANA	NA	NA		ENSG00000204790	5.14192	-0.952761	0.380817	-2.50189	0.0123534	0.0496074	ENSG00000204790.9	chr9	63974762	64004155	-	BX255923.2	unprocessed_pseudogene	HAVANA	NA	NA		ENSG00000204790
CTC-340A15.2	ENSG00000241956	61.6976	0.584406	0.214738	2.72148	0.00649904	0.0162124	ENSG00000241956.9	chr5	164296696	165171643	+	antisense	HAVANA	NA	NA		ENSG00000241956	71.1712	-0.673673	0.246521	-2.73272	0.00628143	0.0284224	ENSG00000241956.9	chr5	164296696	165171643	+	CTC-340A15.2	antisense	HAVANA	NA	NA		ENSG00000241956
CCDC58	ENSG00000160124	78.1108	0.182437	0.0673337	2.70945	0.00673946	0.0167499	ENSG00000160124.9	chr3	122359591	122383231	-	protein_coding	HAVANA	122359872	122383224	ENSP00000291458.5|ENSP00000420769.1|ENSP00000420248.1|ENSP00000418810.1	ENSG00000160124	84.4919	-0.300285	0.0986955	-3.04254	0.00234588	0.0123334	ENSG00000160124.9	chr3	122359591	122383231	-	CCDC58	protein_coding	HAVANA	122359872	122383224	ENSP00000291458.5|ENSP00000420769.1|ENSP00000420248.1|ENSP00000418810.1	ENSG00000160124
CDH15	ENSG00000129910	33.941	0.581961	0.215799	2.69677	0.00700154	0.0173526	ENSG00000129910.7	chr16	89171767	89195492	+	protein_coding	HAVANA	89171832	89195152	ENSP00000289746.2	ENSG00000129910	39.0822	-0.78449	0.301448	-2.60241	0.00925722	0.0391925	ENSG00000129910.7	chr16	89171767	89195492	+	CDH15	protein_coding	HAVANA	89171832	89195152	ENSP00000289746.2	ENSG00000129910
RNF123	ENSG00000164068	285.18	0.132875	0.0492952	2.6955	0.00702831	0.017418	ENSG00000164068.15	chr3	49689499	49721529	+	protein_coding	HAVANA|ENSEMBL	49691166	49721302	ENSP00000328287.6|ENSP00000392443.1|ENSP00000394369.1|ENSP00000408490.1|ENSP00000390856.1|ENSP00000487104.1|ENSP00000416156.1|ENSP00000413794.1	ENSG00000164068	305.301	-0.285307	0.0741804	-3.84612	0.000120003	0.000935704	ENSG00000164068.15	chr3	49689499	49721529	+	RNF123	protein_coding	HAVANA|ENSEMBL	49691166	49721302	ENSP00000328287.6|ENSP00000392443.1|ENSP00000394369.1|ENSP00000408490.1|ENSP00000390856.1|ENSP00000487104.1|ENSP00000416156.1|ENSP00000413794.1	ENSG00000164068
TTC21B	ENSG00000123607	569.989	0.250066	0.0949464	2.63376	0.00844451	0.0205675	ENSG00000123607.14	chr2	165857475	165953843	-	protein_coding	HAVANA	165874758	165953705	ENSP00000376460.2|ENSP00000243344.7	ENSG00000123607	624.23	-0.368673	0.13726	-2.68595	0.00723241	0.0319772	ENSG00000123607.14	chr2	165857475	165953843	-	TTC21B	protein_coding	HAVANA	165874758	165953705	ENSP00000376460.2|ENSP00000243344.7	ENSG00000123607
EDA	ENSG00000158813	116.001	0.328252	0.12516	2.62266	0.00872451	0.02119	ENSG00000158813.17	chrX	69616067	70039469	+	protein_coding	HAVANA|ENSEMBL	69616309	70035606	ENSP00000340611.4|ENSP00000434195.1|ENSP00000434861.1|ENSP00000363681.2|ENSP00000363680.4|ENSP00000432585.1|ENSP00000423037.1|ENSP00000481963.1	ENSG00000158813	128.56	-0.731811	0.184362	-3.96942	7.2e-05	0.000593341	ENSG00000158813.17	chrX	69616067	70039469	+	EDA	protein_coding	HAVANA|ENSEMBL	69616309	70035606	ENSP00000340611.4|ENSP00000434195.1|ENSP00000434861.1|ENSP00000363681.2|ENSP00000363680.4|ENSP00000432585.1|ENSP00000423037.1|ENSP00000481963.1	ENSG00000158813
FAM111B	ENSG00000189057	55.9115	0.383606	0.146985	2.60983	0.00905864	0.0219222	ENSG00000189057.10	chr11	59107185	59127410	+	protein_coding	HAVANA|ENSEMBL	59109626	59126299	ENSP00000393855.1|ENSP00000432875.1|ENSP00000432143.1|ENSP00000341565.3|ENSP00000483456.1	ENSG00000189057	62.6321	-0.619515	0.202831	-3.05434	0.0022556	0.0119424	ENSG00000189057.10	chr11	59107185	59127410	+	FAM111B	protein_coding	HAVANA|ENSEMBL	59109626	59126299	ENSP00000393855.1|ENSP00000432875.1|ENSP00000432143.1|ENSP00000341565.3|ENSP00000483456.1	ENSG00000189057
C11orf80	ENSG00000173715	232.721	0.233388	0.089916	2.59563	0.00944184	0.0227736	ENSG00000173715.15	chr11	66744451	66843328	+	protein_coding	HAVANA|ENSEMBL	66744743	66843231	ENSP00000437319.1|ENSP00000434960.1|ENSP00000432039.2|ENSP00000431578.1|ENSP00000444319.1|ENSP00000437143.2|ENSP00000434804.2|ENSP00000434648.2|ENSP00000354227.5|ENSP00000435512.1|ENSP00000433869.1|ENSP00000432775.1|ENSP00000433032.1	ENSG00000173715	253.885	-0.455937	0.129855	-3.51112	0.000446226	0.00296252	ENSG00000173715.15	chr11	66744451	66843328	+	C11orf80	protein_coding	HAVANA|ENSEMBL	66744743	66843231	ENSP00000437319.1|ENSP00000434960.1|ENSP00000432039.2|ENSP00000431578.1|ENSP00000444319.1|ENSP00000437143.2|ENSP00000434804.2|ENSP00000434648.2|ENSP00000354227.5|ENSP00000435512.1|ENSP00000433869.1|ENSP00000432775.1|ENSP00000433032.1	ENSG00000173715
AC090498.1	ENSG00000279483	656.851	0.294027	0.113789	2.58396	0.00976733	0.0235037	ENSG00000279483.1	chr7	137513832	137514238	+	protein_coding	ENSEMBL	137513859	137513933	ENSP00000485567.1	ENSG00000279483	724.771	-0.420274	0.153614	-2.73592	0.00622064	0.0282252	ENSG00000279483.1	chr7	137513832	137514238	+	AC090498.1	protein_coding	ENSEMBL	137513859	137513933	ENSP00000485567.1	ENSG00000279483
EMC9	ENSG00000100908	46.5194	0.204418	0.0793784	2.57523	0.0100173	0.024053	ENSG00000100908.13	chr14	24138959	24141588	-	protein_coding	HAVANA	24139013	24141304	ENSP00000454016.1|ENSP00000403210.2|ENSP00000216799.4|ENSP00000452797.1	ENSG00000100908	50.3392	-0.375454	0.103338	-3.63327	0.00027985	0.0019711	ENSG00000100908.13	chr14	24138959	24141588	-	EMC9	protein_coding	HAVANA	24139013	24141304	ENSP00000454016.1|ENSP00000403210.2|ENSP00000216799.4|ENSP00000452797.1	ENSG00000100908
ZNF696	ENSG00000185730	95.7495	0.150608	0.0587013	2.56567	0.0102978	0.0246623	ENSG00000185730.7	chr8	143289676	143298061	+	protein_coding	HAVANA	143290841	143296797	ENSP00000428163.1|ENSP00000427857.1|ENSP00000328515.3|ENSP00000429859.1|ENSP00000428856.1|ENSP00000430952.1	ENSG00000185730	102.857	-0.217679	0.0836683	-2.60169	0.0092766	0.0392556	ENSG00000185730.7	chr8	143289676	143298061	+	ZNF696	protein_coding	HAVANA	143290841	143296797	ENSP00000428163.1|ENSP00000427857.1|ENSP00000328515.3|ENSP00000429859.1|ENSP00000428856.1|ENSP00000430952.1	ENSG00000185730
RNA5SP228	ENSG00000252041	3.51052	0.838441	0.328043	2.55589	0.0105918	0.0253061	ENSG00000252041.1	chr7	24132705	24132837	+	rRNA	ENSEMBL	NA	NA		ENSG00000252041	4.16081	-1.45838	0.417541	-3.49277	0.000478038	0.00314589	ENSG00000252041.1	chr7	24132705	24132837	+	RNA5SP228	rRNA	ENSEMBL	NA	NA		ENSG00000252041
STAU2	ENSG00000040341	377.659	0.171196	0.0670182	2.55448	0.0106348	0.0254006	ENSG00000040341.17	chr8	73420369	73747708	-	protein_coding	HAVANA	73421375	73747440	ENSP00000428456.1|ENSP00000428756.1|ENSP00000428741.1|ENSP00000429173.1|ENSP00000430511.1|ENSP00000348026.5|ENSP00000430907.1|ENSP00000429973.1|ENSP00000428476.1|ENSP00000427977.1|ENSP00000431111.1|ENSP00000428664.1|ENSP00000429005.1|ENSP00000428284.1|ENSP00000428829.1|ENSP00000430611.1|ENSP00000428681.1|ENSP00000428737.1	ENSG00000040341	407.098	-0.3515	0.10674	-3.29307	0.000991008	0.00589612	ENSG00000040341.17	chr8	73420369	73747708	-	STAU2	protein_coding	HAVANA	73421375	73747440	ENSP00000428456.1|ENSP00000428756.1|ENSP00000428741.1|ENSP00000429173.1|ENSP00000430511.1|ENSP00000348026.5|ENSP00000430907.1|ENSP00000429973.1|ENSP00000428476.1|ENSP00000427977.1|ENSP00000431111.1|ENSP00000428664.1|ENSP00000429005.1|ENSP00000428284.1|ENSP00000428829.1|ENSP00000430611.1|ENSP00000428681.1|ENSP00000428737.1	ENSG00000040341
RP11-544M22.3	ENSG00000232879	8.38829	0.328875	0.129039	2.54864	0.0108144	0.0258047	ENSG00000232879.2	chr1	161034834	161035006	+	processed_pseudogene	HAVANA	NA	NA		ENSG00000232879	9.37843	-0.438571	0.161963	-2.70785	0.00677201	0.0302894	ENSG00000232879.2	chr1	161034834	161035006	+	RP11-544M22.3	processed_pseudogene	HAVANA	NA	NA		ENSG00000232879
TMEM69	ENSG00000159596	124.394	0.115836	0.0456028	2.5401	0.0110821	0.0263682	ENSG00000159596.6	chr1	45687214	45694443	+	protein_coding	HAVANA	45691069	45693902	ENSP00000361095.4	ENSG00000159596	133.067	-0.16433	0.0654978	-2.50895	0.0121092	0.0487727	ENSG00000159596.6	chr1	45687214	45694443	+	TMEM69	protein_coding	HAVANA	45691069	45693902	ENSP00000361095.4	ENSG00000159596
FAM117B	ENSG00000138439	528.726	0.301428	0.118711	2.53918	0.0111111	0.02643	ENSG00000138439.11	chr2	202635188	202769757	+	protein_coding	HAVANA	202635188	202765761	ENSP00000376071.2	ENSG00000138439	584.037	-0.660143	0.177495	-3.71922	0.000199842	0.00146877	ENSG00000138439.11	chr2	202635188	202769757	+	FAM117B	protein_coding	HAVANA	202635188	202765761	ENSP00000376071.2	ENSG00000138439
KIF9	ENSG00000088727	85.4248	0.267482	0.105487	2.53567	0.0112231	0.0266578	ENSG00000088727.12	chr3	47228026	47283451	-	protein_coding	HAVANA|ENSEMBL	47228655	47280988	ENSP00000333942.2|ENSP00000265529.3|ENSP00000414987.2|ENSP00000391100.2|ENSP00000405774.1|ENSP00000387959.1|ENSP00000406815.1|ENSP00000391099.1|ENSP00000406603.1	ENSG00000088727	93.5858	-0.389812	0.125285	-3.1114	0.00186203	0.0101449	ENSG00000088727.12	chr3	47228026	47283451	-	KIF9	protein_coding	HAVANA|ENSEMBL	47228655	47280988	ENSP00000333942.2|ENSP00000265529.3|ENSP00000414987.2|ENSP00000391100.2|ENSP00000405774.1|ENSP00000387959.1|ENSP00000406815.1|ENSP00000391099.1|ENSP00000406603.1	ENSG00000088727
RPS19BP1	ENSG00000187051	254.35	0.146444	0.057843	2.53175	0.0113494	0.0269187	ENSG00000187051.8	chr22	39529093	39532855	-	protein_coding	HAVANA	39529495	39532738	ENSP00000333948.3|ENSP00000399304.1	ENSG00000187051	272.976	-0.315289	0.0827867	-3.80845	0.000139843	0.00107136	ENSG00000187051.8	chr22	39529093	39532855	-	RPS19BP1	protein_coding	HAVANA	39529495	39532738	ENSP00000333948.3|ENSP00000399304.1	ENSG00000187051
RP4-800G7.2	ENSG00000244560	71.758	0.23536	0.0929958	2.53087	0.0113779	0.0269806	ENSG00000244560.6	chr7	149285281	149297312	+	transcribed_unprocessed_pseudogene	HAVANA	NA	NA		ENSG00000244560	78.135	-0.374539	0.144743	-2.58761	0.00966445	0.0405792	ENSG00000244560.6	chr7	149285281	149297312	+	RP4-800G7.2	transcribed_unprocessed_pseudogene	HAVANA	NA	NA		ENSG00000244560
TMEM258	ENSG00000134825	96.8349	0.15792	0.0625252	2.5257	0.0115467	0.027337	ENSG00000134825.13	chr11	61768501	61792802	-	protein_coding	HAVANA	61789798	61792558	ENSP00000443216.1|ENSP00000441836.1|ENSP00000445404.1|ENSP00000257262.8|ENSP00000437809.1|ENSP00000443836.1	ENSG00000134825	104.174	-0.279471	0.0900971	-3.10189	0.00192289	0.0104302	ENSG00000134825.13	chr11	61768501	61792802	-	TMEM258	protein_coding	HAVANA	61789798	61792558	ENSP00000443216.1|ENSP00000441836.1|ENSP00000445404.1|ENSP00000257262.8|ENSP00000437809.1|ENSP00000443836.1	ENSG00000134825
AC005160.3	ENSG00000227658	8.71415	0.449322	0.178034	2.5238	0.0116093	0.0274704	ENSG00000227658.1	chr7	40775558	40785217	+	sense_intronic	HAVANA	NA	NA		ENSG00000227658	9.8231	-0.722235	0.224214	-3.22119	0.0012766	0.00733303	ENSG00000227658.1	chr7	40775558	40785217	+	AC005160.3	sense_intronic	HAVANA	NA	NA		ENSG00000227658
PIGW	ENSG00000277161	54.2462	0.220418	0.0874539	2.52039	0.0117223	0.0277216	ENSG00000277161.1	chr17	36535020	36539310	+	protein_coding	HAVANA	36537102	36538613	ENSP00000480475.1|ENSP00000482202.1|ENSP00000480021.1	ENSG00000277161	59.121	-0.458467	0.122495	-3.74273	0.000182032	0.00135246	ENSG00000277161.1	chr17	36535020	36539310	+	PIGW	protein_coding	HAVANA	36537102	36538613	ENSP00000480475.1|ENSP00000482202.1|ENSP00000480021.1	ENSG00000277161
SREBF2	ENSG00000198911	989.22	0.177085	0.0702672	2.52017	0.0117298	0.0277348	ENSG00000198911.11	chr22	41833079	41907308	+	protein_coding	HAVANA|ENSEMBL	41833271	41905657	ENSP00000484441.1|ENSP00000354476.4|ENSP00000395728.1|ENSP00000412287.1	ENSG00000198911	1068.23	-0.266164	0.106514	-2.49885	0.0124596	0.0498979	ENSG00000198911.11	chr22	41833079	41907308	+	SREBF2	protein_coding	HAVANA|ENSEMBL	41833271	41905657	ENSP00000484441.1|ENSP00000354476.4|ENSP00000395728.1|ENSP00000412287.1	ENSG00000198911
C17orf75	ENSG00000108666	134.375	0.13289	0.0527999	2.51687	0.0118404	0.027968	ENSG00000108666.9	chr17	32324565	32350023	-	protein_coding	HAVANA|ENSEMBL	32324728	32342139	ENSP00000462873.1|ENSP00000225805.4|ENSP00000464275.1|ENSP00000464416.1|ENSP00000464759.1|ENSP00000462127.1|ENSP00000464845.1|ENSP00000463184.1|ENSP00000468451.1	ENSG00000108666	143.83	-0.236084	0.0764201	-3.0893	0.0020063	0.010798	ENSG00000108666.9	chr17	32324565	32350023	-	C17orf75	protein_coding	HAVANA|ENSEMBL	32324728	32342139	ENSP00000462873.1|ENSP00000225805.4|ENSP00000464275.1|ENSP00000464416.1|ENSP00000464759.1|ENSP00000462127.1|ENSP00000464845.1|ENSP00000463184.1|ENSP00000468451.1	ENSG00000108666
CCDC51	ENSG00000164051	62.8662	0.206328	0.082077	2.51383	0.0119426	0.0281929	ENSG00000164051.13	chr3	48432164	48440456	-	protein_coding	HAVANA	48432411	48435128	ENSP00000412300.1|ENSP00000379047.2|ENSP00000401194.2|ENSP00000392898.1|ENSP00000409494.1|ENSP00000408197.1	ENSG00000164051	67.9955	-0.441076	0.10961	-4.02405	5.72e-05	0.000483058	ENSG00000164051.13	chr3	48432164	48440456	-	CCDC51	protein_coding	HAVANA	48432411	48435128	ENSP00000412300.1|ENSP00000379047.2|ENSP00000401194.2|ENSP00000392898.1|ENSP00000409494.1|ENSP00000408197.1	ENSG00000164051
ANLN	ENSG00000011426	72.0157	0.370794	0.147518	2.51356	0.0119521	0.0282122	ENSG00000011426.10	chr7	36389806	36453791	+	protein_coding	HAVANA	36390027	36452597	ENSP00000265748.2|ENSP00000379380.2|ENSP00000404979.1|ENSP00000406584.1|ENSP00000398712.1|ENSP00000397465.1|ENSP00000413441.1|ENSP00000413522.1|ENSP00000400777.1|ENSP00000399553.1	ENSG00000011426	80.4032	-0.724974	0.197228	-3.67581	0.000237099	0.0017059	ENSG00000011426.10	chr7	36389806	36453791	+	ANLN	protein_coding	HAVANA	36390027	36452597	ENSP00000265748.2|ENSP00000379380.2|ENSP00000404979.1|ENSP00000406584.1|ENSP00000398712.1|ENSP00000397465.1|ENSP00000413441.1|ENSP00000413522.1|ENSP00000400777.1|ENSP00000399553.1	ENSG00000011426
PPP3CB-AS1	ENSG00000221817	200.982	0.172816	0.0688518	2.50997	0.0120741	0.0284699	ENSG00000221817.9	chr10	73495525	73520070	+	processed_transcript	HAVANA	NA	NA		ENSG00000221817	216.52	-0.34771	0.104237	-3.33576	0.000850659	0.00517015	ENSG00000221817.9	chr10	73495525	73520070	+	PPP3CB-AS1	processed_transcript	HAVANA	NA	NA		ENSG00000221817
CENPF	ENSG00000117724	289.224	0.375628	0.15056	2.49487	0.0126002	0.0296236	ENSG00000117724.12	chr1	214603195	214664588	+	protein_coding	HAVANA|ENSEMBL	214613755	214663791	ENSP00000355922.3|ENSP00000478221.1	ENSG00000117724	323.711	-0.818625	0.210107	-3.89622	9.77e-05	0.000781099	ENSG00000117724.12	chr1	214603195	214664588	+	CENPF	protein_coding	HAVANA|ENSEMBL	214613755	214663791	ENSP00000355922.3|ENSP00000478221.1	ENSG00000117724
AP001258.5	ENSG00000255381	5.54347	0.534656	0.214691	2.49036	0.0127615	0.0299726	ENSG00000255381.1	chr11	59142121	59142610	-	processed_pseudogene	HAVANA	NA	NA		ENSG00000255381	6.36149	-0.876299	0.296951	-2.95098	0.00316763	0.015915	ENSG00000255381.1	chr11	59142121	59142610	-	AP001258.5	processed_pseudogene	HAVANA	NA	NA		ENSG00000255381
LSM5	ENSG00000106355	174.471	0.16266	0.0658705	2.4694	0.013534	0.0316393	ENSG00000106355.9	chr7	32485332	32495283	-	protein_coding	HAVANA	32487264	32490365	ENSP00000410758.2|ENSP00000386363.3|ENSP00000386814.1|ENSP00000386707.1|ENSP00000386275.1|ENSP00000223084.3|ENSP00000387109.1|ENSP00000387126.3	ENSG00000106355	187.942	-0.277227	0.102744	-2.69822	0.00697104	0.0310167	ENSG00000106355.9	chr7	32485332	32495283	-	LSM5	protein_coding	HAVANA	32487264	32490365	ENSP00000410758.2|ENSP00000386363.3|ENSP00000386814.1|ENSP00000386707.1|ENSP00000386275.1|ENSP00000223084.3|ENSP00000387109.1|ENSP00000387126.3	ENSG00000106355
LHFPL3-AS2	ENSG00000225329	23.9914	0.685093	0.280855	2.43931	0.0147154	0.0341094	ENSG00000225329.3	chr7	104894628	104926645	-	processed_transcript	HAVANA	NA	NA		ENSG00000225329	28.065	-1.49242	0.393647	-3.79127	0.000149877	0.00113857	ENSG00000225329.3	chr7	104894628	104926645	-	LHFPL3-AS2	processed_transcript	HAVANA	NA	NA		ENSG00000225329
RP11-465B22.3	ENSG00000217801	35.0602	0.368613	0.151134	2.43899	0.0147285	0.0341364	ENSG00000217801.9	chr1	1059734	1069355	+	transcribed_unprocessed_pseudogene	HAVANA	NA	NA		ENSG00000217801	39.0188	-0.517184	0.195054	-2.65149	0.00801365	0.0347583	ENSG00000217801.9	chr1	1059734	1069355	+	RP11-465B22.3	transcribed_unprocessed_pseudogene	HAVANA	NA	NA		ENSG00000217801
FBXL6	ENSG00000182325	34.9501	0.209532	0.0860066	2.43623	0.0148411	0.0343738	ENSG00000182325.10	chr8	144355431	144359376	-	protein_coding	HAVANA	144355534	144358447	ENSP00000403873.2|ENSP00000330098.5	ENSG00000182325	37.969	-0.347469	0.119061	-2.91841	0.00351819	0.0174194	ENSG00000182325.10	chr8	144355431	144359376	-	FBXL6	protein_coding	HAVANA	144355534	144358447	ENSP00000403873.2|ENSP00000330098.5	ENSG00000182325
LINC01004	ENSG00000228393	98.2909	0.225765	0.0929406	2.42913	0.0151352	0.0349873	ENSG00000228393.3	chr7	104950315	105013044	-	antisense	HAVANA	NA	NA		ENSG00000228393	106.966	-0.481547	0.144744	-3.32688	0.000878255	0.0053109	ENSG00000228393.3	chr7	104950315	105013044	-	LINC01004	antisense	HAVANA	NA	NA		ENSG00000228393
IPO7P2	ENSG00000225674	20.5697	0.398785	0.16437	2.42614	0.0152604	0.03524	ENSG00000225674.1	chr13	24122065	24123814	-	processed_pseudogene	HAVANA	NA	NA		ENSG00000225674	23.0525	-0.768324	0.191598	-4.01008	6.07e-05	0.00050915	ENSG00000225674.1	chr13	24122065	24123814	-	IPO7P2	processed_pseudogene	HAVANA	NA	NA		ENSG00000225674
U47924.29	ENSG00000271969	7.47601	0.537797	0.223254	2.4089	0.0160007	0.0367693	ENSG00000271969.1	chr12	6964949	6965382	+	antisense	HAVANA	NA	NA		ENSG00000271969	8.51553	-0.93317	0.247895	-3.76438	0.00016696	0.00125373	ENSG00000271969.1	chr12	6964949	6965382	+	U47924.29	antisense	HAVANA	NA	NA		ENSG00000271969
HINT2	ENSG00000137133	54.0425	0.177406	0.07365	2.40877	0.0160062	0.036775	ENSG00000137133.10	chr9	35812960	35815354	-	protein_coding	HAVANA	35813057	35814979	ENSP00000259667.5	ENSG00000137133	58.2316	-0.271429	0.100761	-2.69379	0.00706453	0.0313572	ENSG00000137133.10	chr9	35812960	35815354	-	HINT2	protein_coding	HAVANA	35813057	35814979	ENSP00000259667.5	ENSG00000137133
CAMK2N2	ENSG00000163888	13.7588	0.444612	0.184675	2.40754	0.0160603	0.036889	ENSG00000163888.3	chr3	184259213	184261463	-	protein_coding	HAVANA	184260160	184261285	ENSP00000296238.3	ENSG00000163888	15.5411	-0.845853	0.230759	-3.66553	0.000246823	0.00176714	ENSG00000163888.3	chr3	184259213	184261463	-	CAMK2N2	protein_coding	HAVANA	184260160	184261285	ENSP00000296238.3	ENSG00000163888
COQ5	ENSG00000110871	141.377	0.121799	0.0508039	2.39743	0.0165107	0.0378097	ENSG00000110871.14	chr12	120503274	120534434	-	protein_coding	HAVANA	120503787	120529141	ENSP00000288532.6|ENSP00000401798.2|ENSP00000449863.1|ENSP00000449874.1|ENSP00000450001.1|ENSP00000449933.1	ENSG00000110871	150.82	-0.252959	0.0745797	-3.3918	0.000694357	0.00433865	ENSG00000110871.14	chr12	120503274	120534434	-	COQ5	protein_coding	HAVANA	120503787	120529141	ENSP00000288532.6|ENSP00000401798.2|ENSP00000449863.1|ENSP00000449874.1|ENSP00000450001.1|ENSP00000449933.1	ENSG00000110871
POLR1C	ENSG00000171453	93.1037	0.127802	0.0534681	2.39025	0.0168369	0.0384992	ENSG00000171453.17	chr6	43509702	43529585	+	protein_coding	HAVANA	43517110	43529352	ENSP00000395401.2|ENSP00000361465.3|ENSP00000361419.2|ENSP00000307212.3|ENSP00000409536.1	ENSG00000171453	99.5809	-0.24978	0.0751597	-3.32333	0.000889512	0.0053731	ENSG00000171453.17	chr6	43509702	43529585	+	POLR1C	protein_coding	HAVANA	43517110	43529352	ENSP00000395401.2|ENSP00000361465.3|ENSP00000361419.2|ENSP00000307212.3|ENSP00000409536.1	ENSG00000171453
RP13-923O23.7	ENSG00000280193	38.7035	0.273922	0.1157	2.36753	0.0179074	0.040697	ENSG00000280193.1	chr8	81696368	81698694	+	TEC	HAVANA	NA	NA		ENSG00000280193	42.4202	-0.644318	0.157757	-4.08424	4.42e-05	0.000382378	ENSG00000280193.1	chr8	81696368	81698694	+	RP13-923O23.7	TEC	HAVANA	NA	NA		ENSG00000280193
SLC25A26	ENSG00000144741	198.671	0.137506	0.0581566	2.36441	0.0180589	0.0410076	ENSG00000144741.17	chr3	66133610	66388116	+	protein_coding	HAVANA	66221095	66377804	ENSP00000346955.6|ENSP00000336801.5|ENSP00000432574.2|ENSP00000415304.2|ENSP00000437217.1	ENSG00000144741	212.863	-0.314907	0.0891327	-3.53301	0.000410855	0.00276121	ENSG00000144741.17	chr3	66133610	66388116	+	SLC25A26	protein_coding	HAVANA	66221095	66377804	ENSP00000346955.6|ENSP00000336801.5|ENSP00000432574.2|ENSP00000415304.2|ENSP00000437217.1	ENSG00000144741
AC004485.3	ENSG00000228944	10.7008	0.70804	0.301824	2.34587	0.0189825	0.0428347	ENSG00000228944.1	chr7	24196662	24255719	-	antisense	HAVANA	NA	NA		ENSG00000228944	12.5374	-1.51638	0.378515	-4.00613	6.17e-05	0.000516837	ENSG00000228944.1	chr7	24196662	24255719	-	AC004485.3	antisense	HAVANA	NA	NA		ENSG00000228944
NDUFB2	ENSG00000090266	196.984	0.141655	0.0608242	2.32893	0.0198628	0.0445893	ENSG00000090266.12	chr7	140690777	140722790	+	protein_coding	HAVANA	140696745	140721741	ENSP00000419392.1|ENSP00000419087.1|ENSP00000247866.4|ENSP00000420062.1|ENSP00000419357.1|ENSP00000418347.1|ENSP00000419479.1|ENSP00000418953.1|ENSP00000418573.1|ENSP00000420377.1|ENSP00000419983.1|ENSP00000418981.1	ENSG00000090266	211.096	-0.310804	0.0927667	-3.35038	0.000807011	0.00494421	ENSG00000090266.12	chr7	140690777	140722790	+	NDUFB2	protein_coding	HAVANA	140696745	140721741	ENSP00000419392.1|ENSP00000419087.1|ENSP00000247866.4|ENSP00000420062.1|ENSP00000419357.1|ENSP00000418347.1|ENSP00000419479.1|ENSP00000418953.1|ENSP00000418573.1|ENSP00000420377.1|ENSP00000419983.1|ENSP00000418981.1	ENSG00000090266
KIF4A	ENSG00000090889	46.7516	0.405854	0.174594	2.32456	0.0200957	0.0450664	ENSG00000090889.11	chrX	70290090	70420832	+	protein_coding	HAVANA	70290459	70420262	ENSP00000363524.3	ENSG00000090889	52.5369	-0.725204	0.238734	-3.03771	0.00238382	0.0125047	ENSG00000090889.11	chrX	70290090	70420832	+	KIF4A	protein_coding	HAVANA	70290459	70420262	ENSP00000363524.3	ENSG00000090889
TMEM5	ENSG00000118600	143.83	0.168775	0.0727616	2.31956	0.0203649	0.0456286	ENSG00000118600.11	chr12	63779803	63809558	+	protein_coding	HAVANA	63779961	63809089	ENSP00000261234.6|ENSP00000440845.1|ENSP00000440280.1	ENSG00000118600	154.924	-0.349208	0.10226	-3.41489	0.000638073	0.00403709	ENSG00000118600.11	chr12	63779803	63809558	+	TMEM5	protein_coding	HAVANA	63779961	63809089	ENSP00000261234.6|ENSP00000440845.1|ENSP00000440280.1	ENSG00000118600
PRELID1	ENSG00000169230	98.9873	0.155239	0.0675842	2.29698	0.02162	0.0481147	ENSG00000169230.9	chr5	177303774	177306959	+	protein_coding	HAVANA	177303986	177306614	ENSP00000302114.4|ENSP00000423873.1|ENSP00000421657.1|ENSP00000427097.1|ENSP00000426351.1	ENSG00000169230	106.533	-0.254199	0.10086	-2.52031	0.0117251	0.0474976	ENSG00000169230.9	chr5	177303774	177306959	+	PRELID1	protein_coding	HAVANA	177303986	177306614	ENSP00000302114.4|ENSP00000423873.1|ENSP00000421657.1|ENSP00000427097.1|ENSP00000426351.1	ENSG00000169230
SSU72	ENSG00000160075	747.702	0.113094	0.0493932	2.28967	0.0220406	0.0489523	ENSG00000160075.11	chr1	1541673	1574869	-	protein_coding	HAVANA	1542069	1574557	ENSP00000291386.3|ENSP00000351955.3	ENSG00000160075	798.104	-0.167654	0.06709	-2.49894	0.0124566	0.0498905	ENSG00000160075.11	chr1	1541673	1574869	-	SSU72	protein_coding	HAVANA	1542069	1574557	ENSP00000291386.3|ENSP00000351955.3	ENSG00000160075
PLEKHH2	ENSG00000152527	501.502	-0.951854	0.0907074	-10.4937	9.24e-26	2.33e-24	ENSG00000152527.13	chr2	43637273	43767987	+	protein_coding	HAVANA	43644674	43765595	ENSP00000282406.4|ENSP00000427746.1|ENSP00000430377.1	ENSG00000152527	409.821	0.400741	0.139698	2.86863	0.00412257	0.0199633	ENSG00000152527.13	chr2	43637273	43767987	+	PLEKHH2	protein_coding	HAVANA	43644674	43765595	ENSP00000282406.4|ENSP00000427746.1|ENSP00000430377.1	ENSG00000152527
SDPR	ENSG00000168497	407.191	-1.24641	0.131033	-9.51218	1.87e-21	3.16e-20	ENSG00000168497.4	chr2	191834302	191847255	-	protein_coding	HAVANA	191835926	191846925	ENSP00000305675.4	ENSG00000168497	302.101	0.557039	0.186611	2.98503	0.00283549	0.0144862	ENSG00000168497.4	chr2	191834302	191847255	-	SDPR	protein_coding	HAVANA	191835926	191846925	ENSP00000305675.4	ENSG00000168497
STARD9	ENSG00000159433	924.529	-0.861991	0.0985528	-8.74648	2.2e-18	2.83e-17	ENSG00000159433.11	chr15	42575659	42720981	+	protein_coding	HAVANA	42575716	42719571	ENSP00000290607.7|ENSP00000454594.1|ENSP00000454648.1	ENSG00000159433	776.378	0.502268	0.144155	3.48422	0.00049357	0.00323608	ENSG00000159433.11	chr15	42575659	42720981	+	STARD9	protein_coding	HAVANA	42575716	42719571	ENSP00000290607.7|ENSP00000454594.1|ENSP00000454648.1	ENSG00000159433
CNRIP1	ENSG00000119865	117.61	-0.683716	0.085213	-8.02361	1.03e-15	1.04e-14	ENSG00000119865.8	chr2	68284171	68320051	-	protein_coding	HAVANA	68284431	68319400	ENSP00000386883.3|ENSP00000263655.3|ENSP00000386544.1	ENSG00000119865	104.115	0.475194	0.131367	3.61731	0.000297678	0.00207947	ENSG00000119865.8	chr2	68284171	68320051	-	CNRIP1	protein_coding	HAVANA	68284431	68319400	ENSP00000386883.3|ENSP00000263655.3|ENSP00000386544.1	ENSG00000119865
RBMS1	ENSG00000153250	833.292	-0.629707	0.0800837	-7.86311	3.75e-15	3.62e-14	ENSG00000153250.17	chr2	160272151	160493794	-	protein_coding	HAVANA|ENSEMBL	160275640	160493363	ENSP00000294904.6|ENSP00000376508.4|ENSP00000386347.1|ENSP00000386571.2|ENSP00000387280.1|ENSP00000389016.1	ENSG00000153250	748.687	0.332872	0.121444	2.74096	0.00612595	0.0278726	ENSG00000153250.17	chr2	160272151	160493794	-	RBMS1	protein_coding	HAVANA|ENSEMBL	160275640	160493363	ENSP00000294904.6|ENSP00000376508.4|ENSP00000386347.1|ENSP00000386571.2|ENSP00000387280.1|ENSP00000389016.1	ENSG00000153250
DSE	ENSG00000111817	445.16	-0.564224	0.0732669	-7.70095	1.35e-14	1.24e-13	ENSG00000111817.16	chr6	116254173	116444860	+	protein_coding	HAVANA|ENSEMBL	116399251	116437342	ENSP00000397597.2|ENSP00000404049.2|ENSP00000332151.2|ENSP00000352567.2	ENSG00000111817	406.91	0.294579	0.115184	2.55746	0.0105441	0.0435785	ENSG00000111817.16	chr6	116254173	116444860	+	DSE	protein_coding	HAVANA|ENSEMBL	116399251	116437342	ENSP00000397597.2|ENSP00000404049.2|ENSP00000332151.2|ENSP00000352567.2	ENSG00000111817
RAPGEF3	ENSG00000079337	540.103	-0.826815	0.109726	-7.53527	4.87e-14	4.25e-13	ENSG00000079337.15	chr12	47734367	47771040	-	protein_coding	HAVANA|ENSEMBL	47737570	47758556	ENSP00000395708.2|ENSP00000384521.2|ENSP00000449905.1|ENSP00000448619.1|ENSP00000373864.3|ENSP00000448480.1|ENSP00000447691.1|ENSP00000378764.3|ENSP00000449818.1|ENSP00000446731.1|ENSP00000448804.1	ENSG00000079337	457.83	0.374921	0.143198	2.61819	0.0088397	0.0377605	ENSG00000079337.15	chr12	47734367	47771040	-	RAPGEF3	protein_coding	HAVANA|ENSEMBL	47737570	47758556	ENSP00000395708.2|ENSP00000384521.2|ENSP00000449905.1|ENSP00000448619.1|ENSP00000373864.3|ENSP00000448480.1|ENSP00000447691.1|ENSP00000378764.3|ENSP00000449818.1|ENSP00000446731.1|ENSP00000448804.1	ENSG00000079337
CNTNAP1	ENSG00000108797	216.892	-0.511534	0.0688972	-7.42459	1.13e-13	9.54e-13	ENSG00000108797.11	chr17	42682613	42699814	+	protein_coding	HAVANA	42682830	42698907	ENSP00000264638.3|ENSP00000466571.1	ENSG00000108797	200.742	0.271954	0.107473	2.53044	0.0113921	0.0464717	ENSG00000108797.11	chr17	42682613	42699814	+	CNTNAP1	protein_coding	HAVANA	42682830	42698907	ENSP00000264638.3|ENSP00000466571.1	ENSG00000108797
PLSCR4	ENSG00000114698	268.316	-0.751989	0.101632	-7.39914	1.37e-13	1.15e-12	ENSG00000114698.14	chr3	146192339	146251179	-	protein_coding	HAVANA|ENSEMBL	146194414	146222071	ENSP00000347038.2|ENSP00000372561.2|ENSP00000415605.2|ENSP00000399315.2|ENSP00000419040.1|ENSP00000417896.1|ENSP00000420385.1|ENSP00000418173.1|ENSP00000418419.1|ENSP00000417248.1	ENSG00000114698	232.778	0.588318	0.150896	3.89884	9.67e-05	0.000773662	ENSG00000114698.14	chr3	146192339	146251179	-	PLSCR4	protein_coding	HAVANA|ENSEMBL	146194414	146222071	ENSP00000347038.2|ENSP00000372561.2|ENSP00000415605.2|ENSP00000399315.2|ENSP00000419040.1|ENSP00000417896.1|ENSP00000420385.1|ENSP00000418173.1|ENSP00000418419.1|ENSP00000417248.1	ENSG00000114698
ZNF711	ENSG00000147180	90.0132	-0.729605	0.0996243	-7.32357	2.41e-13	1.97e-12	ENSG00000147180.16	chrX	85244032	85273362	+	protein_coding	HAVANA	85247573	85271825	ENSP00000362260.3|ENSP00000276123.3|ENSP00000353922.4	ENSG00000147180	78.5716	0.43291	0.159877	2.70777	0.00677374	0.030291	ENSG00000147180.16	chrX	85244032	85273362	+	ZNF711	protein_coding	HAVANA	85247573	85271825	ENSP00000362260.3|ENSP00000276123.3|ENSP00000353922.4	ENSG00000147180
KLHDC1	ENSG00000197776	116.48	-0.414914	0.0592756	-6.99974	2.56e-12	1.9e-11	ENSG00000197776.7	chr14	49693105	49753152	+	protein_coding	HAVANA	49693195	49751769	ENSP00000450595.1|ENSP00000451819.1|ENSP00000352282.2|ENSP00000452543.2|ENSP00000451407.1	ENSG00000197776	110.623	0.265447	0.0841963	3.15271	0.00161761	0.00899353	ENSG00000197776.7	chr14	49693105	49753152	+	KLHDC1	protein_coding	HAVANA	49693195	49751769	ENSP00000450595.1|ENSP00000451819.1|ENSP00000352282.2|ENSP00000452543.2|ENSP00000451407.1	ENSG00000197776
GPR17	ENSG00000144230	163.566	-0.866975	0.125009	-6.9353	4.05e-12	2.96e-11	ENSG00000144230.16	chr2	127645864	127652639	+	protein_coding	HAVANA|ENSEMBL	127650012	127651752	ENSP00000442982.1|ENSP00000272644.3|ENSP00000387970.1|ENSP00000376741.3	ENSG00000144230	137.206	0.693619	0.187195	3.70533	0.000211112	0.00154286	ENSG00000144230.16	chr2	127645864	127652639	+	GPR17	protein_coding	HAVANA|ENSEMBL	127650012	127651752	ENSP00000442982.1|ENSP00000272644.3|ENSP00000387970.1|ENSP00000376741.3	ENSG00000144230
ACACB	ENSG00000076555	1055.32	-0.787375	0.113996	-6.90704	4.95e-12	3.58e-11	ENSG00000076555.15	chr12	109116595	109268226	+	protein_coding	HAVANA|ENSEMBL	109139406	109266359	ENSP00000341044.7|ENSP00000443494.1|ENSP00000367085.6|ENSP00000367079.3|ENSP00000474680.1|ENSP00000443281.1|ENSP00000478488.1	ENSG00000076555	906.123	0.686448	0.151403	4.53392	5.79e-06	6.09e-05	ENSG00000076555.15	chr12	109116595	109268226	+	ACACB	protein_coding	HAVANA|ENSEMBL	109139406	109266359	ENSP00000341044.7|ENSP00000443494.1|ENSP00000367085.6|ENSP00000367079.3|ENSP00000474680.1|ENSP00000443281.1|ENSP00000478488.1	ENSG00000076555
RP11-40C11.2	ENSG00000231132	25.6688	-0.873633	0.130203	-6.70978	1.95e-11	1.34e-10	ENSG00000231132.1	chr10	51244894	51245806	-	antisense	HAVANA	NA	NA		ENSG00000231132	21.217	0.554198	0.191118	2.89977	0.00373434	0.0183359	ENSG00000231132.1	chr10	51244894	51245806	-	RP11-40C11.2	antisense	HAVANA	NA	NA		ENSG00000231132
SNCG	ENSG00000173267	104.542	-1.068	0.161216	-6.62464	3.48e-11	2.33e-10	ENSG00000173267.13	chr10	86958618	86963260	+	protein_coding	HAVANA	86958698	86962982	ENSP00000344658.4|ENSP00000361087.3	ENSG00000173267	82.2681	0.593542	0.235223	2.52331	0.0116254	0.047191	ENSG00000173267.13	chr10	86958618	86963260	+	SNCG	protein_coding	HAVANA	86958698	86962982	ENSP00000344658.4|ENSP00000361087.3	ENSG00000173267
MTMR9LP	ENSG00000220785	116.624	-0.518865	0.0787447	-6.5892	4.42e-11	2.94e-10	ENSG00000220785.7	chr1	32231658	32241620	-	transcribed_unprocessed_pseudogene	HAVANA	NA	NA		ENSG00000220785	107.72	0.360562	0.12119	2.97517	0.00292828	0.0148779	ENSG00000220785.7	chr1	32231658	32241620	-	MTMR9LP	transcribed_unprocessed_pseudogene	HAVANA	NA	NA		ENSG00000220785
FXYD6	ENSG00000137726	109.62	-0.795186	0.121171	-6.56253	5.29e-11	3.49e-10	ENSG00000137726.16	chr11	117836976	117877486	-	protein_coding	HAVANA|ENSEMBL	117838226	117842776	ENSP00000442756.1|ENSP00000260282.4|ENSP00000431446.1|ENSP00000433312.1|ENSP00000431427.1|ENSP00000463160.1|ENSP00000436629.2|ENSP00000463158.1|ENSP00000431913.1|ENSP00000464144.1	ENSG00000137726	93.9364	0.625764	0.194206	3.22216	0.00127227	0.00731503	ENSG00000137726.16	chr11	117836976	117877486	-	FXYD6	protein_coding	HAVANA|ENSEMBL	117838226	117842776	ENSP00000442756.1|ENSP00000260282.4|ENSP00000431446.1|ENSP00000433312.1|ENSP00000431427.1|ENSP00000463160.1|ENSP00000436629.2|ENSP00000463158.1|ENSP00000431913.1|ENSP00000464144.1	ENSG00000137726
HBB	ENSG00000244734	145.1	-1.46401	0.224054	-6.53417	6.4e-11	4.19e-10	ENSG00000244734.3	chr11	5225464	5229395	-	protein_coding	HAVANA	5225601	5227021	ENSP00000333994.3|ENSP00000488004.1|ENSP00000369671.2	ENSG00000244734	92.251	1.16927	0.284541	4.10932	3.97e-05	0.00034754	ENSG00000244734.3	chr11	5225464	5229395	-	HBB	protein_coding	HAVANA	5225601	5227021	ENSP00000333994.3|ENSP00000488004.1|ENSP00000369671.2	ENSG00000244734
RP11-1391J7.1	ENSG00000250397	65.7147	-0.574377	0.0880677	-6.52199	6.94e-11	4.54e-10	ENSG00000250397.2	chr11	856880	859795	-	antisense	HAVANA	NA	NA		ENSG00000250397	59.6177	0.364237	0.128296	2.83904	0.00452492	0.0216022	ENSG00000250397.2	chr11	856880	859795	-	RP11-1391J7.1	antisense	HAVANA	NA	NA		ENSG00000250397
DPYSL2	ENSG00000092964	962.589	-0.599556	0.0938273	-6.39	1.66e-10	1.04e-09	ENSG00000092964.16	chr8	26514275	26658178	+	protein_coding	HAVANA	26577113	26655703	ENSP00000427985.1|ENSP00000427954.1|ENSP00000309539.5|ENSP00000431117.1	ENSG00000092964	871.704	0.525528	0.135187	3.88741	0.00010132	0.000806064	ENSG00000092964.16	chr8	26514275	26658178	+	DPYSL2	protein_coding	HAVANA	26577113	26655703	ENSP00000427985.1|ENSP00000427954.1|ENSP00000309539.5|ENSP00000431117.1	ENSG00000092964
APLF	ENSG00000169621	164.758	-0.436288	0.0684217	-6.37646	1.81e-10	1.14e-09	ENSG00000169621.9	chr2	68467561	68655862	+	protein_coding	HAVANA|ENSEMBL	68467732	68655573	ENSP00000307004.4|ENSP00000432297.1|ENSP00000393403.1|ENSP00000377874.2	ENSG00000169621	155.747	0.303897	0.108294	2.80622	0.00501262	0.0235423	ENSG00000169621.9	chr2	68467561	68655862	+	APLF	protein_coding	HAVANA|ENSEMBL	68467732	68655573	ENSP00000307004.4|ENSP00000432297.1|ENSP00000393403.1|ENSP00000377874.2	ENSG00000169621
DPY19L1	ENSG00000173852	192.806	-0.411128	0.0647226	-6.35215	2.12e-10	1.32e-09	ENSG00000173852.13	chr7	34928876	35038271	-	protein_coding	HAVANA|ENSEMBL	34931576	35037896	ENSP00000308695.4|ENSP00000478865.1|ENSP00000412745.1|ENSP00000400510.1	ENSG00000173852	183.236	0.266225	0.102583	2.59521	0.00945335	0.0398325	ENSG00000173852.13	chr7	34928876	35038271	-	DPY19L1	protein_coding	HAVANA|ENSEMBL	34931576	35037896	ENSP00000308695.4|ENSP00000478865.1|ENSP00000412745.1|ENSP00000400510.1	ENSG00000173852
EPB41L3	ENSG00000082397	470.133	-0.595954	0.0939439	-6.34372	2.24e-10	1.4e-09	ENSG00000082397.16	chr18	5392381	5630700	-	protein_coding	HAVANA|ENSEMBL	5393476	5577384	ENSP00000441174.1|ENSP00000341138.4|ENSP00000343158.2|ENSP00000382981.4|ENSP00000442091.2|ENSP00000488626.1|ENSP00000464570.2|ENSP00000488647.1|ENSP00000487786.1|ENSP00000487915.1|ENSP00000488095.1|ENSP00000488037.1|ENSP00000487780.1|ENSP00000462783.1|ENSP00000489405.1|ENSP00000464533.1|ENSP00000462692.1|ENSP00000464020.1|ENSP00000464148.1|ENSP00000463122.1|ENSP00000461937.1|ENSP00000463289.1|ENS…	ENSG00000082397	425.839	0.444457	0.146342	3.03711	0.0023886	0.0125251	ENSG00000082397.16	chr18	5392381	5630700	-	EPB41L3	protein_coding	HAVANA|ENSEMBL	5393476	5577384	ENSP00000441174.1|ENSP00000341138.4|ENSP00000343158.2|ENSP00000382981.4|ENSP00000442091.2|ENSP00000488626.1|ENSP00000464570.2|ENSP00000488647.1|ENSP00000487786.1|ENSP00000487915.1|ENSP00000488095.1|ENSP00000488037.1|ENSP00000487780.1|ENSP00000462783.1|ENSP00000489405.1|ENSP00000464533.1|ENSP00000462692.1|ENSP00000464020.1|ENSP00000464148.1|ENSP00000463122.1|ENSP00000461937.1|ENSP00000463289.1|ENS…	ENSG00000082397
EVC2	ENSG00000173040	188.383	-0.482281	0.0760337	-6.34299	2.25e-10	1.4e-09	ENSG00000173040.12	chr4	5542772	5709548	-	protein_coding	HAVANA	5543134	5708513	ENSP00000431981.1|ENSP00000342144.5|ENSP00000311683.2|ENSP00000423876.1	ENSG00000173040	175.704	0.309819	0.119807	2.58599	0.00971006	0.0407436	ENSG00000173040.12	chr4	5542772	5709548	-	EVC2	protein_coding	HAVANA	5543134	5708513	ENSP00000431981.1|ENSP00000342144.5|ENSP00000311683.2|ENSP00000423876.1	ENSG00000173040
CD93	ENSG00000125810	550.987	-0.645532	0.101907	-6.33451	2.38e-10	1.48e-09	ENSG00000125810.9	chr20	23079349	23086340	-	protein_coding	HAVANA	23083953	23086192	ENSP00000246006.4	ENSG00000125810	492.813	0.388605	0.143074	2.71611	0.00660541	0.0296701	ENSG00000125810.9	chr20	23079349	23086340	-	CD93	protein_coding	HAVANA	23083953	23086192	ENSP00000246006.4	ENSG00000125810
RP1-79C4.4	ENSG00000271811	109.489	-0.665684	0.105325	-6.32031	2.61e-10	1.61e-09	ENSG00000271811.1	chr1	170667381	170669425	+	lincRNA	HAVANA	NA	NA		ENSG00000271811	97.4156	0.57524	0.154917	3.71321	0.000204646	0.00150009	ENSG00000271811.1	chr1	170667381	170669425	+	RP1-79C4.4	lincRNA	HAVANA	NA	NA		ENSG00000271811
AC093110.3	ENSG00000238018	49.9238	-0.597328	0.0957691	-6.23717	4.46e-10	2.69e-09	ENSG00000238018.2	chr2	54661011	54680045	-	antisense	HAVANA	NA	NA		ENSG00000238018	45.0229	0.399362	0.144858	2.75691	0.00583495	0.026791	ENSG00000238018.2	chr2	54661011	54680045	-	AC093110.3	antisense	HAVANA	NA	NA		ENSG00000238018
EHBP1L1	ENSG00000173442	2034.46	-0.641089	0.103495	-6.1944	5.85e-10	3.49e-09	ENSG00000173442.12	chr11	65576038	65592650	+	protein_coding	HAVANA	65576303	65592299	ENSP00000312671.4|ENSP00000431996.1|ENSP00000489002.1|ENSP00000434693.1	ENSG00000173442	1822.55	0.415172	0.157335	2.63877	0.00832066	0.035886	ENSG00000173442.12	chr11	65576038	65592650	+	EHBP1L1	protein_coding	HAVANA	65576303	65592299	ENSP00000312671.4|ENSP00000431996.1|ENSP00000489002.1|ENSP00000434693.1	ENSG00000173442
ITGA9	ENSG00000144668	508.197	-0.542263	0.0890099	-6.09217	1.11e-09	6.47e-09	ENSG00000144668.11	chr3	37452115	37823514	+	protein_coding	HAVANA	37452375	37818986	ENSP00000397258.1|ENSP00000264741.5|ENSP00000406533.2	ENSG00000144668	467.089	0.619274	0.131476	4.71015	2.48e-06	2.79e-05	ENSG00000144668.11	chr3	37452115	37823514	+	ITGA9	protein_coding	HAVANA	37452375	37818986	ENSP00000397258.1|ENSP00000264741.5|ENSP00000406533.2	ENSG00000144668
PLN	ENSG00000198523	228.685	-0.795091	0.133559	-5.95311	2.63e-09	1.47e-08	ENSG00000198523.5	chr6	118548298	118560730	+	protein_coding	HAVANA	118558922	118559077	ENSP00000350132.5	ENSG00000198523	195.829	0.663134	0.185883	3.56748	0.000360437	0.00246349	ENSG00000198523.5	chr6	118548298	118560730	+	PLN	protein_coding	HAVANA	118558922	118559077	ENSP00000350132.5	ENSG00000198523
C1QTNF1	ENSG00000173918	328.668	-0.779675	0.132426	-5.88761	3.92e-09	2.16e-08	ENSG00000173918.14	chr17	79022814	79049788	+	protein_coding	HAVANA|ENSEMBL	79043969	79048085	ENSP00000463337.1|ENSP00000343230.4|ENSP00000462990.1|ENSP00000463922.1|ENSP00000340864.2|ENSP00000311265.4|ENSP00000376240.2|ENSP00000462481.2|ENSP00000463008.1|ENSP00000463108.1	ENSG00000173918	282.706	0.711151	0.186916	3.80465	0.000142004	0.00108547	ENSG00000173918.14	chr17	79022814	79049788	+	C1QTNF1	protein_coding	HAVANA|ENSEMBL	79043969	79048085	ENSP00000463337.1|ENSP00000343230.4|ENSP00000462990.1|ENSP00000463922.1|ENSP00000340864.2|ENSP00000311265.4|ENSP00000376240.2|ENSP00000462481.2|ENSP00000463008.1|ENSP00000463108.1	ENSG00000173918
TGFBI	ENSG00000120708	661.55	-0.572977	0.0993342	-5.76818	8.01e-09	4.29e-08	ENSG00000120708.16	chr5	136028895	136063818	+	protein_coding	HAVANA	136029056	136063223	ENSP00000416330.2|ENSP00000421540.1|ENSP00000423871.1|ENSP00000474155.1|ENSP00000421440.1|ENSP00000426589.1|ENSP00000423935.1|ENSP00000427137.1	ENSG00000120708	603.491	0.421617	0.157974	2.66891	0.00760985	0.0333234	ENSG00000120708.16	chr5	136028895	136063818	+	TGFBI	protein_coding	HAVANA	136029056	136063223	ENSP00000416330.2|ENSP00000421540.1|ENSP00000423871.1|ENSP00000474155.1|ENSP00000421440.1|ENSP00000426589.1|ENSP00000423935.1|ENSP00000427137.1	ENSG00000120708
FAXDC2	ENSG00000170271	370.401	-0.385505	0.0677128	-5.69324	1.25e-08	6.56e-08	ENSG00000170271.10	chr5	154818491	154859252	-	protein_coding	HAVANA	154820319	154838178	ENSP00000320604.5|ENSP00000430286.1|ENSP00000431084.1|ENSP00000428992.1|ENSP00000428834.1|ENSP00000429004.1|ENSP00000429837.1|ENSP00000429876.1|ENSP00000429406.1|ENSP00000431015.1	ENSG00000170271	354.121	0.40269	0.100893	3.99125	6.57e-05	0.000547123	ENSG00000170271.10	chr5	154818491	154859252	-	FAXDC2	protein_coding	HAVANA	154820319	154838178	ENSP00000320604.5|ENSP00000430286.1|ENSP00000431084.1|ENSP00000428992.1|ENSP00000428834.1|ENSP00000429004.1|ENSP00000429837.1|ENSP00000429876.1|ENSP00000429406.1|ENSP00000431015.1	ENSG00000170271
RUNX1T1	ENSG00000079102	421.753	-0.501918	0.0882573	-5.68699	1.29e-08	6.79e-08	ENSG00000079102.16	chr8	91954967	92103286	-	protein_coding	HAVANA|ENSEMBL	91960245	92102884	ENSP00000478331.1|ENSP00000481112.1|ENSP00000481799.1|ENSP00000402257.3|ENSP00000481315.1|ENSP00000265814.3|ENSP00000480500.1|ENSP00000428543.1|ENSP00000379520.1|ENSP00000353504.2|ENSP00000390137.2|ENSP00000428742.2|ENSP00000430728.1|ENSP00000430778.1|ENSP00000429085.1|ENSP00000430863.1|ENSP00000429728.1|ENSP00000431094.1|ENSP00000427763.1|ENSP00000430204.1|ENSP00000429940.1|ENSP00000429532.1|ENS…	ENSG00000079102	391.37	0.404915	0.113176	3.57774	0.000346582	0.00237797	ENSG00000079102.16	chr8	91954967	92103286	-	RUNX1T1	protein_coding	HAVANA|ENSEMBL	91960245	92102884	ENSP00000478331.1|ENSP00000481112.1|ENSP00000481799.1|ENSP00000402257.3|ENSP00000481315.1|ENSP00000265814.3|ENSP00000480500.1|ENSP00000428543.1|ENSP00000379520.1|ENSP00000353504.2|ENSP00000390137.2|ENSP00000428742.2|ENSP00000430728.1|ENSP00000430778.1|ENSP00000429085.1|ENSP00000430863.1|ENSP00000429728.1|ENSP00000431094.1|ENSP00000427763.1|ENSP00000430204.1|ENSP00000429940.1|ENSP00000429532.1|ENS…	ENSG00000079102
EDNRB	ENSG00000136160	265.051	-0.585377	0.103253	-5.66934	1.43e-08	7.49e-08	ENSG00000136160.14	chr13	77895481	77919768	-	protein_coding	HAVANA	77896445	77919615	ENSP00000366416.4|ENSP00000335311.5|ENSP00000486202.1|ENSP00000487082.1	ENSG00000136160	240.832	0.432659	0.157515	2.74677	0.00601848	0.0274683	ENSG00000136160.14	chr13	77895481	77919768	-	EDNRB	protein_coding	HAVANA	77896445	77919615	ENSP00000366416.4|ENSP00000335311.5|ENSP00000486202.1|ENSP00000487082.1	ENSG00000136160
PEAK1	ENSG00000173517	1473.13	-0.43468	0.0771565	-5.63375	1.76e-08	9.13e-08	ENSG00000173517.10	chr15	77100656	77420144	-	protein_coding	HAVANA|ENSEMBL	77114159	77181926	ENSP00000452796.2|ENSP00000309230.4|ENSP00000453924.1|ENSP00000457880.1|ENSP00000457602.1	ENSG00000173517	1392.47	0.524919	0.114587	4.58096	4.63e-06	4.97e-05	ENSG00000173517.10	chr15	77100656	77420144	-	PEAK1	protein_coding	HAVANA|ENSEMBL	77114159	77181926	ENSP00000452796.2|ENSP00000309230.4|ENSP00000453924.1|ENSP00000457880.1|ENSP00000457602.1	ENSG00000173517
S100A16	ENSG00000188643	94.4211	-0.563624	0.100906	-5.58564	2.33e-08	1.19e-07	ENSG00000188643.10	chr1	153606886	153613145	-	protein_coding	HAVANA	153607537	153608151	ENSP00000357693.1|ENSP00000357695.3|ENSP00000357692.1|ENSP00000357694.1	ENSG00000188643	86.6103	0.695204	0.157161	4.42352	9.71e-06	9.73e-05	ENSG00000188643.10	chr1	153606886	153613145	-	S100A16	protein_coding	HAVANA	153607537	153608151	ENSP00000357693.1|ENSP00000357695.3|ENSP00000357692.1|ENSP00000357694.1	ENSG00000188643
CYYR1	ENSG00000166265	97.2239	-0.503812	0.0907126	-5.55394	2.79e-08	1.41e-07	ENSG00000166265.11	chr21	26466209	26573284	-	protein_coding	HAVANA	26468504	26572940	ENSP00000299340.4|ENSP00000382918.3	ENSG00000166265	90.1231	0.361752	0.114256	3.16614	0.00154476	0.00865036	ENSG00000166265.11	chr21	26466209	26573284	-	CYYR1	protein_coding	HAVANA	26468504	26572940	ENSP00000299340.4|ENSP00000382918.3	ENSG00000166265
STOX2	ENSG00000173320	228.43	-0.600002	0.108076	-5.55167	2.83e-08	1.43e-07	ENSG00000173320.9	chr4	183853431	184023526	+	protein_coding	HAVANA	183906791	184017281	ENSP00000311257.4|ENSP00000425388.1|ENSP00000422118.1|ENSP00000426209.1	ENSG00000173320	206.548	0.667946	0.16595	4.02499	5.7e-05	0.000481497	ENSG00000173320.9	chr4	183853431	184023526	+	STOX2	protein_coding	HAVANA	183906791	184017281	ENSP00000311257.4|ENSP00000425388.1|ENSP00000422118.1|ENSP00000426209.1	ENSG00000173320
RCBTB2	ENSG00000136161	175.294	-0.323025	0.0582055	-5.54973	2.86e-08	1.45e-07	ENSG00000136161.12	chr13	48488959	48533256	-	protein_coding	HAVANA|ENSEMBL	48490114	48522364	ENSP00000345144.3|ENSP00000443862.1|ENSP00000389910.2|ENSP00000443904.2	ENSG00000136161	170.163	0.242429	0.0945231	2.56476	0.0103246	0.042813	ENSG00000136161.12	chr13	48488959	48533256	-	RCBTB2	protein_coding	HAVANA|ENSEMBL	48490114	48522364	ENSP00000345144.3|ENSP00000443862.1|ENSP00000389910.2|ENSP00000443904.2	ENSG00000136161
RHOJ	ENSG00000126785	150.716	-0.516231	0.0932082	-5.53848	3.05e-08	1.54e-07	ENSG00000126785.12	chr14	63204114	63293219	+	protein_coding	HAVANA	63204870	63291181	ENSP00000451796.1|ENSP00000316729.3|ENSP00000451643.1	ENSG00000126785	139.433	0.586165	0.132926	4.40971	1.04e-05	0.000103203	ENSG00000126785.12	chr14	63204114	63293219	+	RHOJ	protein_coding	HAVANA	63204870	63291181	ENSP00000451796.1|ENSP00000316729.3|ENSP00000451643.1	ENSG00000126785
ARHGAP20	ENSG00000137727	158.444	-0.612791	0.110855	-5.52787	3.24e-08	1.63e-07	ENSG00000137727.12	chr11	110577042	110713189	-	protein_coding	HAVANA	110577143	110712231	ENSP00000260283.4|ENSP00000437905.1|ENSP00000432076.1|ENSP00000436319.1|ENSP00000436522.1|ENSP00000431399.1	ENSG00000137727	142.687	0.622894	0.154544	4.03053	5.57e-05	0.000471356	ENSG00000137727.12	chr11	110577042	110713189	-	ARHGAP20	protein_coding	HAVANA	110577143	110712231	ENSP00000260283.4|ENSP00000437905.1|ENSP00000432076.1|ENSP00000436319.1|ENSP00000436522.1|ENSP00000431399.1	ENSG00000137727
TNFRSF10B	ENSG00000120889	312.734	-0.310851	0.0562633	-5.52493	3.3e-08	1.66e-07	ENSG00000120889.12	chr8	23020133	23069179	-	protein_coding	HAVANA	23022674	23068894	ENSP00000276431.4|ENSP00000317859.3|ENSP00000427999.1	ENSG00000120889	304.742	0.2217	0.0878643	2.52321	0.0116289	0.0471986	ENSG00000120889.12	chr8	23020133	23069179	-	TNFRSF10B	protein_coding	HAVANA	23022674	23068894	ENSP00000276431.4|ENSP00000317859.3|ENSP00000427999.1	ENSG00000120889
RSU1	ENSG00000148484	332.551	-0.359933	0.066176	-5.43902	5.36e-08	2.64e-07	ENSG00000148484.17	chr10	16590611	16817528	-	protein_coding	HAVANA|ENSEMBL	16593397	16817081	ENSP00000367154.3|ENSP00000339521.5|ENSP00000473588.1	ENSG00000148484	320.272	0.258647	0.102063	2.5342	0.0112705	0.0461032	ENSG00000148484.17	chr10	16590611	16817528	-	RSU1	protein_coding	HAVANA|ENSEMBL	16593397	16817081	ENSP00000367154.3|ENSP00000339521.5|ENSP00000473588.1	ENSG00000148484
NAA16	ENSG00000172766	340.401	-0.278191	0.0514571	-5.40627	6.43e-08	3.14e-07	ENSG00000172766.18	chr13	41311205	41377030	+	protein_coding	HAVANA	41311529	41375599	ENSP00000368716.3|ENSP00000386103.3|ENSP00000432364.1	ENSG00000172766	334.145	0.200632	0.0802304	2.50069	0.012395	0.0497295	ENSG00000172766.18	chr13	41311205	41377030	+	NAA16	protein_coding	HAVANA	41311529	41375599	ENSP00000368716.3|ENSP00000386103.3|ENSP00000432364.1	ENSG00000172766
AQP1	ENSG00000240583	421.021	-0.669224	0.12424	-5.38655	7.18e-08	3.49e-07	ENSG00000240583.10	chr7	30911855	30925516	+	protein_coding	HAVANA|ENSEMBL	30911910	30923626	ENSP00000311165.4|ENSP00000405698.2|ENSP00000386712.1|ENSP00000387178.1	ENSG00000240583	373.899	0.734195	0.157215	4.67001	3.01e-06	3.34e-05	ENSG00000240583.10	chr7	30911855	30925516	+	AQP1	protein_coding	HAVANA|ENSEMBL	30911910	30923626	ENSP00000311165.4|ENSP00000405698.2|ENSP00000386712.1|ENSP00000387178.1	ENSG00000240583
ITGA7	ENSG00000135424	557.898	-0.714314	0.132939	-5.37324	7.73e-08	3.75e-07	ENSG00000135424.15	chr12	55684568	55716043	-	protein_coding	HAVANA	55685061	55712269	ENSP00000452120.1|ENSP00000257879.6|ENSP00000450693.1|ENSP00000343009.6|ENSP00000393844.2|ENSP00000452387.1|ENSP00000451039.1|ENSP00000450679.1|ENSP00000450578.1|ENSP00000451311.1|ENSP00000452043.1|ENSP00000452467.1|ENSP00000450798.1	ENSG00000135424	488.969	0.934407	0.160255	5.83074	5.52e-09	9.71e-08	ENSG00000135424.15	chr12	55684568	55716043	-	ITGA7	protein_coding	HAVANA	55685061	55712269	ENSP00000452120.1|ENSP00000257879.6|ENSP00000450693.1|ENSP00000343009.6|ENSP00000393844.2|ENSP00000452387.1|ENSP00000451039.1|ENSP00000450679.1|ENSP00000450578.1|ENSP00000451311.1|ENSP00000452043.1|ENSP00000452467.1|ENSP00000450798.1	ENSG00000135424
HBA2	ENSG00000188536	32.268	-1.34253	0.255579	-5.25292	1.5e-07	7.06e-07	ENSG00000188536.12	chr16	172847	173710	+	protein_coding	HAVANA	172913	173597	ENSP00000251595.6|ENSP00000380908.1	ENSG00000188536	21.5158	1.49189	0.339871	4.38957	1.14e-05	0.000112479	ENSG00000188536.12	chr16	172847	173710	+	HBA2	protein_coding	HAVANA	172913	173597	ENSP00000251595.6|ENSP00000380908.1	ENSG00000188536
LMBR1L	ENSG00000139636	387.407	-0.253516	0.0485523	-5.22151	1.77e-07	8.3e-07	ENSG00000139636.15	chr12	49096551	49110900	-	protein_coding	HAVANA	49097675	49110555	ENSP00000267102.8|ENSP00000394677.1|ENSP00000447329.1|ENSP00000448821.1|ENSP00000448147.1|ENSP00000446718.1|ENSP00000450362.1|ENSP00000413785.2|ENSP00000447240.1|ENSP00000448128.1|ENSP00000449103.1|ENSP00000446641.1|ENSP00000450032.1|ENSP00000449633.1|ENSP00000448973.1	ENSG00000139636	382.505	0.20646	0.0739002	2.79376	0.00520986	0.0243268	ENSG00000139636.15	chr12	49096551	49110900	-	LMBR1L	protein_coding	HAVANA	49097675	49110555	ENSP00000267102.8|ENSP00000394677.1|ENSP00000447329.1|ENSP00000448821.1|ENSP00000448147.1|ENSP00000446718.1|ENSP00000450362.1|ENSP00000413785.2|ENSP00000447240.1|ENSP00000448128.1|ENSP00000449103.1|ENSP00000446641.1|ENSP00000450032.1|ENSP00000449633.1|ENSP00000448973.1	ENSG00000139636
AP001442.2	ENSG00000233783	100.552	-0.425247	0.0816117	-5.21062	1.88e-07	8.77e-07	ENSG00000233783.7	chr21	25928754	25942686	+	processed_transcript	HAVANA	NA	NA		ENSG00000233783	95.1649	0.416361	0.130091	3.20054	0.00137168	0.00780334	ENSG00000233783.7	chr21	25928754	25942686	+	AP001442.2	processed_transcript	HAVANA	NA	NA		ENSG00000233783
ITSN1	ENSG00000205726	1128.91	-0.357644	0.0706562	-5.06176	4.15e-07	1.87e-06	ENSG00000205726.13	chr21	33642400	33899861	+	protein_coding	HAVANA|ENSEMBL	33718829	33888297	ENSP00000382290.1|ENSP00000400079.1|ENSP00000370719.3|ENSP00000387377.3|ENSP00000370691.4|ENSP00000370685.5|ENSP00000382301.3|ENSP00000382289.1|ENSP00000382292.2|ENSP00000382286.1|ENSP00000407132.1|ENSP00000370683.3|ENSP00000382275.4|ENSP00000411464.1|ENSP00000369294.6|ENSP00000415302.1|ENSP00000396054.1|ENSP00000413290.1|ENSP00000370684.3|ENSP00000408319.1|ENSP00000409800.1	ENSG00000205726	1087.01	0.602072	0.0872918	6.89724	5.3e-12	1.41e-10	ENSG00000205726.13	chr21	33642400	33899861	+	ITSN1	protein_coding	HAVANA|ENSEMBL	33718829	33888297	ENSP00000382290.1|ENSP00000400079.1|ENSP00000370719.3|ENSP00000387377.3|ENSP00000370691.4|ENSP00000370685.5|ENSP00000382301.3|ENSP00000382289.1|ENSP00000382292.2|ENSP00000382286.1|ENSP00000407132.1|ENSP00000370683.3|ENSP00000382275.4|ENSP00000411464.1|ENSP00000369294.6|ENSP00000415302.1|ENSP00000396054.1|ENSP00000413290.1|ENSP00000370684.3|ENSP00000408319.1|ENSP00000409800.1	ENSG00000205726
MET	ENSG00000105976	248.357	-0.532834	0.105392	-5.05576	4.29e-07	1.92e-06	ENSG00000105976.14	chr7	116672390	116798386	+	protein_coding	HAVANA|ENSEMBL	116695757	116796121	ENSP00000413857.1|ENSP00000380860.3|ENSP00000317272.6|ENSP00000410980.2|ENSP00000398776.1|ENSP00000398140.1	ENSG00000105976	228.737	0.839355	0.153993	5.4506	5.02e-08	7.55e-07	ENSG00000105976.14	chr7	116672390	116798386	+	MET	protein_coding	HAVANA|ENSEMBL	116695757	116796121	ENSP00000413857.1|ENSP00000380860.3|ENSP00000317272.6|ENSP00000410980.2|ENSP00000398776.1|ENSP00000398140.1	ENSG00000105976
EMCN	ENSG00000164035	175.737	-0.558079	0.110708	-5.041	4.63e-07	2.07e-06	ENSG00000164035.9	chr4	100395341	100880126	-	protein_coding	HAVANA	100410324	100517914	ENSP00000296420.4|ENSP00000304780.3|ENSP00000426515.1|ENSP00000422432.1|ENSP00000427608.1	ENSG00000164035	160.675	0.379888	0.142511	2.66567	0.00768346	0.0335951	ENSG00000164035.9	chr4	100395341	100880126	-	EMCN	protein_coding	HAVANA	100410324	100517914	ENSP00000296420.4|ENSP00000304780.3|ENSP00000426515.1|ENSP00000422432.1|ENSP00000427608.1	ENSG00000164035
IFITM2	ENSG00000185201	241.018	-0.557154	0.111147	-5.01278	5.37e-07	2.38e-06	ENSG00000185201.16	chr11	307631	315272	+	protein_coding	HAVANA|ENSEMBL	308193	315110	ENSP00000434443.1|ENSP00000484689.1|ENSP00000382714.4|ENSP00000473587.1|ENSP00000431850.1|ENSP00000382712.2	ENSG00000185201	220.905	0.603834	0.171781	3.51514	0.000439528	0.00292418	ENSG00000185201.16	chr11	307631	315272	+	IFITM2	protein_coding	HAVANA|ENSEMBL	308193	315110	ENSP00000434443.1|ENSP00000484689.1|ENSP00000382714.4|ENSP00000473587.1|ENSP00000431850.1|ENSP00000382712.2	ENSG00000185201
CFD	ENSG00000197766	198.322	-0.866573	0.173231	-5.00241	5.66e-07	2.5e-06	ENSG00000197766.7	chr19	859643	863630	+	protein_coding	HAVANA	859690	863235	ENSP00000332139.4|ENSP00000468253.1	ENSG00000197766	166.426	1.04387	0.225994	4.61903	3.86e-06	4.2e-05	ENSG00000197766.7	chr19	859643	863630	+	CFD	protein_coding	HAVANA	859690	863235	ENSP00000332139.4|ENSP00000468253.1	ENSG00000197766
EPAS1	ENSG00000116016	1900.56	-0.514634	0.104021	-4.94739	7.52e-07	3.28e-06	ENSG00000116016.13	chr2	46293667	46386703	+	protein_coding	HAVANA	46297912	46384657	ENSP00000406137.1|ENSP00000263734.3	ENSG00000116016	1760.46	0.553266	0.139636	3.9622	7.43e-05	0.000608848	ENSG00000116016.13	chr2	46293667	46386703	+	EPAS1	protein_coding	HAVANA	46297912	46384657	ENSP00000406137.1|ENSP00000263734.3	ENSG00000116016
PTGS1	ENSG00000095303	182.29	-0.592209	0.120142	-4.92926	8.25e-07	3.58e-06	ENSG00000095303.14	chr9	122370530	122395703	+	protein_coding	HAVANA|ENSEMBL	122371085	122392541	ENSP00000437709.1|ENSP00000484800.1|ENSP00000223423.4|ENSP00000354612.2|ENSP00000483540.1|ENSP00000411606.1|ENSP00000362802.5	ENSG00000095303	200.796	0.691264	0.258289	2.67632	0.00744355	0.0327278	ENSG00000095303.14	chr9	122370530	122395703	+	PTGS1	protein_coding	HAVANA|ENSEMBL	122371085	122392541	ENSP00000437709.1|ENSP00000484800.1|ENSP00000223423.4|ENSP00000354612.2|ENSP00000483540.1|ENSP00000411606.1|ENSP00000362802.5	ENSG00000095303
FGD6	ENSG00000180263	405.529	-0.294695	0.0598652	-4.92264	8.54e-07	3.7e-06	ENSG00000180263.13	chr12	95076749	95217482	-	protein_coding	HAVANA	95081497	95217240	ENSP00000344446.4|ENSP00000448350.1|ENSP00000408291.3|ENSP00000450342.1|ENSP00000450240.1|ENSP00000449005.1	ENSG00000180263	396.524	0.331222	0.0920049	3.60005	0.000318158	0.00220342	ENSG00000180263.13	chr12	95076749	95217482	-	FGD6	protein_coding	HAVANA	95081497	95217240	ENSP00000344446.4|ENSP00000448350.1|ENSP00000408291.3|ENSP00000450342.1|ENSP00000450240.1|ENSP00000449005.1	ENSG00000180263
SRPX	ENSG00000101955	102.755	-0.635655	0.129707	-4.9007	9.55e-07	4.11e-06	ENSG00000101955.14	chrX	38149336	38220924	-	protein_coding	HAVANA|ENSEMBL	38149714	38220792	ENSP00000411165.2|ENSP00000440758.1|ENSP00000445034.1|ENSP00000367794.3	ENSG00000101955	92.0499	0.757981	0.192812	3.9312	8.45e-05	0.00068573	ENSG00000101955.14	chrX	38149336	38220924	-	SRPX	protein_coding	HAVANA|ENSEMBL	38149714	38220792	ENSP00000411165.2|ENSP00000440758.1|ENSP00000445034.1|ENSP00000367794.3	ENSG00000101955
AHR	ENSG00000106546	672.984	-0.462177	0.094395	-4.89621	9.77e-07	4.2e-06	ENSG00000106546.12	chr7	17298622	17346152	+	protein_coding	HAVANA	17299265	17343061	ENSP00000242057.4|ENSP00000436466.1	ENSG00000106546	631.969	0.444325	0.13656	3.25369	0.00113916	0.00665758	ENSG00000106546.12	chr7	17298622	17346152	+	AHR	protein_coding	HAVANA	17299265	17343061	ENSP00000242057.4|ENSP00000436466.1	ENSG00000106546
NRP2	ENSG00000118257	697.349	-0.549596	0.112277	-4.89502	9.83e-07	4.23e-06	ENSG00000118257.16	chr2	205681990	205798133	+	protein_coding	HAVANA	205683291	205795055	ENSP00000353582.3|ENSP00000404279.1|ENSP00000387519.1|ENSP00000349632.4|ENSP00000350432.5|ENSP00000272849.3|ENSP00000407626.2	ENSG00000118257	639.795	0.703808	0.177623	3.96236	7.42e-05	0.000608544	ENSG00000118257.16	chr2	205681990	205798133	+	NRP2	protein_coding	HAVANA	205683291	205795055	ENSP00000353582.3|ENSP00000404279.1|ENSP00000387519.1|ENSP00000349632.4|ENSP00000350432.5|ENSP00000272849.3|ENSP00000407626.2	ENSG00000118257
FUT10	ENSG00000172728	125.872	-0.327428	0.0670502	-4.88332	1.04e-06	4.47e-06	ENSG00000172728.15	chr8	33370824	33473422	-	protein_coding	HAVANA	33372580	33461452	ENSP00000332757.5|ENSP00000430428.1|ENSP00000429870.1	ENSG00000172728	121.848	0.257886	0.103116	2.50092	0.012387	0.0497062	ENSG00000172728.15	chr8	33370824	33473422	-	FUT10	protein_coding	HAVANA	33372580	33461452	ENSP00000332757.5|ENSP00000430428.1|ENSP00000429870.1	ENSG00000172728
HBA1	ENSG00000206172	26.4053	-1.24146	0.256017	-4.84914	1.24e-06	5.26e-06	ENSG00000206172.8	chr16	176680	177522	+	protein_coding	HAVANA	176717	177408	ENSP00000322421.5|ENSP00000380899.1	ENSG00000206172	17.8378	1.42182	0.334805	4.24672	2.17e-05	0.000201245	ENSG00000206172.8	chr16	176680	177522	+	HBA1	protein_coding	HAVANA	176717	177408	ENSP00000322421.5|ENSP00000380899.1	ENSG00000206172
UST	ENSG00000111962	171.726	-0.381522	0.0789749	-4.83093	1.36e-06	5.74e-06	ENSG00000111962.7	chr6	148747328	149076990	+	protein_coding	HAVANA	148747431	149074113	ENSP00000356433.4	ENSG00000111962	164.38	0.458457	0.125599	3.65015	0.000262089	0.00186349	ENSG00000111962.7	chr6	148747328	149076990	+	UST	protein_coding	HAVANA	148747431	149074113	ENSP00000356433.4	ENSG00000111962
OLFML1	ENSG00000183801	175.587	-0.394862	0.0817828	-4.82818	1.38e-06	5.81e-06	ENSG00000183801.7	chr11	7485388	7511377	+	protein_coding	HAVANA	7485876	7510185	ENSP00000433455.1|ENSP00000332511.3|ENSP00000431558.1|ENSP00000434813.1	ENSG00000183801	167.557	0.505223	0.12554	4.02438	5.71e-05	0.000482549	ENSG00000183801.7	chr11	7485388	7511377	+	OLFML1	protein_coding	HAVANA	7485876	7510185	ENSP00000433455.1|ENSP00000332511.3|ENSP00000431558.1|ENSP00000434813.1	ENSG00000183801
TSPAN18	ENSG00000157570	291.195	-0.52536	0.109388	-4.80271	1.57e-06	6.57e-06	ENSG00000157570.11	chr11	44726465	44932421	+	protein_coding	HAVANA|ENSEMBL	44897809	44930963	ENSP00000433592.1|ENSP00000434625.1|ENSP00000433362.1|ENSP00000429993.2|ENSP00000427942.2|ENSP00000339820.3|ENSP00000430343.1|ENSP00000429020.2	ENSG00000157570	268.68	0.689606	0.164791	4.18472	2.86e-05	0.00025812	ENSG00000157570.11	chr11	44726465	44932421	+	TSPAN18	protein_coding	HAVANA|ENSEMBL	44897809	44930963	ENSP00000433592.1|ENSP00000434625.1|ENSP00000433362.1|ENSP00000429993.2|ENSP00000427942.2|ENSP00000339820.3|ENSP00000430343.1|ENSP00000429020.2	ENSG00000157570
GPX3	ENSG00000211445	586.75	-0.689394	0.143552	-4.80239	1.57e-06	6.58e-06	ENSG00000211445.11	chr5	151020438	151028993	+	protein_coding	HAVANA|ENSEMBL	151020655	151028161	ENSP00000484258.1|ENSP00000373477.4|ENSP00000483660.1|ENSP00000427873.1|ENSP00000430508.1|ENSP00000429709.1|ENSP00000430743.1|ENSP00000429314.1	ENSG00000211445	518.417	0.962433	0.20555	4.68224	2.84e-06	3.17e-05	ENSG00000211445.11	chr5	151020438	151028993	+	GPX3	protein_coding	HAVANA|ENSEMBL	151020655	151028161	ENSP00000484258.1|ENSP00000373477.4|ENSP00000483660.1|ENSP00000427873.1|ENSP00000430508.1|ENSP00000429709.1|ENSP00000430743.1|ENSP00000429314.1	ENSG00000211445
PYGM	ENSG00000068976	152.376	-0.737694	0.153781	-4.79703	1.61e-06	6.75e-06	ENSG00000068976.13	chr11	64746389	64760297	-	protein_coding	HAVANA	64746662	64759898	ENSP00000366650.3|ENSP00000164139.3	ENSG00000068976	132.539	0.640787	0.198853	3.22241	0.00127115	0.0073104	ENSG00000068976.13	chr11	64746389	64760297	-	PYGM	protein_coding	HAVANA	64746662	64759898	ENSP00000366650.3|ENSP00000164139.3	ENSG00000068976
FAM92A1	ENSG00000188343	178.98	-0.251358	0.0525352	-4.78458	1.71e-06	7.16e-06	ENSG00000188343.12	chr8	93698561	93731527	+	protein_coding	HAVANA|ENSEMBL	93700648	93728294	ENSP00000430217.1|ENSP00000428446.1|ENSP00000391671.2|ENSP00000429367.1|ENSP00000430069.1|ENSP00000352391.5|ENSP00000428739.1|ENSP00000401774.2|ENSP00000478089.1|ENSP00000429722.1|ENSP00000428065.1|ENSP00000430812.1|ENSP00000427991.1|ENSP00000428633.1|ENSP00000428874.1|ENSP00000428751.1|ENSP00000429955.1	ENSG00000188343	176.331	0.19083	0.0755244	2.52673	0.0115129	0.0468429	ENSG00000188343.12	chr8	93698561	93731527	+	FAM92A1	protein_coding	HAVANA|ENSEMBL	93700648	93728294	ENSP00000430217.1|ENSP00000428446.1|ENSP00000391671.2|ENSP00000429367.1|ENSP00000430069.1|ENSP00000352391.5|ENSP00000428739.1|ENSP00000401774.2|ENSP00000478089.1|ENSP00000429722.1|ENSP00000428065.1|ENSP00000430812.1|ENSP00000427991.1|ENSP00000428633.1|ENSP00000428874.1|ENSP00000428751.1|ENSP00000429955.1	ENSG00000188343
TMEM132C	ENSG00000181234	112.798	-0.746084	0.156526	-4.76652	1.87e-06	7.79e-06	ENSG00000181234.9	chr12	128267403	128707915	+	protein_coding	HAVANA	128267403	128706292	ENSP00000410852.2	ENSG00000181234	97.9154	0.828235	0.239056	3.46461	0.000530995	0.00344676	ENSG00000181234.9	chr12	128267403	128707915	+	TMEM132C	protein_coding	HAVANA	128267403	128706292	ENSP00000410852.2	ENSG00000181234
RP11-417F21.1	ENSG00000250116	102.479	-0.492359	0.103315	-4.76563	1.88e-06	7.82e-06	ENSG00000250116.2	chr2	46568256	46580238	-	antisense	HAVANA	NA	NA		ENSG00000250116	95.5115	0.40925	0.152857	2.67734	0.0074209	0.032638	ENSG00000250116.2	chr2	46568256	46580238	-	RP11-417F21.1	antisense	HAVANA	NA	NA		ENSG00000250116
FOSB	ENSG00000125740	2024.98	-1.13438	0.238102	-4.76424	1.9e-06	7.88e-06	ENSG00000125740.13	chr19	45467995	45475179	+	protein_coding	HAVANA|ENSEMBL	45468587	45473009	ENSP00000485018.1|ENSP00000467497.1|ENSP00000407207.1|ENSP00000245919.3|ENSP00000466530.1|ENSP00000414177.1|ENSP00000465068.1|ENSP00000465552.1|ENSP00000468482.1|ENSP00000468207.1|ENSP00000465528.1	ENSG00000125740	1559.81	1.07769	0.326402	3.30171	0.000960966	0.00574627	ENSG00000125740.13	chr19	45467995	45475179	+	FOSB	protein_coding	HAVANA|ENSEMBL	45468587	45473009	ENSP00000485018.1|ENSP00000467497.1|ENSP00000407207.1|ENSP00000245919.3|ENSP00000466530.1|ENSP00000414177.1|ENSP00000465068.1|ENSP00000465552.1|ENSP00000468482.1|ENSP00000468207.1|ENSP00000465528.1	ENSG00000125740
SLC8A1-AS1	ENSG00000227028	183.448	-0.52362	0.110012	-4.75967	1.94e-06	8.04e-06	ENSG00000227028.6	chr2	39786453	40255209	+	antisense	HAVANA	NA	NA		ENSG00000227028	168.991	0.512854	0.15857	3.23425	0.00121962	0.00705625	ENSG00000227028.6	chr2	39786453	40255209	+	SLC8A1-AS1	antisense	HAVANA	NA	NA		ENSG00000227028
TRHDE-AS1	ENSG00000236333	113.192	-0.740225	0.155578	-4.75792	1.96e-06	8.11e-06	ENSG00000236333.3	chr12	72253508	72274907	-	processed_transcript	HAVANA	NA	NA		ENSG00000236333	98.3853	0.530293	0.204917	2.58784	0.00965799	0.0405597	ENSG00000236333.3	chr12	72253508	72274907	-	TRHDE-AS1	processed_transcript	HAVANA	NA	NA		ENSG00000236333
FAM162B	ENSG00000183807	23.3248	-0.532355	0.111961	-4.75483	1.99e-06	8.23e-06	ENSG00000183807.7	chr6	116752197	116765723	-	protein_coding	HAVANA	116752600	116765576	ENSP00000357545.4	ENSG00000183807	21.4408	0.688329	0.173104	3.97638	7e-05	0.000578281	ENSG00000183807.7	chr6	116752197	116765723	-	FAM162B	protein_coding	HAVANA	116752600	116765576	ENSP00000357545.4	ENSG00000183807
ZNF676	ENSG00000196109	29.2857	-0.566125	0.119113	-4.75285	2.01e-06	8.3e-06	ENSG00000196109.6	chr19	22179091	22196951	-	protein_coding	HAVANA	22179953	22196633	ENSP00000380310.1	ENSG00000196109	26.8284	0.592343	0.190594	3.10788	0.00188438	0.0102578	ENSG00000196109.6	chr19	22179091	22196951	-	ZNF676	protein_coding	HAVANA	22179953	22196633	ENSP00000380310.1	ENSG00000196109
CEP126	ENSG00000110318	221.446	-0.400162	0.0843177	-4.74588	2.08e-06	8.59e-06	ENSG00000110318.13	chr11	101915015	102001058	+	protein_coding	HAVANA	101915285	101997640	ENSP00000263468.8|ENSP00000433643.1|ENSP00000437014.1	ENSG00000110318	210.909	0.535022	0.125849	4.2513	2.13e-05	0.000197418	ENSG00000110318.13	chr11	101915015	102001058	+	CEP126	protein_coding	HAVANA	101915285	101997640	ENSP00000263468.8|ENSP00000433643.1|ENSP00000437014.1	ENSG00000110318
ARHGAP23	ENSG00000275832	400.53	-0.48969	0.103256	-4.74248	2.11e-06	8.73e-06	ENSG00000275832.4	chr17	38419280	38512392	+	protein_coding	HAVANA	38428486	38510969	ENSP00000481862.1|ENSP00000482992.1|ENSP00000482982.1|ENSP00000483748.1|ENSP00000481292.1|ENSP00000482425.1|ENSP00000478142.1|ENSP00000484509.1	ENSG00000275832	373.204	0.888039	0.148522	5.97916	2.24e-09	4.19e-08	ENSG00000275832.4	chr17	38419280	38512392	+	ARHGAP23	protein_coding	HAVANA	38428486	38510969	ENSP00000481862.1|ENSP00000482992.1|ENSP00000482982.1|ENSP00000483748.1|ENSP00000481292.1|ENSP00000482425.1|ENSP00000478142.1|ENSP00000484509.1	ENSG00000275832
C20orf194	ENSG00000088854	515.171	-0.278121	0.0587654	-4.73273	2.22e-06	9.14e-06	ENSG00000088854.12	chr20	3249305	3407625	-	protein_coding	HAVANA	3252575	3407557	ENSP00000252032.9	ENSG00000088854	505.642	0.436658	0.0840813	5.19328	2.07e-07	2.81e-06	ENSG00000088854.12	chr20	3249305	3407625	-	C20orf194	protein_coding	HAVANA	3252575	3407557	ENSP00000252032.9	ENSG00000088854
SLC48A1	ENSG00000211584	238.105	-0.251177	0.0532386	-4.71794	2.38e-06	9.79e-06	ENSG00000211584.13	chr12	47753916	47782753	+	protein_coding	HAVANA	47773305	47780278	ENSP00000450234.1|ENSP00000446739.1|ENSP00000446686.1|ENSP00000410134.2|ENSP00000415998.2|ENSP00000449036.1	ENSG00000211584	234.918	0.226328	0.0736157	3.07445	0.00210894	0.0112588	ENSG00000211584.13	chr12	47753916	47782753	+	SLC48A1	protein_coding	HAVANA	47773305	47780278	ENSP00000450234.1|ENSP00000446739.1|ENSP00000446686.1|ENSP00000410134.2|ENSP00000415998.2|ENSP00000449036.1	ENSG00000211584
ACAA2	ENSG00000167315	140.07	-0.379515	0.0804489	-4.71747	2.39e-06	9.81e-06	ENSG00000167315.17	chr18	49782167	49813960	-	protein_coding	HAVANA	49783850	49813823	ENSP00000285093.8|ENSP00000466466.1|ENSP00000466015.1|ENSP00000465045.1|ENSP00000465095.1|ENSP00000468157.1	ENSG00000167315	134.236	0.441608	0.125145	3.52878	0.00041748	0.00279724	ENSG00000167315.17	chr18	49782167	49813960	-	ACAA2	protein_coding	HAVANA	49783850	49813823	ENSP00000285093.8|ENSP00000466466.1|ENSP00000466015.1|ENSP00000465045.1|ENSP00000465095.1|ENSP00000468157.1	ENSG00000167315
TSPAN11	ENSG00000110900	128.446	-0.382901	0.0812867	-4.71049	2.47e-06	1.01e-05	ENSG00000110900.14	chr12	30926428	30996599	+	protein_coding	HAVANA	30953992	30991912	ENSP00000443890.1|ENSP00000437403.1|ENSP00000445503.1|ENSP00000261177.9	ENSG00000110900	122.864	0.286781	0.11422	2.51078	0.0120465	0.0485645	ENSG00000110900.14	chr12	30926428	30996599	+	TSPAN11	protein_coding	HAVANA	30953992	30991912	ENSP00000443890.1|ENSP00000437403.1|ENSP00000445503.1|ENSP00000261177.9	ENSG00000110900
SPRED1	ENSG00000166068	503.891	-0.337284	0.0718081	-4.69702	2.64e-06	1.08e-05	ENSG00000166068.12	chr15	38252326	38357249	+	protein_coding	HAVANA	38253186	38351661	ENSP00000299084.4|ENSP00000453680.1	ENSG00000166068	487.878	0.552331	0.0993007	5.5622	2.66e-08	4.18e-07	ENSG00000166068.12	chr15	38252326	38357249	+	SPRED1	protein_coding	HAVANA	38253186	38351661	ENSP00000299084.4|ENSP00000453680.1	ENSG00000166068
STOM	ENSG00000148175	986.166	-0.539882	0.11497	-4.69587	2.65e-06	1.08e-05	ENSG00000148175.12	chr9	121338988	121370304	-	protein_coding	HAVANA|ENSEMBL	121339624	121370187	ENSP00000445764.2|ENSP00000286713.2|ENSP00000339607.2	ENSG00000148175	907.835	1.03018	0.16262	6.33489	2.38e-10	5.11e-09	ENSG00000148175.12	chr9	121338988	121370304	-	STOM	protein_coding	HAVANA|ENSEMBL	121339624	121370187	ENSP00000445764.2|ENSP00000286713.2|ENSP00000339607.2	ENSG00000148175
RASL11A	ENSG00000122035	74.2525	-0.530219	0.114554	-4.62854	3.68e-06	1.48e-05	ENSG00000122035.6	chr13	27270327	27273690	+	protein_coding	HAVANA	27270945	27273491	ENSP00000241463.4	ENSG00000122035	68.5076	0.531062	0.167363	3.17312	0.00150808	0.00847909	ENSG00000122035.6	chr13	27270327	27273690	+	RASL11A	protein_coding	HAVANA	27270945	27273491	ENSP00000241463.4	ENSG00000122035
TINAGL1	ENSG00000142910	356.497	-0.520125	0.112736	-4.61364	3.96e-06	1.58e-05	ENSG00000142910.15	chr1	31576485	31587686	+	protein_coding	HAVANA|ENSEMBL	31577149	31586976	ENSP00000395137.2|ENSP00000271064.7|ENSP00000445392.2	ENSG00000142910	329.516	0.896288	0.142722	6.27994	3.39e-10	7.12e-09	ENSG00000142910.15	chr1	31576485	31587686	+	TINAGL1	protein_coding	HAVANA|ENSEMBL	31577149	31586976	ENSP00000395137.2|ENSP00000271064.7|ENSP00000445392.2	ENSG00000142910
DNM3OS	ENSG00000230630	133.57	-0.449409	0.0976162	-4.60383	4.15e-06	1.66e-05	ENSG00000230630.2	chr1	172136531	172144794	-	antisense	HAVANA	NA	NA		ENSG00000230630	125.725	0.962035	0.13876	6.93308	4.12e-12	1.12e-10	ENSG00000230630.2	chr1	172136531	172144794	-	DNM3OS	antisense	HAVANA	NA	NA		ENSG00000230630
RP11-831F12.2	ENSG00000258400	11.9029	-0.463101	0.102515	-4.51741	6.26e-06	2.45e-05	ENSG00000258400.1	chr14	49707667	49708792	-	antisense	HAVANA	NA	NA		ENSG00000258400	10.9713	0.426719	0.163174	2.61512	0.00891971	0.0380327	ENSG00000258400.1	chr14	49707667	49708792	-	RP11-831F12.2	antisense	HAVANA	NA	NA		ENSG00000258400
FAM160B2	ENSG00000158863	429.001	-0.274808	0.0612741	-4.48489	7.3e-06	2.83e-05	ENSG00000158863.21	chr8	22089159	22104898	+	protein_coding	HAVANA	22089254	22102928	ENSP00000395477.1|ENSP00000403288.3|ENSP00000289921.6	ENSG00000158863	421.364	0.304355	0.0955953	3.18379	0.00145362	0.00820954	ENSG00000158863.21	chr8	22089159	22104898	+	FAM160B2	protein_coding	HAVANA	22089254	22102928	ENSP00000395477.1|ENSP00000403288.3|ENSP00000289921.6	ENSG00000158863
LAMA4	ENSG00000112769	960.342	-0.52183	0.11682	-4.46694	7.93e-06	3.07e-05	ENSG00000112769.18	chr6	112108760	112254939	-	protein_coding	HAVANA	112109440	112254150	ENSP00000230538.7|ENSP00000429488.1|ENSP00000374114.4|ENSP00000416470.2|ENSP00000427837.1|ENSP00000427865.1|ENSP00000357629.4|ENSP00000430336.1|ENSP00000428583.1|ENSP00000412136.2|ENSP00000243219.3|ENSP00000430415.1|ENSP00000357627.4|ENSP00000398226.2|ENSP00000408604.1	ENSG00000112769	887.697	0.811446	0.145422	5.57994	2.41e-08	3.82e-07	ENSG00000112769.18	chr6	112108760	112254939	-	LAMA4	protein_coding	HAVANA	112109440	112254150	ENSP00000230538.7|ENSP00000429488.1|ENSP00000374114.4|ENSP00000416470.2|ENSP00000427837.1|ENSP00000427865.1|ENSP00000357629.4|ENSP00000430336.1|ENSP00000428583.1|ENSP00000412136.2|ENSP00000243219.3|ENSP00000430415.1|ENSP00000357627.4|ENSP00000398226.2|ENSP00000408604.1	ENSG00000112769
RARRES2	ENSG00000106538	303.785	-0.563223	0.126276	-4.46027	8.19e-06	3.16e-05	ENSG00000106538.9	chr7	150338317	150341674	-	protein_coding	HAVANA	150338337	150340609	ENSP00000223271.3|ENSP00000417669.1|ENSP00000418009.1|ENSP00000418483.1	ENSG00000106538	277.968	1.00018	0.189584	5.27565	1.32e-07	1.85e-06	ENSG00000106538.9	chr7	150338317	150341674	-	RARRES2	protein_coding	HAVANA	150338337	150340609	ENSP00000223271.3|ENSP00000417669.1|ENSP00000418009.1|ENSP00000418483.1	ENSG00000106538
TCF7L1	ENSG00000152284	282.741	-0.412251	0.0932194	-4.42237	9.76e-06	3.73e-05	ENSG00000152284.4	chr2	85133410	85310388	+	protein_coding	HAVANA	85133685	85309459	ENSP00000282111.3|ENSP00000388984.1	ENSG00000152284	268.617	0.657446	0.138157	4.75868	1.95e-06	2.24e-05	ENSG00000152284.4	chr2	85133410	85310388	+	TCF7L1	protein_coding	HAVANA	85133685	85309459	ENSP00000282111.3|ENSP00000388984.1	ENSG00000152284
CMIP	ENSG00000153815	804.942	-0.246486	0.0563251	-4.37614	1.21e-05	4.57e-05	ENSG00000153815.16	chr16	81445170	81711762	+	protein_coding	HAVANA|ENSEMBL	81445242	81709796	ENSP00000446100.2|ENSP00000440401.2|ENSP00000481511.1|ENSP00000478272.1|ENSP00000381120.4|ENSP00000478736.1	ENSG00000153815	795.798	0.26422	0.0874643	3.0209	0.00252029	0.0130918	ENSG00000153815.16	chr16	81445170	81711762	+	CMIP	protein_coding	HAVANA|ENSEMBL	81445242	81709796	ENSP00000446100.2|ENSP00000440401.2|ENSP00000481511.1|ENSP00000478272.1|ENSP00000381120.4|ENSP00000478736.1	ENSG00000153815
SDC3	ENSG00000162512	970.851	-0.415503	0.095147	-4.36696	1.26e-05	4.76e-05	ENSG00000162512.15	chr1	30869467	30908761	-	protein_coding	HAVANA	30873214	30908586	ENSP00000338346.7|ENSP00000344468.6	ENSG00000162512	922.519	0.611751	0.137966	4.43408	9.25e-06	9.34e-05	ENSG00000162512.15	chr1	30869467	30908761	-	SDC3	protein_coding	HAVANA	30873214	30908586	ENSP00000338346.7|ENSP00000344468.6	ENSG00000162512
PLSCR1	ENSG00000188313	445.158	-0.442491	0.101759	-4.34843	1.37e-05	5.16e-05	ENSG00000188313.12	chr3	146515180	146544864	-	protein_coding	HAVANA	146516048	146536552	ENSP00000345494.4|ENSP00000419680.1|ENSP00000419228.1|ENSP00000417792.1|ENSP00000417469.1|ENSP00000411675.2|ENSP00000418654.1|ENSP00000417733.1|ENSP00000420006.1|ENSP00000417588.1|ENSP00000418103.1|ENSP00000418550.1|ENSP00000420523.1	ENSG00000188313	420.141	0.540109	0.15677	3.44522	0.000570587	0.00366136	ENSG00000188313.12	chr3	146515180	146544864	-	PLSCR1	protein_coding	HAVANA	146516048	146536552	ENSP00000345494.4|ENSP00000419680.1|ENSP00000419228.1|ENSP00000417792.1|ENSP00000417469.1|ENSP00000411675.2|ENSP00000418654.1|ENSP00000417733.1|ENSP00000420006.1|ENSP00000417588.1|ENSP00000418103.1|ENSP00000418550.1|ENSP00000420523.1	ENSG00000188313
GAB2	ENSG00000033327	578.76	-0.333408	0.0766828	-4.34789	1.37e-05	5.17e-05	ENSG00000033327.12	chr11	78215297	78418348	-	protein_coding	HAVANA	78219275	78417720	ENSP00000343959.2|ENSP00000354952.4|ENSP00000433762.1|ENSP00000431868.1	ENSG00000033327	560.738	0.571369	0.108523	5.26496	1.4e-07	1.95e-06	ENSG00000033327.12	chr11	78215297	78418348	-	GAB2	protein_coding	HAVANA	78219275	78417720	ENSP00000343959.2|ENSP00000354952.4|ENSP00000433762.1|ENSP00000431868.1	ENSG00000033327
CEP295NL	ENSG00000178404	83.8392	-0.358244	0.0825043	-4.34212	1.41e-05	5.29e-05	ENSG00000178404.9	chr17	78870910	78903217	-	protein_coding	HAVANA|ENSEMBL	78870910	78901828	ENSP00000465968.1|ENSP00000312767.2|ENSP00000483863.1	ENSG00000178404	80.4856	0.611148	0.115356	5.29793	1.17e-07	1.66e-06	ENSG00000178404.9	chr17	78870910	78903217	-	CEP295NL	protein_coding	HAVANA|ENSEMBL	78870910	78901828	ENSP00000465968.1|ENSP00000312767.2|ENSP00000483863.1	ENSG00000178404
CLIP2	ENSG00000106665	381.77	-0.335819	0.0775249	-4.33176	1.48e-05	5.54e-05	ENSG00000106665.15	chr7	74289475	74405943	+	protein_coding	HAVANA|ENSEMBL	74317547	74403845	ENSP00000355151.5|ENSP00000223398.6|ENSP00000378500.1|ENSP00000417597.1|ENSP00000419938.1	ENSG00000106665	369.561	0.445491	0.123067	3.61992	0.000294696	0.00206124	ENSG00000106665.15	chr7	74289475	74405943	+	CLIP2	protein_coding	HAVANA|ENSEMBL	74317547	74403845	ENSP00000355151.5|ENSP00000223398.6|ENSP00000378500.1|ENSP00000417597.1|ENSP00000419938.1	ENSG00000106665
CPNE2	ENSG00000140848	220.914	-0.344792	0.0796924	-4.32653	1.51e-05	5.67e-05	ENSG00000140848.16	chr16	57092537	57148367	+	protein_coding	HAVANA	57110743	57147655	ENSP00000290776.8|ENSP00000439018.2|ENSP00000455883.1|ENSP00000456042.1|ENSP00000455443.1|ENSP00000457579.1	ENSG00000140848	212.991	0.291419	0.116143	2.50914	0.0121025	0.0487547	ENSG00000140848.16	chr16	57092537	57148367	+	CPNE2	protein_coding	HAVANA	57110743	57147655	ENSP00000290776.8|ENSP00000439018.2|ENSP00000455883.1|ENSP00000456042.1|ENSP00000455443.1|ENSP00000457579.1	ENSG00000140848
MICU3	ENSG00000155970	136.55	-0.313647	0.0726911	-4.31478	1.6e-05	5.96e-05	ENSG00000155970.11	chr8	17027238	17122644	+	protein_coding	HAVANA	17027280	17118772	ENSP00000321455.5|ENSP00000427765.1|ENSP00000428890.1	ENSG00000155970	132.892	0.350598	0.101733	3.44624	0.000568444	0.00364973	ENSG00000155970.11	chr8	17027238	17122644	+	MICU3	protein_coding	HAVANA	17027280	17118772	ENSP00000321455.5|ENSP00000427765.1|ENSP00000428890.1	ENSG00000155970
MCC	ENSG00000171444	686.368	-0.368865	0.0855518	-4.3116	1.62e-05	6.04e-05	ENSG00000171444.17	chr5	113022099	113488830	-	protein_coding	HAVANA	113027305	113488414	ENSP00000305617.4|ENSP00000421615.2|ENSP00000386227.3|ENSP00000485492.1|ENSP00000485220.1	ENSG00000171444	659.514	0.758337	0.115647	6.55735	5.48e-11	1.28e-09	ENSG00000171444.17	chr5	113022099	113488830	-	MCC	protein_coding	HAVANA	113027305	113488414	ENSP00000305617.4|ENSP00000421615.2|ENSP00000386227.3|ENSP00000485492.1|ENSP00000485220.1	ENSG00000171444
PRKG1	ENSG00000185532	308.339	-0.508891	0.11893	-4.27891	1.88e-05	6.95e-05	ENSG00000185532.15	chr10	50991358	52298350	+	protein_coding	HAVANA|ENSEMBL	50991379	52293897	ENSP00000363097.2|ENSP00000363092.4|ENSP00000363087.3|ENSP00000384200.3	ENSG00000185532	285.69	0.840483	0.160258	5.24456	1.57e-07	2.16e-06	ENSG00000185532.15	chr10	50991358	52298350	+	PRKG1	protein_coding	HAVANA|ENSEMBL	50991379	52293897	ENSP00000363097.2|ENSP00000363092.4|ENSP00000363087.3|ENSP00000384200.3	ENSG00000185532
TNFAIP8L3	ENSG00000183578	55.7568	-0.51063	0.119797	-4.26245	2.02e-05	7.45e-05	ENSG00000183578.5	chr15	51056598	51105276	-	protein_coding	HAVANA	51057884	51105176	ENSP00000328016.5	ENSG00000183578	51.7626	0.632272	0.185844	3.40217	0.000668538	0.00419865	ENSG00000183578.5	chr15	51056598	51105276	-	TNFAIP8L3	protein_coding	HAVANA	51057884	51105176	ENSP00000328016.5	ENSG00000183578
RBMS1P1	ENSG00000225422	35.7248	-0.5172	0.121984	-4.23991	2.24e-05	8.2e-05	ENSG00000225422.4	chr12	66234079	66235234	-	processed_pseudogene	HAVANA	NA	NA		ENSG00000225422	32.9694	0.474437	0.189437	2.50445	0.012264	0.0493201	ENSG00000225422.4	chr12	66234079	66235234	-	RBMS1P1	processed_pseudogene	HAVANA	NA	NA		ENSG00000225422
RP11-177G23.2	ENSG00000272137	11.3994	-0.519875	0.123156	-4.22128	2.43e-05	8.86e-05	ENSG00000272137.1	chr6	79561132	79561602	+	lincRNA	HAVANA	NA	NA		ENSG00000272137	10.6055	0.793105	0.197778	4.01008	6.07e-05	0.00050915	ENSG00000272137.1	chr6	79561132	79561602	+	RP11-177G23.2	lincRNA	HAVANA	NA	NA		ENSG00000272137
LMO4	ENSG00000143013	415.547	-0.284131	0.067778	-4.19209	2.76e-05	0.000100101	ENSG00000143013.12	chr1	87328468	87348923	+	protein_coding	HAVANA	87332016	87344793	ENSP00000359575.4|ENSP00000359573.1	ENSG00000143013	407.383	0.479371	0.102634	4.67068	3e-06	3.33e-05	ENSG00000143013.12	chr1	87328468	87348923	+	LMO4	protein_coding	HAVANA	87332016	87344793	ENSP00000359575.4|ENSP00000359573.1	ENSG00000143013
HIC1	ENSG00000177374	251.252	-0.409458	0.0979039	-4.18224	2.89e-05	0.000104299	ENSG00000177374.12	chr17	2054154	2063241	+	protein_coding	HAVANA|ENSEMBL	2056310	2058832	ENSP00000461476.1|ENSP00000476554.1|ENSP00000460268.1|ENSP00000382742.2|ENSP00000477858.1|ENSP00000467045.1|ENSP00000314080.3	ENSG00000177374	238.899	0.63465	0.134389	4.72249	2.33e-06	2.64e-05	ENSG00000177374.12	chr17	2054154	2063241	+	HIC1	protein_coding	HAVANA|ENSEMBL	2056310	2058832	ENSP00000461476.1|ENSP00000476554.1|ENSP00000460268.1|ENSP00000382742.2|ENSP00000477858.1|ENSP00000467045.1|ENSP00000314080.3	ENSG00000177374
KIFC3	ENSG00000140859	217.81	-0.371807	0.0889663	-4.17919	2.93e-05	0.000105675	ENSG00000140859.15	chr16	57758217	57863053	-	protein_coding	HAVANA	57758544	57862836	ENSP00000454659.1|ENSP00000368976.4|ENSP00000401696.2|ENSP00000457568.1|ENSP00000396399.2|ENSP00000442008.1|ENSP00000438805.2|ENSP00000444012.1|ENSP00000456239.1|ENSP00000458009.1|ENSP00000457232.1|ENSP00000457326.1|ENSP00000454493.1|ENSP00000457948.1|ENSP00000454501.1|ENSP00000457247.1|ENSP00000454403.1|ENSP00000456780.1|ENSP00000454615.1|ENSP00000454632.1|ENSP00000456402.1|ENSP00000455276.1|ENS…	ENSG00000140859	208.877	0.610101	0.131834	4.62779	3.7e-06	4.04e-05	ENSG00000140859.15	chr16	57758217	57863053	-	KIFC3	protein_coding	HAVANA	57758544	57862836	ENSP00000454659.1|ENSP00000368976.4|ENSP00000401696.2|ENSP00000457568.1|ENSP00000396399.2|ENSP00000442008.1|ENSP00000438805.2|ENSP00000444012.1|ENSP00000456239.1|ENSP00000458009.1|ENSP00000457232.1|ENSP00000457326.1|ENSP00000454493.1|ENSP00000457948.1|ENSP00000454501.1|ENSP00000457247.1|ENSP00000454403.1|ENSP00000456780.1|ENSP00000454615.1|ENSP00000454632.1|ENSP00000456402.1|ENSP00000455276.1|ENS…	ENSG00000140859
TMEM55A	ENSG00000155099	93.1974	-0.251195	0.0602131	-4.17177	3.02e-05	0.000108943	ENSG00000155099.7	chr8	90993796	91041064	-	protein_coding	HAVANA|ENSEMBL	90995680	91040749	ENSP00000285419.3|ENSP00000430707.1|ENSP00000429280.1|ENSP00000427974.1|ENSP00000429112.1|ENSP00000486788.1	ENSG00000155099	91.7478	0.246452	0.0948419	2.59856	0.00936165	0.0395464	ENSG00000155099.7	chr8	90993796	91041064	-	TMEM55A	protein_coding	HAVANA|ENSEMBL	90995680	91040749	ENSP00000285419.3|ENSP00000430707.1|ENSP00000429280.1|ENSP00000427974.1|ENSP00000429112.1|ENSP00000486788.1	ENSG00000155099
RBMS3	ENSG00000144642	609.688	-0.43076	0.10336	-4.16759	3.08e-05	0.000110851	ENSG00000144642.20	chr3	29280982	30010391	+	protein_coding	HAVANA	29281682	30003859	ENSP00000395592.1|ENSP00000373277.2|ENSP00000391934.1|ENSP00000273139.9|ENSP00000373276.2|ENSP00000397926.1|ENSP00000400519.1	ENSG00000144642	576.683	0.875169	0.144744	6.04632	1.48e-09	2.85e-08	ENSG00000144642.20	chr3	29280982	30010391	+	RBMS3	protein_coding	HAVANA	29281682	30003859	ENSP00000395592.1|ENSP00000373277.2|ENSP00000391934.1|ENSP00000273139.9|ENSP00000373276.2|ENSP00000397926.1|ENSP00000400519.1	ENSG00000144642
TNXB	ENSG00000168477	988.285	-0.551719	0.132413	-4.16665	3.09e-05	0.000111284	ENSG00000168477.17	chr6	32041154	32115334	-	protein_coding	HAVANA|ENSEMBL	32041352	32098198	ENSP00000364393.3|ENSP00000407685.1|ENSP00000483409.1|ENSP00000480067.1|ENSP00000418248.1|ENSP00000389946.1	ENSG00000168477	906.403	0.499703	0.19118	2.61379	0.00895445	0.0381477	ENSG00000168477.17	chr6	32041154	32115334	-	TNXB	protein_coding	HAVANA|ENSEMBL	32041352	32098198	ENSP00000364393.3|ENSP00000407685.1|ENSP00000483409.1|ENSP00000480067.1|ENSP00000418248.1|ENSP00000389946.1	ENSG00000168477
FAM101B	ENSG00000183688	178.489	-0.372891	0.0903113	-4.12896	3.64e-05	0.00012999	ENSG00000183688.4	chr17	439978	445939	-	protein_coding	HAVANA	443167	445939	ENSP00000331915.4	ENSG00000183688	171.679	0.360531	0.129622	2.7814	0.0054125	0.0251536	ENSG00000183688.4	chr17	439978	445939	-	FAM101B	protein_coding	HAVANA	443167	445939	ENSP00000331915.4	ENSG00000183688
HAAO	ENSG00000162882	82.4251	-0.334363	0.0809959	-4.12814	3.66e-05	0.000130376	ENSG00000162882.14	chr2	42767089	42792593	-	protein_coding	HAVANA	42767440	42792536	ENSP00000294973.6|ENSP00000412601.1	ENSG00000162882	79.6464	0.422635	0.124544	3.39345	0.000690186	0.00431807	ENSG00000162882.14	chr2	42767089	42792593	-	HAAO	protein_coding	HAVANA	42767440	42792536	ENSP00000294973.6|ENSP00000412601.1	ENSG00000162882
PCGF5	ENSG00000180628	623.115	-0.296875	0.0722346	-4.10988	3.96e-05	0.00014053	ENSG00000180628.14	chr10	91163012	91284331	+	protein_coding	HAVANA|ENSEMBL	91222872	91278313	ENSP00000479492.1|ENSP00000445704.1|ENSP00000337500.5	ENSG00000180628	609.348	0.348234	0.104896	3.3198	0.000900811	0.00543394	ENSG00000180628.14	chr10	91163012	91284331	+	PCGF5	protein_coding	HAVANA|ENSEMBL	91222872	91278313	ENSP00000479492.1|ENSP00000445704.1|ENSP00000337500.5	ENSG00000180628
CTD-2036P10.6	ENSG00000274403	31.8371	-0.35321	0.0861555	-4.09968	4.14e-05	0.000146531	ENSG00000274403.1	chr15	42726583	42727211	+	antisense	HAVANA	NA	NA		ENSG00000274403	30.7977	0.342852	0.125495	2.73201	0.00629498	0.028475	ENSG00000274403.1	chr15	42726583	42727211	+	CTD-2036P10.6	antisense	HAVANA	NA	NA		ENSG00000274403
PTGDS	ENSG00000107317	1178.61	-0.698249	0.170665	-4.09134	4.29e-05	0.000151596	ENSG00000107317.11	chr9	136977505	136985435	+	protein_coding	HAVANA	136977579	136980852	ENSP00000392633.1|ENSP00000360687.3|ENSP00000435033.1|ENSP00000397468.2|ENSP00000392692.1	ENSG00000107317	1040.15	0.696551	0.27472	2.53549	0.0112289	0.0459838	ENSG00000107317.11	chr9	136977505	136985435	+	PTGDS	protein_coding	HAVANA	136977579	136980852	ENSP00000392633.1|ENSP00000360687.3|ENSP00000435033.1|ENSP00000397468.2|ENSP00000392692.1	ENSG00000107317
SOX17	ENSG00000164736	32.1776	-0.630581	0.154551	-4.08009	4.5e-05	0.000158657	ENSG00000164736.5	chr8	54457935	54460888	+	protein_coding	HAVANA	54458139	54459992	ENSP00000297316.4	ENSG00000164736	28.812	0.572285	0.206064	2.77721	0.0054827	0.0254319	ENSG00000164736.5	chr8	54457935	54460888	+	SOX17	protein_coding	HAVANA	54458139	54459992	ENSP00000297316.4	ENSG00000164736
TMOD1	ENSG00000136842	118.226	-0.520726	0.128218	-4.06126	4.88e-05	0.000171198	ENSG00000136842.13	chr9	97501180	97601748	+	protein_coding	HAVANA|ENSEMBL	97524189	97599695	ENSP00000378637.2|ENSP00000259365.3|ENSP00000364318.1	ENSG00000136842	109.121	0.794599	0.164848	4.82018	1.43e-06	1.69e-05	ENSG00000136842.13	chr9	97501180	97601748	+	TMOD1	protein_coding	HAVANA|ENSEMBL	97524189	97599695	ENSP00000378637.2|ENSP00000259365.3|ENSP00000364318.1	ENSG00000136842
IRAK3	ENSG00000090376	400.979	-0.414164	0.102506	-4.04041	5.34e-05	0.000186178	ENSG00000090376.8	chr12	66188879	66254622	+	protein_coding	HAVANA	66189300	66248168	ENSP00000261233.4|ENSP00000441321.1|ENSP00000409852.2	ENSG00000090376	381.13	0.737208	0.152918	4.82093	1.43e-06	1.68e-05	ENSG00000090376.8	chr12	66188879	66254622	+	IRAK3	protein_coding	HAVANA	66189300	66248168	ENSP00000261233.4|ENSP00000441321.1|ENSP00000409852.2	ENSG00000090376
SLC29A1	ENSG00000112759	160.192	-0.316365	0.0783442	-4.03815	5.39e-05	0.000187863	ENSG00000112759.16	chr6	44219505	44234151	+	protein_coding	HAVANA|ENSEMBL	44227314	44233525	ENSP00000377427.1|ENSP00000392668.2|ENSP00000360820.3|ENSP00000360805.5|ENSP00000360796.1|ENSP00000377424.1|ENSP00000360789.1|ENSP00000360778.1|ENSP00000360773.1	ENSG00000112759	155.493	0.284227	0.097321	2.92051	0.00349456	0.0173257	ENSG00000112759.16	chr6	44219505	44234151	+	SLC29A1	protein_coding	HAVANA|ENSEMBL	44227314	44233525	ENSP00000377427.1|ENSP00000392668.2|ENSP00000360820.3|ENSP00000360805.5|ENSP00000360796.1|ENSP00000377424.1|ENSP00000360789.1|ENSP00000360778.1|ENSP00000360773.1	ENSG00000112759
MEF2A	ENSG00000068305	815.947	-0.2502	0.0621124	-4.02819	5.62e-05	0.000195555	ENSG00000068305.17	chr15	99565417	99716466	+	protein_coding	HAVANA|ENSEMBL	99633120	99712768	ENSP00000453478.1|ENSP00000346389.5|ENSP00000454120.1|ENSP00000337202.7|ENSP00000453441.1|ENSP00000454023.1|ENSP00000399460.2|ENSP00000453095.1|ENSP00000452989.1	ENSG00000068305	806.421	0.266973	0.0819326	3.25844	0.00112026	0.00656461	ENSG00000068305.17	chr15	99565417	99716466	+	MEF2A	protein_coding	HAVANA|ENSEMBL	99633120	99712768	ENSP00000453478.1|ENSP00000346389.5|ENSP00000454120.1|ENSP00000337202.7|ENSP00000453441.1|ENSP00000454023.1|ENSP00000399460.2|ENSP00000453095.1|ENSP00000452989.1	ENSG00000068305
TCP11L1	ENSG00000176148	239.435	-0.223301	0.0557032	-4.00876	6.1e-05	0.000211264	ENSG00000176148.15	chr11	33039417	33105943	+	protein_coding	HAVANA|ENSEMBL	33043774	33105704	ENSP00000436428.1|ENSP00000335595.4|ENSP00000435667.1|ENSP00000431200.1|ENSP00000473628.1|ENSP00000395070.1|ENSP00000435870.1|ENSP00000433067.1|ENSP00000436471.1	ENSG00000176148	237.965	0.252283	0.0881734	2.86121	0.00422026	0.0203526	ENSG00000176148.15	chr11	33039417	33105943	+	TCP11L1	protein_coding	HAVANA|ENSEMBL	33043774	33105704	ENSP00000436428.1|ENSP00000335595.4|ENSP00000435667.1|ENSP00000431200.1|ENSP00000473628.1|ENSP00000395070.1|ENSP00000435870.1|ENSP00000433067.1|ENSP00000436471.1	ENSG00000176148
PLP2	ENSG00000102007	170.303	-0.383426	0.0962157	-3.98507	6.75e-05	0.000232039	ENSG00000102007.10	chrX	49171926	49175239	+	protein_coding	HAVANA	49172001	49174691	ENSP00000365500.3|ENSP00000365505.5	ENSG00000102007	163.23	0.56519	0.154668	3.6542	0.000257983	0.00183843	ENSG00000102007.10	chrX	49171926	49175239	+	PLP2	protein_coding	HAVANA	49172001	49174691	ENSP00000365500.3|ENSP00000365505.5	ENSG00000102007
CAMK2G	ENSG00000148660	612.439	-0.228401	0.0573754	-3.98081	6.87e-05	0.000235979	ENSG00000148660.20	chr10	73812501	73874591	-	protein_coding	HAVANA|ENSEMBL	73815018	73874461	ENSP00000277853.5|ENSP00000315599.3|ENSP00000378243.3|ENSP00000319060.3|ENSP00000410298.2|ENSP00000393784.1|ENSP00000307082.7|ENSP00000361851.1|ENSP00000405561.1	ENSG00000148660	607.622	0.269859	0.0832688	3.24081	0.00119189	0.00692388	ENSG00000148660.20	chr10	73812501	73874591	-	CAMK2G	protein_coding	HAVANA|ENSEMBL	73815018	73874461	ENSP00000277853.5|ENSP00000315599.3|ENSP00000378243.3|ENSP00000319060.3|ENSP00000410298.2|ENSP00000393784.1|ENSP00000307082.7|ENSP00000361851.1|ENSP00000405561.1	ENSG00000148660
RSPO3	ENSG00000146374	190.672	-0.680642	0.171655	-3.96519	7.33e-05	0.000250952	ENSG00000146374.13	chr6	127118604	127197765	+	protein_coding	HAVANA	127119193	127197506	ENSP00000349131.4|ENSP00000357300.3	ENSG00000146374	168.757	1.07834	0.246162	4.38063	1.18e-05	0.000116598	ENSG00000146374.13	chr6	127118604	127197765	+	RSPO3	protein_coding	HAVANA	127119193	127197506	ENSP00000349131.4|ENSP00000357300.3	ENSG00000146374
RRAD	ENSG00000166592	50.8131	-0.618454	0.157177	-3.93476	8.33e-05	0.000282943	ENSG00000166592.11	chr16	66921679	66925644	-	protein_coding	HAVANA|ENSEMBL	66921750	66925179	ENSP00000388744.1|ENSP00000299759.6|ENSP00000461995.1|ENSP00000462559.1	ENSG00000166592	45.741	0.574614	0.228887	2.51047	0.012057	0.0485932	ENSG00000166592.11	chr16	66921679	66925644	-	RRAD	protein_coding	HAVANA|ENSEMBL	66921750	66925179	ENSP00000388744.1|ENSP00000299759.6|ENSP00000461995.1|ENSP00000462559.1	ENSG00000166592
KLHL5	ENSG00000109790	543.109	-0.345589	0.0881298	-3.92137	8.8e-05	0.000298199	ENSG00000109790.16	chr4	39045039	39126857	+	protein_coding	HAVANA	39062515	39126792	ENSP00000261425.3|ENSP00000423080.2|ENSP00000423897.1|ENSP00000371355.3|ENSP00000261426.5|ENSP00000426949.1|ENSP00000425512.1	ENSG00000109790	524.914	0.545432	0.133832	4.0755	4.59e-05	0.000395708	ENSG00000109790.16	chr4	39045039	39126857	+	KLHL5	protein_coding	HAVANA	39062515	39126792	ENSP00000261425.3|ENSP00000423080.2|ENSP00000423897.1|ENSP00000371355.3|ENSP00000261426.5|ENSP00000426949.1|ENSP00000425512.1	ENSG00000109790
MACF1	ENSG00000127603	11310.1	-0.26331	0.0673432	-3.90998	9.23e-05	0.000311683	ENSG00000127603.23	chr1	39081316	39487177	+	protein_coding	HAVANA	39084219	39485791	ENSP00000434859.1|ENSP00000473615.1|ENSP00000455823.1|ENSP00000362006.3|ENSP00000354573.2|ENSP00000435070.1|ENSP00000455274.1|ENSP00000435892.1|ENSP00000435078.1|ENSP00000437059.1|ENSP00000362016.2|ENSP00000289893.4|ENSP00000431179.2|ENSP00000433104.2|ENSP00000353231.4|ENSP00000391512.1|ENSP00000407776.1|ENSP00000412910.2	ENSG00000127603	11148.1	0.284142	0.0995578	2.85404	0.00431671	0.0207492	ENSG00000127603.23	chr1	39081316	39487177	+	MACF1	protein_coding	HAVANA	39084219	39485791	ENSP00000434859.1|ENSP00000473615.1|ENSP00000455823.1|ENSP00000362006.3|ENSP00000354573.2|ENSP00000435070.1|ENSP00000455274.1|ENSP00000435892.1|ENSP00000435078.1|ENSP00000437059.1|ENSP00000362016.2|ENSP00000289893.4|ENSP00000431179.2|ENSP00000433104.2|ENSP00000353231.4|ENSP00000391512.1|ENSP00000407776.1|ENSP00000412910.2	ENSG00000127603
RNU6-979P	ENSG00000206623	12.5771	-0.57962	0.148341	-3.90735	9.33e-05	0.000314825	ENSG00000206623.1	chr7	28118113	28118219	-	snRNA	ENSEMBL	NA	NA		ENSG00000206623	11.3565	0.691712	0.236155	2.92906	0.00339987	0.0168978	ENSG00000206623.1	chr7	28118113	28118219	-	RNU6-979P	snRNA	ENSEMBL	NA	NA		ENSG00000206623
RP11-539E19.2	ENSG00000235279	14.4058	-0.532557	0.136399	-3.90441	9.45e-05	0.000318439	ENSG00000235279.1	chr10	51302566	51306709	+	sense_intronic	HAVANA	NA	NA		ENSG00000235279	13.2534	0.702821	0.205433	3.42117	0.000623524	0.00395691	ENSG00000235279.1	chr10	51302566	51306709	+	RP11-539E19.2	sense_intronic	HAVANA	NA	NA		ENSG00000235279
OPTN	ENSG00000123240	703.306	-0.305987	0.0795014	-3.84882	0.000118686	0.000394779	ENSG00000123240.16	chr10	13099449	13138308	+	protein_coding	HAVANA	13109123	13136863	ENSP00000263036.3|ENSP00000368040.1|ENSP00000484961.1|ENSP00000368032.2|ENSP00000414747.2|ENSP00000368027.3|ENSP00000368022.3|ENSP00000368021.3|ENSP00000481473.1|ENSP00000400356.1	ENSG00000123240	686.189	0.337824	0.118899	2.84127	0.00449349	0.021482	ENSG00000123240.16	chr10	13099449	13138308	+	OPTN	protein_coding	HAVANA	13109123	13136863	ENSP00000263036.3|ENSP00000368040.1|ENSP00000484961.1|ENSP00000368032.2|ENSP00000414747.2|ENSP00000368027.3|ENSP00000368022.3|ENSP00000368021.3|ENSP00000481473.1|ENSP00000400356.1	ENSG00000123240
GAB1	ENSG00000109458	596.145	-0.292865	0.0767632	-3.81517	0.000136088	0.000449187	ENSG00000109458.8	chr4	143336762	143474568	+	protein_coding	HAVANA	143337189	143469209	ENSP00000262995.4|ENSP00000262994.4|ENSP00000427435.1|ENSP00000426668.1|ENSP00000424554.1|ENSP00000425921.1|ENSP00000420867.1|ENSP00000426297.1	ENSG00000109458	583.245	0.34251	0.105743	3.23907	0.00119921	0.0069576	ENSG00000109458.8	chr4	143336762	143474568	+	GAB1	protein_coding	HAVANA	143337189	143469209	ENSP00000262995.4|ENSP00000262994.4|ENSP00000427435.1|ENSP00000426668.1|ENSP00000424554.1|ENSP00000425921.1|ENSP00000420867.1|ENSP00000426297.1	ENSG00000109458
LIMS2	ENSG00000072163	451.042	-0.453784	0.119333	-3.80267	0.000143144	0.000470863	ENSG00000072163.18	chr2	127638381	127681786	-	protein_coding	HAVANA|ENSEMBL	127639284	127675024	ENSP00000397253.1|ENSP00000386252.1|ENSP00000386345.1|ENSP00000326888.5|ENSP00000386383.1|ENSP00000347240.4|ENSP00000386637.2|ENSP00000387002.1|ENSP00000484949.1|ENSP00000386570.1|ENSP00000443794.2|ENSP00000388611.1|ENSP00000386907.1	ENSG00000072163	424.142	1.1122	0.166763	6.66934	2.57e-11	6.29e-10	ENSG00000072163.18	chr2	127638381	127681786	-	LIMS2	protein_coding	HAVANA|ENSEMBL	127639284	127675024	ENSP00000397253.1|ENSP00000386252.1|ENSP00000386345.1|ENSP00000326888.5|ENSP00000386383.1|ENSP00000347240.4|ENSP00000386637.2|ENSP00000387002.1|ENSP00000484949.1|ENSP00000386570.1|ENSP00000443794.2|ENSP00000388611.1|ENSP00000386907.1	ENSG00000072163
AC010287.1	ENSG00000279816	17.4878	-0.337619	0.0890537	-3.79119	0.000149928	0.000491901	ENSG00000279816.1	chr16	58554337	58554935	+	protein_coding	ENSEMBL	58554413	58554772	ENSP00000485180.1	ENSG00000279816	17.0581	0.363389	0.138846	2.6172	0.00886543	0.0378413	ENSG00000279816.1	chr16	58554337	58554935	+	AC010287.1	protein_coding	ENSEMBL	58554413	58554772	ENSP00000485180.1	ENSG00000279816
PCM1	ENSG00000078674	2914.81	-0.235308	0.0622628	-3.77927	0.000157288	0.000514408	ENSG00000078674.17	chr8	17922840	18029944	+	protein_coding	HAVANA|ENSEMBL	17935611	18027659	ENSP00000327077.8|ENSP00000328332.9|ENSP00000428131.1|ENSP00000428123.1|ENSP00000429941.1|ENSP00000431099.1|ENSP00000430521.1|ENSP00000429054.1	ENSG00000078674	2890.8	0.306256	0.0915008	3.34703	0.000816821	0.0049974	ENSG00000078674.17	chr8	17922840	18029944	+	PCM1	protein_coding	HAVANA|ENSEMBL	17935611	18027659	ENSP00000327077.8|ENSP00000328332.9|ENSP00000428131.1|ENSP00000428123.1|ENSP00000429941.1|ENSP00000431099.1|ENSP00000430521.1|ENSP00000429054.1	ENSG00000078674
RP11-358D17.2	ENSG00000280551	86.238	-0.458461	0.121418	-3.77588	0.000159445	0.000521079	ENSG00000280551.1	chr4	119042024	119043937	+	TEC	HAVANA	NA	NA		ENSG00000280551	80.8993	0.888212	0.163964	5.41711	6.06e-08	9e-07	ENSG00000280551.1	chr4	119042024	119043937	+	RP11-358D17.2	TEC	HAVANA	NA	NA		ENSG00000280551
SYNE1	ENSG00000131018	4015.6	-0.374582	0.0992546	-3.77395	0.000160685	0.000524782	ENSG00000131018.22	chr6	152121684	152637801	-	protein_coding	HAVANA|ENSEMBL	152122439	152628331	ENSP00000356224.5|ENSP00000341887.6|ENSP00000441052.1|ENSP00000356226.4|ENSP00000396024.1|ENSP00000356220.3|ENSP00000346701.4|ENSP00000437411.1|ENSP00000443879.1|ENSP00000390975.2|ENSP00000390858.3|ENSP00000442805.1|ENSP00000356222.4|ENSP00000356217.3|ENSP00000414510.2|ENSP00000438508.1|ENSP00000440193.1|ENSP00000446021.1|ENSP00000441264.1|ENSP00000481873.1	ENSG00000131018	3853.81	0.803335	0.13825	5.81072	6.22e-09	1.09e-07	ENSG00000131018.22	chr6	152121684	152637801	-	SYNE1	protein_coding	HAVANA|ENSEMBL	152122439	152628331	ENSP00000356224.5|ENSP00000341887.6|ENSP00000441052.1|ENSP00000356226.4|ENSP00000396024.1|ENSP00000356220.3|ENSP00000346701.4|ENSP00000437411.1|ENSP00000443879.1|ENSP00000390975.2|ENSP00000390858.3|ENSP00000442805.1|ENSP00000356222.4|ENSP00000356217.3|ENSP00000414510.2|ENSP00000438508.1|ENSP00000440193.1|ENSP00000446021.1|ENSP00000441264.1|ENSP00000481873.1	ENSG00000131018
TGFBR3	ENSG00000069702	797.167	-0.468506	0.124884	-3.75154	0.000175752	0.000571168	ENSG00000069702.10	chr1	91680343	91906335	-	protein_coding	HAVANA|ENSEMBL	91683742	91861531	ENSP00000433477.1|ENSP00000212355.4|ENSP00000359426.2|ENSP00000436127.1|ENSP00000434994.1|ENSP00000432638.1|ENSP00000395975.2	ENSG00000069702	747.211	1.19353	0.181425	6.57865	4.75e-11	1.13e-09	ENSG00000069702.10	chr1	91680343	91906335	-	TGFBR3	protein_coding	HAVANA|ENSEMBL	91683742	91861531	ENSP00000433477.1|ENSP00000212355.4|ENSP00000359426.2|ENSP00000436127.1|ENSP00000434994.1|ENSP00000432638.1|ENSP00000395975.2	ENSG00000069702
RNU6-674P	ENSG00000200701	9.9137	-0.609168	0.162505	-3.74862	0.000177813	0.000577485	ENSG00000200701.1	chr2	85204926	85205032	+	snRNA	ENSEMBL	NA	NA		ENSG00000200701	9.067	0.987778	0.255991	3.85865	0.000114017	0.000894388	ENSG00000200701.1	chr2	85204926	85205032	+	RNU6-674P	snRNA	ENSEMBL	NA	NA		ENSG00000200701
TTC28-AS1	ENSG00000235954	184.118	-0.177885	0.0475599	-3.74024	0.000183846	0.000595636	ENSG00000235954.6	chr22	27919376	28008581	+	processed_transcript	HAVANA|ENSEMBL	NA	NA		ENSG00000235954	184.616	0.181144	0.0715633	2.53124	0.011366	0.0463996	ENSG00000235954.6	chr22	27919376	28008581	+	TTC28-AS1	processed_transcript	HAVANA|ENSEMBL	NA	NA		ENSG00000235954
CCSER2	ENSG00000107771	765.741	-0.222723	0.0599829	-3.71311	0.000204727	0.000658138	ENSG00000107771.15	chr10	84328586	84518521	+	protein_coding	HAVANA|ENSEMBL	84371053	84514264	ENSP00000353068.4|ENSP00000361160.2|ENSP00000224756.8|ENSP00000439944.1	ENSG00000107771	761.548	0.312111	0.086468	3.60956	0.000306717	0.0021342	ENSG00000107771.15	chr10	84328586	84518521	+	CCSER2	protein_coding	HAVANA|ENSEMBL	84371053	84514264	ENSP00000353068.4|ENSP00000361160.2|ENSP00000224756.8|ENSP00000439944.1	ENSG00000107771
PGM5P4	ENSG00000225398	6.01863	-0.624224	0.169084	-3.6918	0.00022267	0.00071225	ENSG00000225398.3	chr2	113541937	113563298	+	unprocessed_pseudogene	HAVANA	NA	NA		ENSG00000225398	5.43549	1.04548	0.278547	3.75335	0.00017449	0.00130299	ENSG00000225398.3	chr2	113541937	113563298	+	PGM5P4	unprocessed_pseudogene	HAVANA	NA	NA		ENSG00000225398
OGFRL1	ENSG00000119900	619.059	-0.348395	0.0947151	-3.67835	0.000234748	0.000747967	ENSG00000119900.7	chr6	71288803	71308950	+	protein_coding	HAVANA	71288937	71302046	ENSP00000359464.3	ENSG00000119900	597.799	0.369842	0.141824	2.60775	0.00911394	0.0387006	ENSG00000119900.7	chr6	71288803	71308950	+	OGFRL1	protein_coding	HAVANA	71288937	71302046	ENSP00000359464.3	ENSG00000119900
ETS2	ENSG00000157557	850.888	-0.43801	0.119296	-3.67164	0.000241004	0.000766632	ENSG00000157557.11	chr21	38805307	38824955	+	protein_coding	HAVANA	38810035	38822886	ENSP00000353344.3|ENSP00000354194.3|ENSP00000401273.1|ENSP00000411086.1	ENSG00000157557	804.175	0.990749	0.177042	5.59613	2.19e-08	3.49e-07	ENSG00000157557.11	chr21	38805307	38824955	+	ETS2	protein_coding	HAVANA	38810035	38822886	ENSP00000353344.3|ENSP00000354194.3|ENSP00000401273.1|ENSP00000411086.1	ENSG00000157557
CAV1	ENSG00000105974	481.631	-0.549303	0.149674	-3.66999	0.000242562	0.000771202	ENSG00000105974.11	chr7	116524785	116561184	+	protein_coding	HAVANA|ENSEMBL	116525063	116559284	ENSP00000339191.2|ENSP00000377113.1|ENSP00000409541.1|ENSP00000479447.1|ENSP00000384348.1|ENSP00000389033.1|ENSP00000377111.1|ENSP00000377110.1	ENSG00000105974	441.986	1.26768	0.18754	6.7595	1.38e-11	3.52e-10	ENSG00000105974.11	chr7	116524785	116561184	+	CAV1	protein_coding	HAVANA|ENSEMBL	116525063	116559284	ENSP00000339191.2|ENSP00000377113.1|ENSP00000409541.1|ENSP00000479447.1|ENSP00000384348.1|ENSP00000389033.1|ENSP00000377111.1|ENSP00000377110.1	ENSG00000105974
SLC5A9	ENSG00000117834	155.732	-0.330907	0.0909675	-3.63764	0.000275148	0.000867393	ENSG00000117834.12	chr1	48222685	48248644	+	protein_coding	HAVANA	48222737	48247540	ENSP00000404982.1|ENSP00000431900.1|ENSP00000401730.2|ENSP00000236495.5|ENSP00000399991.2|ENSP00000431196.1	ENSG00000117834	150.756	0.44096	0.132068	3.33889	0.000841139	0.00512192	ENSG00000117834.12	chr1	48222685	48248644	+	SLC5A9	protein_coding	HAVANA	48222737	48247540	ENSP00000404982.1|ENSP00000431900.1|ENSP00000401730.2|ENSP00000236495.5|ENSP00000399991.2|ENSP00000431196.1	ENSG00000117834
ATOH8	ENSG00000168874	175.578	-0.429105	0.118011	-3.63616	0.000276732	0.000871767	ENSG00000168874.12	chr2	85751344	85788066	+	protein_coding	HAVANA	85754190	85786887	ENSP00000304676.3	ENSG00000168874	165.938	0.837478	0.167735	4.99286	5.95e-07	7.49e-06	ENSG00000168874.12	chr2	85751344	85788066	+	ATOH8	protein_coding	HAVANA	85754190	85786887	ENSP00000304676.3	ENSG00000168874
RP11-9H20.2	ENSG00000280365	46.0366	-0.325897	0.089657	-3.63493	0.000278057	0.00087557	ENSG00000280365.1	chr18	44732575	44733315	+	TEC	HAVANA	NA	NA		ENSG00000280365	44.7199	0.558994	0.133084	4.2003	2.67e-05	0.000242572	ENSG00000280365.1	chr18	44732575	44733315	+	RP11-9H20.2	TEC	HAVANA	NA	NA		ENSG00000280365
COL8A2	ENSG00000171812	97.2413	-0.325877	0.0898796	-3.62571	0.000288168	0.000904954	ENSG00000171812.11	chr1	36095236	36125220	-	protein_coding	HAVANA|ENSEMBL	36097572	36100242	ENSP00000380901.1|ENSP00000305913.4|ENSP00000436433.1|ENSP00000484406.1	ENSG00000171812	94.247	0.559687	0.143923	3.88879	0.000100746	0.000802076	ENSG00000171812.11	chr1	36095236	36125220	-	COL8A2	protein_coding	HAVANA|ENSEMBL	36097572	36100242	ENSP00000380901.1|ENSP00000305913.4|ENSP00000436433.1|ENSP00000484406.1	ENSG00000171812
EID3	ENSG00000255150	65.538	-0.26231	0.0723498	-3.62558	0.000288311	0.000905281	ENSG00000255150.1	chr12	104303739	104305202	+	protein_coding	HAVANA	104303935	104304933	ENSP00000435619.1	ENSG00000255150	64.2614	0.356191	0.106378	3.34834	0.000812981	0.00497734	ENSG00000255150.1	chr12	104303739	104305202	+	EID3	protein_coding	HAVANA	104303935	104304933	ENSP00000435619.1	ENSG00000255150
PROS1	ENSG00000184500	298.728	-0.357526	0.0986595	-3.62384	0.000290265	0.000911094	ENSG00000184500.14	chr3	93873033	93974066	-	protein_coding	HAVANA	93874248	93973749	ENSP00000377783.3|ENSP00000385794.1|ENSP00000330021.6|ENSP00000419616.1	ENSG00000184500	287.855	0.452977	0.157165	2.88217	0.00394948	0.0192366	ENSG00000184500.14	chr3	93873033	93974066	-	PROS1	protein_coding	HAVANA	93874248	93973749	ENSP00000377783.3|ENSP00000385794.1|ENSP00000330021.6|ENSP00000419616.1	ENSG00000184500
RP11-95I19.2	ENSG00000241991	7.09245	-0.523444	0.144522	-3.62191	0.000292439	0.0009174	ENSG00000241991.1	chr5	62561859	62562216	-	processed_pseudogene	HAVANA	NA	NA		ENSG00000241991	6.46734	0.652798	0.230079	2.83728	0.00455003	0.0217011	ENSG00000241991.1	chr5	62561859	62562216	-	RP11-95I19.2	processed_pseudogene	HAVANA	NA	NA		ENSG00000241991
PLK2	ENSG00000145632	183.965	-0.335456	0.0927534	-3.61664	0.00029845	0.000934733	ENSG00000145632.14	chr5	58453982	58460260	-	protein_coding	HAVANA|ENSEMBL	58454586	58459959	ENSP00000274289.3|ENSP00000478685.1	ENSG00000145632	178.114	0.424398	0.127718	3.32292	0.000890806	0.00537948	ENSG00000145632.14	chr5	58453982	58460260	-	PLK2	protein_coding	HAVANA|ENSEMBL	58454586	58459959	ENSP00000274289.3|ENSP00000478685.1	ENSG00000145632
HCG11	ENSG00000228223	122.089	-0.328834	0.0910594	-3.6112	0.000304781	0.000953347	ENSG00000228223.2	chr6	26523450	26526579	+	lincRNA	HAVANA	NA	NA		ENSG00000228223	118.41	0.490529	0.142785	3.43543	0.000591614	0.00377729	ENSG00000228223.2	chr6	26523450	26526579	+	HCG11	lincRNA	HAVANA	NA	NA		ENSG00000228223
RP11-139E19.3	ENSG00000278351	9.7689	-0.58704	0.162712	-3.60785	0.000308744	0.000965063	ENSG00000278351.1	chr12	45256473	45256726	+	sense_intronic	HAVANA	NA	NA		ENSG00000278351	8.80369	0.898229	0.261218	3.43862	0.000584694	0.00373936	ENSG00000278351.1	chr12	45256473	45256726	+	RP11-139E19.3	sense_intronic	HAVANA	NA	NA		ENSG00000278351
TNKS	ENSG00000173273	817.372	-0.179923	0.0499554	-3.60167	0.000316175	0.000986827	ENSG00000173273.15	chr8	9555914	9782346	+	protein_coding	HAVANA	9555940	9776733	ENSP00000428299.1|ENSP00000311579.6|ENSP00000430920.1|ENSP00000429890.1|ENSP00000431098.1|ENSP00000428185.1	ENSG00000173273	820.668	0.26014	0.0740781	3.5117	0.000445257	0.00295696	ENSG00000173273.15	chr8	9555914	9782346	+	TNKS	protein_coding	HAVANA	9555940	9776733	ENSP00000428299.1|ENSP00000311579.6|ENSP00000430920.1|ENSP00000429890.1|ENSP00000431098.1|ENSP00000428185.1	ENSG00000173273
ATXN1L	ENSG00000224470	548.773	-0.185133	0.0514361	-3.59928	0.000319099	0.000995253	ENSG00000224470.7	chr16	71845991	71885268	+	protein_coding	HAVANA	71849741	71851807	ENSP00000415822.2	ENSG00000224470	550.416	0.201925	0.0768841	2.62636	0.00863038	0.0370199	ENSG00000224470.7	chr16	71845991	71885268	+	ATXN1L	protein_coding	HAVANA	71849741	71851807	ENSP00000415822.2	ENSG00000224470
RCN3	ENSG00000142552	147.434	-0.325975	0.0908065	-3.58978	0.000330963	0.00102993	ENSG00000142552.7	chr19	49527618	49546962	+	protein_coding	HAVANA	49528473	49546862	ENSP00000270645.2|ENSP00000469727.1|ENSP00000470540.1|ENSP00000470771.1	ENSG00000142552	143.085	0.588696	0.139012	4.23485	2.29e-05	0.000211288	ENSG00000142552.7	chr19	49527618	49546962	+	RCN3	protein_coding	HAVANA	49528473	49546862	ENSP00000270645.2|ENSP00000469727.1|ENSP00000470540.1|ENSP00000470771.1	ENSG00000142552
AGO3	ENSG00000126070	1148.43	-0.186508	0.0523965	-3.55956	0.000371482	0.00114844	ENSG00000126070.19	chr1	35930718	36072500	+	protein_coding	HAVANA|ENSEMBL	35931427	36055742	ENSP00000317425.5|ENSP00000362287.3|ENSP00000380928.2|ENSP00000489286.1|ENSP00000246314.6	ENSG00000126070	1151.2	0.215894	0.0756685	2.85316	0.00432869	0.0207932	ENSG00000126070.19	chr1	35930718	36072500	+	AGO3	protein_coding	HAVANA|ENSEMBL	35931427	36055742	ENSP00000317425.5|ENSP00000362287.3|ENSP00000380928.2|ENSP00000489286.1|ENSP00000246314.6	ENSG00000126070
MBD5	ENSG00000204406	547.116	-0.177591	0.0500572	-3.54776	0.00038852	0.00119744	ENSG00000204406.11	chr2	148021011	148516971	+	protein_coding	HAVANA	148458759	148512938	ENSP00000386049.1|ENSP00000486370.1|ENSP00000487089.1|ENSP00000384672.1|ENSP00000393168.1|ENSP00000486209.1|ENSP00000485889.1	ENSG00000204406	549.409	0.225858	0.0779086	2.89901	0.0037434	0.0183723	ENSG00000204406.11	chr2	148021011	148516971	+	MBD5	protein_coding	HAVANA	148458759	148512938	ENSP00000386049.1|ENSP00000486370.1|ENSP00000487089.1|ENSP00000384672.1|ENSP00000393168.1|ENSP00000486209.1|ENSP00000485889.1	ENSG00000204406
PHLDB2	ENSG00000144824	1065.83	-0.348379	0.0982392	-3.54623	0.000390783	0.00120399	ENSG00000144824.19	chr3	111732497	111976517	+	protein_coding	HAVANA|ENSEMBL	111845869	111974560	ENSP00000377500.3|ENSP00000405292.1|ENSP00000405405.2|ENSP00000418296.1|ENSP00000417497.1|ENSP00000418198.1|ENSP00000377502.3|ENSP00000418319.1|ENSP00000420303.1	ENSG00000144824	1029.35	0.451202	0.150411	2.99979	0.00270167	0.0139052	ENSG00000144824.19	chr3	111732497	111976517	+	PHLDB2	protein_coding	HAVANA|ENSEMBL	111845869	111974560	ENSP00000377500.3|ENSP00000405292.1|ENSP00000405405.2|ENSP00000418296.1|ENSP00000417497.1|ENSP00000418198.1|ENSP00000377502.3|ENSP00000418319.1|ENSP00000420303.1	ENSG00000144824
DNAJB4	ENSG00000162616	314.026	-0.388656	0.109608	-3.54586	0.000391328	0.00120534	ENSG00000162616.8	chr1	77979175	78017964	+	protein_coding	HAVANA	78005111	78016244	ENSP00000399494.1|ENSP00000359799.5	ENSG00000162616	300.115	0.858439	0.143558	5.97973	2.24e-09	4.18e-08	ENSG00000162616.8	chr1	77979175	78017964	+	DNAJB4	protein_coding	HAVANA	78005111	78016244	ENSP00000399494.1|ENSP00000359799.5	ENSG00000162616
RP11-444D3.1	ENSG00000255864	54.5728	-0.383836	0.108359	-3.54228	0.000396691	0.0012205	ENSG00000255864.5	chr12	24213256	24562590	-	lincRNA	HAVANA	NA	NA		ENSG00000255864	51.8119	0.463526	0.133163	3.48089	0.00049976	0.0032675	ENSG00000255864.5	chr12	24213256	24562590	-	RP11-444D3.1	lincRNA	HAVANA	NA	NA		ENSG00000255864
SBSPON	ENSG00000164764	155.164	-0.504218	0.142675	-3.53403	0.000409274	0.00125676	ENSG00000164764.10	chr8	73064540	73124088	-	protein_coding	HAVANA	73067344	73093067	ENSP00000297354.6	ENSG00000164764	143.955	0.831245	0.190967	4.35282	1.34e-05	0.000131169	ENSG00000164764.10	chr8	73064540	73124088	-	SBSPON	protein_coding	HAVANA	73067344	73093067	ENSP00000297354.6	ENSG00000164764
EIF1B	ENSG00000114784	142.581	-0.199314	0.0564979	-3.52781	0.000419011	0.00128506	ENSG00000114784.3	chr3	40309684	40312424	+	protein_coding	HAVANA	40309942	40312011	ENSP00000232905.3	ENSG00000114784	142.676	0.211551	0.0824724	2.56511	0.0103143	0.0428003	ENSG00000114784.3	chr3	40309684	40312424	+	EIF1B	protein_coding	HAVANA	40309942	40312011	ENSP00000232905.3	ENSG00000114784
ACTB	ENSG00000075624	17370.9	-0.317959	0.0906897	-3.50601	0.000454876	0.0013871	ENSG00000075624.13	chr7	5527151	5563784	-	protein_coding	HAVANA	5527751	5529808	ENSP00000349960.4|ENSP00000409264.1|ENSP00000407473.1|ENSP00000393951.1|ENSP00000399487.1|ENSP00000401032.1	ENSG00000075624	16908.6	0.384827	0.135463	2.84082	0.00449974	0.0215076	ENSG00000075624.13	chr7	5527151	5563784	-	ACTB	protein_coding	HAVANA	5527751	5529808	ENSP00000349960.4|ENSP00000409264.1|ENSP00000407473.1|ENSP00000393951.1|ENSP00000399487.1|ENSP00000401032.1	ENSG00000075624
C1RL	ENSG00000139178	397.773	-0.278961	0.0807439	-3.45488	0.000550528	0.001659	ENSG00000139178.10	chr12	7089587	7109273	-	protein_coding	HAVANA	7093809	7109180	ENSP00000444157.1|ENSP00000438286.1|ENSP00000266542.4|ENSP00000441885.1|ENSP00000439180.1|ENSP00000437398.1|ENSP00000438951.1|ENSP00000437569.1|ENSP00000442611.1	ENSG00000139178	390.603	0.323456	0.128858	2.51016	0.0120675	0.0486269	ENSG00000139178.10	chr12	7089587	7109273	-	C1RL	protein_coding	HAVANA	7093809	7109180	ENSP00000444157.1|ENSP00000438286.1|ENSP00000266542.4|ENSP00000441885.1|ENSP00000439180.1|ENSP00000437398.1|ENSP00000438951.1|ENSP00000437569.1|ENSP00000442611.1	ENSG00000139178
NTN1	ENSG00000065320	112.891	-0.448552	0.129922	-3.45246	0.000555492	0.00167293	ENSG00000065320.8	chr17	9021542	9244000	+	protein_coding	HAVANA	9022374	9239965	ENSP00000173229.2|ENSP00000389375.2	ENSG00000065320	106.071	0.746986	0.172777	4.32341	1.54e-05	0.000148048	ENSG00000065320.8	chr17	9021542	9244000	+	NTN1	protein_coding	HAVANA	9022374	9239965	ENSP00000173229.2|ENSP00000389375.2	ENSG00000065320
NYNRIN	ENSG00000205978	278.064	-0.395801	0.114687	-3.45114	0.000558228	0.0016806	ENSG00000205978.5	chr14	24398786	24419288	+	protein_coding	HAVANA	24399247	24417443	ENSP00000371994.3	ENSG00000205978	265.27	0.923016	0.174493	5.2897	1.23e-07	1.72e-06	ENSG00000205978.5	chr14	24398786	24419288	+	NYNRIN	protein_coding	HAVANA	24399247	24417443	ENSP00000371994.3	ENSG00000205978
RP11-530C5.4	ENSG00000277130	29.772	-0.340042	0.098786	-3.44221	0.00057698	0.00173353	ENSG00000277130.1	chr12	79818784	79819465	-	sense_intronic	HAVANA	NA	NA		ENSG00000277130	28.7604	0.430813	0.137708	3.12846	0.00175725	0.00964515	ENSG00000277130.1	chr12	79818784	79819465	-	RP11-530C5.4	sense_intronic	HAVANA	NA	NA		ENSG00000277130
GNAL	ENSG00000141404	191.295	-0.323555	0.094407	-3.42724	0.000609761	0.00182471	ENSG00000141404.15	chr18	11688956	11885685	+	protein_coding	HAVANA	11689564	11881132	ENSP00000334051.5|ENSP00000439023.1|ENSP00000269162.4|ENSP00000408489.2|ENSP00000467345.1|ENSP00000467709.1|ENSP00000473600.1|ENSP00000466709.1	ENSG00000141404	185.794	0.749529	0.137474	5.45217	4.98e-08	7.49e-07	ENSG00000141404.15	chr18	11688956	11885685	+	GNAL	protein_coding	HAVANA	11689564	11881132	ENSP00000334051.5|ENSP00000439023.1|ENSP00000269162.4|ENSP00000408489.2|ENSP00000467345.1|ENSP00000467709.1|ENSP00000473600.1|ENSP00000466709.1	ENSG00000141404
ZNF423	ENSG00000102935	283.556	-0.341395	0.100161	-3.40848	0.000653262	0.00194634	ENSG00000102935.11	chr16	49487524	49857919	-	protein_coding	HAVANA|ENSEMBL	49491278	49822685	ENSP00000455426.1|ENSP00000455588.2|ENSP00000457928.1|ENSP00000262383.2|ENSP00000442321.1|ENSP00000455061.1|ENSP00000457664.1|ENSP00000479288.1	ENSG00000102935	274.09	0.927094	0.142185	6.52034	7.01e-11	1.63e-09	ENSG00000102935.11	chr16	49487524	49857919	-	ZNF423	protein_coding	HAVANA|ENSEMBL	49491278	49822685	ENSP00000455426.1|ENSP00000455588.2|ENSP00000457928.1|ENSP00000262383.2|ENSP00000442321.1|ENSP00000455061.1|ENSP00000457664.1|ENSP00000479288.1	ENSG00000102935
ID2	ENSG00000115738	218.703	-0.331482	0.0976723	-3.39382	0.000689254	0.00204477	ENSG00000115738.9	chr2	8678845	8684453	+	protein_coding	HAVANA|ENSEMBL	8682166	8682896	ENSP00000234091.4|ENSP00000379585.1|ENSP00000385465.2	ENSG00000115738	212.086	0.569473	0.143831	3.95932	7.52e-05	0.000615659	ENSG00000115738.9	chr2	8678845	8684453	+	ID2	protein_coding	HAVANA|ENSEMBL	8682166	8682896	ENSP00000234091.4|ENSP00000379585.1|ENSP00000385465.2	ENSG00000115738
RP11-131H24.4	ENSG00000258987	19.5461	-0.438519	0.129426	-3.38819	0.000703545	0.00208312	ENSG00000258987.1	chr14	93939555	93944129	+	antisense	HAVANA	NA	NA		ENSG00000258987	18.4348	0.655073	0.208244	3.14571	0.00165686	0.00917833	ENSG00000258987.1	chr14	93939555	93944129	+	RP11-131H24.4	antisense	HAVANA	NA	NA		ENSG00000258987
RP11-177G23.1	ENSG00000279659	36.4722	-0.327006	0.0969381	-3.37335	0.000742599	0.0021907	ENSG00000279659.1	chr6	79573877	79575530	+	TEC	HAVANA	NA	NA		ENSG00000279659	35.1938	0.675258	0.145439	4.6429	3.44e-06	3.78e-05	ENSG00000279659.1	chr6	79573877	79575530	+	RP11-177G23.1	TEC	HAVANA	NA	NA		ENSG00000279659
ITPR1	ENSG00000150995	2164.39	-0.377572	0.112086	-3.36859	0.000755544	0.00222696	ENSG00000150995.18	chr3	4493348	4847840	+	protein_coding	HAVANA|ENSEMBL	4516492	4846222	ENSP00000306253.8|ENSP00000346595.7|ENSP00000440564.1|ENSP00000349597.4|ENSP00000397885.2|ENSP00000401671.2	ENSG00000150995	2075.69	0.495302	0.179532	2.75885	0.00580052	0.0266493	ENSG00000150995.18	chr3	4493348	4847840	+	ITPR1	protein_coding	HAVANA|ENSEMBL	4516492	4846222	ENSP00000306253.8|ENSP00000346595.7|ENSP00000440564.1|ENSP00000349597.4|ENSP00000397885.2|ENSP00000401671.2	ENSG00000150995
CTSB	ENSG00000164733	2918.55	-0.320107	0.0954743	-3.35281	0.000799967	0.00234992	ENSG00000164733.20	chr8	11842524	11869448	-	protein_coding	HAVANA	11845128	11853454	ENSP00000473301.1|ENSP00000345672.5|ENSP00000435105.1|ENSP00000433215.1|ENSP00000409917.2|ENSP00000436456.1|ENSP00000342070.3|ENSP00000432244.1|ENSP00000434217.1|ENSP00000436159.1|ENSP00000433995.1|ENSP00000435074.1|ENSP00000436627.1|ENSP00000434725.1|ENSP00000436122.1|ENSP00000431518.1|ENSP00000435650.1|ENSP00000436074.1|ENSP00000435886.1|ENSP00000431143.1|ENSP00000435260.1|ENSP00000433379.2|ENS…	ENSG00000164733	2839.79	0.606003	0.137085	4.42065	9.84e-06	9.85e-05	ENSG00000164733.20	chr8	11842524	11869448	-	CTSB	protein_coding	HAVANA	11845128	11853454	ENSP00000473301.1|ENSP00000345672.5|ENSP00000435105.1|ENSP00000433215.1|ENSP00000409917.2|ENSP00000436456.1|ENSP00000342070.3|ENSP00000432244.1|ENSP00000434217.1|ENSP00000436159.1|ENSP00000433995.1|ENSP00000435074.1|ENSP00000436627.1|ENSP00000434725.1|ENSP00000436122.1|ENSP00000431518.1|ENSP00000435650.1|ENSP00000436074.1|ENSP00000435886.1|ENSP00000431143.1|ENSP00000435260.1|ENSP00000433379.2|ENS…	ENSG00000164733
CRIM1	ENSG00000150938	1205.35	-0.295435	0.0882423	-3.34799	0.000813986	0.00238793	ENSG00000150938.9	chr2	36355926	36551135	+	protein_coding	HAVANA	36356293	36548698	ENSP00000280527.2|ENSP00000407636.1|ENSP00000415706.1|ENSP00000403120.1	ENSG00000150938	1178.72	0.683814	0.111222	6.1482	7.84e-10	1.57e-08	ENSG00000150938.9	chr2	36355926	36551135	+	CRIM1	protein_coding	HAVANA	36356293	36548698	ENSP00000280527.2|ENSP00000407636.1|ENSP00000415706.1|ENSP00000403120.1	ENSG00000150938
RP11-114F10.3	ENSG00000257438	32.7637	-0.376496	0.112821	-3.33711	0.000846535	0.00247457	ENSG00000257438.1	chr12	106103163	106106165	+	antisense	HAVANA	NA	NA		ENSG00000257438	31.376	0.785665	0.148553	5.28877	1.23e-07	1.73e-06	ENSG00000257438.1	chr12	106103163	106106165	+	RP11-114F10.3	antisense	HAVANA	NA	NA		ENSG00000257438
MBNL2	ENSG00000139793	717.824	-0.330988	0.10018	-3.30394	0.000953365	0.0027655	ENSG00000139793.18	chr13	97221434	97394120	+	protein_coding	HAVANA|ENSEMBL	97276236	97391446	ENSP00000380726.1|ENSP00000344214.4|ENSP00000365861.3|ENSP00000432422.1|ENSP00000267287.7|ENSP00000404202.1	ENSG00000139793	696.29	0.806448	0.145802	5.5311	3.18e-08	4.95e-07	ENSG00000139793.18	chr13	97221434	97394120	+	MBNL2	protein_coding	HAVANA|ENSEMBL	97276236	97391446	ENSP00000380726.1|ENSP00000344214.4|ENSP00000365861.3|ENSP00000432422.1|ENSP00000267287.7|ENSP00000404202.1	ENSG00000139793
STARD8	ENSG00000130052	191.286	-0.412253	0.125024	-3.2974	0.000975827	0.00282473	ENSG00000130052.13	chrX	68647666	68725842	+	protein_coding	HAVANA|ENSEMBL	68647883	68724419	ENSP00000252336.6|ENSP00000428031.1|ENSP00000363727.3|ENSP00000363725.3	ENSG00000130052	181.791	0.998431	0.173197	5.76471	8.18e-09	1.4e-07	ENSG00000130052.13	chrX	68647666	68725842	+	STARD8	protein_coding	HAVANA|ENSEMBL	68647883	68724419	ENSP00000252336.6|ENSP00000428031.1|ENSP00000363727.3|ENSP00000363725.3	ENSG00000130052
RP11-88I18.2	ENSG00000233178	170.311	-0.431459	0.131233	-3.28773	0.00100999	0.00291714	ENSG00000233178.7	chr9	68393881	68406500	-	antisense	HAVANA	NA	NA		ENSG00000233178	160.922	1.26588	0.182083	6.95221	3.6e-12	9.86e-11	ENSG00000233178.7	chr9	68393881	68406500	-	RP11-88I18.2	antisense	HAVANA	NA	NA		ENSG00000233178
RP11-127L20.3	ENSG00000228261	39.2437	-0.354813	0.107925	-3.2876	0.00101047	0.00291813	ENSG00000228261.1	chr10	104323369	104327004	+	lincRNA	HAVANA	NA	NA		ENSG00000228261	37.8743	0.441773	0.166176	2.65846	0.00784977	0.0341722	ENSG00000228261.1	chr10	104323369	104327004	+	RP11-127L20.3	lincRNA	HAVANA	NA	NA		ENSG00000228261
SLC2A3	ENSG00000059804	739.494	-0.473079	0.144242	-3.27977	0.00103893	0.00299643	ENSG00000059804.15	chr12	7919230	7936275	-	protein_coding	HAVANA	7921416	7936034	ENSP00000075120.7|ENSP00000440750.1|ENSP00000441496.1	ENSG00000059804	692.04	0.842429	0.205616	4.09711	4.18e-05	0.000364365	ENSG00000059804.15	chr12	7919230	7936275	-	SLC2A3	protein_coding	HAVANA	7921416	7936034	ENSP00000075120.7|ENSP00000440750.1|ENSP00000441496.1	ENSG00000059804
SNED1	ENSG00000162804	537.3	-0.220344	0.0672424	-3.27686	0.00104969	0.00302509	ENSG00000162804.13	chr2	240998838	241095568	+	protein_coding	HAVANA|ENSEMBL	240998838	241088398	ENSP00000384871.1|ENSP00000386007.3|ENSP00000308893.8|ENSP00000384789.2|ENSP00000401865.1|ENSP00000394324.1|ENSP00000342992.7	ENSG00000162804	534.622	0.311228	0.0993356	3.1331	0.00172971	0.00951643	ENSG00000162804.13	chr2	240998838	241095568	+	SNED1	protein_coding	HAVANA|ENSEMBL	240998838	241088398	ENSP00000384871.1|ENSP00000386007.3|ENSP00000308893.8|ENSP00000384789.2|ENSP00000401865.1|ENSP00000394324.1|ENSP00000342992.7	ENSG00000162804
TCF7L1-IT1	ENSG00000231134	23.8681	-0.410835	0.125461	-3.27461	0.00105807	0.00304707	ENSG00000231134.1	chr2	85186409	85187253	+	sense_intronic	HAVANA	NA	NA		ENSG00000231134	22.8118	0.727523	0.194875	3.73328	0.000189001	0.00139884	ENSG00000231134.1	chr2	85186409	85187253	+	TCF7L1-IT1	sense_intronic	HAVANA	NA	NA		ENSG00000231134
AP000857.2	ENSG00000255396	9.66441	-0.418357	0.128075	-3.2665	0.00108884	0.00312897	ENSG00000255396.2	chr11	84997226	84997768	-	processed_pseudogene	HAVANA	NA	NA		ENSG00000255396	9.21445	0.631567	0.194797	3.24218	0.00118621	0.0068972	ENSG00000255396.2	chr11	84997226	84997768	-	AP000857.2	processed_pseudogene	HAVANA	NA	NA		ENSG00000255396
P2RX1	ENSG00000108405	115.916	-0.475528	0.146724	-3.24098	0.00119119	0.00339971	ENSG00000108405.3	chr17	3896592	3916500	-	protein_coding	HAVANA	3897817	3916225	ENSP00000225538.3|ENSP00000460449.1	ENSG00000108405	108.289	0.659677	0.230426	2.86286	0.00419834	0.0202594	ENSG00000108405.3	chr17	3896592	3916500	-	P2RX1	protein_coding	HAVANA	3897817	3916225	ENSP00000225538.3|ENSP00000460449.1	ENSG00000108405
VWA5A	ENSG00000110002	201.264	-0.295809	0.0913473	-3.23829	0.00120247	0.00342836	ENSG00000110002.15	chr11	124115362	124147721	+	protein_coding	HAVANA|ENSEMBL	124117464	124145942	ENSP00000407726.2|ENSP00000355070.5|ENSP00000404683.1|ENSP00000376504.1|ENSP00000376501.4	ENSG00000110002	196.711	0.69475	0.13088	5.30829	1.11e-07	1.57e-06	ENSG00000110002.15	chr11	124115362	124147721	+	VWA5A	protein_coding	HAVANA|ENSEMBL	124117464	124145942	ENSP00000407726.2|ENSP00000355070.5|ENSP00000404683.1|ENSP00000376504.1|ENSP00000376501.4	ENSG00000110002
JDP2	ENSG00000140044	214.305	-0.233782	0.0724597	-3.22637	0.00125372	0.00356394	ENSG00000140044.12	chr14	75427716	75474111	+	protein_coding	HAVANA|ENSEMBL	75432327	75469472	ENSP00000415558.2|ENSP00000452769.1|ENSP00000409787.1|ENSP00000399587.2|ENSP00000267569.5	ENSG00000140044	212.284	0.542557	0.102409	5.29793	1.17e-07	1.66e-06	ENSG00000140044.12	chr14	75427716	75474111	+	JDP2	protein_coding	HAVANA|ENSEMBL	75432327	75469472	ENSP00000415558.2|ENSP00000452769.1|ENSP00000409787.1|ENSP00000399587.2|ENSP00000267569.5	ENSG00000140044
PCP4L1	ENSG00000248485	49.2766	-0.50567	0.156759	-3.22577	0.00125634	0.00357046	ENSG00000248485.1	chr1	161258727	161285450	+	protein_coding	HAVANA	161258975	161284478	ENSP00000426296.1	ENSG00000248485	45.5953	0.78972	0.233566	3.38114	0.000721864	0.0044843	ENSG00000248485.1	chr1	161258727	161285450	+	PCP4L1	protein_coding	HAVANA	161258975	161284478	ENSP00000426296.1	ENSG00000248485
MYZAP	ENSG00000263155	24.0274	-0.414936	0.128719	-3.22358	0.00126598	0.00359417	ENSG00000263155.5	chr15	57591941	57685364	+	protein_coding	HAVANA	57592035	57684495	ENSP00000267853.5|ENSP00000369939.4|ENSP00000457126.1|ENSP00000431396.1	ENSG00000263155	22.9045	0.811717	0.205361	3.95264	7.73e-05	0.000631605	ENSG00000263155.5	chr15	57591941	57685364	+	MYZAP	protein_coding	HAVANA	57592035	57684495	ENSP00000267853.5|ENSP00000369939.4|ENSP00000457126.1|ENSP00000431396.1	ENSG00000263155
CTB-13F3.1	ENSG00000273055	22.7847	-0.509934	0.158195	-3.22344	0.00126661	0.00359573	ENSG00000273055.1	chr7	107942116	107942740	+	antisense	HAVANA	NA	NA		ENSG00000273055	20.9996	0.769436	0.223404	3.44414	0.000572877	0.00367286	ENSG00000273055.1	chr7	107942116	107942740	+	CTB-13F3.1	antisense	HAVANA	NA	NA		ENSG00000273055
F10	ENSG00000126218	66.9539	-0.410406	0.127601	-3.21633	0.00129843	0.0036804	ENSG00000126218.11	chr13	113122814	113149529	+	protein_coding	HAVANA	113122856	113149514	ENSP00000387092.1|ENSP00000364701.3|ENSP00000364709.3|ENSP00000386320.2	ENSG00000126218	63.4604	0.654831	0.160007	4.09251	4.27e-05	0.000370869	ENSG00000126218.11	chr13	113122814	113149529	+	F10	protein_coding	HAVANA	113122856	113149514	ENSP00000387092.1|ENSP00000364701.3|ENSP00000364709.3|ENSP00000386320.2	ENSG00000126218
TIMP3	ENSG00000100234	3805.24	-0.429637	0.133903	-3.20857	0.00133397	0.00377375	ENSG00000100234.11	chr22	32801701	32863043	+	protein_coding	HAVANA	32802002	32859374	ENSP00000266085.5	ENSG00000100234	3602.77	1.38017	0.175985	7.84256	4.41e-15	1.77e-13	ENSG00000100234.11	chr22	32801701	32863043	+	TIMP3	protein_coding	HAVANA	32802002	32859374	ENSP00000266085.5	ENSG00000100234
PTEN	ENSG00000171862	1660.85	-0.260872	0.0818714	-3.18636	0.00144073	0.00405055	ENSG00000171862.9	chr10	87863113	87971930	+	protein_coding	HAVANA|ENSEMBL	87864470	87965469	ENSP00000361021.3|ENSP00000477517.1|ENSP00000483066.1	ENSG00000171862	1637.69	0.43908	0.114589	3.83179	0.000127216	0.000984841	ENSG00000171862.9	chr10	87863113	87971930	+	PTEN	protein_coding	HAVANA|ENSEMBL	87864470	87965469	ENSP00000361021.3|ENSP00000477517.1|ENSP00000483066.1	ENSG00000171862
NDE1	ENSG00000072864	472.417	-0.276669	0.0868717	-3.1848	0.00144853	0.0040712	ENSG00000072864.12	chr16	15643267	15726353	+	protein_coding	HAVANA|ENSEMBL	15664779	15724248	ENSP00000379643.1|ENSP00000379642.1|ENSP00000459889.1|ENSP00000460436.1|ENSP00000460996.1|ENSP00000345892.5|ENSP00000461729.1|ENSP00000459875.1|ENSP00000459863.1|ENSP00000461748.1|ENSP00000459918.1	ENSG00000072864	463.955	0.642216	0.130924	4.90525	9.33e-07	1.13e-05	ENSG00000072864.12	chr16	15643267	15726353	+	NDE1	protein_coding	HAVANA|ENSEMBL	15664779	15724248	ENSP00000379643.1|ENSP00000379642.1|ENSP00000459889.1|ENSP00000460436.1|ENSP00000460996.1|ENSP00000345892.5|ENSP00000461729.1|ENSP00000459875.1|ENSP00000459863.1|ENSP00000461748.1|ENSP00000459918.1	ENSG00000072864
PFKFB3	ENSG00000170525	603.373	-0.367995	0.115642	-3.1822	0.00146161	0.00410457	ENSG00000170525.18	chr10	6144934	6235545	+	protein_coding	HAVANA|ENSEMBL	6144998	6232939	ENSP00000369115.4|ENSP00000443319.2|ENSP00000369105.3|ENSP00000433771.1|ENSP00000434628.1|ENSP00000436885.1|ENSP00000432356.1|ENSP00000369111.1|ENSP00000486311.1|ENSP00000487277.1|ENSP00000353712.2|ENSP00000369100.4|ENSP00000390285.1|ENSP00000434342.1|ENSP00000416677.1|ENSP00000404995.1	ENSG00000170525	579.964	0.745378	0.158787	4.69419	2.68e-06	3e-05	ENSG00000170525.18	chr10	6144934	6235545	+	PFKFB3	protein_coding	HAVANA|ENSEMBL	6144998	6232939	ENSP00000369115.4|ENSP00000443319.2|ENSP00000369105.3|ENSP00000433771.1|ENSP00000434628.1|ENSP00000436885.1|ENSP00000432356.1|ENSP00000369111.1|ENSP00000486311.1|ENSP00000487277.1|ENSP00000353712.2|ENSP00000369100.4|ENSP00000390285.1|ENSP00000434342.1|ENSP00000416677.1|ENSP00000404995.1	ENSG00000170525
ZNF385D	ENSG00000151789	165.928	-0.381791	0.120233	-3.17541	0.00149623	0.00419354	ENSG00000151789.10	chr3	21412222	22373321	-	protein_coding	HAVANA	21421217	21750916	ENSP00000281523.2|ENSP00000388232.1	ENSG00000151789	158.747	0.551823	0.186035	2.96623	0.0030147	0.015261	ENSG00000151789.10	chr3	21412222	22373321	-	ZNF385D	protein_coding	HAVANA	21421217	21750916	ENSP00000281523.2|ENSP00000388232.1	ENSG00000151789
PPFIBP1	ENSG00000110841	1207.54	-0.213544	0.0673351	-3.17136	0.00151728	0.00424771	ENSG00000110841.13	chr12	27523431	27695564	+	protein_coding	HAVANA	27599476	27692879	ENSP00000442462.1|ENSP00000445822.1|ENSP00000438036.1|ENSP00000444304.1|ENSP00000445425.1|ENSP00000314724.8|ENSP00000444046.1|ENSP00000443442.1|ENSP00000228425.6|ENSP00000437438.1|ENSP00000445132.1|ENSP00000443324.1|ENSP00000479763.1|ENSP00000438174.1	ENSG00000110841	1202.81	0.350661	0.101036	3.47066	0.000519186	0.00337874	ENSG00000110841.13	chr12	27523431	27695564	+	PPFIBP1	protein_coding	HAVANA	27599476	27692879	ENSP00000442462.1|ENSP00000445822.1|ENSP00000438036.1|ENSP00000444304.1|ENSP00000445425.1|ENSP00000314724.8|ENSP00000444046.1|ENSP00000443442.1|ENSP00000228425.6|ENSP00000437438.1|ENSP00000445132.1|ENSP00000443324.1|ENSP00000479763.1|ENSP00000438174.1	ENSG00000110841
SUGT1	ENSG00000165416	738.781	-0.187734	0.059453	-3.15769	0.00159026	0.00443687	ENSG00000165416.14	chr13	52652709	52700909	+	protein_coding	HAVANA	52652921	52687832	ENSP00000367208.4|ENSP00000308067.7	ENSG00000165416	740.121	0.242602	0.089375	2.71442	0.00663913	0.0298041	ENSG00000165416.14	chr13	52652709	52700909	+	SUGT1	protein_coding	HAVANA	52652921	52687832	ENSP00000367208.4|ENSP00000308067.7	ENSG00000165416
LGI4	ENSG00000153902	186.278	-0.506047	0.160304	-3.15679	0.00159517	0.00444919	ENSG00000153902.13	chr19	35124513	35142451	-	protein_coding	HAVANA	35125196	35134680	ENSP00000312273.3|ENSP00000376059.3|ENSP00000467044.2|ENSP00000467784.1	ENSG00000153902	172.645	0.800863	0.197874	4.04733	5.18e-05	0.000441315	ENSG00000153902.13	chr19	35124513	35142451	-	LGI4	protein_coding	HAVANA	35125196	35134680	ENSP00000312273.3|ENSP00000376059.3|ENSP00000467044.2|ENSP00000467784.1	ENSG00000153902
FGF14-AS2	ENSG00000272143	11.9066	-0.46193	0.146624	-3.15043	0.00163031	0.0045389	ENSG00000272143.1	chr13	102394630	102395703	+	lincRNA	HAVANA	NA	NA		ENSG00000272143	11.0766	0.703604	0.240034	2.93126	0.00337589	0.0167975	ENSG00000272143.1	chr13	102394630	102395703	+	FGF14-AS2	lincRNA	HAVANA	NA	NA		ENSG00000272143
KCNAB1-AS2	ENSG00000240596	26.701	-0.567794	0.180462	-3.14633	0.00165333	0.00459864	ENSG00000240596.1	chr3	156215560	156227883	-	antisense	HAVANA	NA	NA		ENSG00000240596	24.3149	1.04628	0.244899	4.27227	1.93e-05	0.000181294	ENSG00000240596.1	chr3	156215560	156227883	-	KCNAB1-AS2	antisense	HAVANA	NA	NA		ENSG00000240596
FGF7	ENSG00000140285	282.951	-0.429724	0.136859	-3.13991	0.00168997	0.00469467	ENSG00000140285.9	chr15	49423096	49488775	+	protein_coding	HAVANA|ENSEMBL	49424298	49484501	ENSP00000267843.4|ENSP00000478148.1|ENSP00000454205.1|ENSP00000453048.1|ENSP00000453980.1	ENSG00000140285	267.801	1.04121	0.191944	5.42452	5.81e-08	8.66e-07	ENSG00000140285.9	chr15	49423096	49488775	+	FGF7	protein_coding	HAVANA|ENSEMBL	49424298	49484501	ENSP00000267843.4|ENSP00000478148.1|ENSP00000454205.1|ENSP00000453048.1|ENSP00000453980.1	ENSG00000140285
ZNF354C	ENSG00000177932	174.764	-0.17285	0.0552203	-3.13018	0.00174698	0.0048418	ENSG00000177932.6	chr5	179060415	179083537	+	protein_coding	HAVANA	179062069	179080094	ENSP00000324064.6	ENSG00000177932	175.739	0.271352	0.0840269	3.22934	0.00124074	0.0071607	ENSG00000177932.6	chr5	179060415	179083537	+	ZNF354C	protein_coding	HAVANA	179062069	179080094	ENSP00000324064.6	ENSG00000177932
GNRH1	ENSG00000147437	58.1396	-0.230011	0.0735214	-3.12849	0.0017571	0.00486649	ENSG00000147437.9	chr8	25419260	25424654	-	protein_coding	HAVANA	25419422	25423330	ENSP00000391280.2|ENSP00000276414.4	ENSG00000147437	57.6292	0.56653	0.108771	5.20844	1.9e-07	2.6e-06	ENSG00000147437.9	chr8	25419260	25424654	-	GNRH1	protein_coding	HAVANA	25419422	25423330	ENSP00000391280.2|ENSP00000276414.4	ENSG00000147437
TMTC1	ENSG00000133687	401.538	-0.321677	0.102884	-3.1266	0.00176838	0.0048959	ENSG00000133687.15	chr12	29500840	29784759	-	protein_coding	HAVANA	29506849	29783751	ENSP00000256062.5|ENSP00000448112.1|ENSP00000449043.1|ENSP00000442046.1|ENSP00000449054.1	ENSG00000133687	389.823	0.885742	0.128667	6.88396	5.82e-12	1.54e-10	ENSG00000133687.15	chr12	29500840	29784759	-	TMTC1	protein_coding	HAVANA	29506849	29783751	ENSP00000256062.5|ENSP00000448112.1|ENSP00000449043.1|ENSP00000442046.1|ENSP00000449054.1	ENSG00000133687
C15orf41	ENSG00000186073	141.739	-0.272624	0.0873419	-3.12134	0.00180028	0.00497924	ENSG00000186073.11	chr15	36579611	36810248	+	protein_coding	HAVANA|ENSEMBL	36579861	36808932	ENSP00000455397.1|ENSP00000457227.1|ENSP00000401362.2|ENSP00000456477.1|ENSP00000454831.1|ENSP00000456736.1|ENSP00000457854.1|ENSP00000342433.4|ENSP00000454334.1|ENSP00000456240.1	ENSG00000186073	138.86	0.364567	0.128962	2.82694	0.00469957	0.0222776	ENSG00000186073.11	chr15	36579611	36810248	+	C15orf41	protein_coding	HAVANA|ENSEMBL	36579861	36808932	ENSP00000455397.1|ENSP00000457227.1|ENSP00000401362.2|ENSP00000456477.1|ENSP00000454831.1|ENSP00000456736.1|ENSP00000457854.1|ENSP00000342433.4|ENSP00000454334.1|ENSP00000456240.1	ENSG00000186073
ITPRIP	ENSG00000148841	288.687	-0.268339	0.0860574	-3.11814	0.00181996	0.00502964	ENSG00000148841.15	chr10	104309698	104338404	-	protein_coding	HAVANA|ENSEMBL	104314411	104316051	ENSP00000278071.2|ENSP00000337178.1|ENSP00000350915.2|ENSP00000414141.1	ENSG00000148841	284.109	0.502292	0.129681	3.87329	0.000107377	0.000847554	ENSG00000148841.15	chr10	104309698	104338404	-	ITPRIP	protein_coding	HAVANA|ENSEMBL	104314411	104316051	ENSP00000278071.2|ENSP00000337178.1|ENSP00000350915.2|ENSP00000414141.1	ENSG00000148841
HPR	ENSG00000261701	36.7436	-0.749305	0.24075	-3.11238	0.00185585	0.0051211	ENSG00000261701.6	chr16	72063224	72077246	+	protein_coding	HAVANA|ENSEMBL	72063256	72077078	ENSP00000441828.2|ENSP00000349451.6|ENSP00000462916.1	ENSG00000261701	30.6126	1.07703	0.34271	3.14267	0.00167413	0.00925429	ENSG00000261701.6	chr16	72063224	72077246	+	HPR	protein_coding	HAVANA|ENSEMBL	72063256	72077078	ENSP00000441828.2|ENSP00000349451.6|ENSP00000462916.1	ENSG00000261701
RBMS3-AS2	ENSG00000203506	119.793	-0.356367	0.114573	-3.1104	0.00186834	0.00515301	ENSG00000203506.5	chr3	29526251	29642809	-	antisense	HAVANA	NA	NA		ENSG00000203506	115.282	0.802156	0.172885	4.63983	3.49e-06	3.83e-05	ENSG00000203506.5	chr3	29526251	29642809	-	RBMS3-AS2	antisense	HAVANA	NA	NA		ENSG00000203506
CTD-2515A14.1	ENSG00000261669	29.8427	-0.248993	0.0807272	-3.08437	0.00203985	0.00558673	ENSG00000261669.1	chr16	24803451	24819739	-	antisense	HAVANA	NA	NA		ENSG00000261669	29.6129	0.32977	0.118993	2.77134	0.00558262	0.0258142	ENSG00000261669.1	chr16	24803451	24819739	-	CTD-2515A14.1	antisense	HAVANA	NA	NA		ENSG00000261669
RP11-358D17.1	ENSG00000249002	7.78377	-0.480732	0.156323	-3.07525	0.00210327	0.0057455	ENSG00000249002.2	chr4	119006032	119006401	+	processed_pseudogene	HAVANA	NA	NA		ENSG00000249002	7.21008	0.597028	0.228109	2.61729	0.00886303	0.0378346	ENSG00000249002.2	chr4	119006032	119006401	+	RP11-358D17.1	processed_pseudogene	HAVANA	NA	NA		ENSG00000249002
NPR2	ENSG00000159899	170.044	-0.20921	0.0684547	-3.05618	0.00224179	0.00609044	ENSG00000159899.14	chr9	35792154	35809732	+	protein_coding	HAVANA	35792409	35809661	ENSP00000341083.2|ENSP00000399204.1|ENSP00000393029.1|ENSP00000402902.1	ENSG00000159899	169.28	0.45155	0.0962896	4.68949	2.74e-06	3.06e-05	ENSG00000159899.14	chr9	35792154	35809732	+	NPR2	protein_coding	HAVANA	35792409	35809661	ENSP00000341083.2|ENSP00000399204.1|ENSP00000393029.1|ENSP00000402902.1	ENSG00000159899
RP1-142L7.8	ENSG00000271208	6.62704	-0.556769	0.18228	-3.05446	0.00225463	0.00612158	ENSG00000271208.1	chr6	112234165	112234758	-	lincRNA	HAVANA	NA	NA		ENSG00000271208	6.05606	0.714007	0.278109	2.56736	0.0102476	0.0425637	ENSG00000271208.1	chr6	112234165	112234758	-	RP1-142L7.8	lincRNA	HAVANA	NA	NA		ENSG00000271208
ITM2C	ENSG00000135916	583.829	-0.25434	0.0833736	-3.05061	0.00228378	0.00619237	ENSG00000135916.15	chr2	230864639	230879248	+	protein_coding	HAVANA|ENSEMBL	230865026	230878715	ENSP00000390655.1|ENSP00000440295.1|ENSP00000322730.6|ENSP00000335121.6|ENSP00000322100.6|ENSP00000444899.1|ENSP00000387242.2|ENSP00000403257.2|ENSP00000480137.1	ENSG00000135916	576.315	0.330914	0.124766	2.65227	0.00799525	0.0346954	ENSG00000135916.15	chr2	230864639	230879248	+	ITM2C	protein_coding	HAVANA|ENSEMBL	230865026	230878715	ENSP00000390655.1|ENSP00000440295.1|ENSP00000322730.6|ENSP00000335121.6|ENSP00000322100.6|ENSP00000444899.1|ENSP00000387242.2|ENSP00000403257.2|ENSP00000480137.1	ENSG00000135916
SOCS3	ENSG00000184557	539.949	-0.649119	0.212832	-3.0499	0.00228914	0.00620541	ENSG00000184557.4	chr17	78356778	78360077	-	protein_coding	HAVANA	78358421	78359095	ENSP00000330341.2|ENSP00000464727.1	ENSG00000184557	482.277	1.12581	0.300481	3.74669	0.000179182	0.00133419	ENSG00000184557.4	chr17	78356778	78360077	-	SOCS3	protein_coding	HAVANA	78358421	78359095	ENSP00000330341.2|ENSP00000464727.1	ENSG00000184557
NPIPP1	ENSG00000188599	24.2532	-0.301231	0.0992646	-3.03463	0.00240835	0.00650108	ENSG00000188599.17	chr16	15104312	15123498	-	transcribed_unprocessed_pseudogene	HAVANA	NA	NA		ENSG00000188599	23.5803	0.43288	0.146123	2.96243	0.00305219	0.0154155	ENSG00000188599.17	chr16	15104312	15123498	-	NPIPP1	transcribed_unprocessed_pseudogene	HAVANA	NA	NA		ENSG00000188599
FAM66C	ENSG00000226711	93.8644	-0.27068	0.0892068	-3.0343	0.00241098	0.00650656	ENSG00000226711.6	chr12	8180209	8216151	+	antisense	HAVANA	NA	NA		ENSG00000226711	92.1495	0.483377	0.136965	3.52921	0.0004168	0.00279395	ENSG00000226711.6	chr12	8180209	8216151	+	FAM66C	antisense	HAVANA	NA	NA		ENSG00000226711
SH3BGRL	ENSG00000131171	748.37	-0.286965	0.0948833	-3.0244	0.00249127	0.00670777	ENSG00000131171.12	chrX	81201943	81298547	+	protein_coding	HAVANA	81202201	81297224	ENSP00000362308.5	ENSG00000131171	733.448	0.616119	0.142889	4.31188	1.62e-05	0.000155414	ENSG00000131171.12	chrX	81201943	81298547	+	SH3BGRL	protein_coding	HAVANA	81202201	81297224	ENSP00000362308.5	ENSG00000131171
CEACAM1	ENSG00000079385	276.741	-0.387046	0.128117	-3.02104	0.00251909	0.00677649	ENSG00000079385.21	chr19	42507304	42561234	-	protein_coding	HAVANA	42509112	42528374	ENSP00000244291.6|ENSP00000161559.6|ENSP00000384709.3|ENSP00000384083.1|ENSP00000351165.2|ENSP00000471918.1|ENSP00000471566.1|ENSP00000472633.1	ENSG00000079385	265.012	0.821492	0.204045	4.02603	5.67e-05	0.000479641	ENSG00000079385.21	chr19	42507304	42561234	-	CEACAM1	protein_coding	HAVANA	42509112	42528374	ENSP00000244291.6|ENSP00000161559.6|ENSP00000384709.3|ENSP00000384083.1|ENSP00000351165.2|ENSP00000471918.1|ENSP00000471566.1|ENSP00000472633.1	ENSG00000079385
SHROOM4	ENSG00000158352	218.735	-0.299645	0.0995383	-3.01035	0.00260949	0.00700011	ENSG00000158352.15	chrX	50591647	50814302	-	protein_coding	HAVANA|ENSEMBL	50596698	50814018	ENSP00000365188.2|ENSP00000289292.7|ENSP00000421450.1	ENSG00000158352	213.491	0.619032	0.114924	5.38644	7.19e-08	1.06e-06	ENSG00000158352.15	chrX	50591647	50814302	-	SHROOM4	protein_coding	HAVANA|ENSEMBL	50596698	50814018	ENSP00000365188.2|ENSP00000289292.7|ENSP00000421450.1	ENSG00000158352
SGCE	ENSG00000127990	149.512	-0.255746	0.0852588	-2.99964	0.00270301	0.00723519	ENSG00000127990.15	chr7	94585230	94656209	-	protein_coding	HAVANA	94585468	94656098	ENSP00000431080.1|ENSP00000265735.6|ENSP00000398930.2|ENSP00000394061.2|ENSP00000388734.1|ENSP00000397536.2|ENSP00000405313.2|ENSP00000398344.1|ENSP00000391892.1	ENSG00000127990	147.597	0.355389	0.1298	2.73798	0.00618172	0.0280831	ENSG00000127990.15	chr7	94585230	94656209	-	SGCE	protein_coding	HAVANA	94585468	94656098	ENSP00000431080.1|ENSP00000265735.6|ENSP00000398930.2|ENSP00000394061.2|ENSP00000388734.1|ENSP00000397536.2|ENSP00000405313.2|ENSP00000398344.1|ENSP00000391892.1	ENSG00000127990
ENPP7P12	ENSG00000254527	11.3963	-0.41083	0.137804	-2.98126	0.00287067	0.00764747	ENSG00000254527.1	chr8	12205759	12206389	-	processed_pseudogene	HAVANA	NA	NA		ENSG00000254527	10.8382	0.919278	0.205378	4.47603	7.6e-06	7.84e-05	ENSG00000254527.1	chr8	12205759	12206389	-	ENPP7P12	processed_pseudogene	HAVANA	NA	NA		ENSG00000254527
SH3GLB1	ENSG00000097033	684.085	-0.187437	0.0630906	-2.97092	0.0029691	0.00788974	ENSG00000097033.14	chr1	86704570	86748184	+	protein_coding	HAVANA|ENSEMBL	86704900	86743232	ENSP00000479919.1|ENSP00000441355.1|ENSP00000473267.1|ENSP00000418744.1	ENSG00000097033	686.022	0.326428	0.0892231	3.65856	0.000253635	0.00181123	ENSG00000097033.14	chr1	86704570	86748184	+	SH3GLB1	protein_coding	HAVANA|ENSEMBL	86704900	86743232	ENSP00000479919.1|ENSP00000441355.1|ENSP00000473267.1|ENSP00000418744.1	ENSG00000097033
CLIP4	ENSG00000115295	380.18	-0.234481	0.0789395	-2.97039	0.00297423	0.00790244	ENSG00000115295.19	chr2	29097705	29189643	+	protein_coding	HAVANA	29121389	29189602	ENSP00000384242.1|ENSP00000385148.2|ENSP00000414417.1|ENSP00000385594.1|ENSP00000399029.1|ENSP00000327009.5|ENSP00000393354.1|ENSP00000392296.1	ENSG00000115295	377.122	0.450983	0.109869	4.10473	4.05e-05	0.000353814	ENSG00000115295.19	chr2	29097705	29189643	+	CLIP4	protein_coding	HAVANA	29121389	29189602	ENSP00000384242.1|ENSP00000385148.2|ENSP00000414417.1|ENSP00000385594.1|ENSP00000399029.1|ENSP00000327009.5|ENSP00000393354.1|ENSP00000392296.1	ENSG00000115295
RAB12	ENSG00000206418	237.387	-0.18923	0.0637789	-2.96697	0.00300754	0.00798422	ENSG00000206418.3	chr18	8609445	8639381	+	protein_coding	HAVANA	8609728	8638259	ENSP00000331748.6	ENSG00000206418	237.705	0.297301	0.0921666	3.22569	0.0012567	0.00724054	ENSG00000206418.3	chr18	8609445	8639381	+	RAB12	protein_coding	HAVANA	8609728	8638259	ENSP00000331748.6	ENSG00000206418
TTLL3	ENSG00000214021	688.851	-0.18666	0.0631645	-2.95514	0.00312532	0.00826914	ENSG00000214021.15	chr3	9808086	9855138	+	protein_coding	HAVANA	9810007	9854618	ENSP00000399930.1|ENSP00000399782.1|ENSP00000401686.1|ENSP00000414965.1|ENSP00000408128.1|ENSP00000394481.1|ENSP00000400462.1|ENSP00000402197.1|ENSP00000395912.1|ENSP00000392549.4|ENSP00000389904.1|ENSP00000398996.1|ENSP00000412915.1|ENSP00000396606.1|ENSP00000312148.7|ENSP00000473440.1|ENSP00000473376.1|ENSP00000399191.1|ENSP00000398097.1|ENSP00000373338.1|ENSP00000430051.1|ENSP00000409632.1|ENS…	ENSG00000214021	690.461	0.330922	0.0910444	3.63473	0.000278272	0.00196131	ENSG00000214021.15	chr3	9808086	9855138	+	TTLL3	protein_coding	HAVANA	9810007	9854618	ENSP00000399930.1|ENSP00000399782.1|ENSP00000401686.1|ENSP00000414965.1|ENSP00000408128.1|ENSP00000394481.1|ENSP00000400462.1|ENSP00000402197.1|ENSP00000395912.1|ENSP00000392549.4|ENSP00000389904.1|ENSP00000398996.1|ENSP00000412915.1|ENSP00000396606.1|ENSP00000312148.7|ENSP00000473440.1|ENSP00000473376.1|ENSP00000399191.1|ENSP00000398097.1|ENSP00000373338.1|ENSP00000430051.1|ENSP00000409632.1|ENS…	ENSG00000214021
MIR222HG	ENSG00000270069	136.013	-0.475962	0.161154	-2.95347	0.00314226	0.0083105	ENSG00000270069.1	chrX	45745211	45770274	-	lincRNA	HAVANA	NA	NA		ENSG00000270069	127.275	1.12972	0.212691	5.31156	1.09e-07	1.55e-06	ENSG00000270069.1	chrX	45745211	45770274	-	MIR222HG	lincRNA	HAVANA	NA	NA		ENSG00000270069
RP11-1277A3.1	ENSG00000247679	84.3349	-0.244481	0.0830014	-2.9455	0.00322429	0.00850866	ENSG00000247679.2	chr5	177611253	177619754	+	antisense	HAVANA	NA	NA		ENSG00000247679	83.5256	0.400327	0.124849	3.20648	0.00134369	0.00766691	ENSG00000247679.2	chr5	177611253	177619754	+	RP11-1277A3.1	antisense	HAVANA	NA	NA		ENSG00000247679
CNTFR	ENSG00000122756	66.1791	-0.454034	0.154184	-2.94475	0.00323211	0.00852775	ENSG00000122756.14	chr9	34551432	34590140	-	protein_coding	HAVANA|ENSEMBL	34552163	34568981	ENSP00000242338.4|ENSP00000368265.3|ENSP00000480451.1|ENSP00000388082.1	ENSG00000122756	62.0898	0.737661	0.225406	3.27259	0.00106565	0.00628283	ENSG00000122756.14	chr9	34551432	34590140	-	CNTFR	protein_coding	HAVANA|ENSEMBL	34552163	34568981	ENSP00000242338.4|ENSP00000368265.3|ENSP00000480451.1|ENSP00000388082.1	ENSG00000122756
ITIH5	ENSG00000123243	732.424	-0.370567	0.126047	-2.93991	0.00328307	0.0086483	ENSG00000123243.14	chr10	7559270	7666998	-	protein_coding	HAVANA|ENSEMBL	7563086	7666892	ENSP00000380333.3|ENSP00000485414.1|ENSP00000380332.2|ENSP00000419386.1	ENSG00000123243	703.18	0.942234	0.167219	5.63472	1.75e-08	2.85e-07	ENSG00000123243.14	chr10	7559270	7666998	-	ITIH5	protein_coding	HAVANA|ENSEMBL	7563086	7666892	ENSP00000380333.3|ENSP00000485414.1|ENSP00000380332.2|ENSP00000419386.1	ENSG00000123243
GABBR1	ENSG00000204681	860.187	-0.217886	0.0743979	-2.92866	0.00340422	0.00894191	ENSG00000204681.10	chr6	29555629	29633976	-	protein_coding	HAVANA|ENSEMBL	29603546	29632696	ENSP00000348248.3|ENSP00000419356.1|ENSP00000366215.4|ENSP00000366211.4|ENSP00000417478.1|ENSP00000366233.4|ENSP00000419061.1|ENSP00000366176.3|ENSP00000417663.1|ENSP00000420602.1|ENSP00000419755.1|ENSP00000417332.1	ENSG00000204681	856.311	0.546381	0.107593	5.07823	3.81e-07	4.96e-06	ENSG00000204681.10	chr6	29555629	29633976	-	GABBR1	protein_coding	HAVANA|ENSEMBL	29603546	29632696	ENSP00000348248.3|ENSP00000419356.1|ENSP00000366215.4|ENSP00000366211.4|ENSP00000417478.1|ENSP00000366233.4|ENSP00000419061.1|ENSP00000366176.3|ENSP00000417663.1|ENSP00000420602.1|ENSP00000419755.1|ENSP00000417332.1	ENSG00000204681
AGPAT4	ENSG00000026652	189.042	-0.215864	0.0738127	-2.92449	0.00345023	0.00905363	ENSG00000026652.13	chr6	161129979	161274061	-	protein_coding	HAVANA|ENSEMBL	161136543	161232213	ENSP00000355878.5|ENSP00000314036.4|ENSP00000400211.1|ENSP00000413901.1|ENSP00000355872.3	ENSG00000026652	188.066	0.296772	0.109258	2.71625	0.00660264	0.0296606	ENSG00000026652.13	chr6	161129979	161274061	-	AGPAT4	protein_coding	HAVANA|ENSEMBL	161136543	161232213	ENSP00000355878.5|ENSP00000314036.4|ENSP00000400211.1|ENSP00000413901.1|ENSP00000355872.3	ENSG00000026652
AOC3	ENSG00000131471	570.015	-0.433928	0.148729	-2.91758	0.00352759	0.00923912	ENSG00000131471.6	chr17	42851184	42858130	+	protein_coding	HAVANA|ENSEMBL	42851344	42856547	ENSP00000312326.1|ENSP00000484312.1|ENSP00000464787.1|ENSP00000477686.1|ENSP00000465913.1|ENSP00000468632.1|ENSP00000468043.1	ENSG00000131471	538.875	1.48999	0.16475	9.04395	1.51e-19	1e-17	ENSG00000131471.6	chr17	42851184	42858130	+	AOC3	protein_coding	HAVANA|ENSEMBL	42851344	42856547	ENSP00000312326.1|ENSP00000484312.1|ENSP00000464787.1|ENSP00000477686.1|ENSP00000465913.1|ENSP00000468632.1|ENSP00000468043.1	ENSG00000131471
AC078889.1	ENSG00000266539	6.96442	-0.498296	0.170927	-2.91526	0.00355391	0.00930036	ENSG00000266539.1	chr12	66235556	66235622	-	miRNA	ENSEMBL	NA	NA		ENSG00000266539	6.51385	0.833162	0.268642	3.10138	0.00192623	0.0104458	ENSG00000266539.1	chr12	66235556	66235622	-	AC078889.1	miRNA	ENSEMBL	NA	NA		ENSG00000266539
CNTLN	ENSG00000044459	332.506	-0.215583	0.0740115	-2.91283	0.00358165	0.00936464	ENSG00000044459.14	chr9	17134982	17503923	+	protein_coding	HAVANA	17135066	17502649	ENSP00000370021.3|ENSP00000370015.3	ENSG00000044459	330.947	0.352515	0.10832	3.2544	0.00113634	0.00664388	ENSG00000044459.14	chr9	17134982	17503923	+	CNTLN	protein_coding	HAVANA	17135066	17502649	ENSP00000370021.3|ENSP00000370015.3	ENSG00000044459
CORO1C	ENSG00000110880	965.568	-0.267204	0.0923411	-2.89366	0.00380782	0.00990597	ENSG00000110880.10	chr12	108645109	108731596	-	protein_coding	HAVANA|ENSEMBL	108647406	108702949	ENSP00000261401.3|ENSP00000394496.2|ENSP00000438341.1|ENSP00000447337.1|ENSP00000415554.2|ENSP00000448130.1|ENSP00000447534.1|ENSP00000449658.1|ENSP00000449330.1|ENSP00000447989.1|ENSP00000448527.1|ENSP00000448195.1|ENSP00000447049.1	ENSG00000110880	950.696	0.871294	0.124383	7.00492	2.47e-12	6.94e-11	ENSG00000110880.10	chr12	108645109	108731596	-	CORO1C	protein_coding	HAVANA|ENSEMBL	108647406	108702949	ENSP00000261401.3|ENSP00000394496.2|ENSP00000438341.1|ENSP00000447337.1|ENSP00000415554.2|ENSP00000448130.1|ENSP00000447534.1|ENSP00000449658.1|ENSP00000449330.1|ENSP00000447989.1|ENSP00000448527.1|ENSP00000448195.1|ENSP00000447049.1	ENSG00000110880
RARG	ENSG00000172819	169.778	-0.235961	0.0816427	-2.89016	0.0038504	0.01001	ENSG00000172819.16	chr12	53210567	53232980	-	protein_coding	HAVANA|ENSEMBL	53211679	53227545	ENSP00000377947.2|ENSP00000388510.2|ENSP00000343698.5|ENSP00000444335.1|ENSP00000454417.1|ENSP00000454604.1|ENSP00000454385.1	ENSG00000172819	168.139	0.42264	0.118297	3.57269	0.000353339	0.00242021	ENSG00000172819.16	chr12	53210567	53232980	-	RARG	protein_coding	HAVANA|ENSEMBL	53211679	53227545	ENSP00000377947.2|ENSP00000388510.2|ENSP00000343698.5|ENSP00000444335.1|ENSP00000454417.1|ENSP00000454604.1|ENSP00000454385.1	ENSG00000172819
COL4A3	ENSG00000169031	500.768	-0.351339	0.122195	-2.87522	0.00403741	0.0104698	ENSG00000169031.18	chr2	227164565	227314792	+	protein_coding	HAVANA	227164727	227311867	ENSP00000379823.3|ENSP00000302781.8	ENSG00000169031	483.019	0.92852	0.172018	5.39781	6.75e-08	9.96e-07	ENSG00000169031.18	chr2	227164565	227314792	+	COL4A3	protein_coding	HAVANA	227164727	227311867	ENSP00000379823.3|ENSP00000302781.8	ENSG00000169031
ATP1A2	ENSG00000018625	552.556	-0.502064	0.1749	-2.87057	0.00409731	0.0106108	ENSG00000018625.14	chr1	160115759	160143591	+	protein_coding	HAVANA	160115862	160141319	ENSP00000354490.3|ENSP00000376066.3|ENSP00000411705.1	ENSG00000018625	513.037	1.37998	0.204598	6.74482	1.53e-11	3.87e-10	ENSG00000018625.14	chr1	160115759	160143591	+	ATP1A2	protein_coding	HAVANA	160115862	160141319	ENSP00000354490.3|ENSP00000376066.3|ENSP00000411705.1	ENSG00000018625
FAT4	ENSG00000196159	790.252	-0.336766	0.117466	-2.86692	0.0041449	0.0107246	ENSG00000196159.11	chr4	125316399	125492932	+	protein_coding	HAVANA	125316412	125491765	ENSP00000377862.3|ENSP00000335169.5	ENSG00000196159	765.09	1.27423	0.148228	8.59642	8.22e-18	4.39e-16	ENSG00000196159.11	chr4	125316399	125492932	+	FAT4	protein_coding	HAVANA	125316412	125491765	ENSP00000377862.3|ENSP00000335169.5	ENSG00000196159
MOB2	ENSG00000182208	199.153	-0.175728	0.0620252	-2.83317	0.00460885	0.011816	ENSG00000182208.12	chr11	1469457	1501247	-	protein_coding	HAVANA|ENSEMBL	1470175	1486556	ENSP00000479647.1|ENSP00000328694.6	ENSG00000182208	199.948	0.310209	0.0820574	3.78039	0.000156584	0.00118283	ENSG00000182208.12	chr11	1469457	1501247	-	MOB2	protein_coding	HAVANA|ENSEMBL	1470175	1486556	ENSP00000479647.1|ENSP00000328694.6	ENSG00000182208
ABCA8	ENSG00000141338	519.73	-0.368771	0.130353	-2.82902	0.00466904	0.0119578	ENSG00000141338.13	chr17	68867292	68955392	-	protein_coding	HAVANA|ENSEMBL	68868088	68942034	ENSP00000269080.1|ENSP00000402814.3|ENSP00000467271.1|ENSP00000467186.1|ENSP00000481467.1|ENSP00000466126.1	ENSG00000141338	499.085	1.13096	0.149239	7.57817	3.5e-14	1.26e-12	ENSG00000141338.13	chr17	68867292	68955392	-	ABCA8	protein_coding	HAVANA|ENSEMBL	68868088	68942034	ENSP00000269080.1|ENSP00000402814.3|ENSP00000467271.1|ENSP00000467186.1|ENSP00000481467.1|ENSP00000466126.1	ENSG00000141338
TUBE1	ENSG00000074935	214.359	-0.200061	0.0709888	-2.8182	0.00482936	0.0123292	ENSG00000074935.13	chr6	112070777	112087529	-	protein_coding	HAVANA	112071415	112087434	ENSP00000357651.5|ENSP00000474458.1|ENSP00000475087.1|ENSP00000474989.1	ENSG00000074935	214.246	0.567393	0.100075	5.66968	1.43e-08	2.36e-07	ENSG00000074935.13	chr6	112070777	112087529	-	TUBE1	protein_coding	HAVANA	112071415	112087434	ENSP00000357651.5|ENSP00000474458.1|ENSP00000475087.1|ENSP00000474989.1	ENSG00000074935
AC124914.3	ENSG00000231395	27.9321	-0.231774	0.0823872	-2.81323	0.00490468	0.0125093	ENSG00000231395.1	chr3	23878981	23879498	-	processed_pseudogene	HAVANA	NA	NA		ENSG00000231395	27.7975	0.338626	0.127256	2.66099	0.00779119	0.0339831	ENSG00000231395.1	chr3	23878981	23879498	-	AC124914.3	processed_pseudogene	HAVANA	NA	NA		ENSG00000231395
ALDH1L2	ENSG00000136010	260.714	-0.276283	0.0983019	-2.81055	0.00494562	0.0126057	ENSG00000136010.13	chr12	105019784	105084577	-	protein_coding	HAVANA	105024427	105084436	ENSP00000258494.9|ENSP00000447538.1|ENSP00000447464.1	ENSG00000136010	255.88	0.519392	0.153196	3.39038	0.000697965	0.00435874	ENSG00000136010.13	chr12	105019784	105084577	-	ALDH1L2	protein_coding	HAVANA	105024427	105084436	ENSP00000258494.9|ENSP00000447538.1|ENSP00000447464.1	ENSG00000136010
CREBBP	ENSG00000005339	2453.08	-0.157547	0.0561863	-2.804	0.00504725	0.012844	ENSG00000005339.13	chr16	3725054	3880726	-	protein_coding	HAVANA	3727721	3879916	ENSP00000262367.5|ENSP00000371502.3|ENSP00000461002.2|ENSP00000460474.2|ENSP00000459490.1|ENSP00000458254.1	ENSG00000005339	2476.53	0.215024	0.0833003	2.58131	0.00984253	0.0411902	ENSG00000005339.13	chr16	3725054	3880726	-	CREBBP	protein_coding	HAVANA	3727721	3879916	ENSP00000262367.5|ENSP00000371502.3|ENSP00000461002.2|ENSP00000460474.2|ENSP00000459490.1|ENSP00000458254.1	ENSG00000005339
LONRF3	ENSG00000175556	82.2021	-0.325585	0.116331	-2.79877	0.00512972	0.0130382	ENSG00000175556.16	chrX	118974614	119018355	+	protein_coding	HAVANA|ENSEMBL	118974781	119017687	ENSP00000307732.7|ENSP00000435426.1|ENSP00000360690.3|ENSP00000414519.1|ENSP00000408894.2	ENSG00000175556	79.8474	0.920655	0.16763	5.49218	3.97e-08	6.07e-07	ENSG00000175556.16	chrX	118974614	119018355	+	LONRF3	protein_coding	HAVANA|ENSEMBL	118974781	119017687	ENSP00000307732.7|ENSP00000435426.1|ENSP00000360690.3|ENSP00000414519.1|ENSP00000408894.2	ENSG00000175556
CTC-786C10.1	ENSG00000262601	15.0803	-0.391778	0.140608	-2.7863	0.00533128	0.0135032	ENSG00000262601.1	chr16	85171276	85185363	+	lincRNA	HAVANA	NA	NA		ENSG00000262601	14.3672	0.828924	0.21672	3.82486	0.000130847	0.00100995	ENSG00000262601.1	chr16	85171276	85185363	+	CTC-786C10.1	lincRNA	HAVANA	NA	NA		ENSG00000262601
PPM1D	ENSG00000170836	163.323	-0.121903	0.0437927	-2.78364	0.00537526	0.0136053	ENSG00000170836.11	chr17	60600183	60666280	+	protein_coding	HAVANA|ENSEMBL	60600415	60663549	ENSP00000486573.1|ENSP00000306682.2|ENSP00000376720.3|ENSP00000465168.1	ENSG00000170836	166.11	0.27796	0.0632143	4.3971	1.1e-05	0.000108917	ENSG00000170836.11	chr17	60600183	60666280	+	PPM1D	protein_coding	HAVANA|ENSEMBL	60600415	60663549	ENSP00000486573.1|ENSP00000306682.2|ENSP00000376720.3|ENSP00000465168.1	ENSG00000170836
RP11-729I10.2	ENSG00000257022	12.9208	-0.407328	0.146738	-2.7759	0.00550499	0.0139161	ENSG00000257022.1	chr12	21827210	21887957	+	antisense	HAVANA	NA	NA		ENSG00000257022	12.0523	0.601535	0.210239	2.8612	0.00422041	0.0203526	ENSG00000257022.1	chr12	21827210	21887957	+	RP11-729I10.2	antisense	HAVANA	NA	NA		ENSG00000257022
STARD4	ENSG00000164211	215.923	-0.302293	0.109062	-2.77174	0.00557576	0.014083	ENSG00000164211.12	chr5	111496033	111512590	-	protein_coding	HAVANA	111499889	111507433	ENSP00000296632.3|ENSP00000426148.1|ENSP00000425014.1|ENSP00000427478.2|ENSP00000427639.1|ENSP00000425308.1|ENSP00000407063.2	ENSG00000164211	210.843	0.634629	0.138657	4.57697	4.72e-06	5.06e-05	ENSG00000164211.12	chr5	111496033	111512590	-	STARD4	protein_coding	HAVANA	111499889	111507433	ENSP00000296632.3|ENSP00000426148.1|ENSP00000425014.1|ENSP00000427478.2|ENSP00000427639.1|ENSP00000425308.1|ENSP00000407063.2	ENSG00000164211
VDAC3	ENSG00000078668	271.74	-0.152569	0.0554906	-2.74946	0.00596934	0.0150001	ENSG00000078668.13	chr8	42391624	42405897	+	protein_coding	HAVANA	42394212	42405459	ENSP00000428977.1|ENSP00000428519.1|ENSP00000429006.1|ENSP00000428029.1|ENSP00000430373.1|ENSP00000428845.1|ENSP00000022615.4|ENSP00000430908.1	ENSG00000078668	274.448	0.196914	0.0772068	2.55047	0.0107578	0.0443499	ENSG00000078668.13	chr8	42391624	42405897	+	VDAC3	protein_coding	HAVANA	42394212	42405459	ENSP00000428977.1|ENSP00000428519.1|ENSP00000429006.1|ENSP00000428029.1|ENSP00000430373.1|ENSP00000428845.1|ENSP00000022615.4|ENSP00000430908.1	ENSG00000078668
TNRC6A	ENSG00000090905	1685.58	-0.146707	0.0534565	-2.74441	0.00606195	0.0152181	ENSG00000090905.17	chr16	24729695	24827632	+	protein_coding	HAVANA	24729842	24827525	ENSP00000326900.7|ENSP00000379144.3|ENSP00000460688.1|ENSP00000404278.2|ENSP00000457273.1|ENSP00000459297.1|ENSP00000456394.1	ENSG00000090905	1705.59	0.311797	0.074465	4.18716	2.82e-05	0.000255726	ENSG00000090905.17	chr16	24729695	24827632	+	TNRC6A	protein_coding	HAVANA	24729842	24827525	ENSP00000326900.7|ENSP00000379144.3|ENSP00000460688.1|ENSP00000404278.2|ENSP00000457273.1|ENSP00000459297.1|ENSP00000456394.1	ENSG00000090905
EFNB1	ENSG00000090776	118.768	-0.295083	0.107696	-2.73996	0.00614463	0.015403	ENSG00000090776.5	chrX	68828997	68842147	+	protein_coding	HAVANA	68829777	68840651	ENSP00000204961.4	ENSG00000090776	116.198	1.08031	0.140204	7.70528	1.31e-14	4.93e-13	ENSG00000090776.5	chrX	68828997	68842147	+	EFNB1	protein_coding	HAVANA	68829777	68840651	ENSP00000204961.4	ENSG00000090776
FEZ1	ENSG00000149557	126.79	-0.254798	0.093066	-2.73782	0.00618479	0.0154928	ENSG00000149557.12	chr11	125445745	125496317	-	protein_coding	HAVANA	125446098	125489777	ENSP00000278919.3|ENSP00000463116.1|ENSP00000393425.2|ENSP00000431521.1|ENSP00000434803.1	ENSG00000149557	124.849	0.455476	0.125879	3.61836	0.00029648	0.00207208	ENSG00000149557.12	chr11	125445745	125496317	-	FEZ1	protein_coding	HAVANA	125446098	125489777	ENSP00000278919.3|ENSP00000463116.1|ENSP00000393425.2|ENSP00000431521.1|ENSP00000434803.1	ENSG00000149557
QSER1	ENSG00000060749	607.308	-0.237406	0.0867731	-2.73594	0.00622017	0.0155747	ENSG00000060749.14	chr11	32893178	32993316	+	protein_coding	HAVANA	32928027	32993207	ENSP00000382241.2|ENSP00000432766.1|ENSP00000436870.1|ENSP00000432136.1	ENSG00000060749	602.062	0.581037	0.135795	4.27877	1.88e-05	0.000177199	ENSG00000060749.14	chr11	32893178	32993316	+	QSER1	protein_coding	HAVANA	32928027	32993207	ENSP00000382241.2|ENSP00000432766.1|ENSP00000436870.1|ENSP00000432136.1	ENSG00000060749
CLASP1	ENSG00000074054	1131.39	-0.132196	0.0483513	-2.73408	0.00625553	0.0156582	ENSG00000074054.17	chr2	121337776	121649587	-	protein_coding	HAVANA|ENSEMBL	121340864	121605895	ENSP00000441625.1|ENSP00000380717.4|ENSP00000263710.4|ENSP00000386442.3|ENSP00000389372.3|ENSP00000400562.3|ENSP00000392886.1|ENSP00000402101.1	ENSG00000074054	1148.25	0.192284	0.0730341	2.63279	0.00846858	0.0364212	ENSG00000074054.17	chr2	121337776	121649587	-	CLASP1	protein_coding	HAVANA|ENSEMBL	121340864	121605895	ENSP00000441625.1|ENSP00000380717.4|ENSP00000263710.4|ENSP00000386442.3|ENSP00000389372.3|ENSP00000400562.3|ENSP00000392886.1|ENSP00000402101.1	ENSG00000074054
IGF2	ENSG00000167244	1053.68	-0.579804	0.212531	-2.72809	0.00637022	0.015918	ENSG00000167244.18	chr11	2129112	2141238	-	protein_coding	HAVANA	2132990	2140296	ENSP00000370802.1|ENSP00000370813.4|ENSP00000414497.2|ENSP00000391826.2|ENSP00000370799.1|ENSP00000370796.1|ENSP00000402047.2	ENSG00000167244	960.252	1.60639	0.265846	6.04256	1.52e-09	2.91e-08	ENSG00000167244.18	chr11	2129112	2141238	-	IGF2	protein_coding	HAVANA	2132990	2140296	ENSP00000370802.1|ENSP00000370813.4|ENSP00000414497.2|ENSP00000391826.2|ENSP00000370799.1|ENSP00000370796.1|ENSP00000402047.2	ENSG00000167244
LMCD1	ENSG00000071282	300.147	-0.35771	0.131485	-2.72054	0.00651744	0.0162529	ENSG00000071282.11	chr3	8501707	8574673	+	protein_coding	HAVANA|ENSEMBL	8501939	8567595	ENSP00000157600.3|ENSP00000411222.2|ENSP00000380542.3|ENSP00000400555.1|ENSP00000396515.1|ENSP00000405049.1	ENSG00000071282	289.217	0.688447	0.178191	3.86354	0.000111757	0.00087821	ENSG00000071282.11	chr3	8501707	8574673	+	LMCD1	protein_coding	HAVANA|ENSEMBL	8501939	8567595	ENSP00000157600.3|ENSP00000411222.2|ENSP00000380542.3|ENSP00000400555.1|ENSP00000396515.1|ENSP00000405049.1	ENSG00000071282
RNF38	ENSG00000137075	589.637	-0.143494	0.0528627	-2.71446	0.00663841	0.0165257	ENSG00000137075.17	chr9	36336396	36487548	-	protein_coding	HAVANA|ENSEMBL	36339755	36400108	ENSP00000259605.6|ENSP00000335239.5|ENSP00000483536.1|ENSP00000349566.3|ENSP00000343947.4|ENSP00000367117.2|ENSP00000367109.3	ENSG00000137075	596.623	0.216887	0.0808719	2.68185	0.00732154	0.0322985	ENSG00000137075.17	chr9	36336396	36487548	-	RNF38	protein_coding	HAVANA|ENSEMBL	36339755	36400108	ENSP00000259605.6|ENSP00000335239.5|ENSP00000483536.1|ENSP00000349566.3|ENSP00000343947.4|ENSP00000367117.2|ENSP00000367109.3	ENSG00000137075
AC007193.10	ENSG00000269124	7.05049	-0.657321	0.242177	-2.71421	0.00664338	0.0165362	ENSG00000269124.1	chr19	46320197	46340004	-	antisense	HAVANA	NA	NA		ENSG00000269124	6.22952	1.85758	0.387869	4.78918	1.67e-06	1.95e-05	ENSG00000269124.1	chr19	46320197	46340004	-	AC007193.10	antisense	HAVANA	NA	NA		ENSG00000269124
VPS36	ENSG00000136100	679.253	-0.167811	0.0619574	-2.70848	0.00675915	0.0167961	ENSG00000136100.12	chr13	52412602	52450628	-	protein_coding	HAVANA|ENSEMBL	52415833	52450594	ENSP00000484968.1|ENSP00000367299.3	ENSG00000136100	683.995	0.24991	0.0853627	2.92763	0.00341558	0.0169664	ENSG00000136100.12	chr13	52412602	52450628	-	VPS36	protein_coding	HAVANA|ENSEMBL	52415833	52450594	ENSP00000484968.1|ENSP00000367299.3	ENSG00000136100
AC012066.1	ENSG00000213197	36.1379	-0.259339	0.0969081	-2.67614	0.00744757	0.0183554	ENSG00000213197.3	chr2	152389937	152390630	+	processed_pseudogene	HAVANA	NA	NA		ENSG00000213197	35.5743	0.395544	0.149095	2.65297	0.00797876	0.0346442	ENSG00000213197.3	chr2	152389937	152390630	+	AC012066.1	processed_pseudogene	HAVANA	NA	NA		ENSG00000213197
RP11-16P20.4	ENSG00000279302	38.9726	-0.361473	0.135115	-2.6753	0.00746615	0.0183968	ENSG00000279302.1	chr8	27701194	27703789	+	TEC	HAVANA	NA	NA		ENSG00000279302	37.3138	0.884731	0.209094	4.23125	2.32e-05	0.000214427	ENSG00000279302.1	chr8	27701194	27703789	+	RP11-16P20.4	TEC	HAVANA	NA	NA		ENSG00000279302
GSTM4	ENSG00000168765	135.821	-0.250027	0.0940025	-2.65979	0.00781904	0.0191886	ENSG00000168765.15	chr1	109656081	109674836	+	protein_coding	HAVANA|ENSEMBL	109656390	109674833	ENSP00000358851.4|ENSP00000316471.5|ENSP00000358848.1|ENSP00000336744.6	ENSG00000168765	134.044	0.38506	0.14193	2.71303	0.00666703	0.0299039	ENSG00000168765.15	chr1	109656081	109674836	+	GSTM4	protein_coding	HAVANA|ENSEMBL	109656390	109674833	ENSP00000358851.4|ENSP00000316471.5|ENSP00000358848.1|ENSP00000336744.6	ENSG00000168765
MAMDC2	ENSG00000165072	150.664	-0.355951	0.13385	-2.65932	0.00782983	0.0192108	ENSG00000165072.9	chr9	70043581	70226970	+	protein_coding	HAVANA	70044198	70226029	ENSP00000366387.4	ENSG00000165072	145.021	1.09143	0.159766	6.83145	8.41e-12	2.19e-10	ENSG00000165072.9	chr9	70043581	70226970	+	MAMDC2	protein_coding	HAVANA	70044198	70226029	ENSP00000366387.4	ENSG00000165072
MYOC	ENSG00000034971	62.3477	-0.594751	0.224064	-2.65438	0.00794545	0.0194773	ENSG00000034971.14	chr1	171635417	171652683	-	protein_coding	HAVANA|ENSEMBL	171635928	171652611	ENSP00000037502.5|ENSP00000478680.1	ENSG00000034971	56.5637	1.04005	0.316778	3.28321	0.00102633	0.00607768	ENSG00000034971.14	chr1	171635417	171652683	-	MYOC	protein_coding	HAVANA|ENSEMBL	171635928	171652611	ENSP00000037502.5|ENSP00000478680.1	ENSG00000034971
SPATA6	ENSG00000132122	249.34	-0.203322	0.0767163	-2.65031	0.00804178	0.0196862	ENSG00000132122.11	chr1	48295372	48472208	-	protein_coding	HAVANA|ENSEMBL	48298716	48472008	ENSP00000360913.3|ENSP00000379502.4|ENSP00000360909.3|ENSP00000474844.1|ENSP00000360907.1|ENSP00000474642.1	ENSG00000132122	248.957	0.522654	0.105821	4.93906	7.85e-07	9.65e-06	ENSG00000132122.11	chr1	48295372	48472208	-	SPATA6	protein_coding	HAVANA|ENSEMBL	48298716	48472008	ENSP00000360913.3|ENSP00000379502.4|ENSP00000360909.3|ENSP00000474844.1|ENSP00000360907.1|ENSP00000474642.1	ENSG00000132122
CTD-2653B5.1	ENSG00000264754	11.6774	-0.348391	0.131475	-2.64987	0.00805216	0.0197083	ENSG00000264754.1	chr17	67524481	67525422	+	sense_intronic	HAVANA	NA	NA		ENSG00000264754	11.2399	0.57834	0.216346	2.67321	0.00751283	0.0329833	ENSG00000264754.1	chr17	67524481	67525422	+	CTD-2653B5.1	sense_intronic	HAVANA	NA	NA		ENSG00000264754
MCAM	ENSG00000076706	735.295	-0.388892	0.147544	-2.63577	0.00839458	0.020456	ENSG00000076706.14	chr11	119308529	119321521	-	protein_coding	HAVANA	119309889	119317101	ENSP00000264036.4	ENSG00000076706	702.964	1.07134	0.182159	5.88132	4.07e-09	7.3e-08	ENSG00000076706.14	chr11	119308529	119321521	-	MCAM	protein_coding	HAVANA	119309889	119317101	ENSP00000264036.4	ENSG00000076706
HIF3A	ENSG00000124440	314.897	-0.413667	0.157292	-2.62993	0.00854016	0.0207821	ENSG00000124440.15	chr19	46297046	46343433	+	protein_coding	HAVANA	46297077	46339619	ENSP00000432809.1|ENSP00000366898.3|ENSP00000244303.6|ENSP00000435532.1|ENSP00000435200.1|ENSP00000434653.2|ENSP00000432613.1|ENSP00000300862.3|ENSP00000469031.1|ENSP00000471560.1|ENSP00000434700.1	ENSG00000124440	298.886	1.27381	0.223643	5.69576	1.23e-08	2.04e-07	ENSG00000124440.15	chr19	46297046	46343433	+	HIF3A	protein_coding	HAVANA	46297077	46339619	ENSP00000432809.1|ENSP00000366898.3|ENSP00000244303.6|ENSP00000435532.1|ENSP00000435200.1|ENSP00000434653.2|ENSP00000432613.1|ENSP00000300862.3|ENSP00000469031.1|ENSP00000471560.1|ENSP00000434700.1	ENSG00000124440
NDEL1	ENSG00000166579	630.08	-0.131814	0.0503151	-2.61977	0.00879885	0.021353	ENSG00000166579.15	chr17	8413131	8490411	+	protein_coding	HAVANA	8444272	8490411	ENSP00000462052.1|ENSP00000464154.1|ENSP00000463430.1|ENSP00000333982.7|ENSP00000463492.1|ENSP00000369364.4|ENSP00000384963.3|ENSP00000462458.1|ENSP00000462759.1|ENSP00000463351.1|ENSP00000464441.1|ENSP00000464634.1	ENSG00000166579	639.505	0.238637	0.0738958	3.22937	0.00124064	0.0071607	ENSG00000166579.15	chr17	8413131	8490411	+	NDEL1	protein_coding	HAVANA	8444272	8490411	ENSP00000462052.1|ENSP00000464154.1|ENSP00000463430.1|ENSP00000333982.7|ENSP00000463492.1|ENSP00000369364.4|ENSP00000384963.3|ENSP00000462458.1|ENSP00000462759.1|ENSP00000463351.1|ENSP00000464441.1|ENSP00000464634.1	ENSG00000166579
RP1-34H18.1	ENSG00000231121	21.1793	-0.321473	0.12328	-2.60767	0.00911602	0.022049	ENSG00000231121.3	chr12	77324641	77572275	+	lincRNA	HAVANA	NA	NA		ENSG00000231121	20.6045	0.505447	0.193204	2.61614	0.0088931	0.0379448	ENSG00000231121.3	chr12	77324641	77572275	+	RP1-34H18.1	lincRNA	HAVANA	NA	NA		ENSG00000231121
DLL1	ENSG00000198719	176.216	-0.262261	0.101387	-2.58672	0.00968939	0.0233301	ENSG00000198719.8	chr6	170282206	170306565	-	protein_coding	HAVANA	170282877	170290139	ENSP00000355718.3|ENSP00000486351.1	ENSG00000198719	173.736	0.707372	0.147916	4.78224	1.73e-06	2.01e-05	ENSG00000198719.8	chr6	170282206	170306565	-	DLL1	protein_coding	HAVANA	170282877	170290139	ENSP00000355718.3|ENSP00000486351.1	ENSG00000198719
RP11-736K20.4	ENSG00000280339	123.96	-0.260894	0.100944	-2.58454	0.00975088	0.0234679	ENSG00000280339.1	chr11	86908990	86912238	-	TEC	HAVANA	NA	NA		ENSG00000280339	121.949	0.40276	0.129651	3.10651	0.00189313	0.0102978	ENSG00000280339.1	chr11	86908990	86912238	-	RP11-736K20.4	TEC	HAVANA	NA	NA		ENSG00000280339
APOLD1	ENSG00000178878	411.553	-0.335143	0.129674	-2.5845	0.00975208	0.0234695	ENSG00000178878.12	chr12	12725917	12829975	+	protein_coding	HAVANA	12726001	12787649	ENSP00000454511.1|ENSP00000456719.1|ENSP00000324277.6|ENSP00000348998.4	ENSG00000178878	398.318	0.537299	0.159653	3.36543	0.000764244	0.00471349	ENSG00000178878.12	chr12	12725917	12829975	+	APOLD1	protein_coding	HAVANA	12726001	12787649	ENSP00000454511.1|ENSP00000456719.1|ENSP00000324277.6|ENSP00000348998.4	ENSG00000178878
KIAA1614	ENSG00000135835	138.253	-0.244929	0.0948235	-2.583	0.00979467	0.0235631	ENSG00000135835.10	chr1	180913154	180951614	+	protein_coding	HAVANA	180913244	180945585	ENSP00000356560.4|ENSP00000356559.1	ENSG00000135835	136.512	0.58084	0.132299	4.39036	1.13e-05	0.000112098	ENSG00000135835.10	chr1	180913154	180951614	+	KIAA1614	protein_coding	HAVANA	180913244	180945585	ENSP00000356560.4|ENSP00000356559.1	ENSG00000135835
DENND2C	ENSG00000175984	126.571	-0.243056	0.0945407	-2.57091	0.0101431	0.0243234	ENSG00000175984.14	chr1	114582848	114670422	-	protein_coding	HAVANA|ENSEMBL	114585603	114625984	ENSP00000376957.3|ENSP00000376955.1|ENSP00000376958.2	ENSG00000175984	125.109	0.312465	0.124612	2.50751	0.0121586	0.0489362	ENSG00000175984.14	chr1	114582848	114670422	-	DENND2C	protein_coding	HAVANA|ENSEMBL	114585603	114625984	ENSP00000376957.3|ENSP00000376955.1|ENSP00000376958.2	ENSG00000175984
RUFY3	ENSG00000018189	946.144	-0.156889	0.0610637	-2.56927	0.0101914	0.02443	ENSG00000018189.12	chr4	70704204	70807315	+	protein_coding	HAVANA	70704937	70806656	ENSP00000426165.1|ENSP00000426734.1|ENSP00000399771.2|ENSP00000370394.3|ENSP00000226328.4|ENSP00000425574.1|ENSP00000425400.1|ENSP00000421120.2|ENSP00000420980.1	ENSG00000018189	955.448	0.432167	0.0821439	5.2611	1.43e-07	1.99e-06	ENSG00000018189.12	chr4	70704204	70807315	+	RUFY3	protein_coding	HAVANA	70704937	70806656	ENSP00000426165.1|ENSP00000426734.1|ENSP00000399771.2|ENSP00000370394.3|ENSP00000226328.4|ENSP00000425574.1|ENSP00000425400.1|ENSP00000421120.2|ENSP00000420980.1	ENSG00000018189
ACSF2	ENSG00000167107	201.594	-0.254376	0.0993028	-2.56162	0.0104184	0.0249255	ENSG00000167107.12	chr17	50426158	50474845	+	protein_coding	HAVANA	50426262	50474549	ENSP00000425332.1|ENSP00000300441.4|ENSP00000426730.1|ENSP00000424842.1|ENSP00000425964.1|ENSP00000401831.2|ENSP00000421884.1|ENSP00000422546.1|ENSP00000421558.1	ENSG00000167107	198.911	0.591869	0.159389	3.71337	0.000204521	0.00149967	ENSG00000167107.12	chr17	50426158	50474845	+	ACSF2	protein_coding	HAVANA	50426262	50474549	ENSP00000425332.1|ENSP00000300441.4|ENSP00000426730.1|ENSP00000424842.1|ENSP00000425964.1|ENSP00000401831.2|ENSP00000421884.1|ENSP00000422546.1|ENSP00000421558.1	ENSG00000167107
RP11-157K17.5	ENSG00000179038	50.8004	-0.20771	0.081434	-2.55065	0.0107521	0.0256671	ENSG00000179038.8	chr11	67195569	67197167	-	transcribed_processed_pseudogene	HAVANA	NA	NA		ENSG00000179038	50.542	0.361809	0.124523	2.90556	0.00366594	0.0180421	ENSG00000179038.8	chr11	67195569	67197167	-	RP11-157K17.5	transcribed_processed_pseudogene	HAVANA	NA	NA		ENSG00000179038
RP11-154F14.2	ENSG00000248629	11.8907	-0.337017	0.132376	-2.5459	0.0108995	0.0259895	ENSG00000248629.1	chr4	156841359	156842236	+	antisense	HAVANA	NA	NA		ENSG00000248629	11.5455	0.608362	0.199693	3.04648	0.00231535	0.0122019	ENSG00000248629.1	chr4	156841359	156842236	+	RP11-154F14.2	antisense	HAVANA	NA	NA		ENSG00000248629
PALMD	ENSG00000099260	340.624	-0.315669	0.124114	-2.54338	0.0109787	0.0261502	ENSG00000099260.10	chr1	99645943	99694541	+	protein_coding	HAVANA|ENSEMBL	99646318	99694059	ENSP00000263174.4|ENSP00000473839.1|ENSP00000479820.1	ENSG00000099260	331.119	0.669641	0.129282	5.17969	2.22e-07	3e-06	ENSG00000099260.10	chr1	99645943	99694541	+	PALMD	protein_coding	HAVANA|ENSEMBL	99646318	99694059	ENSP00000263174.4|ENSP00000473839.1|ENSP00000479820.1	ENSG00000099260
ITGA8	ENSG00000077943	887.469	-0.405924	0.159841	-2.53955	0.0110996	0.0264083	ENSG00000077943.7	chr10	15513949	15720125	-	protein_coding	HAVANA	15517161	15719771	ENSP00000367316.3	ENSG00000077943	844.901	1.25824	0.222713	5.64961	1.61e-08	2.63e-07	ENSG00000077943.7	chr10	15513949	15720125	-	ITGA8	protein_coding	HAVANA	15517161	15719771	ENSP00000367316.3	ENSG00000077943
RP5-1054A22.4	ENSG00000277829	19.7374	-0.320494	0.126671	-2.53012	0.0114024	0.02703	ENSG00000277829.1	chr20	38233251	38233799	-	sense_intronic	HAVANA	NA	NA		ENSG00000277829	19.213	0.882662	0.19124	4.61546	3.92e-06	4.26e-05	ENSG00000277829.1	chr20	38233251	38233799	-	RP5-1054A22.4	sense_intronic	HAVANA	NA	NA		ENSG00000277829
EIF5A2	ENSG00000163577	64.7308	-0.171982	0.068121	-2.52466	0.011581	0.0274079	ENSG00000163577.7	chr3	170888415	170908693	-	protein_coding	HAVANA	170893363	170907806	ENSP00000295822.2|ENSP00000418305.1|ENSP00000418370.1|ENSP00000417133.1	ENSG00000163577	64.9229	0.370815	0.0971957	3.81514	0.000136106	0.0010466	ENSG00000163577.7	chr3	170888415	170908693	-	EIF5A2	protein_coding	HAVANA	170893363	170907806	ENSP00000295822.2|ENSP00000418305.1|ENSP00000418370.1|ENSP00000417133.1	ENSG00000163577
CDS2	ENSG00000101290	974.616	-0.126166	0.0500508	-2.52076	0.0117102	0.0276989	ENSG00000101290.13	chr20	5126786	5197887	+	protein_coding	HAVANA	5127093	5190231	ENSP00000419879.1|ENSP00000403205.1	ENSG00000101290	990.092	0.24727	0.0698879	3.53809	0.000403031	0.00272143	ENSG00000101290.13	chr20	5126786	5197887	+	CDS2	protein_coding	HAVANA	5127093	5190231	ENSP00000419879.1|ENSP00000403205.1	ENSG00000101290
ADCY9	ENSG00000162104	357.281	-0.161616	0.064157	-2.51907	0.0117666	0.0278114	ENSG00000162104.9	chr16	3953387	4116185	-	protein_coding	HAVANA	3953441	4115442	ENSP00000460066.1|ENSP00000294016.3|ENSP00000460160.1|ENSP00000461825.1	ENSG00000162104	359.528	0.382633	0.0822303	4.65319	3.27e-06	3.61e-05	ENSG00000162104.9	chr16	3953387	4116185	-	ADCY9	protein_coding	HAVANA	3953441	4115442	ENSP00000460066.1|ENSP00000294016.3|ENSP00000460160.1|ENSP00000461825.1	ENSG00000162104
TRAF3IP2	ENSG00000056972	269.752	-0.166608	0.0662276	-2.51569	0.0118801	0.0280587	ENSG00000056972.18	chr6	111556454	111606278	-	protein_coding	HAVANA|ENSEMBL	111559408	111601214	ENSP00000357750.5|ENSP00000352889.4|ENSP00000345984.6|ENSP00000376339.5|ENSP00000357724.1	ENSG00000056972	271.788	0.491529	0.102466	4.797	1.61e-06	1.88e-05	ENSG00000056972.18	chr6	111556454	111606278	-	TRAF3IP2	protein_coding	HAVANA|ENSEMBL	111559408	111601214	ENSP00000357750.5|ENSP00000352889.4|ENSP00000345984.6|ENSP00000376339.5|ENSP00000357724.1	ENSG00000056972
MAPKBP1	ENSG00000137802	365.418	-0.134357	0.0534655	-2.51297	0.0119719	0.0282545	ENSG00000137802.13	chr15	41774434	41827855	+	protein_coding	HAVANA|ENSEMBL	41775276	41825433	ENSP00000427582.1|ENSP00000397570.2|ENSP00000421891.1|ENSP00000393099.2|ENSP00000426154.1|ENSP00000422132.1|ENSP00000487189.1	ENSG00000137802	370.558	0.321928	0.0815478	3.94773	7.89e-05	0.000643691	ENSG00000137802.13	chr15	41774434	41827855	+	MAPKBP1	protein_coding	HAVANA|ENSEMBL	41775276	41825433	ENSP00000427582.1|ENSP00000397570.2|ENSP00000421891.1|ENSP00000393099.2|ENSP00000426154.1|ENSP00000422132.1|ENSP00000487189.1	ENSG00000137802
MAMDC2-AS1	ENSG00000204706	151.876	-0.344541	0.137149	-2.51216	0.0119994	0.0283088	ENSG00000204706.14	chr9	70033921	70175888	-	antisense	HAVANA	NA	NA		ENSG00000204706	146.458	0.779795	0.176482	4.41854	9.94e-06	9.94e-05	ENSG00000204706.14	chr9	70033921	70175888	-	MAMDC2-AS1	antisense	HAVANA	NA	NA		ENSG00000204706
RARA	ENSG00000131759	200.485	-0.183662	0.0731406	-2.51108	0.0120363	0.0283899	ENSG00000131759.17	chr17	40309192	40357643	+	protein_coding	HAVANA	40331219	40356223	ENSP00000464287.1|ENSP00000254066.5|ENSP00000377649.2|ENSP00000389993.3|ENSP00000377648.3|ENSP00000377643.3|ENSP00000462514.1	ENSG00000131759	201.019	0.528401	0.107607	4.91049	9.09e-07	1.1e-05	ENSG00000131759.17	chr17	40309192	40357643	+	RARA	protein_coding	HAVANA	40331219	40356223	ENSP00000464287.1|ENSP00000254066.5|ENSP00000377649.2|ENSP00000389993.3|ENSP00000377648.3|ENSP00000377643.3|ENSP00000462514.1	ENSG00000131759
AC092839.4	ENSG00000234943	22.1526	-0.311741	0.124416	-2.50564	0.0122231	0.0287982	ENSG00000234943.2	chr2	54545368	54546677	-	antisense	HAVANA	NA	NA		ENSG00000234943	21.4903	0.708008	0.182531	3.87883	0.00010496	0.000831144	ENSG00000234943.2	chr2	54545368	54546677	-	AC092839.4	antisense	HAVANA	NA	NA		ENSG00000234943
WSB1	ENSG00000109046	2254.55	-0.18258	0.0730358	-2.49987	0.0124238	0.0292416	ENSG00000109046.14	chr17	27294076	27315926	+	protein_coding	HAVANA	27294396	27312366	ENSP00000462737.1|ENSP00000262394.2|ENSP00000462365.1|ENSP00000461991.1|ENSP00000462595.1|ENSP00000464109.1|ENSP00000416112.2|ENSP00000327055.2|ENSP00000463621.1|ENSP00000462900.1	ENSG00000109046	2262.52	0.400533	0.097027	4.12806	3.66e-05	0.000322696	ENSG00000109046.14	chr17	27294076	27315926	+	WSB1	protein_coding	HAVANA	27294396	27312366	ENSP00000462737.1|ENSP00000262394.2|ENSP00000462365.1|ENSP00000461991.1|ENSP00000462595.1|ENSP00000464109.1|ENSP00000416112.2|ENSP00000327055.2|ENSP00000463621.1|ENSP00000462900.1	ENSG00000109046
LAYN	ENSG00000204381	99.3094	-0.204266	0.082612	-2.4726	0.0134134	0.0313823	ENSG00000204381.11	chr11	111540280	111561745	+	protein_coding	HAVANA|ENSEMBL	111540844	111560455	ENSP00000432434.1|ENSP00000364764.2|ENSP00000392942.2|ENSP00000364765.3|ENSP00000434328.1|ENSP00000434300.1|ENSP00000434972.1|ENSP00000431627.1|ENSP00000486561.1	ENSG00000204381	99.1404	0.508312	0.123444	4.11776	3.83e-05	0.000335926	ENSG00000204381.11	chr11	111540280	111561745	+	LAYN	protein_coding	HAVANA|ENSEMBL	111540844	111560455	ENSP00000432434.1|ENSP00000364764.2|ENSP00000392942.2|ENSP00000364765.3|ENSP00000434328.1|ENSP00000434300.1|ENSP00000434972.1|ENSP00000431627.1|ENSP00000486561.1	ENSG00000204381
PLBD1	ENSG00000121316	96.2561	-0.232897	0.0946397	-2.46088	0.0138597	0.0323188	ENSG00000121316.10	chr12	14503661	14568349	-	protein_coding	HAVANA	14503775	14567696	ENSP00000240617.5|ENSP00000441278.1|ENSP00000438367.1	ENSG00000121316	95.534	0.480217	0.150362	3.19373	0.00140449	0.00796354	ENSG00000121316.10	chr12	14503661	14568349	-	PLBD1	protein_coding	HAVANA	14503775	14567696	ENSP00000240617.5|ENSP00000441278.1|ENSP00000438367.1	ENSG00000121316
KLF10	ENSG00000155090	383.195	-0.32117	0.130982	-2.45201	0.0142062	0.0330528	ENSG00000155090.14	chr8	102648779	102655902	-	protein_coding	HAVANA	102650135	102655601	ENSP00000285407.6|ENSP00000379222.3	ENSG00000155090	372.502	0.679172	0.182088	3.72992	0.00019154	0.00141503	ENSG00000155090.14	chr8	102648779	102655902	-	KLF10	protein_coding	HAVANA	102650135	102655601	ENSP00000285407.6|ENSP00000379222.3	ENSG00000155090
ITPK1-AS1	ENSG00000258730	96.9217	-0.158839	0.0649228	-2.44658	0.014422	0.0335031	ENSG00000258730.1	chr14	93067452	93072152	+	antisense	HAVANA	NA	NA		ENSG00000258730	97.9408	0.302686	0.0932277	3.24674	0.00116736	0.00680098	ENSG00000258730.1	chr14	93067452	93072152	+	ITPK1-AS1	antisense	HAVANA	NA	NA		ENSG00000258730
LARGE-AS1	ENSG00000224973	107.947	-0.239441	0.0985031	-2.4308	0.0150657	0.0348431	ENSG00000224973.5	chr22	33725014	33750843	+	processed_transcript	HAVANA	NA	NA		ENSG00000224973	106.946	0.576256	0.14457	3.98599	6.72e-05	0.000557642	ENSG00000224973.5	chr22	33725014	33750843	+	LARGE-AS1	processed_transcript	HAVANA	NA	NA		ENSG00000224973
LEPROT	ENSG00000213625	493.196	-0.156406	0.0644412	-2.42711	0.0152196	0.0351586	ENSG00000213625.8	chr1	65420587	65436007	+	protein_coding	HAVANA|ENSEMBL	65420725	65431916	ENSP00000360104.4|ENSP00000483521.1	ENSG00000213625	497.679	0.343429	0.0930844	3.68944	0.000224748	0.00162778	ENSG00000213625.8	chr1	65420587	65436007	+	LEPROT	protein_coding	HAVANA|ENSEMBL	65420725	65431916	ENSP00000360104.4|ENSP00000483521.1	ENSG00000213625
NR2F2	ENSG00000185551	1402.22	-0.206347	0.0851335	-2.4238	0.0153589	0.0354358	ENSG00000185551.12	chr15	96325938	96340263	+	protein_coding	HAVANA|ENSEMBL	96326310	96337619	ENSP00000401674.2|ENSP00000377721.3|ENSP00000457112.1|ENSP00000377726.2|ENSP00000389853.2	ENSG00000185551	1399.46	0.429052	0.111809	3.83737	0.000124359	0.000965253	ENSG00000185551.12	chr15	96325938	96340263	+	NR2F2	protein_coding	HAVANA|ENSEMBL	96326310	96337619	ENSP00000401674.2|ENSP00000377721.3|ENSP00000457112.1|ENSP00000377726.2|ENSP00000389853.2	ENSG00000185551
RP11-736K20.5	ENSG00000255471	79.4797	-0.251706	0.104001	-2.42022	0.0155111	0.035748	ENSG00000255471.1	chr11	86892214	86925037	-	antisense	HAVANA	NA	NA		ENSG00000255471	78.4458	0.357417	0.126867	2.81727	0.00484343	0.0228324	ENSG00000255471.1	chr11	86892214	86925037	-	RP11-736K20.5	antisense	HAVANA	NA	NA		ENSG00000255471
FER	ENSG00000151422	625.538	-0.155866	0.0646001	-2.41278	0.0158315	0.0364239	ENSG00000151422.12	chr5	108747822	109196841	+	protein_coding	HAVANA|ENSEMBL	108798183	109187572	ENSP00000281092.4|ENSP00000421951.2|ENSP00000486048.1|ENSP00000394297.4|ENSP00000484767.1	ENSG00000151422	631.322	0.514492	0.085652	6.00677	1.89e-09	3.58e-08	ENSG00000151422.12	chr5	108747822	109196841	+	FER	protein_coding	HAVANA|ENSEMBL	108798183	109187572	ENSP00000281092.4|ENSP00000421951.2|ENSP00000486048.1|ENSP00000394297.4|ENSP00000484767.1	ENSG00000151422
TLR2	ENSG00000137462	113.063	-0.302128	0.125608	-2.40532	0.0161584	0.0370779	ENSG00000137462.6	chr4	153701500	153705699	+	protein_coding	HAVANA	153702908	153705259	ENSP00000260010.6	ENSG00000137462	110.492	0.582182	0.200836	2.89879	0.00374607	0.0183833	ENSG00000137462.6	chr4	153701500	153705699	+	TLR2	protein_coding	HAVANA	153702908	153705259	ENSP00000260010.6	ENSG00000137462
RILPL2	ENSG00000150977	254.356	-0.131693	0.0547887	-2.40366	0.0162319	0.037235	ENSG00000150977.10	chr12	123410683	123436717	-	protein_coding	HAVANA	123415894	123436420	ENSP00000280571.8	ENSG00000150977	257.721	0.345024	0.084417	4.08714	4.37e-05	0.000378587	ENSG00000150977.10	chr12	123410683	123436717	-	RILPL2	protein_coding	HAVANA	123415894	123436420	ENSP00000280571.8	ENSG00000150977
CTD-2373H9.3	ENSG00000279339	95.3519	-0.208785	0.0870832	-2.39753	0.016506	0.0378011	ENSG00000279339.1	chr17	78897264	78900152	+	TEC	HAVANA	NA	NA		ENSG00000279339	94.8469	0.760308	0.116182	6.54409	5.99e-11	1.4e-09	ENSG00000279339.1	chr17	78897264	78900152	+	CTD-2373H9.3	TEC	HAVANA	NA	NA		ENSG00000279339
RMDN2	ENSG00000115841	114.772	-0.154784	0.0647953	-2.38881	0.0169029	0.0386282	ENSG00000115841.19	chr2	37923187	38067142	+	protein_coding	HAVANA|ENSEMBL	37929278	38066987	ENSP00000393705.1|ENSP00000346549.2|ENSP00000399495.1|ENSP00000386004.1|ENSP00000385049.1|ENSP00000392977.2|ENSP00000234195.3|ENSP00000416367.1|ENSP00000385529.3|ENSP00000406331.1	ENSG00000115841	115.54	0.334391	0.0867839	3.85315	0.000116609	0.000912458	ENSG00000115841.19	chr2	37923187	38067142	+	RMDN2	protein_coding	HAVANA|ENSEMBL	37929278	38066987	ENSP00000393705.1|ENSP00000346549.2|ENSP00000399495.1|ENSP00000386004.1|ENSP00000385049.1|ENSP00000392977.2|ENSP00000234195.3|ENSP00000416367.1|ENSP00000385529.3|ENSP00000406331.1	ENSG00000115841
RP11-416N2.4	ENSG00000273108	48.5797	-0.228561	0.0958236	-2.38523	0.0170687	0.0389747	ENSG00000273108.1	chr10	103608619	103610050	+	antisense	HAVANA	NA	NA		ENSG00000273108	48.1303	0.607322	0.143612	4.2289	2.35e-05	0.00021641	ENSG00000273108.1	chr10	103608619	103610050	+	RP11-416N2.4	antisense	HAVANA	NA	NA		ENSG00000273108
NUAK1	ENSG00000074590	225.736	-0.21346	0.0895071	-2.38484	0.0170864	0.0390071	ENSG00000074590.13	chr12	106063340	106140033	-	protein_coding	HAVANA	106066805	106138653	ENSP00000261402.2|ENSP00000446873.1|ENSP00000449990.1|ENSP00000448288.1	ENSG00000074590	224.598	0.608994	0.0991215	6.14391	8.05e-10	1.61e-08	ENSG00000074590.13	chr12	106063340	106140033	-	NUAK1	protein_coding	HAVANA	106066805	106138653	ENSP00000261402.2|ENSP00000446873.1|ENSP00000449990.1|ENSP00000448288.1	ENSG00000074590
BACE1-AS	ENSG00000278768	30.133	-0.177921	0.0754109	-2.35935	0.0183071	0.0415051	ENSG00000278768.1	chr11	117290874	117293571	+	antisense	HAVANA	NA	NA		ENSG00000278768	30.1488	0.333526	0.113619	2.93549	0.00333026	0.0166059	ENSG00000278768.1	chr11	117290874	117293571	+	BACE1-AS	antisense	HAVANA	NA	NA		ENSG00000278768
MAGI2-IT1	ENSG00000235751	8.05923	-0.397048	0.170111	-2.33406	0.0195928	0.0440368	ENSG00000235751.3	chr7	78901275	79000298	-	sense_intronic	HAVANA	NA	NA		ENSG00000235751	7.72424	0.880317	0.247335	3.55921	0.000371967	0.00253459	ENSG00000235751.3	chr7	78901275	79000298	-	MAGI2-IT1	sense_intronic	HAVANA	NA	NA		ENSG00000235751
DAPK2	ENSG00000035664	239.677	-0.223633	0.0960628	-2.32798	0.0199131	0.0446931	ENSG00000035664.11	chr15	63907036	64072033	-	protein_coding	HAVANA|ENSEMBL	63908523	64040261	ENSP00000453639.1|ENSP00000261891.3|ENSP00000408277.1|ENSP00000453101.1|ENSP00000484390.1|ENSP00000453235.1|ENSP00000453284.1|ENSP00000452970.1	ENSG00000035664	237.92	0.414654	0.143317	2.89325	0.00381272	0.0186587	ENSG00000035664.11	chr15	63907036	64072033	-	DAPK2	protein_coding	HAVANA|ENSEMBL	63908523	64040261	ENSP00000453639.1|ENSP00000261891.3|ENSP00000408277.1|ENSP00000453101.1|ENSP00000484390.1|ENSP00000453235.1|ENSP00000453284.1|ENSP00000452970.1	ENSG00000035664
RP11-266K4.13	ENSG00000276417	13.2946	-0.327169	0.141342	-2.31473	0.0206276	0.0461495	ENSG00000276417.1	chr12	8205984	8207397	+	lincRNA	HAVANA	NA	NA		ENSG00000276417	12.7183	0.949043	0.215054	4.41305	1.02e-05	0.000101763	ENSG00000276417.1	chr12	8205984	8207397	+	RP11-266K4.13	lincRNA	HAVANA	NA	NA		ENSG00000276417
RP11-88I18.3	ENSG00000229019	28.2917	-0.36407	0.158121	-2.30248	0.0213079	0.0475066	ENSG00000229019.1	chr9	68426843	68429369	+	sense_intronic	HAVANA	NA	NA		ENSG00000229019	27.1001	1.48372	0.222788	6.65978	2.74e-11	6.68e-10	ENSG00000229019.1	chr9	68426843	68429369	+	RP11-88I18.3	sense_intronic	HAVANA	NA	NA		ENSG00000229019
MIR920	ENSG00000216192	6.00963	-0.391561	0.170185	-2.3008	0.0214032	0.0476956	ENSG00000216192.1	chr12	24212421	24212495	+	miRNA	ENSEMBL	NA	NA		ENSG00000216192	5.66359	0.784174	0.271974	2.88327	0.00393569	0.0191821	ENSG00000216192.1	chr12	24212421	24212495	+	MIR920	miRNA	ENSEMBL	NA	NA		ENSG00000216192
COX7A1	ENSG00000161281	73.8466	-0.225664	0.0981384	-2.29945	0.0214796	0.0478405	ENSG00000161281.10	chr19	36150922	36152869	-	protein_coding	HAVANA	36150985	36152407	ENSP00000475885.1|ENSP00000292907.3|ENSP00000468063.3	ENSG00000161281	73.2192	0.713337	0.11368	6.27495	3.5e-10	7.34e-09	ENSG00000161281.10	chr19	36150922	36152869	-	COX7A1	protein_coding	HAVANA	36150985	36152407	ENSP00000475885.1|ENSP00000292907.3|ENSP00000468063.3	ENSG00000161281
RP4-535B20.4	ENSG00000272506	42.0911	-0.221054	0.096235	-2.29703	0.0216172	0.0481107	ENSG00000272506.1	chr1	65003470	65004087	-	lincRNA	HAVANA	NA	NA		ENSG00000272506	41.5886	0.621342	0.139909	4.44104	8.95e-06	9.06e-05	ENSG00000272506.1	chr1	65003470	65004087	-	RP4-535B20.4	lincRNA	HAVANA	NA	NA		ENSG00000272506
SFXN3	ENSG00000107819	326.655	-0.191508	0.0834549	-2.29475	0.0217476	0.0483694	ENSG00000107819.13	chr10	101031234	101041244	+	protein_coding	HAVANA|ENSEMBL	101032474	101039582	ENSP00000377103.1|ENSP00000224807.5|ENSP00000474564.1	ENSG00000107819	327.148	0.625457	0.128059	4.88412	1.04e-06	1.25e-05	ENSG00000107819.13	chr10	101031234	101041244	+	SFXN3	protein_coding	HAVANA|ENSEMBL	101032474	101039582	ENSP00000377103.1|ENSP00000224807.5|ENSP00000474564.1	ENSG00000107819
RNF112	ENSG00000128482	76.6244	-0.43982	0.191788	-2.29326	0.0218331	0.0485328	ENSG00000128482.15	chr17	19411125	19417276	+	protein_coding	HAVANA	19411409	19416172	ENSP00000464134.1|ENSP00000454919.1	ENSG00000128482	72.2174	0.986505	0.253388	3.89327	9.89e-05	0.000788824	ENSG00000128482.15	chr17	19411125	19417276	+	RNF112	protein_coding	HAVANA	19411409	19416172	ENSP00000464134.1|ENSP00000454919.1	ENSG00000128482
WDR1	ENSG00000071127	1687.96	-0.161541	0.0706333	-2.28704	0.0221933	0.0492642	ENSG00000071127.16	chr4	10074339	10116949	-	protein_coding	HAVANA|ENSEMBL	10075381	10116666	ENSP00000427687.1|ENSP00000371889.2|ENSP00000371890.2|ENSP00000426725.1|ENSP00000425481.1	ENSG00000071127	1702.73	0.352675	0.103682	3.40151	0.000670141	0.00420753	ENSG00000071127.16	chr4	10074339	10116949	-	WDR1	protein_coding	HAVANA|ENSEMBL	10075381	10116666	ENSP00000427687.1|ENSP00000371889.2|ENSP00000371890.2|ENSP00000426725.1|ENSP00000425481.1	ENSG00000071127
