# Supplementary material for: Integrated Genomic Analysis of Primary Prostate Tumor Foci and Corresponding Lymph Node Metastases Identifies Mutations and Pathways Associated with Metastasis
Source: Preprints.org preprint supplement (doi:10.20944/preprints202310.1586.v1), 2023-10-25
Supplement: Supplementary file 10 [file Table_S8_GSEA_AA.PTF.G7.vs.W.PTF.G7.xlsx]

## Sheet: Table_S8_GSEA_AA.PTF.G7.vs.W.PT
geneSet	description	link	enrichmentScore	normalizedEnrichmentScore	pValue	FDR	size	leadingEdgeNum	leadingEdgeId	userId
HALLMARK_INTERFERON_ALPHA_RESPONSE	interferon alpha response	http://www.broadinstitute.org/gsea/msigdb/cards/HALLMARK_INTERFERON_ALPHA_RESPONSE	0.506904	2.18132	0	0	97	48	4599;3959;8519;7318;4061;27074;219285;55281;94240;55603;834;3660;23424;3665;9636;6737;2634;115361;10964;3433;8767;716;5720;5721;10906;6773;7706;4343;81894;54809;85363;1435;103;91543;3437;64135;55072;3430;51667;55601;64761;684;64108;23070;10628;85441;93343;10410	ENSG00000013374;ENSG00000059378;ENSG00000068079;ENSG00000078081;ENSG00000092010;ENSG00000092098;ENSG00000100911;ENSG00000104312;ENSG00000108679;ENSG00000112773;ENSG00000115267;ENSG00000119917;ENSG00000119922;ENSG00000121060;ENSG00000130303;ENSG00000130589;ENSG00000132109;ENSG00000132256;ENSG00000133106;ENSG00000134321;ENSG00000135148;ENSG00000136514;ENSG00000137200;ENSG00000137628;ENSG00000137752…
HALLMARK_UV_RESPONSE_DN	UV response: downregulated genes	http://www.broadinstitute.org/gsea/msigdb/cards/HALLMARK_UV_RESPONSE_DN	0.466657	2.15522	0	0	144	63	307;8821;9975;1628;5737;2202;10516;10370;92;1290;2064;6256;5577;1432;4233;4493;120;57178;6541;3397;1281;9112;23116;1278;7048;1277;10240;5578;7049;50937;5797;11044;5468;1027;23345;2697;5159;4325;4092;490;5999;4052;594;23266;302;8455;8503;4853;55109;8621;4088;25836;7410;54468;5293;1739;10401;857;5728;8476;5607;140609;2534	ENSG00000005249;ENSG00000010810;ENSG00000049323;ENSG00000064309;ENSG00000065883;ENSG00000069702;ENSG00000070961;ENSG00000075711;ENSG00000083123;ENSG00000088812;ENSG00000101665;ENSG00000102738;ENSG00000105516;ENSG00000105974;ENSG00000105976;ENSG00000108175;ENSG00000108821;ENSG00000109452;ENSG00000111276;ENSG00000112062;ENSG00000112941;ENSG00000113721;ENSG00000115380;ENSG00000117114;ENSG00000117152…
HALLMARK_OXIDATIVE_PHOSPHORYLATION	oxidative phosphorylation and citric acid cycle	http://www.broadinstitute.org/gsea/msigdb/cards/HALLMARK_OXIDATIVE_PHOSPHORYLATION	0.445717	2.12775	0	0	199	93	840;56898;4259;1327;4723;50;30;89941;10312;5447;8802;2230;1632;23479;2879;1537;51606;51382;6389;2806;5160;1347;3421;51660;1892;1528;7384;4722;10128;1329;4724;539;518;3420;1666;529;4712;4713;509;54884;27429;1345;8050;9131;4718;10935;6390;8604;7385;481;29088;29796;4700;10989;1743;64960;34;10884;506;528;4329;10449;2271;10476;513;4976;4697;3418;5264;4714;9868;8803;8402;7417;4191;65003;4719;6834;23530…	ENSG00000004779;ENSG00000010256;ENSG00000014641;ENSG00000023228;ENSG00000023330;ENSG00000042445;ENSG00000047249;ENSG00000060762;ENSG00000060971;ENSG00000067829;ENSG00000072778;ENSG00000073578;ENSG00000075415;ENSG00000091483;ENSG00000099624;ENSG00000099795;ENSG00000100243;ENSG00000100412;ENSG00000100554;ENSG00000101365;ENSG00000104325;ENSG00000107537;ENSG00000108528;ENSG00000110435;ENSG00000110719…
HALLMARK_ADIPOGENESIS	adipocyte development	http://www.broadinstitute.org/gsea/msigdb/cards/HALLMARK_ADIPOGENESIS	0.435153	2.08917	0	0	198	95	134147;54996;7263;7316;1468;83871;1580;4259;1384;50;6510;847;23344;977;5447;6576;4199;2101;2053;8802;7423;26275;57678;2879;6623;5211;1629;65124;4189;1537;3033;5468;8082;10113;3421;4836;8694;1892;7384;5209;4722;6776;226;334;7351;901;10010;539;84522;1666;4713;6453;284;54884;9131;10935;29103;84274;6390;10313;29088;29796;10989;5004;6888;56894;1647;34;217;25979;6647;369;7086;376497;10449;11194;79602;5…	ENSG00000004779;ENSG00000006831;ENSG00000010256;ENSG00000019144;ENSG00000042445;ENSG00000065833;ENSG00000067829;ENSG00000078061;ENSG00000084234;ENSG00000095321;ENSG00000099795;ENSG00000100075;ENSG00000100412;ENSG00000104325;ENSG00000105281;ENSG00000107537;ENSG00000109016;ENSG00000109113;ENSG00000109919;ENSG00000110871;ENSG00000111275;ENSG00000115459;ENSG00000116717;ENSG00000117054;ENSG00000117118…
HALLMARK_ESTROGEN_RESPONSE_LATE	late estrogen response	http://www.broadinstitute.org/gsea/msigdb/cards/HALLMARK_ESTROGEN_RESPONSE_LATE	0.435254	2.08128	0	0	200	85	2261;4192;399665;3880;3993;5618;5603;1152;645;7033;3860;6337;7263;2582;2222;27134;57834;7031;4665;5777;1844;1154;960;445;3705;10105;5577;2171;2852;26509;4681;120;7466;7517;8309;58495;9368;2288;9536;9215;5104;6196;596;6509;51195;64215;9547;22824;771;8204;23650;29107;224;11098;1952;1345;3613;64065;3716;7162;8140;11057;10610;595;10538;3398;3158;3487;3418;10535;51659;2317;857;3717;5932;27250;56339;11…	ENSG00000004478;ENSG00000005249;ENSG00000026508;ENSG00000068078;ENSG00000070731;ENSG00000071242;ENSG00000072210;ENSG00000073350;ENSG00000074410;ENSG00000079459;ENSG00000088002;ENSG00000090013;ENSG00000096968;ENSG00000100605;ENSG00000101773;ENSG00000103257;ENSG00000104267;ENSG00000104889;ENSG00000105289;ENSG00000105974;ENSG00000107562;ENSG00000108179;ENSG00000108352;ENSG00000109062;ENSG00000109501…
HALLMARK_MITOTIC_SPINDLE	cell cycle progression: mitotic spindle assembly	http://www.broadinstitute.org/gsea/msigdb/cards/HALLMARK_MITOTIC_SPINDLE	0.434576	2.0683	0	0	200	81	4983;201176;393;23580;9462;11064;22994;89941;25777;11346;9735;10928;4628;11190;134549;9564;6904;57580;6709;85378;7430;55722;9266;7248;9585;11135;4001;29;4627;983;22920;832;7204;10128;23192;10565;3835;3832;5116;6453;8440;4763;9793;10051;55201;23332;10844;4853;4650;55125;6711;81;1778;667;4082;151987;2017;64411;996;8874;9113;50650;10013;1063;1739;7461;2317;9181;8409;5108;55755;9126;6624;55704;8476;3…	ENSG00000004897;ENSG00000011454;ENSG00000017797;ENSG00000038382;ENSG00000050820;ENSG00000066777;ENSG00000071051;ENSG00000074054;ENSG00000075391;ENSG00000075618;ENSG00000075711;ENSG00000075945;ENSG00000077549;ENSG00000078674;ENSG00000079482;ENSG00000079616;ENSG00000085733;ENSG00000089820;ENSG00000092820;ENSG00000094631;ENSG00000099331;ENSG00000100242;ENSG00000100345;ENSG00000101350;ENSG00000101639…
HALLMARK_APICAL_JUNCTION	apical junction complex consisting of adherens and tight junctions	http://www.broadinstitute.org/gsea/msigdb/cards/HALLMARK_APICAL_JUNCTION	0.43218	2.05127	0	0	197	98	4192;7106;5603;2593;10458;1272;51466;71;3673;2886;3914;1307;6714;5310;1462;1384;6850;24146;1825;81607;1432;4628;54413;147;92359;51148;3691;253559;1265;7185;57463;3033;5871;10205;7070;7248;4597;8751;26119;6810;4627;1364;84552;11096;23114;9353;3265;5747;4763;1001;5291;5880;7122;8503;5788;10487;6376;81;6237;1366;2533;4902;7410;51474;3757;60412;2200;3728;5335;247;7059;1739;208;4313;5818;8449;5728;662…	ENSG00000005884;ENSG00000006210;ENSG00000008710;ENSG00000018236;ENSG00000038427;ENSG00000044115;ENSG00000050405;ENSG00000051382;ENSG00000055118;ENSG00000056558;ENSG00000062038;ENSG00000064666;ENSG00000072110;ENSG00000075618;ENSG00000075624;ENSG00000075711;ENSG00000081237;ENSG00000082074;ENSG00000084636;ENSG00000087245;ENSG00000095321;ENSG00000100345;ENSG00000103496;ENSG00000105221;ENSG00000106404…
HALLMARK_P53_PATHWAY	p53 pathway	http://www.broadinstitute.org/gsea/msigdb/cards/HALLMARK_P53_PATHWAY	0.428283	2.04941	0	0	200	88	64787;1649;3006;10458;6382;5429;975;5111;8722;1643;6256;1050;3275;6275;56997;834;4013;64393;26355;57761;23479;55602;55240;3691;6281;3732;26471;11059;10769;23654;7040;7508;127544;578;5883;29948;57799;5784;10608;317;22824;3714;4851;2877;6141;54541;50619;1969;5268;3265;10614;23612;54884;10906;63874;3725;64065;694;896;894;55367;6667;1647;9618;29946;55270;8626;51768;27244;2232;9635;6520;247;8518;5372;…	ENSG00000023892;ENSG00000026103;ENSG00000030110;ENSG00000042445;ENSG00000063177;ENSG00000064115;ENSG00000068745;ENSG00000070061;ENSG00000073282;ENSG00000076604;ENSG00000080546;ENSG00000085117;ENSG00000099875;ENSG00000100417;ENSG00000100439;ENSG00000101255;ENSG00000105329;ENSG00000108384;ENSG00000110002;ENSG00000110651;ENSG00000112378;ENSG00000112576;ENSG00000114023;ENSG00000115107;ENSG00000115884…
HALLMARK_ESTROGEN_RESPONSE_EARLY	early estrogen response	http://www.broadinstitute.org/gsea/msigdb/cards/HALLMARK_ESTROGEN_RESPONSE_EARLY	0.425839	2.04852	0	0	200	66	399665;3880;645;6513;79754;7033;3860;6337;54898;8800;2222;27134;7031;3898;9145;1154;960;3705;10105;744;23541;26509;54020;4681;120;7466;23052;60436;58495;9368;2288;9536;6196;596;6509;51195;56944;1999;3856;2697;7739;64798;771;8204;9620;10514;79875;29107;23389;84187;375449;11098;5914;1952;115;3983;54463;3875;7162;64919;8140;9094;11057;9249;1366;595	ENSG00000004478;ENSG00000026508;ENSG00000066382;ENSG00000069020;ENSG00000071242;ENSG00000074410;ENSG00000075275;ENSG00000079459;ENSG00000090013;ENSG00000099204;ENSG00000100003;ENSG00000100321;ENSG00000100605;ENSG00000103257;ENSG00000105289;ENSG00000108179;ENSG00000108352;ENSG00000109062;ENSG00000109103;ENSG00000109501;ENSG00000110092;ENSG00000111057;ENSG00000111319;ENSG00000114737;ENSG00000115902…
HALLMARK_DNA_REPAIR	DNA repair	http://www.broadinstitute.org/gsea/msigdb/cards/HALLMARK_DNA_REPAIR	0.42273	1.9305	0	0.000221	149	75	5429;4350;51082;5111;1643;30833;8237;5557;6895;6878;286075;5893;2879;2068;25920;55290;5985;7508;51160;9013;3704;2987;4882;57804;4832;6118;10134;5984;1603;2967;8178;6621;10946;10309;5437;2071;5980;51292;51251;27343;5438;3978;5436;4799;192670;6834;10714;11047;6883;50484;7084;7936;29901;5982;2073;6809;1642;9328;9533;10623;51497;54487;124583;2237;64976;7251;5434;5422;5440;8721;3615;5983;2959;353;10289	ENSG00000002016;ENSG00000009413;ENSG00000048392;ENSG00000049541;ENSG00000074319;ENSG00000077514;ENSG00000086102;ENSG00000099817;ENSG00000100938;ENSG00000101158;ENSG00000101868;ENSG00000102226;ENSG00000103024;ENSG00000103152;ENSG00000103168;ENSG00000104221;ENSG00000104884;ENSG00000105258;ENSG00000105486;ENSG00000105656;ENSG00000106290;ENSG00000107223;ENSG00000111358;ENSG00000111445;ENSG00000114784…
HALLMARK_IL6_JAK_STAT3_SIGNALING	IL6 STAT3 signaling during acute phase response	http://www.broadinstitute.org/gsea/msigdb/cards/HALLMARK_IL6_JAK_STAT3_SIGNALING	-0.286739	-1.35619	0.0521173	0.105597	83	21	83729;4283;5320;1437;1439;5196;5292;4050;3553;9021;3594;7850;55540;2919;948;3162;3559;2921;1441;23765;3569	ENSG00000056736;ENSG00000096996;ENSG00000100292;ENSG00000100368;ENSG00000115590;ENSG00000119535;ENSG00000125538;ENSG00000134460;ENSG00000135218;ENSG00000136244;ENSG00000137193;ENSG00000138755;ENSG00000139269;ENSG00000163734;ENSG00000163737;ENSG00000163739;ENSG00000164400;ENSG00000177663;ENSG00000184557;ENSG00000188257;ENSG00000227507
HALLMARK_PANCREAS_BETA_CELLS	genes specific to pancreatic beta cells	http://www.broadinstitute.org/gsea/msigdb/cards/HALLMARK_PANCREAS_BETA_CELLS	-0.343273	-1.37283	0.079096	0.180035	39	21	2645;6812;23478;3375;4821;1641;5080;5063;5078;57818;4825;3651;3642;6514;5313;4760;50674;10590;2641;6833;57586	ENSG00000006071;ENSG00000007372;ENSG00000019505;ENSG00000077264;ENSG00000077279;ENSG00000079689;ENSG00000106331;ENSG00000106633;ENSG00000115263;ENSG00000121351;ENSG00000122859;ENSG00000125820;ENSG00000136854;ENSG00000139515;ENSG00000140612;ENSG00000143627;ENSG00000152254;ENSG00000162992;ENSG00000163581;ENSG00000163623;ENSG00000173404
HALLMARK_SPERMATOGENESIS	sperm development and male fertility	http://www.broadinstitute.org/gsea/msigdb/cards/HALLMARK_SPERMATOGENESIS	-0.2356	-1.18769	0.130137	0.19107	133	49	9063;54514;157807;4291;10047;10880;7142;3416;8852;83445;7180;5620;23175;83401;2918;5443;29118;10038;3306;6954;2571;7141;419;27285;165721;126669;246;116;4543;4889;6447;26330;3211;4956;135138;5232;11144;4842;56903;5161;148066;6558;51087;10693;51686;51298;9053;9133;84779	ENSG00000006047;ENSG00000064651;ENSG00000078043;ENSG00000089250;ENSG00000092850;ENSG00000100206;ENSG00000105428;ENSG00000105549;ENSG00000105679;ENSG00000109832;ENSG00000111305;ENSG00000112530;ENSG00000115138;ENSG00000118245;ENSG00000119912;ENSG00000119915;ENSG00000120094;ENSG00000122304;ENSG00000124490;ENSG00000124678;ENSG00000125815;ENSG00000126803;ENSG00000128683;ENSG00000129484;ENSG00000132141…
HALLMARK_TNFA_SIGNALING_VIA_NFKB	TNFA signaling via NF_B	http://www.broadinstitute.org/gsea/msigdb/cards/HALLMARK_TNFA_SIGNALING_VIA_NFKB	-0.221594	-1.19992	0.0884615	0.231535	200	42	79693;8660;1052;1880;5329;5187;2355;7128;2353;3552;6303;3164;3976;4929;4616;3604;3553;9021;3383;6347;2683;6446;1906;1958;10365;1827;25976;6351;7832;1026;4783;6515;7538;6648;10135;374;2919;7422;2921;2152;3569;2920	ENSG00000011422;ENSG00000049249;ENSG00000059804;ENSG00000075426;ENSG00000078401;ENSG00000081041;ENSG00000086062;ENSG00000090339;ENSG00000099860;ENSG00000105835;ENSG00000108691;ENSG00000109321;ENSG00000112096;ENSG00000112715;ENSG00000115008;ENSG00000117525;ENSG00000118503;ENSG00000118515;ENSG00000120738;ENSG00000123358;ENSG00000124762;ENSG00000125538;ENSG00000127528;ENSG00000128016;ENSG00000128342…
HALLMARK_INFLAMMATORY_RESPONSE	inflammation	http://www.broadinstitute.org/gsea/msigdb/cards/HALLMARK_INFLAMMATORY_RESPONSE	-0.20353	-1.10407	0.222672	0.280092	199	41	3560;5142;4283;1440;4481;1839;10886;3249;2069;7855;4224;5008;1880;9153;5329;8807;3552;3976;3604;6542;3553;5739;3383;6347;1906;27032;6369;7832;1240;1026;10135;7439;728;2357;2867;2152;3576;1441;3569;6324;136	ENSG00000003989;ENSG00000011422;ENSG00000017260;ENSG00000038945;ENSG00000049249;ENSG00000056291;ENSG00000078401;ENSG00000090339;ENSG00000099985;ENSG00000100385;ENSG00000105707;ENSG00000105711;ENSG00000105835;ENSG00000106178;ENSG00000108342;ENSG00000108691;ENSG00000112818;ENSG00000113070;ENSG00000115008;ENSG00000115607;ENSG00000117525;ENSG00000119535;ENSG00000124762;ENSG00000124882;ENSG00000125538…
HALLMARK_ALLOGRAFT_REJECTION	allograft rejection	http://www.broadinstitute.org/gsea/msigdb/cards/HALLMARK_ALLOGRAFT_REJECTION	-0.181417	-0.988495	0.462882	0.479732	199	33	43;6356;2069;5196;5582;3848;9607;3596;8807;6123;2589;4050;942;4318;924;3976;3553;3383;3594;6347;3824;717;2268;2213;6351;2650;1029;6891;9437;3559;3108;3569;3109	ENSG00000000938;ENSG00000072694;ENSG00000087085;ENSG00000090339;ENSG00000096996;ENSG00000100985;ENSG00000108691;ENSG00000114013;ENSG00000115607;ENSG00000124882;ENSG00000125538;ENSG00000126583;ENSG00000128342;ENSG00000134460;ENSG00000134539;ENSG00000136244;ENSG00000140986;ENSG00000141429;ENSG00000147889;ENSG00000163737;ENSG00000164326;ENSG00000166278;ENSG00000167768;ENSG00000169194;ENSG00000172156…
