# Supplementary material for: Integrated Genomic Analysis of Primary Prostate Tumor Foci and Corresponding Lymph Node Metastases Identifies Mutations and Pathways Associated with Metastasis
Source: Preprints.org preprint supplement (doi:10.20944/preprints202310.1586.v1), 2023-10-25
Supplement: Supplementary file 11 [file Table_S9_GSEA_AA.PTF.G9.vs.W.PTF.G9.xlsx]

## Sheet: Table_S9_GSEA_AA.PTF.G9.vs.W.PT
geneSet	description	link	enrichmentScore	normalizedEnrichmentScore	pValue	FDR	size	leadingEdgeNum	leadingEdgeId	userId
HALLMARK_MYOGENESIS	muscle differentiation	http://www.broadinstitute.org/gsea/msigdb/cards/HALLMARK_MYOGENESIS	0.572016	2.6854	0	0	197	90	7140;5837;4621;58;9659;4208;2170;4625;1160;10174;7134;4641;1760;8912;2273;7138;11155;4632;4633;9215;1410;6450;1756;1346;5213;6709;351;6525;178;26353;10290;3679;4620;7125;274;347;845;3693;6840;23604;4618;5507;140465;6442;29895;7136;23175;6445;10580;115;2049;1191;8038;65055;1292;2934;7164;4638;1152;10278;2775;10014;4684;10468;4209;1012;43;4608;1839;624;22808;9260;4629;187;8557;1674;1837;4656;5621;1…	ENSG00000022267;ENSG00000035664;ENSG00000065534;ENSG00000068615;ENSG00000068976;ENSG00000072195;ENSG00000081189;ENSG00000082781;ENSG00000087085;ENSG00000087258;ENSG00000092054;ENSG00000095637;ENSG00000100842;ENSG00000101470;ENSG00000102683;ENSG00000103197;ENSG00000104936;ENSG00000105048;ENSG00000108515;ENSG00000108823;ENSG00000108840;ENSG00000109063;ENSG00000109846;ENSG00000111046;ENSG00000111245…
HALLMARK_INTERFERON_ALPHA_RESPONSE	interferon alpha response	http://www.broadinstitute.org/gsea/msigdb/cards/HALLMARK_INTERFERON_ALPHA_RESPONSE	-0.477716	-2.02017	0	0	97	43	51056;8767;4938;2634;55281;3430;85441;51667;103;10437;64135;64761;93343;64108;116071;834;3959;3574;7453;115361;841;684;972;55008;3669;5721;9111;961;5698;3627;6402;5720;3659;3107;6890;6373;9830;54625;83666;5696;9246;567;79132	ENSG00000002549;ENSG00000013374;ENSG00000019582;ENSG00000059378;ENSG00000064012;ENSG00000068079;ENSG00000089127;ENSG00000092010;ENSG00000100911;ENSG00000104312;ENSG00000104432;ENSG00000106785;ENSG00000108679;ENSG00000108771;ENSG00000115267;ENSG00000123609;ENSG00000125347;ENSG00000130303;ENSG00000130589;ENSG00000136514;ENSG00000137752;ENSG00000138496;ENSG00000138642;ENSG00000140105;ENSG00000141971…
HALLMARK_MTORC1_SIGNALING	mTORC1 signaling	http://www.broadinstitute.org/gsea/msigdb/cards/HALLMARK_MTORC1_SIGNALING	-0.446711	-2.1112	0	0	200	87	6184;57761;2542;10097;5199;5860;7323;7852;29110;3099;5706;10682;10061;4173;10437;6917;908;10212;10962;8878;30001;6016;811;7037;6781;10213;899;993;5701;3145;1075;27071;6503;7453;205;440;8935;56902;699;9695;6745;5685;23478;10135;1717;10096;586;2539;51569;5718;10987;2107;51377;29968;1718;2058;11151;23753;26747;3313;2745;4171;6652;7296;6319;5464;3689;6713;5704;10197;81873;27346;821;23165;3251;51109;2…	ENSG00000005020;ENSG00000013275;ENSG00000033050;ENSG00000041357;ENSG00000060982;ENSG00000070190;ENSG00000070669;ENSG00000072042;ENSG00000072274;ENSG00000073111;ENSG00000083635;ENSG00000092621;ENSG00000099194;ENSG00000100519;ENSG00000101255;ENSG00000102879;ENSG00000104549;ENSG00000104738;ENSG00000105220;ENSG00000105835;ENSG00000109084;ENSG00000109332;ENSG00000109861;ENSG00000113013;ENSG00000113356…
HALLMARK_MYC_TARGETS_V2	MYC targets, variant 2	http://www.broadinstitute.org/gsea/msigdb/cards/HALLMARK_MYC_TARGETS_V2	-0.563364	-2.17209	0	0	58	29	3177;23082;83743;10514;3099;4173;51491;2193;27340;10196;9221;6723;4839;26354;11335;54663;80324;64216;4174;79077;10199;6652;7965;27346;23160;92856;5245;9136;51154	ENSG00000048162;ENSG00000053372;ENSG00000100297;ENSG00000104738;ENSG00000105447;ENSG00000106305;ENSG00000109084;ENSG00000111641;ENSG00000114767;ENSG00000116649;ENSG00000120800;ENSG00000122565;ENSG00000124383;ENSG00000132382;ENSG00000133316;ENSG00000136718;ENSG00000140263;ENSG00000148840;ENSG00000159399;ENSG00000162851;ENSG00000163811;ENSG00000163938;ENSG00000166197;ENSG00000167085;ENSG00000174669…
HALLMARK_INTERFERON_GAMMA_RESPONSE	interferon gamma response	http://www.broadinstitute.org/gsea/msigdb/cards/HALLMARK_INTERFERON_GAMMA_RESPONSE	-0.46321	-2.1924	0	0	200	86	51056;8767;3937;3587;4790;3430;85441;6375;2209;629;103;51015;10437;7412;27348;64135;5683;55016;6717;64761;3123;6892;6774;64108;116071;5777;7378;834;3959;3574;8673;81030;3108;4502;57823;7453;115361;57674;841;6398;684;84166;3662;972;3117;4283;7903;55008;3383;10135;55024;836;3669;2357;5721;9111;6352;1240;4615;5690;942;5698;3627;3106;5771;3105;837;3001;8202;6772;5720;5743;3659;6890;80830;6373;9830;35…	ENSG00000002549;ENSG00000019582;ENSG00000026751;ENSG00000043462;ENSG00000059378;ENSG00000064012;ENSG00000066583;ENSG00000068079;ENSG00000073756;ENSG00000075142;ENSG00000090339;ENSG00000092010;ENSG00000100385;ENSG00000100911;ENSG00000104312;ENSG00000104432;ENSG00000105835;ENSG00000106588;ENSG00000106785;ENSG00000108679;ENSG00000108691;ENSG00000108771;ENSG00000109320;ENSG00000110324;ENSG00000111679…
HALLMARK_ALLOGRAFT_REJECTION	allograft rejection	http://www.broadinstitute.org/gsea/msigdb/cards/HALLMARK_ALLOGRAFT_REJECTION	-0.551482	-2.58804	0	0	199	117	1445;356;56253;3558;4050;6775;7454;3112;7334;2000;5552;926;4869;8661;3592;3824;9437;1984;924;7076;8767;3596;3937;2634;4528;5199;3976;10225;11184;1991;7097;7321;2113;3589;6892;915;4689;7042;3702;5777;2650;959;6363;940;3574;3561;3594;5917;3460;3108;7453;7186;4067;602;10261;3662;2268;3059;912;972;3117;916;4283;7903;914;3383;3559;917;586;7535;3459;2533;2069;27240;3111;6352;6891;961;9450;2833;729230;9…	ENSG00000000938;ENSG00000005844;ENSG00000010610;ENSG00000012048;ENSG00000015285;ENSG00000019582;ENSG00000027697;ENSG00000043462;ENSG00000054219;ENSG00000060982;ENSG00000066336;ENSG00000069399;ENSG00000072401;ENSG00000072694;ENSG00000076554;ENSG00000081237;ENSG00000082074;ENSG00000085760;ENSG00000090339;ENSG00000092969;ENSG00000095752;ENSG00000096996;ENSG00000100365;ENSG00000100385;ENSG00000102034…
HALLMARK_MYC_TARGETS_V1	MYC targets, variant 1	http://www.broadinstitute.org/gsea/msigdb/cards/HALLMARK_MYC_TARGETS_V1	-0.554117	-2.61881	0	0	200	97	9868;3181;3178;7555;10574;6146;10236;6741;5688;23196;7298;5706;4173;6432;7514;6187;5683;3183;1207;51491;6175;328;10935;3184;10213;1965;7913;6434;3066;3376;1017;9221;6164;6428;6418;5887;6723;10492;7203;3837;26156;5685;26354;4953;6627;51690;1982;3838;6240;56910;6732;6637;5111;10987;6599;11335;9188;2107;26986;4706;2058;5690;57819;2935;6426;10921;6632;3068;4830;11260;5496;5901;52;4174;4171;1964;5682;…	ENSG00000004779;ENSG00000013275;ENSG00000041357;ENSG00000048162;ENSG00000048828;ENSG00000070756;ENSG00000073111;ENSG00000074201;ENSG00000082898;ENSG00000084090;ENSG00000084774;ENSG00000089157;ENSG00000092199;ENSG00000096063;ENSG00000100297;ENSG00000100519;ENSG00000100823;ENSG00000101182;ENSG00000103342;ENSG00000104738;ENSG00000105202;ENSG00000106028;ENSG00000106305;ENSG00000106588;ENSG00000108424…
HALLMARK_E2F_TARGETS	cell cycle progression: E2F targets	http://www.broadinstitute.org/gsea/msigdb/cards/HALLMARK_E2F_TARGETS	-0.408996	-1.93195	0	0.000139	200	78	29089;253714;7398;1434;146909;6790;7112;3148;23468;7157;4605;3930;5885;56655;7153;3014;675;4173;7514;8914;10212;23594;10615;11051;3159;7465;3978;3184;7037;4288;9125;54962;1965;6119;7913;6434;993;9221;4436;9837;10492;55143;55646;9918;54556;1633;51691;197335;55635;3838;79075;6749;2146;5111;3161;4683;332;2935;10606;6426;23047;4830;5901;4174;79077;4171;3070;5395;6118;6427;5591;672;10527;5511;10535;56…	ENSG00000010292;ENSG00000012048;ENSG00000024526;ENSG00000071243;ENSG00000072274;ENSG00000072571;ENSG00000073111;ENSG00000075131;ENSG00000076382;ENSG00000077152;ENSG00000082898;ENSG00000083642;ENSG00000087586;ENSG00000089685;ENSG00000091651;ENSG00000094916;ENSG00000095002;ENSG00000100297;ENSG00000101003;ENSG00000101057;ENSG00000103342;ENSG00000104320;ENSG00000104738;ENSG00000104889;ENSG00000105486…
HALLMARK_INFLAMMATORY_RESPONSE	inflammation	http://www.broadinstitute.org/gsea/msigdb/cards/HALLMARK_INFLAMMATORY_RESPONSE	-0.408827	-1.94016	0	0.000159	199	69	7076;8767;10886;3037;6372;3937;3587;4790;3976;3604;1317;3656;4210;8877;6364;1880;7097;23601;970;6717;3576;55829;6369;6892;64108;29933;10148;5970;3460;5732;23533;136;6504;166929;929;4067;5025;684;3575;1441;719;4283;3383;10135;2357;5054;9111;2069;1236;10507;6352;1240;5724;2773;1536;3269;8685;3627;6402;962;255488;3659;6373;3560;6542;3932;4891;6347;4986	ENSG00000003989;ENSG00000019169;ENSG00000043462;ENSG00000049249;ENSG00000056291;ENSG00000065135;ENSG00000075142;ENSG00000082556;ENSG00000090339;ENSG00000100385;ENSG00000102265;ENSG00000103313;ENSG00000104312;ENSG00000105246;ENSG00000105835;ENSG00000106178;ENSG00000106366;ENSG00000108691;ENSG00000109320;ENSG00000110324;ENSG00000110911;ENSG00000115009;ENSG00000117090;ENSG00000117091;ENSG00000119535…
HALLMARK_IL6_JAK_STAT3_SIGNALING	IL6 STAT3 signaling during acute phase response	http://www.broadinstitute.org/gsea/msigdb/cards/HALLMARK_IL6_JAK_STAT3_SIGNALING	-0.461553	-1.92426	0	0.000248	83	38	23765;9180;5292;7133;3454;7850;3162;1437;7097;960;6774;10148;578;3597;3574;3561;3594;3460;23533;929;3676;1441;4283;3559;10456;3459;4615;3627;2921;5771;10563;6772;3659;4055;51330;6373;1230;2919	ENSG00000006327;ENSG00000026508;ENSG00000027697;ENSG00000028137;ENSG00000030110;ENSG00000096996;ENSG00000100292;ENSG00000104432;ENSG00000105246;ENSG00000111321;ENSG00000115232;ENSG00000115415;ENSG00000115590;ENSG00000119535;ENSG00000125347;ENSG00000131724;ENSG00000134460;ENSG00000137193;ENSG00000137462;ENSG00000138755;ENSG00000141506;ENSG00000142166;ENSG00000143575;ENSG00000145623;ENSG00000147168…
HALLMARK_HEDGEHOG_SIGNALING	Hedgehog signaling	http://www.broadinstitute.org/gsea/msigdb/cards/HALLMARK_HEDGEHOG_SIGNALING	0.56082	1.93097	0	0.000876	36	19	1400;7857;7422;7436;4983;4897;8861;7070;23493;23462;1808;1271;9289;43;8828;2735;7088;5371;5340	ENSG00000072832;ENSG00000079482;ENSG00000087085;ENSG00000091129;ENSG00000092964;ENSG00000111087;ENSG00000112715;ENSG00000118257;ENSG00000122194;ENSG00000122756;ENSG00000135547;ENSG00000140464;ENSG00000147852;ENSG00000154096;ENSG00000164683;ENSG00000171951;ENSG00000196781;ENSG00000198728;ENSG00000205336
HALLMARK_APICAL_JUNCTION	apical junction complex consisting of adherens and tight junctions	http://www.broadinstitute.org/gsea/msigdb/cards/HALLMARK_APICAL_JUNCTION	0.393855	1.87773	0	0.00145961	197	81	84552;58;1004;23114;8910;7106;83700;947;10174;65266;8449;6624;10290;51754;57555;5310;64398;24146;3033;6714;9353;347902;2593;4892;6237;1013;7070;6810;1307;5089;8189;4313;51776;8745;3680;5522;4597;1272;51466;7216;147;140885;3667;5175;268;4902;9344;4318;10398;2771;11096;9459;4628;7414;51208;257194;2037;10000;1002;9379;8503;7408;6251;72;649;91624;2318;88;55742;51148;253559;1006;1495;3757;71;6376;60;4…	ENSG00000006210;ENSG00000008710;ENSG00000018236;ENSG00000035403;ENSG00000039068;ENSG00000044115;ENSG00000055118;ENSG00000066405;ENSG00000067445;ENSG00000072195;ENSG00000072415;ENSG00000074211;ENSG00000075618;ENSG00000075624;ENSG00000077522;ENSG00000079819;ENSG00000084636;ENSG00000087245;ENSG00000091436;ENSG00000100985;ENSG00000101335;ENSG00000103496;ENSG00000104899;ENSG00000106404;ENSG00000110076…
HALLMARK_G2M_CHECKPOINT	cell cycle progression: G2/M checkpoint	http://www.broadinstitute.org/gsea/msigdb/cards/HALLMARK_G2M_CHECKPOINT	-0.356701	-1.6821	0	0.00300911	200	70	4957;6790;7112;6491;7272;3832;10024;7290;4605;3930;5885;7153;4082;3014;675;7514;8065;7371;3799;10212;23594;4751;3159;10432;3184;904;10592;4288;5001;899;6434;993;9221;4502;5887;4928;1063;699;9585;10492;602;3837;1946;4953;4691;3838;2146;6599;3161;1870;3980;10772;332;10926;2935;6426;23047;6632;4174;4171;7150;1871;10419;6118;6427;6713;26271;56992;10146;1736	ENSG00000005156;ENSG00000006634;ENSG00000007968;ENSG00000069399;ENSG00000072571;ENSG00000073111;ENSG00000082898;ENSG00000083642;ENSG00000087586;ENSG00000089685;ENSG00000091651;ENSG00000100084;ENSG00000100297;ENSG00000100462;ENSG00000101057;ENSG00000103342;ENSG00000104549;ENSG00000106462;ENSG00000108424;ENSG00000110713;ENSG00000112029;ENSG00000112242;ENSG00000112742;ENSG00000115053;ENSG00000115758…
HALLMARK_EPITHELIAL_MESENCHYMAL_TRANSITION	epithelial mesenchymal transition	http://www.broadinstitute.org/gsea/msigdb/cards/HALLMARK_EPITHELIAL_MESENCHYMAL_TRANSITION	0.361695	1.72616	0	0.00315276	200	71	7857;1004;4017;6696;333;10486;26585;3725;7422;4487;5654;6641;26577;6443;2201;388;3693;1634;50863;4148;9353;6445;5159;22795;1301;871;1842;7070;8038;1000;1307;1292;4907;2192;5376;7168;6387;4313;4638;6586;8076;25890;1893;2316;2619;7431;50509;5352;30008;64175;3398;10398;4035;6591;5396;10516;1284;10979;7169;6535;2026;5744;25878;57692;59;1289;6422;649;4147;7424;667	ENSG00000011465;ENSG00000019549;ENSG00000026025;ENSG00000060718;ENSG00000065534;ENSG00000073712;ENSG00000077942;ENSG00000080573;ENSG00000082781;ENSG00000084636;ENSG00000087245;ENSG00000087303;ENSG00000087494;ENSG00000101335;ENSG00000101825;ENSG00000102683;ENSG00000104332;ENSG00000105290;ENSG00000106823;ENSG00000107562;ENSG00000107796;ENSG00000109099;ENSG00000111674;ENSG00000112186;ENSG00000112715…
HALLMARK_UV_RESPONSE_DN	UV response: downregulated genes	http://www.broadinstitute.org/gsea/msigdb/cards/HALLMARK_UV_RESPONSE_DN	0.386004	1.76194	0	0.00328412	144	40	10370;10486;5332;10395;323;5581;3778;23266;9863;493;7436;1843;6310;5797;5607;5159;3815;1301;5376;7035;11030;3488;273;7799;1628;3667;4052;8621;857;9975;6383;23345;3480;11099;8405;6591;8613;10516;8821;5468	ENSG00000003436;ENSG00000019549;ENSG00000049323;ENSG00000058668;ENSG00000060718;ENSG00000065883;ENSG00000070778;ENSG00000078053;ENSG00000101333;ENSG00000105516;ENSG00000105974;ENSG00000109099;ENSG00000109452;ENSG00000112186;ENSG00000113721;ENSG00000115461;ENSG00000116731;ENSG00000117114;ENSG00000120129;ENSG00000121067;ENSG00000124788;ENSG00000131018;ENSG00000132170;ENSG00000137764;ENSG00000140092…
HALLMARK_HYPOXIA	response to hypoxia; HIF1A targets	http://www.broadinstitute.org/gsea/msigdb/cards/HALLMARK_HYPOXIA	0.29137	1.38185	0.00843882	0.0789441	199	55	5837;10370;6533;3725;7422;57007;9215;5228;8991;10891;2353;8609;6515;7436;1843;1634;665;5507;5165;771;9435;5155;4601;112464;5033;51129;230;6576;8974;5163;5209;55139;857;6383;8459;55818;23645;2239;23327;55276;1837;2027;3623;25976;2997;1649;23210;284119;2026;6095;10994;9957;6513;596;1289	ENSG00000002587;ENSG00000011465;ENSG00000049759;ENSG00000059804;ENSG00000067992;ENSG00000068976;ENSG00000069667;ENSG00000070495;ENSG00000072682;ENSG00000074410;ENSG00000076716;ENSG00000087074;ENSG00000100075;ENSG00000100311;ENSG00000104765;ENSG00000104812;ENSG00000105135;ENSG00000105974;ENSG00000108515;ENSG00000109107;ENSG00000109819;ENSG00000111674;ENSG00000112715;ENSG00000115548;ENSG00000117394…
HALLMARK_APICAL_SURFACE	membrane proteins in the apical domain	http://www.broadinstitute.org/gsea/msigdb/cards/HALLMARK_APICAL_SURFACE	0.37259	1.35566	0.0775681	0.0859346	44	14	2947;6517;2050;351;51754;9465;9696;5205;7070;3315;2619;55959;266727;5314	ENSG00000058453;ENSG00000081923;ENSG00000106211;ENSG00000112139;ENSG00000118507;ENSG00000134202;ENSG00000137103;ENSG00000142192;ENSG00000154096;ENSG00000170927;ENSG00000180447;ENSG00000181856;ENSG00000196411;ENSG00000196562
HALLMARK_NOTCH_SIGNALING	Notch signaling	http://www.broadinstitute.org/gsea/msigdb/cards/HALLMARK_NOTCH_SIGNALING	0.393549	1.33979	0.115914	0.088647	32	15	408;3280;1840;8324;7855;26508;84441;10402;28514;113878;4851;4854;6934;8321;5578	ENSG00000064225;ENSG00000074181;ENSG00000091073;ENSG00000114315;ENSG00000135144;ENSG00000137486;ENSG00000148400;ENSG00000148737;ENSG00000154229;ENSG00000155760;ENSG00000157240;ENSG00000163251;ENSG00000163909;ENSG00000184384;ENSG00000198719
HALLMARK_ESTROGEN_RESPONSE_EARLY	early estrogen response	http://www.broadinstitute.org/gsea/msigdb/cards/HALLMARK_ESTROGEN_RESPONSE_EARLY	0.293596	1.38215	0.0105708	0.0918095	200	69	10395;9467;5420;55793;7466;27295;10439;3717;3280;5979;2353;26353;10140;56944;6840;8140;3856;771;7869;115;65055;863;23389;6387;7164;6196;64798;8416;3705;2296;9145;11098;55540;2674;5241;3480;22876;2222;4681;9314;58495;3875;51195;9846;26018;9862;7494;5174;7033;25976;9368;28966;79083;6513;26509;596;4602;4886;403;9536;2717;744;54898;2288;1952;80004;5914;3880;9612	ENSG00000004478;ENSG00000008838;ENSG00000012171;ENSG00000033327;ENSG00000054598;ENSG00000056736;ENSG00000064652;ENSG00000066382;ENSG00000068615;ENSG00000071242;ENSG00000074410;ENSG00000079459;ENSG00000082175;ENSG00000096968;ENSG00000100219;ENSG00000100321;ENSG00000100605;ENSG00000102393;ENSG00000103067;ENSG00000103257;ENSG00000107562;ENSG00000108352;ENSG00000109062;ENSG00000109501;ENSG00000111057…
HALLMARK_MITOTIC_SPINDLE	cell cycle progression: mitotic spindle assembly	http://www.broadinstitute.org/gsea/msigdb/cards/HALLMARK_MITOTIC_SPINDLE	0.271935	1.30732	0.0205339	0.104216	200	66	7461;22920;4281;57787;6709;4739;2017;9771;9266;6624;11190;274;6711;4983;3996;85378;55785;9462;55835;8874;23192;121512;2934;10276;79658;2316;55722;201176;64857;25777;10300;9344;23332;84376;9411;55755;7840;11135;6453;8243;25;10435;4628;5829;7414;2037;6904;7277;29;5108;5116;667;50628;10844;55704;3835;3831;9564;6249;9826;4763;4926;3797;832;64411;8440	ENSG00000007047;ENSG00000035403;ENSG00000050820;ENSG00000071051;ENSG00000071205;ENSG00000072501;ENSG00000074054;ENSG00000075391;ENSG00000075618;ENSG00000075945;ENSG00000077549;ENSG00000078674;ENSG00000079482;ENSG00000079616;ENSG00000079819;ENSG00000084731;ENSG00000085733;ENSG00000089159;ENSG00000090924;ENSG00000097007;ENSG00000100242;ENSG00000101871;ENSG00000102606;ENSG00000105443;ENSG00000106665…
